# Supplementary material
Source: PubMed Central journal article supplement (PMC3513569)
Supplement: NIHMS408172-supplement-01.pdf [file NIHMS408172-supplement-01.pdf]

0.5 Upreg

| SYMBOL      | SEARCH_KEY  | ILMN_GENE   | CHROMOSOME | DEFINITION                  | SYNONYMS | pval       | fdr        | fold       |
|-------------|-------------|-------------|------------|-----------------------------|----------|------------|------------|------------|
| KIFAP3      | NM_014970.2 | KIFAP3      | 1          | Homo sapiens SMAP; Smg-G    |          | 0.01261645 | 0.04992347 | 1.20528951 |
| IQGAP1      | NM_003870.3 | IQGAP1      | 15         | Homo sapiens HUMORFA01;     |          | 0.01252597 | 0.04966924 | 1.10988334 |
| ADPRHL1     | NM_199162.1 | ADPRHL1     | 13         | Homo sapiens ARH2           |          | 0.01254055 | 0.04966762 | 13.3235398 |
| FOSB        | NM_006732.1 | FOSB        | 19         | Homo sapiens GOS3; G0S3;    |          | 0.01252152 | 0.04966643 | 1.06063064 |
| CHMP2A      | NM_198426.1 | CHMP2A      | 19         | Homo sapiens VPS2; VPS2A;   |          | 0.01250104 | 0.04962975 | 1.0991335  |
| FAM13A      | NM_014883.2 | FAM13A      | 4          | Homo sapiens FLJ34562; MG   |          | 0.01249264 | 0.04961127 | 3.44150143 |
| PHC3        | NM_024947.2 | PHC3        | 3          | Homo sapiens FLJ12729; HPI  |          | 0.01244253 | 0.04950126 | 1.57710007 |
| TJP1        | NM_003257.2 | TJP1        | 15         | Homo sapiens MGC133289; I   |          | 0.01245718 | 0.04950012 | 1.08649305 |
|             | Hs.559234   | HS.559234   |            | UI-H-BI1-adn-f-06-0-UI.s1 N |          | 0.01244481 | 0.04949547 | 2.22454952 |
| COX6A1      | NM_004373.2 | COX6A1      | 12         | Homo sapiens COX6AL; COX6   |          | 0.01240413 | 0.04939296 | 1.05484685 |
| TM9SF3      | NM_020123.2 | TM9SF3      | 10         | Homo sapiens RP11-34E5.1;   |          | 0.01236121 | 0.04926646 | 1.21405818 |
|             | Hs.208405   | HS.208405   |            | 4 DA311740 BRHIP3 Homo sa   |          | 0.01232834 | 0.04919459 | 2.27332032 |
| THBS3       | NM_007112.3 | THBS3       | 1          | Homo sapiens MGC119564; T   |          | 0.01227595 | 0.04907418 | 1.79122773 |
| ABCB6       | NM_005689.1 | ABCB6       | 2          | Homo sapiens ABC; EST4559   |          | 0.01228402 | 0.04906206 | 1.26763733 |
| DKFZp761E19 | NM_138368.2 | DKFZP761E19 | 11         | Homo sapiens PP1030         |          | 0.01227654 | 0.04906175 | 4.5978242  |
| MID1        | NM_033290.1 | MID1        |            | Homo sapiens RNF59; OGS1;   |          | 0.01226047 | 0.04904189 | 1.18404279 |
| SIPA1L1     | NM_015556.1 | SIPA1L1     | 14         | Homo sapiens E6TP1; KIAA0   |          | 0.01219942 | 0.04882716 | 1.99691868 |
| PRKAG1      | NM_002733.3 | PRKAG1      | 12         | Homo sapiens AMPKG; MGCE    |          | 0.01213947 | 0.04863124 | 1.19629841 |
| TRAPP1      | NM_021210.2 | TRAPP1      | 17         | Homo sapiens BET5; MUM2     |          | 0.01212451 | 0.04858601 | 1.098739   |
| LOC10013254 | XR_039468.1 | LOC10013254 | 12         | PREDICTED: Homo sapiens n   |          | 0.01210901 | 0.04855323 | 1.09197684 |
| KIAA1467    | NM_020853.1 | KIAA1467    | 12         | Homo sapiens DKFZp781O01    |          | 0.01209145 | 0.0484975  | 1.40612554 |
| NUAK1       | NM_014840.2 | NUAK1       | 12         | Homo sapiens KIAA0537; AR   |          | 0.01208386 | 0.04848175 | 1.20035706 |
| LOC10012897 | XR_037834.1 | LOC10012897 |            | PREDICTED: Homo sapiens n   |          | 0.01201336 | 0.04833055 | 1.98016513 |
| LIMCH1      | NM_014988.1 | LIMCH1      | 4          | Homo sapiens DKFZp686B24    |          | 0.01199616 | 0.04830533 | 4.16225873 |
| LRIG1       | NM_015541.2 | LRIG1       | 3          | Homo sapiens LIG-1; LIG1; I |          | 0.0119979  | 0.04829765 | 2.42564164 |
| WDR68       | NM_00100372 | WDR68       | 17         | Homo sapiens AN11; HAN11    |          | 0.01198214 | 0.04827821 | 1.06617623 |
| PRRC1       | NM_130809.2 | PRRC1       | 5          | Homo sapiens FLJ32875       |          | 0.01198511 | 0.04827546 | 1.11876806 |
| ENDOD1      | XM_943182.1 | ENDOD1      | 11         | Homo sapiens MGC88092; KI   |          | 0.01197456 | 0.04826231 | 1.17345609 |
| HOXC8       | NM_022658.3 | HOXC8       | 12         | Homo sapiens HOX3; HOX3A    |          | 0.01191854 | 0.04810966 | 2.44972428 |
| C16orf57    | NM_024598.2 | C16ORF57    | 16         | Homo sapiens FLJ13154       |          | 0.01188885 | 0.04803372 | 1.07923321 |
| TAF7        | NM_005642.2 | TAF7        | 5          | Homo sapiens TAFII55; TAF2  |          | 0.0118544  | 0.04798228 | 1.21614837 |
| SRXN1       | NM_080725.1 | SRXN1       | 20         | Homo sapiens Npn3; SRX1; C  |          | 0.0118592  | 0.04795776 | 1.07631287 |
| LOC728820   | XR_038223.1 | LOC728820   |            | PREDICTED: Homo sapiens n   |          | 0.01186089 | 0.04794998 | 1.05492577 |
| LOC730324   | XM_00172209 | LOC730324   | 7          | PREDICTED: Homo sapiens h   |          | 0.01183759 | 0.04792887 | 1.17990551 |
| C9orf46     | NM_018465.1 | C9ORF46     | 9          | Homo sapiens FLJ39176; FLJ  |          | 0.01179919 | 0.0478026  | 1.11971413 |
| LRRC1       | NM_025168.1 | LRRC1       | 6          | Homo sapiens dJ523E19.1; L  |          | 0.01171466 | 0.04756189 | 1.19119985 |
| SPRED2      | NM_181784.1 | SPRED2      | 2          | Homo sapiens MGC163164; I   |          | 0.01167021 | 0.04745406 | 1.17820656 |
| MAN2A2      | NM_006122.2 | MAN2A2      | 15         | Homo sapiens MANA2X         |          | 0.01163094 | 0.04732342 | 2.71919251 |
| FZD3        | NM_017412.2 | FZD3        | 8          | Homo sapiens hFz3; Fz-3     |          | 0.01161648 | 0.04729361 | 2.30063214 |
| COPG2       | NM_012133.2 | COPG2       | 7          | Homo sapiens FLJ11781; 2-C  |          | 0.01158063 | 0.04716218 | 1.3115124  |
| CYorf15A    | NM_00100585 | CYORF15A    |            | Homo sapiens MGC131732; I   |          | 0.01156097 | 0.04714002 | 1.94038652 |
| PTPRA       | NM_002836.2 | PTPRA       | 20         | Homo sapiens HPTPalpha; RF  |          | 0.01157118 | 0.04713816 | 1.19633773 |
| FGFR1OP2    | NM_015633.1 | FGFR1OP2    | 12         | Homo sapiens DKFZp564O18    |          | 0.01153182 | 0.04703562 | 1.14059387 |
| CAMTA1      | NM_015215.1 | CAMTA1      | 1          | Homo sapiens KIAA0833       |          | 0.01150212 | 0.04694338 | 1.31301408 |
| PDRG1       | NM_030815.2 | PDRG1       | 20         | Homo sapiens PDRG; C20orf   |          | 0.01149581 | 0.04693209 | 1.16122581 |
| LOC730262   | XM_371302.3 | LOC730262   | 1          | PREDICTED: Homo sapiens s   |          | 0.01148957 | 0.04692106 | 1.50971763 |
| TCF7L2      | NM_030756.1 | TCF7L2      | 10         | Homo sapiens TCF-4; TCF4    |          | 0.01139555 | 0.04665208 | 1.17080398 |
|             | Hs.566306   | HS.566306   |            | 5 op77c07.s1 Soares_NFL_T_C |          | 0.01140497 | 0.0466474  | 3.04200433 |
| SNX3        | NM_152828.2 | SNX3        | 6          | Homo sapiens SDP3; MGC17    |          | 0.01134158 | 0.0464742  | 1.04627762 |
| HLA-G       | NM_002127.3 | HLA-G       | 6          | Homo sapiens MHC-G          |          | 0.0112994  | 0.04633    | 1.39769334 |
| AGRN        | NM_198576.2 | AGRN        | 1          | Homo sapiens FLJ45064       |          | 0.01126993 | 0.04623774 | 1.18650676 |
| OR8K5       | NM_00100405 | OR8K5       | 11         | Homo sapiens OR11-174       |          | 0.01124723 | 0.04618753 | 2.59879951 |
| WWC1        | NM_015238.1 | WWC1        | 5          | Homo sapiens FLJ10865; KIA  |          | 0.01123919 | 0.04616879 | 1.12296189 |
| RILPL2      | NM_145058.1 | RILPL2      | 12         | Homo sapiens FLJ30380; MG   |          | 0.01122872 | 0.04614009 | 1.28748078 |
| ZFYVE19     | NM_032850.3 | ZFYVE19     | 15         | Homo sapiens FLJ14840; MP   |          | 0.01121487 | 0.04612608 | 1.18778134 |
| PITPNM1     | NM_004910.1 | PITPNM1     | 11         | Homo sapiens NIR2; PITPNM   |          | 0.01119522 | 0.04608814 | 1.08545878 |
| C20orf127   | NM_080757.1 | C20ORF127   | 20         | Homo sapiens dJ614O4.6; M   |          | 0.01119108 | 0.04608543 | 1.08034107 |
| PPOX        | NM_000309.2 | PPOX        | 1          | Homo sapiens MGC8485; VP;   |          | 0.0111686  | 0.04602144 | 1.18514511 |
| C19orf53    | NM_014047.1 | C19ORF53    | 19         | Homo sapiens HSPC023        |          | 0.01115517 | 0.04599468 | 1.05416641 |
| C20orf94    | NM_00100960 | C20ORF94    | 20         | Homo sapiens dJ1099D15.3;   |          | 0.0110749  | 0.0457491  | 1.31613819 |
| PRAGMIN     | NM_00108082 | PRAGMIN     | 8          | Homo sapiens DKFZp761P04    |          | 0.01104855 | 0.04569722 | 1.08557578 |
| SP100       | NM_00108039 | SP100       | 2          | Homo sapiens DKFZp686E07    |          | 0.01104118 | 0.04568098 | 1.73967214 |
| MYOM2       | NM_003970.1 | MYOM2       | 8          | Homo sapiens TTNAP          |          | 0.01102582 | 0.04563167 | 1.85272534 |
|             | Hs.583755   | HS.583755   |            | 8 Homo sapiens cDNA FLJ3105 |          | 0.01099574 | 0.04554984 | 2.2947265  |
| LAMB1       | NM_002291.1 | LAMB1       | 7          | Homo sapiens MGC142015; C   |          | 0.01095442 | 0.04539288 | 1.27306309 |
| FBXO21      | NM_033624.2 | FBXO21      | 12         | Homo sapiens FBX21; MGC20   |          | 0.0109372  | 0.04534987 | 1.12987105 |
| KIAA0513    | NM_014732.2 | KIAA0513    | 16         | Homo sapiens KIAA0513 (KI   |          | 0.01092681 | 0.04532097 | 6.9994587  |
| BSCL2       | NM_032667.4 | BSCL2       | 11         | Homo sapiens SPG17; MGC4    |          | 0.01087056 | 0.04515832 | 1.08490551 |
| TMEM69      | NM_016486.3 | TMEM69      | 1          | Homo sapiens C1orf154; MG   |          | 0.01085785 | 0.04513379 | 1.08719663 |

0.5 Upreg

|           |             |           |    |                           |                |            |            |            |
|-----------|-------------|-----------|----|---------------------------|----------------|------------|------------|------------|
| VEZF1     | NM_007146.2 | VEZF1     | 17 | Homo sapiens              | DB1; ZNF161    | 0.01084917 | 0.04511186 | 1.05606812 |
| FAM83B    | NM_00101087 | FAM83B    | 6  | Homo sapiens              | FLJ30642; MG   | 0.01083221 | 0.04505547 | 2.451426   |
| MGC72104  | NM_207350.1 | MGC72104  | 20 | Homo sapiens              | similar to FRG | 0.01078043 | 0.04493878 | 1.19939738 |
| RICS      | NM_014715.2 | RICS      | 11 | Homo sapiens              | KIAA0712; MC   | 0.01076083 | 0.0449136  | 1.2094009  |
| EFCAB7    | NM_032437.1 | EFCAB7    | 1  | Homo sapiens              | DKFZp666D22    | 0.0107626  | 0.04490683 | 10.6228812 |
| DGCR2     | NM_005137.1 | DGCR2     | 22 | Homo sapiens              | SEZ-12; IDD;   | 0.0107558  | 0.04490675 | 1.16083029 |
| TMEM160   | NM_017854.1 | TMEM160   | 19 | Homo sapiens              | FLJ20512       | 0.01074492 | 0.04487545 | 1.07792621 |
| TPST2     | NM_00100856 | TPST2     | 22 | Homo sapiens              | tyrosylprotein | 0.01073296 | 0.04483962 | 1.18789988 |
| NBPF9     | XM_933968.1 | NBPF9     | 1  | PREDICTED: Homo sapiens   | n              | 0.01069787 | 0.04474945 | 1.4441374  |
| FAM83D    | NM_030919.1 | FAM83D    | 20 | Homo sapiens              | C2orf129; FL   | 0.01066555 | 0.04464242 | 1.08598503 |
| POR       | NM_000941.1 | POR       | 7  | Homo sapiens              | CPR; FLJ26461  | 0.01065356 | 0.04463452 | 1.15028716 |
| PLEKHG4   | NM_015432.2 | PLEKHG4   | 16 | Homo sapiens              | puratrophin1;  | 0.01064626 | 0.04461801 | 1.25244458 |
| SLC1A5    | NM_005628.1 | SLC1A5    | 19 | Homo sapiens              | M7V1; ATBO;    | 0.01063005 | 0.04457829 | 1.09710566 |
| GALNT2    | NM_004481.2 | GALNT2    | 1  | Homo sapiens              | GalNAc-T2      | 0.01057578 | 0.04440688 | 2.68125684 |
| KCNRG     | NM_173605.1 | KCNRG     | 13 | Homo sapiens              | DLTET          | 0.01054385 | 0.04435713 | 2.51466333 |
| LOC645113 | XM_930333.1 | LOC645113 | 22 | PREDICTED: Homo sapiens   | h              | 0.01052432 | 0.04434533 | 1.26993346 |
| C15orf57  | NM_052849.2 | C15ORF57  | 15 | Homo sapiens              | MGC20481; FL   | 0.01053484 | 0.04433328 | 1.15354115 |
| GBF1      | NM_004193.1 | GBF1      | 10 | Homo sapiens              | KIAA0248; MC   | 0.01045295 | 0.04408665 | 1.36510932 |
|           | Hs.145985   | HS.145985 | 19 | qm64a10.x1                | Soares_placent | 0.0104446  | 0.04406546 | 2.17575713 |
|           | Hs.564221   | HS.564221 | 11 | UI-H-BW1-anf-b-07-0-UI.s1 |                | 0.01043629 | 0.04404442 | 40.3287209 |
| RAB11FIP5 | NM_015470.1 | RAB11FIP5 | 2  | Homo sapiens              | RIP11; pp75;   | 0.01041629 | 0.04404413 | 1.11465013 |
| HMGB3     | NM_005342.2 | HMGB3     | X  | Homo sapiens              | MGC90319; H    | 0.01042075 | 0.0440349  | 1.10931851 |
| GDAP2     | NM_017686.1 | GDAP2     | 1  | Homo sapiens              | FLJ20142; dJ7  | 0.01037079 | 0.04392177 | 2.08195664 |
| C14orf93  | NM_021944.1 | C14ORF93  | 14 | Homo sapiens              | FLJ12154       | 0.010356   | 0.04387316 | 1.17938448 |
| ADARB1    | NM_00103304 | ADARB1    | 21 | Homo sapiens              | ADAR2a; ADAI   | 0.01033456 | 0.04382434 | 1.33277674 |
| JAG1      | NM_000214.1 | JAG1      | 20 | Homo sapiens              | CD339; AWS;    | 0.0102798  | 0.04369    | 1.22876083 |
| C16orf58  | NM_022744.1 | C16ORF58  | 16 | Homo sapiens              | FLJ13868       | 0.01028145 | 0.04368298 | 1.08126663 |
| AKAP8L    | NM_014371.2 | AKAP8L    | 19 | Homo sapiens              | HAP95; NAKAI   | 0.01025297 | 0.04367396 | 1.43269946 |
| TLE2      | NM_003260.3 | TLE2      | 19 | Homo sapiens              | FLJ41188; GR   | 0.01025339 | 0.04366173 | 1.39534308 |
| HSPA12A   | XM_945467.1 | HSPA12A   |    | PREDICTED: Homo sapiens   | h              | 0.01025503 | 0.04365468 | 1.27923099 |
| LOC441714 | XR_019458.2 | LOC441714 |    | PREDICTED: Homo sapiens   | n              | 0.01025515 | 0.0436412  | 3.95328285 |
| TM2D2     | NM_078473.2 | TM2D2     | 8  | Homo sapiens              | MGC125814; I   | 0.0102209  | 0.04357936 | 1.4893068  |
| ETFDH     | NM_004453.1 | ETFDH     | 4  | Homo sapiens              | MADD; ETFQO    | 0.01021698 | 0.04357668 | 1.2293979  |
| COL4A5    | NM_033381.1 | COL4A5    | X  | Homo sapiens              | MGC42377; A    | 0.01020489 | 0.04355312 | 1.30264314 |
| CLIC4     | XM_938776.1 | CLIC4     | 1  | Homo sapiens              | p64H1; CLIC4   | 0.01016094 | 0.04342147 | 1.13195294 |
| MYO10     | NM_012334.1 | MYO10     | 5  | Homo sapiens              | KIAA0799; MC   | 0.01010149 | 0.04322315 | 1.16498887 |
| RND3      | NM_005168.3 | RND3      | 2  | Homo sapiens              | Rho8; Rho      | 0.01009636 | 0.04321516 | 1.27088652 |
| WDR59     | NM_030581.3 | WDR59     | 16 | Homo sapiens              | FLJ12270; MG   | 0.01008791 | 0.04320688 | 1.07619244 |
| LOC401305 | XM_376573.3 | LOC401305 | 7  | PREDICTED: Homo sapiens   | s              | 0.01007374 | 0.04317411 | 1.60366052 |
| LOC648390 | XR_037845.1 | LOC648390 | 2  | PREDICTED: Homo sapiens   | n              | 0.01005404 | 0.04315945 | 1.06435611 |
| SEPX1     | NM_016332.2 | SEPX1     | 16 | Homo sapiens              | MSRB1; SELR;   | 0.01006017 | 0.04315779 | 1.09773052 |
| LCMT1     | NM_00103239 | LCMT1     | 16 | Homo sapiens              | LCMT; PPMT1;   | 0.01006324 | 0.04315701 | 1.08349665 |
| LOC643319 | XM_927980.1 | LOC643319 | 8  | PREDICTED: Homo sapiens   | s              | 0.01004666 | 0.04315572 | 1.59137046 |
| PTTG1IP   | NM_004339.2 | PTTG1IP   | 21 | Homo sapiens              | C21orf3; C21c  | 0.01004928 | 0.04315297 | 1.07782718 |
|           | Hs.575583   | HS.575583 | 8  | 602538216F1               | NIH_MGC_59     | 0.01005549 | 0.0431517  | 1.17066749 |
| COL6A1    | NM_001848.1 | COL6A1    | 21 | Homo sapiens              | OPLL           | 0.01006361 | 0.04314466 | 1.13934837 |
| GRAMD3    | NM_023927.1 | GRAMD3    | 5  | Homo sapiens              | NS3TP2; FLJ2   | 0.00999934 | 0.04305011 | 1.77068313 |
| DCAF7     | NM_005828.2 | DCAF7     | 17 | Homo sapiens              | AN11; HAN11    | 0.01001233 | 0.04305009 | 1.07303496 |
| TJP3      | NM_014428.1 | TJP3      | 19 | Homo sapiens              | ZO-3; MGC11    | 0.00999059 | 0.04304039 | 1.12717802 |
| TOB1      | NM_005749.2 | TOB1      | 17 | Homo sapiens              | MGC104792; T   | 0.01000018 | 0.04303275 | 1.1313057  |
| PCCA      | NM_000282.2 | PCCA      | 13 | Homo sapiens              | propionyl Coer | 0.01000303 | 0.04302407 | 1.17855799 |
| ADD1      | NM_001119.3 | ADD1      | 4  | Homo sapiens              | ADDA; MGC44    | 0.00994249 | 0.04291686 | 1.08127836 |
|           | Hs.582457   | HS.582457 | 5  | DA175295                  | BRAMY2         | 0.00987966 | 0.04272914 | 2.14481082 |
| PECR      | NM_018441.2 | PECR      | 2  | Homo sapiens              | HSA250303; T   | 0.0097902  | 0.04242528 | 1.47187386 |
| NRD1      | NM_002525.1 | NRD1      | 1  | Homo sapiens              | hNRD2; hNRD    | 0.00975887 | 0.04234485 | 1.06375439 |
| PCYOX1L   | NM_024028.2 | PCYOX1L   | 5  | Homo sapiens              | MGC3265        | 0.00974769 | 0.04232407 | 1.44416498 |
| KLF13     | NM_015995.2 | KLF13     | 15 | Homo sapiens              | NSLP1; FKLF2   | 0.00973938 | 0.04231571 | 1.09584708 |
| RHBDL3    | NM_138328.2 | RHBDL3    | 17 | Homo sapiens              | RHBDL4; FLJ4   | 0.0097152  | 0.04222449 | 1.26251748 |
| CRIPT     | NM_014171.3 | CRIPT     | 2  | Homo sapiens              | HSPC139        | 0.00967061 | 0.04209973 | 1.09687317 |
| LOC284293 | XM_209104.2 | LOC284293 | 18 | PREDICTED: Homo sapiens   | s              | 0.0096361  | 0.04199086 | 2.34193876 |
| TMEM189   | NM_199129.1 | TMEM189   | 20 | Homo sapiens              | UBE2V1; Kua    | 0.00962709 | 0.0419792  | 1.13786447 |
| TMEM66    | NM_016127.4 | TMEM66    | 8  | Homo sapiens              | FLJ22274; FO   | 0.00952599 | 0.04156568 | 1.05265084 |
| PRDX1     | NM_181696.1 | PRDX1     | 1  | Homo sapiens              | MSP23; PAG; I  | 0.00950316 | 0.04147971 | 1.04330154 |
| KDM6B     | NM_00108042 | KDM6B     | 17 | Homo sapiens              | KIAA0346       | 0.00941231 | 0.04116448 | 2.19473725 |
| FANCA     | NM_000135.2 | FANCA     | 16 | Homo sapiens              | FAA; FA; FA1;  | 0.00940864 | 0.04116204 | 4.06393432 |
| RRAGD     | NM_021244.2 | RRAGD     | 6  | Homo sapiens              | RRAGD; DKFZP   | 0.00939739 | 0.04113994 | 1.12413891 |
| FUT4      | NM_002033.2 | FUT4      | 11 | Homo sapiens              | FCT3A; ELFT;   | 0.00938162 | 0.04113886 | 2.84717308 |
| CENPE     | NM_001813.2 | CENPE     | 4  | Homo sapiens              | KIF10          | 0.00939871 | 0.04113215 | 1.11681622 |
| FBXO17    | NM_148169.1 | FBXO17    | 19 | Homo sapiens              | FBXO26; MGC    | 0.00938572 | 0.0411296  | 1.73035333 |
| KRTAP10-3 | NM_198696.2 | KRTAP10-3 | 21 | Homo sapiens              | KAP10.3; KAP   | 0.0093691  | 0.04109754 | 3.83830697 |

0.5 Upreg

|             |             |              |    |                              |            |            |            |
|-------------|-------------|--------------|----|------------------------------|------------|------------|------------|
| GATAD2B     | NM_020699.1 | GATAD2B      | 1  | Homo sapiens MGC138285; I    | 0.00935472 | 0.04104804 | 1.21091684 |
| C7orf54     | NM_014411.2 | C7ORF54      | 7  | Homo sapiens NSG-X; NAG8;    | 0.00927258 | 0.04083633 | 1.71824015 |
| CELSR2      | NM_001408.1 | CELSR2       | 1  | Homo sapiens CDHF10; FLJ4    | 0.0092653  | 0.0408178  | 1.35547537 |
| LOC284701   | XM_935939.1 | LOC284701    |    | PREDICTED: Homo sapiens h    | 0.00926079 | 0.04081152 | 1.40958096 |
| MTRF1L      | NM_019041.3 | MTRF1L       | 6  | Homo sapiens MGC102748       | 0.00921968 | 0.04067092 | 1.09183931 |
| LOC642111   | XM_936250.1 | LOC642111    |    | PREDICTED: Homo sapiens h    | 0.00921311 | 0.04065547 | 1.96367622 |
| ECHDC2      | NM_018281.1 | ECHDC2       | 1  | Homo sapiens FLJ10948        | 0.00920442 | 0.04063063 | 1.11195739 |
| SLC38A6     | NM_153811.1 | SLC38A6      | 14 | Homo sapiens NAT-1; MGC1C    | 0.00919755 | 0.04061383 | 4.96455478 |
|             | Hs.482960   | HS.482960    | 5  | Homo sapiens partial mRNA;   | 0.00916586 | 0.04051437 | 1.98551921 |
| HOXA2       | NM_006735.3 | HOXA2        | 7  | Homo sapiens HOX1K           | 0.00914312 | 0.04042737 | 3.81406019 |
| GYG1        | NM_004130.2 | GYG1         | 3  | Homo sapiens GYG             | 0.00910271 | 0.04028899 | 1.07674628 |
| CLDN12      | NM_012129.2 | CLDN12       | 7  | Homo sapiens claudin 12 (CL  | 0.009092   | 0.04025502 | 1.11867298 |
| POLR2J4     | NM_175064.2 | POLR2J4      |    | Homo sapiens RPB11-phi; M    | 0.00898663 | 0.03994863 | 1.75122781 |
| LOC730740   | XM_930111.1 | LOC730740    |    | PREDICTED: Homo sapiens s    | 0.00898199 | 0.03994138 | 1.04573188 |
| HES6        | NM_018645.3 | HES6         | 2  | Homo sapiens hairy and enh   | 0.00896256 | 0.03990855 | 1.07035634 |
| FAM176A     | NM_00113503 | FAM176A      | 2  | Homo sapiens family with sei | 0.00896536 | 0.0399076  | 1.45155421 |
| FGFRL1      | NM_00100435 | FGFRL1       | 4  | Homo sapiens FGFR5; FHFR     | 0.00888922 | 0.03966192 | 1.1327923  |
| RPL18A      | NM_000980.2 | RPL18A       | 19 | Homo sapiens ribosomal prot  | 0.00885685 | 0.03957073 | 1.04334248 |
| FAM122B     | NM_145284.3 | FAM122B      |    | Homo sapiens MGC131814; I    | 0.00884392 | 0.03952629 | 1.09675612 |
| STK38       | NM_007271.2 | STK38        | 6  | Homo sapiens NDR1; NDR       | 0.0088297  | 0.03948939 | 1.16342971 |
| LOC10013132 | XR_039461.1 | LOC100131323 |    | PREDICTED: Homo sapiens n    | 0.00882408 | 0.03947755 | 2.40149176 |
| ZNF252      | NR_023392.1 | ZNF252       | 8  | Homo sapiens zinc finger pro | 0.00880767 | 0.03943078 | 1.1466117  |
| KIAA1345    | XM_944553.1 | KIAA1345     |    | PREDICTED: Homo sapiens K    | 0.00879281 | 0.03939082 | 5.2982068  |
| MAN2B2      | NM_015274.1 | MAN2B2       | 4  | Homo sapiens KIAA0935        | 0.00875923 | 0.03925366 | 1.0984937  |
| RAD51L3     | NM_002878.2 | RAD51L3      | 17 | Homo sapiens R51H3; Trad;    | 0.00872406 | 0.03918878 | 1.772124   |
| C4orf33     | NM_173487.1 | C4ORF33      | 4  | Homo sapiens FLJ33703        | 0.00868484 | 0.03910539 | 1.71069023 |
| BLVRB       | NM_000713.1 | BLVRB        |    | Homo sapiens BVRB; MGC11     | 0.00869319 | 0.03910314 | 1.12458707 |
| SPTAN1      | NM_003127.1 | SPTAN1       | 9  | Homo sapiens FLJ44613; (AL   | 0.00865937 | 0.03903048 | 1.15078089 |
| LOC646942   | XR_016892.2 | LOC646942    | 7  | PREDICTED: Homo sapiens n    | 0.00863271 | 0.0389368  | 1.07095187 |
| NOV         | NM_002514.2 | NOV          | 8  | Homo sapiens IGFBP9; NOV     | 0.00853359 | 0.03856845 | 1.47793239 |
| ERLIN2      | NM_00100379 | ERLIN2       | 8  | Homo sapiens C8orf2; MGC8    | 0.00850575 | 0.03845573 | 4.73483217 |
| BTG1        | NM_001731.1 | BTG1         | 12 | Homo sapiens B-cell transloc | 0.00845475 | 0.03825125 | 1.07549505 |
| SH2B3       | NM_005475.1 | SH2B3        | 12 | Homo sapiens LNK             | 0.0084383  | 0.03821597 | 1.14661614 |
| RTN4R       | NM_023004.5 | RTN4R        | 22 | Homo sapiens NOGOR; NGR      | 0.00839929 | 0.03810437 | 1.31233684 |
| ZNF18       | NM_144680.2 | ZNF18        | 17 | Homo sapiens KOX11; ZKSC     | 0.00838033 | 0.03804442 | 1.48149525 |
| AGPAT2      | NM_00101272 | AGPAT2       | 9  | Homo sapiens LPAAB; LPAAT    | 0.00838209 | 0.03803935 | 1.11625354 |
| LOC643272   | XM_926633.1 | LOC643272    | 3  | PREDICTED: Homo sapiens h    | 0.00830867 | 0.03780971 | 1.12740981 |
| LOC652164   | XM_941509.1 | LOC652164    |    | PREDICTED: Homo sapiens s    | 0.00829753 | 0.03778499 | 2.91256809 |
| ASNSD1      | NM_019048.1 | ASNSD1       | 2  | Homo sapiens NBLA00058; N    | 0.00823207 | 0.0375643  | 1.06934119 |
| RNF43       | NM_017763.3 | RNF43        | 17 | Homo sapiens FLJ20315; DK    | 0.00821763 | 0.03751131 | 1.26428015 |
| UBA1        | NM_003334.3 | UBA1         |    | Homo sapiens UBA1A; A1S9;    | 0.00820451 | 0.03747724 | 1.05198301 |
| SUMF1       | NM_182760.2 | SUMF1        | 3  | Homo sapiens MGC131853; I    | 0.00819665 | 0.03746717 | 1.19375444 |
| LOC646195   | XM_929151.1 | LOC646195    | 11 | PREDICTED: Homo sapiens s    | 0.00818819 | 0.03744143 | 1.10463414 |
| PXDN        | NM_012293.1 | PXDN         | 2  | Homo sapiens D2S448E; D2     | 0.00817429 | 0.03740366 | 1.27285486 |
| CHP         | NM_007236.3 | CHP          | 15 | Homo sapiens SLC9A1BP        | 0.00816422 | 0.0373834  | 1.06071364 |
| EHBP1L1     | NM_00109940 | EHBP1L1      | 11 | Homo sapiens FLJ35431; TA    | 0.00808304 | 0.03715285 | 1.15563538 |
| PRKY        | NM_002760.2 | PRKY         |    | Homo sapiens protein kinase  | 0.00808427 | 0.03714561 | 2.88722288 |
|             | Hs.136788   | HS.136788    | 5  | ac76f10.x5 Stratagene lung ( | 0.00806295 | 0.03708623 | 2.46998941 |
| RNF181      | NM_016494.3 | RNF181       | 2  | Homo sapiens HSPC238         | 0.00803316 | 0.03698767 | 1.06181789 |
| LOC10013178 | XR_039693.1 | LOC10013178  | 1  | PREDICTED: Homo sapiens n    | 0.0080276  | 0.03697494 | 1.09510669 |
| PTMS        | NM_002824.4 | PTMS         | 12 | Homo sapiens parathyrosin    | 0.00795148 | 0.03676484 | 1.09558173 |
| AFF4        | NM_014423.2 | AFF4         | 5  | Homo sapiens AF5Q31; MGC     | 0.00788997 | 0.03658254 | 1.28289574 |
| KIF20A      | NM_005733.1 | KIF20A       | 5  | Homo sapiens RAB6KIFL; MK    | 0.00786242 | 0.03650587 | 1.08193004 |
| BAPX1       | NM_001189.2 | BAPX1        | 4  | Homo sapiens NKX3B; NKX3     | 0.00784639 | 0.03644419 | 8.05419368 |
| SYT7        | XM_943690.1 | SYT7         |    | PREDICTED: Homo sapiens s    | 0.00782245 | 0.0363585  | 1.31823425 |
| HERC5       | NM_016323.1 | HERC5        | 4  | Homo sapiens CEBP1; CEB1     | 0.00781371 | 0.0363306  | 1.1434594  |
| FLJ46284    | XM_499123.2 | FLJ46284     | 8  | PREDICTED: Homo sapiens h    | 0.00780033 | 0.03630659 | 2.15194798 |
| CECR6       | NM_031890.2 | CECR6        | 22 | Homo sapiens cat eye syndr   | 0.00774772 | 0.03613784 | 2.02215596 |
| CSRNP2      | NM_030809.1 | CSRNP2       | 12 | Homo sapiens FLJ25576; C1    | 0.00761306 | 0.03567292 | 1.27594873 |
| BRSK1       | NM_032430.1 | BRSK1        | 19 | Homo sapiens KIAA1811; FL    | 0.00760795 | 0.03566161 | 1.16116369 |
| FNBP1       | NM_015033.2 | FNBP1        | 9  | Homo sapiens FBP17; MGC1     | 0.0075997  | 0.0356355  | 1.0982142  |
| TWF2        | NM_007284.3 | TWF2         | 3  | Homo sapiens USTP011; A6F    | 0.00758996 | 0.03561505 | 1.11011032 |
| HSD17B10    | NM_004493.2 | HSD17B10     |    | Homo sapiens HCD2; ABAD;     | 0.00759024 | 0.03560377 | 1.15573929 |
| GMPPA       | NM_013335.2 | GMPPA        | 2  | Homo sapiens GDP-mannose     | 0.00757118 | 0.03556468 | 1.11668474 |
| PRR5        | NM_00101753 | PRR5         | 22 | Homo sapiens PP610; FLJ20    | 0.00756513 | 0.03556148 | 1.7492887  |
| TRIM5       | NM_033092.1 | TRIM5        | 11 | Homo sapiens RNF88; TRIM5    | 0.00757241 | 0.03555786 | 1.40250119 |
| C2orf15     | NM_144706.2 | C2ORF15      | 2  | Homo sapiens MGC29762        | 0.0075104  | 0.03534181 | 4.50433643 |
| IFI27L2     | NM_032036.2 | IFI27L2      | 14 | Homo sapiens TLH29; MGC4     | 0.00750311 | 0.03532005 | 1.15227506 |
| GPATCH8     | NM_00100290 | GPATCH8      | 17 | Homo sapiens GPATC8; KIAA    | 0.00750004 | 0.03531815 | 27.8036274 |
| BCOR        | NM_017745.4 | BCOR         |    | Homo sapiens MGC131961; I    | 0.00747853 | 0.03525442 | 1.22829333 |

0.5 Upreg

|           |             |           |    |                               |            |            |            |
|-----------|-------------|-----------|----|-------------------------------|------------|------------|------------|
| PPP1R13L  | NM_006663.2 | PPP1R13L  | 19 | Homo sapiens IASPP; RAI; iA   | 0.00746666 | 0.03523604 | 1.271619   |
| MGEA5     | NM_012215.1 | MGEA5     | 10 | Homo sapiens MEA5; FLJ233     | 0.00743798 | 0.03515074 | 1.06015632 |
| C2orf44   | NM_025203.1 | C2ORF44   | 2  | Homo sapiens FLJ21945; PP     | 0.00738307 | 0.03497852 | 1.11426863 |
| LOC728686 | XR_038523.1 | LOC728686 |    | PREDICTED: Homo sapiens n     | 0.00732633 | 0.03474699 | 1.4383179  |
| RELL2     | NM_173828.3 | RELL2     | 5  | Homo sapiens RELL2; FLJ905    | 0.00731454 | 0.03470347 | 2.05772738 |
| SLC25A21  | NM_030631.1 | SLC25A21  | 14 | Homo sapiens MGC126570; C     | 0.00728778 | 0.0346137  | 2.08001347 |
| GOLGA8G   | NM_00101242 | GOLGA8G   | 15 | Homo sapiens DKFZp434K05      | 0.0072742  | 0.03456156 | 1.50844244 |
|           | Hs.565550   | HS.565550 | 2  | UI-H-CO0-aqr-d-03-0-UI.s1 l   | 0.00724916 | 0.03449206 | 1.86876773 |
| SNORA14B  | NR_002956.1 | SNORA14B  | 1  | Homo sapiens ACA14b           | 0.00722606 | 0.03440682 | 4.79028361 |
| BICD2     | NM_00100380 | BICD2     | 9  | Homo sapiens bA526D8.1; K     | 0.00722618 | 0.03439508 | 1.25530086 |
| SV2B      | NM_014848.2 | SV2B      | 15 | Homo sapiens HsT19680; KI     | 0.00720269 | 0.03434493 | 1.74989252 |
| TNFRSF25  | NM_148973.1 | TNFRSF25  | 1  | Homo sapiens WSL-LR; TNFR     | 0.00720285 | 0.0343333  | 1.26103787 |
| NEK6      | NM_014397.3 | NEK6      | 9  | Homo sapiens SID6-1512        | 0.00718882 | 0.0343158  | 1.2759933  |
| GRAMD4    | NM_015124.2 | GRAMD4    | 22 | Homo sapiens KIAA0767; MC     | 0.00716938 | 0.0342724  | 1.46658714 |
| OSBPL10   | NM_017784.3 | OSBPL10   | 3  | Homo sapiens ORP10; FLJ20     | 0.00717002 | 0.03426307 | 1.18613786 |
|           | Hs.531457   | HS.531457 | 9  | Homo sapiens cDNA FLJ3759     | 0.00713888 | 0.03415121 | 1.17747421 |
| ARHGEF18  | NM_015318.2 | ARHGEF18  | 19 | Homo sapiens KIAA0521; MC     | 0.00713126 | 0.0341394  | 1.09146636 |
| ABHD12    | NM_00104247 | ABHD12    | 20 | Homo sapiens DKFZP434P10      | 0.00712827 | 0.03413742 | 1.40501039 |
| MAOA      | NM_000240.2 | MAOA      |    | Homo sapiens monoamine ox     | 0.00711224 | 0.03409762 | 1.22151018 |
| LHX2      | NM_004789.3 | LHX2      | 9  | Homo sapiens LHX2; hLhx2; N   | 0.00708712 | 0.03400176 | 1.14848047 |
|           | Hs.552957   | HS.552957 | 16 | hd40e02.x1 Soares_NFL_T_C     | 0.00708889 | 0.03399793 | 14.3890183 |
| CDK2AP2   | NM_005851.3 | CDK2AP2   | 11 | Homo sapiens p14; FLJ1063f    | 0.00703915 | 0.03380832 | 1.29122095 |
| HEXDC     | NM_173620.1 | HEXDC     | 17 | Homo sapiens FLJ23825         | 0.00702963 | 0.03378706 | 1.37293798 |
| LOC644571 | XM_927686.1 | LOC644571 | 7  | PREDICTED: Homo sapiens h     | 0.00702999 | 0.03377656 | 2.61383503 |
| SCAND1    | NM_033630.1 | SCAND1    | 20 | Homo sapiens RAZ1; SDP1       | 0.00688966 | 0.03324695 | 1.16121191 |
|           | Hs.537217   | HS.537217 | 14 | Homo sapiens mRNA for IgE     | 0.00687742 | 0.03319997 | 3.65880544 |
| AHCY      | NM_000687.1 | AHCY      | 20 | Homo sapiens SAHH             | 0.00686665 | 0.03315932 | 1.04076772 |
| H1FX      | NM_006026.2 | H1FX      | 3  | Homo sapiens MGC8350; H1      | 0.00685548 | 0.03313025 | 1.13973548 |
| TPP1      | NM_000391.2 | TPP1      | 11 | Homo sapiens MGC21297; LF     | 0.0068525  | 0.03312793 | 1.10342799 |
| CCNI      | NM_006835.2 | CCNI      | 4  | Homo sapiens CYC1; CYI        | 0.00684944 | 0.03312519 | 1.05004233 |
| NFKBIE    | NM_004556.2 | NFKBIE    | 6  | Homo sapiens IKBE             | 0.00684149 | 0.03309884 | 5.82389882 |
| EML3      | NM_153265.1 | EML3      | 11 | Homo sapiens MGC111422; I     | 0.00682403 | 0.03305055 | 1.08809452 |
| NXN       | NM_022463.3 | NXN       | 17 | Homo sapiens TRG-4; FLJ12f    | 0.00682761 | 0.03304376 | 1.08422638 |
|           | Hs.552896   | HS.552896 | 11 | Homo sapiens cDNA FLJ4349     | 0.00677217 | 0.03288346 | 1.72484503 |
| LOC653506 | XM_927769.1 | LOC653506 | 17 | PREDICTED: Homo sapiens s     | 0.00673869 | 0.03275692 | 1.08179116 |
| LOC151457 | XR_038833.1 | LOC151457 |    | PREDICTED: Homo sapiens n     | 0.00673892 | 0.03274603 | 2.04968519 |
| CCDC128   | NM_152994.2 | CCDC128   | 2  | Homo sapiens MGC111781; I     | 0.00672636 | 0.03270894 | 1.23345409 |
| NDUFA2    | NM_002488.3 | NDUFA2    | 5  | Homo sapiens B8; CD14         | 0.00672233 | 0.03270606 | 1.05733223 |
| AMZ2      | NM_016627.4 | AMZ2      | 17 | Homo sapiens archaealysin fai | 0.00670899 | 0.03268446 | 1.07346073 |
| C12orf44  | NM_021934.3 | C12ORF44  | 12 | Homo sapiens FLJ11773         | 0.00671611 | 0.0326831  | 1.10468192 |
| PEX16     | NM_004813.1 | PEX16     | 11 | Homo sapiens peroxisomal bi   | 0.00667146 | 0.03253748 | 1.28638848 |
| C17orf28  | NM_030630.1 | C17ORF28  | 17 | Homo sapiens FLJ43526; DM     | 0.00666344 | 0.03253426 | 1.9312996  |
| ACADVL    | NM_000018.2 | ACADVL    | 17 | Homo sapiens ACAD6; VLCAI     | 0.00666044 | 0.0325316  | 1.08826547 |
| NKX3-1    | NM_006167.2 | NKX3-1    | 8  | Homo sapiens NKX3A; BAPX;     | 0.00664853 | 0.03249741 | 1.20753125 |
| NHEDC2    | XM_933390.1 | NHEDC2    | 4  | Homo sapiens FLJ23984; NH     | 0.00664939 | 0.03248962 | 2.0442812  |
| OR7E156P  | NR_002171.1 | OR7E156P  | 13 | Homo sapiens olfactory rece   | 0.0066328  | 0.03248037 | 4.74121057 |
| PLAT      | NM_000930.2 | PLAT      | 8  | Homo sapiens T-PA; DKFZp6     | 0.00662717 | 0.03247679 | 6.55527709 |
| GNAI2     | NM_002070.2 | GNAI2     | 3  | Homo sapiens H_LUCA16.1;      | 0.00663377 | 0.03247315 | 1.09539966 |
| MIR607    | NR_030338.1 | MIR607    |    | Homo sapiens microRNA 607     | 0.00660263 | 0.03240449 | 2.07366556 |
| RPL13L    | NR_002803.1 | RPL13L    | 12 | Homo sapiens RRPL13L          | 0.00658658 | 0.03243965 | 1.08644017 |
|           | Hs.444939   | HS.444939 | 1  | AV744922 CB Homo sapiens      | 0.0065796  | 0.03232732 | 1.83146209 |
| DAG1      | NM_004393.1 | DAG1      | 3  | Homo sapiens AGRNR; 156D.     | 0.00655405 | 0.03226159 | 1.1184523  |
| CCND3     | NM_001760.2 | CCND3     | 6  | Homo sapiens cyclin D3 (CCN   | 0.00654196 | 0.03223798 | 1.07090367 |
| ATP6V1A   | NM_001690.2 | ATP6V1A   | 3  | Homo sapiens VA68; Vma1;      | 0.0065422  | 0.0322272  | 1.07805329 |
| C3orf41   | XM_934359.1 | C3ORF41   | 3  | PREDICTED: Homo sapiens c     | 0.00653422 | 0.03222381 | 3.48259019 |
| NSD1      | NM_022455.3 | NSD1      | 5  | Homo sapiens DKFZp666C16      | 0.00650295 | 0.03208155 | 2.51797463 |
| C9orf5    | NM_032012.1 | C9ORF5    | 9  | Homo sapiens CG2; FLJ3322     | 0.00649924 | 0.03207519 | 1.14145819 |
| TMEM99    | Hs.562720   | TMEM99    | 17 | Homo sapiens MGC21518         | 0.00647245 | 0.03199061 | 1.11988588 |
| MORN4     | NM_178832.2 | MORN4     | 10 | Homo sapiens bA548K23.4; I    | 0.00641486 | 0.03176519 | 3.00168135 |
| APPBP2    | NM_006380.2 | APPBP2    | 17 | Homo sapiens PAT1; KIAA02     | 0.0063556  | 0.03151881 | 1.14310429 |
| ZFAND6    | NM_019006.2 | ZFAND6    | 15 | Homo sapiens ZA20D3; AWP      | 0.00633297 | 0.03144191 | 1.18283852 |
| TMX4      | NM_021156.2 | TMX4      | 20 | Homo sapiens DJ971N18.2; I    | 0.00625254 | 0.03114755 | 5.69308177 |
| MAD2L2    | NM_006341.2 | MAD2L2    | 1  | Homo sapiens REV7; MAD2B      | 0.00625377 | 0.03114198 | 1.05554992 |
| LOC729776 | Hs.535844   | LOC729776 | 6  | PREDICTED: Homo sapiens h     | 0.00623598 | 0.03108845 | 1.52991312 |
|           | Hs.521268   | HS.521268 | 7  | UI-E-DW0-agh-n-18-0-UI.s1     | 0.00620286 | 0.03098159 | 5.22192514 |
| LOC642072 | XM_936152.1 | LOC642072 |    | PREDICTED: Homo sapiens s     | 0.00618999 | 0.03092896 | 1.79097841 |
| HDAC3     | NM_003883.2 | HDAC3     | 5  | Homo sapiens RPD3; HD3; R     | 0.00616308 | 0.03082936 | 1.08043731 |
| FOXA1     | NM_004496.2 | FOXA1     | 14 | Homo sapiens MGC33105; T      | 0.0061398  | 0.03072451 | 11.9943146 |
| BIRC2     | NM_001166.3 | BIRC2     | 11 | Homo sapiens API1; Hiap-2;    | 0.00612247 | 0.03067251 | 1.16643391 |
| FAM46A    | NM_017633.1 | FAM46A    | 6  | Homo sapiens XTP11; C6orf3    | 0.0061243  | 0.03067007 | 1.08786644 |

0.5 Upreg

|             |                          |                                  |            |            |            |
|-------------|--------------------------|----------------------------------|------------|------------|------------|
| TBC1D7      | NM_016495.2 TBC1D7       | 6 Homo sapiens DKFZp686N23       | 0.00611667 | 0.03065503 | 1.24460786 |
| SURF1       | NM_003172.2 SURF1        | 9 Homo sapiens surfeit 1 (SUR    | 0.00610512 | 0.03060873 | 1.13566395 |
| C1orf115    | NM_024709.2 C1ORF115     | 1 Homo sapiens FLJ14146; RP:     | 0.00608804 | 0.03054621 | 1.14775125 |
| TTC15       | NM_016030.5 TTC15        | 2 Homo sapiens FLJ36862; CG      | 0.00602732 | 0.03025298 | 1.24734342 |
| TRIB1       | NM_025195.2 TRIB1        | 8 Homo sapiens GIG2; SKIP1;      | 0.00595385 | 0.0299864  | 1.05144393 |
| AIF1L       | NM_031426.2 AIF1L        | 9 Homo sapiens MGC29466; FI      | 0.0059549  | 0.02998029 | 1.05991108 |
| TRIM66      | NM_014818.1 TRIM66       | 11 Homo sapiens tripartite motil | 0.00591142 | 0.02980671 | 1.26703324 |
| LOC727884   | XR_037459.1 LOC727884    | PREDICTED: Homo sapiens n        | 0.00589097 | 0.0297149  | 1.61602413 |
| TMOD1       | NM_003275.1 TMOD1        | 9 Homo sapiens ETMOD; D9S5       | 0.00588101 | 0.02969854 | 3.04923983 |
| FNDC3B      | NM_00113509 FNDC3B       | 3 Homo sapiens fibronectin typ   | 0.00588136 | 0.02968898 | 1.12830578 |
| DHX40       | XM_942276.1 DHX40        | PREDICTED: Homo sapiens C        | 0.00586027 | 0.02963897 | 1.12665428 |
| NTAN1       | NM_173474.2 NTAN1        | 16 Homo sapiens DKFZp666E05      | 0.00584956 | 0.02963001 | 1.19082666 |
| LOC401676   | XR_037812.1 LOC401676    | PREDICTED: Homo sapiens n        | 0.00584723 | 0.02962954 | 1.1556875  |
| PCOLCE      | NM_002593.2 PCOLCE       | 7 Homo sapiens PCPE              | 0.00585067 | 0.02962431 | 6.94613458 |
| PTPRU       | NM_005704.3 PTPRU        | 1 Homo sapiens GLEPP1; hPTP      | 0.00584331 | 0.02962102 | 1.41284773 |
| LOC10012881 | XM_00173286 LOC100128816 | PREDICTED: Homo sapiens A        | 0.00582676 | 0.0295597  | 1.85446607 |
| IFNGR1      | NM_000416.1 IFNGR1       | 6 Homo sapiens CD119; IFNGF      | 0.00581985 | 0.02953595 | 1.10415379 |
|             | Hs.572219 HS.572219      | CM3-MT0357-260101-690-b:         | 0.0058081  | 0.02949891 | 1.2380611  |
| ITGA5       | NM_002205.2 ITGA5        | 12 Homo sapiens CD49e; VLA5A     | 0.00577367 | 0.02936904 | 1.19737849 |
|             | Hs.27048 HS.27048        | 12 Homo sapiens cDNA FLJ3175     | 0.00577395 | 0.02935922 | 1.21702779 |
| HYOU1       | NM_006389.2 HYOU1        | 11 Homo sapiens DKFZp686N08      | 0.0057444  | 0.02925383 | 1.13044603 |
| CAP1        | NM_006367.2 CAP1         | 1 Homo sapiens CAP1-PEN; CA      | 0.00574623 | 0.02925195 | 1.04582882 |
| LOC145814   | XM_927974.1 LOC145814    | 15 PREDICTED: Homo sapiens h     | 0.00573859 | 0.02923549 | 4.33178375 |
| KLF4        | NM_004235.3 KLF4         | 9 Homo sapiens KGLF; EZF         | 0.00571816 | 0.02915384 | 1.24985026 |
| LAMA2       | NM_000426.3 LAMA2        | 6 Homo sapiens LAMM              | 0.00570019 | 0.02909578 | 1.80059471 |
| LRRC49      | NM_017691.2 LRRC49       | 15 Homo sapiens FLJ20156         | 0.00568551 | 0.02906562 | 10.3142248 |
| PRKCA       | NM_002737.2 PRKCA        | 17 Homo sapiens MGC129901; I     | 0.00566579 | 0.02902074 | 1.14027436 |
| LAPTM4A     | NM_014713.3 LAPTM4A      | 2 Homo sapiens LAPTM4; KIAA      | 0.00566899 | 0.02901473 | 1.16322376 |
| LOC730432   | XM_936257.1 LOC730432    | PREDICTED: Homo sapiens s        | 0.00564338 | 0.02897315 | 1.09768492 |
| LOC91948    | XM_378549.3 LOC91948     | PREDICTED: Homo sapiens h        | 0.00564065 | 0.02897035 | 3.11836817 |
| SLC25A44    | NM_014655.1 SLC25A44     | 1 Homo sapiens FLJ90431; KIA     | 0.00562285 | 0.02892375 | 1.20297231 |
| MTAP        | NM_002451.3 MTAP         | 9 Homo sapiens c86fus; MSAP      | 0.00560614 | 0.02889387 | 1.09457458 |
| LOC729885   | XR_015687.2 LOC729885    | 19 PREDICTED: Homo sapiens n     | 0.00558586 | 0.02885664 | 1.5552479  |
| LOC283874   | NM_00101273 LOC283874    | 16 Homo sapiens FLJ20393         | 0.00557276 | 0.02883393 | 2.42663586 |
| SNHG9       | NR_003142.2 SNHG9        | 16 Homo sapiens DKFZp686N06      | 0.00553903 | 0.02868177 | 1.06280952 |
| ABCG4       | NM_022169.3 ABCG4        | 11 Homo sapiens WHITE2           | 0.00552901 | 0.02867469 | 1.53833437 |
| ATG4A       | NM_178271.3 ATG4A        | Homo sapiens APG4A; AULTL        | 0.0055331  | 0.0286735  | 1.80902633 |
| GSR         | NM_000637.2 GSR          | 8 Homo sapiens MGC78522          | 0.00550813 | 0.02858877 | 1.24918367 |
| DDB2        | NM_000107.1 DDB2         | 11 Homo sapiens FLJ34321         | 0.00549634 | 0.02854998 | 1.27987752 |
| REP15       | NM_00102987 REP15        | 12 Homo sapiens RAB15 effecto    | 0.00547879 | 0.02848111 | 3.51592981 |
| ATP6V1D     | NM_015994.2 ATP6V1D      | 14 Homo sapiens ATP6M; VATD;     | 0.00547325 | 0.02846349 | 1.07924337 |
| LAMC3       | NM_006059.2 LAMC3        | 9 Homo sapiens DKFZp434E20       | 0.00542419 | 0.02825268 | 1.40940255 |
| PPDPF       | NM_024299.2 PPDPF        | 20 Homo sapiens dj697K14.9; F    | 0.00541146 | 0.02820855 | 1.20437067 |
| LOC643336   | XM_00171856 LOC643336    | PREDICTED: Homo sapiens s        | 0.00535891 | 0.02800069 | 1.11946779 |
| RNF114      | NM_018683.3 RNF114       | 20 Homo sapiens RNF114           | 0.00535425 | 0.02799842 | 1.0836821  |
| TALDO1      | XM_938697.1 TALDO1       | PREDICTED: Homo sapiens ti       | 0.00534243 | 0.02795862 | 1.05914101 |
| COMMD3      | NM_012071.2 COMMD3       | 10 Homo sapiens C10orf8; DKFZ    | 0.00532457 | 0.02787621 | 1.06350458 |
| TMEM63B     | NM_018426.1 TMEM63B      | 6 Homo sapiens DKFZp686N22       | 0.00527222 | 0.02766766 | 1.2415137  |
| LOC732371   | XM_941758.1 LOC732371    | PREDICTED: Homo sapiens s        | 0.00527537 | 0.02766228 | 2.06444637 |
| RTF1        | NM_015138.3 RTF1         | 15 Homo sapiens KIAA0252; GT     | 0.0052654  | 0.02765379 | 1.53177691 |
| LLGL1       | NM_004140.3 LLGL1        | 17 Homo sapiens HUGL; LLGL; I    | 0.00525481 | 0.02762006 | 1.14295318 |
| LOC10013119 | XR_038314.1 LOC100131196 | PREDICTED: Homo sapiens n        | 0.00524166 | 0.02756185 | 1.03824935 |
| GTF2B       | NM_001514.3 GTF2B        | 1 Homo sapiens TFIIB; TF2B       | 0.00519023 | 0.02735654 | 1.12870198 |
| LOC728499   | XM_928299.1 LOC728499    | 5 PREDICTED: Homo sapiens s      | 0.00518213 | 0.02734645 | 1.14783366 |
| CDH3        | NM_001793.3 CDH3         | 16 Homo sapiens HJMD; PCAD;      | 0.0051662  | 0.02728411 | 1.09391014 |
| METTL2B     | NM_018396.1 METTL2B      | 7 Homo sapiens METL; METTL2      | 0.00510012 | 0.02699967 | 1.93288314 |
| PHTF1       | NM_006608.1 PHTF1        | 1 Homo sapiens PHTF              | 0.00506024 | 0.02687443 | 1.30002279 |
| ATP6V1C1    | NM_001695.3 ATP6V1C1     | 8 Homo sapiens VAGC; FLJ200!     | 0.00505557 | 0.02686036 | 1.54388725 |
| NR4A2       | NM_006186.2 NR4A2        | 2 Homo sapiens RNR1; NOT; T.     | 0.00504375 | 0.02680831 | 1.15462605 |
| C5orf32     | NM_032412.2 C5ORF32      | 5 Homo sapiens ORF1-FL49         | 0.00497418 | 0.026481   | 1.13529172 |
| NPAL3       | NM_020448.2 NPAL3        | 1 Homo sapiens RP3-462O23.3      | 0.00496198 | 0.02643731 | 1.69624509 |
| LOC649864   | XM_941341.1 LOC649864    | PREDICTED: Homo sapiens s        | 0.00492606 | 0.02626704 | 44.6575295 |
| LOC441019   | XM_498969.2 LOC441019    | 4 PREDICTED: Homo sapiens h      | 0.00492187 | 0.02625526 | 1.34950201 |
| CNR1        | NM_016083.3 CNR1         | 6 Homo sapiens CNR; CANN6;       | 0.0049046  | 0.02617367 | 1.99876644 |
| STOM        | NM_004099.4 STOM         | 9 Homo sapiens EPB7; EPB72;      | 0.00489563 | 0.02614686 | 1.18496348 |
| TBC1D9      | NM_015130.1 TBC1D9       | 4 Homo sapiens KIAA0882; MC      | 0.00488719 | 0.0261439  | 1.7905953  |
| PMS2L4      | NR_022007.1 PMS2L4       | 7 Homo sapiens postmeiotic se    | 0.00489102 | 0.02614327 | 1.28467802 |
|             | Hs.574587 HS.574587      | 19 DA863698 PLACE7 Homo sa       | 0.00489642 | 0.02614051 | 2.62484982 |
| KLHL24      | NM_017644.3 KLHL24       | 3 Homo sapiens FLJ25796; KR.     | 0.00487312 | 0.02611078 | 1.32508904 |
| HERC6       | NM_00101300 HERC6        | 4 Homo sapiens FLJ20637          | 0.00486872 | 0.0261083  | 5.29951069 |

0.5 Upreg

|             |             |              |    |                              |            |            |            |
|-------------|-------------|--------------|----|------------------------------|------------|------------|------------|
| DCAF6       | NM_00101797 | DCAF6        | 1  | Homo sapiens RP4-745I14.1    | 0.0048704  | 0.02610674 | 1.1304873  |
| PMVK        | NM_006556.2 | PMVK         | 1  | Homo sapiens PMKASE; HUM     | 0.004864   | 0.02609353 | 1.32207854 |
| LOC441876   | XM_946278.1 | LOC441876    | 1  | PREDICTED: Homo sapiens s    | 0.00485129 | 0.02605703 | 1.13179233 |
| KDELR3      | NM_016657.1 | KDELR3       | 22 | Homo sapiens ERD2L3          | 0.00483766 | 0.02601545 | 1.14874766 |
| SPATA20     | NM_022827.2 | SPATA20      | 17 | Homo sapiens MGC111032; I    | 0.00483812 | 0.02600733 | 1.21414682 |
| ESPN        | NM_031475.1 | ESPN         | 1  | Homo sapiens DKFZP434A19     | 0.00481646 | 0.02593298 | 1.21598707 |
| SULT1A3     | NM_177552.2 | SULT1A3      | 16 | Homo sapiens MGC117469; I    | 0.00480977 | 0.025918   | 1.25672351 |
| LOC10013357 | XM_00171453 | LOC100133578 |    | PREDICTED: Homo sapiens s    | 0.00480396 | 0.02589725 | 1.45220124 |
| LQK1        | XR_041452.1 | LQK1         | 1  | PREDICTED: Homo sapiens n    | 0.00475813 | 0.02570241 | 1.39699096 |
| HYDIN       | NM_017558.2 | HYDIN        | 16 | Homo sapiens FLJ14665; KIA   | 0.00471586 | 0.02554696 | 1.28859723 |
| FRYL        | XM_945291.1 | FRYL         | 4  | Homo sapiens FLJ16177; KIA   | 0.00471767 | 0.02554633 | 3.19313092 |
| PCBP4       | NM_033009.1 | PCBP4        | 3  | Homo sapiens LIP4; MCG10     | 0.00469604 | 0.02548127 | 4.22274983 |
| LOC646825   | XM_929783.1 | LOC646825    | 19 | PREDICTED: Homo sapiens s    | 0.00469619 | 0.02547162 | 2.647871   |
| KCNMB4      | NM_014505.4 | KCNMB4       | 12 | Homo sapiens potassium larc  | 0.00468186 | 0.02541471 | 1.53879654 |
| TBC1D8      | NM_007063.2 | TBC1D8       |    | Homo sapiens AD3; VRP; HB    | 0.0046762  | 0.02539442 | 1.31270482 |
| TSPAN33     | NM_178562.2 | TSPAN33      | 7  | Homo sapiens MGC50844; PI    | 0.00465846 | 0.02536041 | 1.37865609 |
| TAF6        | NM_139122.1 | TAF6         | 7  | Homo sapiens MGC:8964; DI    | 0.0046618  | 0.02535772 | 2.76380792 |
| B9D2        | NM_030578.2 | B9D2         | 19 | Homo sapiens MGC4093; ICI    | 0.0046637  | 0.02535767 | 1.55451677 |
| GABRG2      | NM_198904.1 | GABRG2       | 5  | Homo sapiens ECA2; GEFSP3    | 0.00463117 | 0.02526371 | 2.30326563 |
| MRPL2       | NM_015950.3 | MRPL2        | 6  | Homo sapiens C8-22; RPML     | 0.00460372 | 0.02516573 | 1.08134519 |
| SCHIP1      | NM_014575.1 | SCHIP1       | 3  | Homo sapiens FLJ39160; SCI   | 0.00457607 | 0.02507665 | 4.07613214 |
| TMEM145     | NM_173633.1 | TMEM145      | 19 | Homo sapiens FLJ90805        | 0.004577   | 0.02507134 | 1.44147435 |
| LOC650257   | XM_944121.1 | LOC650257    |    | PREDICTED: Homo sapiens h    | 0.00456966 | 0.02505189 | 2.00661387 |
| TMCO1       | NM_019026.2 | TMCO1        | 1  | Homo sapiens HP10122; TMC    | 0.00455087 | 0.02497985 | 1.06394072 |
| NSFL1C      | NM_182483.1 | NSFL1C       | 20 | Homo sapiens UBXD10; p47;    | 0.0045183  | 0.02486283 | 1.18221204 |
| LOC652900   | XM_00172491 | LOC652900    |    | PREDICTED: Homo sapiens s    | 0.00451545 | 0.0248575  | 2.02285083 |
| CARHSP1     | NM_014316.1 | CARHSP1      | 16 | Homo sapiens CSDC1; MGC1     | 0.00451898 | 0.02485624 | 1.11427171 |
| JUNB        | NM_002229.2 | JUNB         | 19 | Homo sapiens jun B proto-or  | 0.00451137 | 0.02484536 | 1.28797363 |
| EGFL7       | NM_016215.3 | EGFL7        | 9  | Homo sapiens RP11-251M1.2    | 0.00449585 | 0.02478047 | 6.09646519 |
| FKBP1A      | NM_000801.2 | FKBP1A       | 20 | Homo sapiens PKCI2; FKBP1.   | 0.00449063 | 0.02477228 | 1.10491917 |
| CCDC45      | NM_138363.1 | CCDC45       | 17 | Homo sapiens DKFZp667E18     | 0.00449085 | 0.02476317 | 1.15149741 |
| ZBTB4       | NM_020899.2 | ZBTB4        | 17 | Homo sapiens KAISO-L1; KIA   | 0.00448075 | 0.02472805 | 1.20468628 |
| TANC1       | NM_033394.1 | TANC1        | 2  | Homo sapiens ROLSB; TANC;    | 0.00445568 | 0.02464102 | 1.17481645 |
|             | Hs.554169   | HS.554169    | 18 | RST33611 Athersys RAGE Lit   | 0.00444252 | 0.0246196  | 1.73161851 |
| PSMD4       | NM_153822.1 | PSMD4        | 1  | Homo sapiens pUB-R5; Rpn1    | 0.00444282 | 0.02461095 | 1.08004249 |
| LIFR        | NM_002310.3 | LIFR         | 5  | Homo sapiens CD118; STWS     | 0.00442398 | 0.0245682  | 4.79958169 |
| DAD1        | NM_001344.1 | DAD1         | 14 | Homo sapiens OST2            | 0.0044285  | 0.02455217 | 1.04756449 |
| SLMO2       | NM_016045.2 | SLMO2        | 20 | Homo sapiens C20orf45; PRE   | 0.00441245 | 0.02453498 | 339.202669 |
| LOC650755   | XM_939838.1 | LOC650755    |    | PREDICTED: Homo sapiens s    | 0.00441245 | 0.02452472 | 3.66803718 |
| SPPL2A      | NM_032802.2 | SPPL2A       | 15 | Homo sapiens PSL2; IMP3      | 0.00439456 | 0.02449717 | 1.11104667 |
| CSAD        | NM_015989.3 | CSAD         | 12 | Homo sapiens PCAP; MGC11'    | 0.00439216 | 0.02449411 | 1.52548338 |
| LOC730323   | XM_00172209 | LOC730323    |    | 7 PREDICTED: Homo sapiens h  | 0.00435765 | 0.02437343 | 2.47528934 |
| RRM2B       | NM_015713.3 | RRM2B        | 8  | Homo sapiens DKFZp686M05     | 0.00435335 | 0.02435963 | 1.24210331 |
| PDCD6IP     | NM_013374.3 | PDCD6IP      | 3  | Homo sapiens MGC17003; AI    | 0.00435001 | 0.02435123 | 1.2278777  |
| LOC729580   | XM_00113070 | LOC729580    |    | 20 PREDICTED: Homo sapiens h | 0.00434316 | 0.02432319 | 1.7295702  |
| DOK4        | NM_018110.2 | DOK4         | 16 | Homo sapiens FLJ10488        | 0.00431812 | 0.0242034  | 3.32259632 |
| UBXN6       | NM_025241.1 | UBXN6        | 19 | Homo sapiens DKFZp667D10     | 0.00431522 | 0.02419734 | 1.18804706 |
| AMD1        | NM_00103305 | AMD1         | 6  | Homo sapiens ADOMETDC; A     | 0.00430256 | 0.02414677 | 1.09461241 |
| FLJ10986    | NM_018291.2 | FLJ10986     | 1  | Homo sapiens RP11-242B9.1    | 0.00429344 | 0.02411602 | 1.63907728 |
| CXADR       | NM_001338.3 | CXADR        | 21 | Homo sapiens CAR; HCAR       | 0.0042642  | 0.02397211 | 1.16189807 |
| DCTN3       | NM_024348.2 | DCTN3        | 9  | Homo sapiens MGC111190; I    | 0.00425417 | 0.02393605 | 1.13882531 |
| SBF1        | NM_002972.1 | SBF1         | 22 | Homo sapiens DKFZp761D04     | 0.00424821 | 0.02393295 | 1.11347162 |
| MICA        | NM_000247.1 | MICA         | 6  | Homo sapiens PERB11.1; MG    | 0.00422728 | 0.02383533 | 1.37812011 |
| ZNF197      | NM_00102485 | ZNF197       | 3  | Homo sapiens P18; ZNF20; Z   | 0.00419964 | 0.02369965 | 3.22409953 |
| LOC652185   | XM_941547.1 | LOC652185    |    | PREDICTED: Homo sapiens s    | 0.00419492 | 0.02368306 | 4.57943376 |
| NCBP2       | NM_007362.3 | NCBP2        | 3  | Homo sapiens PIG55; CBP20    | 0.00417602 | 0.023657   | 1.07857842 |
| ZNF75A      | NM_153028.1 | ZNF75A       | 16 | Homo sapiens FLJ31529        | 0.00418636 | 0.0236549  | 6.07962001 |
| PLCD3       | NM_133373.2 | PLCD3        | 17 | Homo sapiens MGC71172        | 0.00417669 | 0.02365067 | 1.96811438 |
| MST1        | NM_020998.2 | MST1         | 3  | Homo sapiens HGFL; NF15S2    | 0.00417738 | 0.02364448 | 1.22546819 |
| UBE4A       | NM_004788.2 | UBE4A        | 11 | Homo sapiens UFD2; KIAA01    | 0.00418018 | 0.02363004 | 1.11062454 |
| PDK3        | NM_005391.1 | PDK3         |    | Homo sapiens pyruvate dehy   | 0.00416139 | 0.02360433 | 1.93795619 |
| ADIPOR2     | NM_024551.2 | ADIPOR2      | 12 | Homo sapiens MGC4640; ACI    | 0.00415694 | 0.0235892  | 1.07223428 |
| NME7        | NM_013330.3 | NME7         | 1  | Homo sapiens nm23-H7; FLJ    | 0.00415371 | 0.02358097 | 1.18237421 |
| PAPSS1      | NM_005443.4 | PAPSS1       | 4  | Homo sapiens SK1; PAPSS; I   | 0.00415091 | 0.02357517 | 1.09266126 |
| FOXD4L1     | NM_012184.3 | FOXD4L1      | 2  | Homo sapiens bA395L14.1      | 0.00414909 | 0.02357496 | 1.88736539 |
| NUCB1       | NM_006184.3 | NUCB1        | 19 | Homo sapiens DKFZp686A15     | 0.00414406 | 0.02355649 | 1.06904679 |
| CHSY1       | NM_014918.3 | CHSY1        | 15 | Homo sapiens CSS1; KIAA09    | 0.00411326 | 0.02339138 | 1.082658   |
| GMFB        | NM_004124.2 | GMFB         | 14 | Homo sapiens GMF             | 0.00409942 | 0.02333271 | 1.09952115 |
| LOC643201   | XM_932165.1 | LOC643201    |    | 5 PREDICTED: Homo sapiens h  | 0.00408736 | 0.02327405 | 1.53327973 |
| RAB8B       | NM_016530.2 | RAB8B        | 15 | Homo sapiens FLJ38125        | 0.00408431 | 0.02326669 | 1.27142901 |

## 0.5 Upreg

|             |             |             |    |                              |            |            |            |
|-------------|-------------|-------------|----|------------------------------|------------|------------|------------|
| EPHX2       | NM_001979.4 | EPHX2       | 8  | Homo sapiens SEH; CEH        | 0.00407884 | 0.0232455  | 1.17730645 |
| TRIM2       | NM_015271.2 | TRIM2       | 4  | Homo sapiens KIAA0517; RN    | 0.00406598 | 0.02320217 | 1.19437155 |
| SLC4A2      | NM_003040.2 | SLC4A2      | 7  | Homo sapiens HKB3; NBND3     | 0.00405415 | 0.02315457 | 1.12849511 |
| PCMT1       | NM_005389.1 | PCMT1       | 6  | Homo sapiens protein-L-isoas | 0.00404857 | 0.02314265 | 1.05100515 |
| C15orf39    | NM_015492.3 | C15ORF39    | 15 | Homo sapiens DKFZP434H13     | 0.0040435  | 0.02313365 | 1.38053793 |
| LOC653158   | XM_926814.1 | LOC653158   | 5  | PREDICTED: Homo sapiens s    | 0.00401322 | 0.02300009 | 2.30793039 |
| ZBTB48      | NM_005341.1 | ZBTB48      | 1  | Homo sapiens pp9964; HKR3    | 0.00399775 | 0.02295115 | 1.21000566 |
| AFTPH       | NM_017657.3 | AFTPH       | 2  | Homo sapiens MGC33965; FL    | 0.00398104 | 0.02290479 | 1.28936861 |
| FOXO3       | NM_001455.2 | FOXO3       | 6  | Homo sapiens FOXO2; FKHR1    | 0.00396401 | 0.02283658 | 1.14236824 |
| HERC1       | NM_003922.2 | HERC1       | 15 | Homo sapiens p619; p532      | 0.00395736 | 0.02280814 | 1.2707019  |
| FAM46C      | NM_017709.2 | FAM46C      | 1  | Homo sapiens FLJ20202        | 0.00395404 | 0.02279895 | 8.30910763 |
| MIR526A2    | NR_030208.1 | MIR526A2    |    | Homo sapiens microRNA 526    | 0.00394012 | 0.02277811 | 2.31856527 |
| WDR48       | NM_020839.2 | WDR48       | 3  | Homo sapiens P80; KIAA144    | 0.00393011 | 0.02273014 | 1.22052476 |
| LOC728453   | XM_00112730 | LOC728453   |    | PREDICTED: Homo sapiens s    | 0.00391325 | 0.02266233 | 1.06468175 |
| LOC442727   | XR_017503.2 | LOC442727   | 7  | PREDICTED: Homo sapiens n    | 0.00391106 | 0.02265953 | 1.0886016  |
| TBC1D16     | NM_019020.2 | TBC1D16     | 17 | Homo sapiens FLJ20748; MG    | 0.00389128 | 0.02255548 | 1.51735039 |
| PEPD        | NM_000285.1 | PEPD        | 19 | Homo sapiens PROLIDASE; M    | 0.00388004 | 0.02249948 | 1.0894296  |
| LONRF2      | Hs.21380    | LONRF2      | 2  | Homo sapiens MGC126711; I    | 0.00385901 | 0.02240694 | 4.34597497 |
| LANCL1      | NM_006055.1 | LANCL1      | 2  | Homo sapiens p40; GPR69A     | 0.00385407 | 0.02238803 | 1.08497261 |
| CCPG1       | NM_004748.3 | CCPG1       | 15 | Homo sapiens KIAA1254; CP    | 0.00384723 | 0.02235814 | 1.29366296 |
| EMR2        | NM_152916.1 | EMR2        | 19 | Homo sapiens CD312; DKFZ;    | 0.00384418 | 0.0223502  | 1.40955089 |
| MPP7        | NM_173496.2 | MPP7        | 10 | Homo sapiens FLJ32798; RP:   | 0.00383479 | 0.02232497 | 2.2036896  |
| BMPR2       | NM_001204.5 | BMPR2       | 2  | Homo sapiens BRK-3; BMPR3    | 0.00382011 | 0.02226884 | 2.08999614 |
| ARID3A      | NM_005224.1 | ARID3A      | 19 | Homo sapiens E2FBP1; BRIG    | 0.00380987 | 0.0222385  | 1.26008135 |
| CLPTM1      | NM_001294.1 | CLPTM1      | 19 | Homo sapiens clef lip and p  | 0.00381025 | 0.02223095 | 1.08607699 |
| LOC653438   | XM_929895.1 | LOC653438   | 1  | PREDICTED: Homo sapiens s    | 0.00380422 | 0.0222153  | 1.44652623 |
| UBE2E2      | NM_152653.1 | UBE2E2      | 3  | Homo sapiens UBCH8; FLJ25    | 0.00379371 | 0.02217347 | 1.20045921 |
| AMH         | NM_000479.2 | AMH         | 19 | Homo sapiens MIF; MIS        | 0.0037793  | 0.02213806 | 1.96314642 |
| WDHD1       | NM_00100839 | WDHD1       | 14 | Homo sapiens AND-1           | 0.00378262 | 0.02212814 | 3.54778717 |
| ALDH2       | NM_000690.2 | ALDH2       | 12 | Homo sapiens ALDM; ALDH-f    | 0.00376355 | 0.02206528 | 1.2221394  |
| ITGA3       | NM_002204.1 | ITGA3       | 17 | Homo sapiens GAP-B3; FLJ34   | 0.00373812 | 0.02195507 | 1.11818209 |
| TBC1D2B     | NM_015079.2 | TBC1D2B     | 15 | Homo sapiens KIAA1055; FL:   | 0.00373288 | 0.02194372 | 1.33632061 |
| SLC30A1     | NM_021194.2 | SLC30A1     | 1  | Homo sapiens ZNT1; ZRC1      | 0.00373118 | 0.02194343 | 1.52657164 |
| LOC10013279 | XR_036994.1 | LOC10013279 |    | PREDICTED: Homo sapiens n    | 0.00371922 | 0.02191201 | 1.20198156 |
| BMP4        | NM_001202.2 | BMP4        | 14 | Homo sapiens BMP2B1; BMP:    | 0.00371155 | 0.02189597 | 1.13302617 |
| NUMB        | NM_003744.5 | NUMB        | 14 | Homo sapiens S171            | 0.00371203 | 0.02188911 | 1.10289362 |
| TM4SF18     | NM_138786.1 | TM4SF18     | 5  | Homo sapiens cDNA FLJ3883    | 0.00369717 | 0.02185006 | 7.06810542 |
| CCS         | XM_938909.1 | CCS         | 3  | Homo sapiens L6D             | 0.00369294 | 0.02183479 | 24.2077768 |
| DDEF2       | NM_003887.1 | DDEF2       |    | PREDICTED: Homo sapiens c    | 0.00367771 | 0.02180311 | 1.6063742  |
| PPL         | NM_002705.3 | PPL         | 2  | Homo sapiens PAG3; Pap-alp   | 0.00366424 | 0.02180122 | 1.24863709 |
| WNT2B       | NM_024494.1 | WNT2B       | 16 | Homo sapiens MGC134872; I    | 0.00366058 | 0.02178925 | 1.28640266 |
| SPG11       | NM_025137.2 | SPG11       | 1  | Homo sapiens WNT13; XWN1     | 0.00364108 | 0.02169267 | 1.79791074 |
| ENTPD8      | NM_198585.1 | ENTPD8      | 15 | Homo sapiens KIAA1840; DK    | 0.00362759 | 0.02165122 | 1.16608979 |
| RPL15       | NM_002948.2 | RPL15       | 9  | Homo sapiens GLSR2492; UP    | 0.00362919 | 0.02165102 | 1.25892305 |
| CEBPA       | NM_004364.2 | CEBPA       | 3  | Homo sapiens RPL10; RPYL1    | 0.00361789 | 0.02163227 | 1.05627314 |
|             | Hs.14555    | HS.14555    | 19 | Homo sapiens CEBP; C/EBP-;   | 0.00358633 | 0.02148232 | 1.49890766 |
| U1SNRNPBP   | NM_180703.1 | U1SNRNPBP   | 10 | Homo sapiens cDNA: FLJ215    | 0.0035877  | 0.02148081 | 1.19143749 |
| CALB2       | NM_001740.2 | CALB2       | 12 | Homo sapiens MGC138160; I    | 0.0035843  | 0.02147989 | 1.65343811 |
| C6orf129    | NM_138493.1 | C6ORF129    | 16 | Homo sapiens CAL2            | 0.00357814 | 0.02146235 | 1.32229264 |
| PPP2R5A     | NM_006243.2 | PPP2R5A     | 6  | Homo sapiens HSPC265; MG     | 0.00357149 | 0.02143322 | 1.18033262 |
| SLC7A11     | NM_014331.2 | SLC7A11     | 1  | Homo sapiens MGC131915; I    | 0.0035419  | 0.02130281 | 1.27218093 |
| CPLX1       | NM_006651.3 | CPLX1       | 4  | Homo sapiens CCBP1; xCT      | 0.00352519 | 0.02122157 | 1.49839954 |
| C15orf21    | NM_00100526 | C15ORF21    | 4  | Homo sapiens CPX-1; CPX1     | 0.00350665 | 0.02113879 | 1.72260708 |
| TBC1D2      | NM_018421.2 | TBC1D2      | 15 | Homo sapiens D-PCa-2; FLJ3   | 0.00349748 | 0.02111231 | 1.37547373 |
| CDC42       | NM_044472.1 | CDC42       | 9  | Homo sapiens FLJ10702; DK    | 0.00349034 | 0.02109801 | 1.86003739 |
| GOT1        | NM_002079.1 | GOT1        | 1  | Homo sapiens CDC42Hs; G2!    | 0.00347502 | 0.02101497 | 1.16419603 |
| LOC642489   | XM_925989.1 | LOC642489   | 10 | Homo sapiens GIG18           | 0.00344998 | 0.02087309 | 1.06464249 |
| RNFT1       | NM_016125.2 | RNFT1       | 6  | PREDICTED: Homo sapiens s    | 0.0034418  | 0.02086167 | 1.07455901 |
| LOC401115   | XM_937968.1 | LOC401115   | 17 | Homo sapiens PTD016; MGC     | 0.00344246 | 0.02085612 | 1.67854665 |
| MTMR11      | NM_006697.1 | MTMR11      |    | PREDICTED: Homo sapiens h    | 0.00343871 | 0.02085249 | 1.05175894 |
| CST7        | NM_003650.2 | CST7        | 1  | Homo sapiens CRA; RP11-21    | 0.00341937 | 0.02076368 | 1.27298864 |
| SEZ6L2      | NM_201575.1 | SEZ6L2      | 20 | Homo sapiens CMAP            | 0.00341491 | 0.02074611 | 2.55096052 |
| TMEM118     | NM_032814.1 | TMEM118     |    | Homo sapiens FLJ90517; PSI   | 0.00341107 | 0.02074183 | 1.23308447 |
| SERPINB5    | NM_002639.2 | SERPINB5    |    | Homo sapiens FLJ14627        | 0.00340674 | 0.02073452 | 1.115284   |
| CPVL        | NM_031311.3 | CPVL        | 18 | Homo sapiens PI5; maspin     | 0.00337087 | 0.02054448 | 1.19741815 |
| MSRB2       | NM_012228.2 | MSRB2       | 7  | Homo sapiens HVLV; MGC10     | 0.00337218 | 0.02054305 | 1.21555547 |
| ISG20       | NM_002201.4 | ISG20       | 10 | Homo sapiens CBS-1; PILB; I  | 0.00335502 | 0.02047615 | 1.12911614 |
| AP1B1       | NM_145730.1 | AP1B1       | 15 | Homo sapiens CD25; HEM45     | 0.003342   | 0.02043427 | 2.39615423 |
| C16orf56    | NM_025082.1 | C16ORF56    | 22 | Homo sapiens CLAPB2; ADTE    | 0.00329317 | 0.02021033 | 1.22346888 |
|             |             |             | 16 | Homo sapiens FLJ13111        | 0.0032861  | 0.02017624 | 1.18355121 |

0.5 Upreg

|             |             |              |    |                               |            |            |            |
|-------------|-------------|--------------|----|-------------------------------|------------|------------|------------|
| PIK4CA      | NM_058004.1 | PIK4CA       | 22 | Homo sapiens pi4K230; FLJ1    | 0.00327813 | 0.02014597 | 1.14876802 |
| RNF217      | NM_152553.2 | RNF217       | 6  | Homo sapiens C6orf172; MG     | 0.00326149 | 0.02006231 | 4.34731952 |
| C2orf7      | NM_032319.1 | C2ORF7       | 2  | Homo sapiens PAP21; MGC1      | 0.00324595 | 0.01998528 | 1.49730052 |
| FLOT1       | NM_005803.2 | FLOT1        | 6  | Homo sapiens flotillin 1 (FLO | 0.00324248 | 0.01997732 | 1.13278938 |
| PIR         | NM_00101810 | PIR          |    | Homo sapiens pirin (iron-bin  | 0.00323374 | 0.01996577 | 1.10314828 |
| RPS4Y1      | NM_001008.3 | RPS4Y1       |    | Homo sapiens RPS4Y; MGC1      | 0.00323682 | 0.01995688 | 1.07375595 |
| SLC44A1     | NM_080546.2 | SLC44A1      | 9  | Homo sapiens RP11-287A8.1     | 0.00323815 | 0.01995578 | 1.09871763 |
|             | Hs.569104   | HS.569104    | 12 | BX337332 Homo sapiens PL      | 0.00322581 | 0.01994467 | 2.63015172 |
| OR52L1      | NM_00100517 | OR52L1       | 11 | Homo sapiens OR11-50          | 0.00322751 | 0.01993659 | 2.59483716 |
| LOC728667   | XM_00112808 | LOC728667    | 14 | PREDICTED: Homo sapiens s     | 0.00322245 | 0.01993319 | 1.76057681 |
| KITLG       | NM_000899.3 | KITLG        | 12 | Homo sapiens DKFZp686F22      | 0.00320171 | 0.0198512  | 1.10319889 |
| PCMTD2      | NM_018257.1 | PCMTD2       | 20 | Homo sapiens FLJ10883; C2     | 0.00320284 | 0.01983962 | 1.24161975 |
| SESTD1      | NM_178123.3 | SESTD1       | 2  | Homo sapiens DKFZp434O05      | 0.00318365 | 0.01977623 | 1.55248268 |
| MT1E        | NM_175617.2 | MT1E         | 16 | Homo sapiens MT1; MTD         | 0.00317936 | 0.01975882 | 1.09472336 |
| ELOF1       | NM_032377.2 | ELOF1        | 19 | Homo sapiens ELF1             | 0.00314832 | 0.0196027  | 1.18764535 |
| HNRPLL      | NM_138394.2 | HNRPLL       | 2  | Homo sapiens SRRF             | 0.00313036 | 0.01950003 | 1.23978234 |
| TNS3        | NM_022748.9 | TNS3         | 7  | Homo sapiens TENS1; FLJ13     | 0.00312332 | 0.01946532 | 1.23807121 |
| PTH2        | NM_178449.2 | PTH2         | 19 | Homo sapiens parathyroid hc   | 0.00311754 | 0.01943844 | 2.12505549 |
| C6orf85     | NM_021945.4 | C6ORF85      | 6  | Homo sapiens DKFZP434F01      | 0.00308189 | 0.01930698 | 1.21002402 |
|             | Hs.539054   | HS.539054    | 11 | xj22c02.x1 NCI_CGAP_Ut2 H     | 0.00308228 | 0.01930026 | 3.76582725 |
| TMEM191B    | XM_938147.1 | TMEM191B     | 22 | PREDICTED: Homo sapiens ti    | 0.00307759 | 0.01929828 | 3.18263513 |
| KLF10       | NM_005655.1 | KLF10        | 8  | Homo sapiens TIEG; EGRA; T    | 0.0030786  | 0.01929546 | 2.60299903 |
| RNF149      | NM_173647.2 | RNF149       | 2  | Homo sapiens FLJ90504; DN     | 0.0030263  | 0.01901262 | 1.09673392 |
| CBLB        | NM_170662.3 | CBLB         | 3  | Homo sapiens DKFZp779F14      | 0.00302739 | 0.01901044 | 1.53463784 |
| INTS5       | NM_030628.1 | INTS5        | 11 | Homo sapiens INT5; KIAA16     | 0.00300846 | 0.01893644 | 1.19760153 |
| STX1A       | NM_004603.1 | STX1A        | 7  | Homo sapiens HPC-1; STX1;     | 0.0029987  | 0.01890196 | 1.18195635 |
| PPIL6       | NM_173672.1 | PPIL6        | 6  | Homo sapiens baA425D10.6; I   | 0.00298609 | 0.01887631 | 1.6772624  |
| RNU1-5      | NR_004400.1 | RNU1-5       | 1  | Homo sapiens HSD4             | 0.00298626 | 0.01886836 | 1.13010885 |
| LOC728791   | XR_015547.2 | LOC728791    |    | PREDICTED: Homo sapiens n     | 0.00298751 | 0.01886729 | 1.13374453 |
| SMAD6       | NM_005585.2 | SMAD6        | 15 | Homo sapiens MADH6; HsT1      | 0.00298035 | 0.01886698 | 4.79949983 |
| FAM113A     | NM_022760.3 | FAM113A      | 20 | Homo sapiens C2orf81; bA1     | 0.00298146 | 0.01885604 | 1.58752307 |
| C14orf159   | NM_024952.4 | C14ORF159    |    | Homo sapiens FLJ39975; C1     | 0.00297706 | 0.0188552  | 1.13327666 |
| C19orf22    | NM_138774.2 | C19ORF22     | 19 | Homo sapiens MGC16353         | 0.00296741 | 0.01882102 | 1.10741647 |
| SNORA79     | NR_003021.2 | SNORA79      | 14 | Homo sapiens ACA65            | 0.00296241 | 0.0187983  | 2.3596311  |
| DHCR24      | NM_014762.2 | DHCR24       | 1  | Homo sapiens Nbla03646; se    | 0.00294197 | 0.01869545 | 1.10282959 |
| C20orf100   | NM_032883.1 | C20ORF100    | 20 | Homo sapiens dj1108D11.2;     | 0.00291255 | 0.01853514 | 1.07581861 |
| FAHD2B      | NM_199336.1 | FAHD2B       | 2  | Homo sapiens DKFZp434N06      | 0.00291107 | 0.01853466 | 1.1666571  |
| RBM20       | XM_291671.6 | RBM20        |    | PREDICTED: Homo sapiens R     | 0.00290571 | 0.01851832 | 1.95912186 |
| ASAP1       | NM_018482.2 | ASAP1        | 8  | Homo sapiens ZG14P; AMAP      | 0.00289335 | 0.01845727 | 1.11966461 |
| DCUN1D3     | NM_173475.1 | DCUN1D3      | 16 | Homo sapiens MGC48972; Cl     | 0.00288718 | 0.01843567 | 1.18171094 |
| PICALM      | NM_007166.2 | PICALM       | 11 | Homo sapiens LAP; CALM; FI    | 0.00287963 | 0.01839635 | 1.13306834 |
| LOC407835   | NR_002144.1 | LOC407835    | 7  | Homo sapiens mitogen-activa   | 0.00287097 | 0.0183587  | 1.14056857 |
| PTGES       | NM_004878.3 | PTGES        | 9  | Homo sapiens mPGES-1; MG      | 0.00286718 | 0.01834333 | 1.33968338 |
| LRBA        | NM_006726.1 | LRBA         | 4  | Homo sapiens BGL; CDC4L; I    | 0.00284513 | 0.01828167 | 1.13808596 |
| SLC35E3     | NM_018656.2 | SLC35E3      | 12 | Homo sapiens BLOV1            | 0.00284068 | 0.01827077 | 1.67732832 |
| TLE1        | NM_005077.3 | TLE1         | 9  | Homo sapiens GRG1; ESG1;      | 0.00284124 | 0.01826549 | 1.25547836 |
| FAT1        | NM_005245.3 | FAT1         | 4  | Homo sapiens ME5; hFat1; C    | 0.00282126 | 0.01815468 | 1.05066676 |
| DYM         | NM_017653.2 | DYM          | 18 | Homo sapiens DMC; SMC; FL     | 0.0028146  | 0.01812942 | 1.15135296 |
| MLXIPL      | NM_032994.1 | MLXIPL       | 7  | Homo sapiens WS-bHLH; MI      | 0.00280155 | 0.01809812 | 1.19398536 |
| ARL8B       | NM_018184.2 | ARL8B        | 3  | Homo sapiens FLJ10702; AR     | 0.00280208 | 0.01809927 | 1.09918318 |
| SNORD51     | NR_002589.1 | SNORD51      | 2  | Homo sapiens U51; RNU51       | 0.00280436 | 0.01808981 | 2.13769375 |
| PPP1R2      | NM_006241.3 | PPP1R2       | 3  | Homo sapiens MGC87148; IF     | 0.00280442 | 0.01808139 | 1.12020045 |
| EAF1        | NM_033083.5 | EAF1         | 3  | Homo sapiens ELL associate    | 0.00278343 | 0.01804264 | 1.16934064 |
| LOC10013436 | XM_00171381 | LOC100134364 |    | PREDICTED: Homo sapiens h     | 0.00277557 | 0.01800044 | 1.07140204 |
| TRAPPC2     | NM_00101165 | TRAPPC2      |    | Homo sapiens hYP38334; TR     | 0.00276438 | 0.01795423 | 1.62716341 |
| CYB561D1    | NM_182580.2 | CYB561D1     | 1  | Homo sapiens cytochrome b-    | 0.00272388 | 0.01775209 | 1.24822366 |
| ZNF45       | NM_003425.2 | ZNF45        | 19 | Homo sapiens KOX5; ZNF13      | 0.00272478 | 0.01774921 | 1.46546769 |
| TTY5        | NR_001541.1 | TTY5         |    | Homo sapiens TTY5             | 0.00271826 | 0.01773288 | 2.31788995 |
| ZBTB42      | NM_00113760 | ZBTB42       | 14 | Homo sapiens zinc finger anc  | 0.00269636 | 0.01763343 | 1.59384427 |
| FIBCD1      | NM_032843.3 | FIBCD1       | 9  | Homo sapiens FLJ14810         | 0.00265483 | 0.01743927 | 1.65051238 |
| BIN1        | NM_139343.1 | BIN1         | 2  | Homo sapiens MGC10367; AI     | 0.00265647 | 0.01743276 | 1.10980558 |
| ZSWIM6      | XM_035299.7 | ZSWIM6       | 5  | PREDICTED: Homo sapiens z     | 0.00264628 | 0.01741761 | 1.36976195 |
| RHOU        | NM_021205.4 | RHOU         | 1  | Homo sapiens WRCH1; CDC4      | 0.00263909 | 0.01737891 | 1.69638812 |
| PAIP2       | NM_00103311 | PAIP2        | 5  | Homo sapiens PAIP2A; MGC7     | 0.0026269  | 0.01734171 | 1.09306752 |
| NFIL3       | NM_005384.2 | NFIL3        | 9  | Homo sapiens IL3BP1; NF-IL    | 0.00262085 | 0.0173277  | 1.19610237 |
| LOC728612   | XR_015601.1 | LOC728612    | 5  | PREDICTED: Homo sapiens n     | 0.00261027 | 0.01730085 | 31.9423672 |
| RFX5        | NM_000449.3 | RFX5         | 1  | Homo sapiens regulatory fact  | 0.00260335 | 0.01728095 | 1.129136   |
| EVI5L       | NM_145245.2 | EVI5L        | 19 | Homo sapiens ecotropic viral  | 0.00259048 | 0.01721273 | 1.19303971 |
| TMEM106B    | NM_018374.2 | TMEM106B     | 7  | Homo sapiens FLJ11273; MG     | 0.00256981 | 0.01709252 | 1.29882786 |
| FES         | NM_002005.2 | FES          | 15 | Homo sapiens FPS              | 0.00255862 | 0.01704378 | 1.20011617 |



0.5 Upreg

|             |             |             |                                 |            |            |            |
|-------------|-------------|-------------|---------------------------------|------------|------------|------------|
| KRTAP2-2    | XM_496261.2 | KRTAP2-2    | PREDICTED: Homo sapiens k       | 0.0025433  | 0.01696727 | 1.67240261 |
| FERMT2      | NM_006832.1 | FERMT2      | 14 Homo sapiens KIND2; FLJ44-   | 0.00253638 | 0.01693813 | 1.16749355 |
| CYB5D2      | NM_144611.2 | CYB5D2      | 17 Homo sapiens MGC32124        | 0.00253361 | 0.01693672 | 1.2545042  |
| PTPN13      | NM_080684.1 | PTPN13      | 4 Homo sapiens PTP1E; PNP1;     | 0.0025348  | 0.01693616 | 1.97819914 |
| MTF1        | NM_005955.1 | MTF1        | 1 Homo sapiens MGC23036; ZI     | 0.00252377 | 0.01688799 | 1.39297118 |
| CLTA        | NM_007096.1 | CLTA        | 9 Homo sapiens LCA              | 0.00251973 | 0.01688651 | 1.09846236 |
| LEPRE1      | NM_022356.2 | LEPRE1      | 1 Homo sapiens P3H1; MGC11      | 0.00252038 | 0.01688233 | 1.32508389 |
| LIMA1       | NM_016357.3 | LIMA1       | 12 Homo sapiens SREBP3; EPLI    | 0.00250371 | 0.01681317 | 1.19213284 |
| SPIRE1      | NM_020148.1 | SPIRE1      | 18 Homo sapiens Spir-1; MGC15   | 0.00248924 | 0.01674145 | 1.15579012 |
| NCAPD2      | NM_014865.2 | NCAPD2      | 12 Homo sapiens hCAP-D2; KIA    | 0.0024729  | 0.01668232 | 1.09523894 |
| FBXO31      | NM_024735.2 | FBXO31      | 16 Homo sapiens FBX14; Fbx31    | 0.00246946 | 0.01666759 | 1.12127929 |
| HDLBP       | NM_003635.2 | HDLBP       | 2 Homo sapiens HBP; VGL; FLJ    | 0.00244826 | 0.01655821 | 1.90443219 |
| SMAP2       | NM_022733.1 | SMAP2       | 1 Homo sapiens SMAP1L; RP1-     | 0.00239888 | 0.01631586 | 1.14265877 |
| LOC645478   | XM_932922.1 | LOC645478   | 16 PREDICTED: Homo sapiens h    | 0.00239978 | 0.01630519 | 2.93397221 |
| CPE         | NM_001873.1 | CPE         | 4 Homo sapiens carboxypeptid    | 0.00240123 | 0.01629835 | 1.23622501 |
| NDST2       | NM_003635.2 | NDST2       | 10 Homo sapiens HSST2; NCST2    | 0.00240167 | 0.01629303 | 3.58659522 |
| LOC730455   | NM_015027.1 | LOC730455   | PREDICTED: Homo sapiens s       | 0.00239174 | 0.01629232 | 1.17418604 |
| UPLP        | NM_00111440 | UPLP        | Homo sapiens uroplakin-like     | 0.00239233 | 0.01628798 | 1.19650117 |
| PTPRE       | NM_130435.2 | PTPRE       | 10 Homo sapiens DKFZp313F13     | 0.00238808 | 0.01627578 | 2.67723869 |
| MGC61598    | XM_939432.1 | MGC61598    | PREDICTED: Homo sapiens s       | 0.00238374 | 0.01626291 | 1.18235432 |
| MAP2K2      | NM_030662.2 | MAP2K2      | 19 Homo sapiens PRKMK2; MAP     | 0.00238142 | 0.01625546 | 1.22404008 |
| FAM117B     | NM_173511.2 | FAM117B     | 2 Homo sapiens FLJ38771; DK     | 0.00236836 | 0.01619971 | 1.18367214 |
| LOC728014   | XM_946270.1 | LOC728014   | 12 PREDICTED: Homo sapiens s    | 0.00235556 | 0.0161371  | 1.15239721 |
| STX12       | NM_177424.1 | STX12       | 1 Homo sapiens STX14; MGC5      | 0.00235779 | 0.01613568 | 1.34171484 |
| UBE1        | NM_153280.1 | UBE1        | Homo sapiens UBA1A; A1S9;       | 0.00234681 | 0.01610211 | 1.10565893 |
| SYT1        | NM_005639.1 | SYT1        | 12 Homo sapiens SVP65; SYT; P   | 0.00232661 | 0.01598837 | 1.54236675 |
| CA11        | NM_001217.3 | CA11        | 19 Homo sapiens CARP2; CA-RP    | 0.00232031 | 0.01596162 | 2.156248   |
| WFDC3       | NM_080614.1 | WFDC3       | 20 Homo sapiens WAP14; dJ447    | 0.00231683 | 0.01595422 | 8.10607854 |
| ANXA2P3     | NR_001446.1 | ANXA2P3     | 10 Homo sapiens ANX2L3; LIP2;   | 0.00228023 | 0.0157595  | 1.35231812 |
| OAT         | NM_000274.1 | OAT         | 10 Homo sapiens HOGA; DKFZp     | 0.00227058 | 0.01570917 | 1.08034471 |
| NLGN2       | NM_020795.2 | NLGN2       | 17 Homo sapiens KIAA1366        | 0.00226052 | 0.01564774 | 1.21679714 |
| SUPT5H      | NM_003169.2 | SUPT5H      | 19 Homo sapiens SUPT5H; SPT5;   | 0.00225576 | 0.01563113 | 1.16402837 |
| UFSP1       | NM_00101507 | UFSP1       | 7 Homo sapiens UFM1-specific    | 0.00225144 | 0.01560933 | 1.98135703 |
| RNF31       | NM_017999.3 | RNF31       | 14 Homo sapiens FLJ23501; MG    | 0.00224402 | 0.0155987  | 1.21102339 |
| PRKACB      | NM_207578.1 | PRKACB      | 1 Homo sapiens PKACB; MGC4      | 0.00223417 | 0.01555471 | 3.65883349 |
| CSRP2       | NM_001321.1 | CSRP2       | 12 Homo sapiens CRP2; LMO5; :   | 0.00223055 | 0.01555399 | 1.1369888  |
| CYP2S1      | NM_030622.5 | CYP2S1      | 19 Homo sapiens cytochrome P4   | 0.00222871 | 0.01554938 | 1.58845133 |
| MGC4677     | XM_939115.1 | MGC4677     | 2 Homo sapiens MGC17532; M      | 0.00221272 | 0.01551127 | 1.22482419 |
| EIF4E3      | NM_173359.3 | EIF4E3      | 3 Homo sapiens MGC86971; M      | 0.0022168  | 0.01549891 | 1.42759898 |
| GPR108      | NM_00108045 | GPR108      | 19 Homo sapiens LUSTR2; MGC     | 0.00220585 | 0.01547129 | 1.50848298 |
| PPM1H       | XM_939302.1 | PPM1H       | 12 Homo sapiens KIAA1157; FL    | 0.00219603 | 0.01543508 | 1.28769933 |
| ACAD10      | NM_025247.3 | ACAD10      | 12 Homo sapiens MGC5601         | 0.00219672 | 0.01543172 | 1.7157979  |
| PRAF2       | NM_007213.1 | PRAF2       | Homo sapiens JM4                | 0.00217416 | 0.01531388 | 1.25124914 |
| MEGF6       | NM_001409.3 | MEGF6       | 1 Homo sapiens KIAA0815; EG     | 0.00216258 | 0.0152485  | 1.9464793  |
| ISYNA1      | NM_016368.3 | ISYNA1      | 19 Homo sapiens IPS             | 0.00214586 | 0.01517902 | 1.15845536 |
| MAP3K12     | NM_006301.2 | MAP3K12     | 12 Homo sapiens DLK; ZPKP1; :   | 0.00213356 | 0.0151324  | 1.59723349 |
| DAAM1       | NM_014992.1 | DAAM1       | 14 Homo sapiens FLJ41657; KIA   | 0.00212946 | 0.01512763 | 1.70896505 |
| DKFZP564O05 | NM_032120.1 | DKFZP564O05 | 7 Homo sapiens HSPC304; DKF     | 0.00212694 | 0.01512593 | 10.241101  |
| SEMA3C      | NM_006379.2 | SEMA3C      | 7 Homo sapiens SEMAE; SemE      | 0.00211921 | 0.01509523 | 16.8248458 |
|             | Hs.57079    | HS.57079    | 10 Homo sapiens cDNA FLJ1326    | 0.00211625 | 0.01508226 | 1.10720316 |
| TRAPPC5     | NM_00104246 | TRAPPC5     | 19 Homo sapiens MGC52424        | 0.00211021 | 0.01507979 | 1.13973533 |
| HSBP1       | NM_001537.2 | HSBP1       | 16 Homo sapiens DKFZp686D16     | 0.00211226 | 0.01507002 | 1.07746652 |
| CYP24A1     | NM_000782.3 | CYP24A1     | 20 Homo sapiens CYP24; P450-C   | 0.00210547 | 0.01505403 | 1.14126807 |
| ZNHIT1      | NM_006349.2 | ZNHIT1      | 7 Homo sapiens ZNFN4A1; CGH     | 0.00210278 | 0.01504288 | 1.09129972 |
| LOC646663   | XM_929606.1 | LOC646663   | 19 PREDICTED: Homo sapiens s    | 0.00208945 | 0.01497986 | 1.92283363 |
| RTN3        | NM_201428.1 | RTN3        | 11 Homo sapiens NSPLII; NSPL2   | 0.0020804  | 0.01493921 | 1.20526902 |
| WDR89       | NM_00100872 | WDR89       | 14 Homo sapiens MSTP050; MG     | 0.00205604 | 0.01480437 | 2.03282631 |
| TEX2        | NM_018469.3 | TEX2        | 17 Homo sapiens KIAA1738; TM    | 0.00204015 | 0.01472195 | 1.16318645 |
| RING1       | NM_002931.3 | RING1       | 6 Homo sapiens RNF1             | 0.00203768 | 0.01471215 | 1.0558552  |
| C10orf41    | XM_210876.4 | C10ORF41    | 10 PREDICTED: Homo sapiens c    | 0.00200246 | 0.01450527 | 1.93219888 |
| LOC10013322 | XM_00172456 | LOC10013322 | PREDICTED: Homo sapiens s       | 0.00200271 | 0.01449912 | 5.39652445 |
| CNTD2       | NM_024877.1 | CNTD2       | 19 Homo sapiens FLJ13265        | 0.00200004 | 0.01449564 | 2.60075403 |
| THOC2       | NM_020449.1 | THOC2       | Homo sapiens CXorf3; dJ506      | 0.00197608 | 0.01435338 | 1.19991208 |
| MSX1        | NM_002448.1 | MSX1        | 4 Homo sapiens HOX7; HYD1       | 0.00196824 | 0.01430424 | 1.08586835 |
| GRN         | NM_002087.2 | GRN         | 17 Homo sapiens PEPI; PGRN; P   | 0.00195969 | 0.01428129 | 1.18123077 |
| KIF1B       | NM_183416.2 | KIF1B       | 1 Homo sapiens KIAA0591; HM     | 0.00195097 | 0.01422554 | 1.25286549 |
| SELM        | NM_080430.2 | SELM        | 22 Homo sapiens MGC40146; SI    | 0.00194893 | 0.01421849 | 1.23331652 |
| RNF165      | NM_152470.2 | RNF165      | 18 Homo sapiens ring finger pro | 0.00194286 | 0.01419768 | 1.4047494  |
|             | Hs.294603   | HS.294603   | 14 Homo sapiens cDNA FLJ1287    | 0.00193901 | 0.01417733 | 1.14236926 |
| UBR4        | NM_020765.1 | UBR4        | 1 Homo sapiens KIAA1307; FL     | 0.00193534 | 0.01415832 | 1.10175705 |

0.5 Upreg

|             |             |             |   |              |                            |                 |            |            |
|-------------|-------------|-------------|---|--------------|----------------------------|-----------------|------------|------------|
| LAMP2       | NM_002294.1 | LAMP2       | X | Homo sapiens | CD107b; LAMP1              | 0.00193217      | 0.01414296 | 1.13323755 |
| SCARNA16    | NR_003013.1 | SCARNA16    |   | 17           | Homo sapiens               | ACA47           | 0.00192679 | 1.37990327 |
| CTSD        | NM_001909.3 | CTSD        |   | 11           | Homo sapiens               | CLN10; MGC2     | 0.00191909 | 1.35641498 |
| GPD1L       | NM_015141.2 | GPD1L       |   | 3            | Homo sapiens               | KIAA0089        | 0.00191083 | 1.11873434 |
| ANG         | NM_001145.2 | ANG         |   | 14           | Homo sapiens               | RNASE5; MGC     | 0.00191272 | 1.23942312 |
| LOC642035   | XM_936105.1 | LOC642035   |   |              | PREDICTED: Homo sapiens    |                 | 0.00190438 | 2.0059734  |
| TUBB2C      | NM_006088.5 | TUBB2C      |   | 9            | Homo sapiens               | TUBB2           | 0.00190545 | 1.06569867 |
| MAPK3       | NM_002746.1 | MAPK3       |   |              | Homo sapiens               | PRKM3; ERK1;    | 0.00190619 | 1.14324097 |
| CYB5R1      | NM_016243.2 | CYB5R1      |   | 1            | Homo sapiens               | B5R.1; NQO3/    | 0.00190126 | 1.50808652 |
|             | Hs.570988   | HS.570988   |   | 5            | Homo sapiens               | primary neuro   | 0.00189719 | 1.34623568 |
| AKAP13      | NM_007200.3 | AKAP13      |   | 15           | Homo sapiens               | HA-3; FLJ1195   | 0.00188588 | 1.63495498 |
| CEP55       | NM_018131.3 | CEP55       |   | 10           | Homo sapiens               | URCC6; C10orf   | 0.00186623 | 1.07541245 |
| LYRM4       | NM_020408.3 | LYRM4       |   | 6            | Homo sapiens               | C6orf149; CGI   | 0.00186314 | 2.04820656 |
| OSBPL2      | NM_144498.1 | OSBPL2      |   | 20           | Homo sapiens               | MGC4307; KIA    | 0.0018597  | 1.29932281 |
| GDPD5       | NM_030792.4 | GDPD5       |   | 11           | Homo sapiens               | PP1665; GDE2    | 0.00185394 | 1.98566512 |
| CADM4       | NM_145296.1 | CADM4       |   | 19           | Homo sapiens               | Necl-4; TSL2    | 0.0018444  | 1.42481814 |
| C14orf79    | NM_174891.2 | C14ORF79    |   | 14           | Homo sapiens               | chromosome 1    | 0.00183828 | 1.63046045 |
| GLRX        | NM_002064.1 | GLRX        |   | 5            | Homo sapiens               | GRX; GRX1; M    | 0.00183678 | 1.09604458 |
| LOC644761   | XR_019390.1 | LOC644761   |   |              | PREDICTED: Homo sapiens    |                 | 0.0018315  | 2.25375651 |
| C20orf46    | NM_018354.1 | C20ORF46    |   | 20           | Homo sapiens               | FLJ11190        | 0.00182952 | 1.15474473 |
| GSTT2B      | NM_00108084 | GSTT2B      |   | 22           | Homo sapiens               | MGC87963; G     | 0.00182276 | 5.11607274 |
|             | Hs.400256   | HS.400256   |   | 4            | Homo sapiens               | cDNA FLJ3373    | 0.00182792 | 3.4765742  |
| SYNJ2BP     | NM_018373.1 | SYNJ2BP     |   | 14           | Homo sapiens               | Arip2; OMP25;   | 0.00182296 | 1.14752729 |
| NELF        | NM_015537.3 | NELF        |   | 9            | Homo sapiens               | RP11-48C7.1;    | 0.00181776 | 1.15322793 |
| RNF20       | NM_019592.5 | RNF20       |   | 9            | Homo sapiens               | BRE1A; MGC1     | 0.00181865 | 1.12377002 |
| FLJ10213    | NM_018029.3 | FLJ10213    |   | 3            | Homo sapiens               | hypothetical p  | 0.00181197 | 1.37261747 |
| EEF2        | NM_001961.2 | EEF2        |   | 19           | Homo sapiens               | EF2; EEF-2      | 0.00181026 | 1.0637534  |
| C9orf9      | NM_018956.3 | C9ORF9      |   | 9            | Homo sapiens               | chromosome 9    | 0.00179956 | 2.27734167 |
|             | Hs.576601   | HS.576601   |   | 10           | DB297320                   | BRACE2 Homo sa  | 0.00179993 | 2.90763072 |
| TPMT        | NM_000367.2 | TPMT        |   | 6            | Homo sapiens               | thiopurine S-n  | 0.00179704 | 1.27933    |
| CBARA1      | NM_006077.1 | CBARA1      |   | 10           | Homo sapiens               | CALC; EFHA3;    | 0.00178859 | 1.31125028 |
|             | Hs.491292   | HS.491292   |   | 8            | Homo sapiens               | cDNA FLJ3655    | 0.00178721 | 1.61292174 |
| MANBA       | NM_005908.2 | MANBA       |   | 4            | Homo sapiens               | MANB1           | 0.001789   | 1.20323153 |
| CORO2A      | NM_052820.2 | CORO2A      |   | 9            | Homo sapiens               | WDR2; CLIPIN    | 0.00178326 | 1.37651089 |
| CD40        | NM_001250.3 | CD40        |   | 20           | Homo sapiens               | TNFRSF5; p50    | 0.00178376 | 4.40007536 |
| SEC11C      | NM_033280.1 | SEC11C      |   | 18           | Homo sapiens               | SPC21; SPCS4    | 0.00177457 | 1.0780719  |
| LOC441763   | XM_930284.1 | LOC441763   |   | 16           | PREDICTED: Homo sapiens    |                 | 0.00177187 | 1.14145732 |
| LOC10012955 | NR_024618.1 | LOC10012955 |   | 3            | Homo sapiens               | hypothetical L  | 0.00177288 | 1.95496269 |
| ETNK2       | NM_018208.1 | ETNK2       |   | 1            | Homo sapiens               | FLJ10761; HM    | 0.00175795 | 2.10597668 |
| LOC728226   | XM_927596.1 | LOC728226   |   | 22           | PREDICTED: Homo sapiens    |                 | 0.00175255 | 3.88764478 |
| MAPRE2      | NM_014268.1 | MAPRE2      |   | 18           | Homo sapiens               | RP1; EB1; EB2   | 0.00175394 | 1.16552252 |
| TSPYL1      | NM_003309.1 | TSPYL1      |   | 6            | Homo sapiens               | TSPYL           | 0.00174916 | 1.10867881 |
| UBL7        | NM_032907.3 | UBL7        |   | 15           | Homo sapiens               | TCBA1; MGC1     | 0.00173986 | 1.33749556 |
| FUZ         | NM_025129.3 | FUZ         |   | 19           | Homo sapiens               | FLJ22688; FY    | 0.00172285 | 3.38200005 |
| ABHD8       | NM_024527.3 | ABHD8       |   | 19           | Homo sapiens               | FLJ11743; MG    | 0.00172055 | 1.71878221 |
| SAMM50      | NM_015380.3 | SAMM50      |   | 22           | Homo sapiens               | OMP85; TOB5     | 0.00171261 | 1.10087658 |
| PTK7        | NM_152880.2 | PTK7        |   | 6            | Homo sapiens               | CCK4            | 0.00170683 | 1.28338688 |
| ZMIZ1       | NM_020338.2 | ZMIZ1       |   | 10           | Homo sapiens               | MIZ; Zimp10;    | 0.00169811 | 1.12341114 |
| FAM50A      | NM_004699.1 | FAM50A      | X |              | Homo sapiens               | DXS9928E; 9F    | 0.00168967 | 1.08597244 |
| LOC646869   | XM_943845.1 | LOC646869   |   |              | PREDICTED: Homo sapiens    |                 | 0.00168989 | 2.32856309 |
| DNAJC2      | NM_014377.1 | DNAJC2      |   | 7            | Homo sapiens               | MPP11; MPH0     | 0.00167656 | 34.3805719 |
| DAB2        | NM_001343.1 | DAB2        |   | 5            | Homo sapiens               | FLJ26626; DO    | 0.00167715 | 2.76287518 |
| PRKCZ       | NM_00103358 | PRKCZ       |   | 1            | Homo sapiens               | PKC2            | 0.00166265 | 1.42554986 |
| BBS7        | NM_018190.2 | BBS7        |   | 4            | Homo sapiens               | FLJ10715; BBS   | 0.00166125 | 2.77772812 |
| PIP5K1C     | NM_012398.1 | PIP5K1C     |   | 19           | Homo sapiens               | PIP5Kgamma;     | 0.00165935 | 1.30812392 |
| MED19       | NM_153450.1 | MED19       |   | 11           | Homo sapiens               | LCMR1           | 0.00165795 | 1.23416562 |
| HIBADH      | NM_152740.2 | HIBADH      |   | 7            | Homo sapiens               | MGC40361; N     | 0.00165364 | 1.09401988 |
| HLA-E       | NM_005516.4 | HLA-E       |   | 6            | Homo sapiens               | DKFZp686P19     | 0.00164989 | 1.13348158 |
|             | Hs.202140   | HS.202140   |   |              | BX114021                   | NCI_CGAP_Lu24 t | 0.00163453 | 4.09946177 |
| NEBL        | NM_006393.1 | NEBL        |   | 10           | Homo sapiens               | MGC119747; l    | 0.00163291 | 16.6259498 |
|             | Hs.541726   | HS.541726   |   | 2            | UI-CF-DU1-adj-b-02-0-UI.s1 |                 | 0.00163074 | 2.66203357 |
| AASDH       | NM_181806.2 | AASDH       |   | 4            | Homo sapiens               | LYS2; ACSF4;    | 0.00161786 | 1.90931154 |
| LOC642859   | XM_932076.1 | LOC642859   |   | 8            | PREDICTED: Homo sapiens    |                 | 0.0016068  | 1.59762318 |
| C10orf78    | NM_145247.4 | C10ORF78    |   | 10           | Homo sapiens               | RP11-373N18.    | 0.00159869 | 1.18392606 |
| LOC10000858 | NR_003286.1 | LOC10000858 |   |              | Homo sapiens               | 18S ribosomal   | 0.00159937 | 1.06544437 |
| ANXA2P1     | NR_001562.1 | ANXA2P1     |   | 4            | Homo sapiens               | LPC2A; ANXA2L   | 0.00158824 | 1.0683857  |
| CMAS        | NM_018686.3 | CMAS        |   | 12           | Homo sapiens               | cytidine mono   | 0.00158854 | 1.10437964 |
| NCOA4       | NM_005437.1 | NCOA4       |   | 10           | Homo sapiens               | RFG; ARA70; l   | 0.00157279 | 1.08160367 |
| HSD17B4     | NM_000414.1 | HSD17B4     |   | 5            | Homo sapiens               | MFE-2           | 0.00157052 | 1.12278356 |
| LOC649076   | XR_018338.2 | LOC649076   |   |              | PREDICTED: Homo sapiens    |                 | 0.00156224 | 1.17771402 |

0.5 Upreg

|           |                       |                                 |            |            |            |
|-----------|-----------------------|---------------------------------|------------|------------|------------|
| TRPM4     | NM_017636.2 TRPM4     | 19 Homo sapiens FLJ20041; TRI   | 0.0015605  | 0.01237203 | 1.22606847 |
| SLC25A23  | NM_024103.2 SLC25A23  | 19 Homo sapiens MGC2615; MC     | 0.00155332 | 0.01232243 | 1.08285746 |
| INSIG2    | NM_016133.2 INSIG2    | 2 Homo sapiens MGC26273         | 0.00154594 | 0.01227858 | 1.25234811 |
| ACTN4     | NM_004924.3 ACTN4     | 19 Homo sapiens DKFZp686K23     | 0.00154018 | 0.01224021 | 1.09761512 |
| FLJ22795  | NM_025084.1 FLJ22795  | 15 Homo sapiens hypothetical p  | 0.00153795 | 0.01223717 | 1.28615868 |
| AGTPBP1   | NM_015239.1 AGTPBP1   | 9 Homo sapiens NNA1; KIAA1C     | 0.00152975 | 0.01220121 | 2.35604985 |
| SCARNA14  | NR_004388.1 SCARNA14  | 15 Homo sapiens U100            | 0.00152236 | 0.01216419 | 1.33980028 |
| MEF2D     | NM_005920.2 MEF2D     | 1 Homo sapiens DKFZp686I15.     | 0.00151718 | 0.01215208 | 1.18417022 |
| ZNF599    | NM_00100724 ZNF599    | 19 Homo sapiens zinc finger pro | 0.00151788 | 0.01215036 | 1.8243572  |
| OSTF1     | NM_012383.3 OSTF1     | 9 Homo sapiens bA235O14.1; ;    | 0.00151042 | 0.01212727 | 1.15179112 |
| TMEM184B  | NM_012264.3 TMEM184B  | 22 Homo sapiens DKFZp686N11     | 0.0014919  | 0.01200039 | 1.25699796 |
| JARID2    | NM_004973.2 JARID2    | 6 Homo sapiens JMJ              | 0.00146953 | 0.01189261 | 1.18157032 |
| PNPLA2    | NM_020376.2 PNPLA2    | 11 Homo sapiens PEDF-R; FP17!   | 0.00145408 | 0.01178919 | 1.29500408 |
| MAP3K1    | XM_042066.1 MAP3K1    | 5 Homo sapiens MAPKKK1; ME      | 0.0014389  | 0.01168038 | 1.3052779  |
| FOXD4     | NM_207305.2 FOXD4     | 9 Homo sapiens FOXD4A; MGC      | 0.00143627 | 0.01166619 | 1.60086632 |
| LOC339352 | XR_019601.2 LOC339352 | PREDICTED: Homo sapiens n       | 0.00143217 | 0.01164718 | 2.06368276 |
| PCOLCE2   | NM_013363.2 PCOLCE2   | 3 Homo sapiens PCPE2            | 0.00142777 | 0.01161853 | 1.47604457 |
| LOC347544 | XM_293412.3 LOC347544 | PREDICTED: Homo sapiens s       | 0.00141312 | 0.01152047 | 1.05328736 |
| BCDIN3D   | NM_181708.1 BCDIN3D   | 12 Homo sapiens BCDIN3 doma     | 0.00140867 | 0.01149124 | 1.21774205 |
| STS-1     | NM_032873.3 STS-1     | 11 Homo sapiens MGC15437; K     | 0.00139565 | 0.01142017 | 1.13610343 |
| SEC22B    | NM_004892.3 SEC22B    | 1 Homo sapiens SEC22L1; ERS     | 0.00139582 | 0.01140755 | 1.28895839 |
| C4orf48   | NM_00114193 C4ORF48   | 4 Homo sapiens chromosome 4     | 0.00137837 | 0.01130671 | 1.3503732  |
| BLVRA     | NM_000712.3 BLVRA     | 7 Homo sapiens BVRA; BLVR       | 0.00136135 | 0.0112157  | 1.11516888 |
| DPY19L1   | XM_938743.1 DPY19L1   | 7 Homo sapiens KIAA0877         | 0.00135402 | 0.01117616 | 1.0889889  |
| RALGPS1   | NM_014636.1 RALGPS1   | 9 Homo sapiens KIAA0351; RA     | 0.00134916 | 0.01114991 | 2.21839481 |
| C7orf30   | NM_138446.1 C7ORF30   | 7 Homo sapiens chromosome 7     | 0.00134631 | 0.01113328 | 1.07962779 |
| SAPS3     | NM_018312.3 SAPS3     | 11 Homo sapiens MGC125712; ;    | 0.00133289 | 0.01109847 | 1.10326444 |
| CTSB      | NM_001908.3 CTSB      | 8 Homo sapiens CPSB; APPS       | 0.00133818 | 0.01109373 | 1.26700649 |
| AGBL5     | NM_021831.5 AGLB5     | 2 Homo sapiens FLJ21839         | 0.00133508 | 0.01108886 | 1.18944773 |
| FAM8A1    | NM_016255.1 FAM8A1    | 6 Homo sapiens FLJ23721; AH     | 0.00132646 | 0.01108669 | 1.52177779 |
|           | Hs.254752 HS.254752   | 3 xv32c11.x1 Soares_NFL_T_C     | 0.0013294  | 0.01108336 | 3.89003734 |
| MGST3     | NM_004528.2 MGST3     | 1 Homo sapiens GST-III          | 0.0013207  | 0.0110665  | 1.06774169 |
| RAPGEF2   | NM_014247.2 RAPGEF2   | 4 Homo sapiens RAZ-GEF; PDZC    | 0.00132076 | 0.01105999 | 1.26849281 |
| GABARAPL1 | NM_031412.2 GABARAPL1 | 12 Homo sapiens ATG8L; GEC1;    | 0.00131754 | 0.01105401 | 1.22061716 |
| SERPINE2  | NM_006216.2 SERPINE2  | 2 Homo sapiens PI7; GDN; PNI    | 0.00130484 | 0.01097526 | 1.05800208 |
| LTA4H     | NM_000895.1 LTA4H     | 12 Homo sapiens leukotriene A4  | 0.00130545 | 0.0109734  | 1.08931295 |
| KISS1R    | NM_032551.3 KISS1R    | 19 Homo sapiens HOT7T175; A     | 0.00128239 | 0.01084141 | 1.68526292 |
| MMP15     | NM_002428.2 MMP15     | 16 Homo sapiens MTMMP2; MT2     | 0.00127559 | 0.01080465 | 2.26021591 |
| FBXO33    | NM_203301.1 FBXO33    | 14 Homo sapiens c14_5247; Fb;   | 0.00127721 | 0.01080455 | 1.16344867 |
| PTGR1     | NM_012212.2 PTGR1     | 9 Homo sapiens MGC34943         | 0.00126831 | 0.01077737 | 1.13899926 |
| BSG       | NM_001728.1 BSG       | 19 Homo sapiens EMMPRIN; OK     | 0.0012684  | 0.01077123 | 1.09233689 |
| PLCG2     | NM_002661.1 PLCG2     | 16 Homo sapiens phospholipase   | 0.00126203 | 0.0107309  | 1.12542507 |
| MGAT4A    | NM_012214.1 MGAT4A    | 2 Homo sapiens GNT-IVA; GNT     | 0.00125725 | 0.01071776 | 5.90624384 |
| TOMM20    | NM_014765.2 TOMM20    | 1 Homo sapiens translocase of   | 0.0012432  | 0.01065965 | 1.07852172 |
| SCNN1D    | NM_002978.2 SCNN1D    | 1 Homo sapiens SCNED; ENaC      | 0.00124453 | 0.01065731 | 1.89787045 |
| CLDN23    | NM_194284.1 CLDN23    | 8 Homo sapiens CLDNL; hCG1      | 0.00124068 | 0.01065187 | 1.97487401 |
| ARL4A     | NM_00103716 ARL4A     | 7 Homo sapiens ARL4             | 0.00124611 | 0.01065018 | 1.42213351 |
| GNS       | NM_002076.2 GNS       | 12 Homo sapiens G65; MGC212     | 0.0012277  | 0.01058155 | 1.08767701 |
| ZNF544    | NM_014480.1 ZNF544    | 19 Homo sapiens zinc finger pro | 0.00122835 | 0.01058022 | 1.25464025 |
| CCNT1     | NM_001240.2 CCNT1     | 12 Homo sapiens CYCT1; CCNT     | 0.00121967 | 0.01053286 | 1.96555702 |
| RPL28     | NM_000991.3 RPL28     | 19 Homo sapiens FLJ43307        | 0.00121626 | 0.01051713 | 1.43202424 |
| VPS16     | NM_080413.1 VPS16     | 20 Homo sapiens hVPS16          | 0.00120653 | 0.01046031 | 1.30336982 |
| S100A4    | NM_002961.2 S100A4    | 1 Homo sapiens FSP1; MTS1; ;    | 0.00119669 | 0.0104022  | 1.05044035 |
|           | Hs.540858 HS.540858   | 17 op77h04.s1 Soares_NFL_T_C    | 0.00119759 | 0.01039641 | 6.85165294 |
| ZHX3      | NM_015035.3 ZHX3      | 20 Homo sapiens KIAA0395; TI    | 0.00118156 | 0.01029769 | 3.00967117 |
| C6orf203  | NM_016487.2 C6ORF203  | 6 Homo sapiens RP11-59I9.1;     | 0.00117546 | 0.01027832 | 1.35698843 |
| ACOT11    | NM_015547.2 ACOT11    | 1 Homo sapiens BFIT2; BFIT1;    | 0.00117681 | 0.01027652 | 1.34287074 |
| SCARNA18  | NR_003139.1 SCARNA18  | 5 Homo sapiens U109             | 0.00117762 | 0.01027011 | 1.99945759 |
| IGF2BP3   | NM_006547.2 IGF2BP3   | 7 Homo sapiens IMP-3; VICKZ     | 0.00117027 | 0.01026002 | 1.11534659 |
| ANO9      | NM_00101230 ANO9      | 11 Homo sapiens TP53I5; PIG5    | 0.00114927 | 0.01012274 | 3.7194713  |
| RABEP1    | NM_004703.3 RABEP1    | 17 Homo sapiens RABPT5; RAB     | 0.00113512 | 0.01005155 | 1.1640561  |
| GAD1      | NM_013445.3 GAD1      | 2 Homo sapiens SCP; FLJ4588     | 0.00112985 | 0.01002496 | 1.73312719 |
| TYROBP    | NM_003332.2 TYROBP    | 19 Homo sapiens DAP12; KARAF    | 0.00111803 | 0.00994008 | 1.67854802 |
| CPXM1     | NM_019609.3 CPXM1     | 20 Homo sapiens CPX1; CPXM      | 0.00111315 | 0.00990332 | 2.55713341 |
|           | Hs.539599 HS.539599   | 13 hv29g09.x1 NCI_CGAP_Lu24     | 0.00109928 | 0.00979961 | 4.26908207 |
| LOC649025 | XM_938110.1 LOC649025 | PREDICTED: Homo sapiens h       | 0.00109509 | 0.00978864 | 2.42868694 |
| LMO2      | NM_005574.2 LMO2      | 11 Homo sapiens TTG2; RBTN2;    | 0.00109561 | 0.00978665 | 2.63290148 |
| FLJ11292  | NM_018382.1 FLJ11292  | 5 Homo sapiens hypothetical p   | 0.00109276 | 0.009781   | 3.56005329 |
| YAF2      | NM_00101242 YAF2      | 12 Homo sapiens MGC41856        | 0.00109043 | 0.0097667  | 1.70602085 |
| CHES1     | NM_005197.2 CHES1     | 14 Homo sapiens C14orf116; FC   | 0.00108681 | 0.0097541  | 1.20856818 |

0.5 Upreg

|             |                          |                                |            |            |            |
|-------------|--------------------------|--------------------------------|------------|------------|------------|
| C1orf97     | NM_032705.2 C1ORF97      | 1 Homo sapiens MGC14801; Fl    | 0.00108534 | 0.00975407 | 1.20628886 |
| SGPL1       | NM_003901.2 SGPL1        | 10 Homo sapiens KIAA1252; SP   | 0.00108746 | 0.00975328 | 1.41789098 |
| NOTCH3      | NM_000435.1 NOTCH3       | 19 Homo sapiens CASIL; CADA5   | 0.00107811 | 0.00971544 | 1.40579024 |
| DNAJC27     | NM_016544.1 DNAJC27      | 2 Homo sapiens RabJ5; DKFZp    | 0.00106936 | 0.00966947 | 2.93846659 |
|             | Hs.103173 HS.103173      | 12 BX100504 Soares_fetal_hear  | 0.00105745 | 0.00958136 | 2.74618685 |
| C14orf132   | NM_020215.2 C14ORF132    | 14 Homo sapiens DKFZp761F20    | 0.00105191 | 0.00954425 | 16.2543866 |
| BMP7        | NM_001719.1 BMP7         | 20 Homo sapiens OP-1           | 0.00104984 | 0.009532   | 2.07685312 |
| PDE6D       | NM_002501.2 PDE6D        | 2 Homo sapiens PDED            | 0.00104451 | 0.00951615 | 1.16901352 |
| PPP1R13B    | NM_015316.1 PPP1R13B     | 14 Homo sapiens p53BP2-like; p | 0.00104574 | 0.00951432 | 1.5667543  |
| ANKRD20A1   | NM_00101242 ANKRD20A1    | Homo sapiens DKFZp434A17       | 0.00104484 | 0.00951265 | 1.44543677 |
| ING5        | XM_941026.1 ING5         | PREDICTED: Homo sapiens ir     | 0.00103323 | 0.00942637 | 1.92119803 |
| CALR        | NM_004343.2 CALR         | 19 Homo sapiens FLJ26680; cC1  | 0.00103099 | 0.00941244 | 1.11445352 |
|             | Hs.565917 HS.565917      | UI-H-BI3-alg-g-11-0-UI.s1 N    | 0.00102905 | 0.00940115 | 3.03473174 |
| C8orf55     | NM_016647.1 C8ORF55      | 8 Homo sapiens DSCD75          | 0.00102529 | 0.00937325 | 1.15164796 |
| ATP1A1      | NM_000701.6 ATP1A1       | 1 Homo sapiens MGC3285; MG     | 0.00101873 | 0.00934552 | 1.07023271 |
| SCARB2      | NM_005506.2 SCARB2       | 4 Homo sapiens D36L2; HLGf     | 0.00101535 | 0.00933392 | 1.09362341 |
| DUSP1       | NM_004417.2 DUSP1        | 5 Homo sapiens HVH1; MKP1;     | 0.00101586 | 0.00933216 | 1.13705636 |
| FER         | NM_005246.1 FER          | 5 Homo sapiens TYK3            | 0.00101324 | 0.00932101 | 1.28988872 |
| LZTR1       | NM_006767.2 LZTR1        | 22 Homo sapiens MGC21205; Tc   | 0.00100421 | 0.00927002 | 1.12118593 |
| HINT2       | NM_032593.2 HINT2        | 9 Homo sapiens HIT-17          | 0.00100456 | 0.00926688 | 1.20325887 |
| TMEM117     | NM_032256.1 TMEM117      | 12 Homo sapiens DKFZp434K24    | 0.00100128 | 0.00926237 | 4.97107596 |
| SUSD3       | NM_145006.2 SUSD3        | 9 Homo sapiens MGC26847        | 0.00100473 | 0.00926194 | 2.35230799 |
| CBX4        | NM_003655.2 CBX4         | 17 Homo sapiens NBP16; PC2; t  | 0.00100001 | 0.00925788 | 1.28812345 |
| FAM13B      | NM_00110180 FAM13B       | 5 Homo sapiens KHCHP; MGC5     | 0.00099789 | 0.00925688 | 1.28613331 |
| PLA2G12A    | NM_030821.3 PLA2G12A     | 4 Homo sapiens PLA2G12         | 0.00099192 | 0.00922727 | 3.49919854 |
| LOC644799   | XM_934554.1 LOC644799    | 20 PREDICTED: Homo sapiens h   | 0.0009921  | 0.00922254 | 1.14341666 |
| GPR137B     | NM_003272.1 GPR137B      | 1 Homo sapiens TM7SF1          | 0.00097788 | 0.00914161 | 2.14292999 |
| TCEA3       | NM_003196.1 TCEA3        | 1 Homo sapiens TFIIS.H; TFIIS  | 0.00096582 | 0.00904803 | 1.45147092 |
| CIB2        | NM_006383.2 CIB2         | 15 Homo sapiens KIP2           | 0.00096409 | 0.00903816 | 1.82419907 |
| DDAH2       | NM_013974.1 DDAH2        | 6 Homo sapiens DDAHII; NG3C    | 0.0009536  | 0.00896516 | 2.15553923 |
| PCNX        | NM_014982.1 PCNX         | 14 Homo sapiens KIAA0805; PC   | 0.00095365 | 0.00895931 | 1.38641344 |
| S100A14     | NM_020672.1 S100A14      | 1 Homo sapiens S100A15; BCM    | 0.00094611 | 0.00892008 | 1.27291854 |
| OR8J3       | NM_00100406 OR8J3        | 11 Homo sapiens OR11-173       | 0.00094217 | 0.00889554 | 1.93405076 |
|             | Hs.562197 HS.562197      | 1 602137688F1 NIH_MGC_83 l     | 0.00093402 | 0.00883126 | 3.83838017 |
| RELL1       | NM_00108540 RELL1        | 4 Homo sapiens MGC50583; Fl    | 0.00093136 | 0.00881239 | 1.3766411  |
| VKORC1      | NM_024006.4 VKORC1       | 16 Homo sapiens MST134; EDTF   | 0.00092509 | 0.00877184 | 1.07878406 |
| UBL5        | NM_00104824 UBL5         | 19 Homo sapiens HUB1; MGC13    | 0.00092535 | 0.00876798 | 1.09531366 |
| UTS2        | NM_006786.2 UTS2         | 1 Homo sapiens UCN2; PRO10i    | 0.00091861 | 0.0087416  | 17.5398408 |
| CCNYL1      | NM_152523.1 CCNYL1       | 2 Homo sapiens FLJ40432        | 0.00091403 | 0.00871052 | 2.53934627 |
| CCDC24      | NM_152499.1 CCDC24       | 1 Homo sapiens RP5-1198O20.    | 0.00090712 | 0.00866335 | 1.15344502 |
| LUZP1       | NM_033631.2 LUZP1        | 1 Homo sapiens KIAA0601; LU    | 0.00090319 | 0.00863203 | 1.12690323 |
| TRAPPC6A    | NM_024108.1 TRAPPC6A     | 19 Homo sapiens MGC2650; TR!   | 0.000902   | 0.00862695 | 1.8398594  |
| LOC10013253 | XR_038464.1 LOC100132535 | PREDICTED: Homo sapiens n      | 0.0009008  | 0.0086217  | 1.3309273  |
| FLJ23834    | NM_152750.2 FLJ23834     | 7 Homo sapiens FLJ43271; MG    | 0.00089329 | 0.00859317 | 1.98644629 |
| CLEC16A     | NM_015226.2 CLEC16A      | 16 Homo sapiens KIAA0350; Go   | 0.00088524 | 0.0085406  | 1.25270107 |
| CORIN       | NM_006587.2 CORIN        | 4 Homo sapiens Lrp4; Tmprss    | 0.00088584 | 0.00854011 | 1.47204051 |
| NECAP2      | NM_018090.3 NECAP2       | 1 Homo sapiens FLJ10420; RP4   | 0.00088434 | 0.00853813 | 1.18177362 |
| C2orf64     | NM_00100821 C2ORF64      | 2 Homo sapiens 6330578E17R!    | 0.00088273 | 0.00853494 | 1.28721625 |
| MAOB        | NM_000898.3 MAOB         | Homo sapiens MGC26382          | 0.000878   | 0.00850785 | 1.17817951 |
| ZBTB46      | NM_025224.2 ZBTB46       | 20 Homo sapiens BTBD4; ZNF34   | 0.00087657 | 0.00850649 | 1.445994   |
| PDGFRL      | NM_006207.1 PDGFRL       | 8 Homo sapiens PRLTS; PDGRL    | 0.00087288 | 0.00847684 | 1.26446045 |
| DSP         | NM_004415.2 DSP          | 6 Homo sapiens DPI; DPII       | 0.00085941 | 0.00837671 | 1.35427971 |
| CALM3       | NM_005184.2 CALM3        | 19 Homo sapiens PHK4; PHK3     | 0.00085823 | 0.00837138 | 1.06280068 |
| NCOR2       | NM_006312.2 NCOR2        | 12 Homo sapiens TNR14; SMR'    | 0.00085239 | 0.00832663 | 1.15916634 |
| KRTAP2-1    | XM_927523.1 KRTAP2-1     | 17 PREDICTED: Homo sapiens k   | 0.00084474 | 0.00828247 | 1.67992077 |
| LACTB       | NM_171846.1 LACTB        | 15 Homo sapiens FLJ14902; G2-  | 0.00084186 | 0.00826036 | 1.73285676 |
| LYRM1       | NM_020424.2 LYRM1        | 16 Homo sapiens A211C6.1       | 0.00083351 | 0.0082088  | 1.08818576 |
| CERCAM      | NM_016174.3 CERCAM       | 9 Homo sapiens CEECAM1; MG     | 0.00083215 | 0.00820753 | 2.675965   |
| RETSAT      | NM_017750.2 RETSAT       | 2 Homo sapiens FLJ20296        | 0.00081833 | 0.00809533 | 1.28278644 |
| TUBB4Q      | NM_020040.3 TUBB4Q       | 4 Homo sapiens tubulin, beta p | 0.00081874 | 0.00809342 | 1.1527763  |
| PJA2        | NM_014819.2 PJA2         | Homo sapiens KIAA0438; RN      | 0.0008144  | 0.00806854 | 1.11440346 |
| ARC         | NM_015193.3 ARC          | 8 Homo sapiens KIAA0278        | 0.00080976 | 0.00802852 | 16.5903275 |
| TUBB3       | NM_006086.2 TUBB3        | 16 Homo sapiens TUBB4; MC1R    | 0.00080733 | 0.00802248 | 1.08237778 |
| ZNF558      | NM_144693.1 ZNF558       | 19 Homo sapiens FLJ30932       | 0.00080022 | 0.00796969 | 1.55305304 |
| RN5S9       | NR_023371.1 RN5S9        | 1 Homo sapiens RNA, 5S riboso  | 0.00078054 | 0.00783261 | 1.36558519 |
| TMBIM6      | NM_003217.1 TMBIM6       | 12 Homo sapiens BI-1; TMBIM6   | 0.00077618 | 0.00780659 | 1.06233769 |
| CD9         | NM_001769.2 CD9          | 12 Homo sapiens MRP-1; MIC3;   | 0.00075986 | 0.00768321 | 1.16982684 |
| TMEM50A     | NM_014313.2 TMEM50A      | 1 Homo sapiens SMP1; RP11-3    | 0.00075393 | 0.00763488 | 1.78138398 |
| CORO6       | NM_032854.1 CORO6        | 17 Homo sapiens FLJ14871       | 0.00075046 | 0.00761727 | 63.3469804 |
| KCNH3       | NM_012284.1 KCNH3        | 12 Homo sapiens BEC1; ELK2; k  | 0.00074485 | 0.00758349 | 1.19173219 |

0.5 Upreg

|             |             |             |    |                              |            |            |            |
|-------------|-------------|-------------|----|------------------------------|------------|------------|------------|
| SNN         | NM_003498.3 | SNN         | 16 | Homo sapiens stannin (SNN)   | 0.0007441  | 0.00758167 | 4.81893818 |
| CD99        | NM_002414.3 | CD99        |    | Homo sapiens MIC2; MIC2Y;    | 0.00074147 | 0.00756655 | 1.2385618  |
| LOC649917   | XR_036859.1 | LOC649917   |    | PREDICTED: Homo sapiens n    | 0.00074182 | 0.00756433 | 1.66946245 |
| RNU1-3      | NR_004408.1 | RNU1-3      | 1  | Homo sapiens U1C21           | 0.00074058 | 0.00756323 | 1.37614783 |
| C20orf3     | NM_020531.2 | C20ORF3     | 20 | Homo sapiens BSCv; APMAP     | 0.00073132 | 0.00749178 | 1.15201875 |
| DNM2        | NM_004945.2 | DNM2        | 19 | Homo sapiens CMTD11; CMTI    | 0.00073164 | 0.00748926 | 1.45466053 |
| SH3GLB2     | NM_020145.2 | SH3GLB2     | 9  | Homo sapiens PP9455; PP65    | 0.00073034 | 0.00748749 | 1.09568295 |
| CD164L2     | NM_00112627 | CD164L2     | 1  | Homo sapiens UNQ6122         | 0.00072589 | 0.00744769 | 3.27358223 |
| MFSD3       | NM_138431.1 | MFSD3       | 8  | Homo sapiens major facilitat | 0.00072333 | 0.00743866 | 1.11145889 |
| HES4        | NM_021170.2 | HES4        | 1  | Homo sapiens hairy and enh   | 0.00072175 | 0.00742819 | 1.08752753 |
| COMMD6      | NM_203497.1 | COMMD6      | 13 | Homo sapiens Acrg            | 0.00071496 | 0.00738122 | 1.07314444 |
| CAMLG       | NM_001745.2 | CAMLG       | 5  | Homo sapiens CAML; MGC16     | 0.00070612 | 0.00731844 | 1.11125347 |
| TMEM41B     | NM_015012.1 | TMEM41B     | 11 | Homo sapiens MGC33897; K     | 0.00070626 | 0.00731418 | 1.10517367 |
| TUBB2A      | TUBB        | TUBB2A      | 6  | Homo sapiens TUBB; TUBB2;    | 0.00068984 | 0.00718909 | 1.16782448 |
| KIAA0922    | NM_015196.2 | KIAA0922    | 4  | Homo sapiens FLJ10592; TM    | 0.00068182 | 0.00713923 | 1.26815333 |
| LOC730288   | XM_00112627 | LOC730288   | 7  | PREDICTED: Homo sapiens s    | 0.00068211 | 0.00713654 | 1.08394037 |
| DIRC2       | NM_032839.1 | DIRC2       | 3  | Homo sapiens FLJ14784; RC    | 0.00067963 | 0.00712188 | 1.23663349 |
| ADCK5       | NM_174922.3 | ADCK5       | 8  | Homo sapiens MGC126708; I    | 0.00067794 | 0.00710976 | 1.91619696 |
| BCAS4       | NM_017843.3 | BCAS4       | 20 | Homo sapiens FLJ20495        | 0.00067307 | 0.00707549 | 1.28950494 |
| RAB26       | NM_014353.4 | RAB26       | 16 | Homo sapiens V46133          | 0.00067307 | 0.00706993 | 1.14823219 |
| GMDS        | NM_001500.2 | GMDS        | 6  | Homo sapiens GMD             | 0.00066661 | 0.00703568 | 1.10500357 |
| SPIRE2      | NM_032451.1 | SPIRE2      | 16 | Homo sapiens MGC117166; S    | 0.00066713 | 0.00703538 | 1.56473173 |
| PERP        | NM_022121.2 | PERP        | 6  | Homo sapiens THW; RP3-49     | 0.00066351 | 0.00701958 | 1.11000763 |
| EPHA1       | NM_005232.3 | EPHA1       | 7  | Homo sapiens EPHT; MGC16     | 0.00065777 | 0.00698671 | 1.27502823 |
| HIST1H1C    | NM_005319.3 | HIST1H1C    | 6  | Homo sapiens MGC3992; H1     | 0.00065875 | 0.00698594 | 1.28736095 |
| NDRG3       | NM_022477.2 | NDRG3       | 20 | Homo sapiens FLJ13556        | 0.00065329 | 0.0069447  | 1.18481686 |
| LOC10013305 | XM_00171491 | LOC10013305 | 5  | PREDICTED: Homo sapiens h    | 0.00064575 | 0.00687006 | 5.21627713 |
| SNX2        | NM_003100.2 | SNX2        | 5  | Homo sapiens TRG-9; MGC5     | 0.00064033 | 0.00685085 | 1.13970652 |
| ZNF431      | NM_133473.1 | ZNF431      | 19 | Homo sapiens KIAA1969; DK    | 0.00064228 | 0.00684965 | 1.80555917 |
| LOC10013172 | XM_00172015 | LOC10013172 | 4  | PREDICTED: Homo sapiens h    | 0.00064052 | 0.00684741 | 4.22593886 |
| KIFC2       | NM_145754.2 | KIFC2       | 8  | Homo sapiens kinesin family  | 0.00063268 | 0.00680197 | 1.1226465  |
| CYB5A       | NM_148923.2 | CYB5A       | 18 | Homo sapiens MCB5; CYB5      | 0.00063306 | 0.00680047 | 1.16566253 |
| MTIF3       | NM_152912.3 | MTIF3       | 13 | Homo sapiens IF-3mt; IF3(m   | 0.0006285  | 0.00677902 | 1.18107077 |
| LOC646786   | XM_929738.1 | LOC646786   | 6  | PREDICTED: Homo sapiens s    | 0.00062478 | 0.00676093 | 1.65513589 |
| MTMR14      | NM_022485.2 | MTMR14      | 3  | Homo sapiens FLJ22405; C3    | 0.00061955 | 0.0067098  | 1.25170535 |
| SERPINE1    | NM_000602.1 | SERPINE1    | 7  | Homo sapiens PAI; PAI-1; PA  | 0.00061799 | 0.00669831 | 6.55926231 |
| METTL10     | NM_212554.2 | METTL10     | 10 | Homo sapiens methyltransfer  | 0.00061514 | 0.00668935 | 5.53440328 |
| RAB24       | NM_00103167 | RAB24       | 5  | Homo sapiens RAB24, memb     | 0.00061615 | 0.00668929 | 1.37969045 |
| FAM89B      | NM_152832.1 | FAM89B      | 11 | Homo sapiens MTRV1           | 0.00061036 | 0.00667569 | 1.15348034 |
| RDX         | NM_002906.3 | RDX         | 11 | Homo sapiens radixin (RDX),  | 0.00060611 | 0.00664011 | 1.18600047 |
| SMAD5       | NM_005903.5 | SMAD5       | 5  | Homo sapiens Dwf; DKFZp7     | 0.00060163 | 0.00660752 | 1.18798944 |
| FAR2        | NM_018099.3 | FAR2        | 12 | Homo sapiens FAR2; FLJ104    | 0.00059954 | 0.00658992 | 19.1402769 |
| H1FO        | NM_005318.2 | H1FO        | 22 | Homo sapiens H1FV; MGC52     | 0.00059482 | 0.00656533 | 1.08460008 |
| HIF1AN      | NM_017902.1 | HIF1AN      | 10 | Homo sapiens DKFZp762F18     | 0.00059067 | 0.00653578 | 1.30103049 |
| CPA4        | NM_016352.2 | CPA4        | 7  | Homo sapiens CPA3            | 0.00059163 | 0.00653556 | 2.1569373  |
| MANEAL      | NM_00103174 | MANEAL      | 1  | Homo sapiens RP11-109P14.    | 0.00059096 | 0.00653354 | 2.65018055 |
| TMC6        | NM_007267.5 | TMC6        | 17 | Homo sapiens LAK-4P; EVIN    | 0.00058917 | 0.00652466 | 1.27714636 |
| PRCP        | NM_005040.2 | PRCP        | 11 | Homo sapiens HUMPCP; PCP;    | 0.00058727 | 0.00651448 | 1.0844498  |
| TRAF3       | NM_003300.2 | TRAF3       | 14 | Homo sapiens CD40bp; CAP-    | 0.0005853  | 0.00649811 | 3.35587822 |
| TNFAIP1     | NM_021137.3 | TNFAIP1     | 17 | Homo sapiens EDP1; B61; B    | 0.0005821  | 0.00646794 | 1.2788571  |
| LOC653344   | XM_933085.1 | LOC653344   | 15 | PREDICTED: Homo sapiens s    | 0.00057939 | 0.00645409 | 1.16913856 |
| FARP1       | NM_00100171 | FARP1       | 13 | Homo sapiens CDEP; PLEKHC    | 0.00057972 | 0.00645239 | 3.52651568 |
| UNC84B      | NM_015374.1 | UNC84B      | 22 | Homo sapiens KIAA0668; MC    | 0.00057982 | 0.00644804 | 1.11120824 |
| C9orf45     | NM_030814.4 | C9ORF45     | 9  | PREDICTED: Homo sapiens c    | 0.00057102 | 0.00639311 | 1.6921201  |
| PEX6        | NM_000287.2 | PEX6        | 6  | Homo sapiens PAF-2; PAF2; I  | 0.0005661  | 0.00634878 | 1.4465847  |
| C5orf34     | NM_198566.1 | C5ORF34     | 5  | Homo sapiens MGC46448; FL    | 0.00055833 | 0.00628292 | 32.6056294 |
| PIH1D1      | NM_017916.1 | PIH1D1      | 19 | Homo sapiens NOP17; FLJ20    | 0.00055868 | 0.00628151 | 1.30492279 |
| GLO1        | NM_006708.1 | GLO1        | 6  | Homo sapiens GLYI; GLOD1     | 0.00055579 | 0.00627026 | 1.0791003  |
| EPHX1       | NM_000120.2 | EPHX1       | 1  | Homo sapiens EPOX; MEH; E    | 0.00055501 | 0.00626675 | 1.6420854  |
| IFIT1       | NM_001548.2 | IFIT1       | 10 | Homo sapiens RNMS61; IFI-!   | 0.00055235 | 0.00625811 | 3.17209287 |
| ARL6IP1     | NM_015161.1 | ARL6IP1     | 16 | Homo sapiens ARMER; AIP1;    | 0.00055317 | 0.00625667 | 1.08427262 |
| ZCCHC17     | NM_016505.2 | ZCCHC17     | 1  | Homo sapiens pNO40; PS1D;    | 0.00055123 | 0.00625604 | 1.15122524 |
| ENO2        | NM_001975.2 | ENO2        | 12 | Homo sapiens NSE             | 0.00055144 | 0.00625313 | 1.12395527 |
| ANXA5       | NM_001154.2 | ANXA5       | 4  | Homo sapiens PP4; ANX5; EI   | 0.0005483  | 0.0062335  | 1.06971357 |
| ITFG3       | NM_032039.1 | ITFG3       | 16 | Homo sapiens FLJ32603; DK    | 0.00054508 | 0.00621289 | 1.41692602 |
| RCC1        | NM_001269.3 | RCC1        | 1  | Homo sapiens RCC1-I; CHC1    | 0.00054306 | 0.00620587 | 15.4320884 |
| CRIPAK      | NM_175918.2 | CRIPAK      | 4  | Homo sapiens FLJ34443        | 0.00054199 | 0.00619897 | 1.39517762 |
| TCTA        | NM_022171.1 | TCTA        | 3  | Homo sapiens T-cell leukemia | 0.00053854 | 0.00617548 | 2.23021612 |
| SAMD3       | NM_00101737 | SAMD3       | 6  | Homo sapiens MGC35163; FL    | 0.0005378  | 0.00617233 | 1.78704654 |
| SNAPC2      | NM_003083.1 | SNAPC2      | 19 | Homo sapiens PTFdelta; SNA   | 0.00053343 | 0.00613287 | 1.23323082 |

0.5 Upreg

|           |                       |                                 |            |            |            |
|-----------|-----------------------|---------------------------------|------------|------------|------------|
| GHDC      | NM_032484.3 GHDC      | 17 Homo sapiens D11LGP1; LGF    | 0.00053249 | 0.00613267 | 1.63977335 |
| PGF       | NM_002632.4 PGF       | 14 Homo sapiens PGFL; PIGF-2;   | 0.00053364 | 0.00612991 | 23.1382363 |
| AP2A1     | NM_014203.2 AP2A1     | 19 Homo sapiens CLAPA1; AP2-    | 0.00053251 | 0.00612759 | 1.8581983  |
| MYH10     | NM_005964.1 MYH10     | 17 Homo sapiens NMMHCB; MGH     | 0.00052362 | 0.00605154 | 1.10471166 |
| ARHGEF10  | NM_014629.2 ARHGEF10  | 8 Homo sapiens GEF10; DKFZ      | 0.00051868 | 0.00600485 | 1.13966086 |
| PTEN      | NM_000314.3 PTEN      | 10 Homo sapiens MMAC1; MHA      | 0.00051509 | 0.00596853 | 1.22441214 |
|           | Hs.363526 HS.363526   | 8 Homo sapiens cDNA clone IM    | 0.00051395 | 0.00596574 | 1.23885058 |
| MLEC      | NM_014730.2 MLEC      | 12 Homo sapiens malectin (MLE   | 0.00051272 | 0.00595671 | 1.1013393  |
| TTPAL     | NM_024331.2 TTPAL     | 20 Homo sapiens DKFZp686E08     | 0.00050968 | 0.00593705 | 1.39518881 |
| ABHD6     | NM_020676.4 ABHD6     | 3 Homo sapiens abhydrolase d    | 0.00050705 | 0.00592721 | 1.36391644 |
| GAL3ST4   | NM_024637.3 GAL3ST4   | 7 Homo sapiens FLJ12116; GA     | 0.000504   | 0.00590716 | 3.26831599 |
| CSPG4     | NM_001897.3 CSPG4     | 15 Homo sapiens MSK16; MCSP     | 0.00050403 | 0.00590233 | 2.43136035 |
|           | Hs.534061 HS.534061   | 17 full-length cDNA clone XCL0E | 0.00049969 | 0.0058723  | 1.14951461 |
| CDCP1     | NM_022842.3 CDCP1     | 3 Homo sapiens SIMA135; TRA     | 0.00049317 | 0.00582148 | 1.28602895 |
| RRAGA     | NM_006570.4 RRAGA     | 9 Homo sapiens RAGA; FIP-1      | 0.00049091 | 0.00581032 | 1.10577836 |
| CTRC      | NM_007272.2 CTRC      | 1 Homo sapiens ELA4; CLCR       | 0.00049161 | 0.00580822 | 1.80131288 |
| AXIN2     | NM_004655.2 AXIN2     | 17 Homo sapiens MGC126582; I    | 0.00048986 | 0.00580305 | 1.21241362 |
| CDKN3     | NM_005192.2 CDKN3     | 14 Homo sapiens CD11; KAP; M    | 0.00048749 | 0.00579572 | 1.12687976 |
| KLHL29    | XM_00171745 KLHL29    | 2 PREDICTED: Homo sapiens k     | 0.00048808 | 0.00579233 | 1.28252116 |
| LOC642946 | XM_931870.1 LOC642946 | 1 PREDICTED: Homo sapiens h     | 0.0004851  | 0.00578282 | 3.45605332 |
| FLJ43276  | NM_207382.1 FLJ43276  | 15 Homo sapiens FLJ43276 prot   | 0.00048543 | 0.00578153 | 2.1825983  |
| GPR89A    | NM_016334.2 GPR89A    | 1 Homo sapiens SH120; GPR89     | 0.00048078 | 0.00576762 | 7.7178062  |
| HMG20B    | NM_006339.1 HMG20B    | 19 Homo sapiens SMARCE1r; FL    | 0.00048165 | 0.00576236 | 1.10112698 |
| CYB5R3    | NM_007326.2 CYB5R3    | 22 Homo sapiens DIA1; B5R       | 0.00047959 | 0.00575857 | 1.09047885 |
| OCEL1     | NM_024578.1 OCEL1     | 19 Homo sapiens S863-9; FLJ22   | 0.00047266 | 0.00569604 | 1.20518536 |
| LOC652353 | XM_941781.1 LOC652353 | PREDICTED: Homo sapiens s       | 0.00046106 | 0.00558662 | 2.82820118 |
| FSTL3     | NM_005860.1 FSTL3     | 19 Homo sapiens FLRG; FSRP      | 0.00045911 | 0.00556815 | 1.85739824 |
| CAPZA2    | NM_006136.2 CAPZA2    | 7 Homo sapiens CAPZ; CAPP2      | 0.00045722 | 0.00555534 | 1.10741517 |
| FOS       | NM_005252.2 FOS       | 14 Homo sapiens c-fos           | 0.00045728 | 0.00555105 | 1.09728802 |
| MAN1B1    | NM_016219.2 MAN1B1    | 9 Homo sapiens MANA-ER          | 0.00045632 | 0.0055495  | 1.1574567  |
| CALM1     | NM_006888.2 CALM1     | 14 Homo sapiens PHKD; CALML     | 0.00045428 | 0.00552978 | 1.11755538 |
| SLC9A1    | NM_003047.2 SLC9A1    | 1 Homo sapiens APNH; FLJ422     | 0.00045241 | 0.00552732 | 1.39089692 |
| CDKN1A    | NM_078467.1 CDKN1A    | 6 Homo sapiens P21; MDA-6; S    | 0.00045066 | 0.00552127 | 1.11240306 |
| PRAME     | NM_206956.1 PRAME     | 22 Homo sapiens MAPE; OIP4      | 0.00044621 | 0.00548189 | 1.57327303 |
| LSR       | NM_205834.2 LSR       | 19 Homo sapiens MGC48312; LI    | 0.00044134 | 0.00543218 | 1.31976807 |
| KRTDAP    | NM_207392.1 KRTDAP    | 19 Homo sapiens MGC163373; I    | 0.0004369  | 0.00539749 | 1.97933459 |
| ID3       | NM_002167.2 ID3       | 1 Homo sapiens HEIR-1           | 0.00043765 | 0.00539669 | 1.07894192 |
| WIPI1     | NM_017983.3 WIPI1     | Homo sapiens WIPI49; FLJ10      | 0.00043714 | 0.00539544 | 1.3739424  |
| YIPF1     | NM_018982.3 YIPF1     | 1 Homo sapiens FinGER1; DJ1     | 0.00043485 | 0.00538726 | 1.21721634 |
| ANXA2     | NM_00100285 ANXA2     | 15 Homo sapiens P36; LPC2D; A   | 0.00043213 | 0.00536859 | 1.05843253 |
| PALM      | NM_002579.1 PALM      | 19 Homo sapiens KIAA0270        | 0.0004324  | 0.00536619 | 1.27782299 |
| LCOR      | NM_032440.1 LCOR      | 10 Homo sapiens FLJ38026; ML    | 0.00042905 | 0.00533538 | 1.1682299  |
| HYAL3     | NM_003549.2 HYAL3     | 3 Homo sapiens LUCA14; Minn     | 0.00042592 | 0.00531137 | 3.06358396 |
| ECGF1     | NM_001953.2 ECGF1     | 22 Homo sapiens TP; PDECGF; t   | 0.00042519 | 0.00530722 | 1.14998024 |
| MXRA7     | NM_00100852 MXRA7     | 17 Homo sapiens TMAP1; PS1TF    | 0.0004238  | 0.00529988 | 1.53300767 |
| EXT1      | NM_000127.2 EXT1      | 8 Homo sapiens ttv; EXT         | 0.00042134 | 0.00527414 | 1.44817198 |
| STX8      | NM_004853.1 STX8      | 17 Homo sapiens CARB            | 0.00041947 | 0.00526067 | 1.17175763 |
| NFKB2     | NM_00107749 NFKB2     | 10 Homo sapiens LYT10; LYT-10   | 0.00041868 | 0.00525575 | 1.62643705 |
| CAT       | NM_001752.2 CAT       | 11 Homo sapiens MGC138424; I    | 0.00041787 | 0.00525048 | 1.2330766  |
| ATP6V1B2  | NM_001693.2 ATP6V1B2  | 8 Homo sapiens VATB; VPP3; A    | 0.00041661 | 0.00524457 | 1.093417   |
| SERPINA5  | NM_000624.3 SERPINA5  | 14 Homo sapiens PROCI; PAI3;    | 0.00041234 | 0.00521563 | 2.90032132 |
| ATP6V0E2  | NM_145230.1 ATP6V0E2  | 7 Homo sapiens ATP6V0E2L; C     | 0.00040822 | 0.00517343 | 1.11275405 |
| SIPA1L2   | NM_020808.1 SIPA1L2   | 1 Homo sapiens SPAL2; FLJ231    | 0.00040848 | 0.00517177 | 1.37428482 |
| ANKDD1A   | NM_182703.2 ANKDD1A   | 15 Homo sapiens MGC120306; I    | 0.00039217 | 0.00504224 | 1.28611686 |
| DYNLL2    | NM_080677.1 DYNLL2    | 17 Homo sapiens MGC17810; D     | 0.0003913  | 0.00503597 | 1.18501765 |
| CRIP1     | NM_001311.3 CRIP1     | 14 Homo sapiens CRIP; CRP1; C   | 0.00039235 | 0.00503483 | 1.12378086 |
| KIAA0427  | NM_014772.1 KIAA0427  | 18 Homo sapiens Gm672           | 0.00038945 | 0.00502197 | 2.73966924 |
| CDK6      | NM_001259.5 CDK6      | 7 Homo sapiens PLSTIRE; MGC     | 0.0003867  | 0.00500591 | 1.19152913 |
| INTS12    | NM_020395.2 INTS12    | 4 Homo sapiens PHF22; INT12     | 0.00038268 | 0.00497822 | 1.16924968 |
| TSPAN5    | NM_005723.2 TSPAN5    | 4 Homo sapiens TSPAN-5; TM4     | 0.00038057 | 0.00497519 | 1.18356764 |
| CPSF3L    | NM_017871.3 CPSF3L    | 1 Homo sapiens RC68; RC-68;     | 0.00038061 | 0.00497084 | 1.28713987 |
| GRAMD1A   | NM_020895.2 GRAMD1A   | 19 Homo sapiens FLJ90346; FLJ   | 0.00037916 | 0.00496653 | 1.23188949 |
| TUBB6     | XM_940079.1 TUBB6     | PREDICTED: Homo sapiens t       | 0.00037863 | 0.00496449 | 1.19147906 |
| STUB1     | NM_005861.2 STUB1     | 16 Homo sapiens CHIP; SDCCA     | 0.00037778 | 0.00495826 | 1.1443201  |
| ABCC10    | NM_033450.2 ABCC10    | 6 Homo sapiens MRP7; EST182     | 0.00037575 | 0.00493648 | 3.23379739 |
| PLEKHM1   | NM_014798.1 PLEKHM1   | PREDICTED: Homo sapiens p       | 0.0003712  | 0.00489132 | 1.99010142 |
| KIF13B    | NM_015254.2 KIF13B    | 8 Homo sapiens KIAA0639; GA     | 0.00036356 | 0.0048194  | 2.52518147 |
| C3orf10   | NM_018462.4 C3ORF10   | 3 Homo sapiens MDS027; HSP      | 0.00035849 | 0.00476644 | 1.14849805 |
| ACSL1     | NM_001995.2 ACSL1     | 4 Homo sapiens FACL2; LACS;     | 0.00035074 | 0.0046822  | 1.57746982 |
| LOC644511 | XM_934381.1 LOC644511 | PREDICTED: Homo sapiens s       | 0.00034848 | 0.00466616 | 1.0732759  |

0.5 Upreg

|             |             |             |    |                           |                              |            |            |            |
|-------------|-------------|-------------|----|---------------------------|------------------------------|------------|------------|------------|
| IGFBP2      | NM_000597.2 | IGFBP2      | 2  | Homo sapiens              | IGF-BP53; IBF                | 0.00034763 | 0.00466417 | 1.1779265  |
| CD47        | NM_00102508 | CD47        | 3  | Homo sapiens              | OA3; MER6; I                 | 0.00034527 | 0.00464183 | 2.31986179 |
| GRPR        | NM_005314.2 | GRPR        |    |                           | Homo sapiens gastrin-releasi | 0.00034376 | 0.00462625 | 2.16317705 |
| GGH         | NM_003878.1 | GGH         | 8  | Homo sapiens              | GH                           | 0.00033888 | 0.00458387 | 1.14142308 |
| UNC5A       | NM_133369.2 | UNC5A       | 5  | Homo sapiens              | UNC5H1; FLJ1                 | 0.00033373 | 0.00453273 | 1.3660458  |
| WDFY1       | NM_020830.3 | WDFY1       | 2  | Homo sapiens              | FENS-1; ZFYV                 | 0.00033162 | 0.004518   | 1.12906971 |
| GPA1        | NM_003801.2 | GPA1        | 8  | Homo sapiens              | hGAA1; GAA1                  | 0.00032997 | 0.0045047  | 1.2206939  |
|             | Hs.540335   | HS.540335   | 15 | UI-H-ED1-axx-k-12-0-UI.s1 | I                            | 0.00032941 | 0.00450173 | 2.07128075 |
| ADAT2       | NM_182503.2 | ADAT2       | 6  | Homo sapiens              | TAD2; dJ20N2                 | 0.00032746 | 0.0044797  | 3.02748053 |
| COX7A2L     | NM_004718.2 | COX7A2L     | 2  | Homo sapiens              | EB1; COX7RP;                 | 0.0003233  | 0.00445033 | 1.08432035 |
| ACSL3       | NM_004457.3 | ACSL3       | 2  | Homo sapiens              | PRO2194; FAC                 | 0.00032039 | 0.0044287  | 1.16523309 |
| MCOLN2      | NM_153259.2 | MCOLN2      | 1  | Homo sapiens              | TRP-ML2; TRP                 | 0.00031858 | 0.00441749 | 1.20325824 |
| IGF2R       | NM_000876.1 | IGF2R       | 6  | Homo sapiens              | M6P-R; CD222                 | 0.00031879 | 0.00441581 | 1.15226647 |
| HEYL        | NM_014571.2 | HEYL        | 1  | Homo sapiens              | MGC12623; H                  | 0.00031745 | 0.00440647 | 1.30188791 |
| LASS5       | NM_147190.1 | LASS5       | 12 | Homo sapiens              | Trh4; MGC454                 | 0.00031331 | 0.00436725 | 1.77230033 |
| GMPR        | NM_006877.2 | GMPR        | 6  | Homo sapiens              | GMPR1                        | 0.00031059 | 0.004343   | 1.52425971 |
| ZSCAN29     | NM_152455.2 | ZSCAN29     | 15 | Homo sapiens              | MGC129895; I                 | 0.00030922 | 0.00433297 | 7.15373283 |
| ITGA2       | NM_002203.2 | ITGA2       | 5  | Homo sapiens              | CD49B; VLAA                  | 0.00030819 | 0.00432307 | 1.43107075 |
| LOC729279   | XR_039753.1 | LOC729279   |    |                           | PREDICTED: Homo sapiens n    | 0.00030637 | 0.0043159  | 1.12045779 |
| ZMAT5       | NM_019103.2 | ZMAT5       | 22 | Homo sapiens              | zinc finger, ma              | 0.00030247 | 0.00427463 | 2.19836006 |
| HEBP1       | NM_015987.3 | HEBP1       | 12 | Homo sapiens              | HBP; HEBP                    | 0.00030114 | 0.00426483 | 1.184792   |
| GADD45B     | NM_015675.1 | GADD45B     | 19 | Homo sapiens              | MYD118; DKF                  | 0.00029901 | 0.00425287 | 1.88863673 |
| HEG1        | XM_087386.8 | HEG1        | 3  | Homo sapiens              | KIAA1237; MS                 | 0.00029534 | 0.00421429 | 16.708763  |
| CYTSA       | NM_015330.1 | CYTSA       | 22 | Homo sapiens              | KIAA0376                     | 0.00029172 | 0.00417603 | 1.19448382 |
| C9orf169    | NM_199001.1 | C9ORF169    |    |                           | Homo sapiens chromosome 9    | 0.00029192 | 0.00417443 | 1.73081285 |
| RNU1G2      | NR_004426.1 | RNU1G2      | 1  | Homo sapiens              | U1D2; U1B2;                  | 0.00029105 | 0.00417093 | 1.26627992 |
| ZNF1        | NM_021035.1 | ZNF1        | 20 | Homo sapiens              | MGC131926; I                 | 0.00028884 | 0.00415274 | 1.30324144 |
| ATP1B3      | NM_001679.2 | ATP1B3      |    |                           | PREDICTED: Homo sapiens A    | 0.00028585 | 0.00411427 | 1.105292   |
| FIG4        | NM_014845.4 | FIG4        | 6  | Homo sapiens              | SAC3; RP1-24                 | 0.00028386 | 0.00409897 | 1.43524054 |
| CALU        | NM_001219.2 | CALU        | 7  | Homo sapiens              | FLJ90608                     | 0.00028282 | 0.00409293 | 1.19535892 |
| TMTC4       | NM_032813.2 | TMTC4       | 13 | Homo sapiens              | FLJ22153; FLJ                | 0.00028099 | 0.00407533 | 9.73896138 |
| GFPT2       | NM_005110.1 | GFPT2       | 5  | Homo sapiens              | GFAT2; FLJ10                 | 0.00027847 | 0.00405649 | 16.9158825 |
| TMEM30A     | NM_018247.2 | TMEM30A     | 6  | Homo sapiens              | FLJ10856; C6                 | 0.00027765 | 0.00404895 | 1.32090013 |
| BNIP3L      | NM_004331.2 | BNIP3L      | 8  | Homo sapiens              | BNIP3a; NIX                  | 0.00027615 | 0.00404045 | 1.33899757 |
| CLSTN1      | NM_00100956 | CLSTN1      | 1  | Homo sapiens              | CSTN1; PIK3C                 | 0.00027489 | 0.00402644 | 1.16824736 |
| MPZL1       | NM_024569.3 | MPZL1       | 1  | Homo sapiens              | PZR; PZRa; PZ                | 0.00027253 | 0.00400959 | 1.40122816 |
| LOC10013424 | XM_00171742 | LOC10013424 |    |                           | PREDICTED: Homo sapiens h    | 0.00027148 | 0.00400309 | 1.70185164 |
| TMED3       | NM_007364.2 | TMED3       | 15 | Homo sapiens              | MGC133022; C                 | 0.00027068 | 0.00400008 | 1.10379108 |
| LOC340598   | XM_926996.1 | LOC340598   |    |                           | PREDICTED: Homo sapiens s    | 0.00026802 | 0.00396974 | 1.28742016 |
| SLC27A1     | NM_198580.1 | SLC27A1     | 19 | Homo sapiens              | FATP1; ACSVL                 | 0.00026825 | 0.00396869 | 1.27196731 |
| SH3BP4      | NM_014521.1 | SH3BP4      | 2  | Homo sapiens              | BOG25; TTP                   | 0.0002651  | 0.00394403 | 1.17878049 |
| KIF3B       | NM_004798.2 | KIF3B       | 20 | Homo sapiens              | HH0048; KIAA                 | 0.00026279 | 0.00392298 | 1.26730429 |
| RNU1A3      | NR_004430.1 | RNU1A3      | 1  | Homo sapiens              | HSD1; U1A1                   | 0.00026099 | 0.00390919 | 1.23159564 |
| INHBE       | NM_031479.3 | INHBE       | 12 | Homo sapiens              | MGC4638                      | 0.00025681 | 0.00386414 | 3.78789239 |
| ACY1        | NM_000666.1 | ACY1        | 3  | Homo sapiens              | ACY1D; ACYL                  | 0.0002562  | 0.00385928 | 1.50701759 |
| TK1         | NM_003258.1 | TK1         |    |                           | Homo sapiens TK2             | 0.00025506 | 0.00385085 | 1.08307042 |
| CBX7        | NM_175709.2 | CBX7        | 22 | Homo sapiens              | chromobox ho                 | 0.00025426 | 0.00384749 | 1.50644544 |
| GRK5        | NM_005308.2 | GRK5        | 10 | Homo sapiens              | GPRK5                        | 0.0002536  | 0.0038463  | 1.32292273 |
| NUDT18      | NM_024815.2 | NUDT18      | 8  | Homo sapiens              | FLJ22494                     | 0.00025166 | 0.00383013 | 1.40044144 |
| SEMA4F      | NM_004263.2 | SEMA4F      | 2  | Homo sapiens              | PRO2353; M-S                 | 0.0002474  | 0.00378267 | 1.3518269  |
| GAMT        | NM_138924.1 | GAMT        | 19 | Homo sapiens              | TP53I2; PIG2                 | 0.00024666 | 0.00377567 | 1.14501179 |
| WDR54       | NM_032118.2 | WDR54       | 2  | Homo sapiens              | FLJ12953                     | 0.00024544 | 0.00376568 | 1.14842287 |
| TTYH3       | NM_025250.2 | TTYH3       | 7  | Homo sapiens              | KIAA1691                     | 0.00024268 | 0.00372772 | 1.49620775 |
| MLF1        | NM_022443.2 | MLF1        | 3  | Homo sapiens              | myeloid leukel               | 0.00023972 | 0.00368653 | 1.63185523 |
| RAC2        | NM_002872.3 | RAC2        | 22 | Homo sapiens              | Gx; EN-7; HSI                | 0.00023463 | 0.00362078 | 1.09446717 |
| CABC1       | NM_020247.3 | CABC1       | 1  | Homo sapiens              | MGC4849; CO                  | 0.00023224 | 0.00359651 | 1.21787111 |
| LOC10013453 | XR_039501.1 | LOC10013453 |    |                           | PREDICTED: Homo sapiens n    | 0.00023265 | 0.00359447 | 1.15410565 |
| GSTT2       | NM_00108084 | GSTT2       |    |                           | Homo sapiens glutathione S-  | 0.00022832 | 0.00354407 | 1.97228489 |
| C4orf34     | NM_174921.1 | C4ORF34     | 4  | Homo sapiens              | FLJ13289                     | 0.00022353 | 0.0034779  | 1.14889506 |
| NAGK        | NM_017567.2 | NAGK        | 2  | Homo sapiens              | GNK; HSA242                  | 0.00022196 | 0.00347786 | 1.26017915 |
| FAM69B      | XM_942503.1 | FAM69B      |    |                           | PREDICTED: Homo sapiens fi   | 0.00022241 | 0.00347679 | 1.39253827 |
| RGS10       | NM_002925.3 | RGS10       | 10 | Homo sapiens              | regulator of G               | 0.00022205 | 0.00347514 | 1.1622785  |
| NICN1       | NM_032316.2 | NICN1       | 3  | Homo sapiens              | MGC12936                     | 0.0002194  | 0.00344591 | 1.85170372 |
| TMEM120A    | NM_031925.1 | TMEM120A    | 7  | Homo sapiens              | TMPT                         | 0.00021751 | 0.00342434 | 1.37932841 |
| C17orf96    | NM_00113067 | C17ORF96    |    |                           | Homo sapiens chromosome 1    | 0.00021525 | 0.00340488 | 1.20371019 |
| SKA2        | NM_182620.3 | SKA2        | 17 | Homo sapiens              | MGC110975; S                 | 0.00021285 | 0.00338313 | 1.18892166 |
| MYO19       | NM_00103358 | MYO19       | 17 | Homo sapiens              | FLJ22865; MY                 | 0.00021062 | 0.00335572 | 104.961519 |
| FAM120B     | NM_032448.1 | FAM120B     | 6  | Homo sapiens              | KIAA1838; dJ                 | 0.00020946 | 0.00334121 | 1.12680949 |
| SYN2        | NM_003178.3 | SYN2        | 3  | Homo sapiens              | SYNIIa; SYNII                | 0.00020891 | 0.00334056 | 1.86465893 |
| ENC1        | NM_003633.1 | ENC1        | 5  | Homo sapiens              | PIG10; NRPB;                 | 0.00020587 | 0.00330392 | 1.35882319 |

0.5 Upreg

|           |                       |   |                                 |            |            |            |
|-----------|-----------------------|---|---------------------------------|------------|------------|------------|
| USP46     | NM_022832.2 USP46     |   | 4 Homo sapiens FLJ12552         | 0.00020535 | 0.00329951 | 3.67679108 |
| LOC645487 | XM_932932.1 LOC645487 |   | 20 PREDICTED: Homo sapiens h    | 0.00020112 | 0.00324343 | 3.50189531 |
| DPYSL3    | NM_001387.2 DPYSL3    |   | 5 Homo sapiens DRP3; CRMP4      | 0.00019797 | 0.00320811 | 1.17329799 |
| RAB40B    | NM_006822.1 RAB40B    |   | 17 Homo sapiens FLJ42385; SE    | 0.00019674 | 0.00319608 | 1.17422609 |
| IFT52     | NM_016004.2 IFT52     |   | 20 Homo sapiens NGD5; CGI-53    | 0.00019234 | 0.00313616 | 1.6656417  |
| EFR3A     | NM_015137.1 EFR3A     |   | 8 Homo sapiens KIAA0143; DK     | 0.00019049 | 0.00312911 | 1.14359131 |
|           | Hs.371609 HS.371609   |   | 3 Homo sapiens cDNA clone IM    | 0.00019064 | 0.00312758 | 1.33321705 |
| BTBD10    | NM_032320.4 BTBD10    |   | 11 Homo sapiens MGC13007; G     | 0.0001878  | 0.00309632 | 1.28610786 |
| CYR61     | NM_001554.3 CYR61     |   | 1 Homo sapiens CCN1; IGFBP1     | 0.00018668 | 0.00309323 | 1.37726193 |
| SNORD3D   | NR_006882.1 SNORD3D   |   | 17 Homo sapiens U3-4            | 0.00018389 | 0.00306232 | 1.28509046 |
| TBCE      | NM_003193.3 TBCE      |   | 1 Homo sapiens KCS; KCS1; p     | 0.00018328 | 0.00305603 | 1.21645309 |
| SLC36A1   | NM_078483.2 SLC36A1   |   | 5 Homo sapiens TRAMD3; PAT      | 0.00018222 | 0.00304983 | 1.0882723  |
| HLTF      | NM_003071.2 HLTF      |   | 3 Homo sapiens ZBU1; SMAR       | 0.00017915 | 0.0030137  | 1.20623971 |
| IDH1      | NM_005896.2 IDH1      |   | 2 Homo sapiens PICD; IDH; ID    | 0.00017691 | 0.00299506 | 1.09539555 |
| GIPC1     | NM_202468.1 GIPC1     |   | 19 Homo sapiens IIP-1; TIP-2; C | 0.00017704 | 0.0029896  | 1.14051102 |
| LOC388588 | XM_946205.1 LOC388588 |   | 1 PREDICTED: Homo sapiens h     | 0.00017583 | 0.00298431 | 1.87633023 |
| YIF1B     | NM_00103173 YIF1B     |   | 19 Homo sapiens FinGER8         | 0.0001745  | 0.00296558 | 1.22940745 |
| SNTA1     | NM_003098.2 SNTA1     |   | 20 Homo sapiens SNT1; dJ1187    | 0.00017237 | 0.00294825 | 1.65618367 |
| CHAF1A    | NM_005483.2 CHAF1A    |   | 19 Homo sapiens MGC71229; C     | 0.00017143 | 0.00293976 | 50.7724031 |
| PRF1      | NM_005041.3 PRF1      |   | 10 Homo sapiens HPLH2; FLH2;    | 0.00017004 | 0.00291982 | 2.88171465 |
| RGS2      | NM_002923.1 RGS2      |   | 1 Homo sapiens G0S8             | 0.00016778 | 0.00289599 | 1.21990933 |
| NPC1      | NM_000271.1 NPC1      |   | 18 Homo sapiens NPC             | 0.000168   | 0.00289228 | 1.20769839 |
| PINK1     | NM_032409.1 PINK1     |   | 1 Homo sapiens FLJ27236; PA     | 0.00016465 | 0.00284943 | 1.31443718 |
| VASH1     | NM_014909.2 VASH1     |   | 14 Homo sapiens KIAA1036        | 0.00016102 | 0.00280489 | 1.70921223 |
| C1orf53   | NM_00102459 C1ORF53   |   | 1 Homo sapiens chromosome 1     | 0.00016105 | 0.00280171 | 1.57226564 |
| LPXN      | NM_004811.1 LPXN      |   | 11 Homo sapiens LDPL            | 0.00016008 | 0.00279212 | 2.49658511 |
| CENPF     | NM_016343.3 CENPF     |   | 1 Homo sapiens PRO1779; hcp     | 0.0001569  | 0.00274023 | 1.16517241 |
| RAB6B     | NM_016577.2 RAB6B     |   | 3 Homo sapiens RAB6B, memb      | 0.00015333 | 0.00270281 | 5.10284712 |
|           | Hs.4988 HS.4988       |   | 2 Homo sapiens mRNA; cDNA I     | 0.00015246 | 0.00269832 | 1.36905436 |
| LMBRD1    | NM_018368.2 LMBRD1    |   | 6 Homo sapiens ba810122.1; F    | 0.00015167 | 0.00268785 | 1.23457318 |
| ATP6AP2   | NM_005765.2 ATP6AP2   | X | Homo sapiens ELDF10; APT6       | 0.00015109 | 0.00268118 | 1.10201313 |
| DYNC1H1   | NM_001376.2 DYNC1H1   |   | 14 Homo sapiens DNECL; DNCH     | 0.00014933 | 0.00267136 | 1.12348485 |
| C4orf14   | NM_032313.2 C4ORF14   |   | 4 Homo sapiens mAtnOS1; hA      | 0.0001488  | 0.00266544 | 1.12363742 |
| KRT8      | NM_002273.2 KRT8      |   | 12 Homo sapiens CYK8; KO; K8    | 0.0001484  | 0.002662   | 1.1335636  |
| PVRL2     | NM_00104272 PVRL2     |   | 19 Homo sapiens PVRR2; HVEB;    | 0.00014577 | 0.00263257 | 1.42639684 |
| EGR1      | NM_001964.2 EGR1      |   | 5 Homo sapiens G0S30; AT225     | 0.00014448 | 0.00261286 | 1.1225894  |
| ZCCHC14   | NM_015144.1 ZCCHC14   |   | 16 Homo sapiens MGC126527; I    | 0.0001438  | 0.00260676 | 1.22822191 |
| C7orf70   | XM_935791.1 C7ORF70   |   | 7 Homo sapiens chromosome 7     | 0.00014351 | 0.00260603 | 1.32755392 |
| SH3PXD2A  | NM_014631.2 SH3PXD2A  |   | 10 Homo sapiens SH3MD1; FIS     | 0.00014222 | 0.00258973 | 1.43231572 |
| FBXL2     | NM_012157.2 FBXL2     |   | 3 Homo sapiens FBL2; FBL3; D    | 0.00014041 | 0.00256726 | 1.51784325 |
| RHOB      | NM_004040.2 RHOB      |   | 2 Homo sapiens ARHG; MST08      | 0.00013965 | 0.00256044 | 1.12846661 |
| UROS      | NM_000375.1 UROS      |   | 10 Homo sapiens uroporphyrino   | 0.00013891 | 0.00255391 | 1.15771117 |
| RHBDD2    | NM_00104045 RHBDD2    |   | 7 Homo sapiens NPD007; RHBI     | 0.00013524 | 0.00251437 | 1.12994553 |
| ATXN1     | NM_000332.2 ATXN1     |   | 6 Homo sapiens SCA1; D6S50      | 0.00013369 | 0.00249246 | 1.49999647 |
| EIF1AD    | NM_032325.2 EIF1AD    |   | 11 Homo sapiens eukaryotic tra  | 0.00013207 | 0.00247283 | 6.59800953 |
| TBPL1     | NM_004865.2 TBPL1     |   | 6 Homo sapiens TRF2; STUD; I    | 0.00012963 | 0.002434   | 1.17125582 |
| CDC20B    | NM_152623.1 CDC20B    |   | 5 Homo sapiens FLJ37927; G6'    | 0.00012825 | 0.00241153 | 2.45022999 |
| LOC729843 | NM_012477.2 LOC729843 |   | 2 PREDICTED: Homo sapiens s     | 0.00012714 | 0.0023974  | 1.16942593 |
| GPRIN1    | NM_052899.1 GPRIN1    |   | 5 Homo sapiens KIAA1893; GR     | 0.00012441 | 0.00235588 | 13.7579343 |
| LOC399748 | XR_018212.1 LOC399748 |   | PREDICTED: Homo sapiens n       | 0.00012245 | 0.00232886 | 1.1418359  |
| RIMS3     | NM_014747.2 RIMS3     |   | 1 Homo sapiens RIM3; NIM3; I    | 0.00011655 | 0.00224897 | 1.41520251 |
| GLG1      | NM_012201.4 GLG1      |   | 16 Homo sapiens CFR-1; FLJ23    | 0.00011702 | 0.00224488 | 1.09305111 |
| APBB3     | NM_006051.2 APBB3     |   | 5 Homo sapiens MGC87674; SI     | 0.00011581 | 0.00224121 | 1.21823203 |
| LAMC1     | NM_002293.2 LAMC1     |   | 1 Homo sapiens LAMB2; MGC8      | 0.00011547 | 0.00224118 | 1.13563699 |
| NOXA1     | NM_006647.1 NOXA1     |   | 9 Homo sapiens MGC131800; I     | 0.0001156  | 0.00224042 | 1.51996823 |
| CPNE1     | NM_003915.2 CPNE1     |   | 20 Homo sapiens CPN1; COPN1;    | 0.00011348 | 0.00221223 | 1.1684906  |
| CDKN1C    | NM_000076.1 CDKN1C    |   | 11 Homo sapiens BWCR; p57; B    | 0.00010851 | 0.00213413 | 2.02581047 |
| WNT3A     | NM_033131.2 WNT3A     |   | 1 Homo sapiens MGC119419; I     | 0.00010795 | 0.0021327  | 1.77006685 |
| CMTM6     | NM_017801.2 CMTM6     |   | 3 Homo sapiens FLJ20396; CKI    | 0.00010709 | 0.00212198 | 1.17938479 |
| CAPN5     | NM_004055.3 CAPN5     |   | 11 Homo sapiens HTRA3; FLJ46    | 0.00010587 | 0.00211671 | 1.87837241 |
|           | Hs.19339 HS.19339     |   | 3 Homo sapiens cDNA clone IM    | 0.00010608 | 0.00211451 | 1.35611417 |
| CCDC92    | NM_025140.1 CCDC92    |   | 12 Homo sapiens FLJ22471        | 0.00010589 | 0.00211399 | 4.86454034 |
| MGC18216  | XM_927732.1 MGC18216  |   | 15 PREDICTED: Homo sapiens h    | 0.00010464 | 0.00210166 | 3.92568978 |
| RNFT2     | NM_032814.3 RNFT2     |   | 12 Homo sapiens FLJ14627; TM    | 0.00010367 | 0.0020854  | 1.27586413 |
| PSCD1     | NM_017456.1 PSCD1     |   | 17 Homo sapiens D17S811E; B2    | 0.0001035  | 0.002085   | 1.23198644 |
| APLP1     | NM_005166.3 APLP1     |   | 19 Homo sapiens APLP            | 0.00010301 | 0.00207837 | 4.88731948 |
| FAM116B   | NM_00100179 FAM116B   |   | Homo sapiens MGC33692           | 0.0001014  | 0.00205847 | 1.61121809 |
| PI4KAP2   | NM_199345.2 PI4KAP2   |   | Homo sapiens FLJ44912; MG       | 0.0001012  | 0.00205747 | 1.16331412 |
| ST3GAL5   | NM_003896.2 ST3GAL5   |   | 2 Homo sapiens SIAT9; ST3Ga     | 0.00010099 | 0.00205633 | 1.64762718 |
| SRPX      | NM_006307.2 SRPX      | X | Homo sapiens DRS; ETX1          | 0.00010077 | 0.0020551  | 1.14476315 |



0.5 Upreg

|           |             |           |    |                           |                 |            |            |            |
|-----------|-------------|-----------|----|---------------------------|-----------------|------------|------------|------------|
| ASAP2     | NM_003887.2 | ASAP2     | 2  | Homo sapiens              | ArfGAP with S   | 9.9047E-05 | 0.00202932 | 1.4380021  |
| MICAL1    | NM_022765.2 | MICAL1    | 6  | Homo sapiens              | NICAL; DKFZp    | 9.8228E-05 | 0.00202192 | 2.42456045 |
| LDLR      | NM_000527.2 | LDLR      | 19 | Homo sapiens              | FHC; FH         | 9.6176E-05 | 0.00198894 | 1.10388277 |
| OBFC1     | NM_024928.3 | OBFC1     | 10 | Homo sapiens              | ba541N10.2; I   | 9.6311E-05 | 0.00198862 | 1.22104766 |
| HIST1H2BK | NM_080593.1 | HIST1H2BK | 6  | Homo sapiens              | MGC131989; I    | 9.5392E-05 | 0.0019758  | 1.17598563 |
| CDC14B    | NM_033332.1 | CDC14B    | 9  | Homo sapiens              | CDC14B3; hCl    | 9.4199E-05 | 0.00196029 | 1.49798776 |
| C17orf61  | NM_152766.2 | C17ORF61  | 17 | Homo sapiens              | MGC40107        | 9.1517E-05 | 0.00192564 | 1.09556927 |
| ETS1      | NM_005238.1 | ETS1      | 11 | Homo sapiens              | FLJ10768; ETS   | 9.1167E-05 | 0.00192437 | 1.36079692 |
| CGNL1     | NM_032866.3 | CGNL1     | 15 | Homo sapiens              | MGC138254; I    | 8.8908E-05 | 0.0018827  | 1.53446285 |
| CREB3L2   | NM_194071.2 | CREB3L2   | 7  | Homo sapiens              | MGC131709; I    | 8.8311E-05 | 0.00187303 | 1.22853852 |
| ATP6V0A1  | NM_005177.2 | ATP6V0A1  | 17 | Homo sapiens              | ATP6N1; VPP1    | 8.7905E-05 | 0.00186741 | 1.12453018 |
| KRT18P28  | XR_017689.1 | KRT18P28  | 1  | PREDICTED: Homo sapiens n |                 | 8.7356E-05 | 0.00185874 | 1.41010146 |
| CCDC23    | NM_199342.1 | CCDC23    | 1  | Homo sapiens              | coiled-coil don | 8.6914E-05 | 0.00185827 | 1.14496963 |
| RPS28     | NM_001031.4 | RPS28     | 19 | Homo sapiens              | ribosomal prot  | 8.6934E-05 | 0.00185572 | 1.07136112 |
| ADD3      | NM_019903.3 | ADD3      | 10 | Homo sapiens              | ADDL            | 8.6293E-05 | 0.00184797 | 1.29295207 |
| TM7SF2    | NM_003273.1 | TM7SF2    | 11 | Homo sapiens              | ANG1; DHCR1     | 8.2681E-05 | 0.00177637 | 1.20854041 |
| GLB1L2    | NM_138342.2 | GLB1L2    | 11 | Homo sapiens              | MST114; MSTI    | 8.1493E-05 | 0.0017594  | 1.55181789 |
| CLYBL     | NM_138280.3 | CLYBL     | 13 | Homo sapiens              | ba134015.1; I   | 8.0784E-05 | 0.00174693 | 1.33818192 |
| MXD4      | NM_006454.2 | MXD4      | 4  | Homo sapiens              | MSTP149; MAI    | 7.9836E-05 | 0.00174064 | 1.28426371 |
| LOC643431 | XM_928128.1 | LOC643431 | 5  | PREDICTED: Homo sapiens s |                 | 8.0009E-05 | 0.00173868 | 1.20595913 |
| GRIN1     | NM_000832.5 | GRIN1     | 9  | Homo sapiens              | NMDAR1; NMI     | 8.0016E-05 | 0.001736   | 1.50311803 |
| TMEM132A  | NM_178031.2 | TMEM132A  | 11 | Homo sapiens              | DKFZp547E21     | 8.0068E-05 | 0.00173428 | 1.29927478 |
| GPC4      | NM_001448.2 | GPC4      |    | Homo sapiens              | K-glypican      | 7.8179E-05 | 0.00171297 | 1.35224801 |
| TERC      | NR_001566.1 | TERC      | 3  | Homo sapiens              | TRC3; TR; hTF   | 7.5715E-05 | 0.00167279 | 1.44566043 |
| CDC6      | NM_001254.3 | CDC6      | 17 | Homo sapiens              | HsCDC18; HsC    | 7.1468E-05 | 0.00161946 | 3.1009135  |
| UBE2L6    | NM_198183.1 | UBE2L6    | 11 | Homo sapiens              | UBCH8; RIG-B    | 7.1328E-05 | 0.00161906 | 1.39387522 |
| TMEM2     | NM_013390.1 | TMEM2     | 9  | Homo sapiens              | transmembrar    | 7.2087E-05 | 0.0016169  | 2.10117648 |
| FAM43A    | NM_153690.4 | FAM43A    | 3  | Homo sapiens              | FLJ90022        | 7.0461E-05 | 0.00160763 | 2.06414609 |
| KCNS3     | NM_002252.3 | KCNS3     | 2  | Homo sapiens              | MGC9481; KV'    | 6.8939E-05 | 0.00158381 | 2.02579884 |
| ESAM      | NM_138961.1 | ESAM      | 11 | Homo sapiens              | W117m           | 6.8631E-05 | 0.00157947 | 6.33484235 |
| HLA-H     | NR_001434.1 | HLA-H     | 6  | Homo sapiens              | HLAHP           | 6.8041E-05 | 0.00157683 | 1.20509753 |
| AMOT      | NM_133265.2 | AMOT      |    | Homo sapiens              | KIAA1071        | 6.8259E-05 | 0.00157638 | 2.03529839 |
| GLDN      | NM_181789.1 | GLDN      | 15 | Homo sapiens              | CRG-L2; UNC-    | 6.6766E-05 | 0.00156094 | 1.95047553 |
| TMEM175   | NM_032326.2 | TMEM175   | 4  | Homo sapiens              | MGC4618         | 6.7113E-05 | 0.00156079 | 1.38272906 |
| CYFIP2    | NM_00103733 | CYFIP2    | 5  | Homo sapiens              | PIR121          | 6.6299E-05 | 0.00155827 | 1.32419311 |
| ZNF277    | NM_021994.1 | ZNF277    | 7  | Homo sapiens              | ZNF277P; ZNF    | 6.3781E-05 | 0.00152339 | 1.237046   |
| BCL6      | NM_001706.2 | BCL6      | 3  | Homo sapiens              | ZBTB27; ZNF5    | 6.3823E-05 | 0.00152164 | 1.55159155 |
| ATP6AP1L  | NM_00101797 | ATP6AP1L  | 5  | Homo sapiens              | MGC138396       | 6.2812E-05 | 0.00150841 | 2.35745437 |
| SOX9      | NM_000346.2 | SOX9      | 17 | Homo sapiens              | COMP1; CMD1     | 6.2878E-05 | 0.00150725 | 1.15387005 |
| SLC9A3R1  | NM_004252.1 | SLC9A3R1  | 17 | Homo sapiens              | NHERF1; NHEI    | 5.9983E-05 | 0.00145097 | 1.14107491 |
| LPCAT3    | NM_005768.5 | LPCAT3    | 12 | Homo sapiens              | C3F; OACT5; r   | 5.9579E-05 | 0.00144913 | 1.21512547 |
| RIOK3     | NM_003831.2 | RIOK3     | 18 | Homo sapiens              | DKFZp779L13     | 5.8505E-05 | 0.00142826 | 1.27777901 |
| SLC25A4   | NM_001151.2 | SLC25A4   | 4  | Homo sapiens              | PEO2; ANT1; I   | 5.7959E-05 | 0.00142279 | 1.15962641 |
| SMYD3     | NM_022743.1 | SMYD3     | 1  | Homo sapiens              | ba74P14.1; ZI   | 5.7571E-05 | 0.00141851 | 1.25701591 |
| LOC646723 | NM_199187.1 | LOC646723 | 5  | PREDICTED: Homo sapiens s |                 | 5.7643E-05 | 0.00141767 | 1.17564885 |
| KDM5B     | NM_006618.3 | KDM5B     | 1  | Homo sapiens              | FLJ23670; FLJ   | 5.6779E-05 | 0.00141212 | 1.46006336 |
| APLP2     | NM_001642.1 | APLP2     | 11 | Homo sapiens              | CDEBP; APPH;    | 5.6228E-05 | 0.00140899 | 1.33326048 |
| XPR1      | NM_004736.3 | XPR1      | 1  | Homo sapiens              | xenotropic anc  | 5.6282E-05 | 0.0014077  | 1.22951058 |
| ATOX1     | NM_004045.3 | ATOX1     | 5  | Homo sapiens              | MGC138453; I    | 5.5711E-05 | 0.001404   | 1.17288221 |
| LITAF     | NM_004862.2 | LITAF     | 16 | Homo sapiens              | MGC125274; I    | 5.5805E-05 | 0.00140371 | 1.12309227 |
| SNX1      | NM_003099.3 | SNX1      | 15 | Homo sapiens              | SNX1A; Vps5;    | 5.4465E-05 | 0.00138047 | 2.6491677  |
| SLC22A18  | NM_002555.3 | SLC22A18  | 11 | Homo sapiens              | IMPT1; ORCTL    | 5.3621E-05 | 0.0013643  | 1.73139859 |
| CSRP1     | NM_004078.1 | CSRP1     | 1  | Homo sapiens              | CRP; CRP1; DI   | 5.3021E-05 | 0.00135685 | 1.27884863 |
| DHDH      | NM_014475.2 | DHDH      | 19 | Homo sapiens              | HUM2DD          | 5.1759E-05 | 0.00133747 | 1.60311421 |
| MOSPD1    | NM_019556.1 | MOSPD1    |    | Homo sapiens              | DJ473B4         | 5.1508E-05 | 0.00133358 | 1.59091923 |
| PACSIN2   | NM_007229.2 | PACSIN2   | 22 | Homo sapiens              | SDPII           | 5.0947E-05 | 0.00132422 | 1.17364506 |
| ACAA2     | NM_006111.1 | ACAA2     | 18 | Homo sapiens              | DSAEC           | 5.0328E-05 | 0.00131327 | 1.82241182 |
| STAT2     | NM_005419.2 | STAT2     | 12 | Homo sapiens              | ISGF-3; STAT1   | 4.9614E-05 | 0.00130492 | 1.24830846 |
| OPTN      | NM_00100821 | OPTN      | 10 | Homo sapiens              | cDNA FLJ4005    | 4.9751E-05 | 0.00130336 | 3.10418786 |
| SND1      | NM_014390.2 | SND1      | 7  | Homo sapiens              | FIP2; HYPL; N   | 4.9159E-05 | 0.00129554 | 1.91416943 |
| DENND5B   | NM_144973.2 | DENND5B   | 7  | Homo sapiens              | TDRD11; p10     | 4.8543E-05 | 0.00128441 | 1.24851831 |
| ARHGEF3   | NM_019555.1 | ARHGEF3   | 12 | Homo sapiens              | FLJ41648; DK    | 4.8333E-05 | 0.0012814  | 1.49499876 |
| TUFT1     | NM_020127.1 | TUFT1     | 3  | Homo sapiens              | DKFZP434F24     | 4.7539E-05 | 0.00126541 | 1.2142395  |
| CHD7      | NM_017780.2 | CHD7      | 1  | Homo sapiens              | tuftelin 1 (TUF | 4.7102E-05 | 0.00126394 | 1.46400374 |
| LGMN      | NM_005606.5 | LGMN      | 8  | Homo sapiens              | FLJ20361; KIA   | 4.6069E-05 | 0.00125917 | 1.25653786 |
| FLJ20021  | XM_028217.4 | FLJ20021  | 14 | Homo sapiens              | AEP; LGMN1; I   | 4.6145E-05 | 0.00125863 | 1.30793551 |
| ARL3      | NM_004311.2 | ARL3      | 4  | PREDICTED: Homo sapiens h |                 | 4.6451E-05 | 0.00125663 | 1.28954178 |
| KRT8P9    | XR_017231.2 | KRT8P9    | 10 | Homo sapiens              | ARFL3           | 4.4853E-05 | 0.00123099 | 1.65766414 |
| FAM46B    | NM_052943.2 | FAM46B    | 15 | PREDICTED: Homo sapiens n |                 | 4.4434E-05 | 0.00122202 | 1.36632556 |
|           |             |           | 1  | Homo sapiens              | MGC16491; M     | 4.3498E-05 | 0.00120128 | 1.6049621  |

0.5 Upreg

|           |             |           |    |                         |                         |              |            |            |
|-----------|-------------|-----------|----|-------------------------|-------------------------|--------------|------------|------------|
| FLNC      | NM_001458.2 | FLNC      | 7  | Homo sapiens            | FLN2; ABPL; A           | 4.3362E-05   | 0.0012     | 1.20351749 |
| SOX4      | NM_003107.2 | SOX4      | 6  | Homo sapiens            | EVI16                   | 4.1359E-05   | 0.00116154 | 1.19505446 |
| MPP1      | NM_002436.2 | MPP1      |    |                         | Homo sapiens            | AAG12; EMP5! | 4.0772E-05 | 0.00115239 |
| ASMTL     | XM_942506.1 | ASMTL     |    |                         | PREDICTED: Homo sapiens | a            | 3.8447E-05 | 0.00110075 |
| HLA-A     | NM_002116.5 | HLA-A     | 6  | Homo sapiens            | major histocor          |              | 3.8166E-05 | 0.00109746 |
| TPRG1L    | NM_182752.3 | TPRG1L    | 1  | Homo sapiens            | RP11-46F15.3            |              | 3.7661E-05 | 0.00109004 |
| GPSM2     | NM_013296.3 | GPSM2     | 1  | Homo sapiens            | Pins; LGN               |              | 3.7689E-05 | 0.00108847 |
| GSDMB     | NM_018530.1 | GSDMB     | 17 | Homo sapiens            | PRO2521; PP4            |              | 3.7351E-05 | 0.00108343 |
| ACTA2     | NM_001613.1 | ACTA2     | 10 | Homo sapiens            | ACTSA                   |              | 3.6865E-05 | 0.00107639 |
| RHOC      | NM_175744.3 | RHOC      | 1  | Homo sapiens            | H9; ARHC; MC            |              | 3.5452E-05 | 0.00103972 |
| RCOR2     | NM_173587.2 | RCOR2     | 11 | Homo sapiens            | REST corepres           |              | 3.4939E-05 | 0.00103152 |
| NAV3      | NM_014903.3 | NAV3      | 12 | Homo sapiens            | unc53H3; STE            |              | 3.4691E-05 | 0.00102877 |
| TSPAN9    | NM_006675.3 | TSPAN9    | 12 | Homo sapiens            | PP1057; NET-!           |              | 3.4506E-05 | 0.00102788 |
| FYCO1     | NM_024513.1 | FYCO1     | 3  | Homo sapiens            | FLJ13335; RU!           |              | 3.4148E-05 | 0.00102412 |
| LOC730081 | XR_041261.1 | LOC730081 |    |                         | PREDICTED: Homo sapiens | n            | 3.3389E-05 | 0.00100364 |
| ABCY9     | NM_203444.1 | ABCY9     | 12 | Homo sapiens            | TAPL; KIAA15!           |              | 3.3124E-05 | 0.00099794 |
| MMD       | NM_012329.2 | MMD       | 17 | Homo sapiens            | PAQR11; MMA             |              | 3.2501E-05 | 0.0009859  |
| LAMB2     | NM_002292.2 | LAMB2     | 3  | Homo sapiens            | LAMS                    |              | 3.1634E-05 | 0.00096622 |
| SLC44A3   | NM_152369.2 | SLC44A3   | 1  | Homo sapiens            | CTL3; MGC45!            |              | 2.9902E-05 | 0.00092398 |
| STAT4     | NM_003151.2 | STAT4     | 2  | Homo sapiens            | signal transdu          |              | 2.9516E-05 | 0.00091632 |
| PIP4K2A   | NM_005028.4 | PIP4K2A   | 10 | Homo sapiens            | PIP5KII-alpha;          |              | 2.9556E-05 | 0.00091541 |
| RABAC1    | NM_006423.1 | RABAC1    | 19 | Homo sapiens            | PRAF1; PRA1;            |              | 2.9062E-05 | 0.00090861 |
| LMTK3     | XM_936372.1 | LMTK3     |    |                         | PREDICTED: Homo sapiens | h            | 2.8891E-05 | 0.00090754 |
| SLC22A17  | NM_016609.3 | SLC22A17  | 14 | Homo sapiens            | BOIT; BOCT; h           |              | 2.8308E-05 | 0.00089988 |
| CDK5      | NM_004935.2 | CDK5      | 7  | Homo sapiens            | PSSALRE                 |              | 2.8339E-05 | 0.00089872 |
| FGFR3     | NM_000142.2 | FGFR3     | 4  | Homo sapiens            | HSFGFR3EX; J            |              | 2.7808E-05 | 0.00089039 |
| TMEM98    | NM_015544.2 | TMEM98    | 17 | Homo sapiens            | DKFZP564K19             |              | 2.7633E-05 | 0.00088909 |
| LHPP      | NM_022126.2 | LHPP      | 10 | Homo sapiens            | MGC142189; I            |              | 2.6668E-05 | 0.00086434 |
| ALDOC     | NM_005165.2 | ALDOC     | 17 | Homo sapiens            | ALDC                    |              | 2.6587E-05 | 0.00086382 |
| NEURL1B   | NM_00114265 | NEURL1B   | 5  | Homo sapiens            | neuralized hor          |              | 2.6443E-05 | 0.00086125 |
| AK1       | NM_000476.1 | AK1       | 9  | Homo sapiens            | adenylate kin           |              | 2.6123E-05 | 0.00085293 |
| FLNB      | NM_001457.1 | FLNB      | 3  | Homo sapiens            | FLN1L; filamin          |              | 2.5978E-05 | 0.00085027 |
| LOC399965 | XR_036921.1 | LOC399965 |    |                         | PREDICTED: Homo sapiens | n            | 2.5558E-05 | 0.00083861 |
| CBR4      | NM_032783.3 | CBR4      | 4  | Homo sapiens            | FLJ14431                |              | 2.5178E-05 | 0.00083026 |
| PSAP      | NM_002778.1 | PSAP      | 10 | Homo sapiens            | GLBA; SAP1; I           |              | 2.4822E-05 | 0.00082467 |
| CTGLF7    | XM_00171478 | CTGLF7    | 10 | PREDICTED: Homo sapiens | c                       |              | 2.4832E-05 | 0.00082294 |
|           | Hs.505676   | HS.505676 | 12 | Homo sapiens            | cDNA FLJ3377            |              | 2.4012E-05 | 0.00081199 |
| SLC29A4   | NM_00104066 | SLC29A4   | 7  | Homo sapiens            | PMAT; FLJ349!           |              | 2.384E-05  | 0.00081031 |
| CITED2    | NM_006079.3 | CITED2    | 6  | Homo sapiens            | P35SRJ; MRG1            |              | 2.375E-05  | 0.00080934 |
| VASN      | NM_138440.1 | VASN      | 16 | Homo sapiens            | SPLITL2                 |              | 2.2722E-05 | 0.00078439 |
| CDA       | NM_001785.1 | CDA       | 1  | Homo sapiens            | CDD                     |              | 2.2261E-05 | 0.00077861 |
| SH3BGRL2  | NM_031469.1 | SH3BGRL2  | 6  | Homo sapiens            | FLJ90025                |              | 2.1472E-05 | 0.000757   |
| LRRC20    | NM_207119.1 | LRRC20    | 10 | Homo sapiens            | FLJ10751; FLJ           |              | 2.1406E-05 | 0.00075668 |
| GAA       | NM_000152.2 | GAA       | 17 | Homo sapiens            | LYAG                    |              | 2.1187E-05 | 0.00075297 |
| KRT18P13  | XM_00172695 | KRT18P13  | 9  | PREDICTED: Homo sapiens | k                       |              | 2.104E-05  | 0.00074974 |
| PPP1R14C  | NM_030949.1 | PPP1R14C  | 6  | Homo sapiens            | KEPI; NY-BR-8           |              | 2.0878E-05 | 0.000748   |
| C11orf74  | NM_138787.2 | C11orf74  | 11 | Homo sapiens            | FLJ38678                |              | 2.091E-05  | 0.00074712 |
| COBL      | NM_015198.2 | COBL      | 7  | Homo sapiens            | DKFZp686G13             |              | 2.0413E-05 | 0.00074544 |
| CREG1     | NM_003851.2 | CREG1     | 1  | Homo sapiens            | CREG                    |              | 2.0688E-05 | 0.00074521 |
| ID2       | NM_002166.4 | ID2       | 2  | Homo sapiens            | GIG8; MGC26!            |              | 2.0165E-05 | 0.00073842 |
| HSDL2     | NM_032303.2 | HSDL2     | 9  | Homo sapiens            | MGC10940; C!            |              | 1.9899E-05 | 0.00073273 |
| KLF6      | NM_001300.4 | KLF6      | 10 | Homo sapiens            | GBF; ZF9; STJ           |              | 1.8191E-05 | 0.00068898 |
| PLOD2     | NM_182943.2 | PLOD2     | 3  | Homo sapiens            | LH2; TLH                |              | 1.8211E-05 | 0.00068775 |
| GPRC5A    | NM_003979.3 | GPRC5A    | 12 | Homo sapiens            | RAIG1; RAI3;            |              | 1.7952E-05 | 0.00068384 |
| CHCHD7    | NM_00101167 | CHCHD7    | 8  | Homo sapiens            | FLJ40966; MG            |              | 1.7797E-05 | 0.00067988 |
| SORL1     | NM_003105.3 | SORL1     | 11 | Homo sapiens            | LR11; LRP9; S           |              | 1.7569E-05 | 0.00067312 |
| NES       | NM_006617.1 | NES       | 1  | Homo sapiens            | FLJ21841; Nbl           |              | 1.6931E-05 | 0.00065433 |
| REEP1     | NM_022912.1 | REEP1     | 2  | Homo sapiens            | SPG31; C2orf!           |              | 1.6963E-05 | 0.00065365 |
| WBSCR16   | XM_933544.1 | WBSCR16   | 7  | Homo sapiens            | DKFZp434D04             |              | 1.6245E-05 | 0.00063712 |
| ZMIZ2     | NM_031449.3 | ZMIZ2     | 7  | Homo sapiens            | DKFZp761I21!            |              | 1.4396E-05 | 0.00058183 |
| GALK1     | NM_000154.1 | GALK1     | 17 | Homo sapiens            | GALK; GK1               |              | 1.3905E-05 | 0.00057067 |
| HS1BP3    | NM_022460.3 | HS1BP3    | 2  | Homo sapiens            | ETM2; FLJ142!           |              | 1.3665E-05 | 0.00056962 |
| CYP26B1   | NM_019885.2 | CYP26B1   | 2  | Homo sapiens            | CYP26A2; MG!            |              | 1.3693E-05 | 0.00056899 |
| LOC151162 | NR_024275.1 | LOC151162 | 2  | Homo sapiens            | hypothetical L!         |              | 1.2962E-05 | 0.00054546 |
| TMEM59L   | NM_012109.2 | TMEM59L   | 19 | Homo sapiens            | BSMAP; C19or            |              | 1.2819E-05 | 0.00054289 |
| CACNB3    | NM_000725.2 | CACNB3    | 12 | Homo sapiens            | CACNLB3                 |              | 1.2724E-05 | 0.00054062 |
| GNG7      | NM_052847.1 | GNG7      | 19 | Homo sapiens            | FLJ00058                |              | 1.2595E-05 | 0.00053686 |
| GLIPR2    | NM_022343.2 | GLIPR2    | 9  | Homo sapiens            | GLIPR2; GAPR            |              | 1.2357E-05 | 0.00053356 |
| HCP5      | NM_006674.2 | HCP5      | 6  | Homo sapiens            | P5-1; D6S265            |              | 1.242E-05  | 0.00053279 |
| TST       | NM_003312.4 | TST       | 22 | Homo sapiens            | MGC19578; RI            |              | 1.2373E-05 | 0.00053252 |

0.5 Upreg

|             |                         |                                  |            |            |            |
|-------------|-------------------------|----------------------------------|------------|------------|------------|
| CNFN        | NM_032488.2 CNFN        | 19 Homo sapiens PLAC8L2          | 1.2275E-05 | 0.00053174 | 1.69408489 |
| SKAP2       | NM_003930.3 SKAP2       | 7 Homo sapiens RA70; SCAP2;      | 1.2176E-05 | 0.00052918 | 1.6062086  |
| HLA-F       | NM_018950.1 HLA-F       | 6 Homo sapiens HLA-5.4; HLA-F    | 1.1182E-05 | 0.00049907 | 1.36727327 |
|             | Hs.547601 HS.547601     | 22 Homo sapiens full length inse | 1.1238E-05 | 0.00049822 | 3.18955504 |
| FAM149B1    | NM_173348.1 FAM149B1    | 10 Homo sapiens family with se   | 1.1055E-05 | 0.00049677 | 1.86770603 |
| LOC647954   | XM_938141.1 LOC647954   | PREDICTED: Homo sapiens n        | 1.1067E-05 | 0.00049562 | 1.23918443 |
| GSTM1       | NM_000561.2 GSTM1       | 1 Homo sapiens MGC26563; G       | 1.0972E-05 | 0.00049473 | 4.2638243  |
| MYO1D       | NM_015194.1 MYO1D       | 17 Homo sapiens KIAA0727; my     | 1.0422E-05 | 0.00047477 | 2.02285651 |
| IRX3        | NM_024336.1 IRX3        | 16 Homo sapiens IRX-1            | 1.0434E-05 | 0.00047367 | 1.86908103 |
| SLC2A1      | NM_006516.1 SLC2A1      | 1 Homo sapiens MGC141895; I      | 1.0246E-05 | 0.00047161 | 1.1233679  |
| SOX8        | NM_014587.2 SOX8        | 16 Homo sapiens MGC24837         | 1.0167E-05 | 0.00046958 | 1.58399031 |
| MAPT        | NM_016841.2 MAPT        | 17 Homo sapiens MTBT2; MAPTI     | 1.0272E-05 | 0.00046954 | 1.77504778 |
| CYP2R1      | NM_024514.4 CYP2R1      | 11 Homo sapiens MGC4663          | 1.0095E-05 | 0.00046792 | 2.0088861  |
| OLFML2A     | NM_182487.1 OLFML2A     | 9 Homo sapiens PR034319; FL      | 9.9889E-06 | 0.00046461 | 5.52159465 |
| VAT1        | NM_006373.2 VAT1        | 17 Homo sapiens FLJ20230; VA     | 9.6422E-06 | 0.00045325 | 1.2392313  |
| RNY4        | NR_016185.2 RNY4        | 7 Homo sapiens Y4; HY4           | 9.2878E-06 | 0.00044129 | 1.50047222 |
| SPATA7      | NM_018418.1 SPATA7      | 14 Homo sapiens MGC102934; I     | 9.0427E-06 | 0.00043431 | 9.18452824 |
| RUNDC3B     | NM_138290.1 RUNDC3B     | 7 Homo sapiens RPIP9; RPIB9;     | 8.9566E-06 | 0.00043332 | 2.73175881 |
| ASAP3       | NM_017707.2 ASAP3       | 1 Homo sapiens CENTB6; ACA       | 8.8279E-06 | 0.00042865 | 1.39817407 |
| SGK1        | NM_005627.3 SGK1        | 6 Homo sapiens SGK               | 8.6534E-06 | 0.00042328 | 1.89739388 |
| TLE6        | NM_024760.1 TLE6        | 19 Homo sapiens FLJ14009; MG     | 8.3545E-06 | 0.00041017 | 2.30142028 |
|             | Hs.296031 HS.296031 X   | Homo sapiens cDNA clone IM       | 8.2369E-06 | 0.00040742 | 1.44489632 |
| CTSH        | NM_004390.2 CTSH        | 15 Homo sapiens CPSB; ACC-4;     | 7.9409E-06 | 0.00039573 | 1.71200256 |
| IDH2        | NM_002168.2 IDH2        | 15 Homo sapiens ICD-M; IDHM;     | 7.3689E-06 | 0.00038763 | 1.51478339 |
| MGC39900    | XM_936687.1 MGC39900    | PREDICTED: Homo sapiens h        | 7.3886E-06 | 0.00038713 | 1.72723606 |
| MTE         | NM_175621.2 MTE         | Homo sapiens MT1I                | 7.5858E-06 | 0.00038676 | 1.14926651 |
| CKB         | NM_001823.3 CKB         | 14 Homo sapiens B-CK; CKBB       | 7.4016E-06 | 0.00038628 | 1.15505225 |
| MTSS1       | NM_014751.2 MTSS1       | 8 Homo sapiens MIM; KIAA042      | 7.5983E-06 | 0.00038591 | 2.41357525 |
| HN1         | NM_016185.2 HN1         | 17 Homo sapiens HN1A; ARM2       | 7.4486E-06 | 0.0003857  | 1.20775836 |
| DDIT4L      | NM_145244.2 DDIT4L      | 4 Homo sapiens Rtp801L; RED      | 7.6223E-06 | 0.00038565 | 1.41935446 |
| C7orf41     | NM_152793.1 C7ORF41     | 7 Homo sapiens FLJ25903; El      | 7.64E-06   | 0.00038362 | 1.59713781 |
| TES         | NM_015641.2 TES         | 7 Homo sapiens DKFZP586B20       | 7.0804E-06 | 0.00037846 | 221.476387 |
| C13orf15    | NM_014059.1 C13ORF15    | 13 Homo sapiens HG-32; KIAA      | 6.3519E-06 | 0.00035084 | 1.52921143 |
| LOC10012966 | XM_00171360 LOC10012966 | 6 PREDICTED: Homo sapiens h      | 6.3591E-06 | 0.00034978 | 1.21244442 |
| WFS1        | NM_006005.2 WFS1        | 4 Homo sapiens DFNA14; DID       | 6.3902E-06 | 0.00034859 | 1.30397839 |
| C11orf67    | NM_024684.2 C11ORF67    | 11 Homo sapiens FLJ21035; MG     | 6.36E-06   | 0.00034838 | 1.46929452 |
| LOC644743   | XM_945181.1 LOC644743   | 1 PREDICTED: Homo sapiens h      | 6.2697E-06 | 0.00034774 | 1.13720405 |
| C14orf78    | XM_941311.1 C14ORF78    | PREDICTED: Homo sapiens c        | 6.0619E-06 | 0.00034049 | 1.7522156  |
| ENPP5       | NM_021572.4 ENPP5       | 6 Homo sapiens KIAA0879          | 6.0809E-06 | 0.00033869 | 9.02044176 |
| TESC        | NM_017899.1 TESC        | 12 Homo sapiens TSC; FLJ2060     | 5.9786E-06 | 0.00033724 | 1.3944236  |
| GCNT3       | NM_004751.1 GCNT3       | 15 Homo sapiens C2/4GnT; GnT     | 5.7929E-06 | 0.00033533 | 7.89108981 |
| CGN         | NM_020770.1 CGN         | 1 Homo sapiens FLJ39281; DK      | 5.6281E-06 | 0.00033012 | 1.39752024 |
| TFAP2C      | NM_003222.3 TFAP2C      | 20 Homo sapiens AP2-GAMMA;       | 5.5822E-06 | 0.00032888 | 2.3332346  |
| PDLIM1      | NM_020992.2 PDLIM1      | 10 Homo sapiens CLP36; CLP-3     | 5.507E-06  | 0.0003259  | 1.25037524 |
| FBXO2       | NM_183412.2 FBXO2       | 1 Homo sapiens Fbs1; FBG1; F     | 5.3861E-06 | 0.00032017 | 1.38590586 |
| FUCA1       | NM_000147.2 FUCA1       | 1 Homo sapiens fucosidase, al    | 5.2671E-06 | 0.00031593 | 1.28598802 |
| C12orf26    | NM_032230.1 C12ORF26    | 12 Homo sapiens FLJ22789         | 5.2018E-06 | 0.00031343 | 10.945463  |
| DPYSL2      | NM_001386.4 DPYSL2      | 8 Homo sapiens DHPRP2; DRP-      | 5.1424E-06 | 0.00031269 | 1.18323382 |
| CFD         | NM_001928.2 CFD         | 19 Homo sapiens DF; ADN; PFD     | 5.0839E-06 | 0.00031056 | 1.14235428 |
| DFNA5       | NM_004403.1 DFNA5       | 7 Homo sapiens ICERE-1           | 5.0533E-06 | 0.00031012 | 1.50474167 |
| TMEM158     | NM_015444.1 TMEM158     | 3 Homo sapiens BBP; DKFZp5       | 4.8996E-06 | 0.00030636 | 1.17030503 |
| DKK1        | NM_012242.2 DKK1        | 10 Homo sapiens DKK-1; SK        | 4.7548E-06 | 0.00029872 | 1.29110335 |
| FLJ90757    | NM_00100433 FLJ90757    | 17 PREDICTED: Homo sapiens h     | 4.7263E-06 | 0.00029834 | 3.23293099 |
| LIPA        | NM_000235.2 LIPA        | 10 Homo sapiens CESD; LAL        | 4.6766E-06 | 0.00029662 | 1.23986735 |
| DUSP6       | NM_001946.2 DUSP6       | 12 Homo sapiens MKP3; PYST1      | 4.6333E-06 | 0.00029529 | 1.20517836 |
| GCA         | NM_012198.2 GCA         | 2 Homo sapiens GCL               | 4.5197E-06 | 0.00028944 | 1.49595061 |
| MT1F        | NM_005949.1 MT1F        | 16 Homo sapiens MT1; MGC327      | 4.4913E-06 | 0.00028902 | 1.3770431  |
| ELOVL3      | NM_152310.1 ELOVL3      | 10 Homo sapiens CIG30; CIG-3     | 4.4474E-06 | 0.00028759 | 2.31249449 |
| SORT1       | NM_002959.4 SORT1       | 1 Homo sapiens NT3; Gp95         | 4.3165E-06 | 0.00028187 | 1.46911692 |
| CRLF1       | NM_004750.2 CRLF1       | 19 Homo sapiens CISS; CISS1;     | 4.2453E-06 | 0.00028138 | 2.25988613 |
| SNORD3A     | NR_006880.1 SNORD3A     | 17 Homo sapiens U3               | 4.1141E-06 | 0.00027825 | 1.54855173 |
| AHNAK2      | NM_138420.2 AHNAK2      | 14 Homo sapiens KIAA2019; C1     | 3.997E-06  | 0.00027172 | 1.73898228 |
| KLF2        | NM_016270.2 KLF2        | 19 Homo sapiens LKLF             | 3.7441E-06 | 0.0002585  | 1.15911209 |
| LOC730153   | XM_00171767 LOC730153   | 16 PREDICTED: Homo sapiens h     | 3.6459E-06 | 0.00025437 | 4.39593428 |
| FHL1        | NM_001449.3 FHL1 X      | Homo sapiens KYO-T; SLIM1;       | 3.6609E-06 | 0.00025408 | 5.52354204 |
| HPCAL4      | NM_016257.2 HPCAL4      | 1 Homo sapiens DKFZp761G12       | 3.605E-06  | 0.00025284 | 3.53464147 |
| NPTN        | NM_012428.1 NPTN        | 15 Homo sapiens SDFR1; GP55;     | 3.458E-06  | 0.00025049 | 1.20388353 |
| FZD4        | NM_012193.2 FZD4        | 11 Homo sapiens FzE4; EVR1; C    | 3.1987E-06 | 0.00024092 | 2.16725033 |
| EFNB2       | NM_004093.2 EFNB2       | 13 Homo sapiens MGC126227; I     | 3.1321E-06 | 0.00023862 | 1.26432595 |
| RRAS        | NM_006270.2 RRAS        | 19 Homo sapiens related RAS vi   | 3.135E-06  | 0.00023747 | 1.24564172 |

0.5 Upreg

|             |                         |                                |            |            |            |
|-------------|-------------------------|--------------------------------|------------|------------|------------|
| MFGE8       | NM_005928.1 MFGE8       | 15 Homo sapiens HsT19888; BA   | 2.986E-06  | 0.00023013 | 1.21582585 |
| MAP1LC3B    | NM_022818.3 MAP1LC3B    | 16 Homo sapiens MAP1A/1BLC3    | 2.9077E-06 | 0.00022541 | 1.32581742 |
| CHD5        | NM_015557.1 CHD5        | 1 Homo sapiens KIAA0444; DK    | 2.8441E-06 | 0.00022177 | 8.65708243 |
| COL1A1      | NM_000088.2 COL1A1      | 17 Homo sapiens O14            | 2.8072E-06 | 0.00022019 | 6.56135856 |
| CDH1        | NM_004360.2 CDH1        | 16 Homo sapiens CDHE; Arc-1;   | 2.6155E-06 | 0.00020761 | 1.25018084 |
| MT1X        | NM_005952.2 MT1X        | 16 Homo sapiens MT1; MT-1I     | 2.5898E-06 | 0.00020681 | 1.22705079 |
| LOC645166   | XM_00112944 LOC645166   | 1 PREDICTED: Homo sapiens s    | 2.328E-06  | 0.00019656 | 1.53692951 |
| MT1G        | NM_005950.1 MT1G        | 16 Homo sapiens MT1; MT1K; M   | 2.3442E-06 | 0.00019544 | 1.55664838 |
| STAT3       | NM_213662.1 STAT3       | 17 Homo sapiens APRF; FLJ2088  | 2.2652E-06 | 0.00019372 | 1.59837008 |
| LFNG        | NM_00104016 LFNG        | 7 Homo sapiens SCDO3           | 2.3777E-06 | 0.00019337 | 2.84135346 |
| TAGLN2      | NM_003564.1 TAGLN2      | 1 Homo sapiens KIAA0120; HA    | 2.3462E-06 | 0.00019318 | 1.35839335 |
| TP53INP1    | NM_033285.2 TP53INP1    | 8 Homo sapiens TP53INP1A; T    | 2.2734E-06 | 0.00019318 | 1.57819757 |
| HCFC1R1     | NM_00100201 HCFC1R1     | 16 Homo sapiens MGC99622; H    | 2.3594E-06 | 0.00019307 | 1.27787686 |
| TUBB4       | NM_006087.2 TUBB4       | 19 Homo sapiens TUBB5; beta-5  | 2.1207E-06 | 0.00018995 | 1.47583194 |
| HLA-DMA     | NM_006120.2 HLA-DMA     | 6 Homo sapiens HLA-DMA; RING   | 2.125E-06  | 0.00018905 | 1.73888826 |
| ASS1        | NM_000050.3 ASS1        | 9 Homo sapiens CTLDN1; ASS     | 2.1313E-06 | 0.00018835 | 3.19222075 |
| JUP         | NM_021991.1 JUP         | 17 Homo sapiens PKGB; CTNNG    | 1.99E-06   | 0.00018319 | 1.31182959 |
| GLCE        | NM_015554.1 GLCE        | 15 Homo sapiens KIAA0836; HS   | 1.9997E-06 | 0.00018282 | 1.42005289 |
| GPR177      | NM_024911.4 GPR177      | 1 Homo sapiens FLJ23091; C1    | 2.0018E-06 | 0.00018176 | 1.43403553 |
| SEMA6A      | NM_020796.2 SEMA6A      | 5 Homo sapiens VIA; SEMAQ; S   | 1.8812E-06 | 0.00017686 | 3.65814145 |
| LGALS1      | NM_002305.2 LGALS1      | 22 Homo sapiens DKFZp686E23    | 1.8324E-06 | 0.0001735  | 1.15558972 |
| NUDT7       | NM_00110566 NUDT7       | 16 Homo sapiens nudix (nucleos | 1.7178E-06 | 0.00016743 | 1.59222819 |
| FLJ40504    | NM_173624.1 FLJ40504    | 17 Homo sapiens MGC138233; I   | 1.7247E-06 | 0.00016688 | 1.14913918 |
| SREBF1      | NM_004176.3 SREBF1      | 17 Homo sapiens SREBP1         | 1.5998E-06 | 0.00016439 | 1.36672147 |
| SNORA12     | NR_002954.1 SNORA12     | 10 Homo sapiens U108           | 1.6037E-06 | 0.00016353 | 1.200512   |
| SCARNA8     | NR_003009.1 SCARNA8     | 9 Homo sapiens U92             | 1.6156E-06 | 0.00016348 | 1.42659091 |
| BEGAIN      | NM_020836.2 BEGAIN      | 14 Homo sapiens KIAA1446; BE   | 1.6365E-06 | 0.00016311 | 3.69813886 |
| PQLC3       | NM_152391.2 PQLC3       | 2 Homo sapiens C2orf22; MGC    | 1.5196E-06 | 0.00015737 | 1.36468336 |
| SNORD13     | Hs.583806 SNORD13       | 8 Homo sapiens U13             | 1.4937E-06 | 0.00015715 | 1.76339952 |
| CHURC1      | NM_145165.2 CHURC1      | 14 Homo sapiens FLJ33064; chc  | 1.4523E-06 | 0.00015652 | 2.28246924 |
| LAMP3       | NM_014398.2 LAMP3       | 3 Homo sapiens TSC403; DC-L    | 1.4568E-06 | 0.00015573 | 23.3733885 |
| MAN1A1      | NM_005907.2 MAN1A1      | 6 Homo sapiens MAN9; HUMM1     | 1.4097E-06 | 0.00015318 | 3.15018072 |
| YPEL5       | NM_016061.1 YPEL5       | 2 Homo sapiens CGI-127         | 1.3956E-06 | 0.00015289 | 1.53569594 |
| HES2        | NM_019089.3 HES2        | 1 Homo sapiens hairy and enh   | 1.1902E-06 | 0.00013371 | 3.81183735 |
| DNER        | NM_139072.2 DNER        | 2 Homo sapiens bet; UNQ26      | 1.1236E-06 | 0.0001273  | 4.75397153 |
|             | 39327 NM_019106.4 39327 | 22 Homo sapiens SEP3; MGC13    | 1.0862E-06 | 0.00012631 | 1.5835937  |
| CTSL2       | NM_001333.2 CTSL2       | 9 Homo sapiens CTSV; CATL2;    | 1.0741E-06 | 0.00012601 | 1.27046828 |
| IGSF3       | NM_001542.2 IGSF3       | 1 Homo sapiens V8; EWI-3; M    | 1.0919E-06 | 0.00012587 | 1.40194113 |
| OGDHL       | NM_018245.1 OGDHL       | 10 Homo sapiens oxoglutarate d | 1.006E-06  | 0.00012124 | 2.70952873 |
| ISG15       | NM_005101.1 ISG15       | 1 Homo sapiens G1P2; UCRP; I   | 9.2997E-07 | 0.0001131  | 1.24906853 |
| CKMT1A      | NM_00101500 CKMT1A      | 15 Homo sapiens UMTCK; CKMT    | 9.1866E-07 | 0.00011276 | 1.72848195 |
| C20orf108   | NM_080821.1 C20ORF108   | 20 Homo sapiens DKFZP434A11    | 8.7371E-07 | 0.00010824 | 1.76998524 |
| NEU1        | NM_000434.2 NEU1        | 6 Homo sapiens NEU; SIAL1      | 7.9931E-07 | 9.9959E-05 | 1.75362596 |
| PLA2G10     | NM_003561.1 PLA2G10     | 16 Homo sapiens GXPLA2; SPLA   | 7.5841E-07 | 9.6668E-05 | 4.7002757  |
| SCARNA11    | NR_003012.1 SCARNA11    | 12 Homo sapiens ACA57          | 7.6392E-07 | 9.6443E-05 | 2.05457857 |
| RAB31       | NM_006868.2 RAB31       | 18 Homo sapiens Rab22B         | 6.9652E-07 | 9.052E-05  | 1.33069288 |
| LOC648526   | XM_937579.1 LOC648526   | PREDICTED: Homo sapiens s      | 6.2139E-07 | 8.4919E-05 | 1.99996925 |
| LOC10013413 | XM_00172085 LOC10013413 | PREDICTED: Homo sapiens s      | 5.795E-07  | 8.0862E-05 | 1.25074269 |
| SCPEP1      | NM_021626.1 SCPEP1      | 17 Homo sapiens RISC; HSCP1    | 5.5359E-07 | 7.8907E-05 | 1.34367023 |
| NKD2        | NM_033120.2 NKD2        | 5 Homo sapiens Naked2          | 5.1353E-07 | 7.7357E-05 | 1.36049127 |
| TMEM205     | NM_198536.1 TMEM205     | 19 Homo sapiens UNQ501; MGC    | 5.2169E-07 | 7.684E-05  | 1.30736331 |
| SGK         | NM_005627.2 SGK         | 6 Homo sapiens SGK1            | 5.0235E-07 | 7.6541E-05 | 2.0834313  |
| CRIP2       | NM_001312.2 CRIP2       | 14 Homo sapiens CRP2; CRIP; E  | 4.4589E-07 | 7.0366E-05 | 1.87948424 |
| MYLIP       | NM_013262.3 MYLIP       | 6 Homo sapiens MIR             | 4.3885E-07 | 7.009E-05  | 1.53008816 |
| FOXC1       | NM_001453.1 FOXC1       | 6 Homo sapiens FREAC3; FKHL    | 4.2541E-07 | 6.9621E-05 | 1.20312359 |
| CRABP2      | NM_001878.2 CRABP2      | 1 Homo sapiens CRABP-II; RBF   | 4.2788E-07 | 6.917E-05  | 1.24287858 |
| VGF         | NM_003378.2 VGF         | 7 Homo sapiens VGF nerve gro   | 4.0159E-07 | 6.9137E-05 | 1.56564867 |
| LOC149501   | XR_017100.2 LOC149501   | 1 PREDICTED: Homo sapiens n    | 3.9257E-07 | 6.8473E-05 | 1.21977235 |
| CKMT1B      | NM_020990.3 CKMT1B      | 15 Homo sapiens UMTCK; CKMT    | 3.4198E-07 | 6.3849E-05 | 3.50244426 |
| GLDC        | NM_000170.1 GLDC        | 9 Homo sapiens MGC138198; C    | 3.4479E-07 | 6.348E-05  | 2.85265959 |
| NRGN        | NM_006176.1 NRGN        | 11 Homo sapiens RC3; hng       | 2.8679E-07 | 5.9402E-05 | 1.90452433 |
| ITM2C       | NM_00101251 ITM2C       | 2 Homo sapiens E25; ITM3; BF   | 2.5149E-07 | 5.3769E-05 | 1.22139319 |
| HLA-B       | NM_005514.5 HLA-B       | 6 Homo sapiens AS; HLA-B-55    | 2.2094E-07 | 4.8813E-05 | 1.39868688 |
| JUN         | NM_002228.3 JUN         | 1 Homo sapiens AP1; c-Jun      | 2.0971E-07 | 4.7118E-05 | 1.76409546 |
| PRPH        | NM_006262.3 PRPH        | 12 Homo sapiens PRPH1; NEF4    | 1.6494E-07 | 4.049E-05  | 2.39976554 |
| SAT1        | NM_002970.1 SAT1        | Homo sapiens KFS; SSAT-1       | 1.5629E-07 | 3.9091E-05 | 1.27265243 |
| LOC649970   | XM_939056.1 LOC649970   | PREDICTED: Homo sapiens s      | 1.369E-07  | 3.5583E-05 | 1.72511965 |
| HLA-DRA     | NM_019111.3 HLA-DRA     | 6 Homo sapiens HLA-DRA1        | 1.3138E-07 | 3.5542E-05 | 3.05174757 |
| LOC652097   | XM_941428.1 LOC652097   | PREDICTED: Homo sapiens h      | 1.2313E-07 | 3.4004E-05 | 2.2375519  |
| BAMBI       | NM_012342.2 BAMBI       | 10 Homo sapiens NMA            | 1.0787E-07 | 3.0424E-05 | 1.45239122 |

0.5 Upreg

|           |             |           |    |              |                           |            |            |            |
|-----------|-------------|-----------|----|--------------|---------------------------|------------|------------|------------|
| SLC2A3    | NM_006931.1 | SLC2A3    | 12 | Homo sapiens | GLUT3; FLJ90              | 9.974E-08  | 2.9381E-05 | 3.2854082  |
| PARM1     | NM_015393.2 | PARM1     | 4  | Homo sapiens | prostate andrc            | 9.4335E-08 | 2.842E-05  | 1.78982031 |
| TIMP2     | XM_941104.1 | TIMP2     |    |              | PREDICTED: Homo sapiens T | 7.7686E-08 | 2.5117E-05 | 1.38692649 |
| CTGF      | NM_001901.2 | CTGF      | 6  | Homo sapiens | CCN2; MGC10               | 6.8104E-08 | 2.5077E-05 | 2.24031906 |
| HABP4     | NM_014282.1 | HABP4     | 9  | Homo sapiens | SERBP1L; IHA              | 6.8221E-08 | 2.4442E-05 | 1.66879268 |
| HLA-DMB   | NM_002118.3 | HLA-DMB   | 6  | Homo sapiens | D6S221E; RIN              | 5.6019E-08 | 2.1841E-05 | 3.63171055 |
| ARID5B    | NM_032199.1 | ARID5B    | 10 | Homo sapiens | MRF2; FLJ211              | 4.7211E-08 | 1.9557E-05 | 2.08649165 |
| TMSB15A   | NM_021992.2 | TMSB15A   |    |              | Homo sapiens Tb15; TMSNB; | 4.4195E-08 | 1.8898E-05 | 1.36332395 |
| FAM71E1   | NM_138411.1 | FAM71E1   | 19 | Homo sapiens | FLJ27522; FLJ             | 4.2357E-08 | 1.8716E-05 | 1.84109231 |
| CRISPLD2  | NM_031476.1 | CRISPLD2  | 16 | Homo sapiens | DKFZP434B04               | 3.7686E-08 | 1.7842E-05 | 6.09368793 |
| CD24      | NM_013230.2 | CD24      |    |              | Homo sapiens CD24A        | 2.319E-08  | 1.2296E-05 | 2.51891308 |
| TSPAN13   | NM_014399.3 | TSPAN13   | 7  | Homo sapiens | FLJ22934; NE              | 1.7935E-08 | 1.0806E-05 | 1.64928507 |
| HIST1H2BD | NM_138720.1 | HIST1H2BD | 6  | Homo sapiens | H2B.1B; HIRIF             | 1.4233E-08 | 8.9845E-06 | 2.98126712 |
| SUSD2     | NM_019601.3 | SUSD2     | 22 | Homo sapiens | BK65A6.2; FL              | 5.8614E-09 | 4.3166E-06 | 3.73063356 |
| IFI6      | NM_002038.2 | IFI6      | 1  | Homo sapiens | IFI-6-16; 6-16            | 2.487E-09  | 2.9971E-06 | 1.82811724 |
| PLEKHB1   | NM_021200.1 | PLEKHB1   | 11 | Homo sapiens | PHR1; PHRET1              | 1.5636E-09 | 2.303E-06  | 3.75312168 |
| FLJ35767  | NM_207459.1 | FLJ35767  | 17 | Homo sapiens | FLJ35767 prot             | 6.5898E-11 | 1.7471E-07 | 3.55885075 |

2.0 Upreg

| SYMBOL      | SEARCH_KEY  | ILMN_GENE    | CHROMOSOME | DEFINITION                 | SYNONYMS          | pval       | fdr        | fold       |
|-------------|-------------|--------------|------------|----------------------------|-------------------|------------|------------|------------|
| ATP2B1      | NM_00100132 | ATP2B1       | 12         | Homo sapiens               | PMCA1; PMCA       | 0.02887829 | 0.0458241  | 380.706788 |
| LEAP2       | NM_052971.2 | LEAP2        | 5          | Homo sapiens               | LEAP-2            | 0.00117781 | 0.00375049 | 187.711056 |
| DKFZp686O24 | NM_00100991 | DKFZP686O24  | 11         | Homo sapiens               | DKFZp686I21       | 0.0196246  | 0.03393479 | 78.3045689 |
| GRHL2       | NM_024915.1 | GRHL2        | 8          | Homo sapiens               | DFNA28; BOM       | 0.00153514 | 0.00462285 | 67.8852216 |
| FRRS1       | NM_00101366 | FRRS1        | 1          | Homo sapiens               | SDR2; SDFR2       | 0.03141708 | 0.04873549 | 64.751661  |
| LOC652669   | XM_942246.1 | LOC652669    |            | PREDICTED: Homo sapiens    | s                 | 0.00065473 | 0.00238059 | 57.9808291 |
| ICOSLG      | NM_015259.4 | ICOSLG       | 21         | Homo sapiens               | ICOSL; B7RP1      | 0.00277927 | 0.00730652 | 53.0487356 |
|             | Hs.545780   | HS.545780    | 9          | zu71d08.s1                 | Soares_testis_NI  | 0.00058    | 0.00217584 | 52.0407995 |
|             | Hs.564221   | HS.564221    | 11         | UI-H-BW1-anf-b-07-0-UI.s1  |                   | 0.01517541 | 0.02778877 | 37.5005751 |
| MGC42630    | NM_175923.3 | MGC42630     | 9          | Homo sapiens               | hypothetical p    | 0.01422533 | 0.02647276 | 30.9781022 |
| SNORD100    | NR_002435.1 | SNORD100     | 6          | Homo sapiens               | HBII-429          | 0.00186338 | 0.00534755 | 29.2518022 |
| WNT10B      | NM_003394.2 | WNT10B       | 12         | Homo sapiens               | WNT-12            | 0.00861599 | 0.01782234 | 27.8760066 |
| DNAJC1      | NM_022365.2 | DNAJC1       | 10         | Homo sapiens               | MGC131954; I      | 0.01248663 | 0.0239085  | 25.4989305 |
| RCC1        | NM_001269.3 | RCC1         | 1          | Homo sapiens               | RCC1-I; CHC1      | 1.03E-05   | 0.0001138  | 25.2348628 |
| UTS2        | NM_006786.2 | UTS2         | 1          | Homo sapiens               | UCN2; PRO10       | 0.00011682 | 0.00064479 | 23.0484031 |
| C9orf82     | NM_024828.2 | C9ORF82      | 9          | Homo sapiens               | RP11-337A23.      | 0.00116129 | 0.00371531 | 22.8121823 |
| GPATCH8     | NM_00100290 | GPATCH8      | 17         | Homo sapiens               | GPATC8; KIAA      | 0.02666606 | 0.04310034 | 21.6782716 |
| ZNF30       | NM_194325.1 | ZNF30        | 19         | Homo sapiens               | KOX28; FLJ20      | 0.02341976 | 0.03902575 | 21.4668797 |
| CARD8       | NM_014959.1 | CARD8        | 19         | Homo sapiens               | NDPP1; CARD       | 0.00344409 | 0.00862252 | 21.4527089 |
| SLC9A6      | NM_006359.1 | SLC9A6       |            | Homo sapiens               | KIAA0267; NH      | 0.00628012 | 0.01385273 | 21.3912333 |
| ALDH3B1     | NM_00103001 | ALDH3B1      | 11         | Homo sapiens               | FLJ26433; ALI     | 0.00025517 | 0.00114403 | 20.9002126 |
| RSF1        | NM_016578.3 | RSF1         | 11         | Homo sapiens               | HBXAP; p325;      | 0.01226794 | 0.02356868 | 20.8213883 |
| TFAP2E      | NM_178548.2 | TFAP2E       | 1          | Homo sapiens               | MGC49007; AI      | 0.01199014 | 0.02317426 | 19.0196104 |
| MIR1253     | NR_031654.1 | MIR1253      |            | Homo sapiens               | microRNA 125      | 0.02960213 | 0.04664579 | 18.5397991 |
| SNORD4B     | NR_000009.1 | SNORD4B      | 17         | Homo sapiens               | RNU101B; Z1       | 0.01398999 | 0.02609736 | 17.5770448 |
| SIM2        | NM_005069.2 | SIM2         | 21         | Homo sapiens               | MGC119447; S      | 0.00553049 | 0.01249852 | 17.4406967 |
| SLC6A16     | NM_014037.2 | SLC6A16      | 19         | Homo sapiens               | NTT5              | 0.01535235 | 0.02807493 | 17.2712149 |
| TMX4        | NM_021156.2 | TMX4         | 20         | Homo sapiens               | DJ971N18.2; I     | 8.39E-07   | 2.05E-05   | 16.6638646 |
| HM13        | NM_030789.2 | HM13         | 20         | Homo sapiens               | MSTP086; H1       | 0.00097661 | 0.00322705 | 16.270388  |
| RLTPR       | NM_00101383 | RLTPR        | 16         | Homo sapiens               | LRRC16C           | 0.00404625 | 0.00976563 | 15.4909779 |
| LOC644760   | XM_932354.1 | LOC644760    |            | PREDICTED: Homo sapiens    | h                 | 0.00638456 | 0.01403183 | 15.0797845 |
| UNC5C       | NM_003728.2 | UNC5C        | 5          | Homo sapiens               | UNC5H3            | 0.01705758 | 0.03042536 | 13.4402125 |
|             | Hs.581028   | HS.581028    | 22         | DA778026                   | OCBBF2 Homo sa    | 0.02342898 | 0.03903514 | 12.4029752 |
| CD109       | NM_133493.1 | CD109        | 6          | Homo sapiens               | FLJ38569; DK      | 0.0017987  | 0.0052087  | 11.9766099 |
| ZNF564      | NM_144976.2 | ZNF564       | 19         | Homo sapiens               | MGC26914          | 0.00022144 | 0.00103779 | 11.9358417 |
| NACC2       | NM_144653.3 | NACC2        | 9          | Homo sapiens               | BTBD14; MGC       | 0.0288433  | 0.04578194 | 11.2401684 |
|             | Hs.224678   | HS.224678    | 10         | RST34529                   | Athersys RAGE Lit | 0.00231567 | 0.00631693 | 10.8074064 |
| C1QA        | NM_015991.1 | C1QA         | 1          | Homo sapiens               | complement c      | 0.00070022 | 0.00250248 | 10.5515976 |
| LOC643233   | XM_926592.1 | LOC643233    |            | PREDICTED: Homo sapiens    | s                 | 3.09E-05   | 0.00025463 | 10.4309233 |
| ARL17P1     | NM_016632.1 | ARL17P1      | 17         | Homo sapiens               | ARF1P2; ARL1      | 0.01513039 | 0.02773905 | 10.3694002 |
| LOC641825   | XM_935575.1 | LOC641825    |            | PREDICTED: Homo sapiens    | h                 | 0.00140871 | 0.00432116 | 10.3245217 |
| GPD2        | NM_000408.2 | GPD2         | 2          | Homo sapiens               | mGPDH; GDH        | 0.015745   | 0.02861004 | 10.2796805 |
| ZNF57       | NM_173480.1 | ZNF57        | 19         | Homo sapiens               | ZNF424            | 0.00739007 | 0.01577593 | 10.1249058 |
| SNCG        | NM_003087.1 | SNCG         | 10         | Homo sapiens               | BCSG1; SR         | 0.00071438 | 0.00254305 | 9.56569688 |
| CASP7       | NM_033338.4 | CASP7        | 10         | Homo sapiens               | ICE-LAP3; CM      | 0.02840052 | 0.04525097 | 9.49835655 |
| FAM20C      | NM_020223.1 | FAM20C       | 7          | Homo sapiens               | RNS; DMP4         | 6.82E-05   | 0.00044372 | 9.44844337 |
| LOC645249   | XM_928291.3 | LOC645249    |            | PREDICTED: Homo sapiens    | h                 | 0.00887116 | 0.01824597 | 9.38560844 |
| FGFR1OP     | NM_007045.2 | FGFR1OP      | 6          | Homo sapiens               | FOP               | 0.00271663 | 0.00717133 | 9.3756674  |
| LOC440366   | XR_042154.1 | LOC440366    |            | PREDICTED: Homo sapiens    | n                 | 0.01323821 | 0.02497792 | 9.26414598 |
| LOC10013251 | XM_00172519 | LOC100132510 |            | PREDICTED: Homo sapiens    | s                 | 0.00556596 | 0.01256823 | 9.22075001 |
| LOC644150   | XM_933686.1 | LOC644150    |            | PREDICTED: Homo sapiens    | s                 | 9.28E-07   | 2.19E-05   | 9.15757682 |
| BEND3       | NM_00108045 | BEND3        | 6          | Homo sapiens               | RP11-59I9.2       | 0.00082429 | 0.002826   | 8.94706886 |
| FAM164A     | NM_016010.1 | FAM164A      | 8          | Homo sapiens               | CGI-62            | 0.02132132 | 0.03628564 | 8.47003773 |
| HMGA2       | NM_00101588 | HMGA2        | 12         | Homo sapiens               | HMGI-C; HMG       | 0.00619522 | 0.01371834 | 8.35697149 |
| MGC35361    | XM_935566.1 | MGC35361     |            | Homo sapiens               | hypothetical p    | 0.00453894 | 0.01072373 | 8.23774069 |
| LOC10013038 | XM_00171847 | LOC100130387 |            | PREDICTED: Homo sapiens    | s                 | 0.00787728 | 0.01657828 | 8.16807492 |
|             | Hs.580154   | HS.580154    | 2          | UI-1-BB1p-aki-a-08-0-UI.s1 |                   | 0.03017628 | 0.04729677 | 8.16291947 |
| BLID        | NM_00100178 | BLID         | 11         | Homo sapiens               | BRCC2; MGC1       | 0.01927742 | 0.03348362 | 8.15209978 |
| LOC653717   | XM_496034.2 | LOC653717    |            | PREDICTED: Homo sapiens    | s                 | 0.01797967 | 0.03170069 | 8.03007459 |
| TMEM129     | NM_138385.2 | TMEM129      | 4          | Homo sapiens               | D4S2561E; FL      | 0.02713069 | 0.04367595 | 7.98473895 |
| MIR185      | NR_029706.1 | MIR185       |            | Homo sapiens               | microRNA 185      | 0.01072705 | 0.0212198  | 7.80694079 |
|             | Hs.569182   | HS.569182    | 12         | MGC9.6.1.1.F08.F.1         | NIH_M             | 0.02334264 | 0.03892709 | 7.52383277 |
| NTN5        | NM_145807.1 | NTN5         | 19         | Homo sapiens               | netrin 5 (NTN     | 0.00998795 | 0.02008308 | 7.47654738 |
| HSH2D       | NM_032855.2 | HSH2D        | 19         | Homo sapiens               | HSH2; ALX; FI     | 0.0001054  | 0.00060034 | 7.25420714 |
| CAMK2D      | NM_172115.1 | CAMK2D       | 4          | Homo sapiens               | MGC44911; C       | 1.13E-06   | 2.49E-05   | 6.9283904  |
| LOC10012934 | XM_00171873 | LOC10012934  |            | PREDICTED: Homo sapiens    | h                 | 0.01999061 | 0.03443619 | 6.62244765 |
| LOC10013047 | XM_00172348 | LOC100130476 |            | PREDICTED: Homo sapiens    | s                 | 0.02427123 | 0.04017359 | 6.61556432 |
| FBS1        | NM_022452.1 | FBS1         | 16         | Homo sapiens               | FLJ11618; FB      | 0.02373185 | 0.03944903 | 6.60934227 |
| FAM125B     | NM_00101170 | FAM125B      | 9          | Homo sapiens               | FLJ00001; C9      | 0.01399579 | 0.02609922 | 6.59093433 |

## 2.0 Upreg

|             |             |             |    |                           |                           |            |            |            |
|-------------|-------------|-------------|----|---------------------------|---------------------------|------------|------------|------------|
| C17orf106   | NM_00111332 | C17ORF106   | 17 | Homo sapiens              | MGC54300; FI              | 0.00248018 | 0.00667028 | 6.57325998 |
| BFSP1       | NM_001195.2 | BFSP1       | 20 | Homo sapiens              | FILENSIN; CP              | 0.0012178  | 0.0038407  | 6.55305598 |
| LOC652051   | XM_945171.1 | LOC652051   |    |                           | PREDICTED: Homo sapiens h | 0.01276002 | 0.02430778 | 6.41029174 |
| FCHSD2      | NM_014824.1 | FCHSD2      | 11 | Homo sapiens              | NWK; KIAA070              | 0.02779384 | 0.04453899 | 6.38008336 |
| GPR101      | NM_054021.1 | GPR101      |    |                           | Homo sapiens GPCR6        | 0.01636405 | 0.02951776 | 6.34123014 |
|             | Hs.149232   | HS.149232   |    |                           |                           |            |            |            |
| RNF217      | NM_152553.2 | RNF217      | 11 | wf30f02.x1                | Soares_NFL_T_G            | 0.03144723 | 0.0487753  | 6.33988433 |
| LIFR        | NM_002310.3 | LIFR        | 6  | Homo sapiens              | C6orf172; MG              | 0.00017809 | 0.00088136 | 6.14397224 |
| FLJ10996    | NM_019044.2 | FLJ10996    | 5  | Homo sapiens              | CD118; STWS               | 0.00064435 | 0.0023523  | 6.13891951 |
| TACR2       | NM_001057.1 | TACR2       | 2  | Homo sapiens              | MGC13033                  | 0.02630501 | 0.04272009 | 6.02456004 |
| DYNC2H1     | NM_00108046 | DYNC2H1     | 10 | Homo sapiens              | SKR; NKNAR;               | 0.01560128 | 0.02842016 | 6.00826965 |
| SNORA68     | NR_000012.1 | SNORA68     | 11 | Homo sapiens              | DYH1B; FLJ11              | 0.00266791 | 0.00706674 | 5.99230755 |
| KIAA1881    | Hs.567652   | KIAA1881    | 19 | Homo sapiens              | NNU68; U68                | 0.00689724 | 0.01495595 | 5.80718594 |
| MRM1        | NM_024864.3 | MRM1        |    |                           | PREDICTED: Homo sapiens k | 0.00274169 | 0.00722344 | 5.78865023 |
| CPNE7       | NM_153636.1 | CPNE7       | 17 | Homo sapiens              | FLJ22578                  | 0.01011618 | 0.02027341 | 5.64251691 |
| ZNF525      | XM_375646.3 | ZNF525      | 16 | Homo sapiens              | MGC34192                  | 7.66E-05   | 0.00048028 | 5.60797547 |
| HOXA2       | NM_006735.3 | HOXA2       | 19 | PREDICTED: Homo sapiens z |                           | 0.02521857 | 0.04134492 | 5.43983109 |
| FRYL        | XM_945291.1 | FRYL        | 7  | Homo sapiens              | HOX1K                     | 0.00062297 | 0.00229349 | 5.35919761 |
| SLIT2       | NM_004787.1 | SLIT2       | 4  | Homo sapiens              | FLJ16177; KIA             | 4.34E-05   | 0.00032559 | 5.31536336 |
| ZSCAN29     | NM_152455.2 | ZSCAN29     | 4  | Homo sapiens              | Slit-2; SLIL3;            | 0.00304422 | 0.00782326 | 5.28115604 |
|             | Hs.575095   | HS.575095   |    |                           |                           |            |            |            |
| FAM114A1    | NM_138389.1 | FAM114A1    | 15 | Homo sapiens              | MGC129895; I              | 0.00405424 | 0.00977623 | 5.16256804 |
| ALG10       | NM_032834.3 | ALG10       | 14 | Homo sapiens              | cDNA: FLJ214              | 0.02644085 | 0.04283828 | 5.09289934 |
| LOC728945   | XM_00172348 | LOC728945   | 4  | Homo sapiens              | Noxp20                    | 0.00202761 | 0.00570438 | 5.06515046 |
| PLCH1       | NM_014996.1 | PLCH1       | 12 | Homo sapiens              | FLJ14751; KCI             | 0.00384852 | 0.00941384 | 5.01670879 |
|             | Hs.190092   | HS.190092   |    |                           | PREDICTED: Homo sapiens s | 0.00679033 | 0.01478311 | 4.97607784 |
| LOC652183   | XM_941544.1 | LOC652183   | 3  | Homo sapiens              | DKFZp434C13               | 0.00971018 | 0.01962624 | 4.94788138 |
| SNORD60     | NR_002736.1 | SNORD60     | 1  | BX116001                  | Soares_testis_NH          | 0.02289217 | 0.03833468 | 4.91319941 |
| B3GNT5      | NM_032047.3 | B3GNT5      |    |                           | PREDICTED: Homo sapiens h | 0.00900886 | 0.01847326 | 4.86749556 |
|             | Hs.565633   | HS.565633   |    |                           |                           |            |            |            |
| KIAA1333    | NM_017769.2 | KIAA1333    | 16 | Homo sapiens              | RNU60; U60                | 0.00594765 | 0.0132729  | 4.86007356 |
| LOC653080   | XM_930884.1 | LOC653080   | 3  | Homo sapiens              | beta3Gn-T5; E             | 0.01998479 | 0.03444254 | 4.85219617 |
| MPZ         | NM_000530.3 | MPZ         |    |                           | UI-H-FH1-bfe-o-03-0-UI.s1 | 0.03221156 | 0.04976194 | 4.83877112 |
| LOC646123   | XM_933424.1 | LOC646123   | 14 | Homo sapiens              | G2E3; FLJ203              | 0.02242795 | 0.03772005 | 4.83833957 |
| OR2T6       | NM_00100547 | OR2T6       | 8  | PREDICTED: Homo sapiens s |                           | 0.00065526 | 0.00238093 | 4.81839893 |
|             | Hs.558271   | HS.558271   |    |                           |                           |            |            |            |
| SMCHD1      | XM_938891.1 | SMCHD1      | 1  | Homo sapiens              | CMT1B; CMT1               | 0.00208629 | 0.00582127 | 4.8179437  |
| ACOT8       | NM_183386.1 | ACOT8       | 22 | PREDICTED: Homo sapiens h |                           | 0.00010045 | 0.0005804  | 4.80119765 |
| LOC649639   | XM_943818.1 | LOC649639   | 1  | Homo sapiens              | OR2T9; OST7(              | 0.00082302 | 0.00282431 | 4.67931941 |
| KIAA0460    | NM_015203.2 | KIAA0460    | 6  | H.sapiens                 | mRNA for CD58 T           | 0.00945549 | 0.01921508 | 4.58612886 |
| LOC652185   | XM_941547.1 | LOC652185   | 18 | Homo sapiens              | KIAA0650; DK              | 0.02755151 | 0.04420934 | 4.55624556 |
| LOC387826   | XM_373521.3 | LOC387826   | 20 | Homo sapiens              | PTE1; hTE; HM             | 0.01590126 | 0.02883131 | 4.53330609 |
| ARFGEF2     | NM_006420.1 | ARFGEF2     |    |                           | PREDICTED: Homo sapiens h | 0.01485553 | 0.02735047 | 4.53109046 |
| LOC644144   | XM_927354.1 | LOC644144   | 1  | Homo sapiens              | FLJ32145; HS              | 0.00012651 | 0.00068235 | 4.52022706 |
|             | Hs.573047   | HS.573047   |    |                           | PREDICTED: Homo sapiens s | 0.00528329 | 0.01026727 | 4.43917533 |
|             | Hs.141748   | HS.141748   |    |                           |                           |            |            |            |
| MYADML      | NM_207329.1 | MYADML      | 12 | PREDICTED: Homo sapiens h |                           | 0.00494124 | 0.01147221 | 4.39670073 |
| DKFZp761E19 | NM_138368.2 | DKFZp761E19 | 20 | Homo sapiens              | FLJ23723; dJ1             | 0.00023393 | 0.00109365 | 4.37154166 |
| LOC642655   | XM_926114.1 | LOC642655   | 17 | PREDICTED: Homo sapiens s |                           | 0.01218678 | 0.02344591 | 4.35719715 |
| LOC152024   | XM_944430.1 | LOC152024   | 4  | BX110921                  | Soares_fetal_liver        | 0.01399029 | 0.02609345 | 4.35139589 |
|             | Hs.49181    | HS.49181    |    |                           |                           |            |            |            |
| LOC643534   | XM_936822.2 | LOC643534   | 10 | BX105574                  | Soares_fetal_liver        | 0.00540737 | 0.0122713  | 4.33068114 |
| LOC643772   | XM_927061.1 | LOC643772   | 2  | Homo sapiens              | myeloid-assoc             | 0.02744431 | 0.04407636 | 4.32921387 |
| DGKG        | NM_001346.1 | DGKG        | 11 | Homo sapiens              | PP1030                    | 0.01801155 | 0.0317363  | 4.32571221 |
| NMNAT3      | NM_178177.2 | NMNAT3      | 3  | PREDICTED: Homo sapiens s |                           | 0.02693398 | 0.04343649 | 4.30634561 |
| ERLIN2      | NM_00100379 | ERLIN2      |    |                           | PREDICTED: Homo sapiens n | 0.0241181  | 0.03997492 | 4.28338597 |
| LEFTY2      | NM_003240.2 | LEFTY2      | 7  | tn48d04.x1                | NCI_CGAP_Kid11            | 0.02923787 | 0.04622594 | 4.25016173 |
| TRAF3       | NM_003300.2 | TRAF3       |    |                           | PREDICTED: Homo sapiens s | 0.00513835 | 0.01181625 | 4.22449423 |
| PAR6B       | NM_032521.1 | PAR6B       | 9  | PREDICTED: Homo sapiens s |                           | 0.00264213 | 0.00701898 | 4.17069865 |
|             | Hs.538300   | HS.538300   |    |                           |                           |            |            |            |
| CDK8        | NM_001260.1 | CDK8        | 3  | Homo sapiens              | DGK-GAMMA;                | 0.00529657 | 0.01208294 | 4.16418059 |
| LOC729985   | XM_929793.1 | LOC729985   | 3  | Homo sapiens              | PNAT-3; PNAT              | 0.009616   | 0.01947571 | 4.15587899 |
| LOC647805   | XM_943032.1 | LOC647805   | 8  | Homo sapiens              | C8orf2; MGC8              | 0.02011644 | 0.03460907 | 4.14120134 |
|             | Hs.543981   | HS.543981   |    |                           |                           |            |            |            |
| GLYCTK      | NM_145262.2 | GLYCTK      | 1  | Homo sapiens              | LEFTA; TGFB4              | 0.02170751 | 0.03675867 | 4.13734206 |
|             | Hs.131087   | HS.131087   |    |                           |                           |            |            |            |
| PLA2G15     | NM_012320.3 | PLA2G15     | 14 | Homo sapiens              | CD40bp; CAP               | 7.82E-05   | 0.00048842 | 4.09916719 |
|             | Hs.254752   | HS.254752   |    |                           |                           |            |            |            |
| LOC642367   | XR_038808.1 | LOC642367   | 20 | Homo sapiens              | PAR6B                     | 0.00436932 | 0.01038166 | 4.09446045 |
| LOC10013359 | XM_00172169 | LOC10013359 | 10 | hi90e01.x1                | Soares_NFL_T_G            | 0.00203957 | 0.00573063 | 4.08880083 |
|             |             |             |    |                           |                           |            |            |            |
|             |             |             | 13 | Homo sapiens              | K35; MGC126               | 0.01774697 | 0.03135144 | 4.08799595 |
|             |             |             | 2  | PREDICTED: Homo sapiens s |                           | 0.01741244 | 0.03089606 | 4.07605543 |
|             |             |             |    |                           | PREDICTED: Homo sapiens h | 0.01684457 | 0.03015927 | 4.03639693 |
|             |             |             | 5  | nk37c05.s1                | NCI_CGAP_GC2              | 0.00725466 | 0.01553263 | 4.01667    |
|             |             |             | 3  | Homo sapiens              | HBeAgBP4A; t              | 0.01565669 | 0.02850677 | 3.9877064  |
|             |             |             | 3  | BX111162                  | Soares_testis_NH          | 0.01634831 | 0.02949917 | 3.96577053 |
|             |             |             | 16 | Homo sapiens              | DKFZp564A01               | 0.00038579 | 0.0015798  | 3.9435196  |
|             |             |             | 3  | xv32c11.x1                | Soares_NFL_T_C            | 0.00118819 | 0.00377028 | 3.93982273 |
|             |             |             |    |                           | PREDICTED: Homo sapiens n | 0.02898728 | 0.04596349 | 3.93922817 |
|             |             |             |    |                           | PREDICTED: Homo sapiens h | 0.01480368 | 0.02727813 | 3.90883715 |

## 2.0 Upreg

|             |             |             |    |                           |                      |            |            |            |
|-------------|-------------|-------------|----|---------------------------|----------------------|------------|------------|------------|
| NFRKB       | NM_006165.2 | NFRKB       | 11 | Homo sapiens              | DKFZp547B20          | 0.01646381 | 0.0296485  | 3.90638421 |
| MSI2        | NM_170721.1 | MSI2        | 17 | Homo sapiens              | FLJ36569; MS         | 0.00242518 | 0.00655805 | 3.87432132 |
| MPV17L2     | NM_032683.1 | MPV17L2     | 19 | Homo sapiens              | MGC110861; I         | 0.00306155 | 0.00786038 | 3.83411529 |
| NASP        | NM_172164.1 | NASP        | 1  | Homo sapiens              | MGC20372; M          | 2.75E-05   | 0.00023469 | 3.82867332 |
| ABCF3       | NM_018358.1 | ABCF3       | 3  | Homo sapiens              | EST201864; F         | 0.00159433 | 0.00475761 | 3.82339276 |
| SNORA72     | NR_002581.1 | SNORA72     | 8  | Homo sapiens              | RNU72; U72           | 0.00303697 | 0.00781757 | 3.82155553 |
| SPAG1       | NM_172218.1 | SPAG1       | 8  | Homo sapiens              | HSD-3.8; TPI         | 0.00105179 | 0.00342549 | 3.814681   |
| APOLD1      | NM_030817.1 | APOLD1      | 12 | Homo sapiens              | VERGE; DKFZ          | 0.00054471 | 0.00206339 | 3.81189575 |
| ZNF563      | NM_145276.1 | ZNF563      | 19 | Homo sapiens              | FLJ34797             | 0.00945655 | 0.01921364 | 3.80094031 |
| FANCA       | NM_000135.2 | FANCA       | 16 | Homo sapiens              | FAA; FA; FA1;        | 0.01650161 | 0.02970673 | 3.73963347 |
| NRIP3       | NM_020645.1 | NRIP3       | 11 | Homo sapiens              | NY-SAR-105; C        | 0.00641427 | 0.01408858 | 3.72085462 |
|             | Hs.526528   | HS.526528   | 16 | q08e04.x1                 | Soares_NhHMPu        | 0.01003338 | 0.02013716 | 3.71311228 |
| MMP23B      | NM_006983.1 | MMP23B      | 1  | Homo sapiens              | MIFR-1; MIFR;        | 0.01171389 | 0.02274956 | 3.69908137 |
| LOC645015   | XM_928077.1 | LOC645015   | 11 | PREDICTED: Homo sapiens   | s                    | 0.01099613 | 0.02165355 | 3.67920442 |
| VPREB3      | NM_013378.1 | VPREB3      | 22 | Homo sapiens              | 8HS20; N27C;         | 0.00299153 | 0.00772806 | 3.67447362 |
| ZNF670      | NM_033213.2 | ZNF670      | 1  | Homo sapiens              | FLJ12606; MG         | 0.02261837 | 0.03795806 | 3.66819998 |
| GPER        | NM_001505.1 | GPER        | 7  | Homo sapiens              | LyGPR; DRY12         | 0.0052263  | 0.01197038 | 3.6391281  |
| LOC143188   | NM_00102544 | LOC143188   | 10 | PREDICTED: Homo sapiens   | h                    | 0.0005249  | 0.00200232 | 3.63791621 |
| MGC11082    | XR_079560.1 | MGC11082    |    | PREDICTED: Homo sapiens   | h                    | 0.00415467 | 0.00997195 | 3.63534877 |
|             | Hs.47702    | HS.47702    | 5  | BX111257                  | Soares fetal liver : | 0.0320988  | 0.04961594 | 3.62881826 |
| C14orf147   | NM_138288.2 | C14ORF147   | 14 | Homo sapiens              | MGC24447             | 2.12E-05   | 0.00019455 | 3.61296147 |
| LOC649136   | XM_943597.1 | LOC649136   |    | PREDICTED: Homo sapiens   | h                    | 0.01582888 | 0.02872405 | 3.61018578 |
|             | Hs.549914   | HS.549914   |    | xd29a02.x1                | NCI_CGAP_Ov2:        | 0.01381367 | 0.02582607 | 3.58840165 |
| LOC653127   | XM_931760.1 | LOC653127   | 17 | PREDICTED: Homo sapiens   | s                    | 0.00174426 | 0.00510273 | 3.58388574 |
| EZH1        | NM_001991.2 | EZH1        | 17 | Homo sapiens              | KIAA0388             | 0.01396208 | 0.02605871 | 3.54478807 |
| LOC440421   | XM_934895.1 | LOC440421   | 17 | PREDICTED: Homo sapiens   | s                    | 0.02550151 | 0.04172694 | 3.53225371 |
| LOC145814   | XM_927974.1 | LOC145814   | 15 | PREDICTED: Homo sapiens   | h                    | 0.02324897 | 0.03880065 | 3.52636382 |
|             | Hs.575696   | HS.575696   |    | HESC3_16_C05.g1_A036      | Hu                   | 0.00773713 | 0.01635937 | 3.51543851 |
| LOC10013303 | XR_038070.1 | LOC10013303 | 9  | PREDICTED: Homo sapiens   | n                    | 0.01312813 | 0.02482194 | 3.50502585 |
| LOC642267   | XM_930705.1 | LOC642267   | 11 | PREDICTED: Homo sapiens   | s                    | 0.00293727 | 0.00762414 | 3.50199625 |
| LOC642946   | XM_931870.1 | LOC642946   | 1  | PREDICTED: Homo sapiens   | h                    | 0.00042623 | 0.00170995 | 3.50147125 |
|             | Hs.559766   | HS.559766   | 1  | UI-E-EJ0-ahv-o-12-0-UI.s2 | U                    | 0.02096931 | 0.03577621 | 3.49521811 |
|             | Hs.211930   | HS.211930   |    | PREDICTED: Homo sapiens   | h                    | 0.00932704 | 0.01900023 | 3.49009672 |
| LOC652684   | XM_942287.1 | LOC652684   |    | PREDICTED: Homo sapiens   | s                    | 0.0198617  | 0.03428478 | 3.47497788 |
| DDX60       | NM_017631.3 | DDX60       | 4  | Homo sapiens              | FLJ20035; FLJ        | 0.0178476  | 0.03149337 | 3.42205812 |
| GUCY1B2     | NM_004129.2 | GUCY1B2     | 13 | Homo sapiens              | GC-SB2               | 0.02176435 | 0.03683197 | 3.37506083 |
| NSD1        | NM_022455.3 | NSD1        | 5  | Homo sapiens              | MGC12997; NSD1       | 0.00038628 | 0.00158122 | 3.36332427 |
|             | Hs.570966   | HS.570966   | 5  | 602424629F1               | NIH_MGC_14           | 1.15E-05   | 0.00012147 | 3.31357554 |
| CTRL        | NM_001907.1 | CTRL        | 16 | Homo sapiens              | CTRL1; MGC70         | 2.27E-05   | 0.00020389 | 3.31286207 |
|             | Hs.565987   | HS.565987   | 3  | UI-H-EI1-aza-j-19-0-UI.s1 | N                    | 0.00937376 | 0.01907039 | 3.30010584 |
| C1orf203    | NR_024125.1 | C1ORF203    |    | PREDICTED: Homo sapiens   | chromosome 1         | 0.00913502 | 0.01866856 | 3.29773463 |
|             | Hs.579870   | HS.579870   | 19 | QV4-OT0035-090300-133-h1  |                      | 0.01346146 | 0.02532441 | 3.28614165 |
| OR2Y1       | NM_00100165 | OR2Y1       | 5  | Homo sapiens              | OR5-2                | 0.00816922 | 0.0170934  | 3.27083718 |
|             | Hs.282470   | HS.282470   |    | AV651250                  | GLC Homo sapiens     | 0.01999191 | 0.03443298 | 3.27019237 |
| LRIG1       | NM_015541.2 | LRIG1       | 3  | Homo sapiens              | LIG-1; LIG1; I       | 0.00073981 | 0.00261133 | 3.27018977 |
| REP15       | NM_00102987 | REP15       | 12 | Homo sapiens              | RAB15 effecto        | 0.0105419  | 0.02092974 | 3.229586   |
| LOC650062   | XM_939151.1 | LOC650062   |    | PREDICTED: Homo sapiens   | s                    | 0.00748468 | 0.01593407 | 3.19253754 |
| LOC643432   | XM_932844.1 | LOC643432   | 6  | PREDICTED: Homo sapiens   | h                    | 0.00859087 | 0.01777714 | 3.1910758  |
| LRRC8C      | NM_032270.2 | LRRC8C      | 1  | Homo sapiens              | AD158; FAD15         | 0.00359868 | 0.00893137 | 3.18693013 |
| SNORA5C     | NR_002991.1 | SNORA5C     | 7  | Homo sapiens              | ACA5c                | 0.03136709 | 0.04868574 | 3.16825917 |
| LOC10013189 | XM_00172286 | LOC10013189 |    | PREDICTED: Homo sapiens   | h                    | 0.00159586 | 0.00476087 | 3.16083155 |
| TRAF3IP1    | NM_015650.2 | TRAF3IP1    | 2  | Homo sapiens              | MIP-T3; DKFZ         | 0.00078777 | 0.00272832 | 3.15403776 |
| LOC10013280 | XR_039272.1 | LOC10013280 |    | PREDICTED: Homo sapiens   | n                    | 0.01508783 | 0.02767503 | 3.15134207 |
| LOC10012990 | XM_00172603 | LOC10012990 | 6  | PREDICTED: Homo sapiens   | h                    | 0.01905657 | 0.0331424  | 3.14592425 |
| HAUS5       | NM_015302.1 | HAUS5       | 19 | Homo sapiens              | HAUS augmin-         | 0.00851996 | 0.01765732 | 3.14212902 |
| TMEM150B    | XM_209187.5 | TMEM150B    | 19 | Homo sapiens              | transmembran         | 0.00515481 | 0.01184158 | 3.13954391 |
| LOC732172   | Hs.515479   | LOC732172   |    | PREDICTED: Homo sapiens   | h                    | 0.01851227 | 0.03238754 | 3.13371849 |
| TIGD2       | NM_145715.1 | TIGD2       | 4  | Homo sapiens              | DKFZp667D13          | 0.01079839 | 0.02133761 | 3.13040174 |
| LOC644632   | XM_00171499 | LOC644632   | 9  | PREDICTED: Homo sapiens   | s                    | 0.00389918 | 0.00950781 | 3.12452515 |
|             | Hs.544713   | HS.544713   | 6  | zt62c04.s1                | Soares_testis_NH     | 0.02511266 | 0.04119613 | 3.11133937 |
| LOC643342   | XR_016301.2 | LOC643342   | 9  | PREDICTED: Homo sapiens   | n                    | 0.00621742 | 0.0137479  | 3.09741352 |
| UCN         | NM_003353.2 | UCN         | 2  | Homo sapiens              | MGC129974; I         | 0.00488063 | 0.01137522 | 3.09278804 |
| MORN4       | NM_178832.2 | MORN4       | 10 | Homo sapiens              | bA548K23.4; I        | 0.00536728 | 0.01221349 | 3.06626257 |
| BCL2A1      | NM_004049.2 | BCL2A1      | 15 | Homo sapiens              | GRS; ACC-1; I        | 0.03186964 | 0.0493038  | 3.05704455 |
| KLK10       | NM_145888.1 | KLK10       | 19 | Homo sapiens              | NES1; PRSSL1         | 0.02337192 | 0.03896396 | 3.05192046 |
| LOC653060   | XM_925779.1 | LOC653060   | 9  | PREDICTED: Homo sapiens   | s                    | 0.00797873 | 0.01674316 | 3.04362216 |
| NPAL3       | NM_020448.2 | NPAL3       | 1  | Homo sapiens              | RP3-462023.3         | 1.81E-06   | 3.45E-05   | 3.03800288 |
| LOC649765   | XM_938835.1 | LOC649765   |    | PREDICTED: Homo sapiens   | s                    | 0.00137654 | 0.00423442 | 3.03037322 |
|             | Hs.550193   | HS.550193   | 5  | Human unidentified        | mRNA, p              | 0.00046754 | 0.00183107 | 3.02809482 |
| LOC648283   | XR_038536.1 | LOC648283   |    | PREDICTED: Homo sapiens   | n                    | 0.03001879 | 0.04714512 | 3.01256329 |



## 2.0 Upreg

|             |             |             |    |                           |                  |            |            |            |
|-------------|-------------|-------------|----|---------------------------|------------------|------------|------------|------------|
| BBS7        | NM_018190.2 | BBS7        | 4  | Homo sapiens              | FLJ10715; BB     | 0.00076108 | 0.00265963 | 2.99989269 |
| FAM75B      | NM_00109880 | FAM75B      | 9  | Homo sapiens              | C9orf36B; bA     | 0.02965782 | 0.04669967 | 2.97634139 |
| FRZB        | NM_001463.2 | FRZB        | 2  | Homo sapiens              | FRZB-1; FRZB     | 0.00628943 | 0.01386762 | 2.96751005 |
| HDAC7       | NM_00109841 | HDAC7       | 12 | Homo sapiens              | DKFZP586J09      | 0.0149432  | 0.02747465 | 2.96106029 |
| FLJ27365    | NM_207477.1 | FLJ27365    | 22 | Homo sapiens              | FLJ27365 prot    | 0.02141652 | 0.0363793  | 2.95325953 |
| L3MBTL4     | NM_173464.1 | L3MBTL4     |    | Homo sapiens              | HsT1031          | 0.02636408 | 0.04277128 | 2.94295393 |
| INPP5A      | XM_936595.1 | INPP5A      |    | PREDICTED: Homo sapiens   | ir               | 0.01678386 | 0.03010514 | 2.94176438 |
| RBMV2FP     | NR_002193.1 | RBMV2FP     |    | Homo sapiens              | MGC26641         | 0.0303487  | 0.04950536 | 2.94014777 |
| TINAG       | NM_014464.2 | TINAG       | 6  | Homo sapiens              | TIN1; TIN-AG;    | 0.00681095 | 0.01481911 | 2.92018459 |
| SNORD53     | NR_002741.1 | SNORD53     | 2  | Homo sapiens              | RNU53; U53       | 0.00260617 | 0.00693872 | 2.91025097 |
| TAS2R49     | NM_176889.1 | TAS2R49     |    | Homo sapiens              | MGC119118; I     | 0.0084823  | 0.01759267 | 2.89862969 |
| LOC644781   | XM_496584.2 | LOC644781   | 9  | PREDICTED: Homo sapiens   | s                | 0.03160718 | 0.04897445 | 2.89309816 |
| LOC652353   | XM_941781.1 | LOC652353   |    | PREDICTED: Homo sapiens   | s                | 0.00037118 | 0.00153385 | 2.88488682 |
| LOC648665   | XR_042388.1 | LOC648665   |    | PREDICTED: Homo sapiens   | n                | 0.00982333 | 0.01980703 | 2.8765322  |
|             | Hs.130590   | Hs.130590   |    | BX105859                  | Soares_testis_NH | 0.00367265 | 0.00908797 | 2.86960573 |
| DCDC1       | NM_181807.1 | DCDC1       | 11 | Homo sapiens              | doublecortin d   | 0.03195273 | 0.04942532 | 2.84898083 |
|             | Hs.561633   | Hs.561633   |    | UI-E-EJO-ahn-g-14-0-UI.s1 | L                | 0.00399275 | 0.00966871 | 2.8434246  |
| LOC641823   | XM_935705.1 | LOC641823   |    | PREDICTED: Homo sapiens   | s                | 0.02023565 | 0.03476464 | 2.84247027 |
|             | Hs.170534   | Hs.170534   |    | BX094716                  | NCI_CGAP_Kid11   | 0.00315612 | 0.00805937 | 2.84040957 |
| LOC390531   | XM_496025.2 | LOC390531   | 15 | PREDICTED: Homo sapiens   | s                | 0.01324094 | 0.02497875 | 2.81946855 |
| C1orf124    | NM_032018.4 | C1ORF124    | 1  | Homo sapiens              | DKFZP547N04      | 0.00702969 | 0.01515846 | 2.81906119 |
| LOC650823   | XM_939912.1 | LOC650823   |    | PREDICTED: Homo sapiens   | h                | 0.00076008 | 0.00265956 | 2.81468342 |
| LOC653194   | XM_926449.1 | LOC653194   | 6  | PREDICTED: Homo sapiens   | s                | 0.01055822 | 0.02094684 | 2.81060011 |
| DNAJC30     | NM_032317.2 | DNAJC30     | 7  | Homo sapiens              | MGC12943         | 0.00605628 | 0.01347382 | 2.79969013 |
| LOC10019093 | NR_024458.1 | LOC10019093 | 13 | Homo sapiens              | hypothetical L   | 0.00692279 | 0.01498743 | 2.79573134 |
| LBX2        | NM_00100981 | LBX2        | 2  | Homo sapiens              | LP3727           | 0.01766096 | 0.03124013 | 2.78802406 |
| TSPAN1      | NM_005727.2 | TSPAN1      | 1  | Homo sapiens              | NET-1; 90304     | 0.00820678 | 0.01714887 | 2.78426557 |
| LOC646825   | XM_929783.1 | LOC646825   | 19 | PREDICTED: Homo sapiens   | s                | 0.00302433 | 0.00779427 | 2.77503038 |
| LOC649853   | XM_941281.1 | LOC649853   |    | PREDICTED: Homo sapiens   | s                | 0.02673258 | 0.04318859 | 2.7641932  |
| LOC643397   | XM_938878.1 | LOC643397   | 2  | PREDICTED: Homo sapiens   | s                | 0.01383495 | 0.02585695 | 2.76375599 |
| PROK2       | NM_021935.2 | PROK2       | 3  | Homo sapiens              | PK2; BV8; MI     | 0.00988977 | 0.01991884 | 2.74731952 |
| RFXDC2      | NM_022841.2 | RFXDC2      |    | Homo sapiens              | MGC131836; I     | 0.002272   | 0.00621654 | 2.73203978 |
|             | Hs.555595   | Hs.555595   |    | Human (clone xip8)        | mRNA se          | 0.01982771 | 0.03424242 | 2.73196304 |
| FAM90A16    | XM_496952.4 | FAM90A16    | 8  | PREDICTED: Homo sapiens   | fi               | 0.01732998 | 0.03078493 | 2.72893953 |
| LOC647904   | XM_936965.1 | LOC647904   |    | PREDICTED: Homo sapiens   | s                | 0.02804676 | 0.04484511 | 2.72342605 |
|             | Hs.583098   | Hs.583098   |    | DB305811                  | BRAWH3 Homo se   | 0.03058597 | 0.04782165 | 2.72171259 |
| ZNF124      | NM_003431.2 | ZNF124      | 1  | Homo sapiens              | MGC117046; I     | 0.02144306 | 0.0364073  | 2.72101895 |
| LOC645487   | XM_932932.1 | LOC645487   | 20 | PREDICTED: Homo sapiens   | h                | 0.00260866 | 0.00694364 | 2.71686947 |
| LOC648153   | XM_937206.1 | LOC648153   |    | PREDICTED: Homo sapiens   | s                | 0.00396394 | 0.00962683 | 2.70807587 |
| TMEM70      | NM_017866.3 | TMEM70      | 8  | Homo sapiens              | FLJ20533         | 0.00232243 | 0.00633061 | 2.70434087 |
| GABRG2      | NM_198904.1 | GABRG2      | 5  | Homo sapiens              | ECA2; GEFSP      | 0.00092385 | 0.00309315 | 2.68520989 |
| LOC651371   | XM_944620.1 | LOC651371   |    | PREDICTED: Homo sapiens   | h                | 0.02142888 | 0.03638892 | 2.67142336 |
|             | Hs.581554   | Hs.581554   |    | DB114688                  | THYMU2 Homo sa   | 0.01021042 | 0.02040957 | 2.66886238 |
|             | Hs.539123   | Hs.539123   |    | zu74b05.s1                | Soares_testis_NI | 0.00421899 | 0.01009067 | 2.66168203 |
| LOC731444   | XM_925913.1 | LOC731444   |    | PREDICTED: Homo sapiens   | s                | 0.00983826 | 0.01982978 | 2.65637017 |
| ZNF502      | NM_033210.3 | ZNF502      | 3  | Homo sapiens              | FLJ14855; FLJ    | 0.01259764 | 0.02407018 | 2.64306672 |
| LOC642761   | XM_926183.1 | LOC642761   | 16 | PREDICTED: Homo sapiens   | h                | 0.02023647 | 0.03476054 | 2.63526272 |
| ALB         | NM_000477.3 | ALB         | 4  | Homo sapiens              | PRO1341; DK      | 0.01538004 | 0.02811138 | 2.61818047 |
| GMIP        | NM_016573.1 | GMIP        | 19 | Homo sapiens              | GEM interacti    | 0.01496863 | 0.02751211 | 2.61176325 |
| LOC10013355 | XR_038272.1 | LOC10013355 |    | PREDICTED: Homo sapiens   | n                | 0.02742788 | 0.04405648 | 2.60231155 |
| LOC646706   | XM_929652.1 | LOC646706   | 19 | PREDICTED: Homo sapiens   | s                | 0.01267497 | 0.02417968 | 2.58848658 |
| SNX1        | NM_003099.3 | SNX1        | 15 | Homo sapiens              | SNX1A; Vps5;     | 7.86E-05   | 0.00048926 | 2.57296311 |
| LOC642369   | XM_925901.1 | LOC642369   | 11 | PREDICTED: Homo sapiens   | h                | 0.02955378 | 0.04660339 | 2.57057111 |
|             | Hs.523235   | Hs.523235   |    | nq82a06.s1                | NCI_CGAP_Co9     | 0.03124978 | 0.04855219 | 2.56184343 |
| LOC643121   | XM_926493.1 | LOC643121   | 9  | PREDICTED: Homo sapiens   | h                | 0.00720891 | 0.01545904 | 2.55345176 |
|             | Hs.571950   | Hs.571950   |    | ym35h10.s1                | Soares infant br | 0.02068838 | 0.03538023 | 2.54259913 |
| LOC653392   | XM_929544.1 | LOC653392   | 7  | PREDICTED: Homo sapiens   | s                | 0.01865751 | 0.03259441 | 2.53653487 |
|             | Hs.579715   | Hs.579715   |    | DA717721                  | NT2RI2 Homo sa   | 0.01559589 | 0.02841512 | 2.53638848 |
| FUZ         | NM_025129.3 | FUZ         | 19 | Homo sapiens              | FLJ22688; FY     | 0.0201429  | 0.03463814 | 2.52664769 |
|             | Hs.562197   | Hs.562197   |    | 602137688F1               | NIH_MGC_83       | 0.02943518 | 0.04646355 | 2.52109665 |
| LOC729858   | XR_037908.1 | LOC729858   |    | PREDICTED: Homo sapiens   | n                | 0.00198619 | 0.00561257 | 2.51710664 |
| SMARCD3     | NM_003078.3 | SMARCD3     | 7  | Homo sapiens              | Rsc6p; BAF60     | 0.00134363 | 0.004152   | 2.51522691 |
| CIZ1        | NM_012127.2 | CIZ1        | 9  | Homo sapiens              | LSFR1; ZNF35     | 0.0150075  | 0.02757422 | 2.50467042 |
| LOC650796   | XM_939881.1 | LOC650796   |    | PREDICTED: Homo sapiens   | h                | 0.02721239 | 0.04376858 | 2.50403596 |
| LOC643896   | NM_00110138 | LOC643896   | 2  | Homo sapiens              | similar to cAM   | 0.00392408 | 0.00955781 | 2.49830475 |
| MIR25       | NR_029498.1 | MIR25       |    | Homo sapiens              | microRNA 25 (    | 0.01945444 | 0.03371566 | 2.4833448  |
| INHBE       | NM_031479.3 | INHBE       | 12 | Homo sapiens              | MGC4638          | 0.01318144 | 0.02490107 | 2.47949634 |
| SCG5        | NM_003020.1 | SCG5        | 15 | Homo sapiens              | SgV; 7B2; P7E    | 0.01472589 | 0.02717164 | 2.47597686 |
| FIGNL1      | NM_00104276 | FIGNL1      | 7  | Homo sapiens              | fidgetin-like 1  | 1.70E-06   | 3.33E-05   | 2.4728347  |
| LOC647246   | XM_930292.1 | LOC647246   | 1  | PREDICTED: Homo sapiens   | s                | 0.03095773 | 0.04822254 | 2.45705324 |

## 2.0 Upreg

|             |             |             |    |                             |            |            |            |
|-------------|-------------|-------------|----|-----------------------------|------------|------------|------------|
| CLVS2       | NM_00101085 | CLVS2       | 6  | Homo sapiens C6orf213; C6c  | 0.00785618 | 0.0165499  | 2.44862752 |
| LOC645349   | XM_928390.1 | LOC645349   | 1  | PREDICTED: Homo sapiens h   | 0.0013118  | 0.00407333 | 2.44645901 |
|             | Hs.580480   | Hs.580480   | 2  | DA584132 HLUNG2 Homo sa     | 0.00623222 | 0.01377782 | 2.44340985 |
| TINAGL1     | NM_022164.1 | TINAGL1     | 1  | Homo sapiens LIECG3; LCN7   | 0.02431655 | 0.04021797 | 2.44297112 |
| DAPK3       | NM_001348.1 | DAPK3       | 19 | Homo sapiens FLJ36473; ZIF  | 0.00020935 | 0.00099704 | 2.44075272 |
| KIR2DL1     | NM_014218.1 | KIR2DL1     | 19 | Homo sapiens KIR-K65; CL-4  | 0.00753443 | 0.01602117 | 2.43843473 |
| LOC653879   | XM_936226.1 | LOC653879   |    | PREDICTED: Homo sapiens s   | 0.02153308 | 0.03654302 | 2.4311844  |
| LOC554207   | XR_040106.1 | LOC554207   |    | PREDICTED: Homo sapiens h   | 0.0128051  | 0.02438083 | 2.42391283 |
|             | Hs.541100   | Hs.541100   | 18 | ov43g05.x1 Soares_testis_Nl | 0.03148709 | 0.0488023  | 2.41967186 |
| KRTDAP      | NM_207392.1 | KRTDAP      | 19 | Homo sapiens MGC163373; l   | 2.78E-05   | 0.00023646 | 2.41011239 |
|             | Hs.307606   | Hs.307606   | 5  | BX094636 Soares_NFL_T_GE    | 0.01903609 | 0.0331386  | 2.40931577 |
| BATF3       | NM_018664.1 | BATF3       | 1  | Homo sapiens JUNDM01; SNF   | 0.01763372 | 0.03120209 | 2.40160722 |
| SLC22A15    | NM_018420.1 | SLC22A15    | 1  | Homo sapiens FLIPT1; DKFZl  | 0.02030867 | 0.03485702 | 2.40011132 |
| SEMA4A      | NM_022367.2 | SEMA4A      | 1  | Homo sapiens RP11-54H19.2   | 0.0032727  | 0.00827349 | 2.400043   |
|             | Hs.478682   | Hs.478682   | 3  | Homo sapiens cDNA FLJ3109   | 0.00209593 | 0.00584066 | 2.39555363 |
| KLF10       | NM_005655.1 | KLF10       | 8  | Homo sapiens TIEG; EGRA; l  | 0.00693778 | 0.0150109  | 2.39264487 |
| CECR6       | NM_031890.2 | CECR6       | 22 | Homo sapiens cat eye syndrc | 0.00121139 | 0.00382603 | 2.39126784 |
| SALL4       | NM_020436.2 | SALL4       | 20 | Homo sapiens MGC133050; l   | 0.00133655 | 0.00413481 | 2.39115368 |
|             | Hs.362932   | Hs.362932   | 5  | Homo sapiens cDNA FLJ2503   | 0.00696699 | 0.01505014 | 2.38200362 |
| LOC10012907 | XM_00172099 | LOC10012907 |    | PREDICTED: Homo sapiens s   | 0.00692479 | 0.01498878 | 2.37401641 |
| LOC647836   | XM_936893.1 | LOC647836   |    | PREDICTED: Homo sapiens s   | 0.03004808 | 0.04717066 | 2.37019478 |
| CXCL17      | NM_198477.1 | CXCL17      | 19 | Homo sapiens UNQ473; VCC    | 0.03203656 | 0.04953384 | 2.35754354 |
| KRT18P44    | XM_00172046 | KRT18P44    |    | PREDICTED: Homo sapiens k   | 0.00170182 | 0.00500416 | 2.35565737 |
| LOC642515   | XM_926011.1 | LOC642515   | 9  | PREDICTED: Homo sapiens s   | 0.02981617 | 0.04688787 | 2.34844861 |
|             | Hs.22347    | Hs.22347    |    | PREDICTED: Homo sapiens h   | 0.02941389 | 0.04645693 | 2.3417627  |
| TTY5        | NR_001541.1 | TTY5        |    | Homo sapiens TTY5           | 0.00248359 | 0.0066745  | 2.33734837 |
|             | Hs.550118   | Hs.550118   | 1  | oy41f08.s1 Soares_parathyr  | 0.01190502 | 0.02304252 | 2.33659509 |
| NMT2        | NM_004808.2 | NMT2        | 10 | Homo sapiens N-myristoyltra | 0.02405178 | 0.03988323 | 2.33567714 |
|             | Hs.553290   | Hs.553290   |    | HESC3_84_D06.g1_A036 Hu     | 0.01678784 | 0.0301073  | 2.32551405 |
| XK          | NM_021083.2 | XK          |    | Homo sapiens XKR1; KX; Xl   | 0.00975558 | 0.01969235 | 2.32275888 |
| LOC401778   | XM_377343.3 | LOC401778   | 14 | PREDICTED: Homo sapiens s   | 0.02339946 | 0.03899791 | 2.32085121 |
| FLJ44290    | NM_198564.1 | FLJ44290    | 3  | Homo sapiens FLJ44290 prot  | 0.01669511 | 0.02999049 | 2.3177619  |
| ZNF586      | NM_017652.2 | ZNF586      | 19 | Homo sapiens FLJ20070       | 0.02837844 | 0.04523568 | 2.31615143 |
|             | Hs.538979   | Hs.538979   | 11 | Homo sapiens RAG1 mRNA, t   | 0.02256648 | 0.03788268 | 2.31046199 |
| NOD1        | NM_006092.1 | NOD1        | 7  | Homo sapiens NLRC1; CARD    | 0.00288722 | 0.00752657 | 2.29560996 |
| PTPRE       | NM_130435.2 | PTPRE       | 10 | Homo sapiens DKFZp313F13    | 0.01083729 | 0.02139504 | 2.28556539 |
| GRRP1       | NM_024869.1 | GRRP1       | 1  | Homo sapiens RP11-96L14.5   | 0.02059193 | 0.03524301 | 2.27214391 |
|             | Hs.142570   | Hs.142570   | 3  | Homo sapiens clone 24629 nr | 0.01208514 | 0.02329159 | 2.26383239 |
| LOC10012897 | XR_037834.1 | LOC10012897 |    | PREDICTED: Homo sapiens n   | 0.00301579 | 0.00777963 | 2.2562146  |
|             | Hs.158036   | Hs.158036   | 5  | BX118491 NCI_CGAP_Brn23     | 0.01351667 | 0.0254063  | 2.25522897 |
| LOC651617   | XM_940799.1 | LOC651617   |    | PREDICTED: Homo sapiens s   | 0.00971445 | 0.01962755 | 2.25487258 |
|             | Hs.558286   | Hs.558286   | 9  | AV730797 HTF Homo sapiens   | 0.0153081  | 0.02800344 | 2.2450642  |
| CYorf15A    | NM_00100585 | CYORF15A    |    | Homo sapiens MGC131732; l   | 0.00244532 | 0.00660103 | 2.2377583  |
| LOC284296   | NM_175908.3 | LOC284296   | 19 | Homo sapiens hypothetical p | 0.00893024 | 0.01834319 | 2.22602094 |
| UPK1B       | NM_006952.3 | UPK1B       | 3  | Homo sapiens UP1B; UPK1; T  | 0.01810712 | 0.03185822 | 2.22376963 |
| LOC642035   | XM_936105.1 | LOC642035   |    | PREDICTED: Homo sapiens h   | 0.00056247 | 0.00211739 | 2.20797477 |
|             | Hs.197017   | Hs.197017   | 8  | wa17h04.x1 NCI_CGAP_Kid1    | 0.01127186 | 0.02206855 | 2.20653466 |
| RANBP9      | NM_005493.2 | RANBP9      | 6  | Homo sapiens RANBPM         | 0.01000816 | 0.02011628 | 2.20187615 |
| LOC10013391 | XM_00171627 | LOC10013391 |    | PREDICTED: Homo sapiens h   | 0.02493281 | 0.04100012 | 2.1949821  |
|             | Hs.382669   | Hs.382669   | 21 | Homo sapiens cDNA clone IM  | 0.02462723 | 0.04058973 | 2.184632   |
| LOC643234   | XM_931426.1 | LOC643234   | 6  | PREDICTED: Homo sapiens h   | 0.02580095 | 0.04209017 | 2.17998404 |
|             | Hs.555260   | Hs.555260   |    | 17000532215901 GRN_ES H     | 0.01154288 | 0.02250592 | 2.17873139 |
| ETAA1       | NM_019002.2 | ETAA1       | 2  | Homo sapiens ETAA16; FLJ2   | 0.01098304 | 0.0216317  | 2.17572529 |
| LOC441795   | XM_937553.1 | LOC441795   | 17 | PREDICTED: Homo sapiens s   | 0.03152748 | 0.04885793 | 2.17145015 |
| FAM65B      | NM_015864.2 | FAM65B      | 6  | Homo sapiens FAM65B; KIAA   | 0.0275981  | 0.04427103 | 2.17083204 |
| HIST2H2AA4  | NM_00104087 | HIST2H2AA4  | 1  | Homo sapiens H2A/R          | 3.64E-06   | 5.60E-05   | 2.16062377 |
|             | Hs.207074   | Hs.207074   | 9  | Homo sapiens, clone IMAGE:  | 0.03079395 | 0.04805695 | 2.15416991 |
| CD82        | NM_002231.3 | CD82        | 11 | Homo sapiens SAR2; TSPAN2   | 0.00058208 | 0.00218063 | 2.14983026 |
| FLJ10120    | XM_941652.1 | FLJ10120    |    | PREDICTED: Homo sapiens h   | 0.02914429 | 0.0461384  | 2.14958385 |
| SNAP23      | NM_003825.2 | SNAP23      | 15 | Homo sapiens SNAP23A; SN/   | 0.00020404 | 0.00097601 | 2.14678495 |
|             | Hs.377660   | Hs.377660   | 11 | Homo sapiens cDNA FLJ2624   | 0.02712704 | 0.04367655 | 2.14666783 |
| BCAP29      | NM_00100840 | BCAP29      | 7  | Homo sapiens DKFZp686M2C    | 0.01058529 | 0.02098138 | 2.14560781 |
| BLOC1S2     | NM_00100134 | BLOC1S2     | 10 | Homo sapiens RP11-316M21    | 0.02095563 | 0.03576411 | 2.14360333 |
| OPHN1       | NM_002547.1 | OPHN1       |    | Homo sapiens OPN1; MRX60    | 0.02401677 | 0.03983126 | 2.14333403 |
| CCBL2       | NM_00100866 | CCBL2       | 1  | Homo sapiens DKFZp547N11    | 0.00090262 | 0.00303611 | 2.13718522 |
| SRR         | NM_021947.1 | SRR         | 17 | Homo sapiens ILV1; ISO1     | 0.01687886 | 0.03020076 | 2.13301812 |
| LCMT2       | NM_014793.3 | LCMT2       | 15 | Homo sapiens TYW4; PPM2;    | 0.01241101 | 0.02380987 | 2.12632929 |
| EPM2AIP1    | NM_014805.2 | EPM2AIP1    | 3  | Homo sapiens FLJ11207; KIA  | 0.000325   | 0.00138512 | 2.12416783 |
| B4GALNT1    | NM_001478.2 | B4GALNT1    | 12 | Homo sapiens GALGT; GALN/   | 0.0012421  | 0.00389811 | 2.11959051 |
| C3orf17     | NM_00102507 | C3ORF17     | 3  | Homo sapiens DKFZP434F20    | 0.02566574 | 0.04193254 | 2.11705191 |

## 2.0 Upreg

|             |             |              |                                 |            |            |            |
|-------------|-------------|--------------|---------------------------------|------------|------------|------------|
|             | Hs.565917   | HS.565917    | UI-H-BI3-alg-g-11-0-UI.s1 N     | 0.02834766 | 0.04519988 | 2.11610291 |
| TREM2       | NM_018965.1 | TREM2        | 6 Homo sapiens Trem2a; Trem     | 0.0300733  | 0.04719662 | 2.11451944 |
| C8orf44     | NM_019607.1 | C8ORF44      | 8 Homo sapiens FLJ11267         | 0.02512937 | 0.0412111  | 2.11052125 |
| LOC10012881 | XM_00173286 | LOC100128816 | PREDICTED: Homo sapiens A       | 0.00119844 | 0.00379618 | 2.10625769 |
| LOC728975   | XR_042006.1 | LOC728975    | PREDICTED: Homo sapiens n       | 0.02532033 | 0.04146795 | 2.10018907 |
| LOC10013479 | XM_00171880 | LOC10013479  | 7 PREDICTED: Homo sapiens s     | 0.01557702 | 0.02839025 | 2.0948003  |
| LOC648329   | XM_937382.1 | LOC648329    | PREDICTED: Homo sapiens h       | 0.00656012 | 0.01437117 | 2.08604968 |
| EXOC1       | NM_018261.3 | EXOC1        | 4 Homo sapiens SEC3L1; Sec3     | 0.00041886 | 0.00168847 | 2.08458462 |
| SELE        | NM_000450.1 | SELE         | 1 Homo sapiens LECAM2; ESEL     | 0.0081804  | 0.01710691 | 2.08274485 |
| LOC727787   | XM_925796.1 | LOC727787    | 19 PREDICTED: Homo sapiens s    | 0.02636376 | 0.04277714 | 2.08112452 |
| LOC388820   | XR_042089.1 | LOC388820    | 21 PREDICTED: Homo sapiens n    | 0.02920823 | 0.0462127  | 2.08020605 |
| SLC45A4     | NM_00108043 | SLC45A4      | 8 Homo sapiens KIAA1126         | 0.01194035 | 0.02310267 | 2.06671375 |
| GRB10       | NM_005311.3 | GRB10        | 7 Homo sapiens RSS; GRB-IR;     | 0.00383174 | 0.00938124 | 2.06501611 |
| SNX19       | NM_014758.1 | SNX19        | 11 Homo sapiens CHET8; DKFZ;    | 0.00574367 | 0.01289714 | 2.06125332 |
| PRSS22      | NM_022119.3 | PRSS22       | 16 Homo sapiens hBSSP-4; MGC    | 0.00621129 | 0.01373993 | 2.05665751 |
| BCL7A       | NM_020993.3 | BCL7A        | 12 Homo sapiens BCL7            | 0.00352048 | 0.00878745 | 2.05312809 |
| FGGY        | NM_018291.3 | FGGY         | 1 Homo sapiens FLJ10986; RP:    | 0.00395433 | 0.00961208 | 2.05151093 |
| CENTB2      | NM_012287.3 | CENTB2       | 3 Homo sapiens KIAA0041; CN     | 0.01889285 | 0.03293143 | 2.0514402  |
| YPEL3       | NM_031477.3 | YPEL3        | 16 Homo sapiens MGC10500        | 0.00541674 | 0.01229001 | 2.04694296 |
| ZNF48       | NM_152652.1 | ZNF48        | 16 Homo sapiens DKFZp762K01     | 0.00149672 | 0.00453734 | 2.0461887  |
| LOC388381   | XM_936648.1 | LOC388381    | PREDICTED: Homo sapiens h       | 0.03065365 | 0.04787237 | 2.03526438 |
|             | Hs.548645   | HS.548645    | 2 xj40e04.x1 Soares_NFL_T_G     | 0.02042456 | 0.03503932 | 2.0351405  |
| MYOG        | NM_002479.3 | MYOG         | 1 Homo sapiens MYF4; MYOGE      | 0.00792109 | 0.01665114 | 2.03448259 |
| FLJ43276    | NM_207382.1 | FLJ43276     | 15 Homo sapiens FLJ43276 prot   | 0.00121639 | 0.00383736 | 2.03351633 |
|             | Hs.209583   | HS.209583    | 9 UI-H-BW1-anz-d-01-0-UI.s1     | 0.02643196 | 0.04283664 | 2.02932544 |
| FLJ30092    | XM_933560.1 | FLJ30092     | 12 PREDICTED: Homo sapiens A    | 0.02251785 | 0.03781858 | 2.02400043 |
| C20orf133   | NM_080676.4 | C20ORF133    | 20 Homo sapiens RP11-189J1.1    | 0.01166908 | 0.02270311 | 2.02353072 |
| SRPK2       | NM_182692.1 | SRPK2        | 7 Homo sapiens FLJ36101; SFF    | 0.019465   | 0.03372858 | 2.01813017 |
| LOC400891   | NM_00101367 | LOC400891    | 22 Homo sapiens similar to chro | 0.00619105 | 0.0137119  | 2.01169532 |
| NUBP2       | NM_012225.1 | NUBP2        | 16 Homo sapiens CFD1; NUBP1     | 0.00434712 | 0.01034023 | 2.00875806 |
| NOS2        | NM_000625.4 | NOS2         | 17 Homo sapiens nitric oxide sy | 0.03002174 | 0.04713613 | 2.00858245 |
| PHF8        | NM_015107.1 | PHF8         | Homo sapiens ZNF422; MRX;       | 0.01353904 | 0.02542635 | 1.9953009  |
| NCRNA00094  | NR_015427.1 | NCRNA00094   | Homo sapiens non-protein cc     | 0.01734065 | 0.03079885 | 1.99267138 |
|             | Hs.545238   | HS.545238    | 8 ty84b12.x1 NCI_CGAP_Kid11     | 0.01505545 | 0.02762963 | 1.9913146  |
|             | Hs.520750   | HS.520750    | 7 UI-E-EJ0-ahs-a-06-0-UI.s1 U   | 0.00356023 | 0.0088582  | 1.98980643 |
| ATP6V1C1    | NM_001695.3 | ATP6V1C1     | 8 Homo sapiens VATC; FLJ200!    | 9.11E-05   | 0.00054241 | 1.98439782 |
| SLC30A6     | NM_017964.2 | SLC30A6      | 2 Homo sapiens MGC45055; FL     | 0.01177905 | 0.02285569 | 1.98151684 |
| LOC728448   | NR_003929.2 | LOC728448    | 1 Homo sapiens peptidylprolyl   | 0.01800524 | 0.03173034 | 1.97868175 |
| LOC654202   | XM_946257.1 | LOC654202    | PREDICTED: Homo sapiens s       | 0.02454376 | 0.04048287 | 1.97814515 |
|             | Hs.565209   | HS.565209    | 19 Homo sapiens cDNA FLJ3489    | 0.00093007 | 0.00310823 | 1.97396409 |
| CALHM1      | NM_00100141 | CALHM1       | 10 Homo sapiens calcium home    | 0.02786074 | 0.04462646 | 1.97393935 |
| OPN3        | NM_00103001 | OPN3         | 1 Homo sapiens ECPN             | 0.01731632 | 0.03076569 | 1.97337429 |
| CEP97       | NM_024548.2 | CEP97        | 3 Homo sapiens FLJ26462; FLJ    | 0.02904878 | 0.04604085 | 1.96968668 |
| ATP8B2      | NM_00100585 | ATP8B2       | 1 Homo sapiens ATPID; DKFZp     | 0.03112711 | 0.04840312 | 1.96438347 |
| ZNF215      | NM_013250.1 | ZNF215       | 11 Homo sapiens BAZ2            | 0.00037892 | 0.00155694 | 1.96166751 |
| CYorf15B    | NM_032576.2 | CYORF15B     | Homo sapiens chromosome \       | 0.02849204 | 0.04536354 | 1.9592881  |
| C11orf24    | NM_022338.2 | C11ORF24     | 11 Homo sapiens DM4E3           | 0.00382641 | 0.00937242 | 1.95770841 |
| ZNF74       | NM_003426.1 | ZNF74        | 22 Homo sapiens Zfp520; ZNF5    | 0.00408446 | 0.00983819 | 1.95739361 |
| POLR2J      | NM_006234.4 | POLR2J       | 7 Homo sapiens RPB11; MGC7      | 0.00045305 | 0.00178525 | 1.95569475 |
| LOC389203   | XM_371691.4 | LOC389203    | PREDICTED: Homo sapiens h       | 0.00985623 | 0.01985495 | 1.95347848 |
| LOC653081   | XM_925877.1 | LOC653081    | 1 PREDICTED: Homo sapiens s     | 0.01451557 | 0.02688857 | 1.95208414 |
| TBC1D9      | NM_015130.1 | TBC1D9       | 4 Homo sapiens KIAA0882; MC     | 0.00161064 | 0.00479704 | 1.94839711 |
| SFRP1       | NM_003012.3 | SFRP1        | 8 Homo sapiens FRP; FrzA; SA    | 0.01285266 | 0.02443714 | 1.94479891 |
|             | Hs.103173   | HS.103173    | 12 BX100504 Soares_fetal_hear   | 0.03061284 | 0.04783614 | 1.94448552 |
| ACSM2B      | NM_182617.2 | ACSM2B       | 16 Homo sapiens HYST1046; H     | 0.01713232 | 0.03052362 | 1.94272592 |
| FLJ35776    | XM_942115.1 | FLJ35776     | 18 Homo sapiens hypothetical p  | 0.01815638 | 0.03190356 | 1.93901068 |
| SAP18       | NM_005870.3 | SAP18        | 13 Homo sapiens SAP18p; MGC:    | 4.53E-05   | 0.00033532 | 1.93042514 |
| MGC22014    | XM_942026.1 | MGC22014     | PREDICTED: Homo sapiens h       | 0.00885606 | 0.01823217 | 1.92842523 |
| CNR1        | NM_016083.3 | CNR1         | 6 Homo sapiens CNR; CANN6;      | 0.00744202 | 0.0158619  | 1.92699877 |
| LOC10013082 | XR_042474.1 | LOC100130827 | PREDICTED: Homo sapiens n       | 0.02280379 | 0.03820435 | 1.92688631 |
| LOC645812   | XM_928801.1 | LOC645812    | 17 PREDICTED: Homo sapiens s    | 0.01613585 | 0.02920307 | 1.92228411 |
| LOC401152   | NM_00100170 | LOC401152    | 4 Homo sapiens HCV F-transac    | 0.01234654 | 0.02370291 | 1.91942186 |
|             | Hs.547160   | HS.547160    | 8 Homo sapiens, clone IMAGE:    | 0.01704255 | 0.03041354 | 1.91816629 |
|             | Hs.382309   | HS.382309    | 6 Homo sapiens cDNA clone IM    | 0.00297109 | 0.00769172 | 1.91734344 |
|             | Hs.534437   | HS.534437    | 14 Homo sapiens T cell antigen  | 0.01993638 | 0.03438092 | 1.91581435 |
| LOC642072   | XM_936152.1 | LOC642072    | PREDICTED: Homo sapiens s       | 0.00277881 | 0.00730706 | 1.90702235 |
| LOC642076   | XM_00171749 | LOC642076    | 6 PREDICTED: Homo sapiens s     | 0.0017735  | 0.0005166  | 1.90430933 |
| LOC10012955 | NR_024618.1 | LOC10012955  | 3 Homo sapiens hypothetical L   | 0.00250347 | 0.00671131 | 1.90394613 |
| VPS18       | NM_020857.2 | VPS18        | 15 Homo sapiens KIAA1475; PE    | 0.00022166 | 0.00103791 | 1.9031413  |
| LOC643047   | XM_926417.1 | LOC643047    | 5 PREDICTED: Homo sapiens s     | 0.01798603 | 0.03170675 | 1.90137343 |

2.0 Upreg

|            |                        |   |                                  |            |            |            |
|------------|------------------------|---|----------------------------------|------------|------------|------------|
| SPTLC2     | NM_004863.2 SPTLC2     |   | 14 Homo sapiens SPT2; KIAA05     | 0.0282175  | 0.04505182 | 1.9007225  |
| RNU1F1     | NR_004402.1 RNU1F1     |   | 14 Homo sapiens UIF; HSD7        | 0.00013832 | 0.00072587 | 1.89833244 |
| LOC646717  | XM_929666.1 LOC646717  |   | 22 PREDICTED: Homo sapiens h     | 0.02436444 | 0.04027878 | 1.89815908 |
| ATRN       | NM_139322.1 ATRN       |   | 20 Homo sapiens DPPT-L; MGC1     | 0.02253278 | 0.03783781 | 1.89712402 |
| EDEM3      | NM_025191.2 EDEM3      |   | 1 Homo sapiens C1orf22           | 0.0097638  | 0.01970162 | 1.89684479 |
| EPHX1      | NM_000120.2 EPHX1      |   | 1 Homo sapiens EPOX; MEH; E      | 4.73E-05   | 0.00034593 | 1.89432896 |
| C10orf26   | NM_017787.3 C10ORF26   |   | 10 Homo sapiens MGC125648; I     | 0.00085637 | 0.0029139  | 1.89358804 |
| POLR3D     | NM_001722.2 POLR3D     |   | 8 Homo sapiens RPC53; BN51T      | 0.00372185 | 0.00919087 | 1.89269157 |
|            | Hs.400131 HS.400131    |   | 21 UI-E-EJO-air-c-22-0-UI.r1 UI- | 0.01832799 | 0.03214794 | 1.8899152  |
| C5orf41    | NM_153607.1 C5ORF41    |   | 5 Homo sapiens DKFZp686G20       | 0.02178095 | 0.03684859 | 1.88717864 |
| LOC729198  | XR_016035.1 LOC729198  |   | PREDICTED: Homo sapiens n        | 0.02250474 | 0.03780823 | 1.88472172 |
| RPL23AP53  | NR_003572.2 RPL23AP53  |   | 8 Homo sapiens ribosomal prot    | 0.00062971 | 0.00230893 | 1.88214255 |
|            | Hs.574069 HS.574069    |   | 12 ou17h07.s1 Soares_NFL_T_C     | 0.01431433 | 0.0265883  | 1.88022764 |
| LOC641999  | XM_936046.1 LOC641999  |   | PREDICTED: Homo sapiens h        | 0.02434633 | 0.04025498 | 1.87632609 |
| LOC728066  | XR_000634.1 LOC728066  |   | 2 PREDICTED: Homo sapiens h      | 0.00383621 | 0.00939008 | 1.87536953 |
| PAFAH2     | NM_000437.2 PAFAH2     |   | 1 Homo sapiens HSD-PLA2; FL      | 0.007925   | 0.01665614 | 1.86099267 |
| TOX4       | NM_014828.1 TOX4       |   | 14 Homo sapiens KIAA0737; LC     | 0.01167835 | 0.02271301 | 1.86072516 |
| KBTBD9     | XM_940375.1 KBTBD9     |   | 2 PREDICTED: Homo sapiens k      | 7.00E-05   | 0.00045174 | 1.86002971 |
|            | Hs.538716 HS.538716    |   | 11 ob56a07.s1 NCI_CGAP_GCB:      | 0.01286557 | 0.02445313 | 1.85654558 |
| ARSD       | NM_009589.2 ARSD       | X | 8 Homo sapiens arylsulfatase I   | 0.00593623 | 0.01325014 | 1.85370193 |
| LOC642216  | XM_942785.1 LOC642216  |   | PREDICTED: Homo sapiens h        | 0.02603774 | 0.04239373 | 1.84697401 |
| HIST2H2AC  | NM_003517.2 HIST2H2AC  |   | 1 Homo sapiens H2AFQ; MGC7       | 2.15E-05   | 0.0001966  | 1.84690348 |
| IGHMBP2    | NM_002180.1 IGHMBP2    |   | 11 Homo sapiens SMARD1; SML      | 0.01827932 | 0.03208846 | 1.84081788 |
| LOC728452  | XM_932756.1 LOC728452  |   | 5 PREDICTED: Homo sapiens s      | 0.00525332 | 0.01201959 | 1.83911816 |
| SLC48A1    | NM_017842.2 SLC48A1    |   | 12 Homo sapiens solute carrier f | 0.00078649 | 0.00272476 | 1.83258048 |
| OS9        | NM_006812.2 OS9        |   | 12 Homo sapiens amplified in os  | 0.00268531 | 0.0071059  | 1.82184894 |
| LOC151457  | XR_038833.1 LOC151457  |   | PREDICTED: Homo sapiens n        | 0.02317727 | 0.03870476 | 1.81978651 |
| LOC650737  | XM_944786.1 LOC650737  |   | PREDICTED: Homo sapiens h        | 0.00084884 | 0.00289191 | 1.81496461 |
| LCAP       | XM_927025.1 LCAP       | X | Homo sapiens lung carcinom.      | 0.00402997 | 0.00973932 | 1.81197182 |
| SMARCA2    | NM_003070.3 SMARCA2    |   | 9 Homo sapiens Sth1p; SNF2L      | 5.87E-05   | 0.00039855 | 1.81100252 |
| LOC654069  | XM_945683.1 LOC654069  |   | PREDICTED: Homo sapiens s        | 0.00065434 | 0.00237996 | 1.80487173 |
| CYB561D2   | NM_007022.3 CYB561D2   |   | 3 Homo sapiens TSP10; 101F6      | 0.00071324 | 0.0025398  | 1.80439801 |
| LOC653313  | XM_926835.1 LOC653313  | X | PREDICTED: Homo sapiens s        | 0.00636442 | 0.0139989  | 1.8016586  |
| RNF187     | XM_047499.9 RNF187     |   | 1 PREDICTED: Homo sapiens r      | 0.01103789 | 0.02172005 | 1.80102323 |
| ZFAND3     | NM_021943.1 ZFAND3     |   | 6 Homo sapiens FLJ13222; TE)     | 0.00066314 | 0.00239673 | 1.79902144 |
| LOC441066  | XM_496741.2 LOC441066  |   | 5 PREDICTED: Homo sapiens s      | 0.01957693 | 0.0338847  | 1.79321976 |
| NCRNA00081 | NR_024142.1 NCRNA00081 |   | 10 Homo sapiens non-protein cc   | 0.02530374 | 0.04145953 | 1.78897713 |
| SH3BP2     | NM_003023.2 SH3BP2     |   | 4 Homo sapiens CRPM; CRBM;       | 0.01587833 | 0.02879934 | 1.78602705 |
|            | Hs.530910 HS.530910    |   | 12 BX094949 Soares infant brai   | 0.03088396 | 0.04815594 | 1.78381134 |
| FAM8A1     | NM_016255.1 FAM8A1     |   | 6 Homo sapiens FLJ23721; AH      | 7.84E-05   | 0.00048879 | 1.7745717  |
| MANEA      | XM_938989.1 MANEA      |   | PREDICTED: Homo sapiens n        | 6.26E-05   | 0.0004167  | 1.77400597 |
|            | Hs.538134 HS.538134    |   | 1 7b56d05.x1 NCI_CGAP_Lu24       | 0.00756652 | 0.01607367 | 1.77392373 |
| PHACTR1    | NM_030948.1 PHACTR1    |   | 6 Homo sapiens RPEL; MGC12       | 0.00172451 | 0.00505721 | 1.76781147 |
| ZADH2      | NM_175907.3 ZADH2      |   | 18 Homo sapiens MGC45594         | 0.00116325 | 0.00372048 | 1.76751003 |
| RHPN1      | NM_052924.1 RHPN1      |   | 8 Homo sapiens ODF5; RHPN;       | 0.00221487 | 0.00608626 | 1.76444068 |
| WDFY3      | NM_178583.1 WDFY3      |   | 4 Homo sapiens ALFY; KIAA09      | 0.02943802 | 0.04646128 | 1.75792914 |
| SRA1       | NM_00103523 SRA1       |   | 5 Homo sapiens MGC87674; SI      | 0.00060392 | 0.00224696 | 1.74861595 |
| LACTB      | NM_171846.1 LACTB      |   | 15 Homo sapiens FLJ14902; G2     | 0.00080267 | 0.00276846 | 1.73802004 |
| LOC162073  | NM_00103484 LOC162073  |   | 16 Homo sapiens MGC126798; I     | 0.00378455 | 0.00929502 | 1.73683139 |
| KIAA0895   | NM_015314.1 KIAA0895   |   | 7 Homo sapiens KIAA0895 (KI      | 0.02268008 | 0.03802053 | 1.73555615 |
| FLJ20489   | NM_017842.1 FLJ20489   |   | 12 Homo sapiens hypothetical p   | 0.0049684  | 0.01152049 | 1.7327118  |
| TRAPPC6A   | NM_024108.1 TRAPPC6A   |   | 19 Homo sapiens MGC2650; TR      | 0.00220582 | 0.00606907 | 1.73201311 |
| C7orf54    | NM_014411.2 C7ORF54    |   | 7 Homo sapiens NSG-X; NAG8;      | 0.00863605 | 0.01786043 | 1.72794906 |
| IMPACT     | NM_018439.1 IMPACT     |   | 18 Homo sapiens MGC33718         | 0.01420862 | 0.02644619 | 1.72304175 |
| LOC730347  | XM_926614.1 LOC730347  |   | PREDICTED: Homo sapiens s        | 0.0016585  | 0.00489932 | 1.72213041 |
| CCRK       | NM_012119.3 CCRK       |   | 9 Homo sapiens p42; CDCH         | 0.00487934 | 0.01137466 | 1.71725528 |
| LOC642864  | XM_926255.1 LOC642864  |   | 1 PREDICTED: Homo sapiens h      | 0.02662751 | 0.04306365 | 1.71133115 |
| SLC26A2    | NM_000112.2 SLC26A2    |   | 5 Homo sapiens DTDST; MSTP:      | 0.00339323 | 0.0085089  | 1.70894291 |
| LOC390748  | XM_372648.3 LOC390748  |   | PREDICTED: Homo sapiens s        | 0.01196046 | 0.02312923 | 1.69940578 |
| LLGL2      | XM_946153.1 LLGL2      |   | PREDICTED: Homo sapiens k        | 0.00248058 | 0.00666969 | 1.69855032 |
| RFTN1      | NM_015150.1 RFTN1      |   | 3 Homo sapiens PIG9; RAFTLI      | 0.00016783 | 0.00084014 | 1.69531945 |
| RIN3       | NM_024832.1 RIN3       |   | 14 Homo sapiens FLJ11700; FLJ    | 0.02251119 | 0.03781323 | 1.69202139 |
| TAGLN      | NM_00100152 TAGLN      |   | 11 Homo sapiens TAGLN1; WS3      | 0.01200179 | 0.02318853 | 1.6911224  |
| NOS2A      | NM_153292.1 NOS2A      |   | 17 Homo sapiens HEP-NOS; INC     | 0.00065951 | 0.00239076 | 1.69101095 |
| OR8J3      | NM_00100406 OR8J3      |   | 11 Homo sapiens OR11-173         | 0.00638207 | 0.01402919 | 1.68461921 |
| NR1H2      | NM_007121.2 NR1H2      |   | 19 Homo sapiens NER; LXR-b; L    | 0.01408764 | 0.02623899 | 1.68340729 |
| C1orf210   | NM_182517.1 C1ORF210   |   | 1 Homo sapiens MGC52423          | 0.03214714 | 0.04968361 | 1.68212384 |
| ZNF532     | NM_018181.4 ZNF532     |   | 18 Homo sapiens FLJ10697         | 0.00011225 | 0.00062691 | 1.67473926 |
| RHBDL3     | NM_138328.2 RHBDL3     |   | 17 Homo sapiens RHBDL4; FLJ4     | 1.49E-05   | 0.00014806 | 1.67327025 |
| SIRT7      | NM_016538.1 SIRT7      |   | 17 Homo sapiens SIR2L7; MGC1     | 5.14E-05   | 0.00036435 | 1.67168432 |

## 2.0 Upreg

|             |                          |                                |            |            |            |
|-------------|--------------------------|--------------------------------|------------|------------|------------|
| RNF121      | NM_018320.3 RNF121       | 11 Homo sapiens FLJ11099       | 0.00062643 | 0.00230079 | 1.66955193 |
|             | Hs.426929 HS.426929      | 21 UI-H-FG0-bcw-h-18-0-UI.s1   | 0.01222063 | 0.02349856 | 1.66306201 |
|             | Hs.550111 HS.550111      | 1 AV647906 GLC Homo sapien:    | 0.02647956 | 0.04288181 | 1.65906355 |
| OMG         | NM_002544.3 OMG          | 17 Homo sapiens OMG            | 0.0062469  | 0.01379906 | 1.6590172  |
|             | Hs.154336 HS.154336      | 9 Homo sapiens clone 24583 rr  | 0.00286748 | 0.00747871 | 1.6559357  |
| LOC400304   | XM_375152.3 LOC400304    | 15 PREDICTED: Homo sapiens s   | 2.14E-05   | 0.00019603 | 1.6543417  |
| HEXDC       | NM_173620.1 HEXDC        | 17 Homo sapiens FLJ23825       | 0.00018171 | 0.00089601 | 1.65319353 |
| LOC649800   | XM_938870.1 LOC649800    | PREDICTED: Homo sapiens s      | 0.03045128 | 0.04763847 | 1.65298299 |
| RELL1       | NM_00108540 RELL1        | 4 Homo sapiens MGC50583; Fl    | 1.57E-05   | 0.00015398 | 1.64956797 |
| WWTR1       | NM_015472.3 WWTR1        | 3 Homo sapiens TAZ; DKFZP58    | 0.02716114 | 0.04371202 | 1.64869429 |
| RCADH5      | XM_00171439 RCADH5       | 6 PREDICTED: Homo sapiens s    | 0.00686452 | 0.01489689 | 1.64774414 |
| LOC10012827 | XM_00172555 LOC10012827  | 9 PREDICTED: Homo sapiens h    | 0.00783582 | 0.01651661 | 1.64268504 |
| LOC728969   | XM_00113292 LOC728969    | 1 PREDICTED: Homo sapiens s    | 0.00035628 | 0.00148867 | 1.64195409 |
| C20orf91    | XM_945481.1 C20ORF91     | PREDICTED: Homo sapiens c      | 0.0019579  | 0.00554993 | 1.63945999 |
| DST         | NM_020388.2 DST          | 6 Homo sapiens CATX-15; KIA    | 0.01149534 | 0.02243738 | 1.63674817 |
| SLC31A2     | NM_001860.1 SLC31A2      | 9 Homo sapiens hCTR2; CTR2;    | 0.00492293 | 0.01143701 | 1.63223931 |
| TRAK1       | NM_014965.2 TRAK1        | 3 Homo sapiens OIP106          | 0.01494401 | 0.02747149 | 1.63108685 |
| FCAMR       | NM_032029.2 FCAMR        | Homo sapiens FCA/MR; FKSC      | 0.01575029 | 0.02861487 | 1.63006347 |
| LOC644624   | XM_934133.1 LOC644624    | 4 PREDICTED: Homo sapiens h    | 0.0019238  | 0.00547757 | 1.61890298 |
| LAMA2       | NM_000426.3 LAMA2        | 6 Homo sapiens LAMM            | 0.02235179 | 0.03762107 | 1.61167339 |
| ING3        | NM_198267.1 ING3         | 7 Homo sapiens FLJ20089; p4;   | 0.01565636 | 0.02851094 | 1.61032379 |
| THAP4       | NM_015963.4 THAP4        | 2 Homo sapiens CGI-36          | 0.00589343 | 0.01317354 | 1.60973498 |
| UAP1L1      | NM_207309.1 UAP1L1       | 9 Homo sapiens RP11-229P13.    | 0.02450351 | 0.04043489 | 1.60311836 |
| CXorf40A    | NM_178124.3 CXorf40A X   | Homo sapiens EOLA1; CXorf      | 0.00137172 | 0.00422319 | 1.60228214 |
| H2AFJ       | NM_177925.1 H2AFJ        | 12 Homo sapiens FLJ10903; MG   | 6.92E-05   | 0.00044735 | 1.59411955 |
| ZNF574      | NM_022752.3 ZNF574       | 19 Homo sapiens FP972; FLJ22   | 0.02590504 | 0.04221562 | 1.58982104 |
| CBLB        | NM_170662.3 CBLB         | 3 Homo sapiens DKFZp779F14     | 0.00166129 | 0.00490355 | 1.58855683 |
| HIST1H1C    | NM_005319.3 HIST1H1C     | 6 Homo sapiens MGC3992; H1     | 2.55E-06   | 4.37E-05   | 1.58713972 |
| HBEGF       | NM_001945.1 HBEGF        | 5 Homo sapiens DTS; DTSF; H1   | 5.00E-05   | 0.00035794 | 1.58324586 |
| ERI3        | NM_024066.1 ERI3         | 1 Homo sapiens MGC2683; PIN    | 0.00912021 | 0.01864882 | 1.58187541 |
| FAM176A     | NM_00113503 FAM176A      | 2 Homo sapiens family with sei | 0.00206068 | 0.00577202 | 1.58165997 |
| ARHGAP23    | XM_930977.1 ARHGAP23     | 17 PREDICTED: Homo sapiens R   | 0.00467693 | 0.01097104 | 1.58015526 |
| AASDH       | NM_181806.2 AASDH        | 4 Homo sapiens LYS2; ACSF4;    | 0.02025783 | 0.03479173 | 1.57639435 |
| RANBP6      | NM_012416.2 RANBP6       | 9 Homo sapiens RAN binding p   | 0.02354259 | 0.03919438 | 1.57093123 |
| UBE2L3      | NM_003347.2 UBE2L3       | 22 Homo sapiens L-UBC; UBCH7   | 0.00014642 | 0.00075992 | 1.56763049 |
| SPOPL       | NM_00100166 SPOPL        | 2 Homo sapiens speckle-type F  | 0.0004431  | 0.00175686 | 1.56243589 |
| OR52E6      | NM_00100516 OR52E6       | 11 Homo sapiens OR11-58        | 0.02634106 | 0.04275308 | 1.56076747 |
|             | Hs.19339 HS.19339        | 3 Homo sapiens cDNA clone IM   | 2.82E-06   | 4.67E-05   | 1.55922165 |
| LOC643201   | XM_932165.1 LOC643201    | 5 PREDICTED: Homo sapiens h    | 0.00309735 | 0.00792421 | 1.55868516 |
| RGS11       | NM_183337.1 RGS11        | 16 Homo sapiens RS11           | 0.03146957 | 0.04878906 | 1.55821082 |
| GCC2        | NM_014635.3 GCC2         | 2 Homo sapiens KIAA0336; GC    | 0.00261143 | 0.00694932 | 1.55744195 |
| LOC10013424 | XM_00171742 LOC100134241 | PREDICTED: Homo sapiens h      | 0.00135517 | 0.00418052 | 1.55628243 |
| PI4KAP1     | XM_942088.1 PI4KAP1      | 22 Homo sapiens FLJ39405       | 0.00191329 | 0.00545766 | 1.5490082  |
| LQK1        | XR_041452.1 LQK1         | 1 PREDICTED: Homo sapiens n    | 0.00060664 | 0.00225399 | 1.54848434 |
| GMPPB       | NM_021971.1 GMPPB        | 3 Homo sapiens KIAA1851        | 0.00081039 | 0.00279064 | 1.54521484 |
| LOC728686   | XR_038523.1 LOC728686    | PREDICTED: Homo sapiens n      | 0.00211973 | 0.00589187 | 1.54135197 |
| KIAA1468    | NM_020854.2 KIAA1468     | 18 Homo sapiens HsT885; HsT3   | 0.00045688 | 0.00179644 | 1.52829578 |
| ELMOD2      | NM_153702.1 ELMOD2       | 4 Homo sapiens MGC10084; 9     | 0.00390268 | 0.00951421 | 1.52419832 |
| BET1        | NM_005868.3 BET1         | 7 Homo sapiens HBET1; DKFZ     | 0.01113882 | 0.02185533 | 1.52332714 |
| ETFDH       | NM_004453.1 ETFDH        | 4 Homo sapiens MADD; ETFQ      | 4.17E-05   | 0.00031666 | 1.52237142 |
| ELL2        | NM_012081.3 ELL2         | Homo sapiens elongation fac    | 0.00265307 | 0.00703773 | 1.51277128 |
|             | Hs.483906 HS.483906      | Homo sapiens mRNA; cDNA l      | 0.00409017 | 0.00984977 | 1.51200318 |
|             | Hs.130036 HS.130036      | 14 Homo sapiens cDNA FLJ4230   | 0.00012243 | 0.00066497 | 1.50802131 |
| GXYLT1      | XM_290597.6 GXYLT1       | 12 Homo sapiens FLJ43151       | 0.00338549 | 0.0084993  | 1.50788763 |
| LOC643035   | XM_931999.1 LOC643035    | 1 PREDICTED: Homo sapiens s    | 0.00135031 | 0.0041679  | 1.50359716 |
| ATP13A3     | XM_931948.1 ATP13A3      | 3 PREDICTED: Homo sapiens A    | 0.03033027 | 0.04748334 | 1.49814233 |
| GPR83       | NM_016540.2 GPR83        | 11 Homo sapiens GPR72; GIR     | 0.02878567 | 0.04571049 | 1.49696426 |
| GBA         | NM_00100574 GBA          | 1 Homo sapiens GCB; GBA1; G    | 7.40E-05   | 0.00046849 | 1.49642971 |
| LOC390387   | XR_000589.1 LOC390387    | 13 PREDICTED: Homo sapiens s   | 0.02790548 | 0.04467179 | 1.49419422 |
| KIAA1715    | NM_030650.1 KIAA1715     | 2 Homo sapiens LNP; MGC102     | 0.00338026 | 0.00848814 | 1.49327861 |
| LOC729101   | NM_144981.1 LOC729101    | 11 PREDICTED: Homo sapiens n   | 0.00093133 | 0.0031115  | 1.49263348 |
| GMCL1       | NM_178439.3 GMCL1        | 2 Homo sapiens GCL1; BTBD1     | 0.00023348 | 0.00107658 | 1.49260357 |
|             | Hs.572219 HS.572219      | CM3-MT0357-260101-690-b:       | 4.02E-05   | 0.0003072  | 1.49061739 |
| LOC10013183 | XM_00172659 LOC100131831 | PREDICTED: Homo sapiens h      | 0.002214   | 0.00608542 | 1.48797361 |
| GNPDA2      | NM_138335.1 GNPDA2       | 4 Homo sapiens SB52            | 0.00787252 | 0.01657469 | 1.4861147  |
| LYSMD4      | NM_152449.2 LYSMD4       | 15 Homo sapiens MGC99501; Fl   | 0.00016572 | 0.00083341 | 1.48315109 |
| CBY1        | NM_015373.3 CBY1         | 22 Homo sapiens PGEA1; arb1;   | 0.0003762  | 0.00154928 | 1.4779896  |
| GOLGA8G     | NM_00101242 GOLGA8G      | 15 Homo sapiens DKFZp434K05    | 0.0104196  | 0.02073618 | 1.47520902 |
| LOC645236   | XM_928275.1 LOC645236    | 7 PREDICTED: Homo sapiens s    | 0.00680645 | 0.01481525 | 1.46850257 |
| ZNF419      | NM_024691.2 ZNF419       | 19 Homo sapiens ZNF419A; FLJ   | 0.00463513 | 0.01089887 | 1.46810409 |

2.0 Upreg

|           |                       |   |                                |            |            |            |
|-----------|-----------------------|---|--------------------------------|------------|------------|------------|
| SH3BP5L   | NM_030645.1 SH3BP5L   |   | 1 Homo sapiens FLJ33845; KIA   | 0.00015897 | 0.00080845 | 1.4671723  |
| PINX1     | NM_017884.3 PINX1     |   | 8 Homo sapiens LPTS; MGC88     | 0.01242033 | 0.02381933 | 1.46478653 |
| GFOD1     | NM_018988.1 GFOD1     |   | 6 Homo sapiens glucose-fructo  | 0.00366345 | 0.00907141 | 1.46283134 |
| TGOLN2    | NM_006464.2 TGOLN2    |   | 2 Homo sapiens TGN51; MGC1     | 3.12E-05   | 0.00025616 | 1.46140091 |
| IGFALS    | NM_004970.1 IGFALS    |   | 16 Homo sapiens ALS            | 0.00411933 | 0.00990681 | 1.45952752 |
|           | Hs.534680 HS.534680   |   | PREDICTED: Homo sapiens h      | 0.01030225 | 0.02055533 | 1.45851057 |
| B9D2      | NM_030578.2 B9D2      |   | 19 Homo sapiens MGC4093; ICI   | 0.01301499 | 0.02467241 | 1.45834392 |
| GOSR2     | NM_054022.2 GOSR2     |   | 17 Homo sapiens GS27; MEMBR    | 0.02416665 | 0.04002486 | 1.45762225 |
| C16orf93  | NM_00101497 C16ORF93  |   | 16 Homo sapiens MGC104706      | 0.00020299 | 0.00097183 | 1.45626814 |
| LOC646300 | XM_929241.1 LOC646300 |   | PREDICTED: Homo sapiens s      | 0.02267907 | 0.03802471 | 1.45407006 |
| C4orf48   | NM_00114193 C4ORF48   |   | 4 Homo sapiens chromosome 4    | 0.00023377 | 0.00107701 | 1.45238441 |
| POU2F1    | NM_002697.2 POU2F1    |   | 1 Homo sapiens OCT1; OTF1      | 0.02838204 | 0.04523479 | 1.44921995 |
| SCARNA14  | NR_004388.1 SCARNA14  |   | 15 Homo sapiens U100           | 0.00023289 | 0.00107475 | 1.44572323 |
|           | Hs.107418 HS.107418   |   | 5 Homo sapiens cDNA FLJ4185    | 0.00083547 | 0.00285712 | 1.44130813 |
| SNORA49   | NR_002979.2 SNORA49   |   | 12 Homo sapiens small nucleola | 0.0310446  | 0.04832323 | 1.43779572 |
| IFRD1     | NM_001550.2 IFRD1     |   | 7 Homo sapiens PC4; TIS7       | 0.00122283 | 0.00384875 | 1.43657559 |
| CXorf40B  | NM_00101384 CXORF40B  | X | Homo sapiens chromosome 9      | 0.0002102  | 0.00099931 | 1.43400578 |
| SUV420H1  | NM_016028.4 SUV420H1  |   | 11 Homo sapiens MGC21161; M    | 0.01451716 | 0.02688693 | 1.43300989 |
| FLVCR2    | NM_017791.1 FLVCR2    |   | 14 Homo sapiens FLVCR2; C14o   | 0.02938254 | 0.04641416 | 1.42914279 |
| C18orf32  | NM_00103500 C18ORF32  |   | 18 Homo sapiens FLJ23458       | 0.00013898 | 0.00152829 | 1.42790326 |
|           | Hs.570988 HS.570988   |   | 5 Homo sapiens primary neuro   | 0.00048042 | 0.00187006 | 1.42497501 |
| RGPD4     | XM_935060.1 RGPD4     |   | 2 PREDICTED: Homo sapiens R    | 0.03161427 | 0.04897148 | 1.424474   |
|           | Hs.193557 HS.193557   |   | 1 Homo sapiens cDNA FLJ3240    | 0.00488411 | 0.01137845 | 1.42406513 |
| BLCAP     | NM_006698.2 BLCAP     |   | 20 Homo sapiens BC10           | 0.00101896 | 0.00334563 | 1.42342679 |
| KIAA1539  | NM_025182.2 KIAA1539  |   | 9 Homo sapiens P1.11659_5; f   | 0.02839157 | 0.04524334 | 1.42063815 |
| WDR37     | NM_014023.3 WDR37     |   | 10 Homo sapiens KIAA0982; RP   | 0.00027527 | 0.00121809 | 1.42001247 |
| SLC35C2   | NM_173073.2 SLC35C2   |   | 20 Homo sapiens FLJ37039; BA   | 0.01543062 | 0.0281754  | 1.41584451 |
| JAK1      | NM_002227.1 JAK1      |   | 1 Homo sapiens JAK1B; JAK1A    | 0.02418077 | 0.04004215 | 1.41159672 |
| C12orf23  | NM_152261.1 C12ORF23  |   | 12 Homo sapiens FLJ13959; MG   | 0.02503427 | 0.04109234 | 1.40902839 |
| TRAK2     | NM_015049.1 TRAK2     |   | 2 Homo sapiens KIAA0549; GR    | 0.00038693 | 0.00158325 | 1.40623936 |
| MORN2     | NM_194270.1 MORN2     |   | 2 Homo sapiens MGC126131; I    | 0.00046962 | 0.00183722 | 1.40505531 |
| SEMG2     | NM_003008.2 SEMG2     |   | 20 Homo sapiens SGII           | 0.01615652 | 0.02923074 | 1.40392446 |
| C10orf32  | NM_144591.1 C10ORF32  |   | 10 Homo sapiens RP11-753C18.   | 0.00036966 | 0.00152987 | 1.40245197 |
| CD163L1   | NM_174941.4 CD163L1   |   | 12 Homo sapiens M160; CD163I   | 0.00065027 | 0.00236915 | 1.40192976 |
| ZFAND6    | NM_019006.2 ZFAND6    |   | 15 Homo sapiens ZA20D3; AWP    | 2.81E-05   | 0.00023824 | 1.40029971 |
| ARFIP1    | NM_00102559 ARFIP1    |   | 4 Homo sapiens MGC117369; I    | 0.00242403 | 0.00655658 | 1.39784126 |
| BTBD10    | NM_032320.4 BTBD10    |   | 11 Homo sapiens MGC13007; G    | 1.52E-05   | 0.00015033 | 1.39531472 |
| MPPE1     | NM_023075.3 MPPE1     |   | 18 Homo sapiens metallophosph  | 0.00418384 | 0.01003089 | 1.38822292 |
| CLEC11A   | NM_002975.2 CLEC11A   |   | 19 Homo sapiens LSLCL; P47; S  | 0.00159394 | 0.00475774 | 1.38765351 |
| FAM116A   | NM_152678.1 FAM116A   |   | PREDICTED: Homo sapiens fi     | 0.00011858 | 0.00065184 | 1.38632227 |
| LOC440225 | XR_042392.1 LOC440225 |   | PREDICTED: Homo sapiens n      | 0.0230238  | 0.03848988 | 1.3853943  |
| LPCAT1    | NM_024830.3 LPCAT1    |   | 5 Homo sapiens FLJ12443; PF    | 0.00552599 | 0.01249355 | 1.38485712 |
| VPS13B    | NM_152564.3 VPS13B    |   | 8 Homo sapiens COH1; DKFZp     | 0.00875342 | 0.01805164 | 1.384662   |
| RPS4Y2    | NM_00103956 RPS4Y2    | Y | Homo sapiens RPS4Y2P           | 0.00453201 | 0.01071435 | 1.38374614 |
| MED14     | NM_004229.3 MED14     | X | Homo sapiens CXorf4; CRSP      | 0.01974416 | 0.03410897 | 1.38284976 |
| TMEM185A  | NM_032508.1 TMEM185A  | X | Homo sapiens FAM11A; MGC       | 0.01020177 | 0.02039603 | 1.38206406 |
| LOC730820 | NM_030759.1 LOC730820 |   | PREDICTED: Homo sapiens s      | 0.000122   | 0.00066427 | 1.37659998 |
| ENPP4     | NM_014936.3 ENPP4     |   | 6 Homo sapiens KIAA0879; NP    | 0.00378326 | 0.00929395 | 1.37516752 |
| TYROBP    | NM_003332.2 TYROBP    |   | 19 Homo sapiens DAP12; KARAI   | 0.02963792 | 0.04668187 | 1.37295058 |
| DIRC2     | NM_032839.1 DIRC2     |   | 3 Homo sapiens FLJ14784; RC    | 2.32E-05   | 0.00020654 | 1.37126427 |
| GDPD1     | NM_182569.1 GDPD1     |   | 17 Homo sapiens FLJ27503; UG   | 0.03127647 | 0.04857282 | 1.36959251 |
| PRRG1     | NM_000950.1 PRRG1     | X | Homo sapiens PRGP1             | 0.00411209 | 0.00989379 | 1.36781811 |
| FER       | NM_005246.1 FER       |   | 5 Homo sapiens TYK3            | 0.00019285 | 0.00093524 | 1.36671756 |
| HADHA     | NM_000182.3 HADHA     |   | 2 Homo sapiens LCHAD; MGC1     | 0.01893868 | 0.03299544 | 1.36667171 |
| TRIM5     | NM_033092.1 TRIM5     |   | 11 Homo sapiens RNF88; TRIM5   | 0.01242348 | 0.02382117 | 1.366139   |
| LOC643558 | XM_932319.1 LOC643558 |   | 7 PREDICTED: Homo sapiens s    | 0.01815225 | 0.03190662 | 1.36412766 |
| C17orf95  | NM_00108051 C17ORF95  |   | 17 Homo sapiens chromosome 1   | 0.0001143  | 0.00063507 | 1.3637091  |
| LYRM5     | NM_00100166 LYRM5     |   | 12 Homo sapiens LYR motif cont | 0.02247201 | 0.03777077 | 1.36301703 |
| SNRK      | NM_017719.3 SNRK      |   | 3 Homo sapiens HSNFRK; DKF     | 0.00018337 | 0.00090175 | 1.36163592 |
| LOC644799 | XM_934554.1 LOC644799 |   | 20 PREDICTED: Homo sapiens h   | 7.17E-07   | 1.85E-05   | 1.36147303 |
| C1GALT1C1 | NM_00101155 C1GALT1C1 | X | Homo sapiens MGC19947; C       | 0.00046002 | 0.00180489 | 1.35857489 |
| C1orf66   | NM_015997.2 C1ORF66   |   | 1 Homo sapiens CGI-41          | 0.00141455 | 0.00433416 | 1.35691148 |
| NFKB2     | NM_00107749 NFKB2     |   | 10 Homo sapiens LYT10; LYT-10  | 0.01339246 | 0.02522517 | 1.35467472 |
| MPV17     | NM_002437.3 MPV17     |   | 2 Homo sapiens SYM1            | 1.28E-05   | 0.00013163 | 1.35377465 |
| FBXO8     | NM_012180.2 FBXO8     |   | 4 Homo sapiens FBS; FBX8; D    | 0.00358864 | 0.00891257 | 1.35273916 |
| RRM2      | NM_001034.1 RRM2      |   | 2 Homo sapiens RRM2; R2        | 6.77E-05   | 0.00044203 | 1.35242597 |
| PTRH1     | NM_00100291 PTRH1     |   | 9 Homo sapiens MGC51999; P     | 0.00217226 | 0.00599799 | 1.35217513 |
| SLC31A1   | NM_001859.2 SLC31A1   |   | 9 Homo sapiens hCTR1; COPT1    | 0.00433778 | 0.01032253 | 1.35146899 |
| PKD2      | NM_000297.2 PKD2      |   | 4 Homo sapiens PC2; PKD4; A    | 0.01536616 | 0.02809073 | 1.35071112 |
| AYP1p1    | XR_001434.1 AYP1P1    |   | PREDICTED: Homo sapiens A      | 0.01656608 | 0.02980304 | 1.34771462 |

## 2.0 Upreg

|           |             |           |    |              |                            |            |            |            |
|-----------|-------------|-----------|----|--------------|----------------------------|------------|------------|------------|
| ITPK1     | NM_014216.3 | ITPK1     | 14 | Homo sapiens | ITRPK1                     | 0.00506335 | 0.01168829 | 1.34747288 |
| LOC647346 | XM_942836.1 | LOC647346 |    |              | PREDICTED: Homo sapiens s  | 0.0004053  | 0.0016405  | 1.34498487 |
| LOC255783 | XR_001409.1 | LOC255783 | 19 | Homo sapiens | hypothetical p             | 0.00011006 | 0.00061913 | 1.34423389 |
| CHIC2     | NM_012110.2 | CHIC2     | 4  | Homo sapiens | BTL; MGC211;               | 8.90E-05   | 0.00053488 | 1.34248508 |
| OKL38     | NM_013370.2 | OKL38     | 16 | Homo sapiens | BDGI                       | 0.00022485 | 0.00104922 | 1.34121959 |
| ABHD15    | NM_198147.1 | ABHD15    | 17 | Homo sapiens | abhydrolase d              | 0.02835806 | 0.04520983 | 1.33753537 |
| ELOVL1    | NM_022821.2 | ELOVL1    | 1  | Homo sapiens | CGI-88; Ssc1               | 0.02005858 | 0.03453139 | 1.33619648 |
| PNPLA2    | NM_020376.2 | PNPLA2    | 11 | Homo sapiens | PEDF-R; FP17!              | 0.00061675 | 0.00227756 | 1.33519208 |
| SEPHS2    | NM_012248.2 | SEPHS2    | 16 | Homo sapiens | SPS2                       | 0.00103348 | 0.00338105 | 1.33252618 |
| CPVL      | NM_031311.3 | CPVL      | 7  | Homo sapiens | HVLP; MGC10!               | 0.00018377 | 0.00090129 | 1.3316905  |
| IRX1      | NM_024337.3 | IRX1      | 5  | Homo sapiens | IRX-5                      | 0.02866817 | 0.04557719 | 1.33090083 |
| MOAP1     | NM_022151.4 | MOAP1     | 14 | Homo sapiens | MAP-1; PNMA4               | 0.00037278 | 0.00153867 | 1.33017793 |
| NRBF2     | NM_030759.3 | NRBF2     | 10 | Homo sapiens | COPR2; COPR                | 0.00879915 | 0.01813563 | 1.3278175  |
| APITD1    | NM_198544.2 | APITD1    | 1  | Homo sapiens | MGC32686; Cl               | 0.00237444 | 0.00644492 | 1.32668452 |
| UBAP2     | NM_018449.2 | UBAP2     | 9  | Homo sapiens | FLJ22435; KIA              | 0.00371119 | 0.00917081 | 1.32636668 |
| NAP1L6    | XR_017709.1 | NAP1L6    |    |              | PREDICTED: Homo sapiens n  | 0.00795727 | 0.01671104 | 1.32606448 |
| DHRS7B    | NM_015510.3 | DHRS7B    | 17 | Homo sapiens | MGC8916; CG                | 7.33E-05   | 0.00046551 | 1.32534104 |
| OXR1      | NM_181354.3 | OXR1      | 8  | Homo sapiens | FLJ10125; FLJ              | 9.09E-06   | 0.00010424 | 1.32487223 |
| SAMD4B    | NM_018028.2 | SAMD4B    | 19 | Homo sapiens | FLJ10211; SM               | 0.02636264 | 0.04278173 | 1.32228323 |
| SLC12A2   | NM_001046.2 | SLC12A2   | 5  | Homo sapiens | NKCC1; BSC2                | 0.00021232 | 0.00100072 | 1.32225281 |
| LOC92659  | NR_015454.1 | LOC92659  | 17 | Homo sapiens | hypothetical L             | 0.00178842 | 0.00519276 | 1.31890986 |
| UGCGL2    | NM_020121.2 | UGCGL2    | 13 | Homo sapiens | MGC87276; Fl               | 0.00092131 | 0.00308752 | 1.31815403 |
| PTPRA     | NM_002836.2 | PTPRA     | 20 | Homo sapiens | HPTPalpha; RF              | 0.00065411 | 0.00237992 | 1.31603809 |
| PLK2      | NM_006622.1 | PLK2      | 5  | Homo sapiens | SNK                        | 0.02303493 | 0.03850256 | 1.31590728 |
| CBX4      | NM_003655.2 | CBX4      | 17 | Homo sapiens | NBP16; PC2; P              | 0.00054102 | 0.0020523  | 1.31519575 |
| FES       | NM_002005.2 | FES       | 15 | Homo sapiens | FPS                        | 0.00012118 | 0.0006618  | 1.31110329 |
| ABCD3     | NM_002858.2 | ABCD3     | 1  | Homo sapiens | ABC43; PXMP:               | 0.00990263 | 0.01993733 | 1.30749569 |
| ALG6      | NM_013339.2 | ALG6      | 1  | Homo sapiens | asparagine-lin             | 8.87E-05   | 0.00053408 | 1.30623955 |
| LOC283267 | NR_015451.1 | LOC283267 | 11 | Homo sapiens | hypothetical L             | 0.00241388 | 0.00653239 | 1.30485166 |
| MCFD2     | NM_139279.3 | MCFD2     | 2  | Homo sapiens | DKFZp686G21                | 0.00453867 | 0.01072543 | 1.30274514 |
| KIDINS220 | NM_020738.1 | KIDINS220 | 2  | Homo sapiens | ARMS; MGC16                | 0.00060161 | 0.00223992 | 1.3025845  |
| ZNF45     | NM_003425.2 | ZNF45     | 19 | Homo sapiens | XOX5; ZNF13                | 0.02628043 | 0.0427057  | 1.30246368 |
| CLCN3     | NM_001829.2 | CLCN3     | 4  | Homo sapiens | CIC-3; CLC3                | 0.00450244 | 0.01066068 | 1.29461919 |
| ELAVL1    | NM_001419.2 | ELAVL1    | 19 | Homo sapiens | MelG; HUR; El              | 0.00093667 | 0.00312262 | 1.29441868 |
| IDH3G     | NM_004135.2 | IDH3G     |    |              | Homo sapiens H-IDHG        | 0.0003824  | 0.00156829 | 1.29119558 |
| FOXO4     | NM_005938.1 | FOXO4     |    |              | Homo sapiens AFX1; AFX; FC | 0.01555959 | 0.02836799 | 1.29117693 |
| LOC648740 | NR_024438.2 | LOC648740 | 1  | Homo sapiens | ACTB pseudog               | 0.00397177 | 0.0096394  | 1.29094574 |
| PIK3C3    | NM_002647.2 | PIK3C3    | 18 | Homo sapiens | MGC61518; Vj               | 0.01126424 | 0.02206557 | 1.29049793 |
| MPHOSPH8  | NM_017520.2 | MPHOSPH8  | 13 | Homo sapiens | TWA3; FLJ352               | 0.00089097 | 0.00300158 | 1.29030663 |
| UBL3      | NM_007106.2 | UBL3      | 13 | Homo sapiens | DKFZP434K15                | 0.00508181 | 0.01172095 | 1.29017705 |
| POLR2J2   | NM_032959.4 | POLR2J2   | 7  | Homo sapiens | MGC54043; M                | 2.83E-05   | 0.00233887 | 1.28851789 |
| GCLC      | NM_001498.2 | GCLC      | 6  | Homo sapiens | GCS; GLCLC; I              | 0.01173596 | 0.02278021 | 1.28779545 |
| CHTF18    | NM_022092.1 | CHTF18    | 16 | Homo sapiens | Ctf18; C321D;              | 0.00066881 | 0.00241244 | 1.28771418 |
| OXSM      | NM_017897.1 | OXSM      | 3  | Homo sapiens | FLJ20604; FA               | 0.00135242 | 0.00417322 | 1.28647062 |
| QSOX1     | NM_002826.4 | QSOX1     | 1  | Homo sapiens | JQSCN6; FLJ34              | 0.00031155 | 0.0013399  | 1.28631058 |
| SERINC3   | NM_198941.1 | SERINC3   | 20 | Homo sapiens | TMS-1; TDE; S              | 0.00635637 | 0.01398684 | 1.28620917 |
| C12orf62  | NM_032901.2 | C12ORF62  | 12 | Homo sapiens | MGC14288                   | 0.00156017 | 0.00468524 | 1.28541508 |
| TUSC2     | NM_007275.1 | TUSC2     | 3  | Homo sapiens | FUS1; C3orf11              | 0.02352236 | 0.0391667  | 1.28463975 |
| GPC2      | NM_152742.1 | GPC2      | 7  | Homo sapiens | FLJ38962; DK               | 0.00538672 | 0.0122449  | 1.28411371 |
| SSR2      | NM_003145.2 | SSR2      | 1  | Homo sapiens | HSD25; DKFZJ               | 1.79E-05   | 0.00017075 | 1.28404394 |
| RAB8B     | NM_016530.2 | RAB8B     | 15 | Homo sapiens | FLJ38125                   | 0.0032107  | 0.00815467 | 1.28263652 |
| ANTXR1    | NM_032208.1 | ANTXR1    | 2  | Homo sapiens | ATR; FLJ2177               | 0.00132956 | 0.00411789 | 1.28099894 |
| DOPEY2    | NM_005128.2 | DOPEY2    | 21 | Homo sapiens | C21orf5                    | 0.01190359 | 0.02304797 | 1.28080618 |
| RIOK3     | NM_003831.2 | RIOK3     | 18 | Homo sapiens | DKFZp779L13                | 5.38E-05   | 0.0003767  | 1.28079073 |
| C7orf43   | NM_018275.3 | C7ORF43   | 7  | Homo sapiens | FLJ10925; DK               | 0.01028039 | 0.02052302 | 1.27957625 |
| RHBDF1    | NM_022450.2 | RHBDF1    | 16 | Homo sapiens | gene -90; gen              | 0.00019645 | 0.0009493  | 1.27702298 |
| GOLGA7    | NM_016099.2 | GOLGA7    | 8  | Homo sapiens | MGC4876; GO                | 0.00018245 | 0.00089846 | 1.27398774 |
| CRBN      | NM_016302.2 | CRBN      | 3  | Homo sapiens | MGC27358; D                | 0.01106401 | 0.02174781 | 1.27362982 |
| LOC641992 | XM_935770.1 | LOC641992 |    |              | PREDICTED: Homo sapiens s  | 0.01204746 | 0.02325196 | 1.27354055 |
| MYCBP2    | NM_015057.2 | MYCBP2    | 13 | Homo sapiens | FLJ21597; PAI              | 0.00474371 | 0.01110852 | 1.27285765 |
| INSIG2    | NM_016133.2 | INSIG2    | 2  | Homo sapiens | MGC26273                   | 0.00092604 | 0.00309666 | 1.27272611 |
| TSNAX     | NM_005999.2 | TSNAX     | 1  | Homo sapiens | TRAX                       | 0.00051281 | 0.00196446 | 1.26977985 |
| M160      | NM_174941.3 | M160      | 12 | Homo sapiens | CD163B                     | 0.00068772 | 0.00246917 | 1.26829943 |
| UFM1      | NM_016617.1 | UFM1      | 13 | Homo sapiens | bA131P10.1; C              | 0.00047166 | 0.00184323 | 1.26718461 |
| STAT1     | NM_139266.1 | STAT1     | 2  | Homo sapiens | ISGF-3; STAT               | 3.08E-05   | 0.00025363 | 1.26607674 |
| POLR3B    | NM_018082.3 | POLR3B    | 12 | Homo sapiens | PC2; FLJ103!               | 0.01366489 | 0.02561401 | 1.26490003 |
| FTSJ3     | NM_017647.2 | FTSJ3     | 17 | Homo sapiens | FLJ20062; EP               | 0.00533511 | 0.012153   | 1.2644231  |
| RIC8B     | NM_018157.1 | RIC8B     | 12 | Homo sapiens | hSyn; FLJ106!              | 0.01487264 | 0.02737271 | 1.26115194 |
| DLEU2     | XM_934422.1 | DLEU2     | 13 | Homo sapiens | MGC88287; II               | 0.00355318 | 0.00884672 | 1.26087136 |
| ASF1A     | NM_014034.1 | ASF1A     | 6  | Homo sapiens | DKFZP547E21                | 0.00163734 | 0.00485793 | 1.26052319 |

## 2.0 Upreg

|           |                       |                                |            |            |            |
|-----------|-----------------------|--------------------------------|------------|------------|------------|
| HTRA2     | NM_013247.4 HTRA2     | 2 Homo sapiens PARK13; OMI;    | 0.01373572 | 0.02572459 | 1.26030946 |
| TCTN3     | NM_015631.4 TCTN3     | Homo sapiens tectonic family   | 0.01086174 | 0.02143162 | 1.26006192 |
| DBT       | Hs.444093 DBT         | 1 Homo sapiens BCATE2; MGC'    | 0.00313193 | 0.00800136 | 1.25977202 |
| ACAA1     | NM_001607.2 ACAA1     | 3 Homo sapiens THIO; ACAA; I   | 0.0016103  | 0.00479736 | 1.25916673 |
| C2orf42   | NM_017880.1 C2ORF42   | 2 Homo sapiens FLJ20558        | 0.00951579 | 0.01930874 | 1.25862152 |
| ETS1      | NM_005238.2 ETS1      | 11 Homo sapiens FLJ10768; ET   | 0.00103378 | 0.003381   | 1.25740206 |
| MGC72104  | NM_207350.1 MGC72104  | 20 Homo sapiens similar to FRG | 0.00254417 | 0.00679864 | 1.25723815 |
| COQ10A    | NM_144576.2 COQ10A    | 12 Homo sapiens FLJ32452       | 0.00730584 | 0.01562375 | 1.254739   |
| FAM131A   | NM_144635.3 FAM131A   | 3 Homo sapiens MGC21688; Pf    | 0.00532861 | 0.01214075 | 1.25300072 |
| TMEM184C  | NM_018241.2 TMEM184C  | 4 Homo sapiens transmembrar    | 0.00831619 | 0.01734747 | 1.25287524 |
| MNAT1     | NM_002431.2 MNAT1     | 14 Homo sapiens MAT1; RNF66    | 0.00051241 | 0.00196432 | 1.25237434 |
| AFTPH     | NM_017657.3 AFTPH     | 2 Homo sapiens MGC33965; Fl    | 0.0086494  | 0.01788124 | 1.25197068 |
| USP9X     | NM_004652.3 USP9X     | Homo sapiens DFFRX; FAF        | 0.00199078 | 0.00562408 | 1.25149627 |
| SASH1     | NM_015278.3 SASH1     | 6 Homo sapiens RP3-323M4.1;    | 0.01712648 | 0.03052322 | 1.25144464 |
| EXTL2     | NM_00103302 EXTL2     | 1 Homo sapiens EXTR2           | 0.00347677 | 0.00869432 | 1.25124003 |
| FAM190B   | NM_018999.2 FAM190B   | 10 Homo sapiens FLJ14262; Gc   | 0.01744285 | 0.03092983 | 1.25102247 |
| SIL1      | NM_00103763 SIL1      | 5 Homo sapiens MSS; BAP; UL    | 0.01092833 | 0.02153956 | 1.24843522 |
| C14orf129 | NM_016472.3 C14ORF129 | 14 Homo sapiens HSPC210; GS    | 0.00037374 | 0.00154206 | 1.24767917 |
| UNC5A     | NM_133369.2 UNC5A     | 5 Homo sapiens UNC5H1; FLJ1    | 0.00439314 | 0.01043371 | 1.24682734 |
| SELK      | NM_021237.3 SELK      | 3 Homo sapiens HSPC297; MG     | 0.00077779 | 0.00270152 | 1.24681193 |
| C1orf52   | NM_198077.1 C1ORF52   | 1 Homo sapiens RP11-234D19.    | 0.00012208 | 0.00066435 | 1.24571612 |
| AFF4      | NM_014423.2 AFF4      | 5 Homo sapiens AF5Q31; MGC     | 0.016414   | 0.02958822 | 1.24500073 |
| ULK1      | XM_942125.1 ULK1      | PREDICTED: Homo sapiens u      | 0.0001555  | 0.0007938  | 1.24256291 |
| TRAPPC6B  | NM_00107953 TRAPPC6B  | 14 Homo sapiens trafficking PR | 0.00812754 | 0.01703242 | 1.24225374 |
| HIST1H2BK | NM_080593.1 HIST1H2BK | 6 Homo sapiens MGC131989; I    | 7.58E-06   | 9.24E-05   | 1.24197257 |
| LOC648399 | XM_926857.1 LOC648399 | PREDICTED: Homo sapiens s      | 0.00077875 | 0.00270399 | 1.24089433 |
| APAF1     | NM_181869.1 APAF1     | 12 Homo sapiens CED4; DKFZp    | 0.02046538 | 0.0350872  | 1.24089298 |
| SLC30A3   | NM_003459.4 SLC30A3   | 2 Homo sapiens ZNT3            | 2.88E-05   | 0.00024208 | 1.23975706 |
| KIAA0556  | NM_015202.1 KIAA0556  | 16 Homo sapiens KIAA0556 (KI   | 0.0097626  | 0.01970287 | 1.23949559 |
| PPP1R7    | NM_002712.1 PPP1R7    | 2 Homo sapiens SDS22           | 0.00607009 | 0.01349903 | 1.23816582 |
| PRKD2     | NM_016457.3 PRKD2     | 19 Homo sapiens HSPC187; PK    | 0.01613191 | 0.02920079 | 1.23807506 |
| FAM89B    | NM_152832.1 FAM89B    | 11 Homo sapiens MTR1           | 2.27E-05   | 0.00020414 | 1.23774616 |
| C3orf31   | NM_138807.2 C3ORF31   | 3 Homo sapiens MGC16471; D     | 0.01366253 | 0.025614   | 1.2370609  |
| AGGF1     | NM_018046.3 AGGF1     | 5 Homo sapiens VG5Q; FLJ102    | 0.01563817 | 0.0284826  | 1.23661217 |
| CPSF3L    | NM_017871.3 CPSF3L    | 1 Homo sapiens RC68; RC-68;    | 0.00144622 | 0.00441257 | 1.23614578 |
| CYB5R4    | NM_016230.2 CYB5R4    | 6 Homo sapiens RP4-676J13.1    | 0.01173131 | 0.02277932 | 1.23397328 |
| EIF4G3    | NM_003760.2 EIF4G3    | 1 Homo sapiens EIF4GII         | 0.0026132  | 0.0095234  | 1.2338019  |
| CENTG2    | NM_014914.2 CENTG2    | 2 Homo sapiens GGAP1; MGC7     | 7.35E-05   | 0.00046603 | 1.23310663 |
| PIGF      | NM_173074.1 PIGF      | 2 Homo sapiens MGC32646; M     | 0.0072506  | 0.01553007 | 1.23302203 |
| STYXL1    | NM_016086.2 STYXL1    | 7 Homo sapiens MK-STYX; DU     | 0.0010026  | 0.00329589 | 1.23301696 |
| TOM1      | NM_005488.1 TOM1      | 22 Homo sapiens FLJ33404       | 0.01903314 | 0.03313877 | 1.23228562 |
| MTF2      | NM_007358.1 MTF2      | 1 Homo sapiens dJ976O13.2; F   | 0.00851579 | 0.01765877 | 1.2317048  |
| KIAA0090  | NM_015047.1 KIAA0090  | 1 Homo sapiens RP1-43E13.1     | 0.00040059 | 0.0016257  | 1.23118971 |
| SCOC      | NM_032547.1 SCOC      | 4 Homo sapiens HRIHFB2072;     | 0.00027547 | 0.0012185  | 1.23094918 |
| PMAIP1    | NM_021127.1 PMAIP1    | 18 Homo sapiens APR; NOXA      | 0.0002953  | 0.00128167 | 1.23081721 |
| PURB      | NM_033224.3 PURB      | 7 Homo sapiens MGC126786; I    | 0.0005038  | 0.00194298 | 1.23056609 |
| AP4E1     | NM_007347.3 AP4E1     | 15 Homo sapiens DKFZp686L12    | 0.02260112 | 0.03793497 | 1.22982318 |
| BICD2     | NM_00100380 BICD2     | 9 Homo sapiens bA526D8.1; K    | 0.01281139 | 0.02438427 | 1.22884212 |
| GATAD2B   | NM_020699.1 GATAD2B   | 1 Homo sapiens MGC138285; I    | 0.00616449 | 0.01366144 | 1.22778438 |
| POLG2     | NM_007215.2 POLG2     | 17 Homo sapiens POLB; MTPOLF   | 0.01390647 | 0.02596383 | 1.22776418 |
| C12orf5   | NM_020375.1 C12ORF5   | 12 Homo sapiens TIGAR          | 0.01905643 | 0.03314746 | 1.22715164 |
| CRIP1     | NM_014171.3 CRIP1     | 2 Homo sapiens HSPC139         | 3.35E-05   | 0.00026884 | 1.22440226 |
| L2HGDH    | NM_024884.1 L2HGDH    | 14 Homo sapiens FLJ12618; C1   | 0.01453712 | 0.02691014 | 1.22420152 |
| RAB11FIP5 | NM_015470.1 RAB11FIP5 | 2 Homo sapiens RIP11; pp75;    | 0.00013916 | 0.00072884 | 1.22405215 |
| CAMSAP1L1 | NM_203459.1 CAMSAP1L1 | 1 Homo sapiens KIAA1078; MC    | 0.01726928 | 0.0307022  | 1.22338269 |
| ITGB3BP   | NM_014288.3 ITGB3BP   | 1 Homo sapiens HSU37139; Cf    | 0.01455062 | 0.02693055 | 1.22291936 |
| ACTR1B    | NM_005735.2 ACTR1B    | 2 Homo sapiens CTRN2; ARP1E    | 0.00023494 | 0.00108055 | 1.22216162 |
| LHPP      | NM_022126.2 LHPP      | 10 Homo sapiens MGC142189; I   | 3.02E-05   | 0.00024976 | 1.22086815 |
| SUPT4H1   | NM_003168.1 SUPT4H1   | 17 Homo sapiens SPT4H; SUPT4   | 8.44E-05   | 0.00051353 | 1.22022195 |
| UTP14C    | NM_021645.4 UTP14C    | 13 Homo sapiens UTP14B; KIAA   | 0.00402257 | 0.0097236  | 1.21902501 |
| TM2D1     | NM_032027.2 TM2D1     | 1 Homo sapiens BBP             | 0.00010831 | 0.00061114 | 1.21887847 |
| VPS25     | NM_032353.2 VPS25     | 17 Homo sapiens MGC10540; F/   | 0.00787112 | 0.01657817 | 1.21887788 |
| LMF2      | NM_033200.1 LMF2      | 22 Homo sapiens TMEM153; TM    | 0.00395428 | 0.00961412 | 1.21716964 |
|           | Hs.542428 HS.542428   | 20 xc76e10.x1 NCI_CGAP_Ov32    | 0.02015988 | 0.03465637 | 1.21666699 |
| ANKRD54   | NM_138797.1 ANKRD54   | 22 Homo sapiens ankyrin repeat | 0.00637284 | 0.01401174 | 1.21654377 |
| VRK1      | NM_003384.2 VRK1      | 14 Homo sapiens MGC142070; I   | 0.00064994 | 0.00236874 | 1.21619508 |
| TNFAIP8L1 | NM_152362.1 TNFAIP8L1 | 19 Homo sapiens MGC17791       | 0.02748033 | 0.04411465 | 1.21569741 |
| ACN9      | NM_020186.1 ACN9      | 7 Homo sapiens DC11            | 7.99E-05   | 0.00049449 | 1.21533822 |
| MFF       | NM_020194.4 MFF       | 2 Homo sapiens MGC110913; C    | 0.00193134 | 0.00549471 | 1.21431507 |
| C1orf122  | NM_198446.1 C1ORF122  | 1 Homo sapiens ALAESM; FLJ4    | 0.00104605 | 0.00341088 | 1.21219888 |



2.0 Upreg

|             |                         |                                 |            |            |            |
|-------------|-------------------------|---------------------------------|------------|------------|------------|
| WRB         | NM_004627.2 WRB         | 21 Homo sapiens CHD5            | 0.00106179 | 0.00345185 | 1.21105418 |
| PGM3        | NM_015599.1 PGM3        | 6 Homo sapiens AGM1; PAGM;      | 0.00301733 | 0.00778175 | 1.21089348 |
| GPAM        | NM_020918.2 GPAM        | 10 Homo sapiens GPAT1; MGC2     | 0.00322846 | 0.00819405 | 1.21087972 |
| NKIRAS1     | NM_020345.3 NKIRAS1     | 3 Homo sapiens KBRAS1; kapp     | 0.00013038 | 0.00069701 | 1.21073002 |
| KIAA0913    | NM_015037.1 KIAA0913    | 10 Homo sapiens FLJ34302        | 0.00012438 | 0.00067287 | 1.21019469 |
| TUBG2       | NM_016437.1 TUBG2       | 17 Homo sapiens MGC131994       | 0.01131032 | 0.02212394 | 1.20781777 |
| BRD7P2      | XR_039198.1 BRD7P2      | PREDICTED: Homo sapiens n       | 0.00283418 | 0.00740428 | 1.20750486 |
| NANS        | NM_018946.2 NANS        | 9 Homo sapiens SAS              | 0.00120322 | 0.00380688 | 1.20650896 |
| TRIM66      | NM_014818.1 TRIM66      | 11 Homo sapiens tripartite moti | 0.02198833 | 0.03711854 | 1.20609079 |
| MEF2D       | NM_005920.2 MEF2D       | 1 Homo sapiens DKFZp686I15.     | 0.00071854 | 0.00255618 | 1.20601636 |
| ZNF557      | NM_00104438 ZNF557      | 19 Homo sapiens MGC4054         | 0.0255454  | 0.04177361 | 1.20553767 |
| LOC552889   | NM_00113626 LOC552889   | 12 Homo sapiens hypothetical p  | 0.0087303  | 0.01801079 | 1.20536037 |
| C14orf142   | NM_032490.3 C14ORF142   | 14 Homo sapiens MGC133207; I    | 0.0316102  | 0.04897215 | 1.20459373 |
| STT3B       | NM_178862.1 STT3B       | 3 Homo sapiens STT3-B; SIMP     | 0.01867032 | 0.03261154 | 1.20406478 |
| CABC1       | NM_020247.3 CABC1       | 1 Homo sapiens MGC4849; CO      | 0.00037434 | 0.00154337 | 1.20396387 |
| CCNC        | NM_00101339 CCNC        | 6 Homo sapiens CyoC             | 0.00010342 | 0.00059282 | 1.20375961 |
| LOC93622    | NM_138699.2 LOC93622    | PREDICTED: Homo sapiens h       | 0.00577345 | 0.01295598 | 1.20218623 |
| LRRCS8      | NM_00109967 LRRCS8      | 3 Homo sapiens leucine rich re  | 0.00212474 | 0.00590277 | 1.20181585 |
| BIK         | NM_001197.3 BIK         | 22 Homo sapiens NBK; BIP1; BF   | 0.00323836 | 0.00820766 | 1.20050287 |
| RNF216      | NM_019011.4 RNF216      | 7 Homo sapiens ZIN; UBCE7IP     | 0.00707234 | 0.01522928 | 1.20045896 |
| CD46        | NM_172358.1 CD46        | 1 Homo sapiens TLX; MCP; TR/    | 0.00727034 | 0.015557   | 1.19911108 |
|             | Hs.279842 HS.279842     | 1 Homo sapiens HSPC157 prot     | 0.00744264 | 0.01586012 | 1.19890606 |
| TMEM9       | NM_016456.2 TMEM9       | 1 Homo sapiens TMEM9A           | 0.00126846 | 0.00396938 | 1.19831834 |
| CBARA1      | NM_006077.1 CBARA1      | 10 Homo sapiens CALC; EFHA3;    | 0.02127175 | 0.03621262 | 1.19828135 |
| PPHLN1      | NM_201438.1 PPHLN1      | 12 Homo sapiens HSPC206; HSP    | 0.00205984 | 0.00577264 | 1.19796644 |
| AKAP11      | NM_016248.2 AKAP11      | 13 Homo sapiens PRKA11; AKAF    | 0.009013   | 0.01847827 | 1.19442176 |
| LRRC1       | NM_025168.1 LRRC1       | 6 Homo sapiens dJ523E19.1; L    | 0.01081521 | 0.02136308 | 1.19421132 |
| FAM188A     | NM_024948.2 FAM188A     | 10 Homo sapiens DERP5; MST1.    | 0.00013369 | 0.00070805 | 1.19333884 |
| TMEM42      | NM_144638.1 TMEM42      | 3 Homo sapiens MGC29956         | 0.02469221 | 0.04067216 | 1.19257532 |
| ACAD8       | NM_014384.1 ACAD8       | 11 Homo sapiens ACAD-8          | 0.01218251 | 0.02344184 | 1.19255651 |
| SDCBP       | NM_00100706 SDCBP       | 8 Homo sapiens MDA-9; SYCL;     | 0.00087629 | 0.00296498 | 1.19150824 |
| C4orf34     | NM_174921.1 C4ORF34     | 4 Homo sapiens FLJ13289         | 3.31E-05   | 0.00026687 | 1.19116468 |
| MRPL10      | NM_145255.2 MRPL10      | 17 Homo sapiens MGC17973; RI    | 0.00093325 | 0.003116   | 1.1897294  |
| UBE4A       | NM_004788.2 UBE4A       | 11 Homo sapiens UFD2; KIAA01    | 0.00010728 | 0.00060817 | 1.18963545 |
| CORO1B      | NM_020441.2 CORO1B      | 11 Homo sapiens CORONIN-2; I    | 0.00497667 | 0.01152983 | 1.18939474 |
| ASB1        | NM_016114.3 ASB1        | 2 Homo sapiens MGC11165; KI     | 0.00725315 | 0.01553245 | 1.1883512  |
| WBP1        | NM_012477.2 WBP1        | 2 Homo sapiens MGC15305; W      | 0.00830248 | 0.0173222  | 1.18825215 |
| CCDC84      | NM_198489.1 CCDC84      | 11 Homo sapiens DLNB14          | 0.00117394 | 0.00374147 | 1.18821543 |
| DFFA        | NM_004401.2 DFFA        | 1 Homo sapiens DFF-45; ICAD     | 0.00124554 | 0.00390552 | 1.18801058 |
| OSBPL2      | NM_144498.1 OSBPL2      | 20 Homo sapiens MGC4307; KIA    | 0.02370659 | 0.03941306 | 1.18729383 |
| FAM53C      | NM_016605.1 FAM53C      | 5 Homo sapiens C5orf6           | 0.00011312 | 0.00062949 | 1.18566566 |
| HERPUD1     | NM_00101099 HERPUD1     | 16 Homo sapiens Mif1; SUP; HE   | 0.00011931 | 0.00065456 | 1.18559429 |
| LOC728602   | XR_039532.1 LOC728602   | PREDICTED: Homo sapiens n       | 0.00966072 | 0.01954443 | 1.18482355 |
| LOC10013453 | XR_039501.1 LOC10013453 | 7 PREDICTED: Homo sapiens n     | 5.95E-05   | 0.000401   | 1.18458512 |
| C14orf109   | NM_015676.1 C14ORF109   | 14 Homo sapiens DKFZP564F11     | 0.00235261 | 0.00639844 | 1.18436702 |
| CCNH        | NM_001239.2 CCNH        | 5 Homo sapiens p34; CAK; p3;    | 0.01515628 | 0.02776309 | 1.18313387 |
| GMPPA       | NM_013335.2 GMPPA       | 2 Homo sapiens GDP-mannose      | 0.00044817 | 0.00177115 | 1.18290622 |
| HDHD1A      | NM_012080.3 HDHD1A      | Homo sapiens DXF68S1E; GS       | 0.02235107 | 0.03762569 | 1.18288009 |
| LOC650832   | XM_939919.1 LOC650832   | PREDICTED: Homo sapiens s       | 0.01108017 | 0.02177564 | 1.18230806 |
| C5orf37     | NM_152408.1 C5ORF37     | 5 Homo sapiens MGC120443; I     | 0.00191425 | 0.00545752 | 1.18224607 |
| RNF167      | NM_015528.1 RNF167      | 17 Homo sapiens 5730408C10R     | 0.00631673 | 0.01391654 | 1.18165266 |
| HOXA10      | NM_018951.2 HOXA10      | 7 Homo sapiens MGC12859; PI     | 0.01534188 | 0.02806051 | 1.18086959 |
| EIF2B3      | NM_020365.2 EIF2B3      | 1 Homo sapiens EIF-2B; EIF2B    | 0.01896648 | 0.03303858 | 1.18013662 |
| STAG3L2     | NM_00101373 STAG3L2     | 7 Homo sapiens MGC131759        | 0.00391417 | 0.0095358  | 1.17951366 |
| GOLGA8B     | NM_00102356 GOLGA8B     | Homo sapiens KIAA0855; GC       | 0.00037389 | 0.00154211 | 1.1790267  |
| UNC45A      | NM_017979.1 UNC45A      | 15 Homo sapiens FLJ10043; SM    | 0.00762746 | 0.01617784 | 1.17841427 |
| REEP6       | NM_138393.1 REEP6       | 19 Homo sapiens FLJ25383; DP    | 0.00067045 | 0.00241672 | 1.17753753 |
| ARIH1       | NM_005744.2 ARIH1       | 15 Homo sapiens ARI; HHARI; L   | 0.01948829 | 0.03376356 | 1.17749667 |
| KLHL9       | NM_018847.1 KLHL9       | 9 Homo sapiens RP11-380P16.     | 0.00074366 | 0.00262235 | 1.17660932 |
| LOC10013410 | XM_00171397 LOC10013410 | PREDICTED: Homo sapiens s       | 0.00257542 | 0.00686694 | 1.17644559 |
| AKTIP       | NM_022476.2 AKTIP       | 16 Homo sapiens FTS; FT1        | 0.00028818 | 0.00126032 | 1.17613152 |
| COG2        | NM_007357.1 COG2        | 1 Homo sapiens LDLC             | 0.02530419 | 0.04145402 | 1.17554682 |
| PROCR       | NM_006404.3 PROCR       | 20 Homo sapiens CCA; EPCR; I    | 0.00951212 | 0.01930489 | 1.17470002 |
| C4orf27     | NM_017867.1 C4ORF27     | 4 Homo sapiens FLJ20534         | 0.00306322 | 0.00786093 | 1.17464049 |
| CMC1        | NM_182523.1 CMC1        | 3 Homo sapiens DKFZp779D08      | 0.00686357 | 0.0148978  | 1.17436425 |
| C1orf63     | NM_207035.1 C1ORF63     | 1 Homo sapiens RP3-465N24.4     | 0.00380845 | 0.00933475 | 1.17380433 |
| LOC10013178 | XR_039574.1 LOC10013178 | 7 PREDICTED: Homo sapiens n     | 0.01168918 | 0.02272594 | 1.1737666  |
| SPTAN1      | NM_003127.1 SPTAN1      | 9 Homo sapiens FLJ44613; (AL    | 0.00398965 | 0.00966983 | 1.17313397 |
| RAB11FIP2   | NM_014904.1 RAB11FIP2   | 10 Homo sapiens Rab11-FIP2; k   | 0.00781428 | 0.01648721 | 1.17300115 |
| ZWINT       | NM_00100541 ZWINT       | 10 Homo sapiens MGC117174; l    | 0.01711211 | 0.0305026  | 1.17124129 |

2.0 Upreg

|           |             |           |                                 |            |            |            |
|-----------|-------------|-----------|---------------------------------|------------|------------|------------|
| PIP4K2A   | NM_005028.4 | PIP4K2A   | 10 Homo sapiens PIP5KII-alpha   | 4.33E-06   | 6.30E-05   | 1.17102948 |
| C5orf21   | NM_032042.3 | C5ORF21   | 5 Homo sapiens DKFZP564D17      | 0.00536842 | 0.01221351 | 1.16988943 |
| HSF2      | NM_004506.2 | HSF2      | 6 Homo sapiens MGC117376; I     | 0.02065071 | 0.03533248 | 1.16988861 |
| C2orf44   | NM_025203.1 | C2ORF44   | 2 Homo sapiens FLJ21945; PP:    | 0.00062995 | 0.00230903 | 1.16981835 |
| ZSWIM7    | NM_00104269 | ZSWIM7    | 17 Homo sapiens SWS1            | 0.0231275  | 0.03863946 | 1.16939972 |
| DNAJB2    | NM_006736.5 | DNAJB2    | 2 Homo sapiens HSPF3; HSJ1      | 0.00419082 | 0.01004319 | 1.16861699 |
| MYO9B     | NM_004145.2 | MYO9B     | 19 Homo sapiens MYR5; CELIAC    | 0.00834019 | 0.01738085 | 1.16786972 |
| THOC2     | NM_020449.1 | THOC2     | Homo sapiens CXorf3; dJ506      | 0.00565066 | 0.01272247 | 1.16774386 |
| LOC648852 | XM_940430.1 | LOC648852 | PREDICTED: Homo sapiens h       | 0.00527142 | 0.01204327 | 1.1677301  |
| SPNS1     | NM_032038.1 | SPNS1     | 16 Homo sapiens SPINL; FLJ383   | 0.00312999 | 0.00799829 | 1.16728478 |
| GDF15     | NM_004864.1 | GDF15     | 19 Homo sapiens PTGFB; GDF-1    | 9.77E-06   | 0.0001096  | 1.16702898 |
| DGKQ      | NM_001347.2 | DGKQ      | 4 Homo sapiens DAGK7; DAGK      | 0.00052997 | 0.00202023 | 1.16560771 |
| SDSL      | NM_138432.2 | SDSL      | 12 Homo sapiens SDS-RS1         | 0.00713531 | 0.01534056 | 1.16503945 |
| PMM1      | NM_002676.1 | PMM1      | 22 Homo sapiens Sec53           | 0.0013362  | 0.00413492 | 1.16450647 |
| HDAC3     | NM_003883.2 | HDAC3     | 5 Homo sapiens RPD3; HD3; R     | 4.78E-05   | 0.00034785 | 1.16390005 |
| BIRC2     | NM_001166.3 | BIRC2     | 11 Homo sapiens MYR3; Hiap-2;   | 0.00671295 | 0.01464106 | 1.16369584 |
| ARPC4     | NM_005718.3 | ARPC4     | 3 Homo sapiens ARC20; p20-A     | 0.0011881  | 0.0037711  | 1.16329368 |
| GLRX      | NM_002064.1 | GLRX      | 5 Homo sapiens GRX; GRX1; M     | 4.13E-05   | 0.00031442 | 1.16280169 |
| SLC30A7   | NM_133496.3 | SLC30A7   | 1 Homo sapiens ZnT-7; ZNT7;     | 0.00152307 | 0.00459671 | 1.16277682 |
| ENO2      | NM_001975.2 | ENO2      | 12 Homo sapiens NSE             | 7.66E-05   | 0.00048009 | 1.16209643 |
| LMO4      | NM_006769.2 | LMO4      | 1 Homo sapiens LIM domain or    | 0.00021249 | 0.00100581 | 1.16194977 |
| PDCD6IP   | NM_013374.3 | PDCD6IP   | 3 Homo sapiens MGC17003; Al     | 0.02501141 | 0.04107964 | 1.16194584 |
| LOC728153 | XM_926814.1 | LOC728153 | 5 PREDICTED: Homo sapiens s     | 0.03109321 | 0.04838502 | 1.16186007 |
| KLHDC5    | NM_020782.1 | KLHDC5    | 12 Homo sapiens MGC131714; I    | 0.00073056 | 0.00258707 | 1.16179293 |
| PIGM      | NM_145167.1 | PIGM      | 1 Homo sapiens MGC29896         | 0.01540947 | 0.02815096 | 1.16105883 |
| MCL1      | NM_021960.3 | MCL1      | 1 Homo sapiens MCL1L; MGC1      | 0.00333678 | 0.00839835 | 1.16005817 |
| KIAA1751  | XM_933934.1 | KIAA1751  | 1 PREDICTED: Homo sapiens K     | 0.00720957 | 0.01545437 | 1.15974143 |
| LMAN2L    | NM_030805.1 | LMAN2L    | 2 Homo sapiens MGC11139; V      | 0.0004743  | 0.00185022 | 1.15948859 |
| PGS1      | NM_024419.3 | PGS1      | 17 Homo sapiens DKFZP762M1E     | 0.00051747 | 0.00197813 | 1.15948743 |
| UCHL3     | NM_006002.3 | UCHL3     | 13 Homo sapiens UCH-L3          | 0.00074866 | 0.00263316 | 1.15912552 |
| ARL1      | NM_001177.3 | ARL1      | 12 Homo sapiens ARFL1           | 0.00199204 | 0.00562618 | 1.15887767 |
| TSPYL1    | NM_003309.1 | TSPYL1    | 6 Homo sapiens TSPYL            | 0.0001236  | 0.00066964 | 1.15861277 |
| HELZ      | NM_014877.2 | HELZ      | 17 Homo sapiens FLJ2p586G19     | 0.0292227  | 0.04622886 | 1.15698895 |
| EXOC2     | NM_018303.4 | EXOC2     | 6 Homo sapiens Sec5p; FLJ110    | 0.02479681 | 0.04081972 | 1.15679241 |
| DCAF7     | NM_005828.2 | DCAF7     | 17 Homo sapiens AN11; HAN11     | 6.51E-05   | 0.00042972 | 1.15647822 |
| SLC39A3   | NM_213568.1 | SLC39A3   | 19 Homo sapiens ZIP3            | 0.00625509 | 0.01381153 | 1.15592778 |
| EAPP      | NM_018453.3 | EAPP      | 14 Homo sapiens FLJ20578; MG    | 0.00082392 | 0.0028265  | 1.15555705 |
| KATNA1    | NM_007044.2 | KATNA1    | 6 Homo sapiens katanin p60 (/   | 0.01263736 | 0.02413334 | 1.15502362 |
|           | Hs.497591   | HS.497591 | 14 Homo sapiens cDNA FLJ4184    | 0.01480396 | 0.02727402 | 1.15497054 |
| PEA15     | NM_003768.2 | PEA15     | 1 Homo sapiens HUMMAT1H; P      | 0.00014468 | 0.00075379 | 1.15331249 |
| HNRNPH2   | NM_00103239 | HNRNPH2   | Homo sapiens HNRPH1; FTP3       | 0.01767617 | 0.03125178 | 1.1528432  |
| MRPS31    | NM_005830.2 | MRPS31    | 13 Homo sapiens MRP-S31; IMC    | 0.0024057  | 0.00651349 | 1.15273165 |
| MFAP1     | NM_005926.2 | MFAP1     | 15 Homo sapiens microfibrillar- | 0.00400213 | 0.00968495 | 1.15260919 |
| SLC4A5    | NM_133478.2 | SLC4A5    | 2 Homo sapiens NBC4; MGC12      | 0.0202179  | 0.03473963 | 1.15149891 |
| MKRN2     | NM_014160.3 | MKRN2     | 3 Homo sapiens HSPC070; RNF     | 0.00213035 | 0.00591383 | 1.15052773 |
| UNC84A    | NM_025154.2 | UNC84A    | 7 Homo sapiens KIAA0810; SU     | 0.00116541 | 0.00372302 | 1.14994461 |
| BTG1      | NM_001731.1 | BTG1      | 12 Homo sapiens B-cell transloc | 9.30E-05   | 0.00054938 | 1.14955056 |
| STX2      | NM_001980.2 | STX2      | 12 Homo sapiens MGC51014; S'    | 0.00266091 | 0.00705337 | 1.14937154 |
| HRASLS3   | NM_007069.1 | HRASLS3   | 11 Homo sapiens HREV107-3; H    | 0.01009166 | 0.02022799 | 1.14917307 |
| PRKCSH    | NM_00100132 | PRKCSH    | 19 Homo sapiens G19P1; AGE-R    | 0.00118741 | 0.00377112 | 1.14858168 |
| KATNB1    | NM_005886.1 | KATNB1    | 16 Homo sapiens KAT             | 0.00214634 | 0.00595214 | 1.1468054  |
| BRP44     | NM_015415.1 | BRP44     | 1 Homo sapiens MGC125752; I     | 0.00109308 | 0.00353559 | 1.14639231 |
| CDC7      | NM_003503.2 | CDC7      | 1 Homo sapiens HsCDC7; MGC      | 0.0007237  | 0.00257033 | 1.1463311  |
| KBTBD11   | NM_014867.1 | KBTBD11   | 8 Homo sapiens KIAA0711; KL     | 0.01043328 | 0.0207558  | 1.14583397 |
| STX5      | NM_003164.2 | STX5      | 11 Homo sapiens STX5A; SED5     | 0.00185735 | 0.00533448 | 1.14559975 |
| DBNL      | NM_014063.5 | DBNL      | 7 Homo sapiens SH3P7; HIP-5'    | 0.00019091 | 0.00092789 | 1.14539488 |
| WDR33     | NM_00100662 | WDR33     | 2 Homo sapiens WDC146; FLJ1     | 0.02239664 | 0.03769072 | 1.14521597 |
| LOC730432 | XM_936257.1 | LOC730432 | PREDICTED: Homo sapiens s       | 0.00045664 | 0.00179681 | 1.1448213  |
| STX6      | NM_005819.4 | STX6      | 1 Homo sapiens syntaxin 6 (ST   | 0.00493091 | 0.01145312 | 1.14480629 |
| LOC646567 | XM_940087.1 | LOC646567 | 1 PREDICTED: Homo sapiens s     | 0.00045162 | 0.0017822  | 1.14462999 |
| C2orf30   | NM_015701.2 | C2ORF30   | 2 Homo sapiens CL24936; CL2     | 0.00545589 | 0.01237109 | 1.14460379 |
| HSD17B10  | NM_004493.2 | HSD17B10  | Homo sapiens HCD2; ABAD;        | 0.01148923 | 0.02429948 | 1.14393676 |
| YIPF3     | NM_015388.2 | YIPF3     | 6 Homo sapiens FinGER3; dJ33    | 0.00037497 | 0.0015454  | 1.14319436 |
| SH3GL1    | NM_003025.2 | SH3GL1    | 19 Homo sapiens SH3P8; MGC1     | 0.03008467 | 0.04719403 | 1.14290009 |
| RNF123    | NM_022064.2 | RNF123    | 3 Homo sapiens KPC1; DKFZp6     | 0.00461997 | 0.01087029 | 1.14250306 |
| CCDC45    | NM_138363.1 | CCDC45    | 17 Homo sapiens DKFZp667E18     | 0.00651707 | 0.01428549 | 1.14187043 |
| LOC642333 | XM_939884.1 | LOC642333 | PREDICTED: Homo sapiens s       | 0.0061304  | 0.01359421 | 1.14122899 |
| ZNF526    | NM_133444.1 | ZNF526    | 19 Homo sapiens KIAA1951; M     | 0.02993254 | 0.04702326 | 1.14116704 |
| DPM1      | NM_003859.1 | DPM1      | 20 Homo sapiens MPDS; CDG1E     | 3.01E-05   | 0.00024969 | 1.14115909 |
| CHEK2     | NM_007194.3 | CHEK2     | 22 Homo sapiens HuCds1; CHK2    | 0.030648   | 0.04787042 | 1.14094938 |

2.0 Upreg

|             |                         |    |                                 |            |            |            |
|-------------|-------------------------|----|---------------------------------|------------|------------|------------|
| ATP6V1A     | NM_001690.2 ATP6V1A     |    | 3 Homo sapiens VA68; Vma1;      | 0.000133   | 0.00070682 | 1.1406916  |
|             | Hs.579631 HS.579631     |    | 19 AGENCOURT_10229596 NIH_      | 9.43E-05   | 0.00055566 | 1.14067797 |
| FLJ40722    | XM_945696.1 FLJ40722    |    | PREDICTED: Homo sapiens h       | 0.020848   | 0.03562517 | 1.14064692 |
| TMEM55B     | NM_144568.1 TMEM55B     |    | 14 Homo sapiens DKFZp434M05     | 0.00864809 | 0.01788194 | 1.1397438  |
| COPE        | NM_199444.1 COPE        |    | 19 Homo sapiens FLJ13241; eps   | 0.0001186  | 0.00065162 | 1.13933747 |
| EAF1        | NM_033083.5 EAF1        |    | 3 Homo sapiens ELL associatec   | 0.00866802 | 0.01791633 | 1.13886453 |
| RNF31       | NM_017999.3 RNF31       |    | 14 Homo sapiens FLJ23501; MG    | 0.02196127 | 0.03708438 | 1.13837305 |
| LOC644310   | XM_927480.1 LOC644310   |    | PREDICTED: Homo sapiens s       | 0.00833981 | 0.0173834  | 1.13817534 |
| ITGAV       | NM_002210.2 ITGAV       |    | 2 Homo sapiens CD51; DKFZp      | 0.0056591  | 0.0127362  | 1.1379286  |
| MAGEB6B     | XM_373340.1 MAGEB6B     | X  | PREDICTED: Homo sapiens n       | 0.00332732 | 0.00837649 | 1.13767304 |
| SWAP70      | NM_015055.1 SWAP70      |    | 11 Homo sapiens HSPC321; FLJ    | 0.00778587 | 0.01644962 | 1.13706968 |
| MRPS33      | NM_016071.2 MRPS33      |    | 7 Homo sapiens FLJ21123; CG     | 0.00158753 | 0.00474381 | 1.13688817 |
| GGCT        | NM_024051.2 GGCT        |    | 7 Homo sapiens FLJ11717; MG     | 0.00037661 | 0.00155038 | 1.13618368 |
| LOC10013366 | XM_00171361 LOC10013366 |    | PREDICTED: Homo sapiens h       | 0.00495498 | 0.0114992  | 1.13596075 |
| C2orf56     | NM_144736.3 C2ORF56     |    | 2 Homo sapiens PRO1853          | 0.03137067 | 0.04868434 | 1.13557216 |
| ZSWIM1      | NM_080603.3 ZSWIM1      |    | 20 Homo sapiens C2orf162        | 0.01743213 | 0.03092091 | 1.13504236 |
| ITM2B       | NM_021999.2 ITM2B       |    | 13 Homo sapiens E3-16; BRICD    | 0.00018229 | 0.00089845 | 1.13502726 |
| HSPC171     | NM_014187.1 HSPC171     |    | Homo sapiens HSPC171 prot:      | 0.00417101 | 0.01000453 | 1.13460347 |
| BCDIN3D     | NM_181708.1 BCDIN3D     |    | 12 Homo sapiens BCDIN3 doma     | 0.02067029 | 0.03535485 | 1.13451092 |
| C19orf60    | NM_00110041 C19ORF60    |    | 19 Homo sapiens FLJ20850; FLJ   | 0.00077554 | 0.00269456 | 1.13436751 |
| NECAP1      | NM_015509.2 NECAP1      |    | 12 Homo sapiens DKFZP566B18     | 0.00032286 | 0.00137817 | 1.13399284 |
| C14orf179   | NM_052873.1 C14ORF179   |    | 14 Homo sapiens FLJ32173; MG    | 0.02687092 | 0.04336697 | 1.13353863 |
| PGRMC2      | NM_006320.1 PGRMC2      |    | 4 Homo sapiens DG6; PMBP        | 0.00137879 | 0.00424016 | 1.13326139 |
| C6orf173    | NM_00101250 C6ORF173    |    | 6 Homo sapiens DKFZp686L15      | 0.00111667 | 0.00359479 | 1.13323736 |
| OCEL1       | NM_024578.1 OCEL1       |    | 19 Homo sapiens S863-9; FLJ22   | 0.00716728 | 0.01538798 | 1.13322298 |
| RNF126      | NM_194460.1 RNF126      |    | 19 Homo sapiens MGC14317; M     | 0.01737062 | 0.03083697 | 1.1324994  |
| SYAP1       | NM_032796.2 SYAP1       | X  | Homo sapiens FLJ14495; DK       | 0.00844188 | 0.01754568 | 1.13241402 |
| AP3D1       | NM_003938.4 AP3D1       |    | 19 Homo sapiens hBLVR; ADTD     | 0.00837004 | 0.01742302 | 1.13143856 |
| CLPTM1      | NM_001294.1 CLPTM1      |    | 19 Homo sapiens cleft lip and p | 0.00023102 | 0.00106932 | 1.13106664 |
| LOC728499   | XM_928299.1 LOC728499   |    | 5 PREDICTED: Homo sapiens s     | 0.01015659 | 0.02033938 | 1.13066744 |
| C7orf26     | NM_024067.2 C7ORF26     |    | 7 Homo sapiens MGC2718          | 0.00303981 | 0.00781933 | 1.12978727 |
| DENND5A     | NM_015213.2 DENND5A     |    | 11 Homo sapiens FLJ33829; FLJ   | 0.00487405 | 0.01136477 | 1.12973168 |
| MCOLN2      | NM_153259.2 MCOLN2      |    | 1 Homo sapiens TRP-ML2; TRP     | 0.00580226 | 0.01300454 | 1.12971389 |
| AP1G1       | NM_001128.5 AP1G1       |    | 16 Homo sapiens MGC18255; AI    | 0.03017171 | 0.04730326 | 1.12848151 |
| PSMC4       | NM_006503.2 PSMC4       |    | 19 Homo sapiens MIP224; MGC     | 0.00463527 | 0.01089684 | 1.1282691  |
| UBLCP1      | NM_145049.1 UBLCP1      |    | 5 Homo sapiens MGC10067; FI     | 0.00522212 | 0.01196585 | 1.12826749 |
| DCP2        | NM_152624.4 DCP2        |    | 5 Homo sapiens NUDT20; FLJ3     | 0.00049207 | 0.00190584 | 1.12720645 |
| TMEM118     | NM_032814.1 TMEM118     |    | Homo sapiens FLJ14627           | 0.00187348 | 0.00536803 | 1.12700892 |
|             | Hs.545976 HS.545976     | X  | xm52h06.x1 NCI_CGAP_GC6         | 0.02316693 | 0.03869938 | 1.12579133 |
| PI4K2B      | NM_018323.2 PI4K2B      |    | 4 Homo sapiens FLJ11105; PIK    | 0.03140908 | 0.04873003 | 1.125045   |
| NDFIP2      | NM_019080.1 NDFIP2      |    | 13 Homo sapiens FLJ25842; N4    | 0.00021686 | 0.00102072 | 1.12495081 |
| LRPAP1      | NM_002337.1 LRPAP1      |    | 4 Homo sapiens MGC138272; J     | 0.00307918 | 0.00788886 | 1.12452443 |
| CHSY1       | NM_014918.3 CHSY1       |    | 15 Homo sapiens CSS1; KIAA09    | 0.00028745 | 0.00125816 | 1.1237411  |
| RTN4IP1     | NM_032730.3 RTN4IP1     |    | 6 Homo sapiens NIMP; MGC12'     | 0.01295023 | 0.02457965 | 1.12365814 |
| OAT         | NM_000274.1 OAT         |    | 10 Homo sapiens HOGA; DKFZp     | 0.0001154  | 0.00063985 | 1.12331909 |
| LOC646966   | XR_038853.1 LOC646966   |    | PREDICTED: Homo sapiens n       | 0.00902166 | 0.01848557 | 1.12301604 |
| TMEM60      | NM_032936.2 TMEM60      |    | 7 Homo sapiens MGC74482; C      | 0.00117242 | 0.0037399  | 1.12259113 |
| SPPL2A      | NM_032802.2 SPPL2A      |    | 15 Homo sapiens PSL2; IMP3      | 0.00245873 | 0.00663065 | 1.12231602 |
| FRG1        | NM_004477.2 FRG1        |    | 4 Homo sapiens FSG1; FRG1A      | 0.00197031 | 0.00557784 | 1.12192969 |
| PLRG1       | NM_002669.2 PLRG1       |    | 4 Homo sapiens MGC110980; I     | 0.00030114 | 0.00130235 | 1.12159953 |
| CAPRIN2     | NM_023925.3 CAPRIN2     |    | 12 Homo sapiens MGC134848; I    | 0.0247597  | 0.04077098 | 1.12157366 |
| SRP54       | NM_003136.2 SRP54       |    | 14 Homo sapiens signal recognit | 0.00024593 | 0.00111691 | 1.12013989 |
| M6PR        | NM_002355.2 M6PR        |    | 12 Homo sapiens SMPR; FLJ329    | 0.00960744 | 0.019462   | 1.11903697 |
| ACTR1A      | NM_005736.2 ACTR1A      |    | 10 Homo sapiens ARP1            | 0.00149611 | 0.00453676 | 1.1189017  |
| SIVA        | NM_006427.2 SIVA        |    | 14 Homo sapiens CD27BP          | 3.18E-05   | 0.00025936 | 1.11847663 |
| VAMP7       | NM_005638.3 VAMP7       | XY | Homo sapiens TI-VAMP; VAM       | 0.00934033 | 0.01902017 | 1.11838797 |
| COQ2        | NM_015697.5 COQ2        |    | 4 Homo sapiens CL640; FLJ26     | 0.01458619 | 0.02695964 | 1.11835755 |
| NPLOC4      | NM_017921.1 NPLOC4      |    | 17 Homo sapiens FLJ20657; FLJ   | 0.00467554 | 0.01097016 | 1.11829464 |
| TFB1M       | NM_016020.1 TFB1M       |    | 6 Homo sapiens CGI75; mtTFB     | 0.00598754 | 0.01334548 | 1.11828445 |
| MRPS11      | NM_176805.1 MRPS11      |    | 15 Homo sapiens HCC-2; FLJ22'   | 0.00198328 | 0.0056058  | 1.1178573  |
| ATP1B1      | NM_00100178 ATP1B1      |    | 1 Homo sapiens MGC1798; ATI     | 0.00050417 | 0.00194233 | 1.11780239 |
| LOC10013464 | XM_00172468 LOC10013464 |    | 7 PREDICTED: Homo sapiens s     | 0.02656275 | 0.04298451 | 1.11763869 |
| FOXO3       | NM_001455.2 FOXO3       |    | 6 Homo sapiens FOXO2; FKHR1     | 0.01164192 | 0.02266649 | 1.11700369 |
| CNIH        | NM_005776.2 CNIH        |    | 14 Homo sapiens CNIH1; CNIL;    | 0.00018743 | 0.00091508 | 1.11633703 |
| BCL2L12     | NM_052842.2 BCL2L12     |    | 19 Homo sapiens MGC120315; I    | 7.74E-05   | 0.00048406 | 1.1163352  |
| YIF1A       | NM_020470.1 YIF1A       |    | 11 Homo sapiens FinGER7; 54TI   | 0.01054913 | 0.02093643 | 1.11616509 |
| ARIH2       | NM_006321.1 ARIH2       |    | 3 Homo sapiens FLJ10938; TRJ    | 0.00030347 | 0.00131034 | 1.11559026 |
| KIAA0355    | NM_014686.2 KIAA0355    |    | 19 Homo sapiens KIAA0355 (KI    | 0.0314866  | 0.0488085  | 1.11530262 |
| LOC347376   | XM_937928.1 LOC347376   |    | PREDICTED: Homo sapiens s       | 0.01170062 | 0.02273192 | 1.11454241 |
| LOC389517   | NM_00103238 LOC389517   |    | Homo sapiens similar to Willi   | 0.00209119 | 0.00583195 | 1.11440177 |

## 2.0 Upreg

|               |             |               |    |                            |            |            |            |
|---------------|-------------|---------------|----|----------------------------|------------|------------|------------|
| RP11-529I10.1 | NM_015448.1 | RP11-529I10.1 | 10 | Homo sapiens DKFZP566F08   | 0.01212146 | 0.0233409  | 1.11426901 |
| ANKMY2        | NM_020319.1 | ANKMY2        | 7  | Homo sapiens DKFZP564O04   | 0.02158609 | 0.03660441 | 1.11402439 |
| C16orf80      | NM_013242.2 | C16ORF80      | 16 | Homo sapiens EVORF; GTL3   | 0.01002675 | 0.02013129 | 1.11387162 |
| ELP3          | NM_018091.3 | ELP3          | 8  | Homo sapiens FLJ10422; KA  | 0.0173474  | 0.0308058  | 1.11383359 |
| ZNF330        | NM_014487.2 | ZNF330        | 4  | Homo sapiens NOA36; HSA6   | 0.01792649 | 0.03162745 | 1.11342283 |
| RNGTT         | NM_003800.1 | RNGTT         | 6  | Homo sapiens HCE1; hCAP; C | 0.00543611 | 0.01232881 | 1.1126038  |
| PMP22         | NM_153321.1 | PMP22         | 17 | Homo sapiens CMT1A; GAS-1  | 0.0083459  | 0.01738942 | 1.11228351 |
| GLA           | NM_000169.1 | GLA           |    | Homo sapiens GALA          | 0.00109863 | 0.00355144 | 1.11133838 |
| ZDHHC7        | NM_017740.1 | ZDHHC7        | 16 | Homo sapiens ZNF370; FLJ11 | 0.00053378 | 0.00202978 | 1.11111273 |
| BRD7          | NM_013263.2 | BRD7          | 16 | Homo sapiens CELTIX1; NAG  | 0.00552873 | 0.01249714 | 1.10956156 |
| DCTN5         | NM_032486.2 | DCTN5         | 16 | Homo sapiens MGC3248; p2   | 0.02548632 | 0.04170838 | 1.10928042 |
| TUSC4         | NM_006545.4 | TUSC4         | 3  | Homo sapiens NPR2L; NPRL2  | 0.00111535 | 0.00359158 | 1.10904703 |
| PRPF19        | NM_014502.3 | PRPF19        | 11 | Homo sapiens NMP200; PRP1  | 0.01874733 | 0.03270927 | 1.10894358 |
| TMEM14D       | XM_928242.2 | TMEM14D       | 10 | PREDICTED: Homo sapiens t  | 0.00023083 | 0.00106889 | 1.10838485 |
| CBWD5         | NM_00102491 | CBWD5         | 9  | Homo sapiens FLJ40320; DC  | 0.01889911 | 0.03293179 | 1.10818658 |
| BTAFL1        | NM_003972.2 | BTAFL1        | 10 | Homo sapiens BTAF172; KIAA | 0.01939764 | 0.03364404 | 1.10800461 |
| LOC728324     | XR_015322.2 | LOC728324     |    | PREDICTED: Homo sapiens n  | 0.00182064 | 0.00525824 | 1.10784138 |
| RAP2A         | NM_021033.4 | RAP2A         | 13 | Homo sapiens RAP2; K-REV;  | 0.00999778 | 0.02009912 | 1.10766847 |
| KRT10         | NM_000421.2 | KRT10         | 17 | Homo sapiens K10; KPP; CK1 | 0.0166831  | 0.02997387 | 1.10701099 |
| TMED9         | NM_017510.3 | TMED9         | 5  | Homo sapiens HSGP25L2G     | 0.00050391 | 0.00194271 | 1.10666257 |
| SERBP1        | NM_00101806 | SERBP1        | 1  | Homo sapiens CGI-55; FLJ9C | 0.02058038 | 0.03525099 | 1.10589446 |
| G6PD          | NM_000402.2 | G6PD          |    | Homo sapiens G6PD1         | 0.0185051  | 0.03239064 | 1.10569747 |
| LOC727808     | XR_041978.1 | LOC727808     |    | PREDICTED: Homo sapiens h  | 0.02684969 | 0.04334558 | 1.10494414 |
| LOC644330     | XM_946163.1 | LOC644330     | 19 | PREDICTED: Homo sapiens s  | 0.01091523 | 0.02151763 | 1.10445345 |
| CSNK1E        | NM_001894.4 | CSNK1E        | 22 | Homo sapiens MGC10398; H   | 0.02908739 | 0.04608189 | 1.10424218 |
| RAD51C        | NM_058216.1 | RAD51C        | 17 | Homo sapiens MGC104277; I  | 0.00105416 | 0.00343217 | 1.10419877 |
| CXXC1         | NM_014593.2 | CXXC1         | 18 | Homo sapiens SPP1; HsT264  | 0.00141448 | 0.00433518 | 1.10387526 |
| PNPLA6        | NM_006702.2 | PNPLA6        | 19 | Homo sapiens sws; NTE      | 0.00490576 | 0.01141177 | 1.10337657 |
| OCRL          | NM_001587.3 | OCRL          |    | Homo sapiens NPHL2; OCRL1  | 0.02295206 | 0.03839947 | 1.10223763 |
| CCBE1         | NM_133459.1 | CCBE1         | 18 | Homo sapiens FLJ30681; MG  | 0.00889467 | 0.0182805  | 1.10204469 |
| PRIM1         | NM_000946.2 | PRIM1         | 12 | Homo sapiens MGC12308; p   | 0.00122036 | 0.00384766 | 1.10191497 |
| LOC10013430   | XM_00172073 | LOC10013430   |    | PREDICTED: Homo sapiens s  | 0.00161187 | 0.00479939 | 1.10184675 |
| ANKIB1        | NM_019004.1 | ANKIB1        | 7  | Homo sapiens DKFZP434A02   | 0.01477489 | 0.02723431 | 1.10148872 |
| FGFRL1        | NM_00100435 | FGFRL1        | 4  | Homo sapiens FGFR5; FHFR   | 0.03199761 | 0.04948065 | 1.10130464 |
| DYNLT1        | NM_006519.1 | DYNLT1        | 6  | Homo sapiens tctex-1; CW-1 | 4.03E-05   | 0.0003079  | 1.10040298 |
| GAPVD1        | NM_015635.2 | GAPVD1        | 9  | Homo sapiens MGC138848; I  | 0.01227235 | 0.02357297 | 1.09956153 |
| C3orf26       | NM_032359.2 | C3ORF26       | 3  | Homo sapiens MGC4308       | 0.00683507 | 0.01485076 | 1.09915093 |
| TNFRSF12A     | NM_016639.1 | TNFRSF12A     | 16 | Homo sapiens CD266; TWEA   | 0.00308847 | 0.00790707 | 1.09852594 |
| SERTAD1       | NM_013376.1 | SERTAD1       | 19 | Homo sapiens TRIP-Br1; SEI | 0.00516348 | 0.01185648 | 1.09806015 |
| TAF10         | NM_006284.2 | TAF10         | 11 | Homo sapiens TAF2H; TAF2A  | 0.00217522 | 0.00600311 | 1.09774745 |
| R3HCC1        | XM_114618.6 | R3HCC1        |    | PREDICTED: Homo sapiens R  | 0.01337366 | 0.02519851 | 1.09698657 |
| PHPT1         | NM_014172.2 | PHPT1         | 9  | Homo sapiens bA216L13.10;  | 0.01629669 | 0.02943534 | 1.09633259 |
| CD81          | NM_004356.3 | CD81          | 11 | Homo sapiens S5.7; TAPA1;  | 0.00022884 | 0.00106104 | 1.09600019 |
| RAB3IP        | NM_175624.1 | RAB3IP        | 12 | Homo sapiens MGC71495; R   | 0.00767916 | 0.01626211 | 1.09488921 |
| HLA-E         | NM_005516.4 | HLA-E         | 6  | Homo sapiens DKFZp686P19   | 0.01196046 | 0.02312512 | 1.0946491  |
| LASS6         | NM_203463.1 | LASS6         | 2  | Homo sapiens CerS6; MGC12  | 0.00029231 | 0.00127175 | 1.09406565 |
| G3BP2         | NM_012297.3 | G3BP2         | 4  | Homo sapiens GTPase activa | 0.0120278  | 0.0232264  | 1.09364577 |
| FEZ2          | NM_005102.2 | FEZ2          | 2  | Homo sapiens MGC117372; I  | 0.00285154 | 0.00744428 | 1.09358565 |
| COPA          | NM_004371.2 | COPA          | 1  | Homo sapiens FLJ26320; HEI | 0.00112017 | 0.00360389 | 1.09301466 |
| THEM2         | NM_018473.2 | THEM2         | 6  | Homo sapiens HT012; PNAS-  | 0.01157951 | 0.02256115 | 1.0930051  |
| CDCA4         | NM_017955.2 | CDCA4         | 14 | Homo sapiens MGC19517; FI  | 0.00793593 | 0.01667589 | 1.09277591 |
| H3F3B         | NM_005324.3 | H3F3B         | 17 | Homo sapiens H3F3A; H3.3B  | 0.00060675 | 0.00225365 | 1.09174355 |
| KLHL8         | NM_020803.3 | KLHL8         | 4  | Homo sapiens FLJ46304; KIA | 0.01886959 | 0.03290144 | 1.09125881 |
| LRPPRC        | NM_133259.2 | LRPPRC        | 2  | Homo sapiens GP130; CLON   | 0.02523635 | 0.04136782 | 1.09024592 |
| CGGBP1        | NM_003663.3 | CGGBP1        | 3  | Homo sapiens CGGBP; p20-C  | 0.008355   | 0.01739838 | 1.08984115 |
| RAB2B         | NM_032846.2 | RAB2B         | 14 | Homo sapiens FLJ14824      | 0.00426114 | 0.01017357 | 1.08949344 |
| RARS          | NM_002887.3 | RARS          | 5  | Homo sapiens ArgRS; DALRC  | 0.00048601 | 0.00188573 | 1.08925876 |
| FNBP1         | NM_015033.2 | FNBP1         | 9  | Homo sapiens FBP17; MGC12  | 0.01261355 | 0.02409634 | 1.08913095 |
| POLB          | NM_002690.1 | POLB          | 8  | Homo sapiens MGC125976     | 0.00407787 | 0.0098245  | 1.08828576 |
| EFHA1         | NM_152726.1 | EFHA1         | 13 | Homo sapiens FLJ34588; FLJ | 0.00114975 | 0.00368381 | 1.08824951 |
| CCNF          | NM_001761.1 | CCNF          | 16 | Homo sapiens FBX1; FBXO1   | 0.00627081 | 0.01384343 | 1.08696355 |
| TRAPPC4       | NM_016146.1 | TRAPPC4       | 11 | Homo sapiens SBDN; CGI-10  | 0.01767075 | 0.03124727 | 1.0869418  |
| C19orf53      | NM_014047.1 | C19ORF53      | 19 | Homo sapiens HSPC023       | 0.00065068 | 0.00236983 | 1.08663254 |
| LOC644774     | XM_927868.1 | LOC644774     |    | PREDICTED: Homo sapiens s  | 0.02686525 | 0.04336425 | 1.08562401 |
| COX7A2L       | NM_004718.2 | COX7A2L       | 2  | Homo sapiens EB1; COX7RP;  | 0.00030108 | 0.0013026  | 1.08515653 |
| C15orf24      | NM_020154.2 | C15ORF24      | 15 | Homo sapiens C11orf3; HT02 | 0.00176184 | 0.00514169 | 1.08459624 |
| C18orf8       | NM_013326.2 | C18ORF8       | 18 | Homo sapiens HsT2591; MIC  | 0.00467176 | 0.01096365 | 1.08421326 |
| ACBD3         | NM_022735.3 | ACBD3         | 1  | Homo sapiens GOLPH1; PAP7  | 0.00673542 | 0.01467533 | 1.08402387 |
| POFUT1        | NM_015352.1 | POFUT1        | 20 | Homo sapiens O-Fuc-T; O-FU | 0.0213496  | 0.03631672 | 1.08389239 |
| RNF181        | NM_016494.3 | RNF181        | 2  | Homo sapiens HSPC238       | 0.00130618 | 0.00405819 | 1.08374212 |

## 2.0 Upreg

|             |             |              |    |                           |                 |            |            |             |
|-------------|-------------|--------------|----|---------------------------|-----------------|------------|------------|-------------|
| CHP         | NM_007236.3 | CHP          | 15 | Homo sapiens              | SLC9A1BP        | 0.0013653  | 0.00420701 | 1.08193798  |
| LOC10013254 | XR_039468.1 | LOC10013254  | 12 | PREDICTED: Homo sapiens n |                 | 0.02193039 | 0.03704374 | 1.08125047  |
| HNRNPA0     | NM_006805.3 | HNRNPA0      | 5  | Homo sapiens              | hnRNPA0         | 0.01675092 | 0.03007085 | 1.08105974  |
| SUCLG1      | NM_003849.1 | SUCLG1       | 2  | Homo sapiens              | FLJ21114; SU    | 0.00178109 | 0.00517839 | 1.08057242  |
| MYL12A      | NM_006471.2 | MYL12A       | 18 | Homo sapiens              | MLCB; MRLC3     | 0.00054432 | 0.00206264 | 1.08049457  |
| UTP6        | NM_018428.2 | UTP6         | 17 | Homo sapiens              | HCA66; C17or    | 0.00403296 | 0.00974221 | 1.08027346  |
| LOC647673   | XM_936731.1 | LOC647673    |    | PREDICTED: Homo sapiens s |                 | 0.00193102 | 0.00549523 | 1.08023453  |
| ALCAM       | NM_001627.2 | ALCAM        | 3  | Homo sapiens              | CD166; FLJ38    | 0.01386212 | 0.02588994 | 1.08022312  |
| VPS37C      | NM_017966.4 | VPS37C       | 11 | Homo sapiens              | FLJ20847        | 0.00682119 | 0.01483544 | 1.08017808  |
| PDXP        | NM_020315.3 | PDXP         | 22 | Homo sapiens              | CIN; FLJ3270:   | 0.00192236 | 0.00547634 | 1.08012136  |
| LOC10013093 | XM_00172657 | LOC100130932 |    | PREDICTED: Homo sapiens s |                 | 0.0138317  | 0.02585534 | 1.0800607   |
| DAP3        | NM_001867.1 | DAP3         | 1  | Homo sapiens              | MGC126059; I    | 0.00224761 | 0.00616066 | 1.07984405  |
| SAPS3       | NM_018312.3 | SAPS3        | 11 | Homo sapiens              | MGC125712; S    | 0.00683081 | 0.01485041 | 1.07877744  |
| CD2BP2      | NM_006110.1 | CD2BP2       | 16 | Homo sapiens              | FWP010; LIN1    | 0.00785194 | 0.01654418 | 1.07869169  |
| WDYHV1      | NM_018024.1 | WDYHV1       | 8  | Homo sapiens              | FLJ10204        | 0.02822163 | 0.04504519 | 1.07837922  |
| MMGT1       | XM_932381.1 | MMGT1 X      |    | Homo sapiens              | membrane ma     | 0.01156092 | 0.02253706 | 1.07720216  |
| RPUSD3      | NM_173659.2 | RPUSD3       | 3  | Homo sapiens              | FLJ34707; MG    | 0.01815265 | 0.03190217 | 1.07696426  |
| CCNK        | NM_003858.2 | CCNK         | 14 | Homo sapiens              | CPR4; MGC91     | 0.01958601 | 0.03388963 | 1.0766535   |
| LOC10013171 | XR_038705.1 | LOC100131718 |    | PREDICTED: Homo sapiens n |                 | 0.02495298 | 0.04100847 | 1.07584356  |
| COX7C       | NM_001867.1 | COX7C        | 5  | Homo sapiens              | cytochrome c    | 0.00163226 | 0.00484815 | 1.07577668  |
| LOC654121   | XM_942442.1 | LOC654121    |    | PREDICTED: Homo sapiens s |                 | 0.00227132 | 0.00621625 | 1.07539836  |
| TMEM9B      | NM_020644.1 | TMEM9B       | 11 | Homo sapiens              | C11orf15        | 0.01781215 | 0.03145125 | 1.07524954  |
| NDUFA8      | NM_014222.2 | NDUFA8       | 9  | Homo sapiens              | CI-19KD; PGI    | 0.00036953 | 0.00153052 | 1.07507377  |
| LOC401206   | XM_376420.3 | LOC401206    | 5  | PREDICTED: Homo sapiens s |                 | 0.01402077 | 0.02613683 | 1.07432299  |
| RAB5B       | NM_002868.2 | RAB5B        | 12 | Homo sapiens              | RAB5B, memb     | 0.00940153 | 0.01910901 | 1.07406218  |
| C21orf55    | NM_017833.2 | C21ORF55     | 21 | Homo sapiens              | C21orf78        | 0.01404674 | 0.02617177 | 1.07346626  |
| TMEM181     | XM_941693.1 | TMEM181      | 6  | Homo sapiens              | KIAA1423; GP    | 0.00816446 | 0.01708673 | 1.07229477  |
| ZDHHC8      | NM_013373.2 | ZDHHC8       | 22 | Homo sapiens              | ZNF378; ZDHI    | 0.00294582 | 0.00764086 | 1.0722763   |
| MBTPS1      | NM_201268.1 | MBTPS1       | 16 | Homo sapiens              | MGC138712; I    | 0.01802105 | 0.03174789 | 1.07217133  |
| TMEM14A     | NM_014051.2 | TMEM14A      | 6  | Homo sapiens              | C6orf73; PTDC   | 0.00434085 | 0.01032756 | 1.07184933  |
| ASCC2       | NM_032204.3 | ASCC2        | 22 | Homo sapiens              | ASC1p100        | 0.02908651 | 0.04608721 | 1.07160642  |
| TOMM70A     | NM_014820.3 | TOMM70A      | 3  | Homo sapiens              | FLJ90470        | 0.01993132 | 0.03437765 | 1.07146474  |
| LOC10012808 | XM_00171979 | LOC100128084 |    | PREDICTED: Homo sapiens h |                 | 0.01405335 | 0.0261796  | 1.071082624 |
| LOC10013030 | XR_036947.1 | LOC100130308 |    | PREDICTED: Homo sapiens n |                 | 0.02502161 | 0.04108399 | 1.07008754  |
| LOC255167   | NR_024424.1 | LOC255167    | 5  | Homo sapiens              | hypothetical L  | 0.01907644 | 0.03316103 | 1.06983326  |
| KCNH6       | NM_030779.2 | KCNH6        | 17 | Homo sapiens              | HERG2; ERG2     | 0.007989   | 0.01676148 | 1.06939771  |
| OSTC        | NM_021227.2 | OSTC         | 4  | Homo sapiens              | oligosaccharyl  | 0.00140389 | 0.00431002 | 1.06864128  |
| RALA        | NM_005402.2 | RALA         | 7  | Homo sapiens              | MGC48949; R     | 0.00591629 | 0.01321105 | 1.06832988  |
| SLC30A9     | NM_006345.3 | SLC30A9      | 4  | Homo sapiens              | C4orf1; HUEL;   | 0.01199305 | 0.02317575 | 1.06796881  |
| ETFA        | NM_000126.1 | ETFA         | 15 | Homo sapiens              | GAG2; MADD; E   | 0.00651169 | 0.01427946 | 1.06765879  |
| BUD31       | NM_003910.2 | BUD31        | 7  | Homo sapiens              | MGC111202; `    | 0.00460648 | 0.01085263 | 1.06751516  |
| GOT1        | NM_002079.1 | GOT1         | 10 | Homo sapiens              | GIG18           | 0.00282443 | 0.00738592 | 1.06681783  |
| MRPL17      | NM_022061.2 | MRPL17       | 11 | Homo sapiens              | RPML26; MRP-    | 0.00952684 | 0.01932395 | 1.06670347  |
| UBXN1       | NM_015853.3 | UBXN1        | 11 | Homo sapiens              | 2B28            | 0.00718425 | 0.01541833 | 1.06666194  |
| KLHDC3      | NM_057161.2 | KLHDC3       | 6  | Homo sapiens              | RP1-20C7.3; f   | 0.02191241 | 0.03702489 | 1.06662515  |
| DHCR24      | NM_014762.2 | DHCR24       | 1  | Homo sapiens              | Nbla03646; se   | 0.02897393 | 0.04594902 | 1.06614878  |
| RPS28       | NM_001031.4 | RPS28        | 19 | Homo sapiens              | ribosomal prot  | 0.00018254 | 0.00089808 | 1.06467517  |
| ARF4        | NM_001660.2 | ARF4         | 3  | Homo sapiens              | ARF2            | 0.0043289  | 0.01030365 | 1.0646237   |
| PGRMC1      | NM_006667.2 | PGRMC1 X     |    | Homo sapiens              | HPR6.6; MPR     | 0.00772477 | 0.01633641 | 1.06413575  |
| IL18        | NM_001562.2 | IL18         | 11 | Homo sapiens              | MGC12320; IL    | 0.00690207 | 0.01496045 | 1.06391629  |
| LOC90586    | XR_000544.1 | LOC90586     | 17 | PREDICTED: Homo sapiens A |                 | 0.0296071  | 0.04664685 | 1.06308904  |
| YWHAB       | NM_139323.2 | YWHAB        | 20 | Homo sapiens              | KCIP-1; HS1;    | 0.00439646 | 0.0104393  | 1.06303605  |
| EIF2B2      | NM_014239.2 | EIF2B2       | 14 | Homo sapiens              | EIF-2Bbeta; E   | 0.02815325 | 0.04498229 | 1.06281011  |
| SPOP        | NM_00100722 | SPOP         | 17 | Homo sapiens              | TEF2            | 0.01248976 | 0.02391029 | 1.06244346  |
| SCAP        | NM_012235.2 | SCAP         | 3  | Homo sapiens              | KIAA0199        | 0.01286355 | 0.02445357 | 1.06181606  |
| PFDN6       | NM_014260.2 | PFDN6        | 6  | Homo sapiens              | HKE2; PFD6; I   | 0.01455606 | 0.02693602 | 1.06130862  |
| ADIPOR1     | NM_015999.2 | ADIPOR1      | 1  | Homo sapiens              | ACDCR1; TESI    | 0.01255265 | 0.02399686 | 1.06099887  |
| C7orf30     | NM_138446.1 | C7ORF30      | 7  | Homo sapiens              | chromosome 7    | 0.00685079 | 0.01487896 | 1.06080655  |
| MIR1978     | NR_031742.1 | MIR1978      |    | Homo sapiens              | microRNA 197    | 0.00357951 | 0.00889597 | 1.06031774  |
| MMADHC      | NM_015702.2 | MMADHC       | 2  | Homo sapiens              | methylmalonic   | 0.02120818 | 0.03612137 | 1.06011511  |
| PGK1        | NM_000291.2 | PGK1 X       |    | Homo sapiens              | MGC117307; I    | 0.00741419 | 0.01581811 | 1.06006824  |
| POLR1D      | NM_015972.1 | POLR1D       | 13 | Homo sapiens              | MGC9850; RP     | 0.00555588 | 0.01255067 | 1.05995458  |
| LOC730187   | XR_042419.1 | LOC730187    |    | PREDICTED: Homo sapiens n |                 | 0.00306292 | 0.00786202 | 1.05968165  |
| ANKRD30B    | NM_00102986 | ANKRD30B     | 18 | Homo sapiens              | NY-BR-1.1       | 0.02427962 | 0.04018134 | 1.05941043  |
| LOC10013436 | XM_00171381 | LOC100134364 |    | PREDICTED: Homo sapiens h |                 | 0.00833658 | 0.01738    | 1.0589539   |
| RPL38       | NM_00103525 | RPL38        | 17 | Homo sapiens              | ribosomal rPL38 | 0.00326336 | 0.00825564 | 1.05872638  |
| PRDX2       | NM_181738.1 | PRDX2        | 19 | Homo sapiens              | TDPX1; MGC4     | 0.02105008 | 0.03590273 | 1.05852652  |
| ODC1        | NM_002539.1 | ODC1         | 2  | Homo sapiens              | ornithine deca  | 0.00397998 | 0.00965284 | 1.05810539  |
| CD151       | NM_004357.3 | CD151        | 11 | Homo sapiens              | TSPAN24; MEF    | 0.02655903 | 0.0429849  | 1.05723587  |
| COX7A2      | NM_001865.2 | COX7A2       | 6  | Homo sapiens              | MGC118950; I    | 0.00339085 | 0.00850489 | 1.05706505  |

2.0 Upreg

|           |             |           |    |                             |            |            |            |
|-----------|-------------|-----------|----|-----------------------------|------------|------------|------------|
| ARF1      | NM_00102422 | ARF1      | 1  | Homo sapiens ADP-ribosylati | 0.01927261 | 0.03348061 | 1.05698267 |
| CREB1     | NM_134442.2 | CREB1     | 2  | Homo sapiens MGC9284; CR    | 0.00837235 | 0.01742449 | 1.05690652 |
| LOC650276 | XM_939363.1 | LOC650276 |    | PREDICTED: Homo sapiens s   | 0.00511608 | 0.01177252 | 1.05647097 |
| COX17     | NM_005694.1 | COX17     | 3  | Homo sapiens MGC117386; I   | 0.00157051 | 0.00470719 | 1.05592005 |
| ATP6V1F   | NM_004231.2 | ATP6V1F   | 7  | Homo sapiens Vma7; MGC12    | 0.00419107 | 0.01004157 | 1.05580451 |
| CALM2     | NM_001743.3 | CALM2     | 2  | Homo sapiens PHKD; CAMII;   | 0.00155074 | 0.00466208 | 1.05516852 |
| RHEB      | NM_005614.2 | RHEB      | 7  | Homo sapiens MGC111559; I   | 0.01684431 | 0.03016377 | 1.05503308 |
| LOC390466 | XM_372521.1 | LOC390466 | 14 | PREDICTED: Homo sapiens s   | 0.00601276 | 0.01338522 | 1.05503177 |
| ARL6IP1   | NM_015161.1 | ARL6IP1   | 16 | Homo sapiens ARMER; AIP1;   | 0.0079675  | 0.01672929 | 1.0548774  |
| SEPW1     | NM_003009.2 | SEPW1     | 19 | Homo sapiens selW           | 0.01690378 | 0.03022047 | 1.05413509 |
| ARPC5     | NM_005717.2 | ARPC5     | 1  | Homo sapiens ARC16; dJ127   | 0.01254857 | 0.02399751 | 1.05387428 |
| FAM98A    | NM_015475.3 | FAM98A    | 2  | Homo sapiens DKFZp686O03    | 0.01933291 | 0.03355319 | 1.05305721 |
| CHCHD9    | XM_928381.1 | CHCHD9    | 9  | PREDICTED: Homo sapiens c   | 0.01051361 | 0.0208812  | 1.0528787  |
| LOC642975 | XR_036988.1 | LOC642975 |    | PREDICTED: Homo sapiens n   | 0.02058845 | 0.03524261 | 1.0528017  |
| DYNC1LI2  | NM_006141.2 | DYNC1LI2  | 16 | Homo sapiens DNCLI2; LIC2   | 0.02267216 | 0.03801898 | 1.05261997 |
| ARPC3     | NM_005719.2 | ARPC3     | 12 | Homo sapiens p21-Arc; ARC2  | 0.0276091  | 0.04428214 | 1.05246151 |
| ALKBH5    | NM_017758.2 | ALKBH5    | 17 | Homo sapiens OFOXD1; OFO    | 0.0037085  | 0.00917041 | 1.05202096 |
| ROBLD3    | NM_014017.2 | ROBLD3    |    | Homo sapiens roadblock dor  | 0.01685688 | 0.03017138 | 1.05177699 |
| TM9SF2    | NM_004800.1 | TM9SF2    | 13 | Homo sapiens P76; MGC117:   | 0.02219019 | 0.03741861 | 1.05155928 |
| POLR2H    | NM_006232.2 | POLR2H    | 3  | Homo sapiens RPB17; hsRBP   | 0.00255436 | 0.00682083 | 1.05102748 |
| XPNPEP3   | NM_022098.2 | XPNPEP3   | 22 | Homo sapiens APP3           | 0.02447373 | 0.04040415 | 1.05050636 |
| ATP6V1G1  | NM_004888.2 | ATP6V1G1  | 9  | Homo sapiens Vma10; ATP6J   | 0.02443148 | 0.04034666 | 1.05033197 |
| PKM2      | NM_002654.3 | PKM2      | 15 | Homo sapiens OIP3; TCB; PK  | 0.01811443 | 0.03186592 | 1.050203   |
| WBP5      | NM_00100661 | WBP5      |    | Homo sapiens DKFZp313K19    | 0.01889301 | 0.03292644 | 1.04998975 |
| ENY2      | NM_020189.4 | ENY2      | 8  | Homo sapiens DC6; FLJ2048   | 0.00788939 | 0.01660055 | 1.0498184  |
| LOC646630 | XM_929572.1 | LOC646630 | 13 | PREDICTED: Homo sapiens s   | 0.03022963 | 0.04735989 | 1.04960188 |
| C16orf61  | NM_020188.2 | C16ORF61  | 16 | Homo sapiens DC13; 231006   | 0.00967829 | 0.01957269 | 1.04855981 |
| TCEB1     | NM_005648.2 | TCEB1     | 8  | Homo sapiens SIII           | 0.01104543 | 0.02173095 | 1.04844086 |
| BCAP31    | NM_005745.6 | BCAP31    |    | Homo sapiens DXS1357E; 6C   | 0.01854605 | 0.03244414 | 1.04822538 |
| DCTN2     | NM_006400.3 | DCTN2     | 12 | Homo sapiens DCTN50; RBP1   | 0.02448128 | 0.04041047 | 1.04772306 |
| NDUFA3    | NM_004542.1 | NDUFA3    | 19 | Homo sapiens B9             | 0.01664588 | 0.02992184 | 1.04689779 |
| C8orf59   | XM_929832.1 | C8ORF59   | 8  | Homo sapiens chromosome 8   | 0.00281001 | 0.00735885 | 1.04672082 |
| ID1       | NM_181353.1 | ID1       | 20 | Homo sapiens ID             | 0.01001087 | 0.02011427 | 1.04649623 |
| SLC16A3   | NM_004207.2 | SLC16A3   | 17 | Homo sapiens MCT3; MGC13    | 0.02503986 | 0.04109532 | 1.04636396 |
| MAGEB2    | NM_002364.3 | MAGEB2    |    | Homo sapiens MAGE-XP-2; M   | 0.02210164 | 0.03729243 | 1.04634947 |
| RPL27     | NM_000988.2 | RPL27     | 17 | Homo sapiens ribosomal prot | 0.01440746 | 0.02672293 | 1.04617894 |
| EIF3H     | NM_003756.1 | EIF3H     | 8  | Homo sapiens EIF3S3; eIF3h  | 0.01209874 | 0.0233054  | 1.04573808 |
| P4HB      | NM_000918.2 | P4HB      | 17 | Homo sapiens GIT; DSI; PO4  | 0.02293506 | 0.03838286 | 1.04492619 |
| LOC728481 | XM_926984.1 | LOC728481 | 1  | PREDICTED: Homo sapiens s   | 0.01639025 | 0.02955031 | 1.04482253 |
| C2orf25   | NM_015702.1 | C2ORF25   | 2  | Homo sapiens CL25022        | 0.01466359 | 0.02708428 | 1.04442334 |
| AP2S1     | NM_004069.3 | AP2S1     | 19 | Homo sapiens AP17; CLAPS2   | 0.00451189 | 0.01067376 | 1.04438779 |
| NDUFB9    | NM_005005.2 | NDUFB9    | 8  | Homo sapiens DKFZp566O17    | 0.00600632 | 0.01337636 | 1.04382091 |
| MRPS10    | NM_018141.2 | MRPS10    | 6  | Homo sapiens FLJ10567; PN1  | 0.02247986 | 0.03777813 | 1.04320878 |
| H3F3A     | XR_001222.1 | H3F3A     | 1  | Homo sapiens MGC87783; H:   | 0.01057306 | 0.02096479 | 1.04295614 |
| PSMB7     | NM_002799.2 | PSMB7     | 9  | Homo sapiens Z              | 0.0190383  | 0.03313714 | 1.04205781 |
| SEC61G    | NM_014302.3 | SEC61G    | 7  | Homo sapiens SSS1           | 0.00404639 | 0.00976381 | 1.04101073 |
| LOC402175 | XR_038253.1 | LOC402175 |    | PREDICTED: Homo sapiens n   | 0.0147242  | 0.02717314 | 1.04097313 |
| LOC731542 | XR_015517.2 | LOC731542 |    | PREDICTED: Homo sapiens n   | 0.01754553 | 0.03108146 | 1.04011539 |
| C20orf24  | NM_199485.1 | C20ORF24  | 20 | Homo sapiens PNAS-11; RIP1  | 0.01047114 | 0.02081587 | 1.03959148 |
| ATP5J     | NM_00100370 | ATP5J     | 21 | Homo sapiens ATP5A; CF6; F  | 0.01120007 | 0.02195965 | 1.0387676  |
| OAZ1      | NM_004152.2 | OAZ1      | 19 | Homo sapiens OAZ; MGC138    | 0.02531325 | 0.0414626  | 1.03846927 |
| MRFAP1    | NM_033296.1 | MRFAP1    | 4  | Homo sapiens PAM14; PGR1    | 0.02618943 | 0.04258967 | 1.03782127 |
| STRAP     | NM_007178.2 | STRAP     | 12 | Homo sapiens MAWD; PT-WC    | 0.02601745 | 0.04237974 | 1.03739056 |
| LOC402057 | NM_00108049 | LOC402057 | 22 | Homo sapiens similar to 40S | 0.029883   | 0.046959   | 1.03677349 |
| FAM115A   | NM_014719.1 | FAM115A   | 7  | Homo sapiens KIAA0738       | 0.01475788 | 0.02722143 | 1.03656774 |
| LOC648729 | XR_039144.1 | LOC648729 | 8  | PREDICTED: Homo sapiens n   | 0.00781783 | 0.01649149 | 1.03531166 |
| SMN2      | NM_022875.1 | SMN2      | 5  | Homo sapiens SMNC; BCD54    | 0.00416913 | 0.01000222 | 1428.42036 |
| TES       | NM_015641.2 | TES       | 7  | Homo sapiens DKFZP586B20    | 5.49E-07   | 1.57E-05   | 299.601935 |
| CEND1     | NM_016564.2 | CEND1     | 11 | Homo sapiens FLJ90066; MG   | 3.42E-06   | 5.38E-05   | 242.6427   |
| SPRYD4    | NM_207344.1 | SPRYD4    | 12 | Homo sapiens DKFZp686N08    | 0.00182229 | 0.0052602  | 171.176695 |
| MYO19     | NM_00103358 | MYO19     | 17 | Homo sapiens FLJ22865; MY   | 8.66E-06   | 0.00010071 | 157.288787 |
| ABCA3     | NM_001089.1 | ABCA3     | 16 | Homo sapiens ABC-C; EST11   | 0.01022662 | 0.02043067 | 156.162869 |
| CORO6     | NM_032854.1 | CORO6     | 17 | Homo sapiens FLJ14871       | 0.00024972 | 0.00112708 | 73.8383842 |
| KLRC2     | NM_002260.3 | KLRC2     | 12 | Homo sapiens NKG2-C; CD1!   | 1.21E-07   | 6.06E-06   | 55.8551391 |
| TM4SF18   | NM_138786.1 | TM4SF18   | 3  | Homo sapiens L6D            | 0.00015351 | 0.00078733 | 38.1466038 |
| ARC       | NM_015193.3 | ARC       | 8  | Homo sapiens KIAA0278       | 1.54E-06   | 3.11E-05   | 35.8661271 |
| RNF160    | NM_015565.1 | RNF160    | 21 | Homo sapiens FLJ11053; RN   | 0.00372667 | 0.00920069 | 35.738803  |
| DNAJC2    | NM_014377.1 | DNAJC2    | 7  | Homo sapiens MPP11; MPH0    | 0.00149504 | 0.00453732 | 34.9789065 |
| FAR2      | NM_018099.3 | FAR2      | 12 | Homo sapiens FAR2; FLJ104   | 5.31E-06   | 7.21E-05   | 34.4907576 |
| LRRC49    | NM_017691.2 | LRRC49    | 15 | Homo sapiens FLJ20156       | 1.17E-06   | 2.55E-05   | 30.4108136 |

## 2.0 Upreg

|             |             |              |                                |                              |            |            |            |
|-------------|-------------|--------------|--------------------------------|------------------------------|------------|------------|------------|
| LAMP3       | NM_014398.2 | LAMP3        | 3 Homo sapiens TSC403; DC-L    | 1.53E-07                     | 6.83E-06   | 30.068582  |            |
| GFPT2       | NM_005110.1 | GFPT2        | 5 Homo sapiens GFAT2; FLJ10:   | 2.98E-06                     | 4.85E-05   | 29.2706824 |            |
| DNA2        | NM_00108044 | DNA2         | 10 Homo sapiens KIAA0083; DN   | 0.01193052                   | 0.02308776 | 28.2220645 |            |
| LOC285550   | XR_001250.1 | LOC285550    | PREDICTED: Homo sapiens n      | 0.01207041                   | 0.02327972 | 27.4624467 |            |
| SEMA3C      | NM_006379.2 | SEMA3C       | 7 Homo sapiens SEMAE; SemE     | 5.61E-05                     | 0.00038932 | 27.3882883 |            |
| C5orf34     | NM_198566.1 | C5ORF34      | 5 Homo sapiens MGC46448; FL    | 0.00199458                   | 0.00563186 | 27.1011378 |            |
| NEBL        | NM_006393.1 | NEBL         | 10 Homo sapiens MGC119747; I   | 5.68E-05                     | 0.00039189 | 25.9723766 |            |
| C14orf45    | NM_025075.1 | C14ORF45     | 14 Homo sapiens FLJ23189       | 0.00010398                   | 0.0005951  | 25.3425883 |            |
| LOC400836   | XR_018904.2 | LOC400836    | PREDICTED: Homo sapiens n      | 0.02046309                   | 0.03509434 | 24.5013272 |            |
| C14orf132   | NM_020215.2 | C14ORF132    | 14 Homo sapiens DKFZp761F20    | 5.66E-05                     | 0.00039152 | 23.8023782 |            |
|             | Hs.133261   | Hs.133261    | Y                              | UI-E-EJ0-aiq-m-17-0-UI.r1 U  | 0.00042295 | 0.00169866 | 23.1306905 |
| HEG1        | XM_087386.8 | HEG1         | 3 Homo sapiens KIAA1237; MS    | 2.20E-05                     | 0.00019947 | 23.0484594 |            |
| S1PR5       | NM_030760.3 | S1PR5        | 19 Homo sapiens SPPR-2; SPPR-  | 0.01013088                   | 0.02029911 | 22.1711862 |            |
|             | Hs.505676   | Hs.505676    |                                | 12 Homo sapiens cDNA FLJ3377 | 9.65E-08   | 5.17E-06   | 22.0251458 |
| SLC36A1     | NM_078483.2 | SLC36A1      | 5 Homo sapiens TRAMD3; PAT:    | 5.11E-07                     | 1.50E-05   | 21.3909684 |            |
| PGF         | NM_002632.4 | PGF          | 14 Homo sapiens PGFL; PIGF-2;  | 0.00099806                   | 0.00328495 | 21.2031686 |            |
| LOC10013430 | XM_00172071 | LOC100134301 | PREDICTED: Homo sapiens h      | 0.00449806                   | 0.01065495 | 19.810088  |            |
|             | Hs.98330    | Hs.98330     |                                | PREDICTED: Homo sapiens h    | 0.0092     | 0.0187837  | 19.5537641 |
| TMEM166     | NM_032181.1 | TMEM166      | 2 Homo sapiens FLJ13391        | 0.00294125                   | 0.00763263 | 18.082228  |            |
| C12orf26    | NM_032230.1 | C12ORF26     | 12 Homo sapiens FLJ22789       | 5.16E-08                     | 3.62E-06   | 18.0372824 |            |
| ZNF767      | NM_024910.1 | ZNF767       | 7 Homo sapiens MGCS1818; FL    | 0.00210371                   | 0.00585632 | 17.871045  |            |
| MYBBP1A     | NM_014520.1 | MYBBP1A      | Homo sapiens PAP2; P160; F     | 0.01667121                   | 0.02995745 | 17.7729712 |            |
| GPRIN1      | NM_052899.1 | GPRIN1       | 5 Homo sapiens KIAA1893; GR    | 2.05E-05                     | 0.00018857 | 17.0784829 |            |
| ADPRHL1     | NM_199162.1 | ADPRHL1      | 13 Homo sapiens ARH2           | 0.00289391                   | 0.00753499 | 17.0378924 |            |
| NAPEPLD     | NM_198990.3 | NAPEPLD      | 7 Homo sapiens FMP30; NAPE-    | 5.99E-06                     | 7.86E-05   | 15.2429616 |            |
| CHMP7       | NM_152272.2 | CHMP7        | 8 Homo sapiens MGC29816        | 0.01274389                   | 0.02428557 | 15.0990651 |            |
| TMEM59L     | NM_012109.2 | TMEM59L      | 19 Homo sapiens BSMAP; C19or   | 5.20E-08                     | 3.60E-06   | 14.5860056 |            |
| KIAA0513    | NM_014732.2 | KIAA0513     | 16 Homo sapiens KIAA0513 (KI   | 6.08E-05                     | 0.0004074  | 14.1891901 |            |
| SNORA17     | NR_002958.1 | SNORA17      | 9 Homo sapiens ACA17           | 0.00486337                   | 0.01134474 | 13.8116369 |            |
| ENPP5       | NM_021572.4 | ENPP5        | 6 Homo sapiens KIAA0879        | 1.79E-07                     | 7.49E-06   | 13.1401558 |            |
| SERPINE1    | NM_000602.1 | SERPINE1     | 7 Homo sapiens PAI; PAI-1; PA  | 1.40E-06                     | 2.91E-05   | 13.0884012 |            |
| ESAM        | NM_138961.1 | ESAM         | 11 Homo sapiens W117m          | 7.57E-08                     | 4.47E-06   | 13.0582403 |            |
| FAM46C      | NM_017709.2 | FAM46C       | 1 Homo sapiens FLJ20202        | 0.00015232                   | 0.00078269 | 12.8473254 |            |
| SRPX2       | NM_014467.1 | SRPX2        | X                              | Homo sapiens SRPUL; RESD)    | 0.00058466 | 0.00218728 | 12.188106  |
| IVD         | NM_002225.2 | IVD          | 15 Homo sapiens ACAD2          | 0.02225433                   | 0.03750931 | 11.9638112 |            |
| SLC22A17    | NM_016609.3 | SLC22A17     | 14 Homo sapiens BOIT; BOCT; b  | 1.87E-06                     | 3.52E-05   | 11.7216818 |            |
| TMTc4       | NM_032813.2 | TMTc4        | 13 Homo sapiens FLJ22153; FLJ  | 7.22E-05                     | 0.00046045 | 11.4771653 |            |
| CHSY3       | NM_175856.4 | CHSY3        | 5 Homo sapiens CSS3; CHSY2     | 0.00042876                   | 0.00171757 | 11.0491309 |            |
| PDLIM7      | NM_005451.3 | PDLIM7       | 5 Homo sapiens PDZ and LIM c   | 0.00037901                   | 0.00155671 | 10.8176521 |            |
| CHD5        | NM_015557.1 | CHD5         | 1 Homo sapiens KIAA0444; DK    | 3.51E-07                     | 1.16E-05   | 10.7901794 |            |
| OR7E156P    | NR_002171.1 | OR7E156P     | 13 Homo sapiens olfactory rece | 9.45E-06                     | 0.00010694 | 10.4544178 |            |
| BAPX1       | NM_001189.2 | BAPX1        | 4 Homo sapiens NKX3B; NKX3-    | 0.00150799                   | 0.00456385 | 10.3069163 |            |
| PLAT        | NM_000930.2 | PLAT         | 8 Homo sapiens T-PA; DKFZp6:   | 0.0003752                    | 0.00154575 | 9.71407628 |            |
| KCNK13      | NM_022054.2 | KCNK13       | 14 Homo sapiens THIK-1; THIK1  | 0.0136702                    | 0.02561954 | 9.04309386 |            |
| CRISPLD2    | NM_031476.1 | CRISPLD2     | 16 Homo sapiens DKFZP434B04    | 6.70E-10                     | 2.70E-07   | 9.0209685  |            |
| GINS4       | NM_032336.1 | GINS4        | 8 Homo sapiens MGC14799; SI    | 0.02463744                   | 0.04060041 | 8.85431774 |            |
| SPATA7      | NM_018418.1 | SPATA7       | 14 Homo sapiens MGC102934; I   | 1.48E-05                     | 0.00014714 | 8.70732135 |            |
| COL1A1      | NM_000088.2 | COL1A1       | 17 Homo sapiens OI4            | 1.91E-07                     | 7.91E-06   | 8.61682613 |            |
| GCNT3       | NM_004751.1 | GCNT3        | 15 Homo sapiens C2/4GnT; GnT   | 3.09E-06                     | 4.97E-05   | 8.43108526 |            |
| CPA4        | NM_016352.2 | CPA4         | 7 Homo sapiens CPA4            | 1.15E-10                     | 9.63E-08   | 8.27241063 |            |
| SYK         | NM_003177.3 | SYK          | 9 Homo sapiens spleen tyrosin  | 0.00655038                   | 0.01435274 | 8.16010823 |            |
| PTPN9       | NM_002833.2 | PTPN9        | PREDICTED: Homo sapiens p      | 0.00378674                   | 0.00929831 | 8.06913959 |            |
| ANKRD33     | NM_182608.2 | ANKRD33      | 12 Homo sapiens DKFZp686O16    | 0.00092433                   | 0.00309382 | 7.89601337 |            |
| GULP1       | NM_016315.2 | GULP1        | 2 Homo sapiens CED-6; FLJ31:   | 0.00216309                   | 0.00598181 | 7.79134637 |            |
| SNN         | NM_003498.3 | SNN          | 16 Homo sapiens stannin (SNN)  | 1.00E-05                     | 0.00011164 | 7.73602433 |            |
| WFDC3       | NM_080614.1 | WFDC3        | 20 Homo sapiens WAP14; dJ447   | 0.00439248                   | 0.01043441 | 7.39044882 |            |
| GSTT2B      | NM_00108084 | GSTT2B       | 22 Homo sapiens MGC87963; G    | 8.57E-05                     | 0.00052031 | 7.3444017  |            |
| USH1G       | NM_173477.2 | USH1G        | 17 Homo sapiens ANKS4A; FLJ3   | 0.00790219                   | 0.01662428 | 7.26541883 |            |
| SMAD6       | NM_005585.2 | SMAD6        | 15 Homo sapiens MADH6; HsT1'   | 9.82E-05                     | 0.00057157 | 7.22603314 |            |
| DNER        | NM_139072.2 | DNER         | 2 Homo sapiens bet; UNQ26      | 1.83E-08                     | 1.93E-06   | 7.03057623 |            |
| METT10D     | NM_024086.2 | METT10D      | 17 Homo sapiens MGC3329        | 0.00370866                   | 0.00916872 | 7.00415784 |            |
| SLC38A6     | NM_153811.1 | SLC38A6      | 14 Homo sapiens NAT-1; MGC1C   | 0.00073805                   | 0.00260679 | 6.99871897 |            |
| AACS        | NM_023928.2 | AACS         | 12 Homo sapiens FLJ41251; SU   | 0.00523657                   | 0.01199138 | 6.98855995 |            |
| LOC654433   | NR_015377.1 | LOC654433    | 2 Homo sapiens DKFZp686E10     | 0.02090443                   | 0.03571036 | 6.90829495 |            |
|             | Hs.20255    | Hs.20255     |                                | 2 AV652851 GLC Homo sapien:  | 0.02240126 | 0.03769266 | 6.82101752 |
| TCIRG1      | NM_006019.2 | TCIRG1       | 11 Homo sapiens ATP6N1C; OC-   | 9.99E-05                     | 0.00057746 | 6.64110181 |            |
| EFNB1       | NM_004429.3 | EFNB1        | X                              | Homo sapiens MGC8782; LEF    | 0.00871605 | 0.01798482 | 6.54599407 |
| FHL1        | NM_001449.3 | FHL1         | X                              | Homo sapiens KYO-T; SLIM1;   | 7.11E-07   | 1.84E-05   | 6.49047286 |
| RAB6B       | NM_016577.2 | RAB6B        | 3 Homo sapiens RAB6B, memb     | 2.16E-05                     | 0.00019705 | 6.280325   |            |
| EGFL7       | NM_016215.3 | EGFL7        | 9 Homo sapiens RP11-251M1.2    | 0.00366183                   | 0.00906946 | 6.27768864 |            |

## 2.0 Upreg

|             |             |             |    |                                |            |            |            |
|-------------|-------------|-------------|----|--------------------------------|------------|------------|------------|
| HSD11B2     | NM_000196.2 | HSD11B2     | 16 | Homo sapiens AME1; HSD2;       | 0.0004608  | 0.0018073  | 6.24146649 |
| RFESD       | NM_173362.2 | RFESD       | 5  | Homo sapiens Rieske (Fe-S)     | 0.01708094 | 0.03045204 | 6.14194827 |
| APLP1       | NM_005166.3 | APLP1       | 19 | Homo sapiens APLP              | 1.14E-05   | 0.00012148 | 6.13388393 |
| LOC644517   | XR_042369.1 | LOC644517   | 4  | PREDICTED: Homo sapiens n      | 0.00937999 | 0.01907592 | 6.11802162 |
| MSL1        | NM_00101224 | MSL1        | 17 | Homo sapiens DKFZp686J17:      | 0.00191091 | 0.00545372 | 5.99664959 |
| LOC10013172 | XM_00172015 | LOC10013172 | 4  | PREDICTED: Homo sapiens h      | 2.51E-05   | 0.00021957 | 5.96964683 |
| TBX18       | NM_00108050 | TBX18       | 6  | Homo sapiens T-box 18 (TBX     | 0.00583898 | 0.01307603 | 5.90195983 |
| PRKACB      | NM_207578.1 | PRKACB      | 1  | Homo sapiens PKACB; MGC4       | 2.86E-05   | 0.00024074 | 5.87021937 |
| OLFML2A     | NM_182487.1 | OLFML2A     | 9  | Homo sapiens PRO34319; FL      | 6.35E-06   | 8.21E-05   | 5.77791161 |
| CCDC92      | NM_025140.1 | CCDC92      | 12 | Homo sapiens FLJ22471          | 2.33E-05   | 0.00020691 | 5.6900378  |
| CCNT2       | NM_001241.2 | CCNT2       | 2  | Homo sapiens FLJ90560; MG      | 0.00278134 | 0.00730842 | 5.64458752 |
| C22orf34    | NM_198851.1 | C22ORF34    | 22 | Homo sapiens chromosome 2      | 0.0025641  | 0.00684179 | 5.56354331 |
| SLC2A3      | NM_006931.1 | SLC2A3      | 12 | Homo sapiens GLUT3; FLJ90:     | 2.18E-10   | 1.40E-07   | 5.55821921 |
| ARRDC1      | NM_152285.2 | ARRDC1      | 9  | Homo sapiens RP11-48C7.5;      | 0.01722452 | 0.03063264 | 5.55125439 |
| HNF1B       | NM_000458.2 | HNF1B       | 17 | Homo sapiens VHNH1; MODY       | 9.60E-06   | 0.00010823 | 5.52947109 |
|             | Hs.202140   | Hs.202140   |    | BX114021 NCI_CGAP_Lu24 f       | 0.00011733 | 0.00064664 | 5.50692295 |
|             | Hs.22689    | HS.22689    |    | Homo sapiens mRNA; cDNA I      | 0.00093942 | 0.00313083 | 5.49266072 |
| SEMA6A      | NM_020796.2 | SEMA6A      | 5  | Homo sapiens VIA; SEMAQ; :     | 2.59E-08   | 2.18E-06   | 5.36114394 |
| PLA2G10     | NM_003561.1 | PLA2G10     | 16 | Homo sapiens GXPLA2; SPLA      | 2.22E-07   | 8.72E-06   | 5.26696467 |
| PCBP4       | NM_033009.1 | PCBP4       | 3  | Homo sapiens LIP4; MCG10       | 0.00081395 | 0.00280115 | 5.25621898 |
| AADAC       | NM_001086.2 | AADAC       | 3  | Homo sapiens CES5A1; DAC       | 0.01457969 | 0.0269568  | 5.24555874 |
| ZNF805      | NM_00102356 | ZNF805      | 19 | Homo sapiens DKFZp686P08       | 0.01321159 | 0.0249407  | 5.23391019 |
| TGFBRAP1    | NM_004257.3 | TGFBRAP1    | 2  | Homo sapiens TRAP-1; TRAP      | 0.00486882 | 0.01135501 | 5.22594538 |
| GSTM1       | NM_000561.2 | GSTM1       | 1  | Homo sapiens MGC26563; G       | 1.36E-06   | 2.85E-05   | 5.19292194 |
| LOC253039   | NR_024408.1 | LOC253039   | 9  | Homo sapiens hypothetical L    | 0.01452195 | 0.02689121 | 5.14965877 |
| PITPNA      | NM_006224.2 | PITPNA      | 17 | Homo sapiens PITPN; VIB1A;     | 0.00043496 | 0.00173728 | 5.09667042 |
| WDR91       | NM_014149.2 | WDR91       | 7  | Homo sapiens HSPC049           | 0.0069502  | 0.0150288  | 5.08394891 |
| TCEAL5      | NM_00101297 | TCEAL5      |    | Homo sapiens transcription e   | 0.01396271 | 0.02605542 | 5.00405666 |
| HERC6       | NM_00101300 | HERC6       | 4  | Homo sapiens FLJ20637          | 0.00953256 | 0.01933195 | 4.80501107 |
| FARP1       | NM_00100171 | FARP1       | 13 | Homo sapiens CDEP; PLEKHC      | 2.69E-05   | 0.00023116 | 4.80354705 |
| FUT4        | NM_002033.2 | FUT4        | 11 | Homo sapiens FCT3A; ELFT;      | 9.23E-05   | 0.00054653 | 4.7349845  |
| LIMCH1      | NM_014988.1 | LIMCH1      | 4  | Homo sapiens DKFZp686B24       | 0.00500549 | 0.01157687 | 4.7182365  |
| STAT4       | NM_003151.2 | STAT4       | 2  | Homo sapiens signal transdu    | 2.05E-06   | 3.78E-05   | 4.6390525  |
| BEGAIN      | NM_020836.2 | BEGAIN      | 14 | Homo sapiens KIAA1446; BE      | 1.37E-07   | 6.48E-06   | 4.60036674 |
| HPCAL4      | NM_016257.2 | HPCAL4      | 1  | Homo sapiens DKFZp761G12       | 1.85E-07   | 7.68E-06   | 4.59035749 |
| LEPR        | NM_002303.3 | LEPR        | 1  | Homo sapiens OBR; CD295        | 0.00496647 | 0.01151848 | 4.58681266 |
| CD40        | NM_001250.3 | CD40        | 20 | Homo sapiens TNFRSF5; p50      | 0.00126919 | 0.00396821 | 4.58351723 |
| WBSCR16     | XM_933544.1 | WBSCR16     | 7  | Homo sapiens DKFZp434D04       | 0.00015786 | 0.00080472 | 4.57134682 |
| AP2A2       | NM_012305.2 | AP2A2       | 11 | Homo sapiens CLAPA2; HYPJ      | 0.00147942 | 0.00449493 | 4.55741113 |
| CKMT1B      | NM_020990.3 | CKMT1B      | 15 | Homo sapiens UMTCCK; CKMT      | 1.59E-08   | 1.86E-06   | 4.55436219 |
| FLJ35767    | NM_207459.1 | FLJ35767    | 17 | Homo sapiens FLJ35767 prot     | 3.55E-12   | 9.64E-09   | 4.54060616 |
| BBS4        | NM_033028.2 | BBS4        | 15 | Homo sapiens Bardet-Biedl s    | 0.00162911 | 0.00484277 | 4.53295705 |
| PLEKHB1     | NM_021200.1 | PLEKHB1     | 11 | Homo sapiens PHR1; PHRET1      | 1.71E-10   | 1.16E-07   | 4.52660955 |
| LOC649025   | XM_938110.1 | LOC649025   |    | PREDICTED: Homo sapiens h      | 1.06E-06   | 2.42E-05   | 4.4903635  |
| HIST1H2BD   | NM_138720.1 | HIST1H2BD   | 6  | Homo sapiens H2B.1B; HIRI      | 9.73E-11   | 8.82E-08   | 4.46468265 |
| MGC18216    | XM_927732.1 | MGC18216    | 15 | PREDICTED: Homo sapiens h      | 2.98E-05   | 0.00024768 | 4.4386977  |
|             | Hs.547277   | HS.547277   |    | 1 zh47e08.r1 Soares_fetal_live | 0.00727475 | 0.01556338 | 4.43104276 |
| OVOL2       | NM_021220.2 | OVOL2       | 20 | Homo sapiens EUROIMAGE5f       | 0.00152528 | 0.00459955 | 4.39316189 |
| METTL10     | NM_212554.2 | METTL10     | 10 | Homo sapiens methyltransfe     | 0.00415177 | 0.00996939 | 4.36664432 |
| CCNYL1      | NM_152523.1 | CCNYL1      | 2  | Homo sapiens FLJ40432          | 2.24E-06   | 4.06E-05   | 4.35090136 |
| DOK4        | NM_018110.2 | DOK4        | 16 | Homo sapiens FLJ10488          | 0.00044171 | 0.0017533  | 4.30188056 |
| RBMS2       | NM_002898.2 | RBMS2       | 12 | Homo sapiens SCR3              | 0.00294977 | 0.00764744 | 4.29056221 |
| NUDT6       | NM_007083.3 | NUDT6       | 4  | Homo sapiens ASFGF2; gfg-1     | 0.00157306 | 0.00471093 | 4.2808442  |
| HLA-DRA     | NM_019111.3 | HLA-DRA     | 6  | Homo sapiens HLA-DRA1          | 2.17E-09   | 5.62E-07   | 4.26587575 |
| CTGF        | NM_001901.2 | CTGF        | 6  | Homo sapiens CCN2; MGC10       | 1.30E-11   | 2.35E-08   | 4.24237896 |
| FAM13A      | NM_014883.2 | FAM13A      | 4  | Homo sapiens FLJ34562; MG      | 0.00264901 | 0.00703211 | 4.22115883 |
| HLA-DMB     | NM_002118.3 | HLA-DMB     | 6  | Homo sapiens D6S221E; RIN      | 1.04E-08   | 1.45E-06   | 4.18647506 |
| ABCC10      | NM_033450.2 | ABCC10      | 6  | Homo sapiens MRP7; EST182      | 2.64E-05   | 0.00022776 | 4.16967341 |
| FLJ90757    | NM_00100433 | FLJ90757    | 17 | PREDICTED: Homo sapiens h      | 2.56E-07   | 9.35E-06   | 4.14697232 |
| C9orf25     | NM_147202.1 | C9ORF25     | 9  | Homo sapiens bA573M23.5;       | 0.00159947 | 0.00477031 | 4.12466579 |
| DIDO1       | NM_080797.2 | DIDO1       | 20 | Homo sapiens dJ885L7.8; DI     | 0.02888778 | 0.04583246 | 4.11244684 |
| PKP3        | NM_007183.2 | PKP3        | 11 | Homo sapiens plakophilin 3 (   | 0.00319358 | 0.00812069 | 4.10328299 |
| MKS1        | NM_017777.1 | MKS1        | 17 | Homo sapiens FLJ20345; ME      | 0.0014954  | 0.00453712 | 4.10266294 |
| HIST2H2AA3  | NM_003516.2 | HIST2H2AA3  | 1  | Homo sapiens H2a-615; H2A      | 1.01E-05   | 0.00011253 | 4.10158005 |
| AMN1        | NM_207337.1 | AMN1        | 12 | Homo sapiens antagonist of r   | 0.00012045 | 0.00065914 | 4.02545072 |
| LOC730153   | XM_00171767 | LOC730153   | 16 | PREDICTED: Homo sapiens h      | 9.49E-06   | 0.00010172 | 4.02516904 |
| HES2        | NM_019089.3 | HES2        | 1  | Homo sapiens hairy and enh:    | 6.39E-07   | 1.74E-05   | 4.02453402 |
| FAM108A3    | NM_00108042 | FAM108A3    | 1  | Homo sapiens FAM108A2; C1      | 0.00028627 | 0.00125551 | 4.01150877 |
| SMPDL3A     | NM_006714.2 | SMPDL3A     | 6  | Homo sapiens yR36GH4.1; F      | 0.00122115 | 0.00384679 | 4.00286932 |
| CD47        | NM_00102508 | CD47        | 3  | Homo sapiens OAS3; MER6; I     | 5.02E-07   | 1.48E-05   | 3.97885248 |



## 2.0 Upreg

|            |             |            |                                  |            |            |            |
|------------|-------------|------------|----------------------------------|------------|------------|------------|
| GAL3ST4    | NM_024637.3 | GAL3ST4    | 7 Homo sapiens FLJ12116; GA      | 7.15E-05   | 0.00045793 | 3.95464472 |
| LOC650708  | XM_939796.1 | LOC650708  | PREDICTED: Homo sapiens s        | 0.00457891 | 0.01080173 | 3.94878903 |
| HYAL3      | NM_003549.2 | HYAL3      | 3 Homo sapiens LUCA14; Minn      | 2.90E-05   | 0.00024373 | 3.94449318 |
| TMEM191B   | XM_938147.1 | TMEM191B   | 22 PREDICTED: Homo sapiens t     | 0.00042988 | 0.00172078 | 3.94226095 |
| LOC441714  | XR_019458.2 | LOC441714  | PREDICTED: Homo sapiens n        | 0.01059529 | 0.02099738 | 3.9347196  |
| USP46      | NM_022832.2 | USP46      | 4 Homo sapiens FLJ12552          | 0.00011309 | 0.00062964 | 3.89907233 |
| LOC730323  | XM_00172209 | LOC730323  | 7 PREDICTED: Homo sapiens h      | 4.29E-05   | 0.00032331 | 3.86748262 |
| ZMIZ2      | NM_00100276 | ZMIZ2      | 7 Homo sapiens DKFZp761I21.      | 1.10E-07   | 5.68E-06   | 3.84869901 |
| PRF1       | NM_005041.3 | PRF1       | 10 Homo sapiens HPLH2; FLH2;     | 7.03E-06   | 8.84E-05   | 3.8192034  |
|            | Hs.547601   | HS.547601  | 22 Homo sapiens full length inse | 1.49E-06   | 3.04E-05   | 3.79013575 |
| TMOD1      | NM_003275.1 | TMOD1      | 9 Homo sapiens ETMOD; D9S5       | 0.00095976 | 0.00318495 | 3.74763291 |
| LOC653158  | XM_926814.1 | LOC653158  | 5 PREDICTED: Homo sapiens s      | 2.13E-05   | 0.00019491 | 3.73837159 |
| C8orf83    | NR_015339.1 | C8ORF83    | 8 Homo sapiens FLJ40637; DK      | 0.00276042 | 0.00726749 | 3.65721582 |
| KIAA1804   | NM_032435.1 | KIAA1804   | 1 Homo sapiens RP5-862P8.2;      | 0.00985304 | 0.01985222 | 3.64128651 |
| LOC728285  | XM_937100.1 | LOC728285  | 17 PREDICTED: Homo sapiens s     | 1.79E-07   | 7.51E-06   | 3.63831131 |
| DNAJB12    | NM_00100276 | DNAJB12    | 10 Homo sapiens DJ10; DKFZp5     | 0.03135807 | 0.04867869 | 3.59746858 |
| PTPN23     | NM_015466.1 | PTPN23     | 3 Homo sapiens HDPTP; KIAA1      | 0.02463816 | 0.04059544 | 3.5910285  |
| SCARNA18   | NR_003139.1 | SCARNA18   | 5 Homo sapiens U109              | 7.06E-07   | 1.84E-05   | 3.58938669 |
| GALNT2     | NM_004481.2 | GALNT2     | 1 Homo sapiens GalNAc-T2         | 0.00081921 | 0.00281478 | 3.57318483 |
| GLDC       | NM_000170.1 | GLDC       | 9 Homo sapiens MGC138198; (      | 2.01E-08   | 2.04E-06   | 3.56463428 |
|            | Hs.21177    | HS.21177   | 6 Homo sapiens mRNA full leng    | 0.00163642 | 0.00485919 | 3.54198526 |
| MMP11      | NM_005940.3 | MMP11      | 22 Homo sapiens ST3; SL-3; ST    | 0.00108531 | 0.00351359 | 3.47504873 |
| ZHX3       | NM_015035.3 | ZHX3       | 20 Homo sapiens KIAA0395; TI     | 0.00028697 | 0.00125758 | 3.46431381 |
| NAV1       | NM_020443.2 | NAV1       | 1 Homo sapiens POMFIL3; KIA      | 0.0029968  | 0.00773616 | 3.45409079 |
| LOC644761  | XR_019390.1 | LOC644761  | PREDICTED: Homo sapiens n        | 1.38E-05   | 0.00013987 | 3.43561275 |
| SOCS5      | NM_014011.4 | SOCS5      | 2 Homo sapiens CIS6; SOCS-5      | 0.01841299 | 0.03226578 | 3.37045041 |
| ATG4A      | NM_178271.1 | ATG4A      | Homo sapiens APG4A; AULT2        | 2.17E-06   | 3.94E-05   | 3.36271284 |
| PRICKLE1   | NM_153026.1 | PRICKLE1   | 12 Homo sapiens MGC138902; I     | 0.00034416 | 0.00144862 | 3.33910305 |
| NKIRAS2    | NM_00100134 | NKIRAS2    | 17 Homo sapiens KBRAS2; MGC      | 7.11E-05   | 0.00045685 | 3.32549125 |
|            | Hs.576106   | HS.576106  | 10 Homo sapiens cDNA FLJ4005     | 2.45E-05   | 0.00021499 | 3.3017224  |
| KIAA0427   | NM_014772.1 | KIAA0427   | 18 Homo sapiens Gm672            | 4.84E-05   | 0.00035087 | 3.29783364 |
| SERPINA5   | NM_000624.3 | SERPINA5   | 14 Homo sapiens PROC1; PAI3;     | 0.00010346 | 0.00059272 | 3.29284938 |
| MAN2A2     | NM_006122.2 | MAN2A2     | 15 Homo sapiens MANA2X           | 0.0023991  | 0.00649723 | 3.27250685 |
| PTPN18     | NM_014369.2 | PTPN18     | 2 Homo sapiens BDP1              | 0.01169573 | 0.02273054 | 3.25631337 |
| GCH1       | NM_000161.2 | GCH1       | 14 Homo sapiens DYT5; GTP-CH     | 0.00612138 | 0.01358807 | 3.23188253 |
| PIGQ       | NM_004204.2 | PIGQ       | 16 Homo sapiens GPI1; c407A1     | 2.18E-05   | 0.0001984  | 3.22930727 |
| ZMAT5      | NM_019103.2 | ZMAT5      | 22 Homo sapiens zinc finger, ma  | 2.25E-06   | 4.05E-05   | 3.22666927 |
| TBC1D5     | NM_014744.1 | TBC1D5     | 3 Homo sapiens KIAA0210          | 0.01264555 | 0.0241405  | 3.2029478  |
| TCTA       | NM_022171.1 | TCTA       | 3 Homo sapiens T-cell leukemia   | 6.17E-06   | 8.01E-05   | 3.19648977 |
| KIAA0319L  | NM_182686.1 | KIAA0319L  | 1 Homo sapiens PP791; RP4-7      | 0.01301354 | 0.02467827 | 3.18046815 |
| SNORA79    | NR_003021.2 | SNORA79    | 14 Homo sapiens ACA65            | 0.00011589 | 0.00064128 | 3.17770629 |
| FLJ32810   | XM_926804.1 | FLJ32810   | PREDICTED: Homo sapiens h        | 0.00782179 | 0.01649665 | 3.14186943 |
| LOC727773  | XM_930899.1 | LOC727773  | 2 PREDICTED: Homo sapiens s      | 0.01017941 | 0.02037007 | 3.1387061  |
| SLC43A3    | NM_017611.2 | SLC43A3    | 11 Homo sapiens FOAP-13; EEG     | 0.02385609 | 0.03962525 | 3.1273644  |
| ZNF548     | NM_152909.2 | ZNF548     | 19 Homo sapiens FLJ32932         | 0.02648803 | 0.04288914 | 3.11575041 |
| CR2        | NM_00100665 | CR2        | 1 Homo sapiens CD21; SLEB9;      | 0.00100222 | 0.00329565 | 3.09759823 |
| HTR7       | NM_000872.3 | HTR7       | 10 Homo sapiens 5-HT7            | 0.00020822 | 0.00099294 | 3.09675203 |
| RAB11B     | NM_004218.1 | RAB11B     | 19 Homo sapiens H-YPT3; MGC1     | 0.01467205 | 0.02709529 | 3.09373456 |
| FAM83B     | NM_00101087 | FAM83B     | 6 Homo sapiens FLJ30642; MG      | 0.00128837 | 0.00401664 | 3.08547742 |
| CD24       | NM_013230.2 | CD24       | Homo sapiens CD24A               | 1.43E-09   | 4.43E-07   | 3.07972204 |
| WDHD1      | NM_00100839 | WDHD1      | 14 Homo sapiens AND-1            | 0.01168039 | 0.02271292 | 3.07597555 |
| LOC284293  | XM_209104.2 | LOC284293  | 18 PREDICTED: Homo sapiens s     | 0.00072407 | 0.00257078 | 3.05427353 |
| LOC730525  | NM_199327.1 | LOC730525  | PREDICTED: Homo sapiens h        | 0.00897352 | 0.0184147  | 3.05056564 |
| MAN1A1     | NM_005907.2 | MAN1A1     | 6 Homo sapiens MAN9; HUMM:       | 2.32E-06   | 4.11E-05   | 3.02742586 |
| ADAT2      | NM_182503.2 | ADAT2      | 6 Homo sapiens TAD2; dJ20N2      | 0.00033669 | 0.00142435 | 3.01965937 |
| CLDN23     | NM_194284.1 | CLDN23     | 8 Homo sapiens CLDNL; hCG1       | 5.46E-06   | 7.38E-05   | 2.99737474 |
| GDPD5      | NM_030792.4 | GDPD5      | 11 Homo sapiens PP1665; GDE2     | 1.11E-05   | 0.00011914 | 2.97216968 |
| FAM43A     | NM_153690.4 | FAM43A     | 3 Homo sapiens FLJ90022          | 4.83E-07   | 1.45E-05   | 2.94936327 |
| SGK        | NM_005627.2 | SGK        | 6 Homo sapiens SGK1              | 2.91E-09   | 6.88E-07   | 2.94834233 |
| SUSD3      | NM_145006.2 | SUSD3      | 9 Homo sapiens MGC26847          | 7.23E-05   | 0.00046091 | 2.94542189 |
| HIST1H4K   | NM_003541.2 | HIST1H4K   | 6 Homo sapiens dJ160A22.1; H     | 0.00348256 | 0.0087028  | 2.94130813 |
| HOXC8      | NM_022658.3 | HOXC8      | 12 Homo sapiens HOX3; HOX3A      | 0.00232443 | 0.00633448 | 2.93537271 |
| KIF13B     | NM_015254.2 | KIF13B     | 8 Homo sapiens KIAA0639; GA      | 6.29E-05   | 0.00041745 | 2.92910701 |
| NCRNA00092 | NR_024129.1 | NCRNA00092 | 9 Homo sapiens non-protein cc    | 0.00096691 | 0.00320281 | 2.92906905 |
| TRAPPC2P1  | NR_002166.1 | TRAPPC2P1  | 19 Homo sapiens SEDLP1; MIP-     | 0.0011014  | 0.00355825 | 2.91751475 |
| RNFT1      | NM_016125.2 | RNFT1      | 17 Homo sapiens PTD016; MGC      | 1.50E-06   | 3.05E-05   | 2.90719807 |
| OGDHL      | NM_018245.1 | OGDHL      | 10 Homo sapiens oxoglutarate d   | 4.01E-07   | 1.27E-05   | 2.90342124 |
| PCIF1      | NM_022104.3 | PCIF1      | 20 Homo sapiens PCIF1            | 0.00203089 | 0.00571066 | 2.89707854 |
| U2AF1L4    | NM_144987.1 | U2AF1L4    | 19 Homo sapiens U2AF1L3; U2a     | 0.000759   | 0.00265748 | 2.89509175 |
| SH3BGR2    | NM_031469.1 | SH3BGR2    | 6 Homo sapiens FLJ90025          | 6.41E-08   | 4.15E-06   | 2.89178575 |

## 2.0 Upreg

|           |             |           |    |                            |            |            |            |
|-----------|-------------|-----------|----|----------------------------|------------|------------|------------|
| RUNDC3B   | NM_138290.1 | RUNDC3B   | 7  | Homo sapiens RPIP9; RPIB9; | 4.38E-06   | 6.34E-05   | 2.88820909 |
| TMEM25    | NM_032780.2 | TMEM25    | 11 | Homo sapiens FLJ14399      | 0.00107812 | 0.00349658 | 2.88361746 |
| ELOVL3    | NM_152310.1 | ELOVL3    | 10 | Homo sapiens CIG30; CIG-30 | 2.08E-07   | 8.40E-06   | 2.88053294 |
| TMEM80    | XM_938671.1 | TMEM80    |    | PREDICTED: Homo sapiens t  | 0.00538295 | 0.01224145 | 2.87943137 |
| TMCO4     | NM_181719.2 | TMCO4     | 1  | Homo sapiens RP5-1056L3.6  | 0.01121281 | 0.02198066 | 2.87261639 |
| HPSE      | NM_006665.2 | HPSE      | 4  | Homo sapiens HPA; HSE1; H  | 4.19E-05   | 0.00031765 | 2.86953755 |
| ATP6AP1L  | NM_00101797 | ATP6AP1L  | 5  | Homo sapiens MGC138396     | 4.77E-06   | 6.67E-05   | 2.86946032 |
| LFNG      | NM_00104016 | LFNG      | 7  | Homo sapiens SCDO3         | 2.26E-06   | 4.06E-05   | 2.85270349 |
| ZXDB      | NM_007157.3 | ZXDB      |    | Homo sapiens dJ83L6.1      | 0.0004213  | 0.00169393 | 2.83781999 |
| CSPG4     | NM_001897.3 | CSPG4     | 15 | Homo sapiens MSK16; MCSP   | 8.13E-05   | 0.00049856 | 2.83380627 |
| CRLF1     | NM_004750.2 | CRLF1     | 19 | Homo sapiens CISS; CISS1;  | 1.76E-07   | 7.43E-06   | 2.83021587 |
| SGK1      | NM_005627.3 | SGK1      | 6  | Homo sapiens SGK           | 1.97E-08   | 2.02E-06   | 2.82448689 |
| RALGPS1   | NM_014636.1 | RALGPS1   | 9  | Homo sapiens KIAA0351; RA  | 7.93E-05   | 0.00049227 | 2.81063737 |
| CCS       | XM_938909.1 | CCS       |    | PREDICTED: Homo sapiens c  | 1.07E-06   | 2.42E-05   | 2.79456126 |
| SLC25A21  | NM_030631.1 | SLC25A21  | 14 | Homo sapiens MGC126570; C  | 0.00029006 | 0.00126501 | 2.78648117 |
| DAB2      | NM_001343.1 | DAB2      | 5  | Homo sapiens FLJ26626; DOB | 0.00154388 | 0.00464532 | 2.78568409 |
| XKR8      | NM_018053.2 | XKR8      | 1  | Homo sapiens XRG8; FLJ103  | 0.00043511 | 0.00173661 | 2.7785914  |
| SCARNA11  | NR_003012.1 | SCARNA11  | 12 | Homo sapiens ACA57         | 8.59E-09   | 1.30E-06   | 2.76318493 |
| CHURC1    | NM_145165.2 | CHURC1    | 14 | Homo sapiens FLJ33064; chc | 9.51E-08   | 5.22E-06   | 2.75953596 |
| FOXD4L1   | NM_012184.3 | FOXD4L1   | 2  | Homo sapiens bA395L14.1    | 3.58E-05   | 0.00028376 | 2.74989459 |
| FZD3      | NM_017412.2 | FZD3      | 8  | Homo sapiens hFz3; Fz-3    | 0.00217044 | 0.00599755 | 2.74663223 |
|           | Hs.522924   | HS.522924 | 10 | Homo sapiens cDNA FLJ4316  | 0.00044631 | 0.00176703 | 2.74184659 |
| TPCN2     | NM_139075.1 | TPCN2     |    | Homo sapiens FLJ41094; TPC | 0.01319609 | 0.02492009 | 2.74164457 |
| OPTN      | NM_00100821 | OPTN      | 10 | Homo sapiens FIP2; HYPL; N | 2.32E-07   | 8.96E-06   | 2.74101731 |
| GEM       | NM_005261.2 | GEM       | 8  | Homo sapiens KIR; MGC2629  | 0.00014499 | 0.00075505 | 2.73698747 |
| ADCK5     | NM_174922.3 | ADCK5     | 8  | Homo sapiens MGC126708; I  | 4.95E-06   | 6.84E-05   | 2.73665522 |
| ZNF354A   | NM_005649.2 | ZNF354A   | 5  | Homo sapiens EZNF; TCF17;  | 0.0023903  | 0.00647502 | 2.73321813 |
| GALNT5    | NM_014568.1 | GALNT5    | 2  | Homo sapiens MGC165041; C  | 0.01731164 | 0.03076241 | 2.73226737 |
| CA11      | NM_001217.3 | CA11      | 19 | Homo sapiens CARP2; CA-RP  | 0.00014297 | 0.00074596 | 2.73094642 |
| C7orf52   | NM_198571.1 | C7ORF52   | 7  | Homo sapiens FLJ39237; DK  | 0.00189922 | 0.0054275  | 2.71821568 |
| MICAL1    | NM_022765.2 | MICAL1    | 6  | Homo sapiens NICAL; DKFZp  | 2.42E-05   | 0.00021305 | 2.70441853 |
| C3orf59   | NM_178496.2 | C3ORF59   | 3  | Homo sapiens chromosome 3  | 0.01349158 | 0.02536791 | 2.70356935 |
| RELL2     | NM_173828.3 | RELL2     | 5  | Homo sapiens RELL2; FLJ905 | 0.00036335 | 0.00150952 | 2.69686453 |
| ETNK2     | NM_018208.1 | ETNK2     | 1  | Homo sapiens FLJ10761; HM  | 8.99E-05   | 0.00053821 | 2.68454981 |
| TFAP2C    | NM_003222.3 | TFAP2C    | 20 | Homo sapiens AP2-GAMMA; T  | 7.89E-07   | 1.95E-05   | 2.68173922 |
| MTSS1     | NM_014751.2 | MTSS1     | 8  | Homo sapiens MIM; KIAA042  | 1.79E-06   | 3.44E-05   | 2.68062445 |
| HOXC4     | NM_014620.2 | HOXC4     | 12 | Homo sapiens cp19; HOX3E;  | 0.00224362 | 0.00615128 | 2.67865464 |
| MPP7      | NM_173496.2 | MPP7      | 10 | Homo sapiens FLJ32798; RP: | 0.00044017 | 0.00174972 | 2.67778479 |
| CD164L2   | NM_207397.1 | CD164L2   | 1  | Homo sapiens UNQ6122       | 0.00499412 | 0.01155794 | 2.67485905 |
| AMH       | NM_000479.2 | AMH       | 19 | Homo sapiens MIF; MIS      | 8.45E-05   | 0.00051412 | 2.67447996 |
| IFT1      | NM_001548.2 | IFT1      | 10 | Homo sapiens RNMS61; IFI-1 | 0.00305175 | 0.00784076 | 2.67210523 |
| DNAJC27   | NM_016544.1 | DNAJC27   | 2  | Homo sapiens RabJS; DKFZp  | 0.00277802 | 0.00730853 | 2.669608   |
| FZD4      | NM_012193.2 | FZD4      | 11 | Homo sapiens FzE4; EVR1; C | 1.50E-07   | 6.75E-06   | 2.66889952 |
| FOXD4     | NM_207305.2 | FOXD4     | 9  | Homo sapiens FOXD4A; MGC   | 5.51E-07   | 1.57E-05   | 2.65172547 |
| ABHD8     | NM_024527.3 | ABHD8     | 19 | Homo sapiens FLJ11743; MG  | 3.67E-06   | 5.63E-05   | 2.62458054 |
| MUC1      | NM_00104439 | MUC1      | 1  | Homo sapiens PENT; PUM; PI | 0.00025145 | 0.00113109 | 2.62453331 |
| PTPN20    | XM_937744.1 | PTPN20    |    | PREDICTED: Homo sapiens p  | 0.0199576  | 0.03441205 | 2.61504122 |
| KISS1R    | NM_032551.3 | KISS1R    | 19 | Homo sapiens HOT7T175; A)  | 1.77E-06   | 3.41E-05   | 2.61383203 |
| CHCHD7    | NM_00101167 | CHCHD7    | 8  | Homo sapiens FLJ40966; MG  | 4.36E-08   | 3.16E-06   | 2.6040121  |
| MLF1IP    | NM_024629.2 | MLF1IP    | 4  | Homo sapiens CENPU; KLIP1  | 0.00027489 | 0.0012169  | 2.60185876 |
| LYPD6     | NM_194317.2 | LYPD6     | 2  | Homo sapiens MGC52057      | 0.00096722 | 0.00320284 | 2.59459702 |
| AP2A1     | NM_014203.2 | AP2A1     | 19 | Homo sapiens CLAPA1; AP2-  | 4.77E-06   | 6.68E-05   | 2.57804436 |
| VAC14     | NM_018052.3 | VAC14     |    | PREDICTED: Homo sapiens V  | 2.46E-05   | 0.00021574 | 2.56892244 |
| SOX12     | NM_006943.2 | SOX12     | 20 | Homo sapiens SOX22         | 0.01128764 | 0.02209547 | 2.56882207 |
| GPR137B   | NM_003272.1 | GPR137B   | 1  | Homo sapiens TM7SF1        | 0.00010511 | 0.00059936 | 2.55938169 |
| PDK3      | NM_005391.1 | PDK3      |    | Homo sapiens pyruvate dehy | 0.00013649 | 0.00071801 | 2.5562195  |
| PLEKHM1   | NM_014798.1 | PLEKHM1   |    | PREDICTED: Homo sapiens p  | 1.14E-05   | 0.00012146 | 2.55571002 |
| MANEAL    | NM_00103174 | MANEAL    | 1  | Homo sapiens RP11-109P14.  | 0.00093644 | 0.0031228  | 2.54273319 |
| CHMP6     | NM_024591.3 | CHMP6     |    | PREDICTED: Homo sapiens c  | 0.00606592 | 0.01349251 | 2.53437945 |
| C4orf33   | NM_173487.1 | C4ORF33   | 4  | Homo sapiens FLJ33703      | 5.10E-05   | 0.00036177 | 2.52940546 |
| GRAMD3    | NM_023927.1 | GRAMD3    | 5  | Homo sapiens NS3TP2; FLJ2  | 0.00013177 | 0.00070303 | 2.50516153 |
| TMEM22    | NM_025246.1 | TMEM22    | 3  | Homo sapiens DKFZp564K24   | 0.00669585 | 0.01461255 | 2.50486752 |
| RND3      | NM_005168.3 | RND3      | 2  | Homo sapiens RhoE; Rho8; r | 2.18E-08   | 2.09E-06   | 2.50379829 |
| METTL9    | NM_00107718 | METTL9    | 16 | Homo sapiens PAP1; FLJ2191 | 0.02507231 | 0.04114235 | 2.49924415 |
| FBXO17    | NM_148169.1 | FBXO17    | 19 | Homo sapiens FBXO26; MGC   | 8.23E-05   | 0.00050383 | 2.49915991 |
| LOC645448 | XM_928480.1 | LOC645448 | 9  | PREDICTED: Homo sapiens s  | 0.02615327 | 0.04254359 | 2.49772281 |
| NAV3      | NM_014903.3 | NAV3      | 12 | Homo sapiens unc53H3; STE  | 0.00044776 | 0.0017702  | 2.49300285 |
| TTC13     | XM_939087.1 | TTC13     | 1  | Homo sapiens FLJ22584      | 0.00058165 | 0.00217979 | 2.4895637  |
| JUN       | NM_002228.3 | JUN       | 1  | Homo sapiens AP1; c-Jun    | 5.89E-10   | 2.46E-07   | 2.48565745 |
| MCM3APAS  | NR_002776.1 | MCM3APAS  | 21 | Homo sapiens C21orf85; FLJ | 0.02058691 | 0.03524551 | 2.48565365 |

## 2.0 Upreg

|             |             |              |    |                             |            |            |            |
|-------------|-------------|--------------|----|-----------------------------|------------|------------|------------|
| PCBD2       | NM_032151.3 | PCBD2        | 5  | Homo sapiens DCOH2; DCOH2   | 0.01822336 | 0.03200055 | 2.48433052 |
| MMP15       | NM_002428.2 | MMP15        | 16 | Homo sapiens MTMMP2; MT2    | 0.00042466 | 0.00170489 | 2.48022571 |
| LMO2        | NM_005574.2 | LMO2         | 11 | Homo sapiens TTG2; RBTN2;   | 0.00217149 | 0.00599741 | 2.4688272  |
| GSTT2       | NM_00108084 | GSTT2        |    | Homo sapiens glutathione S- | 9.26E-06   | 0.00010575 | 2.46580488 |
| EGFR        | NM_201284.1 | EGFR         | 7  | Homo sapiens ERBB1; HER1;   | 0.01259079 | 0.02406131 | 2.45902788 |
| C14orf21    | NM_174913.1 | C14ORF21     | 14 | Homo sapiens KIAA2021       | 0.01638893 | 0.02955284 | 2.45277145 |
| HCP5        | NM_006674.2 | HCP5         | 6  | Homo sapiens P5-1; D6S265   | 1.49E-08   | 1.85E-06   | 2.45143457 |
| ZNF177      | NM_003451.1 | ZNF177       | 19 | Homo sapiens PIGX           | 0.03088506 | 0.04815074 | 2.44413758 |
| C11orf60    | NM_020153.2 | C11ORF60     | 11 | Homo sapiens C11orf2; FLJ2  | 0.00175991 | 0.00513744 | 2.44402645 |
| LOC10013377 | XM_00171384 | LOC100133770 |    | PREDICTED: Homo sapiens s   | 0.02003671 | 0.0344992  | 2.43378532 |
| LOC648526   | XM_937579.1 | LOC648526    |    | PREDICTED: Homo sapiens s   | 2.83E-08   | 2.33E-06   | 2.42578123 |
| TMEM2       | NM_013390.1 | TMEM2        | 9  | Homo sapiens transmembran   | 9.23E-06   | 0.0001056  | 2.42510952 |
| GM2A        | NM_000405.3 | GM2A         | 5  | Homo sapiens SAP-3          | 0.00014998 | 0.00077397 | 2.41973344 |
| ARL3        | NM_004311.2 | ARL3         | 10 | Homo sapiens ARL3           | 7.09E-08   | 4.35E-06   | 2.41804124 |
| MYO1D       | NM_015194.1 | MYO1D        | 17 | Homo sapiens KIAA0727; my   | 6.87E-07   | 1.82E-05   | 2.41465752 |
| NEU1        | NM_000434.2 | NEU1         | 6  | Homo sapiens NEU; SIAL1     | 3.34E-09   | 7.57E-07   | 2.40882075 |
| LOC339352   | XR_019601.2 | LOC339352    |    | PREDICTED: Homo sapiens n   | 0.00021248 | 0.00100622 | 2.39954871 |
| PNPLA8      | NM_015723.2 | PNPLA8       | 7  | Homo sapiens IPLA2G; IPLA2  | 5.16E-05   | 0.00036487 | 2.39407906 |
| SGSM1       | XM_943783.1 | SGSM1        | 22 | Homo sapiens MGC133298; I   | 0.0011179  | 0.00359766 | 2.39396386 |
| TNFSF9      | NM_003811.2 | TNFSF9       | 19 | Homo sapiens 4-1BB-L        | 2.21E-05   | 0.00019969 | 2.3910442  |
| VASH1       | NM_014909.2 | VASH1        | 14 | Homo sapiens KIAA1036       | 7.00E-07   | 1.83E-05   | 2.38741638 |
| C9orf169    | NM_199001.1 | C9ORF169     |    | Homo sapiens chromosome 9   | 1.86E-06   | 3.51E-05   | 2.38204588 |
| SLC35E3     | NM_018656.2 | SLC35E3      | 12 | Homo sapiens BLOV1          | 1.69E-05   | 0.00016367 | 2.37701575 |
| MPP1        | NM_002436.2 | MPP1         |    | Homo sapiens AAG12; EMP5    | 2.78E-06   | 4.64E-05   | 2.37656247 |
| MT1G        | NM_005950.1 | MT1G         | 16 | Homo sapiens MT1; MT1K; M   | 8.65E-10   | 3.13E-07   | 2.37474616 |
| JAK2        | NM_004972.2 | JAK2         | 9  | Homo sapiens JTK10          | 0.00656776 | 0.01438211 | 2.37101175 |
| KCNS3       | NM_002252.3 | KCNS3        | 2  | Homo sapiens MGC9481; KV    | 6.97E-06   | 8.78E-05   | 2.36588828 |
| MGC39900    | XM_936687.1 | MGC39900     |    | PREDICTED: Homo sapiens h   | 3.57E-08   | 2.73E-06   | 2.35524918 |
| BMPR2       | NM_001204.5 | BMPR2        | 2  | Homo sapiens BRK-3; BMPR2   | 0.0009747  | 0.00322172 | 2.35296208 |
| CAPN5       | NM_004055.3 | CAPN5        | 11 | Homo sapiens HTRA3; FLJ46   | 3.49E-06   | 5.43E-05   | 2.34429672 |
| NRGN        | NM_006176.1 | NRGN         | 11 | Homo sapiens RC3; hng       | 1.01E-08   | 1.42E-06   | 2.32563247 |
| CYR61       | NM_001554.3 | CYR61        | 1  | Homo sapiens CCN1; IGFBP1   | 5.15E-09   | 9.48E-07   | 2.31990782 |
| CYP2R1      | NM_024514.4 | CYP2R1       | 11 | Homo sapiens MGC4663        | 1.09E-06   | 2.43E-05   | 2.31727943 |
| CTAGE5      | NM_203356.1 | CTAGE5       | 14 | Homo sapiens MEA6; MGEA;    | 0.00091734 | 0.00307896 | 2.31379061 |
| CNOT6L      | NM_144571.2 | CNOT6L       | 4  | Homo sapiens CCR4b          | 0.01868257 | 0.03262245 | 2.31362342 |
| ARHGAP29    | NM_004815.2 | ARHGAP29     | 1  | Homo sapiens RP11-255E17.   | 0.00030993 | 0.00133347 | 2.3113339  |
| ST7OT2      | NR_002331.1 | ST7OT2       | 7  | Homo sapiens ST7 overlappir | 0.02026813 | 0.03479843 | 2.31120374 |
| LOC732371   | XM_941758.1 | LOC732371    |    | PREDICTED: Homo sapiens s   | 0.00148618 | 0.00451294 | 2.31029319 |
| ISL1        | NM_002202.1 | ISL1         | 5  | Homo sapiens Isl-1          | 2.02E-05   | 0.00018705 | 2.30926991 |
| AGTPBP1     | NM_015239.1 | AGTPBP1      | 9  | Homo sapiens NNA1; KIAA10   | 0.00195774 | 0.00555094 | 2.30477119 |
| SNORA31     | NR_002967.1 | SNORA31      | 13 | Homo sapiens ACA31          | 0.02183614 | 0.03693622 | 2.30231854 |
| MICA        | NM_000247.1 | MICA         | 6  | Homo sapiens PERB11.1; MG   | 3.61E-07   | 1.19E-05   | 2.30019425 |
| CORIN       | NM_006587.2 | CORIN        | 4  | Homo sapiens Lrp4; TMPRSS   | 3.07E-07   | 1.05E-05   | 2.29107506 |
| C5orf5      | NM_016603.1 | C5ORF5       | 5  | Homo sapiens KHCHP; MGC5    | 2.19E-05   | 0.00019894 | 2.28268903 |
| TM2D2       | NM_078473.2 | TM2D2        | 8  | Homo sapiens MGC125814; I   | 1.44E-05   | 0.00014397 | 2.27331494 |
| GOSR1       | NM_004871.2 | GOSR1        | 17 | Homo sapiens GOS-28; GOS    | 0.02331404 | 0.03889132 | 2.27310161 |
| SORL1       | NM_003105.3 | SORL1        | 11 | Homo sapiens LR11; LRP9; S  | 7.42E-06   | 9.11E-05   | 2.27039005 |
| ISG20       | NM_002201.4 | ISG20        | 15 | Homo sapiens CD25; HEM45    | 0.00583459 | 0.01306891 | 2.26850642 |
| SP100       | NM_00108039 | SP100        | 2  | Homo sapiens DKFZp686E07    | 0.0003993  | 0.00162168 | 2.26581944 |
| RN7SK       | NR_001445.1 | RN7SK        | 6  | Homo sapiens 7SK            | 6.21E-08   | 4.07E-06   | 2.26554567 |
| DIP2A       | NM_206889.1 | DIP2A        | 21 | Homo sapiens DIP2; C21orf1  | 6.89E-06   | 8.73E-05   | 2.2649048  |
| SNORD13     | Hs.583806   | SNORD13      | 8  | Homo sapiens U13            | 1.94E-08   | 2.01E-06   | 2.25948218 |
| C21orf2     | NM_004928.1 | C21ORF2      | 21 | Homo sapiens A2; YF5        | 0.00099806 | 0.00328594 | 2.25898119 |
| SNORD3A     | NR_006880.1 | SNORD3A      | 17 | Homo sapiens U3             | 3.11E-09   | 7.19E-07   | 2.2551573  |
| CNTD2       | NM_024877.1 | CNTD2        | 19 | Homo sapiens FLJ13265       | 0.00841028 | 0.01749339 | 2.25177548 |
| PCDH15      | NM_033056.2 | PCDH15       | 10 | Homo sapiens USH1H; DFNB    | 0.0171901  | 0.03059646 | 2.24855177 |
| CSPG4LYP2   | NR_002194.1 | CSPG4LYP2    |    | Homo sapiens chondroitin su | 0.00764971 | 0.01621554 | 2.2481304  |
| LOC652458   | XM_941907.1 | LOC652458    |    | PREDICTED: Homo sapiens s   | 0.02492596 | 0.04099506 | 2.24756738 |
| C1orf53     | NM_00102459 | C1ORF53      | 1  | Homo sapiens chromosome 1   | 2.82E-07   | 1.00E-05   | 2.24399788 |
| SCNN1D      | NM_002978.2 | SCNN1D       | 1  | Homo sapiens SCNED; ENaC    | 0.00012581 | 0.00067991 | 2.2405168  |
| PLD1        | NM_002662.2 | PLD1         | 3  | Homo sapiens phospholipase  | 0.00701176 | 0.0151258  | 2.24002821 |
| PRPH        | NM_006262.3 | PRPH         | 12 | Homo sapiens PRPH1; NEF4    | 4.91E-07   | 1.46E-05   | 2.23394371 |
| FAM71E1     | NM_138411.1 | FAM71E1      | 19 | Homo sapiens FLJ27522; FLJ  | 1.44E-09   | 4.36E-07   | 2.23146029 |
| LPXN        | NM_004811.1 | LPXN         | 11 | Homo sapiens LDPL           | 0.00065524 | 0.00238165 | 2.23021922 |
| SLC30A1     | NM_021194.2 | SLC30A1      | 1  | Homo sapiens ZNT1; ZRC1     | 8.27E-06   | 9.79E-05   | 2.22328267 |
| TBC1D2      | NM_018421.2 | TBC1D2       | 9  | Homo sapiens FLJ10702; DK   | 0.00035943 | 0.00149723 | 2.21401656 |
| C20orf108   | NM_080821.1 | C20ORF108    | 20 | Homo sapiens DKFZP434A11    | 1.80E-08   | 1.94E-06   | 2.20277983 |
| CYB5R1      | NM_016243.2 | CYB5R1       | 1  | Homo sapiens B5R.1; NQO3/   | 2.94E-06   | 4.81E-05   | 2.19776359 |
| FLJ10986    | NM_018291.2 | FLJ10986     | 1  | Homo sapiens RP11-242B9.1   | 6.03E-05   | 0.00040513 | 2.18621867 |
| TMEM50A     | NM_014313.2 | TMEM50A      | 1  | Homo sapiens SMP1; RP11-3   | 3.45E-05   | 0.00027484 | 2.18406759 |

## 2.0 Upreg

|           |             |           |    |                           |                 |            |            |            |
|-----------|-------------|-----------|----|---------------------------|-----------------|------------|------------|------------|
| IRX3      | NM_024336.1 | IRX3      | 16 | Homo sapiens              | IRX-1           | 7.86E-07   | 1.95E-05   | 2.18336742 |
| LOC653166 | XM_926309.1 | LOC653166 | 17 | PREDICTED: Homo sapiens s |                 | 0.02301543 | 0.03848772 | 2.17623283 |
| CLN5      | NM_006493.1 | CLN5      | 13 | Homo sapiens              | FLJ90628; NC    | 0.0019263  | 0.00548325 | 2.17485281 |
| RAB24     | NM_00103167 | RAB24     | 5  | Homo sapiens              | RAB24; memb     | 6.81E-08   | 4.23E-06   | 2.17081199 |
| RNU4-2    | NR_003137.2 | RNU4-2    |    | Homo sapiens              | RNA, U4 small   | 6.11E-06   | 7.95E-05   | 2.17004348 |
| GADD45B   | NM_015675.1 | GADD45B   | 19 | Homo sapiens              | MYD118; DKF     | 3.89E-05   | 0.00029999 | 2.16327082 |
| FLJ21865  | NM_022759.1 | FLJ21865  | 17 | Homo sapiens              | DKFZp434P17     | 0.00023438 | 0.00107886 | 2.15934264 |
| LASS5     | NM_147190.1 | LASS5     | 12 | Homo sapiens              | Trh4; MGC454    | 1.49E-05   | 0.00014784 | 2.14733978 |
| DAAM1     | NM_014992.1 | DAAM1     | 14 | Homo sapiens              | FLJ41657; KIA   | 7.83E-05   | 0.00048864 | 2.13318411 |
| OSMR      | NM_003999.1 | OSMR      | 5  | Homo sapiens              | OSMRB; MGC7     | 0.02499031 | 0.04105739 | 2.13235242 |
| GLDN      | NM_181789.1 | GLDN      | 15 | Homo sapiens              | CRG-L2; UNC-    | 1.73E-05   | 0.00016613 | 2.12713669 |
| KBTBD7    | NM_032138.3 | KBTBD7    | 13 | Homo sapiens              | DKFZP434E23     | 0.00341236 | 0.00855096 | 2.12463913 |
| MOCS1     | NM_138928.1 | MOCS1     | 6  | Homo sapiens              | MOCS1B; MIG     | 0.00060692 | 0.0022535  | 2.1219503  |
| ZBTB42    | NM_00113760 | ZBTB42    | 14 | Homo sapiens              | zinc finger anc | 2.89E-05   | 0.0002427  | 2.11991552 |
| ACAD10    | NM_025247.3 | ACAD10    | 12 | Homo sapiens              | MGC5601         | 9.81E-05   | 0.00057148 | 2.11644193 |
| TUFT1     | NM_020127.1 | TUFT1     | 1  | Homo sapiens              | tuftelin 1 (TUF | 2.99E-08   | 2.41E-06   | 2.11080753 |
| DENND1A   | NM_020946.1 | DENND1A   | 9  | Homo sapiens              | RP11-230L22.    | 0.00920736 | 0.01879518 | 2.10813785 |
| CHD2      | NM_001271.1 | CHD2      | 15 | Homo sapiens              | DKFZp781D17     | 0.00122216 | 0.00384776 | 2.10813699 |
|           | Hs.326560   | HS.326560 |    | PREDICTED: Homo sapiens L |                 | 0.00012167 | 0.00066313 | 2.10550767 |
| LOC441019 | XM_498969.2 | LOC441019 | 4  | PREDICTED: Homo sapiens h |                 | 9.30E-07   | 2.19E-05   | 2.10483268 |
| UFSP1     | NM_00101507 | UFSP1     | 7  | Homo sapiens              | UFM1-specific   | 0.00106361 | 0.00345571 | 2.10219811 |
| ST3GAL5   | NM_003896.2 | ST3GAL5   | 2  | Homo sapiens              | SIAT9; ST3Ga    | 1.39E-06   | 2.91E-05   | 2.09866714 |
| PPP1R12C  | NM_017607.1 | PPP1R12C  | 19 | Homo sapiens              | p84; DKFZp43    | 0.00020349 | 0.00097381 | 2.09550921 |
| FAH       | NM_000137.1 | FAH       | 15 | Homo sapiens              | fumarylacetoa   | 0.0211219  | 0.03600263 | 2.08298813 |
| MLF1      | NM_022443.2 | MLF1      | 3  | Homo sapiens              | myeloid leukei  | 3.49E-06   | 5.42E-05   | 2.07886961 |
| AKAP13    | NM_007200.3 | AKAP13    | 15 | Homo sapiens              | HA-3; FLJ1195   | 4.22E-05   | 0.00031939 | 2.07804002 |
| LOC729776 | Hs.535844   | LOC729776 | 6  | PREDICTED: Homo sapiens h |                 | 4.93E-05   | 0.00035417 | 2.07753427 |
| VGF       | NM_003378.2 | VGF       | 7  | Homo sapiens              | VGF nerve gro   | 1.40E-09   | 4.46E-07   | 2.07641015 |
| PARM1     | NM_015393.2 | PARM1     | 4  | Homo sapiens              | prostate andrc  | 6.32E-09   | 1.06E-06   | 2.07347694 |
| LOC645166 | XM_00112944 | LOC645166 | 1  | PREDICTED: Homo sapiens s |                 | 5.67E-09   | 9.63E-07   | 2.07279902 |
| ADAMTSL5  | NM_213604.1 | ADAMTSL5  | 19 | Homo sapiens              | THSD6           | 0.00045169 | 0.00178183 | 2.07193936 |
| FRMD3     | NM_174938.3 | FRMD3     | 9  | Homo sapiens              | MGC20553; EI    | 0.01593464 | 0.02888701 | 2.0711046  |
| CSAD      | NM_015989.3 | CSAD      | 12 | Homo sapiens              | PCAP; MGC111    | 3.06E-05   | 0.00025302 | 2.06746952 |
| MYOM2     | NM_003970.1 | MYOM2     | 8  | Homo sapiens              | TTNAP           | 0.00314204 | 0.0080253  | 2.06737739 |
| TMEM45A   | NM_018004.1 | TMEM45A   | 3  | Homo sapiens              | DERP7; FLJ10    | 1.23E-05   | 0.00012842 | 2.06708011 |
| CRIP2     | NM_001312.2 | CRIP2     | 14 | Homo sapiens              | CRP2; CRIP; E   | 8.63E-08   | 4.93E-06   | 2.06276132 |
| ANGPTL4   | NM_00103966 | ANGPTL4   | 19 | Homo sapiens              | HFARP; ANGPT    | 2.01E-05   | 0.00018629 | 2.05643354 |
| SUSD2     | NM_019601.3 | SUSD2     | 22 | Homo sapiens              | BK65A6.2; FL    | 2.00E-05   | 0.00018605 | 2.05642799 |
| EXPH5     | NM_015065.1 | EXPH5     | 11 | Homo sapiens              | SLAC2-B; KIA    | 0.00756831 | 0.01607433 | 2.05520284 |
| LOC388588 | XM_946205.1 | LOC388588 | 1  | PREDICTED: Homo sapiens h |                 | 4.27E-05   | 0.00032212 | 2.05422335 |
| SLC35F3   | NM_173508.1 | SLC35F3   | 1  | Homo sapiens              | FLJ37712        | 0.00441936 | 0.01048682 | 2.0535939  |
| SLCO1B3   | NM_019844.1 | SLCO1B3   | 12 | Homo sapiens              | LST-3TM13; S    | 0.00018009 | 0.00088883 | 2.0489564  |
| CKMT1A    | NM_00101500 | CKMT1A    | 15 | Homo sapiens              | UMTCK; CKMT     | 3.92E-08   | 2.92E-06   | 2.04783922 |
| FAM173B   | NM_199133.1 | FAM173B   | 5  | Homo sapiens              | FLJ20667        | 0.00024912 | 0.00112577 | 2.0430279  |
| LAMB2     | NM_002292.2 | LAMB2     | 3  | Homo sapiens              | LAMS            | 8.40E-07   | 2.04E-05   | 2.04098489 |
| FAM46B    | NM_052943.2 | FAM46B    | 1  | Homo sapiens              | MGC16491; M     | 4.86E-07   | 1.46E-05   | 2.04089797 |
| NHEDC2    | XM_933390.1 | NHEDC2    | 4  | Homo sapiens              | FLJ23984; NH    | 0.00680977 | 0.0148195  | 2.03977792 |
| IFI6      | NM_002038.2 | IFI6      | 1  | Homo sapiens              | IFI-6-16; 6-16  | 3.45E-10   | 1.70E-07   | 2.03308705 |
| SLC6A9    | NM_201649.2 | SLC6A9    | 1  | Homo sapiens              | DKFZp547A11     | 0.0070691  | 0.01522532 | 2.03206322 |
| PTH2      | NM_178449.2 | PTH2      | 19 | Homo sapiens              | parathyroid hc  | 0.00522577 | 0.01197168 | 2.03033397 |
| MT1F      | NM_005949.1 | MT1F      | 16 | Homo sapiens              | MT1; MGC327     | 7.40E-10   | 2.77E-07   | 2.02406753 |
| FSTL3     | NM_005860.1 | FSTL3     | 19 | Homo sapiens              | FLRG; FSRP      | 0.00013592 | 0.00071567 | 2.01309602 |
| TSPAN13   | NM_014399.3 | TSPAN13   | 7  | Homo sapiens              | FLJ22934; NE    | 3.42E-10   | 1.77E-07   | 2.01307732 |
| EXT1      | NM_000127.2 | EXT1      | 8  | Homo sapiens              | ttv; EXT        | 6.38E-07   | 1.74E-05   | 2.01144263 |
| GRIN1     | NM_000832.5 | GRIN1     | 9  | Homo sapiens              | NMDAR1; NMD     | 2.50E-07   | 9.25E-06   | 2.011252   |
| ZNF227    | NM_182490.1 | ZNF227    | 19 | Homo sapiens              | zinc finger pro | 0.0131503  | 0.02485521 | 2.01024625 |
| C14orf133 | NM_022067.2 | C14ORF133 | 14 | Homo sapiens              | FLJ12707        | 0.00465587 | 0.0109358  | 2.00807602 |
| RRAGC     | NM_022157.2 | RRAGC     | 1  | Homo sapiens              | FLJ13311; GTI   | 0.0056393  | 0.01270478 | 2.00334488 |
| C2orf7    | NM_032319.1 | C2ORF7    | 2  | Homo sapiens              | PAP21; MGC11    | 2.19E-05   | 0.0001987  | 2.00103853 |
| SECISBP2L | NM_014701.2 | SECISBP2L | 15 | Homo sapiens              | SECIS binding   | 0.00074138 | 0.00261517 | 1.99985152 |
| C7orf41   | NM_152793.1 | C7ORF41   | 7  | Homo sapiens              | FLJ25903; Ells  | 9.55E-08   | 5.14E-06   | 1.9987279  |
| LOC652097 | XM_941428.1 | LOC652097 |    | PREDICTED: Homo sapiens h |                 | 8.08E-07   | 1.99E-05   | 1.9953209  |
| TRAPPC2   | NM_00101165 | TRAPPC2   |    | Homo sapiens              | hYP38334; TR    | 0.00011634 | 0.0006431  | 1.99268645 |
| PPIL6     | NM_173672.1 | PPIL6     | 6  | Homo sapiens              | bA425D10.6; I   | 0.00023636 | 0.00108434 | 1.98707323 |
| ABHD6     | NM_020676.4 | ABHD6     | 3  | Homo sapiens              | abhydrolase d   | 1.64E-07   | 7.14E-06   | 1.98657809 |
| FKBP1B    | NM_054033.1 | FKBP1B    | 2  | Homo sapiens              | FKBP12.6; FK    | 0.00412107 | 0.00990443 | 1.98187828 |
| HLA-DMA   | NM_006120.2 | HLA-DMA   | 6  | Homo sapiens              | HLADM; RING     | 1.94E-07   | 8.00E-06   | 1.97694213 |
| PNPLA7    | NM_152286.2 | PNPLA7    | 9  | Homo sapiens              | FLJ44279; NTI   | 0.00025967 | 0.00116088 | 1.97357775 |
| C17orf28  | NM_030630.1 | C17ORF28  | 17 | Homo sapiens              | FLJ43526; DM    | 0.00522115 | 0.01196614 | 1.97267921 |
|           | Hs.572495   | HS.572495 | 17 | Homo sapiens              | cDNA clone IM   | 0.02359391 | 0.03926779 | 1.97261785 |

## 2.0 Upreg

|             |             |              |    |                               |            |            |            |
|-------------|-------------|--------------|----|-------------------------------|------------|------------|------------|
| KLK8        | NM_144507.1 | KLK8         | 19 | Homo sapiens NRPN; NP; HN     | 0.01633762 | 0.02948476 | 1.97226573 |
| PPP1R13B    | NM_015316.1 | PPP1R13B     | 14 | Homo sapiens p53BP2-like; p   | 1.92E-05   | 0.00017935 | 1.97035474 |
| LOC644128   | XM_927344.1 | LOC644128    | 8  | PREDICTED: Homo sapiens h     | 0.00144175 | 0.00440385 | 1.96662666 |
| MPP2        | NM_005374.3 | MPP2         | 17 | Homo sapiens DKFZp686J21      | 0.007357   | 0.01572078 | 1.96389491 |
| FAM113A     | NM_022760.3 | FAM113A      | 20 | Homo sapiens C20orf81; bA1    | 9.80E-05   | 0.00057179 | 1.96309206 |
| SUZ12P      | XM_934900.1 | SUZ12P       | 17 | PREDICTED: Homo sapiens s     | 0.01052829 | 0.02090654 | 1.96158653 |
| LOC391692   | XM_373031.3 | LOC391692    | 4  | PREDICTED: Homo sapiens s     | 0.00122056 | 0.00384716 | 1.95584796 |
| GDE1        | NM_016641.3 | GDE1         | 16 | Homo sapiens GDE1; 363E6.     | 1.09E-05   | 0.00011797 | 1.95475085 |
| MEGF6       | NM_001409.3 | MEGF6        | 1  | Homo sapiens KIAA0815; EG     | 0.00206596 | 0.00578085 | 1.95338878 |
| RPL28       | NM_000991.3 | RPL28        | 19 | Homo sapiens FLJ43307         | 2.89E-06   | 4.75E-05   | 1.95262261 |
| TMEM175     | NM_032326.2 | TMEM175      | 4  | Homo sapiens MGC4618          | 3.35E-08   | 2.62E-06   | 1.94642888 |
| CAMTA1      | NM_015215.1 | CAMTA1       | 1  | Homo sapiens KIAA0833         | 5.13E-06   | 7.03E-05   | 1.94482423 |
| CASC5       | NM_144508.2 | CASC5        | 15 | Homo sapiens D40; AF15Q14     | 0.01341211 | 0.02525781 | 1.93816519 |
| ST7L        | NM_138729.2 | ST7L         | 1  | Homo sapiens FLJ11657; FLJ    | 0.00045485 | 0.00179172 | 1.93451205 |
| H2AFV       | NM_138635.2 | H2AFV        | 7  | Homo sapiens MGC1947; H2.     | 0.02157255 | 0.03659287 | 1.93360184 |
| TMEM8       | NM_021259.1 | TMEM8        | 16 | Homo sapiens M83; TMEM6       | 0.00022411 | 0.00104711 | 1.9331523  |
| CDC20B      | NM_152623.1 | CDC20B       | 5  | Homo sapiens FLJ37927; G6'    | 0.00271012 | 0.00715936 | 1.93114692 |
| ING5        | XM_941026.1 | ING5         |    | PREDICTED: Homo sapiens ir    | 0.00099478 | 0.00327712 | 1.9264384  |
| SCARNA16    | NR_003013.1 | SCARNA16     | 17 | Homo sapiens ACA47            | 2.29E-06   | 4.08E-05   | 1.9248001  |
| ACTA2       | NM_001613.1 | ACTA2        | 10 | Homo sapiens ACTSA            | 2.65E-07   | 9.63E-06   | 1.92227404 |
| HS1BP3      | NM_022460.3 | HS1BP3       | 2  | Homo sapiens ETM2; FLJ142.    | 6.94E-07   | 1.83E-05   | 1.92051058 |
| LOC649970   | XM_939056.1 | LOC649970    |    | PREDICTED: Homo sapiens s     | 1.73E-08   | 1.92E-06   | 1.91799012 |
| TLE6        | NM_024760.1 | TLE6         | 19 | Homo sapiens FLJ14009; MG     | 0.00013295 | 0.00070689 | 1.91679311 |
| C9orf45     | NM_030814.4 | C9orf45      | 9  | PREDICTED: Homo sapiens c     | 7.23E-05   | 0.00046096 | 1.91651372 |
| LOC10013357 | XM_00171453 | LOC100133578 |    | PREDICTED: Homo sapiens s     | 3.59E-05   | 0.00028392 | 1.91429945 |
| IIFT20      | NM_174887.2 | IIFT20       | 17 | Homo sapiens intraflagellar t | 0.00044149 | 0.00175306 | 1.9125612  |
| MAP3K12     | NM_006301.2 | MAP3K12      | 12 | Homo sapiens DLK; ZPKP1; z    | 0.00011739 | 0.00064661 | 1.90555913 |
| PTPRU       | NM_005704.3 | PTPRU        | 1  | Homo sapiens GLEPP1; hPTR     | 2.63E-05   | 0.00022745 | 1.89845282 |
| PPP1R14C    | NM_030949.1 | PPP1R14C     | 6  | Homo sapiens KEPI; NY-BR-8    | 1.36E-07   | 6.44E-06   | 1.89531254 |
| NICN1       | NM_032316.2 | NICN1        | 3  | Homo sapiens MGC12936         | 0.00015279 | 0.00078436 | 1.89429614 |
| MTL5        | NM_00103965 | MTL5         | 11 | Homo sapiens TESMIN; MTLT     | 0.00318236 | 0.00810353 | 1.8938739  |
| MOSPD1      | NM_019556.1 | MOSPD1       |    | Homo sapiens DJ473B4          | 1.89E-06   | 3.55E-05   | 1.88613075 |
| UNC13B      | NM_006377.2 | UNC13B       | 9  | Homo sapiens hmunc13; Unc     | 0.01689622 | 0.0302169  | 1.8858212  |
| C12orf4     | NM_020374.2 | C12orf4      | 12 | Homo sapiens FLJ23899; FLJ    | 0.00882553 | 0.01817621 | 1.88262008 |
| NEDD4L      | NM_015277.2 | NEDD4L       | 18 | Homo sapiens FLJ33870; KIA    | 0.00020105 | 0.00096598 | 1.88100851 |
| RGS22       | NM_015668.2 | RGS22        | 8  | Homo sapiens MGC102908; I     | 0.02804187 | 0.04485048 | 1.86988868 |
| MAPT        | NM_016841.2 | MAPT         | 17 | Homo sapiens MTBT2; MAPT      | 3.99E-06   | 5.97E-05   | 1.86917589 |
| LOC653108   | XM_930914.1 | LOC653108    | 21 | PREDICTED: Homo sapiens s     | 0.00301889 | 0.00778392 | 1.86915953 |
| C6orf203    | NM_016487.2 | C6orf203     | 6  | Homo sapiens RP11-59I9.1;     | 1.25E-06   | 2.68E-05   | 1.86452202 |
| FBXO41      | Hs.23158    | FBXO41       | 2  | Homo sapiens FLJ37709; Fb>    | 0.0088667  | 0.01824026 | 1.86410863 |
| C14orf79    | NM_174891.2 | C14orf79     | 14 | Homo sapiens chromosome 1     | 0.00021386 | 0.00101143 | 1.8615851  |
| TP53INP1    | NM_033285.2 | TP53INP1     | 8  | Homo sapiens TP53INP1A; T<    | 7.39E-08   | 4.44E-06   | 1.86104813 |
| ULBP2       | NM_025217.2 | ULBP2        | 6  | Homo sapiens RAET1H; N2DI     | 3.93E-07   | 1.26E-05   | 1.86073695 |
| CYTH1       | NM_017456.2 | CYTH1        | 17 | Homo sapiens FLJ41900; D1'    | 2.06E-05   | 0.00018948 | 1.85085847 |
| NES         | NM_006617.1 | NES          | 1  | Homo sapiens FLJ21841; Nbl    | 3.98E-05   | 0.00030463 | 1.85014504 |
| C5orf13     | NM_004772.1 | C5orf13      | 5  | Homo sapiens PTZ17; D4S11     | 0.02367923 | 0.0393736  | 1.8470298  |
| ZSWIM6      | XM_035299.7 | ZSWIM6       | 5  | PREDICTED: Homo sapiens z     | 6.03E-06   | 7.89E-05   | 1.84313426 |
| ANKRD20A1   | NM_00101242 | ANKRD20A1    |    | Homo sapiens DKFZp434A17      | 8.54E-06   | 1.00E-04   | 1.8424366  |
| REEP1       | NM_022912.1 | REEP1        | 2  | Homo sapiens SPG31; C2orf<    | 5.14E-07   | 1.51E-05   | 1.8413591  |
| LOC10013151 | XM_00172289 | LOC100131512 |    | PREDICTED: Homo sapiens h     | 0.00851911 | 0.01765891 | 1.84107976 |
| TBC1D16     | NM_019020.2 | TBC1D16      | 17 | Homo sapiens FLJ20748; MG     | 0.00015195 | 0.00078152 | 1.83657301 |
| ITFG3       | NM_032039.1 | ITFG3        | 16 | Homo sapiens FLJ32603; DK     | 2.40E-06   | 4.18E-05   | 1.83512242 |
| TMEM145     | NM_173633.1 | TMEM145      | 19 | Homo sapiens FLJ90805         | 6.23E-05   | 0.00041534 | 1.82506686 |
| RBM43       | NM_198557.2 | RBM43        | 2  | Homo sapiens RNA binding r    | 0.01371286 | 0.0256862  | 1.82143986 |
| LRRC20      | NM_207119.1 | LRRC20       | 10 | Homo sapiens FLJ10751; FLJ    | 5.19E-08   | 3.62E-06   | 1.81913133 |
| CBR4        | NM_032783.3 | CBR4         | 4  | Homo sapiens FLJ14431         | 3.64E-06   | 5.59E-05   | 1.8162221  |
| ZC3H10      | NM_032786.1 | ZC3H10       | 12 | Homo sapiens FLJ14451; ZC:    | 0.00072447 | 0.00257136 | 1.8154227  |
|             | Hs.535044   | HS.535044    |    | PREDICTED: Homo sapiens s     | 0.01235439 | 0.02371379 | 1.81521033 |
| GOLPH4      | NM_014498.2 | GOLPH4       | 3  | Homo sapiens P138; GIMPC;     | 0.00066292 | 0.00239674 | 1.81425133 |
| RNU1-3      | NR_004408.1 | RNU1-3       | 1  | Homo sapiens U1C21            | 1.84E-06   | 3.48E-05   | 1.8129596  |
| OSGEPL1     | NM_022353.1 | OSGEPL1      | 2  | Homo sapiens O-sialoglycopr   | 0.00905624 | 0.01854243 | 1.81130184 |
| FTO         | NM_00108043 | FTO          | 16 | Homo sapiens KIAA1752; MC     | 0.0006131  | 0.00226949 | 1.80895685 |
| GAA         | NM_000152.2 | GAA          | 17 | Homo sapiens LYAG             | 1.32E-05   | 0.00013457 | 1.80519712 |
| AMOT        | NM_133265.2 | AMOT         |    | Homo sapiens KIAA1071         | 0.00045787 | 0.00179837 | 1.80083544 |
| CLDN14      | NM_144492.1 | CLDN14       | 21 | Homo sapiens DFNB29           | 0.00156504 | 0.00469728 | 1.79919729 |
| GPR108      | NM_00108045 | GPR108       | 19 | Homo sapiens LUSTR2; MGC      | 9.39E-05   | 0.00055395 | 1.79815968 |
| CNFN        | NM_032488.2 | CNFN         | 19 | Homo sapiens PLAC8L2          | 3.96E-06   | 5.96E-05   | 1.79628625 |
| FAM116B     | NM_00100179 | FAM116B      |    | Homo sapiens MGC33692         | 1.29E-05   | 0.00013248 | 1.79392442 |
| FAM13B      | NM_00110180 | FAM13B       | 5  | Homo sapiens KHCHP; MGCS      | 3.21E-07   | 1.08E-05   | 1.79246018 |
| PHTF1       | NM_006608.1 | PHTF1        | 1  | Homo sapiens PHTF             | 4.67E-06   | 6.62E-05   | 1.7869743  |

2.0 Upreg

|           |             |             |                                |            |            |            |
|-----------|-------------|-------------|--------------------------------|------------|------------|------------|
| LOC652850 | XM_946103.1 | LOC652850   | PREDICTED: Homo sapiens h      | 0.01001228 | 0.0201134  | 1.78662825 |
| TMEM184A  | NM_152689.2 | TMEM184A    | 7 Homo sapiens MGC9712; FLJ    | 0.01676732 | 0.03009532 | 1.78424456 |
| LPPR2     | NM_022737.1 | LPPR2       | 19 Homo sapiens FLJ13055; DK   | 0.00087642 | 0.0029645  | 1.78362734 |
| SNAP29    | NM_004782.2 | SNAP29      | 22 Homo sapiens CEDNIK; SNAI   | 5.75E-05   | 0.00039378 | 1.78321522 |
| LOC653438 | XM_929895.1 | LOC653438   | 1 PREDICTED: Homo sapiens s    | 8.08E-05   | 0.0004979  | 1.78174362 |
| CPLX1     | NM_006651.3 | CPLX1       | 4 Homo sapiens CPX-1; CPX1     | 0.00218486 | 0.00602055 | 1.78069981 |
|           | Hs.4988     | HS.4988     | 2 Homo sapiens mRNA; cDNA I    | 3.39E-07   | 1.13E-05   | 1.7798259  |
| MAGEE1    | NM_020932.1 | MAGEE1      | Homo sapiens KIAA1587; HC      | 0.0057698  | 0.01295316 | 1.7777214  |
| KRTAP2-2  | XM_496261.2 | KRTAP2-2    | PREDICTED: Homo sapiens k      | 0.00099762 | 0.0032855  | 1.77759191 |
| PCYOX1L   | NM_024028.2 | PCYOX1L     | 5 Homo sapiens MGC3265         | 0.00028884 | 0.00126119 | 1.77626631 |
| SCARNA9   | NR_002569.1 | SCARNA9     | 11 Homo sapiens Z32; mgU2-1    | 8.81E-07   | 2.10E-05   | 1.77605458 |
| KIAA1024  | NM_015206.1 | KIAA1024    | 15 Homo sapiens KIAA1024 (KI   | 0.00062537 | 0.00229845 | 1.77208941 |
| SKAP2     | NM_003930.3 | SKAP2       | 7 Homo sapiens RA70; SCAP2;    | 1.66E-06   | 3.31E-05   | 1.7703235  |
| RCOR2     | NM_173587.2 | RCOR2       | 11 Homo sapiens REST corepres  | 8.12E-05   | 0.0004985  | 1.76633871 |
| LRRC3     | NM_030891.3 | LRRC3       | 21 Homo sapiens C21orf102      | 0.01357642 | 0.02548335 | 1.7648632  |
| ZCCHC24   | NM_153367.1 | ZCCHC24     | 10 Homo sapiens FLJ90798       | 0.00131727 | 0.00408564 | 1.76401085 |
| CDKN1C    | NM_000076.1 | CDKN1C      | 11 Homo sapiens BWCR; p57; B   | 0.00090814 | 0.0030509  | 1.76336403 |
| YPEL5     | NM_016061.1 | YPEL5       | 2 Homo sapiens CGI-127         | 6.74E-08   | 4.21E-06   | 1.76087858 |
| NUDT7     | NM_00110566 | NUDT7       | 16 Homo sapiens nudix (nucleos | 2.20E-07   | 8.64E-06   | 1.75288795 |
| ZDHHC11   | XM_940764.1 | ZDHHC11     | 5 Homo sapiens ZNF399; FLJ1.   | 0.00107956 | 0.00349917 | 1.75106516 |
| SLC29A4   | NM_00104066 | SLC29A4     | 7 Homo sapiens PMAT; FLJ349.   | 1.67E-07   | 7.20E-06   | 1.74947355 |
| IFT52     | NM_016004.2 | IFT52       | 20 Homo sapiens NGD5; CGI-53   | 7.93E-05   | 0.00049233 | 1.74860143 |
| GLB1L2    | NM_138342.2 | GLB1L2      | 11 Homo sapiens MST114; MSTI   | 7.31E-06   | 9.03E-05   | 1.74647903 |
| LOC646786 | XM_929738.1 | LOC646786   | 6 PREDICTED: Homo sapiens s    | 0.00025359 | 0.00113883 | 1.74368531 |
| ARL4A     | NM_00103716 | ARL4A       | 7 Homo sapiens ARL4            | 1.89E-05   | 0.00017729 | 1.74366772 |
| ZNF174    | NM_00103229 | ZNF174      | 16 Homo sapiens ZSCAN8         | 0.02168984 | 0.03674021 | 1.74357317 |
| PBX3      | NM_006195.4 | PBX3        | 9 Homo sapiens pre-B-cell leuk | 2.37E-06   | 4.15E-05   | 1.74328646 |
| LOC441268 | NM_00101372 | LOC441268   | 7 Homo sapiens hypothetical g  | 0.01653685 | 0.0297603  | 1.74290557 |
| ACAA2     | NM_006111.1 | ACAA2       | 18 Homo sapiens DSAEC          | 0.00011275 | 0.00062839 | 1.74061554 |
| CIB2      | NM_006383.2 | CIB2        | 15 Homo sapiens KIP2           | 0.0019425  | 0.00551779 | 1.74030217 |
| DGCR14    | NM_022719.1 | DGCR14      | 22 Homo sapiens ES2; DGSI; D   | 0.00242715 | 0.00656177 | 1.73954428 |
| GNG7      | NM_052847.1 | GNG7        | 19 Homo sapiens FLJ00058       | 2.79E-07   | 9.96E-06   | 1.73565631 |
| CADM4     | NM_145296.1 | CADM4       | 19 Homo sapiens Nlecl-4; TSL2  | 3.60E-05   | 0.00028437 | 1.7333099  |
| GCA       | NM_012198.2 | GCA         | 2 Homo sapiens GCL             | 1.66E-07   | 7.19E-06   | 1.73069507 |
| AK1       | NM_000476.1 | AK1         | 9 Homo sapiens adenylate kina  | 4.75E-06   | 6.67E-05   | 1.73012192 |
| NEURL1B   | NM_00114265 | NEURL1B     | 5 Homo sapiens neuralized hor  | 1.34E-06   | 2.82E-05   | 1.72890925 |
| MXRA7     | NM_00100852 | MXRA7       | 17 Homo sapiens TMAP1; PS1TF   | 4.10E-05   | 0.00031258 | 1.72756174 |
| LOC728229 | XM_943555.1 | LOC728229   | 22 PREDICTED: Homo sapiens h   | 0.00288755 | 0.00752563 | 1.72733568 |
| CGNL1     | NM_032866.3 | CGNL1       | 15 Homo sapiens MGC138254; .   | 8.07E-06   | 9.61E-05   | 1.72258343 |
| FAM195B   | NM_207368.1 | FAM195B     | 17 Homo sapiens DKFZp686A17    | 4.53E-05   | 0.00033548 | 1.72054385 |
| ABCG4     | NM_022169.3 | ABCG4       | 11 Homo sapiens WHITE2         | 0.00091902 | 0.0030827  | 1.71856019 |
| HLA-DRB3  | NM_022555.3 | HLA-DRB3    | 6 Homo sapiens MGC117330; I    | 4.05E-06   | 6.02E-05   | 1.7146002  |
| ABHD12    | NM_00104247 | ABHD12      | 20 Homo sapiens DKFZP434P10    | 0.00017589 | 0.00087289 | 1.71429654 |
| MYLIP     | NM_013262.3 | MYLIP       | 6 Homo sapiens MIR             | 3.29E-08   | 2.59E-06   | 1.71353766 |
|           | 3-Sep       | NM_019106.4 | 22 Homo sapiens SEP3; MGC13.   | 1.94E-07   | 7.97E-06   | 1.71282114 |
| CTSH      | NM_004390.2 | CTSH        | 15 Homo sapiens CPSB; ACC-4;   | 7.87E-06   | 9.45E-05   | 1.7127535  |
| SLC25A20  | XM_941287.1 | SLC25A20    | PREDICTED: Homo sapiens s      | 0.01535859 | 0.02808162 | 1.70778189 |
| POLR3H    | NM_00101805 | POLR3H      | 22 Homo sapiens RPC8; MGC29    | 0.00012149 | 0.00066281 | 1.70453856 |
| BEND6     | NM_152731.2 | BEND6       | 6 Homo sapiens BA203B9.1; FI   | 0.00102598 | 0.0033636  | 1.70038856 |
| GK5       | NM_152776.1 | GK5         | 3 Homo sapiens MGC40579; FI    | 0.01271819 | 0.02424509 | 1.70008112 |
| STAT3     | NM_213662.1 | STAT3       | 17 Homo sapiens APRF; FLJ208   | 6.12E-07   | 1.68E-05   | 1.69791623 |
| LOC643031 | XM_926402.1 | LOC643031   | 5 PREDICTED: Homo sapiens s    | 7.18E-07   | 1.84E-05   | 1.69690265 |
| F8A1      | NM_012151.3 | F8A1        | Homo sapiens DXS522E; HAI      | 0.0274065  | 0.04402865 | 1.6917907  |
| VASN      | NM_138440.1 | VASN        | 16 Homo sapiens SLITL2         | 1.20E-07   | 6.06E-06   | 1.68882082 |
| TBC1D7    | NM_016495.2 | TBC1D7      | 6 Homo sapiens DKFZp686N23     | 3.43E-06   | 5.39E-05   | 1.68840029 |
| RABAC1    | NM_006423.1 | RABAC1      | 19 Homo sapiens PRAF1; PRA1;   | 5.51E-06   | 7.42E-05   | 1.68834694 |
| C11orf67  | NM_024684.2 | C11orf67    | 11 Homo sapiens FLJ21035; MG   | 2.53E-07   | 9.33E-06   | 1.68625439 |
| SPIRE2    | NM_032451.1 | SPIRE2      | 16 Homo sapiens MGC117166; S   | 0.00016697 | 0.00083818 | 1.68491719 |
| RNU1G2    | NR_004426.1 | RNU1G2      | 1 Homo sapiens U1D2; U1B2;     | 1.35E-07   | 6.43E-06   | 1.68308448 |
| MPZL1     | NM_024569.3 | MPZL1       | 1 Homo sapiens PZR; PZRa; PZ   | 4.36E-06   | 6.32E-05   | 1.67894263 |
|           | Hs.291319   | HS.291319   | Homo sapiens mRNA; cDNA I      | 0.00103939 | 0.00339529 | 1.6762746  |
| CITED2    | NM_006079.3 | CITED2      | 6 Homo sapiens P35SRJ; MRGJ    | 2.39E-08   | 2.20E-06   | 1.67625415 |
| ATXN1     | NM_000332.2 | ATXN1       | 6 Homo sapiens SCA1; D6S50     | 1.31E-05   | 0.000134   | 1.67235785 |
| PTPN13    | NM_080684.1 | PTPN13      | 4 Homo sapiens PTP1E; PNP1;    | 0.0195748  | 0.03388642 | 1.67077435 |
| MTF1      | NM_005955.1 | MTF1        | 1 Homo sapiens MGC23036; ZI    | 5.88E-05   | 0.00039911 | 1.66986951 |
| SCARNA8   | NR_003009.1 | SCARNA8     | 9 Homo sapiens U92             | 3.26E-08   | 2.58E-06   | 1.66974182 |
| SORT1     | NM_002959.4 | SORT1       | 1 Homo sapiens NT3; Gp95       | 2.11E-07   | 8.42E-06   | 1.66866526 |
| LOC729495 | XR_015564.1 | LOC729495   | 22 PREDICTED: Homo sapiens s   | 5.28E-06   | 7.18E-05   | 1.6685761  |
| LOC649917 | XR_036859.1 | LOC649917   | PREDICTED: Homo sapiens n      | 0.00075369 | 0.00264657 | 1.66790998 |
| FOXO1     | NM_002015.2 | FOXO1       | 13 Homo sapiens FKHR; FKH1; I  | 0.00959839 | 0.0194473  | 1.66789074 |

## 2.0 Upreg

|           |             |           |    |                           |                 |            |            |            |
|-----------|-------------|-----------|----|---------------------------|-----------------|------------|------------|------------|
| SLC25A30  | NM_00101087 | SLC25A30  | 13 | Homo sapiens              | KMCP1           | 4.76E-05   | 0.00034714 | 1.66390084 |
| TSPAN33   | NM_178562.2 | TSPAN33   | 7  | Homo sapiens              | MGC50844; P     | 0.00010466 | 0.00059706 | 1.66346107 |
| GRPR      | NM_005314.2 | GRPR      | X  | Homo sapiens              | gastrin-releasi | 0.01157247 | 0.02255149 | 1.65950219 |
| RHOA      | NM_021205.4 | RHOA      | 1  | Homo sapiens              | WRCH1; CDC4     | 0.00375967 | 0.00925483 | 1.6567435  |
| SIPA1L2   | NM_020808.1 | SIPA1L2   | 1  | Homo sapiens              | SPAL2; FLJ231   | 5.20E-06   | 7.11E-05   | 1.65601376 |
| FLJ22795  | NM_025084.1 | FLJ22795  | 15 | Homo sapiens              | hypothetical p  | 2.83E-06   | 4.68E-05   | 1.65566573 |
| NKX3-1    | NM_006167.2 | NKX3-1    | 8  | Homo sapiens              | NKX3A; BAPX     | 1.49E-06   | 3.04E-05   | 1.654928   |
| U1SNRNPBP | NM_180703.1 | U1SNRNPBP | 12 | Homo sapiens              | MGC138160; I    | 0.00356662 | 0.00887206 | 1.65398078 |
| SPRY1     | NM_005841.1 | SPRY1     | 4  | Homo sapiens              | hSPRY1          | 0.0177185  | 0.03131133 | 1.65337374 |
| APLP2     | NM_001642.1 | APLP2     | 11 | Homo sapiens              | CDEBP; APPH;    | 2.11E-07   | 8.45E-06   | 1.6527375  |
| WIPI1     | NM_017983.3 | WIPI1     |    | Homo sapiens              | WIPI49; FLJ10   | 5.91E-06   | 7.78E-05   | 1.65154722 |
| PEX6      | NM_000287.2 | PEX6      | 6  | Homo sapiens              | PAF-2; PAF2; I  | 3.37E-05   | 0.00026933 | 1.65143471 |
| MAP1LC3B  | NM_022818.3 | MAP1LC3B  | 16 | Homo sapiens              | MAP1A/1BLC3     | 7.19E-09   | 1.18E-06   | 1.65078257 |
| GMPT      | NM_006877.2 | GMPT      | 6  | Homo sapiens              | GMPT1           | 6.28E-05   | 0.00041723 | 1.6488767  |
| FAM149B1  | NM_173348.1 | FAM149B1  | 10 | Homo sapiens              | family with sei | 0.0001124  | 0.00062738 | 1.64675534 |
| TPMT      | NM_000367.4 | TPMT      | 6  | Homo sapiens              | thiopurine S-n  | 3.40E-06   | 5.37E-05   | 1.64143147 |
| BAMBI     | NM_012342.2 | BAMBI     | 10 | Homo sapiens              | NMA             | 5.02E-09   | 9.41E-07   | 1.64073468 |
| IRS2      | NM_003749.2 | IRS2      | 13 | Homo sapiens              | insulin receptc | 0.00019957 | 0.00096013 | 1.63872999 |
| SLC7A11   | NM_014331.2 | SLC7A11   | 4  | Homo sapiens              | CCBR1; xCT      | 0.00072294 | 0.00256847 | 1.63782858 |
| EIF4E3    | NM_173359.3 | EIF4E3    | 3  | Homo sapiens              | MGC86971; M     | 0.00014039 | 0.00073389 | 1.63701502 |
| GALT      | NM_000155.2 | GALT      | 9  | Homo sapiens              | galactose-1-pl  | 0.00722399 | 0.01547916 | 1.63330916 |
| ASAP2     | NM_003887.2 | ASAP2     | 2  | Homo sapiens              | ArfGAP with Si  | 5.22E-06   | 7.13E-05   | 1.63314219 |
| SLC44A3   | NM_152369.2 | SLC44A3   | 1  | Homo sapiens              | CTL3; MGC45     | 6.80E-05   | 0.00044323 | 1.63296417 |
| CBX7      | NM_175709.2 | CBX7      | 22 | Homo sapiens              | chromobox ho    | 4.74E-05   | 0.00034641 | 1.63215705 |
| LRRRC45   | NM_144999.2 | LRRRC45   | 17 | Homo sapiens              | MGC20806        | 0.00015334 | 0.00078682 | 1.63169698 |
| POLR2L    | NM_021128.3 | POLR2L    | 11 | Homo sapiens              | hsRBP10b; RP    | 8.60E-06   | 0.00010029 | 1.63076703 |
| IRF2BP2   | NM_182972.1 | IRF2BP2   | 1  | Homo sapiens              | MGC72189        | 1.43E-05   | 0.00014373 | 1.62764386 |
| ABL2      | NM_005158.2 | ABL2      | 1  | Homo sapiens              | FLJ31718; ABI   | 0.00451781 | 0.01068543 | 1.62563416 |
| FYCO1     | NM_024513.1 | FYCO1     | 3  | Homo sapiens              | FLJ13335; RU    | 7.39E-07   | 1.87E-05   | 1.62377783 |
| ZBTB46    | NM_025224.2 | ZBTB46    | 20 | Homo sapiens              | BTBD4; ZNF3     | 7.94E-05   | 0.00049255 | 1.62102885 |
| SLC9A1    | NM_003047.2 | SLC9A1    | 1  | Homo sapiens              | APNH; FLJ422    | 1.35E-05   | 0.00013703 | 1.6188983  |
| DDAH2     | NM_013974.1 | DDAH2     | 6  | Homo sapiens              | DDAH2; NG30     | 0.03013728 | 0.0472629  | 1.61772205 |
| LOC645094 | XR_039085.1 | LOC645094 |    | PREDICTED: Homo sapiens n |                 | 3.30E-06   | 5.24E-05   | 1.61574922 |
| RNU1A3    | NR_004430.1 | RNU1A3    | 1  | Homo sapiens              | HSD1; U1A1      | 8.76E-08   | 4.96E-06   | 1.61495333 |
| C7orf36   | NM_020192.1 | C7ORF36   | 7  | Homo sapiens              | GK003           | 0.0001881  | 0.00091715 | 1.61424141 |
| NAGK      | NM_017567.2 | NAGK      | 2  | Homo sapiens              | GNK; HSA242     | 2.06E-07   | 8.37E-06   | 1.61239725 |
| ZNRF3     | XM_945269.1 | ZNRF3     | 22 | Homo sapiens              | MRF203; BK74    | 0.004244   | 0.01014156 | 1.61153941 |
| GNGT1     | NM_021955.3 | GNGT1     | 7  | Homo sapiens              | GNG1            | 0.02676178 | 0.04322934 | 1.60948836 |
| PLSCR4    | NM_020353.1 | PLSCR4    | 3  | Homo sapiens              | phospholipid s  | 0.00037202 | 0.00153616 | 1.60935684 |
| MAP2K3    | NM_145109.1 | MAP2K3    | 17 | Homo sapiens              | MAPKK3; PRK1    | 0.00179339 | 0.00520164 | 1.60717072 |
| HABP4     | NM_014282.1 | HABP4     | 9  | Homo sapiens              | SERBP1L; IHA    | 1.59E-07   | 6.96E-06   | 1.60704019 |
| RBM20     | XM_291671.6 | RBM20     |    | PREDICTED: Homo sapiens R |                 | 0.03101346 | 0.0482955  | 1.60590629 |
| TRIM68    | NM_018073.5 | TRIM68    | 11 | Homo sapiens              | MGC126176; S    | 0.00072479 | 0.00257166 | 1.60354723 |
| SNORD3D   | NR_006882.1 | SNORD3D   | 17 | Homo sapiens              | U3-4            | 4.33E-07   | 1.33E-05   | 1.60041916 |
| B4GALNT4  | NM_178537.3 | B4GALNT4  | 11 | Homo sapiens              | Beta4GalNAC-1   | 0.00961783 | 0.01947579 | 1.60024043 |
| KIFAP3    | NM_014970.2 | KIFAP3    | 1  | Homo sapiens              | SMAP; Smg-G     | 7.85E-06   | 9.45E-05   | 1.59948174 |
| CEBPA     | NM_004364.2 | CEBPA     | 19 | Homo sapiens              | CEBP; C/EBP-    | 0.00118035 | 0.00375418 | 1.59534851 |
| IGSF3     | NM_001542.2 | IGSF3     | 1  | Homo sapiens              | V8; EWI-3; M    | 3.65E-08   | 2.77E-06   | 1.59489298 |
| ATE1      | NM_007041.2 | ATE1      | 10 | Homo sapiens              | MGC26724        | 0.00352507 | 0.00879487 | 1.59459026 |
| TPM1      | NM_00101800 | TPM1      | 15 | Homo sapiens              | TPM1-alpha; T   | 0.00177304 | 0.00516744 | 1.59189801 |
| FAM105A   | NM_019018.1 | FAM105A   | 5  | Homo sapiens              | FLJ11127        | 0.01503018 | 0.02759722 | 1.59098838 |
| SEC22B    | NM_004892.3 | SEC22B    | 1  | Homo sapiens              | SEC22L1; ERS    | 6.53E-06   | 8.40E-05   | 1.58990926 |
| HSPA4L    | NM_014278.2 | HSPA4L    | 4  | Homo sapiens              | Osp94; APG-1    | 5.69E-05   | 0.00039179 | 1.5896848  |
| ARID5B    | NM_032199.1 | ARID5B    | 10 | Homo sapiens              | MRF2; FLJ211    | 8.77E-06   | 0.00010153 | 1.58936394 |
| MT2A      | NM_005953.2 | MT2A      | 16 | Homo sapiens              | MT2             | 7.57E-07   | 1.90E-05   | 1.58883782 |
| PLXNA1    | NM_032242.2 | PLXNA1    | 3  | Homo sapiens              | NOV; PLXN1; I   | 0.00020134 | 0.00096648 | 1.58469135 |
| PIGH      | NM_004569.2 | PIGH      | 14 | Homo sapiens              | GPI-H           | 6.10E-06   | 7.94E-05   | 1.58327276 |
| CDK5      | NM_004935.2 | CDK5      | 7  | Homo sapiens              | PSSALRE         | 5.70E-07   | 1.60E-05   | 1.582663   |
| TMSB15A   | NM_021992.2 | TMSB15A   | X  | Homo sapiens              | Tb15; TMSNB;    | 6.98E-10   | 2.71E-07   | 1.57986181 |
|           | Hs.363526   | HS.363526 |    | Homo sapiens              | cDNA clone IM   | 4.34E-07   | 1.33E-05   | 1.57982965 |
| CXorf57   | NM_018015.3 | CXORF57   | X  | Homo sapiens              | RP11-647M7.1    | 1.56E-05   | 0.00015342 | 1.57949789 |
| GSDMB     | NM_018530.1 | GSDMB     | 17 | Homo sapiens              | PR02521; PP4    | 2.59E-07   | 9.44E-06   | 1.57565576 |
| DHDH      | NM_014475.2 | DHDH      | 19 | Homo sapiens              | HUM2DD          | 7.67E-05   | 0.00048039 | 1.57324699 |
| LGMN      | NM_005606.5 | LGMN      | 14 | Homo sapiens              | AEP; LGMN1; I   | 2.72E-07   | 9.79E-06   | 1.57103315 |
| UPLP      | NM_00111440 | UPLP      |    | Homo sapiens              | uropalakin-like | 6.91E-07   | 1.82E-05   | 1.56997016 |
| CTSD      | NM_001909.3 | CTSD      | 11 | Homo sapiens              | CLN10; MGC2     | 6.90E-05   | 0.00044665 | 1.56960758 |
| TMEM30A   | NM_018247.2 | TMEM30A   | 6  | Homo sapiens              | FLJ10856; C6    | 2.99E-06   | 4.87E-05   | 1.56950233 |
| LOC440731 | XM_933693.1 | LOC440731 | 1  | PREDICTED: Homo sapiens h |                 | 7.28E-07   | 1.85E-05   | 1.56927924 |
| ZDHHC18   | NM_032283.1 | ZDHHC18   | 1  | Homo sapiens              | DKFZp667O24     | 0.02915643 | 0.0461509  | 1.56897772 |
| SH3PXD2A  | NM_014631.2 | SH3PXD2A  | 10 | Homo sapiens              | SH3MD1; FIS     | 1.74E-05   | 0.0001666  | 1.56581453 |

2.0 Upreg

|             |                         |                                 |            |            |            |
|-------------|-------------------------|---------------------------------|------------|------------|------------|
| C11orf74    | NM_138787.2 C11ORF74    | 11 Homo sapiens FLJ38678        | 6.42E-07   | 1.73E-05   | 1.56533394 |
| SOX8        | NM_014587.2 SOX8        | 16 Homo sapiens MGC24837        | 1.33E-05   | 0.00013504 | 1.56527993 |
| SLC25A29    | NM_00103935 SLC25A29    | 14 Homo sapiens CACL; C14orf    | 0.0128273  | 0.02440174 | 1.56366264 |
| CSRN2       | NM_030809.1 CSRN2       | 12 Homo sapiens FLJ25576; C1    | 6.44E-05   | 0.00042587 | 1.5622616  |
| LOC402509   | XM_935493.1 LOC402509   | PREDICTED: Homo sapiens s       | 3.31E-05   | 0.00026689 | 1.56213991 |
| GPC4        | NM_001448.2 GPC4        | Homo sapiens K-glypican         | 1.76E-06   | 3.41E-05   | 1.5619591  |
| ACY1        | NM_000666.1 ACY1        | 3 Homo sapiens ACY1D; ACYL      | 0.00012061 | 0.00065971 | 1.56114094 |
| GBF1        | NM_004193.1 GBF1        | 10 Homo sapiens KIAA0248; MC    | 0.00078605 | 0.00272412 | 1.56093912 |
|             | Hs.551538 HS.551538     | 7 Homo sapiens mRNA; cDNA I     | 3.46E-06   | 5.41E-05   | 1.55971214 |
| SYN2        | NM_003178.3 SYN2        | 3 Homo sapiens SYNIIa; SYNII    | 0.00387597 | 0.00946395 | 1.55851964 |
| GLCE        | NM_015554.1 GLCE        | 15 Homo sapiens KIAA0836; HS    | 1.79E-07   | 7.53E-06   | 1.55669052 |
| PMS2L4      | NR_022007.1 PMS2L4      | 7 Homo sapiens postmeiotic se   | 4.79E-05   | 0.00034875 | 1.55657966 |
| FAM108A2    | XM_00172466 FAM108A2    | PREDICTED: Homo sapiens fi      | 3.63E-05   | 0.00028589 | 1.55514998 |
| LEPRE1      | NM_022356.2 LEPRE1      | 1 Homo sapiens P3H1; MGC11      | 5.80E-05   | 0.0003954  | 1.5549586  |
| VPS16       | NM_080413.1 VPS16       | 20 Homo sapiens hVPS16          | 1.35E-05   | 0.00013713 | 1.5543275  |
| NOXA1       | NM_006647.1 NOXA1       | 9 Homo sapiens KIAA131800; I    | 7.13E-05   | 0.00045711 | 1.55394721 |
| HSDL1       | NM_031463.3 HSDL1       | 16 Homo sapiens MGC125994; I    | 0.00033008 | 0.00140237 | 1.55201777 |
| RAB11FIP3   | NM_014700.2 RAB11FIP3   | 16 Homo sapiens KIAA0665; Ra    | 0.00025496 | 0.00114359 | 1.55195356 |
| SNORD83B    | NR_000028.1 SNORD83B    | 22 Homo sapiens U83B; RNU83     | 0.00032229 | 0.00137628 | 1.55167359 |
| TUBB4       | NM_006087.2 TUBB4       | 19 Homo sapiens TUBB5; beta-4   | 6.49E-07   | 1.74E-05   | 1.54697125 |
| CLEC16A     | NM_015226.1 CLEC16A     | 16 Homo sapiens KIAA0350; Go    | 2.30E-06   | 4.09E-05   | 1.54596864 |
| AP1B1       | NM_145730.1 AP1B1       | 22 Homo sapiens CLAPB2; ADTE    | 4.60E-06   | 6.56E-05   | 1.54572638 |
| TTYH3       | NM_025250.2 TTYH3       | 7 Homo sapiens KIAA1691         | 0.00012233 | 0.00066474 | 1.54409945 |
| TBC1D2B     | NM_015079.2 TBC1D2B     | 15 Homo sapiens KIAA1055; FL    | 0.00014379 | 0.00074948 | 1.54402876 |
| ZNF503      | NM_032772.4 ZNF503      | 10 Homo sapiens zinc finger pro | 5.46E-07   | 1.57E-05   | 1.54334442 |
| CCDC3       | NM_031455.2 CCDC3       | 10 Homo sapiens FLJ20925; DK    | 0.00151959 | 0.00459384 | 1.54239728 |
| PPM1H       | XM_939302.1 PPM1H       | 12 Homo sapiens KIAA1157; FL    | 2.31E-05   | 0.0002061  | 1.53977854 |
| HCCS        | NM_005333.2 HCCS        | Homo sapiens MCOPS7; DKF        | 9.98E-05   | 0.00057747 | 1.53962015 |
|             | Hs.159057 HS.159057     | 22 Homo sapiens hypothetical p  | 0.02241677 | 0.03770708 | 1.53895715 |
| ADARB1      | NM_00103304 ADARB1      | 21 Homo sapiens ADAR2a; ADA     | 0.00054144 | 0.00205317 | 1.538464   |
| HES1        | NM_005524.2 HES1        | 3 Homo sapiens HHL; FLJ2040     | 5.63E-05   | 0.00038998 | 1.53811192 |
| TIMP2       | XM_941104.1 TIMP2       | PREDICTED: Homo sapiens T       | 4.28E-09   | 8.77E-07   | 1.53742597 |
| KDM5B       | NM_006618.3 KDM5B       | 1 Homo sapiens FLJ23670; FLJ    | 1.67E-05   | 0.00016187 | 1.53666598 |
| DKK1        | NM_012242.2 DKK1        | 10 Homo sapiens DKK-1; SK       | 2.46E-08   | 2.20E-06   | 1.53651697 |
| NDFIP1      | NM_030571.2 NDFIP1      | 5 Homo sapiens N4WBP5; MGC      | 0.01523785 | 0.02788902 | 1.5362503  |
| TMEM98      | NM_015544.2 TMEM98      | 17 Homo sapiens DKFZP564K19     | 7.25E-07   | 1.85E-05   | 1.53596625 |
| PSMA2       | NM_002787.3 PSMA2       | 7 Homo sapiens HCS; MU; PSC     | 4.54E-06   | 6.50E-05   | 1.53338892 |
| RN5S9       | NR_023371.1 RN5S9       | 1 Homo sapiens RNA, 5S ribos    | 4.90E-05   | 0.00035281 | 1.5325845  |
| SNTA1       | NM_003098.2 SNTA1       | 20 Homo sapiens SNT1; dJ1187    | 0.00077469 | 0.00269505 | 1.53163563 |
| VRK3        | NM_00102577 VRK3        | 19 Homo sapiens vaccinia relate | 0.00322977 | 0.00819547 | 1.53000087 |
| WNT3A       | NM_033131.2 WNT3A       | 1 Homo sapiens MGC119419; I     | 0.00151961 | 0.00459264 | 1.52974656 |
| SLC25A44    | NM_014655.1 SLC25A44    | 1 Homo sapiens FLJ90431; KIA    | 5.74E-06   | 7.64E-05   | 1.52903718 |
| ASMTL       | XM_942506.1 ASMTL       | PREDICTED: Homo sapiens a       | 1.04E-06   | 2.39E-05   | 1.52803361 |
| IDH2        | NM_002168.2 IDH2        | 15 Homo sapiens ICD-M; IDHM;    | 6.46E-06   | 8.33E-05   | 1.52302786 |
| TMEM189     | NM_199129.1 TMEM189     | 20 Homo sapiens UBE2V1; Kua     | 5.70E-07   | 1.60E-05   | 1.52143778 |
| KCTD20      | NM_173562.3 KCTD20      | 6 Homo sapiens MGC14254; d      | 0.00051738 | 0.0019785  | 1.51951074 |
| LOC10012966 | XM_00171360 LOC10012966 | 6 PREDICTED: Homo sapiens h     | 2.79E-09   | 6.73E-07   | 1.51865307 |
| TMEM205     | NM_198536.1 TMEM205     | 19 Homo sapiens UNQ501; MGC     | 5.34E-09   | 9.52E-07   | 1.51858614 |
| PCTP        | NM_021213.1 PCTP        | 17 Homo sapiens STARD2          | 0.00015093 | 0.00077741 | 1.51774387 |
| LOC132241   | XM_379215.2 LOC132241   | 3 PREDICTED: Homo sapiens h     | 0.00585521 | 0.01310428 | 1.51736004 |
| EIF4EBP2    | NM_004096.3 EIF4EBP2    | 10 Homo sapiens 4EBP2           | 1.60E-06   | 3.22E-05   | 1.5168034  |
| RNU1-5      | NR_004400.1 RNU1-5      | 1 Homo sapiens HSD4             | 6.42E-08   | 4.13E-06   | 1.514659   |
| KLHL29      | XM_00171745 KLHL29      | 2 PREDICTED: Homo sapiens k     | 4.67E-06   | 6.60E-05   | 1.51434819 |
| KIAA1602    | XM_035497.1 KIAA1602    | 12 Homo sapiens Fp1193          | 0.00459702 | 0.01083975 | 1.51384485 |
| TSPAN31     | NM_005981.3 TSPAN31     | 12 Homo sapiens SAS             | 0.00396812 | 0.00963483 | 1.51369773 |
| CBWD3       | NM_201453.2 CBWD3       | 9 Homo sapiens bA561O23.1       | 2.07E-05   | 0.00019024 | 1.51363966 |
| MT1X        | NM_005952.2 MT1X        | 16 Homo sapiens MT1; MT-1I      | 2.10E-09   | 5.57E-07   | 1.5136238  |
| LOC649679   | XM_945046.1 LOC649679   | PREDICTED: Homo sapiens s       | 0.0002254  | 0.00105135 | 1.51060593 |
| VPS13A      | NM_033305.2 VPS13A      | 9 Homo sapiens KIAA0986; CH     | 0.00043912 | 0.00174746 | 1.51024376 |
| WFS1        | NM_006005.2 WFS1        | 4 Homo sapiens DFNA14; DID      | 7.91E-08   | 4.60E-06   | 1.50836219 |
| ACSL1       | NM_001995.2 ACSL1       | 4 Homo sapiens FACL2; LACS;     | 0.00085935 | 0.0029213  | 1.50783273 |
| SLC22A18    | NM_002555.3 SLC22A18    | 11 Homo sapiens IMP1; ORCTL     | 0.0007913  | 0.00273621 | 1.50683898 |
| TRIM21      | NM_003141.3 TRIM21      | 11 Homo sapiens RNF81; RO52;    | 0.00548165 | 0.01242172 | 1.50565422 |
|             | Hs.491292 HS.491292     | 8 Homo sapiens cDNA FLJ3655     | 0.00569813 | 0.01281076 | 1.5054764  |
| STX12       | NM_177424.1 STX12       | 1 Homo sapiens STX14; MGC5      | 0.00016171 | 0.00081741 | 1.5045055  |
| TPPAL       | NM_024331.2 TPPAL       | 20 Homo sapiens DKFZp686E08     | 8.48E-05   | 0.00051558 | 1.50430193 |
| C9orf40     | NM_017998.1 C9ORF40     | 9 Homo sapiens FLJ10110; FLJ    | 0.00056223 | 0.00211796 | 1.50398959 |
|             | Hs.371609 HS.371609     | 3 Homo sapiens cDNA clone IM    | 7.48E-06   | 9.14E-05   | 1.50313003 |
| RABL4       | NM_006860.2 RABL4       | 22 Homo sapiens RAYL            | 0.00013392 | 0.00070891 | 1.50214202 |
| COL4A5      | NM_033381.1 COL4A5      | Homo sapiens MGC42377; A        | 0.00046714 | 0.00183018 | 1.49889831 |





## 2.0 Upreg

|           |                       |                                 |            |            |            |
|-----------|-----------------------|---------------------------------|------------|------------|------------|
| C14orf78  | XM_941311.1 C14ORF78  | PREDICTED: Homo sapiens c       | 0.00049757 | 0.00192371 | 1.42519551 |
| SCPEP1    | NM_021626.1 SCPEP1    | 17 Homo sapiens RISC; HSCP1     | 8.77E-08   | 4.94E-06   | 1.42504629 |
| CGRRF1    | NM_006568.2 CGRRF1    | 14 Homo sapiens RNF197; CGR:    | 0.00018757 | 0.00091537 | 1.42495827 |
| ID2       | NM_002166.4 ID2       | 2 Homo sapiens GIG8; MGC26:     | 2.49E-08   | 2.20E-06   | 1.42478467 |
| ZNF558    | NM_144693.1 ZNF558    | 19 Homo sapiens FLJ30932        | 0.0042603  | 0.01017604 | 1.42478146 |
| FAM103A1  | NM_031452.2 FAM103A1  | 15 Homo sapiens HsT19360; C1    | 4.75E-06   | 6.67E-05   | 1.42454461 |
| C1orf97   | NM_032705.2 C1ORF97   | 1 Homo sapiens MGC14801; Fl     | 4.67E-06   | 6.61E-05   | 1.42209262 |
| SEMA4F    | NM_0042153.2 SEMA4F   | 2 Homo sapiens PRAO2353; M-S    | 6.32E-05   | 0.00041924 | 1.42166785 |
| SMA4      | NM_021652.2 SMA4      | Homo sapiens MGC22265           | 0.00055009 | 0.002078   | 1.42004499 |
| ADAT1     | NM_012091.2 ADAT1     | 16 Homo sapiens HADAT1          | 0.02155685 | 0.03657764 | 1.41986788 |
| IPO13     | NM_014652.2 IPO13     | 1 Homo sapiens RANBP13; KIA     | 0.01375003 | 0.02573809 | 1.41977643 |
| CYB5A     | NM_148923.2 CYB5A     | 18 Homo sapiens MCB5; CYB5      | 3.91E-07   | 1.25E-05   | 1.41943304 |
| DFNA5     | NM_004403.1 DFNA5     | 7 Homo sapiens ICERE-1          | 2.32E-05   | 0.00020632 | 1.41884443 |
| C15orf57  | NM_052849.2 C15ORF57  | 15 Homo sapiens MGC20481; Fl    | 1.04E-05   | 0.00011427 | 1.41825365 |
| FAM69B    | XM_942503.1 FAM69B    | PREDICTED: Homo sapiens fi      | 0.00013999 | 0.00073251 | 1.41778296 |
| MAST3     | XM_038153.1 MAST3     | 19 Homo sapiens KIAA0561        | 0.00013493 | 0.00071291 | 1.41713132 |
| DDEF2     | NM_003887.1 DDEF2     | 2 Homo sapiens PAG3; Pap-alp    | 0.00010764 | 0.00060836 | 1.4166161  |
| KIF3B     | NM_004798.2 KIF3B     | 20 Homo sapiens HH0048; KIAA    | 8.27E-06   | 9.78E-05   | 1.41654649 |
| WDR26     | NM_025160.4 WDR26     | 1 Homo sapiens FLJ21016; Mif    | 0.00519793 | 0.01192801 | 1.4155501  |
| PIH1D1    | NM_017916.1 PIH1D1    | 19 Homo sapiens NOP17; FLJ20    | 5.80E-05   | 0.00039544 | 1.4141501  |
| LOC399965 | XR_036921.1 LOC399965 | PREDICTED: Homo sapiens n       | 2.71E-05   | 0.00023253 | 1.41371431 |
| PRAME     | NM_206956.1 PRAME     | 22 Homo sapiens MAPE; OIP4      | 0.00374907 | 0.00923921 | 1.41365303 |
| UBE2L6    | NM_198183.1 UBE2L6    | 11 Homo sapiens UBCH8; RIG-E    | 4.88E-05   | 0.00035289 | 1.41355241 |
| CPE       | NM_001873.1 CPE       | 4 Homo sapiens carboxypeptid    | 4.55E-05   | 0.00033649 | 1.41280366 |
| CCDC53    | NM_016053.1 CCDC53    | 12 Homo sapiens CGI-116         | 0.00016289 | 0.00082261 | 1.41214291 |
| LMBRD1    | NM_018368.2 LMBRD1    | 6 Homo sapiens ba810122.1; F    | 1.65E-06   | 3.30E-05   | 1.41153551 |
| CYB561D1  | NM_182580.2 CYB561D1  | 1 Homo sapiens cytochrome b-    | 8.33E-05   | 0.00050853 | 1.40951643 |
| CDK2AP2   | NM_005851.3 CDK2AP2   | 11 Homo sapiens p14; FLJ1063    | 0.00087926 | 0.00296949 | 1.40861021 |
| MAPK14    | NM_139013.1 MAPK14    | 6 Homo sapiens p38; PRKM15;     | 0.01330347 | 0.02507929 | 1.40770537 |
| CPT2      | NM_000098.1 CPT2      | 1 Homo sapiens CPTASE; CPT1     | 7.58E-05   | 0.00047703 | 1.40770135 |
| HLA-F     | NM_018950.1 HLA-F     | 6 Homo sapiens HLA-5.4; HLAf    | 4.75E-06   | 6.68E-05   | 1.40753953 |
| IFI30     | NM_006332.3 IFI30     | 19 Homo sapiens MGC32056; IF    | 5.98E-05   | 0.00040271 | 1.40724906 |
| KDELRL3   | NM_016657.1 KDELRL3   | 22 Homo sapiens ERD2L3          | 3.19E-06   | 5.09E-05   | 1.405255   |
| TMEM132A  | NM_178031.2 TMEM132A  | 11 Homo sapiens DKFZp547E21     | 7.21E-06   | 8.94E-05   | 1.40463377 |
| HIF1AN    | NM_017902.1 HIF1AN    | 10 Homo sapiens DKFZp762F18     | 6.80E-05   | 0.0004433  | 1.40374938 |
| PQLC3     | NM_152391.2 PQLC3     | 2 Homo sapiens C2orf22; MGC     | 6.41E-07   | 1.74E-05   | 1.40353817 |
| DDB2      | NM_000107.1 DDB2      | 11 Homo sapiens FLJ34321        | 0.00056122 | 0.00211563 | 1.40102982 |
| HADHB     | NM_000183.2 HADHB     | 2 Homo sapiens MGC87480; M      | 0.00010377 | 0.00059416 | 1.40030236 |
| PCNX      | NM_014982.1 PCNX      | 14 Homo sapiens KIAA0805; PC    | 0.00076243 | 0.00266177 | 1.39939528 |
| MTE       | NM_175621.2 MTE       | Homo sapiens MT1I               | 1.51E-09   | 4.31E-07   | 1.39885013 |
| CSRP1     | NM_004078.1 CSRP1     | 1 Homo sapiens CRP; CRP1; Di    | 2.97E-06   | 4.84E-05   | 1.39777075 |
| ASAP3     | NM_017707.2 ASAP3     | 1 Homo sapiens CENTB6; ACAf     | 8.99E-06   | 0.00010331 | 1.3972766  |
| C3orf39   | NM_032806.4 C3ORF39   | 3 Homo sapiens AGO61; FLJ14     | 0.0003533  | 0.00147962 | 1.3972335  |
| ANKDD1A   | NM_182703.2 ANKDD1A   | 15 Homo sapiens MGC120306; I    | 3.32E-05   | 0.00026692 | 1.39686085 |
| GRK5      | NM_005308.2 GRK5      | 10 Homo sapiens GPRK5           | 5.35E-05   | 0.00030375 | 1.39675641 |
| FIG4      | NM_014845.4 FIG4      | 6 Homo sapiens SAC3; RP1-24     | 0.00054946 | 0.00207633 | 1.39667337 |
| ESPN      | NM_031475.1 ESPN      | 1 Homo sapiens DKFZP434A19      | 8.12E-05   | 0.00049884 | 1.39351976 |
| C6orf129  | NM_138493.1 C6ORF129  | 6 Homo sapiens HSPC265; MG      | 1.31E-05   | 0.00013428 | 1.3929141  |
| SEC22A    | NM_012430.2 SEC22A    | 3 Homo sapiens SEC22L2          | 0.00025755 | 0.0011528  | 1.39289077 |
| DYNLL2    | NM_080677.1 DYNLL2    | 17 Homo sapiens MGC17810; D     | 9.86E-07   | 2.28E-05   | 1.39269858 |
| EVI5L     | NM_145245.2 EVI5L     | 19 Homo sapiens ecotropic viral | 1.54E-05   | 0.00015187 | 1.39114543 |
| PXDN      | NM_012293.1 PXDN      | 2 Homo sapiens D2S448E; D2S     | 0.00091945 | 0.00308224 | 1.39094119 |
| C10orf47  | NM_153256.2 C10ORF47  | 10 Homo sapiens MGC35403        | 0.0047974  | 0.01121009 | 1.39091513 |
| GPAA1     | NM_003801.2 GPAA1     | 8 Homo sapiens hGAA1; GAA1      | 3.75E-06   | 5.72E-05   | 1.39038171 |
| CTSL2     | NM_001333.2 CTSL2     | 9 Homo sapiens CTSV; CATL2;     | 4.51E-08   | 3.24E-06   | 1.3900463  |
| DCUN1D3   | NM_173475.1 DCUN1D3   | 16 Homo sapiens MGC48972; Fl    | 1.12E-05   | 0.00012016 | 1.38977823 |
| PTEN      | NM_000314.3 PTEN      | 10 Homo sapiens MMAC1; MHAN     | 7.40E-06   | 9.11E-05   | 1.3894274  |
| CYP26B1   | NM_019885.2 CYP26B1   | 2 Homo sapiens CYP26A2; MG      | 3.54E-06   | 5.48E-05   | 1.38935344 |
| RRM2B     | NM_015713.3 RRM2B     | 8 Homo sapiens DKFZp686M05      | 0.00018436 | 0.00090335 | 1.38882493 |
| PRKAB2    | NM_005399.3 PRKAB2    | 1 Homo sapiens MGC61468         | 0.02046353 | 0.03508956 | 1.38579381 |
| PEX16     | NM_004813.1 PEX16     | 11 Homo sapiens peroxisomal b   | 0.00108378 | 0.00351075 | 1.38571088 |
| FBXO2     | NM_183412.2 FBXO2     | 1 Homo sapiens Fbs1; FBG1; F    | 5.45E-06   | 7.37E-05   | 1.38536723 |
| DDIT4L    | NM_145244.2 DDIT4L    | 4 Homo sapiens Rtp801L; RED     | 1.54E-05   | 0.00015202 | 1.38461199 |
| TMEM184B  | NM_012264.3 TMEM184B  | 22 Homo sapiens DKFZp686N11     | 8.57E-05   | 0.00052017 | 1.38395944 |
| LOC113386 | NM_138781.2 LOC113386 | 19 Homo sapiens FLJ44718; FLJ   | 0.00269285 | 0.00712067 | 1.383894   |
| CXADR     | NM_001338.3 CXADR     | 21 Homo sapiens CAR; HCAR       | 8.43E-06   | 9.90E-05   | 1.38382328 |
| ISCA2     | NM_194279.1 ISCA2     | 14 Homo sapiens HBLD1; ISA2;    | 0.0051126  | 0.01177199 | 1.38371341 |
| EPHA2     | NM_004431.2 EPHA2     | 1 Homo sapiens ECK              | 0.00020478 | 0.00097828 | 1.38327349 |
| HLA-G     | NM_002127.3 HLA-G     | 6 Homo sapiens MHC-G            | 0.01377624 | 0.02577383 | 1.38231549 |
| SP4       | NM_003112.3 SP4       | 7 Homo sapiens MGC130009; S     | 0.00303764 | 0.0078156  | 1.38212186 |

## 2.0 Upreg

|           |             |           |    |                         |                                        |            |            |            |
|-----------|-------------|-----------|----|-------------------------|----------------------------------------|------------|------------|------------|
| SLC2A8    | NM_014580.3 | SLC2A8    | 9  | Homo sapiens            | GLUTX1; GLUTX2                         | 3.04E-06   | 4.93E-05   | 1.38010861 |
| PECR      | NM_018441.2 | PECR      | 2  | Homo sapiens            | HSA250303; TSC1                        | 0.02753467 | 0.04419536 | 1.37987782 |
| GRB2      | NM_002086.3 | GRB2      | 17 | Homo sapiens            | MST084; ASH1L1                         | 0.00041721 | 0.00168248 | 1.37938487 |
| TYSND1    | NM_173555.1 | TYSND1    | 10 | Homo sapiens            | FLJ40378; MGC164253                    | 0.00354041 | 0.00882101 | 1.37932504 |
| C13orf15  | NM_014059.1 | C13ORF15  | 13 | Homo sapiens            | RGC-32; KIAA1153                       | 9.14E-05   | 0.0005429  | 1.37886225 |
| PDLIM3    | NM_014476.1 | PDLIM3    | 4  | Homo sapiens            | DKFZp686L034g1; MGC145136              | 0.00166067 | 0.00490307 | 1.37785897 |
| SKP1      | NM_006930.3 | SKP1      | 5  | Homo sapiens            | TCEB1L; MGC164253                      | 0.00045649 | 0.00179688 | 1.37743091 |
|           | Hs.294603   | HS.294603 | 14 | Homo sapiens            | cDNA FLJ128779; ATG5                   | 1.12E-06   | 2.48E-05   | 1.37734966 |
| NPTN      | NM_012428.1 | NPTN      | 15 | Homo sapiens            | SDFR1; GP55; RFX4                      | 1.72E-08   | 1.93E-06   | 1.37669141 |
| DGCR2     | NM_005137.1 | DGCR2     | 22 | Homo sapiens            | SEZ-12; IDD1                           | 3.70E-05   | 0.00028971 | 1.37557595 |
| SYTL4     | NM_080737.1 | SYTL4     |    | Homo sapiens            | DKFZp451P01.4                          | 0.01859119 | 0.03249945 | 1.37553847 |
| TBCE      | NM_003193.3 | TBCE      | 1  | Homo sapiens            | KCS; KCS1; p12-1                       | 2.25E-06   | 4.06E-05   | 1.37546735 |
| ACPL2     | NM_152282.2 | ACPL2     | 3  | Homo sapiens            | FLJ23751                               | 0.00016824 | 0.00084144 | 1.37468834 |
| KRT8P9    | XR_017231.2 | KRT8P9    | 15 | PREDICTED: Homo sapiens | n                                      | 3.75E-05   | 0.0002927  | 1.37428789 |
| YIF1B     | NM_00103173 | YIF1B     | 19 | Homo sapiens            | FinGER8                                | 3.58E-06   | 5.53E-05   | 1.3740809  |
| ISCA1     | NM_030940.3 | ISCA1     | 9  | Homo sapiens            | hIscA; RP11-509G23.1                   | 0.00024296 | 0.00110667 | 1.37232825 |
| LOC220686 | NM_199283.4 | LOC220686 | 22 | Homo sapiens            | hypothetical protein                   | 0.00572092 | 0.01285138 | 1.37144305 |
| MICB      | NM_005931.2 | MICB      | 6  | Homo sapiens            | PERB11.2                               | 6.70E-05   | 0.00043879 | 1.37105831 |
| PIGS      | NM_033198.2 | PIGS      | 17 | Homo sapiens            | FLJ45226; DKFZp451P01.4                | 0.01024288 | 0.0204594  | 1.37022086 |
| RNF216L   | NR_023385.1 | RNF216L   | 7  | Homo sapiens            | ring finger protein 216                | 0.01992943 | 0.03437984 | 1.37017085 |
| YIPF1     | NM_018982.3 | YIPF1     | 1  | Homo sapiens            | FinGER1; DJ104830                      | 7.13E-06   | 8.88E-05   | 1.36965491 |
| SNAPIN    | NM_012437.3 | SNAPIN    | 1  | Homo sapiens            | SNAPAP; SNAPAP1                        | 0.00053204 | 0.00202527 | 1.36942167 |
| C6orf170  | NM_152730.4 | C6ORF170  | 6  | Homo sapiens            | bA301B7.2; FLJ21527                    | 0.00180034 | 0.00520928 | 1.36940084 |
| PDE6D     | NM_002601.2 | PDE6D     | 2  | Homo sapiens            | PDED                                   | 2.66E-06   | 4.49E-05   | 1.36785023 |
| SYNJ2BP   | NM_018373.1 | SYNJ2BP   | 14 | Homo sapiens            | ARPD; OMP25; OMP25-AS1                 | 1.75E-06   | 3.41E-05   | 1.36756891 |
| FGFR1OP2  | NM_015633.1 | FGFR1OP2  | 12 | Homo sapiens            | DKFZp564O18.1                          | 1.72E-05   | 0.00016529 | 1.36636692 |
| CALU      | NM_001219.2 | CALU      | 7  | Homo sapiens            | FLJ90608                               | 2.01E-06   | 3.73E-05   | 1.36438658 |
| EFNA4     | NM_005227.2 | EFNA4     | 1  | Homo sapiens            | EFL4; LERK4; LERK4-IT1                 | 0.00867809 | 0.01793031 | 1.36352324 |
| ABC6      | NM_005689.1 | ABC6      | 2  | Homo sapiens            | ABC; EST455961.1                       | 0.0022002  | 0.00605668 | 1.3626124  |
| LOC729086 | XM_00112928 | LOC729086 | 1  | PREDICTED: Homo sapiens | s                                      | 1.85E-05   | 0.00017489 | 1.36072184 |
| SAR1A     | NM_020150.3 | SAR1A     | 10 | Homo sapiens            | masra2; SARA                           | 3.63E-05   | 0.00028608 | 1.36030579 |
| PSCD1     | NM_017456.1 | PSCD1     | 17 | Homo sapiens            | D17S811E; B220060                      | 3.17E-06   | 5.06E-05   | 1.35810264 |
| HEYL      | NM_014571.2 | HEYL      | 1  | Homo sapiens            | MGC12623; HNF1B                        | 9.03E-05   | 0.00053997 | 1.35750689 |
| GTF2B     | NM_001514.3 | GTF2B     | 1  | Homo sapiens            | TFIIB; TF2B                            | 3.01E-06   | 4.88E-05   | 1.3573961  |
| GPS2      | NM_004489.4 | GPS2      | 17 | Homo sapiens            | MGC104294; I                           | 4.36E-05   | 0.00032686 | 1.35698947 |
| CD164     | NM_006016.3 | CD164     | 6  | Homo sapiens            | endolyn; MGC164253                     | 0.00524487 | 0.01200279 | 1.3568333  |
| ELF1      | NM_172373.2 | ELF1      | 13 | Homo sapiens            | E74-like factor                        | 1.30E-05   | 0.00013368 | 1.35656568 |
| BCAS4     | NM_017843.3 | BCAS4     | 20 | Homo sapiens            | FLJ20495                               | 0.00015379 | 0.00078837 | 1.35546668 |
| FUCA1     | NM_000147.2 | FUCA1     | 1  | Homo sapiens            | fucosidase, alpha-L-fucose 4-epimerase | 8.46E-07   | 2.05E-05   | 1.35532706 |
| CRYZL1    | NM_145858.1 | CRYZL1    | 21 | Homo sapiens            | QOH-1; 4P11                            | 0.00623671 | 0.01378494 | 1.3551195  |
| FBXO33    | NM_203301.1 | FBXO33    | 14 | Homo sapiens            | c14_5247; Fbxo33                       | 3.49E-06   | 5.43E-05   | 1.35496573 |
| JUNB      | NM_002229.2 | JUNB      | 19 | Homo sapiens            | jun B proto-oncogene                   | 0.00123512 | 0.00388406 | 1.35487159 |
| TAGLN2    | NM_003564.1 | TAGLN2    | 1  | Homo sapiens            | KIAA0120; HAFK                         | 2.55E-06   | 4.36E-05   | 1.3547915  |
| ZCCHC14   | NM_015144.1 | ZCCHC14   | 16 | Homo sapiens            | MGC126527; I                           | 4.31E-06   | 6.29E-05   | 1.35463666 |
| DNM2      | NM_004945.2 | DNM2      | 19 | Homo sapiens            | CMTDI1; CMTDI1-AS1                     | 0.00362715 | 0.00899175 | 1.35419327 |
| GPR177    | NM_024911.4 | GPR177    | 1  | Homo sapiens            | FLJ23091; C11orf102                    | 1.09E-05   | 0.00011801 | 1.35381232 |
| STIM1     | NM_003156.2 | STIM1     | 11 | Homo sapiens            | GOK; D11S488E3                         | 0.02006556 | 0.03453793 | 1.35378359 |
| C6orf85   | NM_021945.4 | C6ORF85   | 6  | Homo sapiens            | DKFZP434F01                            | 8.37E-05   | 0.00051026 | 1.35338213 |
| CRABP2    | NM_001878.2 | CRABP2    | 1  | Homo sapiens            | CRABP-II; RBP1                         | 1.77E-08   | 1.92E-06   | 1.34983991 |
| TMEM208   | NM_014187.3 | TMEM208   | 16 | Homo sapiens            | HSBP171                                | 0.00080224 | 0.00276786 | 1.34940169 |
| GLIPR2    | NM_022343.2 | GLIPR2    | 9  | Homo sapiens            | GLIPR2; GAPR1                          | 2.72E-07   | 9.82E-06   | 1.34755133 |
| NUDT18    | NM_024815.2 | NUDT18    | 8  | Homo sapiens            | FLJ22494                               | 0.00068801 | 0.00246939 | 1.34750332 |
| CYFIP2    | NM_00103733 | CYFIP2    | 5  | Homo sapiens            | PIR121                                 | 3.97E-05   | 0.00030448 | 1.3461994  |
| C3orf10   | NM_018462.4 | C3ORF10   | 3  | Homo sapiens            | MDS027; HSP70                          | 3.97E-07   | 1.27E-05   | 1.34615093 |
| FLJ31306  | XM_00171796 | FLJ31306  | 14 | PREDICTED: Homo sapiens | h                                      | 0.00238482 | 0.0064634  | 1.3459372  |
| NUAK1     | NM_014840.2 | NUAK1     | 12 | Homo sapiens            | KIAA0537; AR                           | 0.00042685 | 0.00171181 | 1.34574508 |
| ZCCHC17   | NM_016505.2 | ZCCHC17   | 1  | Homo sapiens            | pNO40; PS1D                            | 8.05E-07   | 1.98E-05   | 1.34503351 |
| LOC151162 | NR_024275.1 | LOC151162 | 2  | Homo sapiens            | hypothetical protein                   | 7.80E-08   | 4.58E-06   | 1.34478057 |
| STX8      | NM_004853.1 | STX8      | 17 | Homo sapiens            | CARB                                   | 1.74E-06   | 3.40E-05   | 1.34427395 |
| LOC653344 | XM_933085.1 | LOC653344 | 15 | PREDICTED: Homo sapiens | s                                      | 2.28E-06   | 4.08E-05   | 1.34385653 |
| LOC641298 | XR_041850.1 | LOC641298 | 16 | PREDICTED: Homo sapiens | n                                      | 0.00084116 | 0.00287205 | 1.3434603  |
| COBL      | NM_015198.2 | COBL      | 7  | Homo sapiens            | DKFZp686G13.1                          | 3.01E-06   | 4.89E-05   | 1.34334578 |
| AADAACL1  | NM_020792.3 | AADAACL1  | 3  | Homo sapiens            | arylacetylamide oxidase                | 8.12E-05   | 0.00049847 | 1.3433325  |
| TULP4     | NM_020245.3 | TULP4     | 6  | Homo sapiens            | RP3-442A17.1                           | 0.00291671 | 0.00758706 | 1.342796   |
| MYEOV     | NM_138768.2 | MYEOV     | 11 | Homo sapiens            | OCIM                                   | 0.00014612 | 0.00075873 | 1.3425344  |
| JARID2    | NM_004973.2 | JARID2    | 6  | Homo sapiens            | JMJ                                    | 1.35E-05   | 0.00013717 | 1.34186816 |
| FLNB      | NM_001457.1 | FLNB      | 3  | Homo sapiens            | FLN1L; filamin B                       | 4.96E-07   | 1.47E-05   | 1.341791   |
| MFGE8     | NM_005928.1 | MFGE8     | 15 | Homo sapiens            | HsT19888; BA                           | 5.73E-08   | 3.82E-06   | 1.34178306 |
| KLRAQ1    | NM_00113562 | KLRAQ1    | 2  | Homo sapiens            | KLRAQ motif cluster                    | 0.03036529 | 0.04752448 | 1.34047155 |
| RTN3      | NM_201428.1 | RTN3      | 11 | Homo sapiens            | NSPLII; NSPLII-AS1                     | 5.95E-05   | 0.00040109 | 1.33869108 |

2.0 Upreg

|             |             |              |                                |            |            |            |
|-------------|-------------|--------------|--------------------------------|------------|------------|------------|
| DKFZp761P04 | XM_291277.4 | DKFZP761P04  | 8 PREDICTED: Homo sapiens h    | 0.00118712 | 0.00377128 | 1.33864223 |
| CREG1       | NM_003851.2 | CREG1        | 1 Homo sapiens CREG            | 1.12E-06   | 2.48E-05   | 1.33813983 |
| PDRG1       | NM_030815.2 | PDRG1        | 20 Homo sapiens PDRG; C2orf    | 9.52E-05   | 0.00055971 | 1.33768264 |
| SLC25A4     | NM_001151.2 | SLC25A4      | 4 Homo sapiens PEO2; ANT1; I   | 1.12E-07   | 5.70E-06   | 1.33746716 |
| GHDC        | NM_032484.3 | GHDC         | 17 Homo sapiens D11LGP1; LGF   | 0.02226379 | 0.03751362 | 1.33669385 |
| PANX2       | NM_052839.2 | PANX2        | 22 Homo sapiens hPANX2; MGC    | 0.01374293 | 0.02572923 | 1.33516675 |
| RANBP10     | NM_020850.1 | RANBP10      | 16 Homo sapiens KIAA1464; FL   | 0.00308697 | 0.00790509 | 1.33514519 |
| C8orf55     | NM_016647.1 | C8ORF55      | 8 Homo sapiens DSCD75          | 2.41E-06   | 4.19E-05   | 1.33292309 |
|             | Hs.27048    | HS.27048     | 12 Homo sapiens cDNA FLJ3175   | 0.00037186 | 0.00153604 | 1.33253878 |
| CTSB        | NM_001908.3 | CTSB         | 8 Homo sapiens CPSB; APPS      | 0.00030129 | 0.00130247 | 1.33143142 |
| ANKFY1      | NM_020740.1 | ANKFY1       | 17 Homo sapiens KIAA1255; DK   | 0.0038564  | 0.00942464 | 1.32941103 |
| NELF        | NM_015537.3 | NELF         | 9 Homo sapiens RP11-48C7.1;    | 6.00E-06   | 7.86E-05   | 1.32922436 |
| SLC25A42    | NM_178526.1 | SLC25A42     | 19 Homo sapiens MGC26694       | 0.00627083 | 0.01384064 | 1.32845869 |
| MTMR14      | NM_022485.2 | MTMR14       | 3 Homo sapiens FLJ22405; C3    | 8.94E-05   | 0.00053591 | 1.32806861 |
| RAB31       | NM_006868.2 | RAB31        | 18 Homo sapiens Rab22B         | 7.53E-07   | 1.89E-05   | 1.32771284 |
| TPST2       | NM_00100856 | TPST2        | 22 Homo sapiens tyrosylprotein | 0.00033538 | 0.00142048 | 1.32768724 |
| ACAD11      | NM_032169.3 | ACAD11       | 3 Homo sapiens FLJ12592; MG    | 0.00028453 | 0.00125041 | 1.32710942 |
| C9orf16     | NM_024112.2 | C9ORF16      | 9 Homo sapiens EST00098; FL    | 0.02242956 | 0.03771693 | 1.32662478 |
| CSAG3B      | NM_00108084 | CSAG3B       | Homo sapiens CSAG2             | 0.01507734 | 0.02766045 | 1.32636238 |
| EIF2S1      | NM_004094.4 | EIF2S1       | 14 Homo sapiens EIF2A; EIF-2A  | 0.00013419 | 0.00070967 | 1.32588968 |
| RERE        | NM_012102.3 | RERE         | 1 Homo sapiens ARP; ATN1L; A   | 0.01103668 | 0.0217216  | 1.3248253  |
| NECAP2      | NM_018090.3 | NECAP2       | 1 Homo sapiens FLJ10420; RP    | 1.13E-05   | 0.00012073 | 1.32390207 |
| IGF2R       | NM_000876.1 | IGF2R        | 6 Homo sapiens M6P-R; CD22     | 7.76E-07   | 1.93E-05   | 1.32301541 |
| MAP3K1      | XM_042066.1 | MAP3K1       | 5 Homo sapiens MAPKKK1; ME     | 0.00099886 | 0.00328659 | 1.32263979 |
| SGPL1       | NM_003901.2 | SGPL1        | 10 Homo sapiens KIAA1252; SP   | 0.00538827 | 0.01224587 | 1.32251271 |
| PLOD2       | NM_182943.2 | PLOD2        | 3 Homo sapiens LH2; TLH        | 8.76E-06   | 0.00010161 | 1.32234024 |
| NUDCD3      | NM_015332.2 | NUDCD3       | 7 Homo sapiens KIAA1068; Nu    | 8.12E-05   | 0.00049865 | 1.32128271 |
| ZBTB48      | NM_005341.1 | ZBTB48       | 1 Homo sapiens pp9964; HKR     | 0.0002372  | 0.0010868  | 1.32122434 |
| POR         | NM_000941.1 | POR          | 7 Homo sapiens CPR; FLJ2646    | 7.41E-05   | 0.00046929 | 1.32042101 |
| LOC10013253 | XR_038464.1 | LOC100132535 | PREDICTED: Homo sapiens n      | 0.00113372 | 0.00363996 | 1.31974138 |
| ELOVL5      | NM_021814.3 | ELOVL5       | 6 Homo sapiens HELO1; RP3-4    | 1.13E-05   | 0.00012074 | 1.31951822 |
| CSR2        | NM_001321.1 | CSR2         | 12 Homo sapiens CRP2; LMO5;    | 4.00E-06   | 5.97E-05   | 1.31929439 |
| UBN1        | NM_00107951 | UBN1         | 16 Homo sapiens VT4; VT        | 1.44E-05   | 0.00014424 | 1.31917351 |
| PVRL2       | NM_00104272 | PVRL2        | 19 Homo sapiens PVRR2; HVEB;   | 0.00117084 | 0.00373816 | 1.31764978 |
| LOC143666   | NM_002020.1 | LOC143666    | 11 PREDICTED: Homo sapiens h   | 0.00217229 | 0.00599655 | 1.31753846 |
| CDCP1       | NM_022842.3 | CDCP1        | 3 Homo sapiens SIMA135; TRA    | 0.00023317 | 0.00107557 | 1.31748417 |
| TM7SF2      | NM_003273.1 | TM7SF2       | 11 Homo sapiens ANG1; DHCR1    | 2.81E-06   | 4.67E-05   | 1.31708637 |
| TMEM50B     | NM_006134.4 | TMEM50B      | 21 Homo sapiens C21orf4; HCVI  | 2.39E-05   | 0.00021143 | 1.31691465 |
| HCFC1R1     | NM_00100201 | HCFC1R1      | 16 Homo sapiens MGC99622; H    | 7.81E-07   | 1.94E-05   | 1.31653474 |
| MIDN        | NM_177401.4 | MIDN         | 19 Homo sapiens DKFZp547M07    | 0.00011134 | 0.00062343 | 1.3162217  |
| FUK         | NM_145059.2 | FUK          | 16 Homo sapiens 1110046B12R    | 0.00164672 | 0.00487513 | 1.31576614 |
| NOTCH3      | NM_000435.1 | NOTCH3       | 19 Homo sapiens CASIL; CADAS   | 0.00531043 | 0.0121044  | 1.31356965 |
| FAM127A     | NM_003928.1 | FAM127A      | X Homo sapiens CXX1; MAR8C     | 1.04E-05   | 0.00011446 | 1.31301777 |
| POFUT2      | NM_015227.3 | POFUT2       | 21 Homo sapiens C21orf80; FUT  | 8.04E-05   | 0.00049643 | 1.31203376 |
| TBC1D20     | NM_144628.2 | TBC1D20      | 20 Homo sapiens FLJ45119; C2   | 0.00376195 | 0.00925835 | 1.31199171 |
| PRKCZ       | NM_00103358 | PRKCZ        | 1 Homo sapiens PKCZ            | 0.01033939 | 0.02061428 | 1.31082523 |
| RNF182      | NM_152737.2 | RNF182       | 6 Homo sapiens FLJ40772; MG    | 0.01169511 | 0.0227334  | 1.3104843  |
| CDK6        | NM_001259.5 | CDK6         | 7 Homo sapiens PLSTIRE; MGC    | 9.48E-06   | 0.00010724 | 1.30967529 |
| DUSP6       | NM_001946.2 | DUSP6        | 12 Homo sapiens MKP3; PYST1    | 1.41E-07   | 6.60E-06   | 1.30882969 |
| SCAND1      | NM_033630.1 | SCAND1       | 20 Homo sapiens RAZ1; SDP1     | 9.09E-05   | 0.0005419  | 1.30839393 |
| C9orf156    | NM_016481.2 | C9ORF156     | 9 Homo sapiens NAP1; RP11-2    | 0.01121307 | 0.0219772  | 1.30819148 |
| HFE         | NM_000410.3 | HFE          | 6 Homo sapiens MGC103790; I    | 0.03102581 | 0.04830089 | 1.30810818 |
| NAPB        | NM_022080.1 | NAPB         | 20 Homo sapiens SNAP-BETA; N   | 0.01706833 | 0.03043455 | 1.30736636 |
| ARFGAP1     | NM_175609.1 | ARFGAP1      | 20 Homo sapiens ARF1GAP; HRI   | 0.00455349 | 0.01075344 | 1.30563427 |
| ITM2C       | NM_00101251 | ITM2C        | 2 Homo sapiens E25; ITM3; BF   | 1.50E-08   | 1.83E-06   | 1.30554689 |
| TMEM179B    | NM_199337.2 | TMEM179B     | 11 Homo sapiens transmembran   | 2.49E-05   | 0.00021821 | 1.30496777 |
| ARL8B       | NM_018184.2 | ARL8B        | 3 Homo sapiens FLJ10702; ARI   | 5.25E-07   | 1.52E-05   | 1.30477946 |
| ZDHHC12     | NM_032799.4 | ZDHHC12      | 9 Homo sapiens MGC13153; M     | 0.00016147 | 0.00081697 | 1.3036848  |
| OSTF1       | NM_012383.3 | OSTF1        | 9 Homo sapiens bA235014.1; I   | 8.62E-06   | 0.0001004  | 1.30327186 |
| TBPL1       | NM_004865.2 | TBPL1        | 6 Homo sapiens TRF2; STUD; I   | 1.28E-06   | 2.73E-05   | 1.30310957 |
| ARID3A      | NM_005224.1 | ARID3A       | 19 Homo sapiens E2FBP1; BRIG   | 0.00150758 | 0.0045639  | 1.3020249  |
| CTGLF7      | XM_00171478 | CTGLF7       | 10 PREDICTED: Homo sapiens c   | 3.10E-07   | 1.05E-05   | 1.30172761 |
| MED19       | NM_153450.1 | MED19        | 11 Homo sapiens LCMR1          | 0.00029345 | 0.00127516 | 1.30153083 |
| MXD4        | NM_006454.2 | MXD4         | 4 Homo sapiens MSTP149; MAI    | 5.30E-05   | 0.00037264 | 1.29970182 |
| TMEM99      | Hs.562720   | TMEM99       | 17 Homo sapiens MGC21518       | 9.99E-06   | 0.00011143 | 1.29958425 |
| AGRN        | NM_198576.2 | AGRN         | 1 Homo sapiens FLJ45064        | 0.0006454  | 0.00235534 | 1.2992451  |
| LAMP2       | NM_002294.1 | LAMP2        | X Homo sapiens CD107b; LAMP    | 4.61E-06   | 6.56E-05   | 1.29840511 |
| C20orf127   | NM_080757.1 | C20ORF127    | 20 Homo sapiens dJ61404.6; M   | 8.55E-07   | 2.07E-05   | 1.2983785  |
| PREB        | NM_013388.4 | PREB         | 2 Homo sapiens SEC12; MGC3     | 4.59E-05   | 0.00033861 | 1.29804701 |
| CDA         | NM_001785.1 | CDA          | 1 Homo sapiens CDD             | 0.00328049 | 0.00828547 | 1.29654885 |

2.0 Upreg

|             |                          |                                 |            |            |            |
|-------------|--------------------------|---------------------------------|------------|------------|------------|
| NSFL1C      | NM_182483.1 NSFL1C       | 20 Homo sapiens UBXD10; p47;    | 0.00017694 | 0.00087727 | 1.29615142 |
| CCND3       | NM_001760.2 CCND3        | 6 Homo sapiens cyclin D3 (CCN   | 1.30E-07   | 6.32E-06   | 1.29607254 |
| TMEM206     | NM_018252.2 TMEM206      | 1 Homo sapiens C1orf75; RP11    | 0.00041923 | 0.00168874 | 1.29560907 |
| SNAP47      | NM_053052.2 SNAP47       | 1 Homo sapiens DKFZp686M1C      | 0.00618917 | 0.01371053 | 1.29373514 |
| BNIP3L      | NM_004331.2 BNIP3L       | 8 Homo sapiens BNIP3a; NIX      | 0.00076128 | 0.00265945 | 1.29358937 |
| RNF4        | NM_002938.2 RNF4         | 4 Homo sapiens RES4-26; SNU     | 4.67E-05   | 0.00034307 | 1.29338152 |
| RRAS        | NM_006270.2 RRAS         | 19 Homo sapiens related RAS vi  | 7.00E-07   | 1.82E-05   | 1.29318591 |
| RHOB        | NM_004040.2 RHOB         | 2 Homo sapiens ARH6; MST08:     | 1.57E-07   | 6.95E-06   | 1.29308745 |
| FERMT2      | NM_006832.1 FERMT2       | 14 Homo sapiens KIND2; FLJ44:   | 4.83E-05   | 0.00035055 | 1.29307432 |
| ATP6V1D     | NM_015994.2 ATP6V1D      | 14 Homo sapiens ATP6M; VATD;    | 2.92E-07   | 1.00E-05   | 1.29205344 |
| TTC37       | NM_014639.2 TTC37        | 5 Homo sapiens MGC32587; T      | 0.00152151 | 0.00459454 | 1.29128458 |
| BPHL        | NM_004332.1 BPHL         | 6 Homo sapiens MGC125930; I     | 0.00266807 | 0.00706544 | 1.29101645 |
| BMP4        | NM_001202.2 BMP4         | 14 Homo sapiens BMP2B1; BMP:    | 1.36E-05   | 0.00013748 | 1.29057484 |
| SLC35A5     | NM_017945.2 SLC35A5      | 3 Homo sapiens FLJ25973; DK     | 0.00621316 | 0.01374127 | 1.29047724 |
| ASAP1       | NM_018482.2 ASAP1        | 8 Homo sapiens ZG14P; AMAP:     | 4.08E-06   | 6.04E-05   | 1.29024443 |
| TEX2        | NM_018469.3 TEX2         | 17 Homo sapiens KIAA1738; TM    | 3.29E-05   | 0.00026653 | 1.28947665 |
| ADCK2       | NM_052853.3 ADCK2        | 7 Homo sapiens MGC20727; A      | 0.00012144 | 0.00066291 | 1.28776512 |
| C9orf58     | NM_00100226 C9ORF58      | 9 Homo sapiens MGC29466; FI     | 0.01424085 | 0.02648803 | 1.28651062 |
| TMEM111     | NM_018447.1 TMEM111      | 3 Homo sapiens POB              | 0.00104278 | 0.00340534 | 1.28604401 |
| GRN         | NM_002087.2 GRN          | 17 Homo sapiens PEPI; PGRN; P   | 7.86E-05   | 0.00048954 | 1.28578676 |
| CALM1       | NM_006888.2 CALM1        | 14 Homo sapiens PHKD; CALML:    | 3.72E-07   | 1.21E-05   | 1.28546603 |
| TUBB2A      | TUBB TUBB2A              | 6 Homo sapiens TUBB; TUBB2;     | 1.23E-05   | 0.00012838 | 1.28539584 |
| SRXN1       | NM_080725.1 SRXN1        | 20 Homo sapiens Npn3; SRX1; (   | 9.13E-07   | 2.17E-05   | 1.28444784 |
| HCCA2       | NM_053005.2 HCCA2        | 11 Homo sapiens MOb2            | 0.01033706 | 0.02061343 | 1.2842189  |
| UROS        | NM_000375.1 UROS         | 10 Homo sapiens uroporphyrino   | 1.23E-06   | 2.64E-05   | 1.28318105 |
| CRIPAK      | NM_175918.2 CRIPAK       | 4 Homo sapiens FLJ34443         | 0.00460254 | 0.01085041 | 1.28305861 |
| SKIV2L      | NM_006929.4 SKIV2L       | 6 Homo sapiens SKIV2; DDX1:     | 0.00279748 | 0.00733841 | 1.28238961 |
| ITGA5       | NM_002205.2 ITGA5        | 12 Homo sapiens CD49e; VLA5A    | 0.00062637 | 0.00230136 | 1.28081893 |
| LSR         | NM_205834.2 LSR          | 19 Homo sapiens MGC48312; LI    | 0.00111226 | 0.00358482 | 1.27946519 |
| STK19       | NM_032454.1 STK19        | 6 Homo sapiens RP1; G11; D6:    | 0.00096783 | 0.00320292 | 1.2790142  |
| ALDH2       | NM_000690.2 ALDH2        | 12 Homo sapiens ALDM; ALDH-f    | 0.00090116 | 0.00303213 | 1.27826399 |
| SLC25A13    | NM_014251.1 SLC25A13     | 7 Homo sapiens CTLN2; ARALA     | 0.00591062 | 0.01320111 | 1.27813662 |
| ATP6V0E2    | NM_145234.1 ATP6V0E2     | 7 Homo sapiens ATP6V0E2L; C     | 2.88E-07   | 1.01E-05   | 1.27784003 |
| LOC10013413 | XM_00172085 LOC100134134 | PREDICTED: Homo sapiens s       | 2.45E-07   | 9.12E-06   | 1.27706577 |
| TSTA3       | NM_003313.2 TSTA3        | 8 Homo sapiens FX; P35B         | 0.00495072 | 0.01149176 | 1.27455553 |
| C12orf44    | NM_021934.3 C12ORF44     | 12 Homo sapiens FLJ11773        | 7.14E-06   | 8.88E-05   | 1.27432278 |
|             | Hs.534061 HS.534061      | 17 full-length cDNA clone XCL0E | 4.61E-06   | 6.56E-05   | 1.27355816 |
| EPHA1       | NM_005232.3 EPHA1        | 7 Homo sapiens EPHT; MGC16:     | 0.00068551 | 0.00246204 | 1.27338363 |
| LOC653297   | XM_926730.1 LOC653297 X  | PREDICTED: Homo sapiens s       | 0.01303042 | 0.02468444 | 1.27298984 |
| LHX2        | NM_004789.3 LHX2         | 9 Homo sapiens LH2; hLhx2; M    | 0.00012943 | 0.00069431 | 1.27253659 |
| FOXD2       | NM_004474.2 FOXD2        | 1 Homo sapiens FREAC-9; FKH     | 0.01566607 | 0.02851429 | 1.27238592 |
| SMAD5       | NM_005903.5 SMAD5        | 5 Homo sapiens Dwfc; DKFZp7     | 3.83E-05   | 0.00029719 | 1.27212038 |
| ZFHX3       | NM_006885.2 ZFHX3        | 16 Homo sapiens ATBF1; ZFHX3    | 0.0102477  | 0.02046528 | 1.27134614 |
| ASRGL1      | NM_025080.2 ASRGL1       | 11 Homo sapiens ALP1; ALP; FL   | 0.01686618 | 0.03018305 | 1.27132634 |
| FBXL18      | NM_024963.2 FBXL18       | Homo sapiens FLJ11467; FLJ      | 5.72E-05   | 0.00039237 | 1.27131922 |
| LOC10013442 | XR_038546.1 LOC100134424 | PREDICTED: Homo sapiens n       | 0.02913364 | 0.04612827 | 1.26964819 |
| PLCG1       | NM_182811.1 PLCG1        | 20 Homo sapiens PLC1; PLCgam    | 0.01678025 | 0.03010362 | 1.26875523 |
| NDRG3       | NM_022477.2 NDRG3        | 20 Homo sapiens FLJ13556        | 4.09E-05   | 0.00031197 | 1.26848935 |
| CYB5D2      | NM_144611.2 CYB5D2       | 17 Homo sapiens MGC32124        | 0.00182912 | 0.00527431 | 1.26807314 |
| RABEP1      | NM_004703.3 RABEP1       | 17 Homo sapiens RABPT5; RABP    | 3.14E-05   | 0.00025717 | 1.26738318 |
| C9orf5      | NM_032012.1 C9ORF5       | 9 Homo sapiens CG2; FLJ332:     | 9.25E-05   | 0.00054731 | 1.26716419 |
| TPRG1L      | NM_182752.3 TPRG1L       | 1 Homo sapiens RP11-46F15.3     | 4.29E-07   | 1.33E-05   | 1.26715465 |
| AXIN2       | NM_004655.2 AXIN2        | 17 Homo sapiens MGC126582; I    | 9.08E-05   | 0.00054135 | 1.26714582 |
| C20orf46    | NM_018354.1 C20ORF46     | 20 Homo sapiens FLJ11190        | 3.65E-05   | 0.00028722 | 1.26631783 |
| STAT2       | NM_005419.2 STAT2        | 12 Homo sapiens ISGF-3; STAT1   | 2.91E-05   | 0.00024377 | 1.26572209 |
| C9orf119    | XM_937771.1 C9ORF119     | 9 Homo sapiens bA395P17.9       | 0.0014532  | 0.00442639 | 1.26521105 |
| RNFT2       | NM_032814.3 RNFT2        | 12 Homo sapiens FLJ14627; TM    | 0.00014144 | 0.00073829 | 1.26475321 |
| IFNGR1      | NM_000416.1 IFNGR1       | 6 Homo sapiens CD119; IFNGF     | 7.69E-06   | 9.31E-05   | 1.26360721 |
| KIF1B       | NM_183416.2 KIF1B        | 1 Homo sapiens KIAA0591; HM     | 0.00150281 | 0.00455199 | 1.26338138 |
| ISG15       | NM_005101.1 ISG15        | 1 Homo sapiens G1P2; UCRP; I    | 5.78E-07   | 1.61E-05   | 1.26329615 |
| C1orf50     | NM_024097.1 C1ORF50      | 1 Homo sapiens MGC955           | 0.00067786 | 0.00243858 | 1.26301969 |
| FLYWCH2     | NM_138439.1 FLYWCH2      | 16 Homo sapiens FLYWCH family   | 0.00899738 | 0.01845668 | 1.26296035 |
| PPP1R2      | NM_006241.3 PPP1R2       | 3 Homo sapiens MGC87148; IF     | 9.19E-06   | 0.00010519 | 1.26290911 |
| TPST1       | NM_003596.2 TPST1        | 7 Homo sapiens tyrosylprotein   | 0.00345224 | 0.00864094 | 1.26273594 |
| SNAPC2      | NM_003083.1 SNAPC2       | 19 Homo sapiens PTFdelta; SNA   | 0.00023111 | 0.00106924 | 1.26211186 |
| LOC728014   | XM_946270.1 LOC728014    | 12 PREDICTED: Homo sapiens s    | 5.05E-05   | 0.00036047 | 1.26195743 |
| C2orf64     | NM_00100821 C2ORF64      | 2 Homo sapiens 6330578E17R      | 0.00164301 | 0.00486811 | 1.26139353 |
| SBF1        | NM_002972.1 SBF1         | 22 Homo sapiens DKFZp761D04     | 1.09E-05   | 0.00011784 | 1.2606742  |
| ID3         | NM_002167.2 ID3          | 1 Homo sapiens HEIR-1           | 2.52E-08   | 2.21E-06   | 1.25954736 |
| LAPTM4A     | NM_014713.3 LAPTM4A      | 2 Homo sapiens LAPTM4; KIAA     | 0.00027948 | 0.00123272 | 1.25936679 |

## 2.0 Upreg

|             |                                          |    |                                |            |            |            |
|-------------|------------------------------------------|----|--------------------------------|------------|------------|------------|
| PACSIN2     | NM_007229.2 PACSIN2                      | 22 | Homo sapiens SDPII             | 1.94E-06   | 3.61E-05   | 1.25920388 |
| ANXA2P3     | NR_001446.1 ANXA2P3                      | 10 | Homo sapiens ANX2L3; LIP2;     | 0.01292384 | 0.02454671 | 1.25889736 |
| HSPC157     | NR_023919.1 HSPC157                      | 1  | Homo sapiens hypothetical L    | 0.00174721 | 0.00510861 | 1.2586826  |
| GGH         | NM_003878.1 GGH                          | 8  | Homo sapiens GH                | 3.10E-06   | 4.98E-05   | 1.25688918 |
| SUPT5H      | NM_003169.2 SUPT5H                       | 19 | Homo sapiens SPT5H; SPT5;      | 0.00010081 | 0.00058153 | 1.25601473 |
| RNF165      | NM_152470.2 RNF165                       | 18 | Homo sapiens ring finger pro   | 0.02394532 | 0.03974308 | 1.25444012 |
| MUM1        | NM_032853.2 MUM1                         | 19 | Homo sapiens MGC163315; I      | 7.93E-06   | 9.51E-05   | 1.25418196 |
| FLNC        | NM_001458.2 FLNC                         | 7  | Homo sapiens FLN2; ABPL; A     | 7.32E-06   | 9.03E-05   | 1.25379348 |
| STX1A       | NM_004603.1 STX1A                        | 7  | Homo sapiens HPC-1; STX1;      | 0.00033562 | 0.00142039 | 1.25285666 |
| LPCAT3      | NM_005768.5 LPCAT3                       | 12 | Homo sapiens C3F; OACT5; r     | 1.69E-05   | 0.00016367 | 1.25213054 |
| PPIC        | NM_000943.4 PPIC                         | 5  | Homo sapiens MGC3673; CYI      | 0.0001476  | 0.0007642  | 1.25165056 |
| ADD3        | NM_019903.3 ADD3                         | 10 | Homo sapiens ADDL              | 0.0002698  | 0.00119876 | 1.25150887 |
| TOP3B       | NM_003935.3 TOP3B                        | 22 | Homo sapiens FLJ39376          | 0.00086508 | 0.00293711 | 1.25132046 |
| MGMT        | NM_002412.2 MGMT                         | 10 | Homo sapiens O-6-methylgu      | 0.0031719  | 0.00808258 | 1.25125937 |
| CMTM3       | NM_144601.2 CMTM3                        | 16 | Homo sapiens BNAS2; CKLF5      | 0.01423406 | 0.02648446 | 1.25039969 |
| UBE2E2      | NM_152653.1 UBE2E2                       | 3  | Homo sapiens FNCH8; FLJ25      | 0.00095033 | 0.00315942 | 1.24946866 |
| HNRPLL      | NM_138394.2 HNRPLL                       | 2  | Homo sapiens SRRF              | 0.00247013 | 0.00665147 | 1.24924943 |
| FAR1        | NM_032228.4 FAR1                         | 11 | Homo sapiens FLJ33561; FAF     | 0.00373353 | 0.00920927 | 1.24826383 |
| GPRC5A      | NM_003979.3 GPRC5A                       | 12 | Homo sapiens RAIG1; RAI3;      | 0.0037921  | 0.00930306 | 1.24783922 |
| SLC9A3R1    | NM_004252.1 SLC9A3R1                     | 17 | Homo sapiens NHERF1; NHEI      | 5.97E-07   | 1.65E-05   | 1.24695219 |
| ZFP90       | NM_133458.1 ZFP90                        | 16 | Homo sapiens ZNF756; NK10      | 0.00972761 | 0.0196505  | 1.24675987 |
| GUSBL1      | NM_00103352 GUSBL1                       | 6  | Homo sapiens bA239L20.5; t     | 0.00355491 | 0.008849   | 1.24612397 |
| TERC        | NR_001566.1 TERC                         | 3  | Homo sapiens TRC3; TR; hTF     | 0.0045061  | 0.01066238 | 1.24521952 |
| TUBB4Q      | NM_020040.3 TUBB4Q<br>Hs.14555 HS.14555  | 4  | Homo sapiens tubulin, beta p   | 2.44E-05   | 0.00021485 | 1.2447552  |
| C16orf56    | NM_025082.1 C16ORF56                     | 10 | Homo sapiens cDNA: FLJ215      | 0.00074929 | 0.00263451 | 1.24443455 |
| PSMD3       | NM_002809.2 PSMD3                        | 16 | Homo sapiens FLJ13111          | 0.00051011 | 0.00195896 | 1.24413872 |
| H1FX        | NM_006026.2 H1FX                         | 17 | Homo sapiens RPN3; P58; S1     | 0.01018655 | 0.02038059 | 1.24398001 |
| CMAS        | NM_018686.3 CMAS                         | 3  | Homo sapiens MGC8350; H1       | 0.00018003 | 0.00088892 | 1.24393421 |
| UCRC        | NM_00100368 UCRC                         | 12 | Homo sapiens cytidine mono     | 2.54E-06   | 4.35E-05   | 1.24347141 |
| CTSA        | NM_000308.1 CTSA                         | 22 | Homo sapiens HSPC151; HSF      | 0.00028469 | 0.00125061 | 1.24345823 |
| SGTA        | NM_003021.3 SGTA                         | 20 | Homo sapiens NGBE; PPCA; r     | 0.00325382 | 0.00823534 | 1.24339648 |
| LZTR1       | NM_006767.2 LZTR1                        | 19 | Homo sapiens hSGT; SGT         | 0.00432222 | 0.01029225 | 1.24306129 |
| FLOT1       | NM_005803.2 FLOT1                        | 22 | Homo sapiens MGC21205; TC      | 5.01E-06   | 6.90E-05   | 1.2430498  |
| LOC10013009 | XR_039545.1 LOC10013009                  | 6  | Homo sapiens flotillin 1 (FLO) | 4.68E-05   | 0.00034342 | 1.24282622 |
| OBFC2A      | NM_022837.1 OBFC2A                       | 8  | PREDICTED: Homo sapiens n      | 0.00328573 | 0.00829293 | 1.24275287 |
| SMAP2       | NM_022733.1 SMAP2                        | 2  | Homo sapiens MGC111163; I      | 0.00033746 | 0.00142592 | 1.24225571 |
| NUCB2       | NM_005013.1 NUCB2                        | 1  | Homo sapiens SMAP1L; RP1-      | 5.82E-05   | 0.00039577 | 1.24153402 |
| CCDC50      | NM_174908.2 CCDC50                       | 11 | Homo sapiens NEFA              | 0.00042153 | 0.00169423 | 1.24145572 |
| KRT18P28    | XR_017689.1 KRT18P28                     | 3  | Homo sapiens C3orf6; DFNA-     | 0.00035186 | 0.00147532 | 1.24132717 |
| TESC        | NM_017899.1 TESC                         | 1  | PREDICTED: Homo sapiens n      | 0.00338549 | 0.00849735 | 1.24131622 |
| LAMC1       | NM_002293.2 LAMC1                        | 12 | Homo sapiens TSC; FLJ2060      | 0.00028079 | 0.00123599 | 1.24114286 |
| ITGA2       | NM_002203.2 ITGA2                        | 1  | Homo sapiens LAMB2; MGC8       | 1.10E-06   | 2.46E-05   | 1.24074076 |
| HSPA5       | NM_005347.2 HSPA5                        | 5  | Homo sapiens CD49B; VLAA-      | 0.01163353 | 0.02265423 | 1.24048056 |
| SNORA12     | NR_002954.1 SNORA12                      | 9  | Homo sapiens BIP; FLJ26106     | 3.89E-05   | 0.00030018 | 1.24022959 |
| PPM1D       | NM_003620.2 PPM1D                        | 10 | Homo sapiens U108              | 3.46E-07   | 1.16E-05   | 1.2398526  |
| ANKRD13A    | NM_033121.1 ANKRD13A                     | 17 | Homo sapiens PP2C-DELTA; \     | 0.0004802  | 0.00186987 | 1.23985196 |
| C9orf69     | NM_152833.2 C9ORF69                      | 12 | Homo sapiens ANKRD13; NY-      | 0.01242385 | 0.02381348 | 1.23953221 |
| CPNE1       | NM_003915.2 CPNE1                        | 9  | Homo sapiens bA83N9.1          | 0.00671604 | 0.01464484 | 1.23949392 |
| ZBTB17      | NM_003443.1 ZBTB17                       | 20 | Homo sapiens CPN1; COPN1;      | 7.06E-06   | 8.85E-05   | 1.2390604  |
| CSAG3A      | NM_203311.1 CSAG3A X                     | 1  | Homo sapiens ZNF60; pHZ-6      | 0.00469425 | 0.01100218 | 1.23777254 |
| CRK         | NM_016823.2 CRK                          | 1  | Homo sapiens MGC17065          | 0.01554137 | 0.0283443  | 1.23770814 |
| MTIF3       | NM_152912.3 MTIF3                        | 17 | Homo sapiens CRKII             | 4.22E-05   | 0.00031948 | 1.23742015 |
| KIFC2       | NM_145754.2 KIFC2                        | 13 | Homo sapiens IF-3mt; IF3(m     | 9.08E-05   | 0.00054137 | 1.23602811 |
| C17orf63    | NM_018182.1 C17ORF63                     | 8  | Homo sapiens kinesin family    | 4.03E-06   | 6.00E-05   | 1.23592311 |
| NTAN1       | NM_173474.2 NTAN1<br>Hs.374278 HS.374278 | 17 | Homo sapiens FLJ10700          | 0.02415739 | 0.04002173 | 1.23563481 |
| PTK7        | NM_152880.2 PTK7                         | 16 | Homo sapiens DKFZp666E05       | 0.00164768 | 0.0048753  | 1.23543974 |
| LOC730455   | NM_015027.1 LOC730455                    | 16 | Homo sapiens cDNA FLJ3838      | 0.00921781 | 0.01880946 | 1.23470498 |
| RAB40B      | NM_006822.1 RAB40B                       | 6  | Homo sapiens CCK4              | 0.00536405 | 0.01220868 | 1.23452407 |
| CD9         | NM_001769.2 CD9                          | 17 | PREDICTED: Homo sapiens s      | 0.00033216 | 0.00140959 | 1.23364237 |
| CDKN1A      | NM_078467.1 CDKN1A                       | 12 | Homo sapiens FLJ42385; SEI     | 2.03E-05   | 0.00018805 | 1.23362123 |
| NKD2        | NM_033120.2 NKD2                         | 12 | Homo sapiens MRP-1; MIC3;      | 7.44E-05   | 0.00047047 | 1.2335332  |
| CREB3L2     | NM_194071.2 CREB3L2                      | 6  | Homo sapiens P21; MDA-6; S     | 1.41E-06   | 2.92E-05   | 1.23341977 |
| STK38       | NM_007271.2 STK38                        | 5  | Homo sapiens Naked2            | 1.95E-05   | 0.00018205 | 1.23316207 |
| PI4KAP2     | NM_199345.2 PI4KAP2                      | 7  | Homo sapiens MGC131709; I      | 7.62E-05   | 0.00047872 | 1.23297042 |
| C3orf52     | NM_024616.1 C3ORF52                      | 6  | Homo sapiens NDR1; NDR         | 0.00105457 | 0.00343249 | 1.23275593 |
| CORO1C      | NM_014325.2 CORO1C                       | 1  | Homo sapiens FLJ44912; MG      | 6.08E-06   | 7.93E-05   | 1.23242492 |
| LSMD1       | NM_032356.3 LSMD1                        | 3  | Homo sapiens FLJ23186; TTF     | 0.01750008 | 0.03102118 | 1.23188353 |
| C16orf57    | NM_024598.2 C16ORF57                     | 12 | Homo sapiens HCRNN4; coro      | 4.99E-05   | 0.00035774 | 1.23184483 |
|             |                                          | 17 | Homo sapiens PFAAP2; MGC1      | 1.11E-05   | 0.0001196  | 1.23174151 |
|             |                                          | 16 | Homo sapiens FLJ13154          | 7.03E-06   | 8.84E-05   | 1.2317126  |

## 2.0 Upreg

|           |                       |   |                                |            |            |            |
|-----------|-----------------------|---|--------------------------------|------------|------------|------------|
| TMEM158   | NM_015444.1 TMEM158   |   | 3 Homo sapiens BBP; DKFZp58    | 3.71E-07   | 1.21E-05   | 1.23090534 |
| PLEKHG4   | NM_015432.2 PLEKHG4   |   | 16 Homo sapiens puratrophin1;  | 0.01659455 | 0.02983451 | 1.23087435 |
| CKB       | NM_001823.3 CKB       |   | 14 Homo sapiens B-CK; CKBB     | 2.54E-07   | 9.34E-06   | 1.23082301 |
| INTS12    | NM_020395.2 INTS12    |   | 4 Homo sapiens PHF22; INT12    | 3.84E-05   | 0.00029762 | 1.22967403 |
| MT1E      | NM_175617.2 MT1E      |   | 16 Homo sapiens MT1; MTD       | 4.75E-06   | 6.67E-05   | 1.22907924 |
| RAB5C     | NM_201434.1 RAB5C     |   | 17 Homo sapiens RAB5CL; RABL   | 0.00118509 | 0.00376596 | 1.22870072 |
| DPYSL2    | NM_001386.4 DPYSL2    |   | 8 Homo sapiens DHPRP2; DRP-    | 7.98E-07   | 1.97E-05   | 1.22856304 |
| FGFR3     | NM_000142.2 FGFR3     |   | 4 Homo sapiens HSGFR3EX; J     | 3.70E-05   | 0.00028958 | 1.22835762 |
| EFNB2     | NM_004093.2 EFNB2     |   | 13 Homo sapiens MGC126227; I   | 1.05E-05   | 0.00011534 | 1.22828476 |
| ELOF1     | NM_032377.2 ELOF1     |   | 19 Homo sapiens ELF1           | 0.00091374 | 0.00306782 | 1.22767556 |
| FLJ20021  | XM_028217.4 FLJ20021  |   | 4 PREDICTED: Homo sapiens h    | 0.00028879 | 0.00126146 | 1.22734962 |
| STUB1     | NM_005861.2 STUB1     |   | 16 Homo sapiens CHIP; SDCCAC   | 1.17E-05   | 0.00012311 | 1.22678393 |
| ALS2      | NM_020919.2 ALS2      |   | 2 Homo sapiens MGC87187; IA    | 0.00122175 | 0.00384757 | 1.22609398 |
| SH3BGR13  | NM_031286.2 SH3BGR13  |   | 1 Homo sapiens TIP-B1; SH3BI   | 0.00116962 | 0.00373536 | 1.22592147 |
| RUNX3     | NM_004350.1 RUNX3     |   | 1 Homo sapiens FLJ34510; MG    | 0.00375374 | 0.00924443 | 1.22406782 |
| FRMD8     | NM_031904.3 FRMD8     |   | 11 Homo sapiens MGC31785; FI   | 0.00329844 | 0.0083192  | 1.2232835  |
| PINK1     | NM_032409.1 PINK1     |   | 1 Homo sapiens FLJ27236; PA    | 0.0017892  | 0.00519364 | 1.22305184 |
| LOC149501 | XR_017100.2 LOC149501 |   | 1 PREDICTED: Homo sapiens n    | 3.50E-07   | 1.16E-05   | 1.2226984  |
| MTMR9     | NM_015458.3 MTMR9     |   | 8 Homo sapiens LIP-STYX; C8c   | 0.00114199 | 0.00366111 | 1.22242139 |
| SPIRE1    | NM_020148.1 SPIRE1    |   | 18 Homo sapiens CHIP; MGC11    | 0.0002229  | 0.00104235 | 1.22218395 |
| IGFBP2    | NM_000597.2 IGFBP2    |   | 2 Homo sapiens IGF-BP53; IBP   | 6.63E-05   | 0.00043602 | 1.22211271 |
| RHBDD2    | NM_00104045 RHBDD2    |   | 7 Homo sapiens NPD007; RHBI    | 1.81E-06   | 3.45E-05   | 1.22206339 |
| PIK4CA    | NM_058004.1 PIK4CA    |   | 22 Homo sapiens pi4K230; FLJ1  | 0.00022257 | 0.00104128 | 1.22200735 |
| PDLIM1    | NM_020992.2 PDLIM1    |   | 10 Homo sapiens CLP36; CLP-3   | 1.48E-05   | 0.00014698 | 1.22199004 |
| NUDT22    | NM_032344.1 NUDT22    |   | 11 Homo sapiens MGC13045       | 0.0080869  | 0.01695379 | 1.2217272  |
| C20orf3   | NM_020531.2 C20ORF3   |   | 20 Homo sapiens BSCv; APMAP    | 4.64E-05   | 0.00034094 | 1.22092371 |
| GPR137    | NM_020155.2 GPR137    |   | 11 Homo sapiens GPR137A; TM    | 0.00049253 | 0.00190693 | 1.22065834 |
| CKLF      | NM_016326.2 CKLF      |   | 16 Homo sapiens UCK-1; CKLF1   | 8.92E-06   | 0.0001028  | 1.22053587 |
| CDKN3     | NM_005192.2 CDKN3     |   | 14 Homo sapiens CD11; KAP; M   | 7.05E-06   | 8.84E-05   | 1.21976893 |
| APPBP2    | NM_006380.2 APPBP2    |   | 17 Homo sapiens PAT1; KIAA02   | 0.00041593 | 0.00167918 | 1.21958531 |
| MMD       | NM_012329.2 MMD       |   | 17 Homo sapiens PAQR11; MMA    | 6.78E-06   | 8.66E-05   | 1.21940646 |
| LIMA1     | NM_016357.3 LIMA1     |   | 12 Homo sapiens SREBP3; EPLI   | 0.00107167 | 0.00347772 | 1.21926236 |
| CHMP2A    | NM_198426.1 CHMP2A    |   | 19 Homo sapiens VPS2; VPS2A;   | 7.15E-05   | 0.00045786 | 1.2191341  |
|           | Hs.475334 HS.475334   |   | 11 Human mRNA for KIAA0280     | 0.0008472  | 0.00288723 | 1.21870035 |
| CDH1      | NM_004360.2 CDH1      |   | 16 Homo sapiens CDHE; Arc-1;   | 8.05E-06   | 9.61E-05   | 1.21855076 |
| MAOB      | NM_000898.3 MAOB      | X | Homo sapiens MGC26382          | 0.00021491 | 0.00101418 | 1.21743354 |
| ABCB9     | NM_203444.1 ABCB9     |   | 12 Homo sapiens TAPL; KIAA15   | 0.00166285 | 0.00490549 | 1.21630778 |
| RPL23AP13 | NR_002229.1 RPL23AP13 |   | 2 Homo sapiens DKFZp547101     | 0.01354922 | 0.02544106 | 1.21626393 |
| TIMP1     | NM_003254.2 TIMP1     | X | Homo sapiens TIMP; FLJ9037     | 2.12E-07   | 8.42E-06   | 1.2162416  |
| C16orf48  | NM_032140.1 C16ORF48  |   | 16 Homo sapiens DAKV6410; DI   | 2.32E-05   | 0.00020643 | 1.21602332 |
| PIAS1     | NM_016166.1 PIAS1     |   | 15 Homo sapiens MGC141879; J   | 0.00157503 | 0.00471554 | 1.21530674 |
| GNPTG     | NM_032520.3 GNPTG     |   | 16 Homo sapiens GNPTAG; LP2E   | 0.00296131 | 0.00767554 | 1.2152728  |
| PTTG1IP   | NM_004339.2 PTTG1IP   |   | 21 Homo sapiens C21orf3; C21c  | 8.58E-06   | 0.0001003  | 1.21501086 |
| HEBP1     | NM_015987.3 HEBP1     |   | 12 Homo sapiens HBP; HEBP      | 9.94E-05   | 0.00057593 | 1.21453178 |
| PRUNE     | NM_021222.1 PRUNE     |   | 1 Homo sapiens DRES-17; HTC    | 0.02596685 | 0.04231    | 1.21381093 |
| UBTD1     | NM_024954.3 UBTD1     |   | 10 Homo sapiens FLJ11807       | 0.00497043 | 0.01152028 | 1.21353903 |
| HLA-H     | NR_001434.1 HLA-H     |   | 6 Homo sapiens HLAHP           | 5.01E-05   | 0.00035818 | 1.21331877 |
| GDI1      | NM_001493.1 GDI1      | X | Homo sapiens OPHN2; MRX4       | 4.10E-05   | 0.00031257 | 1.21276514 |
| PRRC1     | NM_130809.2 PRRC1     |   | 5 Homo sapiens FLJ32875        | 0.00032862 | 0.00139782 | 1.21225091 |
| THYN1     | NM_014174.2 THYN1     |   | 11 Homo sapiens MY105; MGC1    | 0.00069098 | 0.00247841 | 1.21213678 |
| ATP6V0A1  | NM_005177.2 ATP6V0A1  |   | 17 Homo sapiens ATP6N1; VPP1   | 1.16E-06   | 2.56E-05   | 1.21183928 |
| SPHK2     | NM_020126.3 SPHK2     |   | 19 Homo sapiens sphingosine ki | 0.00352761 | 0.0087992  | 1.21157995 |
| C14orf2   | NM_004894.1 C14ORF2   |   | 14 Homo sapiens PLPM; MP68     | 7.30E-05   | 0.00046445 | 1.21151817 |
| ATP6AP2   | NM_005765.2 ATP6AP2   | X | Homo sapiens ELDF10; APT6      | 3.99E-07   | 1.27E-05   | 1.21124589 |
| FNDC3B    | NM_00113509 FNDC3B    |   | 3 Homo sapiens fibronectin typ | 0.00023221 | 0.00107255 | 1.21049738 |
| ALDOC     | NM_005165.2 ALDOC     |   | 17 Homo sapiens ALDC           | 7.08E-06   | 8.85E-05   | 1.20985387 |
| TMEM41B   | NM_015012.1 TMEM41B   |   | 11 Homo sapiens MGC33897; Ki   | 3.48E-06   | 5.44E-05   | 1.20917869 |
| C5orf32   | NM_032412.2 C5ORF32   |   | 5 Homo sapiens ORF1-FL49       | 0.00029129 | 0.00126883 | 1.2089001  |
| LYPLAL1   | NM_138794.1 LYPLAL1   |   | 1 Homo sapiens KIAA1238        | 1.02E-05   | 0.00011292 | 1.20712241 |
| RALY      | NM_007367.2 RALY      |   | 20 Homo sapiens P542; MGC11    | 4.78E-05   | 0.00034772 | 1.20677359 |
| LOC648980 | XM_941280.2 LOC648980 |   | 22 PREDICTED: Homo sapiens s   | 0.01615506 | 0.02923296 | 1.20677042 |
| NLGN2     | NM_020795.2 NLGN2     |   | 17 Homo sapiens KIAA1366       | 0.00304169 | 0.0078186  | 1.20658791 |
| C1orf115  | NM_024709.2 C1ORF115  |   | 1 Homo sapiens FLJ14146; RP-   | 0.00075448 | 0.00264849 | 1.20654264 |
| MFSD3     | NM_138431.1 MFSD3     |   | 8 Homo sapiens major facilitat | 6.54E-06   | 8.40E-05   | 1.20622264 |
| MAPRE2    | NM_014268.1 MAPRE2    |   | 18 Homo sapiens RP1; EB1; EB2  | 0.00039611 | 0.00161415 | 1.20622196 |
| XPR1      | NM_004736.3 XPR1      |   | 1 Homo sapiens xenotropic anc  | 0.00012978 | 0.00069548 | 1.20580112 |
| INTS5     | NM_030628.1 INTS5     |   | 11 Homo sapiens INT5; KIAA16   | 0.0023749  | 0.00644456 | 1.2053578  |
| MLXIPL    | NM_032994.1 MLXIPL    |   | 7 Homo sapiens WS-bHLH; MIC    | 0.00197311 | 0.00558141 | 1.20523309 |
| LOC441763 | XM_930284.1 LOC441763 |   | 16 PREDICTED: Homo sapiens h   | 0.00013189 | 0.00070297 | 1.20509592 |
| MANBA     | NM_005908.2 MANBA     |   | 4 Homo sapiens MANB1           | 0.00171837 | 0.00504327 | 1.20451616 |

2.0 Upreg

|           |             |           |    |                              |            |            |            |
|-----------|-------------|-----------|----|------------------------------|------------|------------|------------|
| PSMD13    | NM_002817.2 | PSMD13    | 11 | Homo sapiens HSPC027; p4C    | 0.00564616 | 0.01271498 | 1.20446329 |
| LOC643431 | XM_928128.1 | LOC643431 | 5  | PREDICTED: Homo sapiens s    | 8.67E-05   | 0.00052335 | 1.20382065 |
| DUSP1     | NM_004417.2 | DUSP1     | 5  | Homo sapiens HVH1; MKP1;     | 5.70E-05   | 0.00039187 | 1.20364937 |
| SPC24     | NM_182513.1 | SPC24     | 19 | Homo sapiens SPBC24; FLJ9    | 0.00222929 | 0.00611817 | 1.20351457 |
| ANAPC11   | XM_942695.1 | ANAPC11   |    | PREDICTED: Homo sapiens A    | 0.00156629 | 0.00469843 | 1.20347588 |
| VGLL4     | NM_014667.1 | VGLL4     | 3  | Homo sapiens VGL-4; KIAA0    | 0.00264489 | 0.0070246  | 1.20220659 |
| LEP       | NM_000230.1 | LEP       | 7  | Homo sapiens OB; OBS         | 0.00656761 | 0.01438468 | 1.20213026 |
| AFMID     | NM_00101098 | AFMID     | 17 | Homo sapiens KF; DKFZp686    | 0.0318102  | 0.04922586 | 1.20168901 |
| DIABLO    | NM_138930.2 | DIABLO    | 12 | Homo sapiens SMAC; FLJ105    | 8.59E-06   | 0.00010024 | 1.20113449 |
| ATP1B3    | NM_001679.2 | ATP1B3    |    | PREDICTED: Homo sapiens A    | 1.66E-06   | 3.31E-05   | 1.20113208 |
| FBXO31    | NM_024735.2 | FBXO31    | 16 | Homo sapiens FBX14; Fbx31    | 7.09E-05   | 0.00045565 | 1.20110659 |
| MTMR10    | NM_017762.1 | MTMR10    | 15 | Homo sapiens FLJ20313        | 0.00316871 | 0.00807824 | 1.20110262 |
| SNX2      | NM_003100.2 | SNX2      | 5  | Homo sapiens TRG-9; MGC5;    | 4.31E-05   | 0.00032417 | 1.2010261  |
| CCDC23    | NM_199342.1 | CCDC23    | 1  | Homo sapiens coiled-coil don | 6.89E-06   | 8.72E-05   | 1.19920498 |
| FKBP11    | NM_016594.1 | FKBP11    | 12 | Homo sapiens MGC54182; F     | 0.02971203 | 0.04677827 | 1.19907976 |
| KIAA0494  | NM_014774.1 | KIAA0494  | 1  | Homo sapiens RP11-8J9.3      | 0.00129886 | 0.00404124 | 1.19805669 |
| TTC1      | NM_003314.1 | TTC1      | 5  | Homo sapiens TPR1            | 0.00199535 | 0.00563112 | 1.19804761 |
| CDC42     | NM_044472.1 | CDC42     | 1  | Homo sapiens CDC42Hs; G2!    | 0.00106607 | 0.00346266 | 1.19791732 |
| C12orf31  | NM_032338.2 | C12ORF31  | 12 | Homo sapiens MGC104302; I    | 0.00038004 | 0.00156035 | 1.19781384 |
| PDIA4     | NM_004911.3 | PDIA4     | 7  | Homo sapiens ERP72; ERP70    | 0.02017111 | 0.03467019 | 1.19707393 |
| FAM107B   | NM_031453.2 | FAM107B   | 10 | Homo sapiens FLJ45505; C10   | 0.01475844 | 0.02721784 | 1.19706054 |
| DCTN3     | NM_024348.2 | DCTN3     | 9  | Homo sapiens MGC111190; I    | 0.00044117 | 0.00175242 | 1.1968891  |
| PTGR1     | NM_012212.2 | PTGR1     | 9  | Homo sapiens MGC34943        | 0.00010737 | 0.0006084  | 1.19667316 |
| AGPAT2    | NM_00101272 | AGPAT2    | 9  | Homo sapiens LPAAB; LPAAT-   | 0.00029789 | 0.0012919  | 1.19661911 |
| SFRS7     | NM_00103168 | SFRS7     | 2  | Homo sapiens 9G8; HSSG1;     | 0.00025118 | 0.00113129 | 1.1961977  |
| GIPC1     | NM_202468.1 | GIPC1     | 19 | Homo sapiens IIP-1; TIP-2; ( | 1.31E-05   | 0.00013383 | 1.19616785 |
| BLVRA     | NM_000712.3 | BLVRA     | 7  | Homo sapiens BVRA; BLVR      | 2.79E-05   | 0.0002369  | 1.19587007 |
| POMT2     | NM_013382.3 | POMT2     | 14 | Homo sapiens FLJ22309; DK    | 0.00284109 | 0.00741879 | 1.19540743 |
| BRSK1     | NM_032430.1 | BRSK1     | 19 | Homo sapiens KIAA1811; FL    | 0.00250738 | 0.00672015 | 1.19510457 |
| MFSD11    | NM_024311.2 | MFSD11    | 17 | Homo sapiens ET; FLJ22196;   | 0.01485078 | 0.02734637 | 1.19488853 |
| MTRF1L    | NM_019041.3 | MTRF1L    | 6  | Homo sapiens MGC102748       | 6.25E-05   | 0.00041614 | 1.19471263 |
| RICH2     | NM_014859.4 | RICH2     | 17 | Homo sapiens NPC-A-10; KIA   | 0.00186434 | 0.0053475  | 1.19454252 |
| HITF      | NM_003071.2 | HITF      | 3  | Homo sapiens ZBU1; SMARC     | 0.00027854 | 0.00122955 | 1.1942091  |
| RYBP      | NM_012234.3 | RYBP      | 3  | Homo sapiens DEDAF; YEAF1    | 0.00066551 | 0.00240292 | 1.19388134 |
| GABARAPL1 | NM_031412.2 | GABARAPL1 | 12 | Homo sapiens ATG8L; GEC1;    | 0.00299087 | 0.00772819 | 1.19375746 |
| FAM50A    | NM_004699.1 | FAM50A    |    | Homo sapiens DGS9928E; 9F    | 3.69E-06   | 5.66E-05   | 1.19360902 |
| MTMR11    | NM_006697.1 | MTMR11    | 1  | Homo sapiens CRA; RP11-21    | 0.02127969 | 0.03622047 | 1.1930976  |
| STX3      | NM_004177.3 | STX3      | 11 | Homo sapiens STX3A           | 0.00084206 | 0.0028733  | 1.19303767 |
| ACSL3     | NM_004457.3 | ACSL3     | 2  | Homo sapiens PRO2194; FAC    | 0.00010149 | 0.00058423 | 1.19294095 |
| DPYSL3    | NM_001387.2 | DPYSL3    | 5  | Homo sapiens DRP3; CRMP4;    | 8.83E-05   | 0.00053192 | 1.19292879 |
| ZNF277    | NM_021994.1 | ZNF277    | 7  | Homo sapiens ZNF277P; ZNF    | 0.00030146 | 0.00130268 | 1.19271162 |
| PRAGMIN   | NM_00108082 | PRAGMIN   | 8  | Homo sapiens DKFZp761P04     | 5.24E-05   | 0.000369   | 1.19216298 |
| EGR1      | NM_001964.2 | EGR1      | 5  | Homo sapiens G0S30; AT225    | 4.06E-06   | 6.03E-05   | 1.19198961 |
| WDR45L    | NM_019613.2 | WDR45L    | 17 | Homo sapiens WIPI-3; WIPI3   | 0.00312537 | 0.00798836 | 1.19192541 |
| LUZP1     | NM_033631.2 | LUZP1     | 1  | Homo sapiens KIAA0601; LU    | 4.33E-05   | 0.0003249  | 1.19191532 |
| AP4B1     | NM_006594.1 | AP4B1     | 1  | Homo sapiens BETA-4          | 0.00113519 | 0.0036436  | 1.19166525 |
| FBXO46    | XM_942691.1 | FBXO46    | 19 | PREDICTED: Homo sapiens F    | 0.02441157 | 0.0403383  | 1.19160219 |
| PSAP      | NM_002778.1 | PSAP      | 10 | Homo sapiens GLBA; SAP1; I   | 8.32E-07   | 2.03E-05   | 1.19157324 |
| LOC647037 | XM_930029.1 | LOC647037 | 15 | PREDICTED: Homo sapiens s    | 0.00044614 | 0.00176699 | 1.19156716 |
| BSC12     | NM_032667.4 | BSC12     | 11 | Homo sapiens SPG17; MGC4     | 5.00E-05   | 0.00035785 | 1.19117115 |
| PLCG2     | NM_002661.1 | PLCG2     | 16 | Homo sapiens phospholipase   | 6.03E-05   | 0.00040493 | 1.1911564  |
| SEPX1     | NM_016332.2 | SEPX1     | 16 | Homo sapiens MSR1; SELR;     | 0.00013483 | 0.00071269 | 1.19051094 |
| ACTR10    | NM_018477.1 | ACTR10    | 14 | Homo sapiens HARP11; ACTF    | 0.00016229 | 0.00081998 | 1.19003318 |
| SND1      | NM_014390.2 | SND1      | 7  | Homo sapiens TDRD11; p100    | 0.00036456 | 0.00151225 | 1.18998993 |
| MSX1      | NM_002448.1 | MSX1      | 4  | Homo sapiens HOX7; HYD1      | 5.27E-06   | 7.16E-05   | 1.18980723 |
| LOC647954 | XM_938141.1 | LOC647954 |    | PREDICTED: Homo sapiens n    | 7.04E-05   | 0.0004539  | 1.18953871 |
| TMEM141   | NM_032928.2 | TMEM141   | 9  | Homo sapiens MGC14141; RI    | 0.00147536 | 0.00448633 | 1.18951065 |
| LOC340598 | XM_926996.1 | LOC340598 |    | PREDICTED: Homo sapiens s    | 0.00421135 | 0.01007905 | 1.18938926 |
| CLSTN1    | NM_00100956 | CLSTN1    | 1  | Homo sapiens CSTN1; PIK3C    | 0.00011504 | 0.00063854 | 1.18919727 |
| AKR1B1    | NM_001628.2 | AKR1B1    | 7  | Homo sapiens ALDR1; MGC1     | 1.93E-05   | 0.00017991 | 1.18865368 |
| LLGL1     | NM_004140.3 | LLGL1     | 17 | Homo sapiens HUGL; LLGL; I   | 0.00096183 | 0.00319082 | 1.18783353 |
| SLC1A5    | NM_005628.1 | SLC1A5    | 19 | Homo sapiens M7V1; ATBO;     | 0.00015661 | 0.00079868 | 1.18753232 |
| ROBO3     | NM_022370.2 | ROBO3     | 11 | Homo sapiens HGPS; HGPPS     | 0.00579794 | 0.01299752 | 1.18727218 |
| RRAGA     | NM_006570.4 | RRAGA     | 9  | Homo sapiens RAGA; FIP-1     | 6.27E-06   | 8.13E-05   | 1.18602031 |
| NAT14     | NM_020378.2 | NAT14     | 19 | Homo sapiens KLP1            | 0.00252029 | 0.00674811 | 1.18464956 |
| IL10RB    | NM_000628.3 | IL10RB    | 21 | Homo sapiens IL-10R2; CRF2   | 0.00760253 | 0.0161344  | 1.18448088 |
| FOXC1     | NM_001453.1 | FOXC1     | 6  | Homo sapiens FREAC3; FKHL    | 9.98E-07   | 2.31E-05   | 1.18387726 |
| GNAI2     | NM_002070.2 | GNAI2     | 3  | Homo sapiens H_LUCA16.1;     | 8.21E-05   | 0.00050292 | 1.18367428 |
| LCOR      | NM_032440.1 | LCOR      | 10 | Homo sapiens FLJ38026; ML    | 0.0002336  | 0.00107667 | 1.18303383 |
| CASP3     | NM_032991.2 | CASP3     | 4  | Homo sapiens CPP32B; SCA-    | 0.02136892 | 0.03632683 | 1.18296617 |



2.0 Upreg

|           |                       |   |                                 |            |            |            |
|-----------|-----------------------|---|---------------------------------|------------|------------|------------|
| CLP1      | NM_006831.1 CLP1      |   | 11 Homo sapiens HEAB; hClp1     | 0.00250766 | 0.00671925 | 1.18231104 |
| SSR1      | NM_003144.2 SSR1      |   | 6 Homo sapiens DKFZp781N23      | 0.00017798 | 0.00088124 | 1.18210763 |
| ALG13     | NM_018466.2 ALG13     | X | Homo sapiens YGL047W; GLI       | 0.00281799 | 0.00737263 | 1.18198109 |
| GSTP1     | NM_000852.2 GSTP1     |   | 11 Homo sapiens DFN7; GST3; I   | 1.07E-06   | 2.42E-05   | 1.18180011 |
| CLTA      | NM_007096.1 CLTA      |   | 9 Homo sapiens LCA              | 3.17E-05   | 0.00025919 | 1.18151372 |
| TMEM49    | NM_030938.2 TMEM49    |   | 17 Homo sapiens VMP1; DKFZP!    | 0.00019329 | 0.00093695 | 1.18138619 |
| METR1     | NM_024042.2 METR1     |   | 16 Homo sapiens c380A1.2; MG    | 0.00457545 | 0.01079591 | 1.18130701 |
| SAT1      | NM_002970.1 SAT1      | X | Homo sapiens KFSD; SSAT-1       | 5.09E-06   | 6.99E-05   | 1.18117249 |
| WDR54     | NM_032118.2 WDR54     |   | 2 Homo sapiens FLJ12953         | 5.71E-05   | 0.00039193 | 1.18002996 |
| CERK      | NM_182661.1 CERK      |   | 22 Homo sapiens KIAA1646; dA    | 0.00050553 | 0.00194551 | 1.17961469 |
| SPATA2L   | NM_152339.2 SPATA2L   |   | 16 Homo sapiens MGC26885; C     | 0.00020466 | 0.00097812 | 1.179572   |
| FAM117B   | NM_173511.2 FAM117B   |   | 2 Homo sapiens FLJ38771; DK     | 0.00280086 | 0.00734549 | 1.17874259 |
| HINT2     | NM_032593.2 HINT2     |   | 9 Homo sapiens HIT-17           | 0.00236646 | 0.00642808 | 1.17800371 |
| PALM      | NM_002579.1 PALM      |   | 19 Homo sapiens KIAA0270        | 0.00722872 | 0.01548625 | 1.17782193 |
| LGALS1    | NM_002305.2 LGALS1    |   | 22 Homo sapiens DKFZp686E23     | 5.93E-07   | 1.65E-05   | 1.17763173 |
| TSC22D2   | NM_014779.2 TSC22D2   |   | 3 Homo sapiens KIAA0669; TII    | 0.00711162 | 0.01530174 | 1.17710771 |
| RNF20     | NM_019592.5 RNF20     |   | 9 Homo sapiens BRE1A; MGC1      | 0.0001552  | 0.00079299 | 1.17631833 |
| C17orf96  | NM_00113067.C17ORF96  |   | 17 Homo sapiens chromosome 1    | 0.00061207 | 0.00226876 | 1.17600624 |
| ATOX1     | NM_004045.3 ATOX1     |   | 5 Homo sapiens MGC138453; I     | 4.85E-05   | 0.00035171 | 1.17595936 |
| TUBA4A    | NM_006000.1 TUBA4A    |   | 2 Homo sapiens TUBA1; H2-AL     | 0.00057999 | 0.00217657 | 1.17580543 |
| SEC11C    | NM_033280.1 SEC11C    |   | 18 Homo sapiens SPC21; SPCS4    | 4.04E-06   | 6.01E-05   | 1.1753015  |
| PTPN1     | NM_002827.2 PTPN1     |   | 20 Homo sapiens PTP1B           | 1.58E-05   | 0.00015409 | 1.17482259 |
| ANKRD57   | NM_023016.2 ANKRD57   |   | 2 Homo sapiens C2orf26          | 0.00118392 | 0.00376332 | 1.1740701  |
| RGS10     | NM_002925.3 RGS10     |   | 10 Homo sapiens regulator of G- | 0.00013361 | 0.00070796 | 1.17375202 |
| TMEM14B   | NM_030969.2 TMEM14B   |   | 6 Homo sapiens MGC1223          | 0.00017457 | 0.00086828 | 1.17338367 |
| MGC61598  | XM_939432.1 MGC61598  |   | PREDICTED: Homo sapiens s       | 0.00335086 | 0.0084221  | 1.17246327 |
| EDEM2     | NM_018217.1 EDEM2     |   | 20 Homo sapiens FLJ10783; bA    | 0.01054575 | 0.02093356 | 1.17242651 |
| PCYOX1    | NM_016297.2 PCYOX1    |   | 2 Homo sapiens KIAA0908; PC     | 0.00641467 | 0.0140866  | 1.17189988 |
| FAM120B   | NM_032448.1 FAM120B   |   | 6 Homo sapiens KIAA1838; dJ     | 2.00E-05   | 0.00018564 | 1.17189164 |
| ZNF252    | NR_023392.1 ZNF252    |   | 8 Homo sapiens zinc finger pro  | 0.00363052 | 0.00899807 | 1.17159981 |
| C17orf62  | NM_00103304.C17ORF62  |   | 17 Homo sapiens MGC4368; FLJ    | 0.02631085 | 0.04272319 | 1.171572   |
| STK4      | NM_006282.2 STK4      |   | 20 Homo sapiens DKFZp686A20     | 5.13E-06   | 7.04E-05   | 1.1700161  |
| SSTR2     | NM_001050.2 SSTR2     |   | 17 Homo sapiens somatostatin r  | 0.02141025 | 0.03638002 | 1.16982157 |
|           | Hs.413494 HS.413494   |   | 10 Homo sapiens cDNA: FLJ213    | 0.00339375 | 0.00850826 | 1.16927544 |
| PAFAH1B1  | NM_000430.2 PAFAH1B1  |   | 17 Homo sapiens LIS2; PAFAH;    | 9.13E-05   | 0.00054248 | 1.16923503 |
| CLIC4     | XM_938776.1 CLIC4     |   | 1 Homo sapiens p64H1; CLIC4     | 0.00246427 | 0.00664228 | 1.16916346 |
| TRAPPC5   | NM_00104246 TRAPPC5   |   | 19 Homo sapiens MGC52424        | 0.00060601 | 0.00225354 | 1.16872045 |
| DMAP1     | NM_019100.3 DMAP1     |   | 1 Homo sapiens FLJ11543; KIA    | 0.00065693 | 0.00238303 | 1.16832496 |
| UBL5      | NM_00104824 UBL5      |   | 19 Homo sapiens HUB1; MGC13     | 1.30E-05   | 0.00013337 | 1.1681496  |
| CACNB3    | NM_000725.2 CACNB3    |   | 12 Homo sapiens CACNLB3         | 0.00012259 | 0.00066551 | 1.16785581 |
| SOX4      | NM_003107.2 SOX4      |   | 6 Homo sapiens EVI16            | 0.00013356 | 0.00070805 | 1.16751254 |
|           |                       |   | PREDICTED: Homo sapiens n       | 0.01363961 | 0.02558428 | 1.16702302 |
| METRNL    | NM_00100443 METRNL    |   | 9 Homo sapiens surfeit 1 (SUR   | 0.00179687 | 0.0052048  | 1.16639532 |
| SURF1     | NM_003172.2 SURF1     |   | 16 Homo sapiens FLJ40270; TRI   | 0.00766849 | 0.016249   | 1.16628195 |
| PAPD5     | NM_022447.1 PAPD5     |   | 16 Homo sapiens LCMT; PPMT1;    | 0.00012087 | 0.00066077 | 1.16515032 |
| LCMT1     | NM_00103239 LCMT1     |   | 20 Homo sapiens PKCI2; FKBP1.   | 0.00023035 | 0.00106756 | 1.16436533 |
| FKBP1A    | NM_000801.2 FKBP1A    |   | 18 Homo sapiens hIes6; FLJ381   | 0.01557045 | 0.02838303 | 1.16434718 |
| INO80C    | NM_194281.2 INO80C    |   | 1 Homo sapiens SBB148; MGC:     | 0.00179545 | 0.00520345 | 1.1632968  |
| IER5      | NM_016545.3 IER5      |   | 20 Homo sapiens KVEBN1; KV7.    | 0.01420253 | 0.02643937 | 1.16303227 |
| KCNQ2     | NM_004518.2 KCNQ2     |   | 8 Homo sapiens GEF10; DKFZ:     | 0.00017022 | 0.0008494  | 1.16293359 |
| ARHGEF10  | NM_014629.2 ARHGEF10  |   | 1 Homo sapiens HATPL; ATP6F,    | 3.26E-05   | 0.00026487 | 1.1627471  |
| ATP6V0B   | NM_004047.2 ATP6V0B   |   | Homo sapiens MGC131652; I       | 0.00052479 | 0.00200261 | 1.16261813 |
| LOC203547 | NM_00101798 LOC203547 | X | 8 Homo sapiens Car2; CA-II; C   | 7.92E-05   | 0.00049225 | 1.16244299 |
| CA2       | NM_000067.1 CA2       |   | 2 Homo sapiens ICAP1B; ICAP-    | 0.00289306 | 0.00753457 | 1.16220537 |
| ITGB1BP1  | NM_004763.2 ITGB1BP1  |   | 17 Homo sapiens SHAPY; SCAN-    | 0.0001233  | 0.00066866 | 1.16195322 |
| CANT1     | NM_138793.2 CANT1     |   | 6 Homo sapiens bA346C16.3; I    | 0.01207277 | 0.02327601 | 1.16178615 |
| CDC2L6    | NM_015076.3 CDC2L6    |   | 9 PREDICTED: Homo sapiens k     | 0.00061261 | 0.00226997 | 1.16150811 |
| KRT18P13  | XM_00172695 KRT18P13  |   | 11 Homo sapiens FLJ35431; TAI   | 0.00660911 | 0.0144581  | 1.16148959 |
| EHBP1L1   | NM_00109940 EHBP1L1   |   | 17 Homo sapiens GALK; GK1       | 1.66E-05   | 0.00016112 | 1.16117741 |
| GALK1     | NM_000154.1 GALK1     |   | 8 Homo sapiens HSPC112; Vps     | 0.00097826 | 0.00323152 | 1.16102456 |
| LEPROTL1  | NM_015344.1 LEPROTL1  |   | 5 Homo sapiens KIAA0799; MG     | 0.01149604 | 0.02243472 | 1.16089548 |
| MYO10     | NM_012334.1 MYO10     |   | 19 Homo sapiens PROLIDASE; M    | 6.76E-05   | 0.00044177 | 1.16078476 |
| PEPD      | NM_000285.1 PEPD      |   | 7 Homo sapiens DKFZp434K18      | 0.00092542 | 0.00309651 | 1.1606896  |
| LRWD1     | NM_152892.1 LRWD1     |   | 13 Homo sapiens XTP6; MGC22:    | 0.02291433 | 0.03836588 | 1.16038694 |
| DLEU1     | NR_002605.1 DLEU1     |   | 1 Homo sapiens TDE2; PRO08:     | 0.02708069 | 0.04361484 | 1.15978773 |
| SERINC2   | NM_178865.3 SERINC2   |   | 15 Homo sapiens MGC133022; C    | 1.02E-05   | 0.00011258 | 1.15836041 |
| TMED3     | NM_007364.2 TMED3     |   | 19 Homo sapiens LKLF            | 3.98E-06   | 5.98E-05   | 1.1579296  |
| KLF2      | NM_016270.2 KLF2      |   | 20 Homo sapiens RNF114          | 7.16E-05   | 0.00045782 | 1.15786938 |
| RNF114    | NM_018683.3 RNF114    |   | 7 Homo sapiens ZNFN4A1; CG:     | 4.32E-05   | 0.00032439 | 1.15722569 |
| ZNHIT1    | NM_006349.2 ZNHIT1    |   | 17 Homo sapiens stromal cell-d: | 0.00011642 | 0.00064326 | 1.15687778 |
| SDF2      | NM_006923.2 SDF2      |   |                                 |            |            |            |

2.0 Upreg

|           |                       |   |                                 |            |            |            |
|-----------|-----------------------|---|---------------------------------|------------|------------|------------|
| TRAPPC1   | NM_021210.2 TRAPPC1   |   | 17 Homo sapiens BET5; MUM2      | 0.00078285 | 0.00271562 | 1.15625919 |
| F11R      | NM_016946.3 F11R      |   | 1 Homo sapiens JAM; JAM-A; P    | 0.00394776 | 0.00960255 | 1.15624026 |
| IMPA2     | NM_014214.1 IMPA2     |   | 18 Homo sapiens inositol(myo)-  | 0.00450213 | 0.01066227 | 1.15606121 |
| ASNSD1    | NM_019048.1 ASNSD1    |   | 2 Homo sapiens NBIA00058; N     | 3.31E-05   | 0.00026692 | 1.15605968 |
| ASS1      | NM_000050.3 ASS1      |   | 9 Homo sapiens CTLN1; ASS       | 0.00059137 | 0.00220934 | 1.15532695 |
| CLTB      | NM_001834.2 CLTB      |   | 5 Homo sapiens LCB              | 0.00010876 | 0.00061241 | 1.15532235 |
| HES6      | NM_018645.3 HES6      |   | 2 Homo sapiens hairy and enh;   | 4.38E-05   | 0.0003277  | 1.1552902  |
| PIR       | NM_00101810 PIR       | X | Homo sapiens pirin (iron-bin    | 0.00020551 | 0.00098131 | 1.15525392 |
| TMC6      | NM_007267.5 TMC6      |   | 17 Homo sapiens LAK-4P; EVIN1   | 0.0178449  | 0.03149373 | 1.15525368 |
| VAT1      | NM_006373.2 VAT1      |   | 17 Homo sapiens FLJ20230; VA    | 0.0002872  | 0.00125756 | 1.15452485 |
| NDUFA11   | NM_175614.2 NDUFA11   |   | 19 Homo sapiens B14.7           | 9.93E-05   | 0.00057604 | 1.15424893 |
| CHES1     | NM_005197.2 CHES1     |   | 14 Homo sapiens C14orf116; FC   | 0.00690505 | 0.01496392 | 1.15396101 |
| UBE3C     | NM_014671.1 UBE3C     |   | 7 Homo sapiens KIAA10; KIAA     | 0.00013212 | 0.00070318 | 1.15381442 |
| C21orf58  | NM_199071.2 C21ORF58  |   | 21 Homo sapiens chromosome 2    | 0.00767105 | 0.01625126 | 1.15333921 |
| ENDOD1    | XM_943182.1 ENDOD1    |   | 11 Homo sapiens MGC88092; KI    | 0.02188665 | 0.03700437 | 1.15295701 |
|           | Hs.508682 HS.508682   |   | AV762101 MDS Homo sapien        | 1.09E-06   | 2.45E-05   | 1.15283051 |
| MAP2K1IP1 | NM_021970.2 MAP2K1IP1 |   | 4 Homo sapiens MP1              | 0.00234115 | 0.00637204 | 1.15260277 |
| MGST3     | NM_004528.2 MGST3     |   | 1 Homo sapiens GST-III          | 2.78E-06   | 4.64E-05   | 1.15191182 |
| BSG       | NM_001728.2 BSG       |   | 19 Homo sapiens EMMPRIN; OK     | 3.34E-05   | 0.00026866 | 1.15184689 |
| LOC648638 | XM_937706.1 LOC648638 |   | PREDICTED: Homo sapiens s       | 0.00019046 | 0.00092616 | 1.15080676 |
| GABARAPL2 | NM_007285.6 GABARAPL2 |   | 16 Homo sapiens GEF2; GATE16    | 0.0001404  | 0.00073359 | 1.15074478 |
| CD99      | NM_002414.3 CD99      | Y | Homo sapiens MIC2; MIC2Y;       | 0.01167466 | 0.02270989 | 1.15067132 |
| TSPAN5    | NM_005723.2 TSPAN5    |   | 4 Homo sapiens TSPAN-5; TM4     | 0.00147707 | 0.00448903 | 1.15047518 |
| SAP130    | NM_024545.2 SAP130    |   | 2 Homo sapiens FLJ12761         | 0.00206058 | 0.00577325 | 1.15047227 |
| IFI27L2   | NM_032036.2 IFI27L2   |   | 14 Homo sapiens TLH29; MGC4     | 0.00800496 | 0.01678849 | 1.15046296 |
| OGFR      | NM_007346.2 OGFR      |   | 20 Homo sapiens opioid growth   | 0.01353018 | 0.0254185  | 1.15036952 |
| NR4A2     | NM_006186.2 NR4A2     |   | 2 Homo sapiens RNR1; NOT; T.    | 0.00593203 | 0.01324348 | 1.15026153 |
| LOC646723 | NM_199187.1 LOC646723 |   | 5 PREDICTED: Homo sapiens s     | 0.00019153 | 0.00093052 | 1.14996385 |
| ZFPM1     | NM_153813.1 ZFPM1     |   | 16 Homo sapiens FOG1; ZNF40     | 0.00269271 | 0.00712202 | 1.14978702 |
| H1FO      | NM_005318.2 H1FO      |   | 22 Homo sapiens H1FV; MGC52     | 7.59E-06   | 9.25E-05   | 1.14940894 |
| ARHGEF18  | NM_015318.2 ARHGEF18  |   | 19 Homo sapiens KIAA0521; MC    | 0.00030993 | 0.00133398 | 1.14932303 |
| TMEM54    | NM_033504.2 TMEM54    |   | 1 Homo sapiens BCLP; CAC1; I    | 0.00763891 | 0.01619581 | 1.1492294  |
| RHOC      | NM_175744.3 RHOC      |   | 1 Homo sapiens H9; ARHC; MC     | 1.60E-06   | 3.22E-05   | 1.14910157 |
| TUBB6     | XM_940079.1 TUBB6     |   | PREDICTED: Homo sapiens t       | 0.00204776 | 0.00575067 | 1.14903793 |
| CARHSP1   | NM_014316.1 CARHSP1   |   | 16 Homo sapiens CSDC1; MGC1     | 0.00086442 | 0.00293579 | 1.14859302 |
| CCDC24    | NM_152499.1 CCDC24    |   | 1 Homo sapiens RP5-1198O20.     | 0.00112901 | 0.00362699 | 1.14850503 |
| SH3GLB2   | NM_020145.2 SH3GLB2   |   | 9 Homo sapiens PP9455; PP65     | 2.76E-05   | 0.00023522 | 1.14846172 |
| MYH10     | NM_005964.1 MYH10     |   | 17 Homo sapiens NMMHCB; MG      | 4.00E-05   | 0.00030611 | 1.14774645 |
| SMUG1     | NM_014311.1 SMUG1     |   | 12 Homo sapiens UNG3; MGC10     | 0.0001897  | 0.00092367 | 1.14745462 |
| PLEKHA1   | NM_021622.3 PLEKHA1   |   | 10 Homo sapiens TAPP1           | 0.00049999 | 0.00193032 | 1.14734811 |
| HES4      | NM_021170.2 HES4      |   | 1 Homo sapiens hairy and enh;   | 1.53E-05   | 0.00015135 | 1.14589616 |
| TMCO1     | NM_019026.2 TMCO1     |   | 1 Homo sapiens HP10122; TMC     | 1.26E-05   | 0.00013069 | 1.1458854  |
|           | Hs.213541 HS.213541   |   | 12 Homo sapiens cDNA FLJ3208    | 0.00118756 | 0.00377051 | 1.14573561 |
| HERC5     | NM_016323.1 HERC5     |   | 4 Homo sapiens CEBP1; CEB1      | 0.00720913 | 0.01545646 | 1.14560189 |
| PAPSS1    | NM_005443.4 PAPSS1    |   | 4 Homo sapiens SK1; PAPSS; I    | 0.00021238 | 0.00100661 | 1.14480871 |
| PRIC285   | NM_033405.2 PRIC285   |   | 20 Homo sapiens MGC138228; I    | 0.00384298 | 0.0094024  | 1.14460322 |
| SELS      | NM_203472.1 SELS      |   | 15 Homo sapiens SEPS1; ADO1     | 0.00103318 | 0.00338212 | 1.14455615 |
| ITGB1     | NM_002211.2 ITGB1     |   | 10 Homo sapiens GPIIA; VLAB;    | 3.83E-05   | 0.00029716 | 1.14404435 |
| LOC729843 | NM_012477.2 LOC729843 |   | 2 PREDICTED: Homo sapiens s     | 0.00042025 | 0.00169221 | 1.14390962 |
| PAIP2     | NM_00103311 PAIP2     |   | 5 Homo sapiens PAIP2A; MGC7     | 0.00013169 | 0.00070297 | 1.14370951 |
| GMD5      | NM_001500.2 GMD5      |   | 6 Homo sapiens GMD              | 6.66E-05   | 0.00043729 | 1.14369982 |
| CDH13     | NM_001257.3 CDH13     |   | 16 Homo sapiens CDHH            | 0.00851736 | 0.01765866 | 1.14368144 |
| DAD1      | NM_001344.1 DAD1      |   | 14 Homo sapiens OST2            | 1.18E-06   | 2.58E-05   | 1.14350416 |
| PJA2      | NM_014819.2 PJA2      |   | Homo sapiens KIAA0438; RN       | 0.00016341 | 0.00082412 | 1.14326844 |
| PERP      | NM_022121.2 PERP      |   | 6 Homo sapiens THW; RP3-49      | 9.74E-05   | 0.00056896 | 1.14319122 |
| CHMP4B    | NM_176812.3 CHMP4B    |   | 20 Homo sapiens CTPP3; SNF7;    | 0.01872579 | 0.03268217 | 1.14311376 |
| FAM64A    | NM_019013.1 FAM64A    |   | 17 Homo sapiens FLJ10491; FLJ   | 0.00347738 | 0.00869386 | 1.14251783 |
| ACADVL    | NM_000018.2 ACADVL    |   | 17 Homo sapiens ACAD6; VLCAI    | 0.00031256 | 0.00134318 | 1.14215139 |
| TM7SF3    | NM_016551.1 TM7SF3    |   | 12 Homo sapiens transmembrar    | 0.01971189 | 0.03405863 | 1.14151278 |
| ATP6V1B2  | NM_001693.2 ATP6V1B2  |   | 8 Homo sapiens VATB; VPP3; A    | 1.89E-05   | 0.00017773 | 1.14017314 |
| ANKRD9    | NM_152326.2 ANKRD9    |   | 14 Homo sapiens MGC21990        | 0.01557757 | 0.02838649 | 1.13959402 |
| MRPL14    | NM_032111.2 MRPL14    |   | 6 Homo sapiens MGC70566; RI     | 2.22E-05   | 0.00020048 | 1.13957484 |
| ATP6V0E1  | NM_003945.3 ATP6V0E1  |   | 5 Homo sapiens Vma21p; ATP6     | 9.97E-05   | 0.00057752 | 1.13935653 |
| CMTM6     | NM_017801.2 CMTM6     |   | 3 Homo sapiens FLJ20396; CKI    | 0.00067197 | 0.00242141 | 1.13928101 |
| IFI27L1   | NM_145249.2 IFI27L1   |   | 14 Homo sapiens interferon, alp | 0.00378801 | 0.00929932 | 1.13927713 |
| ATP6V0C   | NM_001694.2 ATP6V0C   |   | PREDICTED: Homo sapiens A       | 8.62E-05   | 0.00052124 | 1.13908979 |
| ECGF1     | NM_001953.2 ECGF1     |   | 22 Homo sapiens TP; PDECGF; t   | 0.00073272 | 0.00259049 | 1.13871392 |
| HSD17B4   | NM_000414.1 HSD17B4   |   | 5 Homo sapiens MFE-2            | 0.00070169 | 0.00250608 | 1.13856281 |
| ZMIZ1     | NM_020338.2 ZMIZ1     |   | 10 Homo sapiens MIZ; Zimp10;    | 0.00080148 | 0.00276613 | 1.13825633 |
| LOC387791 | XR_037721.1 LOC387791 |   | PREDICTED: Homo sapiens n       | 0.01357684 | 0.02547972 | 1.13788018 |

## 2.0 Upreg

|             |             |              |                                |            |            |            |
|-------------|-------------|--------------|--------------------------------|------------|------------|------------|
| LOC643336   | XM_00171856 | LOC643336    | PREDICTED: Homo sapiens s      | 0.00229206 | 0.00625881 | 1.13775866 |
| ANXA5       | NM_001154.2 | ANXA5        | 4 Homo sapiens PP4; ANX5; E    | 2.71E-06   | 4.54E-05   | 1.13774364 |
| MSRB2       | NM_012228.2 | MSRB2        | 10 Homo sapiens CBS-1; PILB; I | 0.00227803 | 0.00622833 | 1.13754787 |
| TK1         | NM_003258.1 | TK1          | Homo sapiens TK2               | 4.93E-06   | 6.84E-05   | 1.13723719 |
| ZNF622      | NM_033414.2 | ZNF622       | 5 Homo sapiens MGC17552; ZI    | 0.00247434 | 0.00666116 | 1.13665283 |
| ADIPOR2     | NM_024551.2 | ADIPOR2      | 12 Homo sapiens MGC4640; AC    | 4.99E-05   | 0.0003574  | 1.1366379  |
| SLC2A1      | NM_006516.1 | SLC2A1       | 1 Homo sapiens MGC141895; I    | 4.53E-06   | 6.50E-05   | 1.13620492 |
| EFR3A       | NM_015137.1 | EFR3A        | 8 Homo sapiens KIAA0143; DK    | 0.00028139 | 0.00123709 | 1.13614911 |
| GNS         | NM_002076.2 | GNS          | 12 Homo sapiens G6S; MGC212    | 5.17E-05   | 0.00036503 | 1.13573194 |
| PRKCA       | NM_002737.2 | PRKCA        | 17 Homo sapiens MGC129901; I   | 0.00697776 | 0.01506741 | 1.13512072 |
| C9orf46     | NM_018465.1 | C9ORF46      | 9 Homo sapiens FLJ39176; FLJ   | 0.00625177 | 0.013807   | 1.13488809 |
| LOC399748   | XR_018212.1 | LOC399748    | PREDICTED: Homo sapiens n      | 0.00017973 | 0.00088826 | 1.13475055 |
| WDR41       | NM_018268.2 | WDR41        | 5 Homo sapiens MSTP048; FLJ    | 0.00338902 | 0.00850227 | 1.13470863 |
| PITPNM1     | NM_004910.1 | PITPNM1      | 11 Homo sapiens NIR2; PITPNM   | 0.00073199 | 0.0025896  | 1.13445366 |
| PRDX1       | NM_181696.1 | PRDX1        | 1 Homo sapiens MSP23; PAG; I   | 3.07E-06   | 4.96E-05   | 1.13398854 |
| TMEM160     | NM_015274.1 | TMEM160      | 19 Homo sapiens FLJ20512       | 0.00037799 | 0.00155371 | 1.13367783 |
| GPSM2       | NM_013296.3 | GPSM2        | 1 Homo sapiens Pins; LGN       | 0.00422434 | 0.01009679 | 1.13276568 |
| MRPL40      | NM_003776.2 | MRPL40       | 22 Homo sapiens NLVCF; URIM;   | 0.00374319 | 0.009231   | 1.13275612 |
| NCBP2       | NM_007362.3 | NCBP2        | 3 Homo sapiens PIG55; CBP20    | 0.00012212 | 0.00066424 | 1.13239385 |
| HIBADH      | Hs.57079    | HS.57079     | 10 Homo sapiens cDNA FLJ1326   | 0.00054683 | 0.00206711 | 1.1314287  |
| PQLC1       | NM_152740.2 | HIBADH       | 7 Homo sapiens MGC40361; N     | 0.0001661  | 0.00083493 | 1.13076647 |
| PQLC1       | NM_025078.3 | PQLC1        | 18 Homo sapiens FLJ22378       | 0.00016474 | 0.00083042 | 1.13056664 |
| NT5DC2      | NM_022908.1 | NT5DC2       | 3 Homo sapiens FLJ12442        | 0.00847668 | 0.01758438 | 1.13036029 |
| ASF1B       | NM_018154.2 | ASF1B        | 19 Homo sapiens FLJ10604; CIA  | 0.00070059 | 0.00250297 | 1.13031236 |
| EIF1B       | NM_005875.2 | EIF1B        | 3 Homo sapiens GC20            | 0.00023255 | 0.00107366 | 1.13002701 |
| ECHDC2      | NM_018281.1 | ECHDC2       | 1 Homo sapiens FLJ10948        | 0.00399952 | 0.00968294 | 1.12998996 |
| EIF4E2      | NM_004846.2 | EIF4E2       | 2 Homo sapiens EIF4EL3; 4E-L   | 0.00699808 | 0.01510229 | 1.12969018 |
| TRAPPC3     | NM_014408.3 | TRAPPC3      | 1 Homo sapiens BET3            | 0.0003526  | 0.00147728 | 1.12892447 |
| MAN2B2      | NM_015274.1 | MAN2B2       | 4 Homo sapiens KIAA0935        | 0.00181109 | 0.00523761 | 1.1289174  |
| LOC346887   | XM_943533.1 | LOC346887    | PREDICTED: Homo sapiens s      | 0.00112132 | 0.00360653 | 1.12886999 |
| PIN1        | NM_006221.2 | PIN1         | 19 Homo sapiens UBL5; DOD      | 5.15E-05   | 0.00036428 | 1.12880269 |
| SH3BP4      | NM_014521.1 | SH3BP4       | 2 Homo sapiens BOG25; TTP      | 0.00247955 | 0.00667023 | 1.12844563 |
| CDR2L       | NM_014603.1 | CDR2L        | 17 Homo sapiens HUMPPA         | 0.00027955 | 0.0012325  | 1.12866198 |
| FOS         | NM_005252.2 | FOS          | 14 Homo sapiens c-fos          | 6.20E-05   | 0.00041343 | 1.12732852 |
| CHD7        | NM_017780.2 | CHD7         | 8 Homo sapiens FLJ20361; KIA   | 0.00566734 | 0.01274947 | 1.12721251 |
| SEC13       | NM_00113623 | SEC13        | 3 Homo sapiens SEC13 homolog   | 0.00055598 | 0.00209733 | 1.12714291 |
| PTRF        | NM_012232.2 | PTRF         | 17 Homo sapiens FSG13          | 0.00011371 | 0.00063243 | 1.12671291 |
| CYB5R3      | NM_007326.2 | CYB5R3       | 22 Homo sapiens DIA1; B5R      | 3.85E-05   | 0.00029849 | 1.12669692 |
| FLJ40504    | NM_173624.1 | FLJ40504     | 17 Homo sapiens MGC138233; I   | 7.07E-06   | 8.84E-05   | 1.12597771 |
| UBE2N       | NM_003348.3 | UBE2N        | 12 Homo sapiens MGC8489; MG    | 0.00051203 | 0.00196427 | 1.12597194 |
| SNF8        | NM_007241.2 | SNF8         | 17 Homo sapiens VPS22; EAP30   | 0.00695908 | 0.01503902 | 1.12563073 |
| LOC642489   | XM_925989.1 | LOC642489    | 6 PREDICTED: Homo sapiens s    | 9.63E-05   | 0.0005638  | 1.12545034 |
| APRT        | NM_000485.2 | APRT         | 16 Homo sapiens MGC125857; /   | 0.00023732 | 0.00108691 | 1.12512352 |
| JUP         | NM_021991.1 | JUP          | 17 Homo sapiens PKGB; CTNNG    | 0.00216183 | 0.00597982 | 1.12372822 |
| C20orf111   | NM_016470.6 | C20ORF111    | 20 Homo sapiens dJ1183I21.1;   | 0.00144576 | 0.00441238 | 1.12340506 |
| SGCE        | NM_003919.1 | SGCE         | 7 Homo sapiens DYT11; ESG      | 0.00713921 | 0.01534591 | 1.12327039 |
| GTF2H5      | NM_207118.1 | GTF2H5       | 6 Homo sapiens C6orf175; TTC   | 3.59E-05   | 0.00028384 | 1.12253468 |
| LYRM1       | NM_020424.2 | LYRM1        | 16 Homo sapiens A211C6.1       | 7.83E-05   | 0.00048878 | 1.12211593 |
| LLPH        | NM_032338.3 | LLPH         | 12 Homo sapiens LLP homolog,   | 0.00070456 | 0.00251302 | 1.12120126 |
| GMFB        | NM_004124.2 | GMFB         | 14 Homo sapiens GMF            | 0.00120662 | 0.0038154  | 1.12107194 |
| LOC653506   | XM_927769.1 | LOC653506    | 17 PREDICTED: Homo sapiens s   | 0.00057894 | 0.00217413 | 1.1210077  |
| DHX40       | XM_942276.1 | DHX40        | PREDICTED: Homo sapiens C      | 0.00755029 | 0.01604233 | 1.12097422 |
| LITAF       | NM_004862.2 | LITAF        | 16 Homo sapiens MGC125274; I   | 6.59E-05   | 0.00043444 | 1.12048926 |
| UBR4        | NM_020765.1 | UBR4         | 1 Homo sapiens KIAA1307; FL    | 0.00066607 | 0.0023927  | 1.11968915 |
| LOC10000858 | NR_003286.1 | LOC100008588 | Homo sapiens 18S ribosomal     | 2.02E-05   | 0.00018663 | 1.11881959 |
| COMMD6      | NM_203497.1 | COMMD6       | 13 Homo sapiens Acrg           | 1.90E-05   | 0.00017834 | 1.11850908 |
| SNHG9       | NR_003142.2 | SNHG9        | 16 Homo sapiens DKFZp686N06    | 7.54E-05   | 0.00047552 | 1.11839396 |
| MIF4GD      | NM_020679.2 | MIF4GD       | 17 Homo sapiens SLIP1; MIFD;   | 0.01903971 | 0.03313428 | 1.11829092 |
| ARHGEF3     | NM_019555.1 | ARHGEF3      | 3 Homo sapiens DKFZP434F24     | 0.00310528 | 0.00794263 | 1.11822554 |
| FBXO21      | NM_033624.2 | FBXO21       | 12 Homo sapiens FBX21; MGC2    | 0.01795364 | 0.03165994 | 1.11743389 |
| PPP1CB      | NM_206876.1 | PPP1CB       | 2 Homo sapiens PP-1B; PPP1CI   | 0.02962437 | 0.04666729 | 1.11721081 |
| GNA11       | NM_002067.1 | GNA11        | 19 Homo sapiens GNA-11         | 0.00466184 | 0.0109451  | 1.11719918 |
| TUBB2C      | NM_006088.5 | TUBB2C       | 9 Homo sapiens TUBB2           | 2.99E-05   | 0.0002485  | 1.11668987 |
| TUBB3       | NM_006086.2 | TUBB3        | 16 Homo sapiens TUBB4; MC1R    | 6.57E-05   | 0.0004337  | 1.11614403 |
| SLC4A2      | NM_003040.2 | SLC4A2       | 7 Homo sapiens HKB3; NBND3     | 0.00738003 | 0.0157576  | 1.11559276 |
| SCARB2      | NM_005506.2 | SCARB2       | 4 Homo sapiens CD36L2; HLGf    | 0.00023544 | 0.00108149 | 1.11530422 |
| PCMT1       | NM_005389.1 | PCMT1        | 6 Homo sapiens protein-L-isoa  | 1.19E-05   | 0.0001247  | 1.11493833 |
| EHD1        | NM_006795.2 | EHD1         | 11 Homo sapiens PAST1; PAST;   | 0.01140281 | 0.02227678 | 1.11449859 |
| C7orf50     | NM_032350.3 | C7ORF50      | 7 Homo sapiens MGC11257; Y     | 0.00016901 | 0.00084487 | 1.11419985 |
| LOC10013356 | XM_00172454 | LOC100133565 | PREDICTED: Homo sapiens s      | 0.00024473 | 0.00111286 | 1.11394147 |

2.0 Upreg

|           |                       |   |                                  |            |            |            |
|-----------|-----------------------|---|----------------------------------|------------|------------|------------|
| CENPE     | NM_001813.2 CENPE     |   | 4 Homo sapiens KIF10             | 0.01076426 | 0.02127792 | 1.11380997 |
| ARL2      | NM_001667.1 ARL2      |   | 11 Homo sapiens ARL2             | 0.00094928 | 0.00315788 | 1.11347778 |
| SREBF1    | NM_004176.3 SREBF1    |   | 17 Homo sapiens SREBP1           | 0.00794693 | 0.01669578 | 1.11345568 |
| MRLC2     | NM_033546.2 MRLC2     |   | 18 Homo sapiens MLC-B            | 1.11E-05   | 0.00011961 | 1.1133582  |
| DYNLRB1   | NM_014183.2 DYNLRB1   |   | 20 Homo sapiens BLP; ROBLD1;     | 0.00098733 | 0.00325554 | 1.11275688 |
| LOC648390 | XR_037845.1 LOC648390 |   | 2 PREDICTED: Homo sapiens n      | 0.00029677 | 0.00128753 | 1.11272196 |
| NCOA4     | NM_005437.1 NCOA4     |   | 10 Homo sapiens RFG; ARA70; I    | 0.00017512 | 0.00086982 | 1.11181972 |
| CHMP1A    | NM_002885.1 CHMP1A    |   | 16 Homo sapiens CHMP1A; CHM      | 0.00320844 | 0.00815276 | 1.11127757 |
| GCAT      | NM_014291.2 GCAT      |   | 22 Homo sapiens MGC23053; KI     | 0.00047005 | 0.00183826 | 1.11081643 |
| HSBP1     | NM_001537.2 HSBP1     |   | 16 Homo sapiens DKFZp686D16      | 0.00018834 | 0.00091745 | 1.11009565 |
| LOC644743 | XM_945181.1 LOC644743 |   | 1 PREDICTED: Homo sapiens h      | 3.79E-05   | 0.00029522 | 1.10983916 |
| GLO1      | NM_006708.1 GLO1      |   | 6 Homo sapiens GLYI; GLOD1       | 4.94E-05   | 0.00035468 | 1.10957503 |
| KRT8      | NM_002273.2 KRT8      |   | 12 Homo sapiens CYK8; KO; K8     | 0.0006213  | 0.00228893 | 1.10952443 |
| C21orf24  | NM_00100178 C21ORF24  |   | 21 Homo sapiens chromosome 2     | 0.00096983 | 0.00320854 | 1.10922791 |
| GAMT      | NM_138924.1 GAMT      |   | 19 Homo sapiens TP53I2; PIG2     | 0.00173425 | 0.00507889 | 1.10918851 |
| RAP1GAP   | NM_002885.1 RAP1GAP   |   | 1 Homo sapiens CHA0474; Ra       | 0.01476572 | 0.02722665 | 1.10869231 |
| HMG20B    | NM_006339.1 HMG20B    |   | 19 Homo sapiens SMARCE1r; FL     | 0.00029336 | 0.00127528 | 1.10839944 |
| NBL1      | NM_182744.1 NBL1      |   | 1 Homo sapiens D1S1733E; NC      | 0.00050403 | 0.00194246 | 1.10821403 |
| UBE1      | NM_153280.1 UBE1      | X | Homo sapiens UBA1A; A1S9;        | 0.00205693 | 0.00576746 | 1.10790738 |
| TST       | NM_003312.4 TST       |   | 22 Homo sapiens MGC19578; RI     | 0.00014549 | 0.00075652 | 1.10765819 |
| TALDO1    | XM_938697.1 TALDO1    |   | PREDICTED: Homo sapiens ti       | 9.40E-05   | 0.00055404 | 1.10763626 |
| SOX9      | NM_000346.2 SOX9      |   | 17 Homo sapiens CMPD1; CMD1      | 0.00087936 | 0.00296891 | 1.10715419 |
| RPA3      | NM_002947.3 RPA3      |   | 7 Homo sapiens REPA3             | 0.00027642 | 0.00122168 | 1.105592   |
| CCND1     | NM_053056.1 CCND1     |   | 11 Homo sapiens PRAD1; D11S;     | 5.09E-05   | 0.00036167 | 1.10465962 |
| CHMP5     | NM_016410.2 CHMP5     |   | 9 Homo sapiens C9orf83; SNF7     | 0.00022362 | 0.00104529 | 1.10458323 |
| MGC71993  | NM_00100433 MGC71993  |   | Homo sapiens similar to DNA      | 0.00129577 | 0.00403622 | 1.10404461 |
| FAM104A   | NM_032837.1 FAM104A   |   | 17 Homo sapiens FLJ14775         | 0.00101921 | 0.00334546 | 1.10397839 |
| HEXB      | NM_000521.2 HEXB      |   | 5 Homo sapiens ENC-1AS           | 9.23E-05   | 0.00054659 | 1.10299323 |
| CTNBNB1   | NM_030877.3 CTNBNB1   |   | 20 Homo sapiens C20orf33; NAF    | 0.0061261  | 0.01359299 | 1.10274245 |
| HMGB3     | NM_005342.2 HMGB3     | X | Homo sapiens MGC90319; H         | 0.01437905 | 0.02668116 | 1.10255412 |
| GUSB      | NM_000181.1 GUSB      |   | 7 Homo sapiens MPS7; FLJ394      | 0.01508944 | 0.02767332 | 1.10193542 |
| AP1M1     | NM_032493.2 AP1M1     |   | 19 Homo sapiens MU-1A; CLAP      | 0.00277812 | 0.00730702 | 1.10173593 |
| C17orf61  | NM_152766.2 C17ORF61  |   | 17 Homo sapiens MGC40107         | 5.93E-05   | 0.00040059 | 1.10109429 |
| MAN1B1    | NM_016219.2 MAN1B1    |   | 9 Homo sapiens MANA-ER           | 0.00742117 | 0.01582988 | 1.10107754 |
| RAB26     | NM_014353.4 RAB26     |   | 16 Homo sapiens V46133           | 0.00749892 | 0.01595503 | 1.10041738 |
| CALR      | NM_004343.2 CALR      |   | 19 Homo sapiens FLJ26680; cC1    | 0.00245167 | 0.00661489 | 1.10005082 |
| CAPZA2    | NM_006136.2 CAPZA2    |   | 7 Homo sapiens CAPZ; CAPPA2      | 0.00076054 | 0.00265943 | 1.099826   |
| TOMM20    | NM_014765.2 TOMM20    |   | 1 Homo sapiens translocase of    | 0.00023753 | 0.00108695 | 1.09958195 |
| RNASEK    | NM_00100433 RNASEK    |   | 17 Homo sapiens MGC71993         | 0.0005845  | 0.00218743 | 1.0995481  |
| COX6A1    | NM_004373.2 COX6A1    |   | 12 Homo sapiens COX6AL; COX      | 0.00030921 | 0.00133143 | 1.09952378 |
| PRCP      | NM_005040.2 PRCP      |   | 11 Homo sapiens HUMPCP; PCP;     | 0.00019283 | 0.00093557 | 1.09862052 |
| TBCB      | NM_001281.2 TBCB      |   | 19 Homo sapiens CG22; MGC14      | 0.00128235 | 0.00400478 | 1.09799134 |
| TMEM66    | NM_016127.4 TMEM66    |   | 8 Homo sapiens FLJ22274; FO      | 0.00019392 | 0.00093919 | 1.09673776 |
| BLVRB     | NM_000713.1 BLVRB     |   | Homo sapiens BVRB; MGC11         | 0.02923122 | 0.04623562 | 1.09670248 |
| TMEM59    | NM_004872.3 TMEM59    |   | 1 Homo sapiens FLJ42977; C1      | 0.0013039  | 0.00405457 | 1.09635372 |
| DYNC1H1   | NM_001376.2 DYNC1H1   |   | 14 Homo sapiens DNECL; DNCH      | 0.00088783 | 0.00299285 | 1.0961894  |
| LOC374395 | NM_199337.1 LOC374395 |   | 11 Homo sapiens similar to RIKF  | 0.00020995 | 0.00099858 | 1.09592365 |
| SIVA1     | NM_021709.2 SIVA1     |   | 14 Homo sapiens SIVA; CD27BP     | 0.00011219 | 0.00062689 | 1.09504844 |
| ADRM1     | NM_175573.1 ADRM1     |   | 20 Homo sapiens Rpn13; GP110     | 0.00029802 | 0.00129192 | 1.09503706 |
| APEH      | NM_001640.3 APEH      |   | 3 Homo sapiens D3S48E; APH;      | 0.00058675 | 0.00219434 | 1.0947027  |
| LOC401115 | XM_937968.1 LOC401115 |   | PREDICTED: Homo sapiens h        | 5.13E-05   | 0.00036378 | 1.09447772 |
| AMZ2      | NM_016627.4 AMZ2      |   | 17 Homo sapiens archaealysin fai | 0.00148398 | 0.00450751 | 1.09441215 |
| RING1     | NM_002931.3 RING1     |   | 6 Homo sapiens RNF1              | 4.89E-05   | 0.00035234 | 1.09421485 |
| SERPINE2  | NM_006216.2 SERPINE2  |   | 2 Homo sapiens PI7; GDN; PNI     | 3.88E-05   | 0.00030035 | 1.09400396 |
| COPB2     | NM_004766.1 COPB2     |   | 3 Homo sapiens beta'-COP         | 0.00353049 | 0.0088003  | 1.09392939 |
| LOC643384 | XR_016363.2 LOC643384 |   | 4 PREDICTED: Homo sapiens h      | 0.02380998 | 0.0395668  | 1.0934836  |
| MAD2L2    | NM_006341.2 MAD2L2    |   | 1 Homo sapiens REV7; MAD2B       | 0.00022446 | 0.00104831 | 1.09256864 |
| NOSIP     | NM_015953.3 NOSIP     |   | 19 Homo sapiens CGI-25           | 4.58E-05   | 0.00033804 | 1.09252003 |
| COMMD3    | NM_012071.2 COMMD3    |   | 10 Homo sapiens C10orf8; DKF     | 0.00048356 | 0.00187689 | 1.09243197 |
| GYG1      | NM_004130.2 GYG1      |   | 3 Homo sapiens GYG               | 0.00325087 | 0.00822979 | 1.09207143 |
| MGC40489  | XM_935208.1 MGC40489  |   | 17 PREDICTED: Homo sapiens h     | 0.02277362 | 0.03815968 | 1.09155475 |
| AIF1L     | NM_031426.2 AIF1L     |   | 9 Homo sapiens MGC29466; FL      | 0.00040509 | 0.00164089 | 1.09120209 |
| RPS4Y1    | NM_001008.3 RPS4Y1    | Y | Homo sapiens RPS4Y; MGC1:        | 0.00083748 | 0.00286219 | 1.09106901 |
| UBB       | NM_018955.2 UBB       |   | 17 Homo sapiens FLJ25987; MG     | 0.00205884 | 0.00577135 | 1.0908861  |
| HLA-A     | NM_002116.5 HLA-A     |   | 6 Homo sapiens major histocor    | 3.14E-05   | 0.00025723 | 1.09078742 |
| SDHAF2    | NM_017841.1 SDHAF2    |   | 11 Homo sapiens FLJ20487         | 0.00233223 | 0.00635095 | 1.09069116 |
| RAB10     | NM_016131.2 RAB10     |   | 2 Homo sapiens RAB10, memb       | 0.00035749 | 0.00149201 | 1.09065941 |
| CENPB     | NM_001810.5 CENPB     |   | 20 Homo sapiens centromere pr    | 0.01861233 | 0.03252594 | 1.0906379  |
| ATP5D     | NM_001687.4 ATP5D     |   | 19 Homo sapiens ATP synthase,    | 0.00146677 | 0.00446273 | 1.09061038 |
| CYCSL1    | NR_001561.1 CYCSL1    |   | 6 Homo sapiens HS11; bA513I      | 0.00092306 | 0.00309243 | 1.09029625 |

2.0 Upreg

|           |             |           |                                |            |            |            |
|-----------|-------------|-----------|--------------------------------|------------|------------|------------|
| LOC642934 | XM_931177.1 | LOC642934 | PREDICTED: Homo sapiens h      | 0.02245801 | 0.03775308 | 1.09023253 |
| YTHDF1    | NM_017798.2 | YTHDF1    | 20 Homo sapiens C20orf21; FLJ  | 0.01085332 | 0.0214189  | 1.09022014 |
| SLC35B2   | NM_178148.1 | SLC35B2   | 6 Homo sapiens UGTrel4; SLL;   | 0.00698467 | 0.01507935 | 1.09011636 |
| NDUFB3    | NM_002491.1 | NDUFB3    | 2 Homo sapiens B12             | 6.90E-05   | 0.00044649 | 1.09009229 |
| C1orf41   | NM_016126.1 | C1ORF41   | 1 Homo sapiens HSPCO34; PP2    | 0.02380006 | 0.03955636 | 1.08983202 |
| RHOQ      | NM_012249.2 | RHOQ      | 2 Homo sapiens ARHQ; RASL7;    | 0.01712888 | 0.03052248 | 1.08946984 |
| NXN       | NM_022463.3 | NXN       | 17 Homo sapiens TRG-4; FLJ126  | 0.00455779 | 0.01076126 | 1.08853867 |
| GTF2A2    | NM_004492.1 | GTF2A2    | 15 Homo sapiens TF2A2; HsT18   | 0.00026291 | 0.00117245 | 1.08818099 |
| UNC84B    | NM_015374.1 | UNC84B    | 22 Homo sapiens KIAA0668; MC   | 0.00279365 | 0.00733014 | 1.08746864 |
| POMP      | NM_015932.2 | POMP      | 13 Homo sapiens UMP1; HSPCO.   | 0.00085504 | 0.0029112  | 1.08728415 |
| GPT2      | NM_133443.1 | GPT2      | 16 Homo sapiens ALT2           | 0.01312483 | 0.02482003 | 1.08708639 |
| CALM3     | NM_005184.2 | CALM3     | 19 Homo sapiens FHC; PHKD3     | 8.10E-05   | 0.0004987  | 1.08695011 |
| CAPZB     | NM_004930.2 | CAPZB     | 1 Homo sapiens CAPB; MGC10.    | 0.00750705 | 0.01596919 | 1.08674283 |
| TCEB2     | NM_007108.2 | TCEB2     | 16 Homo sapiens SIII           | 0.00029165 | 0.00126991 | 1.08667259 |
| OCIAD2    | NM_152398.2 | OCIAD2    | 4 Homo sapiens DKFZp686C03     | 0.00094073 | 0.00313326 | 1.08647946 |
| VKORC1    | NM_024006.4 | VKORC1    | 16 Homo sapiens MST134; EDTF   | 0.00049176 | 0.00190533 | 1.08636043 |
| PTP4A2    | XM_944909.1 | PTP4A2    | PREDICTED: Homo sapiens p      | 0.00292787 | 0.00761246 | 1.08620914 |
| LAMP1     | NM_005561.2 | LAMP1     | 13 Homo sapiens LGP120; LAMF   | 0.00016292 | 0.00082238 | 1.08608652 |
| TMEM106C  | NM_024056.2 | TMEM106C  | 12 Homo sapiens MGC5576; MG    | 0.00078934 | 0.00273202 | 1.08535716 |
| KPNA2     | XM_930156.1 | KPNA2     | 17 Homo sapiens RCH1; IPOA1;   | 0.00529516 | 0.01208479 | 1.08491053 |
| PSMD1     | NM_002807.2 | PSMD1     | 2 Homo sapiens S1; MGC1330.    | 0.00180279 | 0.005215   | 1.08377217 |
| COX6C     | NM_004374.2 | COX6C     | 8 Homo sapiens cytochrome c    | 0.00358218 | 0.00890057 | 1.08374247 |
| CDC37     | NM_007065.3 | CDC37     | 19 Homo sapiens P50CDC37       | 0.00021942 | 0.00103052 | 1.08370578 |
| LDLR      | NM_000527.2 | LDLR      | 19 Homo sapiens FHC; FH        | 0.00049851 | 0.00192599 | 1.08301626 |
| FAM46A    | NM_017633.1 | FAM46A    | 6 Homo sapiens XTP11; C6orf3   | 0.00870381 | 0.01796638 | 1.08238008 |
| CCDC130   | NM_030818.2 | CCDC130   | 19 Homo sapiens MGC10471       | 0.00573305 | 0.01287597 | 1.08234288 |
| TXNDC12   | NM_015913.2 | TXNDC12   | 1 Homo sapiens AGR1; ERP19;    | 0.00117456 | 0.00374235 | 1.08222321 |
| FAM83D    | NM_030919.1 | FAM83D    | 20 Homo sapiens C20orf129; FL  | 0.01344445 | 0.02530556 | 1.08213893 |
| LOC644914 | XM_00112855 | LOC644914 | PREDICTED: Homo sapiens s      | 0.00124346 | 0.00390011 | 1.08205161 |
| LMTK3     | XM_936372.1 | LMTK3     | PREDICTED: Homo sapiens k      | 0.00061694 | 0.00227747 | 1.08132563 |
| CISD1     | NM_018464.2 | CISD1     | 10 Homo sapiens C10orf70; MD   | 0.00118102 | 0.00375522 | 1.07986865 |
| ANXA2P1   | NR_001562.1 | ANXA2P1   | 4 Homo sapiens LPC2A; ANX2L    | 0.00056239 | 0.00211783 | 1.07982167 |
| PPP2R2A   | NM_002717.2 | PPP2R2A   | 8 Homo sapiens MGC52248; FL    | 0.01517886 | 0.02779041 | 1.07956765 |
| CFD       | NM_001928.2 | CFD       | 19 Homo sapiens DF; ADN; PFD   | 0.00051581 | 0.00197388 | 1.07837273 |
| C16orf58  | NM_022744.1 | C16ORF58  | 16 Homo sapiens FLJ13868       | 0.01307108 | 0.0247442  | 1.07752048 |
| LOC124512 | XM_940962.1 | LOC124512 | PREDICTED: Homo sapiens h      | 0.00306887 | 0.00787171 | 1.07730712 |
| NDUFA4    | NM_002489.2 | NDUFA4    | 7 Homo sapiens FLJ27440; MG    | 0.00044288 | 0.00175663 | 1.07696064 |
| SF3B14    | NM_016047.3 | SF3B14    | 2 Homo sapiens Ht006; SF3B1.   | 0.00122085 | 0.00384697 | 1.07658743 |
| PDXK      | NM_003681.3 | PDXK      | 21 Homo sapiens PKH; MGC523.   | 0.01636112 | 0.02951737 | 1.07649174 |
| MLEC      | NM_014730.2 | MLEC      | 12 Homo sapiens malectin (MLE  | 0.00336038 | 0.00844407 | 1.07596231 |
| COX4I1    | NM_001861.2 | COX4I1    | 16 Homo sapiens MGC72016; C    | 0.00064223 | 0.00234849 | 1.07557995 |
| TERF2     | NM_005652.2 | TERF2     | 16 Homo sapiens TRBF2; TRF2    | 0.01879481 | 0.03278157 | 1.07530157 |
| SAMM50    | NM_015380.3 | SAMM50    | 22 Homo sapiens OMP85; TOB5.   | 0.00953613 | 0.01933557 | 1.07517915 |
| CCNI      | NM_006835.2 | CCNI      | 4 Homo sapiens CYC1; CYI       | 0.00053246 | 0.00202619 | 1.07515218 |
| TYK2      | NM_003331.3 | TYK2      | 19 Homo sapiens JTK1           | 0.02979995 | 0.04687594 | 1.07431628 |
| NUCB1     | NM_006184.3 | NUCB1     | 19 Homo sapiens DKFZp686A15    | 0.00292836 | 0.00761192 | 1.07317199 |
| CNN3      | NM_001839.2 | CNN3      | 1 Homo sapiens calponin 3, aci | 0.00396392 | 0.00962895 | 1.07301083 |
| MGEA5     | NM_012215.1 | MGEA5     | 10 Homo sapiens MEA5; FLJ233   | 0.00250929 | 0.00672196 | 1.07251388 |
| LOC440926 | NR_002315.1 | LOC440926 | 2 Homo sapiens H3 histone, fa  | 0.00818028 | 0.01710994 | 1.07231477 |
| EDF1      | NM_003792.2 | EDF1      | 9 Homo sapiens EDF-1; MBF1;    | 0.00162643 | 0.00483613 | 1.071926   |
| MRPL33    | NM_004891.2 | MRPL33    | 2 Homo sapiens C2orf1; RPL33   | 0.00067435 | 0.00242836 | 1.07026884 |
| TIPARP    | NM_015508.2 | TIPARP    | 3 Homo sapiens PARP-7; PARP.   | 0.02432945 | 0.04023318 | 1.06904664 |
| RPS23     | NM_001025.4 | RPS23     | 5 Homo sapiens FLJ35016        | 0.01944897 | 0.03371155 | 1.06874925 |
| SLC44A1   | NM_080546.2 | SLC44A1   | 9 Homo sapiens RP11-287A8.1    | 0.02228701 | 0.0375411  | 1.06849487 |
| PSMB1     | NM_002793.2 | PSMB1     | 6 Homo sapiens FLJ25321; KIA   | 0.02137031 | 0.03632352 | 1.06806618 |
| MARCKSL1  | NM_023009.4 | MARCKSL1  | 1 Homo sapiens F52; MACMAR     | 0.00567416 | 0.01276217 | 1.06804815 |
| C19orf22  | NM_138774.2 | C19ORF22  | 19 Homo sapiens MGC16353       | 0.03123889 | 0.04855611 | 1.06797541 |
| LOC729279 | XR_039753.1 | LOC729279 | PREDICTED: Homo sapiens n      | 0.01122415 | 0.021991   | 1.06761798 |
| DENR      | NM_003677.3 | DENR      | 12 Homo sapiens DRP; DRP1; S   | 0.00768925 | 0.01627078 | 1.06743582 |
| TXNDC17   | NM_032731.2 | TXNDC17   | 17 Homo sapiens TRP14; MGC1.   | 0.00038788 | 0.00158418 | 1.06646262 |
| DNAJB6    | NM_005494.2 | DNAJB6    | 7 Homo sapiens DKFZp566D08     | 0.02081365 | 0.03557207 | 1.06564079 |
| PRDX4     | NM_006406.1 | PRDX4     | Homo sapiens PRX-4; AOE37      | 0.00797177 | 0.01673178 | 1.06449293 |
| DCXR      | NM_016286.2 | DCXR      | 17 Homo sapiens P34H; HCRII;   | 0.00587733 | 0.01314568 | 1.06420788 |
| LOC730288 | XM_00112627 | LOC730288 | 7 PREDICTED: Homo sapiens s    | 0.00405702 | 0.00978076 | 1.06351234 |
| LTA4H     | NM_000895.1 | LTA4H     | 12 Homo sapiens leukotriene A4 | 0.01050981 | 0.02088129 | 1.06265    |
| SNX3      | NM_152828.2 | SNX3      | 6 Homo sapiens SLP3; MGC17     | 0.00209188 | 0.00583088 | 1.06221951 |
| RPL11     | NM_000975.2 | RPL11     | 1 Homo sapiens GIG34           | 0.00293562 | 0.00762348 | 1.06138031 |
| ACTN4     | NM_004924.3 | ACTN4     | 19 Homo sapiens DKFZp686K23    | 0.02093285 | 0.03573084 | 1.06096883 |
| RAC1      | NM_198829.1 | RAC1      | 7 Homo sapiens MGC111543; I    | 0.01089363 | 0.02147896 | 1.06010718 |
| FLJ35390  | NR_024416.1 | FLJ35390  | 7 Homo sapiens hypothetical L  | 0.0283122  | 0.04515659 | 1.06006962 |

## 2.0 Upreg

|            |             |            |    |                              |            |            |            |
|------------|-------------|------------|----|------------------------------|------------|------------|------------|
| GLG1       | NM_012201.4 | GLG1       | 16 | Homo sapiens CFR-1; FLJ233   | 0.00245079 | 0.00661414 | 1.05999532 |
| JUND       | NM_005354.2 | JUND       | 19 | Homo sapiens jun D proto-or  | 0.00359468 | 0.00892347 | 1.05944043 |
| CAP1       | NM_006367.2 | CAP1       | 1  | Homo sapiens CAP1-PEN; CA    | 0.00125019 | 0.0039167  | 1.05880848 |
| TMBIM6     | NM_003217.1 | TMBIM6     | 12 | Homo sapiens BI-1; TMBIM6    | 0.00122504 | 0.00385346 | 1.05823603 |
| LOC646942  | XR_016892.2 | LOC646942  | 7  | PREDICTED: Homo sapiens n    | 0.02292538 | 0.03837257 | 1.05814482 |
| SLC20A1    | NM_005415.3 | SLC20A1    | 2  | Homo sapiens Glvr-1; PIT-1;  | 0.00728235 | 0.01557657 | 1.05766527 |
| RPS10      | NM_001014.3 | RPS10      | 6  | Homo sapiens MGC88819        | 0.01444315 | 0.02677723 | 1.05744572 |
| ANXA2      | NM_00100285 | ANXA2      | 15 | Homo sapiens P36; LPC2D; /   | 0.00051156 | 0.00196314 | 1.05704989 |
| NDUFA12    | NM_018838.3 | NDUFA12    | 12 | Homo sapiens DAP13; B17.2    | 0.00707296 | 0.01522761 | 1.05653109 |
| CST3       | NM_000099.2 | CST3       | 20 | Homo sapiens MGC117328       | 0.00797013 | 0.01673157 | 1.05468991 |
| PTPLAD1    | XM_941966.1 | PTPLAD1    | 15 | Homo sapiens B-IND1; HSPC    | 0.01146235 | 0.02238505 | 1.05418763 |
| C20orf43   | NM_016407.1 | C20ORF43   | 20 | Homo sapiens HSPC164; SHL    | 0.00647841 | 0.01420935 | 1.05399831 |
| EMD        | NM_000117.1 | EMD        |    | Homo sapiens STA; EDMD       | 0.01682393 | 0.03015213 | 1.05395856 |
| MAPRE1     | NM_012325.1 | MAPRE1     | 20 | Homo sapiens EB1; MGC129     | 0.01207469 | 0.02327558 | 1.05308134 |
| KIAA0174   | NM_014761.2 | KIAA0174   | 16 | Homo sapiens MGC117220       | 0.01220353 | 0.02346982 | 1.05172262 |
| UBA1       | NM_003334.3 | UBA1       |    | Homo sapiens UBA1A; A1S9;    | 0.00846559 | 0.01757816 | 1.05167964 |
| CDKN2AIPNL | NM_080656.1 | CDKN2AIPNL | 5  | Homo sapiens MGC13017        | 0.00165632 | 0.00489419 | 1.05089434 |
| LOC730740  | XM_930111.1 | LOC730740  |    | PREDICTED: Homo sapiens s    | 0.00560856 | 0.01265128 | 1.04984224 |
| LY6E       | NM_002346.1 | LY6E       | 8  | Homo sapiens TSA-1; RIGE;    | 0.01722213 | 0.0306334  | 1.04889312 |
| PPP6C      | NM_002721.3 | PPP6C      | 9  | Homo sapiens protein phosph  | 0.0250094  | 0.04108256 | 1.04839667 |
| SHFM1      | NM_006304.1 | SHFM1      | 7  | Homo sapiens SHSF1; DSS1;    | 0.00856116 | 0.0177258  | 1.04815334 |
| RHOA       | NM_001664.2 | RHOA       | 3  | Homo sapiens RHO12; RHOH     | 0.00732811 | 0.01566521 | 1.04560153 |
| SDF2L1     | NM_022044.2 | SDF2L1     | 22 | Homo sapiens stromal cell-de | 0.01955479 | 0.03386797 | 1.04554829 |
| RAC2       | NM_002872.3 | RAC2       | 22 | Homo sapiens Gx; EN-7; HSF   | 0.02337614 | 0.03896501 | 1.04386127 |
| CDK5RAP3   | NM_176096.1 | CDK5RAP3   | 17 | Homo sapiens MST016; LZAF    | 0.03137469 | 0.04868363 | 1.04329345 |
| DSTN       | NM_006870.3 | DSTN       | 20 | Homo sapiens ACTDP; bA462    | 0.0295414  | 0.04659738 | 1.04265939 |
| FAT1       | NM_005245.3 | FAT1       | 4  | Homo sapiens ME5; hFat1; C   | 0.00934072 | 0.01901742 | 1.04105619 |
| FSCN1      | NM_003088.2 | FSCN1      | 7  | Homo sapiens FLJ38511; SNI   | 0.02978239 | 0.04686188 | 1.04020723 |

## 5.0 Upreg

| SYMBOL      | SEARCH_KEY  | ILMN_GENE    | CHROMOSOME | DEFINITION                  | SYNONYMS | pval       | fdr        | fold       |
|-------------|-------------|--------------|------------|-----------------------------|----------|------------|------------|------------|
| PKD1        | NM_00100994 | PKD1         | 16         | Homo sapiens PBP            |          | 0.00572608 | 0.00714255 | 2070.63461 |
| SLC6A17     | NM_00101089 | SLC6A17      | 1          | Homo sapiens NTT4           |          | 0.01889508 | 0.01961958 | 539.914666 |
| TFPT        | NM_013342.1 | TFPT         | 19         | Homo sapiens FB1; amida     |          | 0.00816312 | 0.00965663 | 206.548416 |
|             | Hs.578356   | HS.578356    | 14         | 602135270F1 NIH_MGC_81      |          | 0.03070181 | 0.02953055 | 182.272487 |
|             | Hs.579070   | HS.579070    | 17         | DA481142 ERLTF1 Homo sap    |          | 0.02354257 | 0.02373736 | 110.482964 |
| SNORA3      | NR_002580.1 | SNORA3       | 11         | Homo sapiens ACA3           |          | 0.0140754  | 0.01527679 | 107.323154 |
| TBC1D17     | NM_024682.1 | TBC1D17      | 19         | Homo sapiens FLJ12168       |          | 0.03491822 | 0.03286553 | 74.9703446 |
|             | Hs.545780   | HS.545780    | 9          | zu71d08.s1 Soares_testis_NI |          | 5.562E-05  | 0.00014874 | 71.0740275 |
| LOC649864   | XM_941341.1 | LOC649864    |            | PREDICTED: Homo sapiens s   |          | 0.00315162 | 0.00426601 | 48.0965134 |
| LOC647288   | XR_038777.1 | LOC647288    |            | PREDICTED: Homo sapiens n   |          | 0.05105879 | 0.0451057  | 46.7779845 |
| LOC647363   | XM_942814.1 | LOC647363    |            | PREDICTED: Homo sapiens h   |          | 0.01540184 | 0.01655001 | 43.8504206 |
| LOC388955   | NR_003131.1 | LOC388955    | 2          | Homo sapiens PX19 protein p |          | 0.01426772 | 0.01546831 | 40.367799  |
| ICOSLG      | NM_015259.4 | ICOSLG       | 21         | Homo sapiens ICOSL; B7RP1   |          | 0.01436674 | 0.01555068 | 39.6512769 |
| SLC9A6      | NM_006359.1 | SLC9A6       | X          | Homo sapiens KIAA0267; NH   |          | 0.00021053 | 0.00043782 | 35.3033191 |
|             | Hs.571376   | HS.571376    | 7          | 602538817F1 NIH_MGC_59      |          | 0.03375145 | 0.03193521 | 30.0202541 |
| LOC727963   | XR_015173.2 | LOC727963    | 15         | PREDICTED: Homo sapiens s   |          | 0.01153397 | 0.01294437 | 25.3742771 |
| GPATCH8     | NM_00100290 | GPATCH8      | 17         | Homo sapiens GPATCH8; KIAA  |          | 0.01472505 | 0.01587779 | 24.5188503 |
| LOC10013409 | XM_00172105 | LOC100134098 |            | PREDICTED: Homo sapiens s   |          | 0.00535582 | 0.00674009 | 23.6376268 |
| C2orf18     | NM_017877.2 | C2ORF18      | 2          | Homo sapiens FLJ20555       |          | 0.01435741 | 0.01554442 | 21.6635072 |
|             | Hs.580813   | HS.580813    | 20         | DB075090 TEST14 Homo sap    |          | 0.0266306  | 0.02630975 | 20.7678518 |
|             | Hs.540658   | HS.540658    | 16         | Homo sapiens mRNA; cDNA l   |          | 0.0215649  | 0.02199865 | 19.1764818 |
| MIR1253     | NR_031654.1 | MIR1253      |            | Homo sapiens microRNA 125   |          | 0.02972954 | 0.02879105 | 18.522036  |
|             | Hs.137598   | HS.137598    | 9          | qe03b09.x1 Soares_testis_N  |          | 0.03015995 | 0.02914675 | 18.2185916 |
|             | Hs.529962   | HS.529962    | 6          | EST389173 MAGE resequenc    |          | 0.03642624 | 0.03407291 | 16.2303945 |
| SNORD100    | NR_002435.1 | SNORD100     | 6          | Homo sapiens HBII-429       |          | 0.04573991 | 0.04123736 | 16.0777375 |
| LOC649571   | XM_938642.1 | LOC649571    |            | PREDICTED: Homo sapiens s   |          | 0.00234601 | 0.00331998 | 15.2634442 |
| HERPUD2     | NM_022373.3 | HERPUD2      | 7          | Homo sapiens FLJ22313       |          | 0.04185702 | 0.03825557 | 14.7798438 |
| TRADD       | NM_003789.2 | TRADD        | 16         | Homo sapiens MGC11078; H    |          | 0.01997281 | 0.02058758 | 14.5443689 |
| LOC643995   | XM_934412.1 | LOC643995    | 17         | PREDICTED: Homo sapiens s   |          | 0.03114175 | 0.02987838 | 14.113115  |
|             | Hs.581028   | HS.581028    | 22         | DA778026 OCBF2 Homo sa      |          | 0.01329081 | 0.01457306 | 13.8583804 |
| SNORD21     | NR_000006.8 | SNORD21      | 1          | Homo sapiens U21; RNU21     |          | 0.00176497 | 0.00260529 | 13.8028712 |
| HELQ        | NM_133636.1 | HELQ         | 4          | Homo sapiens MGC20604       |          | 0.01391068 | 0.0151317  | 13.5312231 |
|             | 39334       | NM_144710.2  | 39334      | 2 Homo sapiens FLJ11619     |          | 0.00884333 | 0.01034552 | 13.5024655 |
|             | Hs.540229   | HS.540229    | 15         | oy61c12.s1 NCI_CGAP_Brn2    |          | 0.02288124 | 0.02316105 | 13.3824892 |
| IRF5        | NM_002200.3 | IRF5         | 7          | Homo sapiens interferon reg |          | 0.05132745 | 0.04528832 | 13.2069999 |
| CASP7       | NM_033338.4 | CASP7        | 10         | Homo sapiens ICE-LAP3; CAS  |          | 0.00711018 | 0.00857639 | 12.2878893 |
| LOC10012924 | XM_00171934 | LOC100129243 |            | PREDICTED: Homo sapiens s   |          | 0.05012536 | 0.04440181 | 12.1144362 |
| NCRNA00087  | NR_024493.1 | NCRNA00087   | X          | Homo sapiens non-protein cc |          | 0.04877685 | 0.04346178 | 11.8578577 |
| LOC644322   | XM_933391.1 | LOC644322    | 9          | PREDICTED: Homo sapiens s   |          | 0.00977568 | 0.01125615 | 11.2546727 |
| LOC730012   | NM_153832.1 | LOC730012    | 1          | PREDICTED: Homo sapiens s   |          | 0.00389283 | 0.00512617 | 11.0719156 |
|             | Hs.134848   | HS.134848    | 14         | BX103634 Soares_NSF_F8_9    |          | 0.01237429 | 0.01371898 | 11.0438767 |
| LOC641825   | XM_935575.1 | LOC641825    |            | PREDICTED: Homo sapiens h   |          | 0.0009029  | 0.00147304 | 10.9715461 |
|             | Hs.544632   | HS.544632    | 6          | oa80h04.s1 NCI_CGAP_GCB     |          | 0.0163013  | 0.01732198 | 10.8372286 |
| RLTPR       | NM_00101383 | RLTPR        | 16         | Homo sapiens LRRC16C        |          | 0.03057934 | 0.02944503 | 10.7077921 |
| LOC644760   | XM_932354.1 | LOC644760    | 5          | PREDICTED: Homo sapiens h   |          | 0.03814796 | 0.03543407 | 10.6790649 |
| GULP1       | NM_016315.2 | GULP1        | 2          | Homo sapiens CED-6; FLJ31   |          | 0.00019421 | 0.00041069 | 10.6484087 |
| POPDC3      | NM_022361.3 | POPDC3       | 6          | Homo sapiens MGC22671; b/   |          | 0.00016339 | 0.00035662 | 10.4427051 |
| C3orf62     | NM_198562.1 | C3ORF62      | 3          | Homo sapiens FLJ43654; MG   |          | 0.03310898 | 0.03140861 | 10.2215487 |
| ELK3        | NM_005230.2 | ELK3         | 12         | Homo sapiens SAP2; NET; EF  |          | 0.0041305  | 0.00539944 | 9.85887195 |
|             | Hs.566420   | HS.566420    | 5          | UI-H-BW1-aoa-a-06-0-UI.s1   |          | 0.04983014 | 0.04419831 | 9.50570238 |
|             | Hs.128463   | HS.128463    | 6          | BX102609 NCI_CGAP_Lu5 H     |          | 0.00865537 | 0.01015541 | 9.46984705 |
|             | Hs.444550   | HS.444550    | 20         | ql44b06.x1 NCI_CGAP_Co8     |          | 0.01454831 | 0.01571039 | 9.30438255 |
|             | Hs.569175   | HS.569175    | 12         | DA697821 NT2NE2 Homo sa     |          | 0.00149225 | 0.00225858 | 9.19478217 |
| LOC10013468 | XR_036950.1 | LOC10013468  | 7          | PREDICTED: Homo sapiens n   |          | 0.02487528 | 0.02487528 | 9.00573928 |
| NAGS        | NM_153006.2 | NAGS         | 17         | Homo sapiens ARG4; MGC13    |          | 0.00960302 | 0.01109081 | 8.88473812 |
|             | Hs.486010   | HS.486010    |            | Homo sapiens mRNA; cDNA l   |          | 0.00987628 | 0.01135559 | 8.75066698 |
|             | Hs.403584   | HS.403584    | 3          | UI-H-FE1-bei-a-08-0-UI.s2   | N        | 0.03963943 | 0.03657549 | 8.31174432 |
| LOC10013398 | XM_00171761 | LOC100133981 |            | PREDICTED: Homo sapiens h   |          | 0.00660411 | 0.00805792 | 8.15412379 |
| C2orf48     | NM_182626.1 | C2ORF48      | 2          | Homo sapiens FLJ25102       |          | 0.0287633  | 0.02798505 | 8.0209665  |
| LOC10013017 | XR_039527.1 | LOC100130179 |            | PREDICTED: Homo sapiens n   |          | 0.00694761 | 0.00840573 | 7.73433636 |
| PLEKHA9     | NM_015899.1 | PLEKHA9      | 12         | Homo sapiens FLJ14156       |          | 0.03103378 | 0.02980086 | 7.61163004 |
| RNF122      | NM_024787.2 | RNF122       | 8          | Homo sapiens MGC126622; l   |          | 0.00300664 | 0.0040925  | 7.50353611 |
|             | Hs.521794   | HS.521794    | 8          | ha32c07.x1 NCI_CGAP_Kid1    |          | 0.00599605 | 0.0074307  | 7.49092887 |
| CASP9       | NM_001229.2 | CASP9        | 1          | Homo sapiens ICE-LAP6; MC   |          | 0.02340794 | 0.02362877 | 7.43365309 |
| SNORD88B    | NR_003068.1 | SNORD88B     | 19         | Homo sapiens HBII-180B      |          | 0.02286726 | 0.02314958 | 7.29362247 |
| GRIN2C      | NM_000835.3 | GRIN2C       | 17         | Homo sapiens NR2C; NMDAR    |          | 0.00415172 | 0.00541749 | 7.21344598 |
| LOC10012934 | XM_00171873 | LOC10012934  | 1          | PREDICTED: Homo sapiens h   |          | 0.01344061 | 0.01471157 | 7.10843191 |
| LOC644075   | XM_930109.1 | LOC644075    | 1          | PREDICTED: Homo sapiens h   |          | 0.03360003 | 0.03180566 | 7.05711843 |
| KIAA0889    | NM_152257.1 | KIAA0889     | 20         | Homo sapiens dJ469A13.6.1   |          | 0.00153014 | 0.00230479 | 6.89188188 |

## 5.0 Upreg

|             |             |             |    |                               |            |            |            |
|-------------|-------------|-------------|----|-------------------------------|------------|------------|------------|
| LOC730027   | XM_496044.2 | LOC730027   | 15 | PREDICTED: Homo sapiens s     | 0.01527846 | 0.01639193 | 6.76706003 |
| LOC643888   | XM_943421.1 | LOC643888   | X  | PREDICTED: Homo sapiens h     | 0.02524625 | 0.02517452 | 6.74533017 |
| LOC10013412 | XM_00172152 | LOC10013412 |    | PREDICTED: Homo sapiens h     | 0.00199059 | 0.00288256 | 6.68875088 |
|             | Hs.131259   | HS.131259   | 2  | BX111229 Soares_NFL_T_GE      | 0.01594685 | 0.01699061 | 6.68586712 |
| LOC644641   | XM_929614.1 | LOC644641   | 11 | PREDICTED: Homo sapiens h     | 0.01779918 | 0.01865385 | 6.66890391 |
| GLYCTK      | NM_145262.2 | GLYCTK      | 3  | Homo sapiens HBeAgBP4A; f     | 0.0003203  | 0.00062051 | 6.65586762 |
| CNTROB      | NM_053051.1 | CNTROB      | 17 | Homo sapiens PP1221; LIP8     | 0.00393319 | 0.0051731  | 6.61974048 |
| ERLIN2      | NM_00100379 | ERLIN2      | 8  | Homo sapiens C8orf2; MGC8     | 0.00078551 | 0.00131203 | 6.5178497  |
|             | Hs.146561   | HS.146561   | 7  | BX106374 Soares_fetal_hear    | 0.01164422 | 0.01304806 | 6.5121135  |
|             | Hs.42612    | HS.42612    | 2  | AGENCOURT_7782569 NIH_I       | 0.00651921 | 0.00797874 | 6.40162671 |
|             | Hs.573047   | HS.573047   | 4  | BX110921 Soares_fetal liver : | 0.00086067 | 0.00141468 | 6.38244255 |
| SNORD46     | NR_000024.1 | SNORD46     | 1  | Homo sapiens U46; RNU40; l    | 0.00714703 | 0.00861493 | 6.36334855 |
|             | Hs.151334   | HS.151334   | 9  | im52e03.y1 HR85 islet Homc    | 0.00840618 | 0.0099041  | 6.22978488 |
|             | Hs.436323   | HS.436323   | 9  | UI-CF-FNO-af-r-k-06-0-UI.s1 l | 0.02230449 | 0.02264255 | 6.17677691 |
| LOC152024   | XM_944430.1 | LOC152024   |    | PREDICTED: Homo sapiens n     | 0.00230768 | 0.00327578 | 6.09015557 |
| AACS        | NM_023928.2 | AACS        | 12 | Homo sapiens FLJ41251; SU     | 0.01261751 | 0.01394634 | 6.08230614 |
|             | Hs.545519   | HS.545519   | 8  | UI-H-FG0-bcu-e-06-0-UI.s1 l   | 0.00034167 | 0.00065555 | 5.96754648 |
| WTIP        | XM_059037.7 | WTIP        | 19 | PREDICTED: Homo sapiens V     | 0.02332932 | 0.02356025 | 5.88115184 |
| LOC392145   | XM_373214.1 | LOC392145   | 7  | PREDICTED: Homo sapiens s     | 0.03058741 | 0.02944957 | 5.73939217 |
| MYADML      | NM_207329.1 | MYADML      | 2  | Homo sapiens myeloid-assoc    | 0.0053721  | 0.00675865 | 5.61305872 |
|             | Hs.569596   | HS.569596   |    | K-EST0070164 S225NU16 Hc      | 0.02377138 | 0.02392956 | 5.59130189 |
| PPP1R14A    | NM_033256.1 | PPP1R14A    | 19 | Homo sapiens CPI-17; CPI17    | 0.02448044 | 0.02456724 | 5.56206309 |
| FDXR        | NM_024417.1 | FDXR        | 17 | Homo sapiens ADXR             | 0.00461939 | 0.00592638 | 5.52059781 |
| LOC643772   | XM_927061.1 | LOC643772   | 9  | PREDICTED: Homo sapiens s     | 0.00026571 | 0.00053117 | 5.45748224 |
| HOXA2       | NM_006735.3 | HOXA2       | 7  | Homo sapiens HOX1K            | 0.00058964 | 0.00103285 | 5.39389326 |
|             | Hs.538367   | HS.538367   | 10 | nv82g01.s1 NCI_CGAP_Br4 f     | 0.05687727 | 0.0494247  | 5.3862541  |
| TGFBRAP1    | NM_004257.3 | TGFBRAP1    | 2  | Homo sapiens TRAP-1; TRAP     | 0.00513212 | 0.0064921  | 5.18727762 |
| LOC10013381 | XM_00171875 | LOC10013381 |    | PREDICTED: Homo sapiens s     | 0.00025131 | 0.00050771 | 5.15667577 |
|             | Hs.569304   | HS.569304   | 13 | DA193949 BRAMY3 Homo sa       | 0.00179165 | 0.00263978 | 5.12486296 |
|             | Hs.544487   | HS.544487   | 6  | naa41b05.x1 NCI_CGAP_Kid      | 0.05747237 | 0.04981847 | 5.08682667 |
|             | Hs.554608   | HS.554608   | 17 | HSCQD082 normalized infar     | 0.02999034 | 0.02899242 | 5.06755413 |
| LRRC40      | NM_017768.3 | LRRC40      | 1  | Homo sapiens FLJ20331; RP4    | 0.00183511 | 0.00269207 | 5.04295728 |
|             | Hs.258266   | HS.258266   | 16 | K-EST0220612 L18POOL1n1       | 0.03489487 | 0.0328506  | 5.03983175 |
|             | Hs.541438   | HS.541438   | 2  | DKFZp434K0419_r1 434 (sy)     | 0.00597212 | 0.00740523 | 5.02233885 |
|             | Hs.573575   | HS.573575   | X  | AU310952 human 4S neurob      | 0.05241723 | 0.04607843 | 5.00483058 |
| LOC10013322 | XM_00172456 | LOC10013322 |    | PREDICTED: Homo sapiens s     | 0.00375115 | 0.00495895 | 4.96822213 |
| MIR635      | NR_030365.1 | MIR635      |    | Homo sapiens microRNA 635     | 0.02112979 | 0.02160755 | 4.9509712  |
| SNORA14B    | NR_002956.1 | SNORA14B    | 1  | Homo sapiens ACA14b           | 0.0058528  | 0.00727579 | 4.93727989 |
| NPNT        | NM_00103304 | NPNT        | 4  | Homo sapiens EGFL6L; POEM     | 0.03275811 | 0.03114985 | 4.90595452 |
|             | Hs.555181   | HS.555181   | 2  | AGENCOURT_6411402 NIH_I       | 0.0031211  | 0.004226   | 4.86773964 |
|             | Hs.558271   | HS.558271   | 6  | H.sapiens mRNA for CD58 T3    | 0.00628991 | 0.00774564 | 4.8668187  |
| SNORA59B    | NR_003022.1 | SNORA59B    | 17 | Homo sapiens ACA59            | 0.0004671  | 0.00084923 | 4.84675189 |
|             | Hs.569298   | HS.569298   | 13 | ov70a09.s1 Soares_testis_NI   | 0.00605941 | 0.00750074 | 4.83995775 |
|             | Hs.125056   | HS.125056   | 1  | Homo sapiens cDNA FLJ3666     | 0.04596906 | 0.04138866 | 4.80894431 |
| C17orf37    | NM_032339.3 | C17ORF37    | 17 | Homo sapiens RD1X2; MGC1      | 0.00863936 | 0.0101407  | 4.78065743 |
|             | Hs.190092   | HS.190092   | 1  | BX116001 Soares_testis_NH     | 0.02677299 | 0.02642365 | 4.77676938 |
| PLCH1       | NM_014996.1 | PLCH1       | 3  | Homo sapiens DKFZp434C13      | 0.0128342  | 0.01414308 | 4.73845491 |
| GNAQ        | NM_002072.2 | GNAQ        | 9  | Homo sapiens GAQ; G-ALPHA     | 0.00319792 | 0.0043167  | 4.73154763 |
| LOC642954   | XM_927104.1 | LOC642954   | 5  | PREDICTED: Homo sapiens h     | 0.03101551 | 0.02978983 | 4.63307752 |
|             | Hs.540741   | HS.540741   | 17 | op63a09.s1 Soares_NFL_T_C     | 0.04653211 | 0.04180552 | 4.60492934 |
| C17orf56    | NM_144679.1 | C17ORF56    | 17 | Homo sapiens FLJ31528         | 0.04214397 | 0.03847775 | 4.58487639 |
|             | Hs.563805   | HS.563805   | 1  | UI-H-BI3-akn-d-04-0-UI.s1 N   | 0.00335929 | 0.00450748 | 4.57477065 |
| SEMA3A      | NM_006080.1 | SEMA3A      | 7  | Homo sapiens SEMAIII; SEM.    | 0.00069885 | 0.00118625 | 4.53040188 |
| DHODH       | NM_001361.3 | DHODH       | 16 | Homo sapiens DHOdehase        | 0.00016665 | 0.00036202 | 4.52139122 |
| PRG2        | NM_002728.4 | PRG2        | 11 | Homo sapiens MGC14537; M      | 0.01906587 | 0.01977819 | 4.44975882 |
| LOC390561   | XM_931039.1 | LOC390561   | 15 | PREDICTED: Homo sapiens s     | 0.05621057 | 0.04893258 | 4.39754066 |
|             | Hs.149244   | HS.149244   | 17 | DB336496 TESTI2 Homo sap      | 0.00808274 | 0.00957057 | 4.32907396 |
| LMX1B       | NM_002316.1 | LMX1B       | 9  | Homo sapiens LMX1.2; MGC1     | 0.00161994 | 0.0024193  | 4.29836542 |
| LOC652185   | XM_941547.1 | LOC652185   |    | PREDICTED: Homo sapiens s     | 0.00689587 | 0.00835119 | 4.27924281 |
|             | Hs.563438   | HS.563438   | 7  | UI-H-EIO-ayi-c-19-0-UI.s1 N   | 0.05280997 | 0.04636329 | 4.27702064 |
|             | Hs.545507   | HS.545507   |    | wt60c01.x1 NCI_CGAP_Pan1      | 0.04887148 | 0.04352399 | 4.27420133 |
| VN1R5       | NM_173858.1 | VN1R5       | 1  | Homo sapiens V1RL5            | 0.01578863 | 0.01684248 | 4.26166617 |
| LOC643339   | XM_931493.1 | LOC643339   | 12 | PREDICTED: Homo sapiens h     | 0.02706444 | 0.02664834 | 4.23772931 |
| LOC285484   | XM_938853.1 | LOC285484   |    | PREDICTED: Homo sapiens h     | 0.00157219 | 0.00235761 | 4.12272798 |
|             | Hs.539990   | HS.539990   | 14 | yy43f04.s1 Soares melanocy    | 0.00320237 | 0.00432137 | 4.09984945 |
|             | Hs.47702    | HS.47702    | 5  | BX111257 Soares_fetal liver : | 0.01590552 | 0.01595275 | 4.07399032 |
| LOC10013055 | XM_00172134 | LOC10013055 |    | PREDICTED: Homo sapiens s     | 0.02040547 | 0.02097195 | 4.06982318 |
| LOC10012958 | XM_00171608 | LOC10012958 |    | PREDICTED: Homo sapiens h     | 0.01317771 | 0.01446712 | 4.06065239 |
|             | Hs.349049   | HS.349049   | 15 | 603630012F1 NIH_MGC_41 l      | 0.01062286 | 0.012081   | 4.05283957 |
|             | Hs.130455   | HS.130455   | 7  | BX118075 Soares_NFL_T_GE      | 0.05609214 | 0.04884403 | 4.01280069 |



### 5.0 Upreg

|             |             |              |                                 |            |            |            |
|-------------|-------------|--------------|---------------------------------|------------|------------|------------|
| LOC402562   | XM_939955.1 | LOC402562    | PREDICTED: Homo sapiens s       | 0.02872687 | 0.02796201 | 4.00004336 |
| MIR300      | NR_030582.1 | MIR300       | Homo sapiens microRNA 300       | 0.00245092 | 0.0034407  | 3.99348996 |
| DMXL2       | NM_015263.1 | DMXL2        | 15 Homo sapiens KIAA0856; FL    | 0.02010989 | 0.02071184 | 3.98842904 |
| LOC646762   | XM_929714.1 | LOC646762    | 7 PREDICTED: Homo sapiens h     | 0.03606159 | 0.03379666 | 3.9673496  |
| ATG16L2     | NM_033388.1 | ATG16L2      | 11 Homo sapiens FLJ00012; WC    | 0.0044259  | 0.00570568 | 3.96313865 |
| FAM38B      | NM_022068.1 | FAM38B       | 18 Homo sapiens HsT748; FLJ2    | 0.03037871 | 0.02930652 | 3.95819825 |
| LOC643130   | XM_926504.1 | LOC643130    | 21 PREDICTED: Homo sapiens s    | 0.00941035 | 0.0109085  | 3.92207598 |
| PROKR2      | NM_144773.2 | PROKR2       | 20 Homo sapiens PKR2; GPR73L    | 0.04842171 | 0.04320676 | 3.89453034 |
| LOC553158   | NM_181334.3 | LOC553158    | 22 Homo sapiens PRR5-ARHGAP     | 0.01127798 | 0.01270093 | 3.87792603 |
|             | Hs.545116   | HS.545116    | 7 UI-CF-DU1-adm-j-21-0-UI.s1    | 0.05228741 | 0.04598734 | 3.87458191 |
| LOC402693   | XM_938753.1 | LOC402693    | PREDICTED: Homo sapiens s       | 0.00027338 | 0.0005428  | 3.8484447  |
| SLC35B3     | NM_015948.2 | SLC35B3      | 6 Homo sapiens PAPST2; C6orf    | 0.03875234 | 0.03588528 | 3.8450054  |
| ZNF507      | NM_014910.2 | ZNF507       | 19 Homo sapiens zinc finger pro | 0.03460956 | 0.03262752 | 3.84222691 |
| LOC10012954 | XM_00171506 | LOC100129543 | PREDICTED: Homo sapiens h       | 0.00120478 | 0.00188594 | 3.83286101 |
| ZNF83       | NM_018300.2 | ZNF83        | 19 Homo sapiens MGC33853; Fl    | 3.7119E-05 | 0.00010752 | 3.83061914 |
| LOC10013366 | XM_00172080 | LOC100133669 | PREDICTED: Homo sapiens s       | 0.00498841 | 0.0063368  | 3.81985177 |
| CHRNA2      | NM_000742.1 | CHRNA2       | 8 Homo sapiens cholinergic rec  | 0.00386512 | 0.00509274 | 3.77352581 |
| CCDC64B     | NM_00110317 | CCDC64B      | 16 Homo sapiens MGC158069       | 0.01773817 | 0.01860991 | 3.7092534  |
| LOC554203   | XR_001081.1 | LOC554203 X  | PREDICTED: Homo sapiens h       | 0.020827   | 0.02134269 | 3.69220936 |
|             | Hs.560106   | HS.560106    | BX103457 Soares fetal liver :   | 0.03904981 | 0.03611501 | 3.68865075 |
| BAK1        | NM_001188.2 | BAK1         | 6 Homo sapiens MGC3887; BC      | 0.00538778 | 0.00677449 | 3.66831854 |
| ERAP2       | NM_022350.1 | ERAP2        | 5 Homo sapiens LRAP; FLJ236     | 0.0162234  | 0.01724965 | 3.66469485 |
| LOC131909   | XR_041879.1 | LOC131909    | PREDICTED: Homo sapiens n       | 7.1101E-06 | 2.9111E-05 | 3.65363406 |
| EDEM3       | NM_025191.2 | EDEM3        | 1 Homo sapiens C1orf22          | 4.989E-06  | 2.2356E-05 | 3.63137645 |
| MAN2C1      | NM_006715.2 | MAN2C1       | 15 Homo sapiens MANGA8; DKF     | 0.02605861 | 0.02583191 | 3.61818989 |
| ZNF271      | NM_006629.3 | ZNF271       | 18 Homo sapiens HZF7; ZNFEB     | 0.00020676 | 0.00043162 | 3.59614867 |
| LOC121792   | XM_938662.1 | LOC121792    | PREDICTED: Homo sapiens s       | 0.00570886 | 0.00712511 | 3.59549803 |
| RABGAP1L    | NM_014857.2 | RABGAP1L     | 1 Homo sapiens TBC1D18; EVI     | 0.03347899 | 0.03171503 | 3.56844502 |
| MOGAT3      | NM_178176.2 | MOGAT3       | 7 Homo sapiens DGAT2L7; MG      | 0.03978378 | 0.03667397 | 3.54851333 |
| C1orf203    | NR_024125.1 | C1ORF203     | Homo sapiens chromosome 1       | 0.00520639 | 0.00657278 | 3.54542905 |
|             | Hs.564097   | HS.564097    | 10 UI-H-DT0-aub-e-14-0-UI.s1    | 0.04290687 | 0.03904832 | 3.51088197 |
| LOC644264   | XM_927442.1 | LOC644264    | 17 PREDICTED: Homo sapiens s    | 0.01342935 | 0.01470291 | 3.50580057 |
| RASA2       | NM_006506.2 | RASA2        | 3 Homo sapiens GAP1M            | 0.00689157 | 0.00834829 | 3.49682676 |
| LOC644094   | XM_931995.1 | LOC644094    | 1 PREDICTED: Homo sapiens h     | 0.01065686 | 0.01211025 | 3.49179944 |
| LOC646869   | XM_943845.1 | LOC646869    | PREDICTED: Homo sapiens h       | 0.00084333 | 0.0013906  | 3.47612177 |
| LOC652271   | XM_941686.1 | LOC652271    | PREDICTED: Homo sapiens s       | 0.0037412  | 0.00494804 | 3.46790367 |
|             | Hs.543109   | HS.543109    | 3 we81d02.x1 Soares_NFL_T_(     | 0.00022558 | 0.00046341 | 3.46081825 |
| LOC10013481 | XM_00171466 | LOC10013481  | 7 PREDICTED: Homo sapiens h     | 0.05518458 | 0.04819724 | 3.4516513  |
| DTYMK       | NM_012145.2 | DTYMK        | 2 Homo sapiens CDC8; TYMK;      | 0.01376998 | 0.01500842 | 3.40969601 |
|             | Hs.492496   | HS.492496    | 8 UI-E-EJ0-ahm-h-09-0-UI.s1     | 0.02720937 | 0.02677001 | 3.3740499  |
| SMPD4       | NM_017751.1 | SMPD4        | 2 Homo sapiens KIAA1418; FL     | 0.00434603 | 0.00562006 | 3.37144843 |
| AACSL       | XM_376454.3 | AACSL        | 5 PREDICTED: Homo sapiens a     | 0.00773696 | 0.00921087 | 3.35463829 |
|             | Hs.526748   | HS.526748    | 2 UI-CF-FN0-af-r-k-03-18-UI.s1  | 0.04468666 | 0.04044571 | 3.35451174 |
| ZNF561      | NM_152289.1 | ZNF561       | 19 Homo sapiens MGC45408        | 0.05644801 | 0.04911492 | 3.3496148  |
| EZH1        | NM_001991.2 | EZH1         | 17 Homo sapiens KIAA0388        | 0.02060772 | 0.02114267 | 3.34486436 |
| UBE2DNL     | NR_024062.1 | UBE2DNL X    | Homo sapiens ubiquitin-conjt    | 0.01551869 | 0.01659691 | 3.34217851 |
| LOC149086   | XM_097580.5 | LOC149086    | 1 PREDICTED: Homo sapiens h     | 0.00615779 | 0.00761178 | 3.32534199 |
| COL9A3      | NM_001853.2 | COL9A3       | 20 Homo sapiens EDM3; FLJ907    | 0.04731818 | 0.04239021 | 3.32487068 |
| LOC139116   | XM_066484.1 | LOC139116 X  | PREDICTED: Homo sapiens s       | 0.0159754  | 0.01701483 | 3.32217846 |
| INSL5       | NM_005478.3 | INSL5        | 1 Homo sapiens PRO182; UNQ      | 0.03416964 | 0.03225785 | 3.31631402 |
| XAGE1E      | XM_931959.1 | XAGE1E X     | Homo sapiens X antigen fami     | 0.05312395 | 0.04660629 | 3.31419285 |
| LOC730041   | XR_042440.1 | LOC730041    | PREDICTED: Homo sapiens s       | 0.00280615 | 0.00385127 | 3.30614214 |
| L3MBTL4     | NM_173464.1 | L3MBTL4      | Homo sapiens HsT1031            | 0.0118837  | 0.01326222 | 3.30110309 |
| LOC654346   | XM_934665.1 | LOC654346    | 17 PREDICTED: Homo sapiens s    | 0.0308394  | 0.02964015 | 3.29283458 |
| LOC653701   | XM_929047.1 | LOC653701    | 19 PREDICTED: Homo sapiens s    | 0.04308042 | 0.03919406 | 3.28611279 |
| LOC642456   | XM_925964.1 | LOC642456    | 1 PREDICTED: Homo sapiens h     | 0.01705433 | 0.01801959 | 3.27063025 |
| OSBPL11     | NM_022776.3 | OSBPL11      | 3 Homo sapiens FLJ13164; FLJ    | 0.02378557 | 0.02393836 | 3.27038537 |
|             | Hs.571151   | HS.571151    | 6 AV705309 ADB Homo sapien      | 0.02954444 | 0.02864975 | 3.26688455 |
|             | Hs.154948   | HS.154948    | 5 BX106991 NCI_CGAP_GC4 H       | 0.00154539 | 0.00232498 | 3.26630676 |
| LOC415056   | NR_024369.1 | LOC415056    | 9 Homo sapiens hypothetical L   | 0.02465411 | 0.02471608 | 3.2661256  |
|             | Hs.527885   | HS.527885    | 12 BX106259 Soares_testis_NH    | 0.05235525 | 0.04603316 | 3.26298087 |
| NAIF1       | NM_197956.3 | NAIF1        | 9 Homo sapiens nuclear apopt    | 0.0361206  | 0.03384474 | 3.25860924 |
|             | Hs.539161   | HS.539161    | 12 z170b11.s1 Stratagene colon  | 0.01748404 | 0.0184005  | 3.24059223 |
| LOC728208   | XR_040782.1 | LOC728208    | PREDICTED: Homo sapiens n       | 0.03415933 | 0.03225158 | 3.23152307 |
| LOC339483   | XR_040225.1 | LOC339483    | PREDICTED: Homo sapiens n       | 0.02486936 | 0.02487503 | 3.22290247 |
| LOC649120   | XM_938201.1 | LOC649120    | PREDICTED: Homo sapiens s       | 0.05659438 | 0.04920812 | 3.22081536 |
| FLJ32255    | XM_943636.1 | FLJ32255     | PREDICTED: Homo sapiens h       | 0.03379324 | 0.03196097 | 3.19669383 |
|             | Hs.575322   | HS.575322    | UI-E-DX0-ags-g-08-0-UI.s1       | 0.01922802 | 0.01992755 | 3.19466488 |
| LOC10013432 | XM_00171559 | LOC100134320 | PREDICTED: Homo sapiens h       | 0.01453598 | 0.01570287 | 3.17865105 |
|             | Hs.22381    | HS.22381     | 2 602419370F1 NIH_MGC_93        | 0.03543403 | 0.03330457 | 3.17598592 |

5.0 Upreg

|             |             |              |    |                              |            |            |            |
|-------------|-------------|--------------|----|------------------------------|------------|------------|------------|
| FLJ33534    | NM_182586.1 | FLJ33534     | 2  | Homo sapiens hypothetical p  | 0.0364418  | 0.03408382 | 3.17462816 |
|             | Hs.570107   | HS.570107    | 2  | UI-E-DW1-ahc-b-12-0-UI.s1    | 0.02141684 | 0.0218756  | 3.1686954  |
| LOC648689   | XM_937764.1 | LOC648689    |    | PREDICTED: Homo sapiens h    | 0.00351927 | 0.00469629 | 3.16330077 |
| LOC648615   | XM_937684.1 | LOC648615    |    | PREDICTED: Homo sapiens h    | 0.00976945 | 0.01125488 | 3.1426042  |
| LOC647311   | XM_930382.1 | LOC647311    | 14 | PREDICTED: Homo sapiens h    | 0.04302904 | 0.03915138 | 3.11391059 |
|             | Hs.554507   | HS.554507    | 9  | Homo sapiens primary neuro   | 0.03294133 | 0.03127323 | 3.10368704 |
| SNORD17     | NR_003045.1 | SNORD17      | 20 | Homo sapiens HBI-43          | 0.00213579 | 0.00306651 | 3.10312093 |
| PRO0628     | NR_002764.1 | PRO0628      | 20 | Homo sapiens hypothetical L  | 0.03331976 | 0.03158807 | 3.09116378 |
| C1orf161    | NM_152367.1 | C1ORF161     | 1  | Homo sapiens FLJ38716; RP!   | 0.00901192 | 0.0105147  | 3.0904345  |
| LOC643432   | XM_932844.1 | LOC643432    | 6  | PREDICTED: Homo sapiens h    | 0.01101321 | 0.01245391 | 3.08943399 |
| LOC649641   | XM_942147.1 | LOC649641    |    | PREDICTED: Homo sapiens h    | 0.03111332 | 0.0298609  | 3.08716777 |
| LOC644631   | XM_932272.1 | LOC644631    | 4  | PREDICTED: Homo sapiens h    | 0.00517526 | 0.00653914 | 3.08499098 |
|             | Hs.412918   | HS.412918    |    | Homo sapiens cDNA FLJ3255    | 0.05535547 | 0.04830322 | 3.08154348 |
|             | Hs.544713   | HS.544713    | 6  | zt62c04.s1 Soares_testis_NH  | 0.02702227 | 0.02661579 | 3.07618289 |
| LOC10012900 | XM_00171952 | LOC100129002 |    | PREDICTED: Homo sapiens h    | 0.00051957 | 0.00092884 | 3.07453978 |
| LOC653043   | XM_925278.1 | LOC653043    | 9  | PREDICTED: Homo sapiens s    | 0.00051695 | 0.00092528 | 3.06482997 |
| FLJ16331    | NM_00100432 | FLJ16331     | 11 | Homo sapiens FLJ16331 prot   | 0.01767151 | 0.01854885 | 3.06058272 |
|             | Hs.559121   | HS.559121    | 1  | BX116710 Soares_testis_NH'   | 0.0297075  | 0.02877925 | 3.06017962 |
| LOC731835   | Hs.569307   | LOC731835    |    | PREDICTED: Homo sapiens h    | 0.03022762 | 0.02919929 | 3.05419221 |
| LOC644168   | XM_927369.1 | LOC644168    |    | PREDICTED: Homo sapiens s    | 0.04847134 | 0.04324664 | 3.05086924 |
|             | Hs.574008   | HS.574008    | 12 | Homo sapiens unknown mRNA    | 0.01280786 | 0.01412116 | 3.03591789 |
| ZNF563      | NM_145276.1 | ZNF563       | 19 | Homo sapiens FLJ34797        | 0.04103887 | 0.03761361 | 3.03271216 |
| LOC653799   | XM_930003.1 | LOC653799    | 22 | PREDICTED: Homo sapiens s    | 0.01155614 | 0.01296096 | 3.01954309 |
| LOC729669   | XM_00113048 | LOC729669    |    | PREDICTED: Homo sapiens h    | 0.04669469 | 0.04191296 | 3.01037118 |
| ZNF586      | NM_017652.2 | ZNF586       | 19 | Homo sapiens FLJ20070        | 0.00323375 | 0.00435702 | 3.00449752 |
| LOC653234   | XM_934219.1 | LOC653234    | 10 | PREDICTED: Homo sapiens s    | 0.01071825 | 0.01216426 | 2.98978507 |
| LOC728119   | Hs.221513   | LOC728119    |    | PREDICTED: Homo sapiens h    | 0.04041974 | 0.03713148 | 2.97219998 |
|             | Hs.542544   | HS.542544    | 21 | xj38e12.x1 Soares_NFL_T_G    | 0.04001798 | 0.03684729 | 2.95122391 |
|             | Hs.540121   | HS.540121    | 14 | EST7714 human nasopharyn     | 0.04104576 | 0.037616   | 2.94977316 |
| LOC649107   | XM_943581.1 | LOC649107    |    | PREDICTED: Homo sapiens h    | 0.00233808 | 0.00331037 | 2.94960696 |
| CCT6B       | NM_006584.2 | CCT6B        | 17 | Homo sapiens TSA303; Cctz    | 0.03023808 | 0.02920618 | 2.93779723 |
| LOC653060   | XM_925779.1 | LOC653060    | 9  | PREDICTED: Homo sapiens s    | 0.01061288 | 0.01207279 | 2.9359974  |
| NT5M        | NM_020201.3 | NT5M         | 17 | Homo sapiens dNF-2; dNT2;    | 0.00440999 | 0.00569018 | 2.93593326 |
| KRT15       | NM_002275.2 | KRT15        | 17 | Homo sapiens K1CO; K15; C    | 1.272E-05  | 4.6042E-05 | 2.91285088 |
| KRTAP10-3   | NM_198696.2 | KRTAP10-3    | 21 | Homo sapiens KAP10.3; KAP    | 0.05413962 | 0.04743095 | 2.91020304 |
|             | Hs.127279   | HS.127279    | 17 | UI-H-FT1-bkc-b-11-0-UI.s1 M  | 0.03284341 | 0.0312039  | 2.90021704 |
| LOC389267   | XM_371726.2 | LOC389267    | 5  | PREDICTED: Homo sapiens s    | 0.05058152 | 0.04472911 | 2.89434414 |
|             | Hs.574140   | HS.574140    | 14 | UI-E-EJ0-aip-b-05-0-UI.s1 U  | 0.0204813  | 0.0210351  | 2.88770595 |
| TSN         | NM_004622.2 | TSN          | 2  | Homo sapiens REHF-1; TRSL    | 0.01472788 | 0.0158789  | 2.88560852 |
| HIST1H2AD   | NM_021065.2 | HIST1H2AD    | 6  | Homo sapiens H2AFG; H2A/c    | 0.04652321 | 0.04180609 | 2.87963927 |
| ZNF12       | NM_016265.2 | ZNF12        | 7  | Homo sapiens HZF11; ZNF32    | 0.01799807 | 0.0188263  | 2.86346721 |
| LOC645781   | XM_933141.1 | LOC645781    | 19 | PREDICTED: Homo sapiens s    | 0.01382242 | 0.01505623 | 2.86239556 |
|             | Hs.562197   | HS.562197    | 1  | 602137688F1 NIH_MGC_83 I     | 0.01146031 | 0.01287487 | 2.86148773 |
|             | Hs.285193   | HS.285193    | 15 | Homo sapiens cDNA clone IM   | 0.02486409 | 0.0248726  | 2.8542481  |
|             | Hs.399823   | HS.399823    | 16 | AGENCOURT_7906098 NIH_I      | 0.01531163 | 0.01641949 | 2.83566387 |
|             | Hs.539599   | HS.539599    | 13 | hv29g09.x1 NCI_CGAP_Lu24     | 0.0270973  | 0.02667771 | 2.83011081 |
| OR2Y1       | NM_00100165 | OR2Y1        | 5  | Homo sapiens OR5-2           | 0.0235971  | 0.02377868 | 2.82997904 |
| EHHADH      | NM_001966.2 | EHHADH       | 3  | Homo sapiens ECHD; LBFP; I   | 0.01481035 | 0.01595017 | 2.8293226  |
| LOC652350   | XM_941778.1 | LOC652350    |    | PREDICTED: Homo sapiens s    | 0.02354959 | 0.02373899 | 2.82773775 |
|             | Hs.538703   | HS.538703    | 11 | yj18b03.s1 Soares_placenta I | 0.04031652 | 0.03705218 | 2.81975465 |
|             | Hs.576601   | HS.576601    | 10 | DB297320 BRACE2 Homo sa      | 0.00244631 | 0.00343533 | 2.81677551 |
|             | Hs.583098   | HS.583098    | 7  | DB305811 BRAWH3 Homo sa      | 0.02437926 | 0.0244713  | 2.81456393 |
| MIR517B     | NR_030205.1 | MIR517B      |    | Homo sapiens microRNA 517    | 0.03301637 | 0.0313343  | 2.81439711 |
| LOC646103   | XM_373058.2 | LOC646103    | 5  | PREDICTED: Homo sapiens s    | 0.02895623 | 0.02815091 | 2.81391109 |
| LOC10012990 | XM_00172603 | LOC10012990  | 6  | PREDICTED: Homo sapiens h    | 0.03956358 | 0.03651702 | 2.81068162 |
|             | Hs.129094   | HS.129094    | 1  | BX093818 NCI_CGAP_Lu5 H      | 0.05194167 | 0.04573369 | 2.80585206 |
| LOC644655   | XM_927761.1 | LOC644655    | 1  | PREDICTED: Homo sapiens s    | 0.00136655 | 0.00209765 | 2.80078513 |
| AQP12B      | NM_00110246 | AQP12B       | 2  | Homo sapiens INSSA3; MGC:    | 0.01006993 | 0.01153742 | 2.80041191 |
| DCDC1       | NM_181807.1 | DCDC1        | 11 | Homo sapiens doublecortin d  | 0.03627043 | 0.0339525  | 2.79271064 |
| C3orf41     | XM_934359.1 | C3ORF41      | 3  | PREDICTED: Homo sapiens c    | 0.03177572 | 0.03041014 | 2.79234761 |
| TMEM150B    | XM_209187.5 | TMEM150B     | 19 | Homo sapiens transmembran    | 0.01357494 | 0.01482715 | 2.78439393 |
| LOC150223   | NM_00101796 | LOC150223    | 22 | Homo sapiens hypothetical p  | 0.02553214 | 0.02540186 | 2.77626259 |
| IL4I1       | NM_172374.1 | IL4I1        | 19 | Homo sapiens FIG1            | 0.00585033 | 0.00727477 | 2.77582743 |
| LOC649396   | XM_938466.1 | LOC649396    |    | PREDICTED: Homo sapiens h    | 0.00984694 | 0.01132631 | 2.77297827 |
| LOC729766   | Hs.216363   | LOC729766    | 1  | PREDICTED: Homo sapiens h    | 0.01774925 | 0.01861708 | 2.76740045 |
| KCTD17      | NM_024681.1 | KCTD17       | 22 | Homo sapiens FLJ12242        | 0.00273582 | 0.00377067 | 2.76527777 |
| CCDC135     | NM_032269.3 | CCDC135      | 16 | Homo sapiens DKFZp434I09!    | 0.05175371 | 0.04561397 | 2.75649163 |
| LOC10013303 | XM_00171676 | LOC10013303  | 9  | PREDICTED: Homo sapiens h    | 0.01423599 | 0.01543771 | 2.75463247 |
| TEKT4       | NM_144705.2 | TEKT4        | 2  | Homo sapiens MGC27019        | 0.00305236 | 0.00414701 | 2.7543932  |
|             | Hs.569340   | HS.569340    | 14 | DA483022 FCBBF1 Homo sa      | 0.0137157  | 0.01496041 | 2.75349109 |

5.0 Upreg

|             |             |               |                                 |            |            |            |
|-------------|-------------|---------------|---------------------------------|------------|------------|------------|
| LOC648403   | XM_937452.1 | LOC648403     | PREDICTED: Homo sapiens s       | 0.02770465 | 0.02716288 | 2.75275138 |
| LOC344328   | XR_038996.1 | LOC344328     | PREDICTED: Homo sapiens n       | 0.03249927 | 0.03095403 | 2.74738531 |
| LOC10012989 | XM_00171987 | LOC100129890  | PREDICTED: Homo sapiens s       | 0.00816192 | 0.00965652 | 2.74720946 |
| LOC647726   | XM_929571.1 | LOC647726     | PREDICTED: Homo sapiens s       | 0.01756833 | 0.01846485 | 2.73606544 |
|             | Hs.582537   | HS.582537     | 5 DKFZp686N20145_r1 686 (s      | 0.0320648  | 0.03061667 | 2.73115695 |
|             | Hs.541726   | HS.541726     | 2 UI-CF-DU1-adj-b-02-0-UI.s1    | 0.00128787 | 0.00199502 | 2.72351604 |
| LOC10012953 | XM_00172276 | LOC100129532  | PREDICTED: Homo sapiens h       | 0.01914197 | 0.01985245 | 2.71967264 |
| LOC653392   | XM_929544.1 | LOC653392     | 7 PREDICTED: Homo sapiens s     | 0.01097226 | 0.01241241 | 2.71217847 |
| LOC388820   | XR_042089.1 | LOC388820     | 21 PREDICTED: Homo sapiens n    | 0.00268096 | 0.00370962 | 2.70815076 |
| MRPS36      | NM_033281.5 | MRPS36        | 5 Homo sapiens MRP-S36; MGI     | 0.04052907 | 0.03720076 | 2.707026   |
| CLK2P       | XM_935713.1 | CLK2P         | 7 Homo sapiens CDC-like kinas   | 0.0236529  | 0.02381849 | 2.70676106 |
| LOC441958   | XM_928605.1 | LOC441958     | 13 PREDICTED: Homo sapiens h    | 0.00584004 | 0.00726404 | 2.70567659 |
| LOC645165   | XM_928202.1 | LOC645165     | 6 PREDICTED: Homo sapiens h     | 0.01344762 | 0.01471557 | 2.70436389 |
|             | Hs.544465   | HS.544465     | 6 RST2825 Athersys RAGE Libr    | 0.02869008 | 0.0279386  | 2.70276709 |
| LOC10013277 | XM_00172033 | LOC10013277   | 9 PREDICTED: Homo sapiens s     | 0.00154673 | 0.00232619 | 2.69850567 |
| LOC645804   | XR_037755.1 | LOC645804     | PREDICTED: Homo sapiens n       | 0.01232025 | 0.01366944 | 2.69469194 |
|             | Hs.565987   | HS.565987     | 3 UI-H-EI1-aza-j-19-0-UI.s1 N   | 0.03862843 | 0.03579698 | 2.69224467 |
|             | Hs.571950   | HS.571950     | ym35h10.s1 Soares infant br     | 0.01347337 | 0.01474006 | 2.68766182 |
| LOC441453   | XR_041341.1 | LOC441453     | 11 PREDICTED: Homo sapiens n    | 0.00918448 | 0.01069046 | 2.67245772 |
|             | Hs.148886   | HS.148886     | 11 qj94h02.x1 NCI_CGAP_Kid3     | 0.02181004 | 0.02219711 | 2.66629748 |
|             | Hs.164030   | HS.164030     | 12 UI-E-E00-ahx-p-21-0-UI.r1 l  | 0.04738346 | 0.04244002 | 2.66448948 |
| KIR2DL1     | NM_014218.1 | KIR2DL1       | 19 Homo sapiens KIR-K65; CL-4   | 0.00331023 | 0.00445049 | 2.66081062 |
|             | Hs.574671   | HS.574671     | 2 AV645572 GLC Homo sapien:     | 0.00575048 | 0.00716279 | 2.65807744 |
| HAUS5       | NM_015302.1 | HAUS5         | 19 Homo sapiens HAUS augmin-    | 0.02978926 | 0.02883934 | 2.64905092 |
| NOX5        | NM_024505.2 | NOX5          | 15 Homo sapiens NOX5A; MGC1     | 0.03045381 | 0.0293596  | 2.64895332 |
| LOC642228   | XM_936381.1 | LOC642228     | PREDICTED: Homo sapiens h       | 0.03021386 | 0.02918921 | 2.64751279 |
|             | Hs.574069   | HS.574069     | 12 ou17h07.s1 Soares_NFL_T_C    | 0.00030765 | 0.00060052 | 2.64508562 |
| ZNF367      | NM_153695.2 | ZNF367        | 9 Homo sapiens ZFF29; CDC14     | 0.03291306 | 0.03125316 | 2.64489858 |
| ZNF124      | NM_003431.2 | ZNF124        | 1 Homo sapiens MGC117046; I     | 0.02654998 | 0.02625079 | 2.64030563 |
|             | Hs.575696   | HS.575696     | HESC3_16_C05.g1_A036 Hu         | 0.05364979 | 0.0470488  | 2.63736138 |
|             | Hs.538299   | HS.538299     | 10 ob97f11.s1 NCI_CGAP_GCB1     | 0.05505929 | 0.04810218 | 2.63718402 |
| LOC647836   | XM_936893.1 | LOC647836     | PREDICTED: Homo sapiens s       | 0.01329222 | 0.01457278 | 2.63609466 |
| CA13        | NM_198584.1 | CA13          | 8 Homo sapiens MGC59868; C      | 0.00234964 | 0.00332458 | 2.63169041 |
| LOC729810   | XR_040841.1 | LOC729810     | 1 PREDICTED: Homo sapiens n     | 0.04246671 | 0.03872406 | 2.63048216 |
|             | Hs.333693   | HS.333693     | 2 RST32057 Athersys RAGE Lit    | 0.04596728 | 0.04139131 | 2.61880583 |
| TMEM105     | NM_178520.2 | TMEM105       | 17 Homo sapiens FLJ38792        | 0.05606048 | 0.0488213  | 2.6072419  |
| MIR373      | NR_029866.1 | MIR373        | Homo sapiens microRNA 373       | 0.02550677 | 0.02538525 | 2.60500989 |
| LOC643246   | XM_926608.1 | LOC643246     | 12 PREDICTED: Homo sapiens s    | 0.01522745 | 0.0163412  | 2.59854921 |
| LOC728257   | XR_015365.2 | LOC728257     | PREDICTED: Homo sapiens n       | 0.00082538 | 0.00136819 | 2.59820643 |
| LOC731642   | XR_039391.1 | LOC731642     | PREDICTED: Homo sapiens n       | 0.04108701 | 0.03763807 | 2.5956838  |
| LOC652876   | XM_942592.1 | LOC652876     | PREDICTED: Homo sapiens s       | 0.0340591  | 0.0321708  | 2.59484549 |
| OR4C15      | NM_00100192 | OR4C15        | 11 Homo sapiens OR11-127; OF    | 0.00616814 | 0.00762243 | 2.58894762 |
|             | Hs.570139   | HS.570139     | 2 DA266249 BRCAN2 Homo sa       | 0.04393485 | 0.03986394 | 2.58562599 |
|             | Hs.395787   | HS.395787     | 7 BX106738 Soares fetal liver : | 0.04569091 | 0.04120165 | 2.5830175  |
| MIR9-1      | NR_029691.1 | MIR9-1        | Homo sapiens microRNA 9-1       | 0.04293053 | 0.03906581 | 2.57379747 |
|             | Hs.117869   | HS.117869     | 14 K-EST0222744 L17N670205r     | 0.04754597 | 0.0425682  | 2.56992706 |
| VGLL1       | NM_016267.2 | VGLL1         | Homo sapiens VGL1; TDU          | 0.02380979 | 0.02395449 | 2.56874589 |
| SNORD53     | NR_002741.1 | SNORD53       | 2 Homo sapiens RNU53; U53       | 0.00838608 | 0.00988706 | 2.55939644 |
| LOC731444   | XM_925913.1 | LOC731444     | PREDICTED: Homo sapiens s       | 0.0135632  | 0.01481802 | 2.55509058 |
| OR11H4      | NM_00100447 | OR11H4        | 14 Homo sapiens OR14-36         | 0.01751927 | 0.01842432 | 2.55144372 |
| LOC643397   | XM_938878.1 | LOC643397     | 2 PREDICTED: Homo sapiens s     | 0.02530296 | 0.02521388 | 2.54967823 |
| DKFZp686O13 | XM_379141.3 | DKFZp686O1327 | PREDICTED: Homo sapiens h       | 0.04904525 | 0.04365659 | 2.54312964 |
|             | Hs.543093   | HS.543093     | 3 UI-1-BC0-afw-h-09-0-UI.s1 l   | 0.05743081 | 0.0497972  | 2.53276325 |
| REP15       | NM_00102987 | REP15         | 12 Homo sapiens RAB15 effecto   | 0.05444236 | 0.0476201  | 2.53249681 |
| LOC652789   | XM_942448.1 | LOC652789     | PREDICTED: Homo sapiens s       | 0.03555002 | 0.03340643 | 2.52052227 |
| LOC642515   | XM_926011.1 | LOC642515     | 9 PREDICTED: Homo sapiens s     | 0.01770922 | 0.01858399 | 2.51483006 |
|             | Hs.128035   | HS.128035     | qf54c05.x1 Soares_testis_Nf     | 0.02477797 | 0.02480341 | 2.51162347 |
| CIZ1        | NM_012127.2 | CIZ1          | 9 Homo sapiens LSFRI; ZNF35     | 0.01492095 | 0.01605155 | 2.50645786 |
|             | Hs.430335   | HS.430335     | QV0-HT0398-210100-096-c0        | 0.05098431 | 0.04505805 | 2.5054305  |
| SUPT6H      | NM_003170.3 | SUPT6H        | 17 Homo sapiens MGC87943; SI    | 0.00083575 | 0.00138096 | 2.50242594 |
|             | Hs.565908   | HS.565908     | 3 UI-E-E01-aiv-l-12-0-UI.s1 U   | 0.00492132 | 0.00626428 | 2.49691608 |
| PCIF1       | NM_022104.3 | PCIF1         | 20 Homo sapiens PCIF1           | 0.00815384 | 0.00964825 | 2.49572125 |
|             | Hs.126963   | HS.126963     | 16 wq04a09.x1 NCI_CGAP_Kid1     | 0.01340024 | 0.01467653 | 2.49037895 |
|             | Hs.543759   | HS.543759     | 4 wy86a10.x1 Soares_NSF_F8      | 0.02797921 | 0.0273984  | 2.48631626 |
|             | Hs.562917   | HS.562917     | BX118281 NCI_CGAP_CLL1 f        | 0.01878103 | 0.01951732 | 2.48479056 |
|             | Hs.572624   | HS.572624     | 19 hz27a12.x1 NCI_CGAP_GC6      | 0.02465197 | 0.02471676 | 2.47471674 |
| ZNF345      | NM_003419.2 | ZNF345        | 19 Homo sapiens HZF10           | 0.0275961  | 0.02708066 | 2.4692362  |
|             | Hs.560098   | HS.560098     | 12 AGENCOURT_7543948 NIH_I      | 0.04414613 | 0.04002254 | 2.46722717 |
| SNORA52     | NR_002585.1 | SNORA52       | 11 Homo sapiens ACA52           | 0.01828039 | 0.0190716  | 2.46217044 |
|             | Hs.98458    | HS.98458      | 4 BX118817 Soares_testis_NH'    | 0.011084   | 0.01252266 | 2.45965951 |

5.0 Upreg

|             |             |             |    |                              |            |            |            |
|-------------|-------------|-------------|----|------------------------------|------------|------------|------------|
| MIP         | NM_012064.2 | MIP         | 12 | Homo sapiens AQP0; LIM1; M   | 0.00959865 | 0.01108722 | 2.45187368 |
| MUC2        | NM_002457.2 | MUC2        | 11 | Homo sapiens SMUC; MLP       | 0.01857599 | 0.0193363  | 2.44869449 |
| TNFSF4      | NM_003326.2 | TNFSF4      | 1  | Homo sapiens TXGP1; OX40I    | 0.02501738 | 0.02499459 | 2.44675706 |
| LOC647527   | XM_942881.1 | LOC647527   |    | PREDICTED: Homo sapiens h    | 0.00706412 | 0.00852435 | 2.43969208 |
| SNORA1      | NR_003026.1 | SNORA1      | 11 | Homo sapiens ACA1            | 0.02792568 | 0.02734903 | 2.4315587  |
| LOC641944   | XM_935704.1 | LOC641944   |    | PREDICTED: Homo sapiens h    | 0.02851574 | 0.02779968 | 2.4305605  |
| LOC644827   | XM_932427.1 | LOC644827   |    | PREDICTED: Homo sapiens h    | 0.03631971 | 0.03398774 | 2.4302268  |
| LOC652614   | XM_942149.1 | LOC652614   |    | PREDICTED: Homo sapiens s    | 0.00251448 | 0.00351083 | 2.4269879  |
| NOS2        | NM_000625.4 | NOS2        | 17 | Homo sapiens nitric oxide sy | 0.00544787 | 0.00683829 | 2.42368882 |
| MIR1471     | NR_031717.1 | MIR1471     |    | Homo sapiens microRNA 147    | 0.03055682 | 0.02943304 | 2.40966623 |
| RGL2        | NM_004761.2 | RGL2        | 6  | Homo sapiens HKE1.5; RAB2    | 0.00477544 | 0.00610339 | 2.39776885 |
|             | Hs.147255   | Hs.147255   |    | BX103599 NCI_CGAP_GC6 H      | 0.01009828 | 0.01156235 | 2.39637504 |
| LOC10013249 | XM_00172266 | LOC10013249 | 1  | PREDICTED: Homo sapiens s    | 0.00435377 | 0.00562841 | 2.39296456 |
|             | Hs.573956   | Hs.573956   | 11 | BX417275 Homo sapiens PL     | 0.01598562 | 0.01702364 | 2.39057997 |
|             | Hs.552826   | Hs.552826   | 1  | Homo sapiens cDNA FLJ3746    | 0.01177618 | 0.01317071 | 2.39007679 |
| LOC649703   | XM_943857.1 | LOC649703   |    | PREDICTED: Homo sapiens h    | 0.05752894 | 0.04986258 | 2.38729006 |
| CYSLTR2     | NM_020377.2 | CYSLTR2     | 13 | Homo sapiens PSEC0146; HC    | 0.01802592 | 0.01885094 | 2.38076688 |
| IRF6        | NM_006147.2 | IRF6        | 1  | Homo sapiens VWS; LPS; PI    | 0.0080183  | 0.00950711 | 2.37694226 |
|             | Hs.574968   | Hs.574968   |    | wm07h02.x1 NCI_CGAP_Ut4      | 0.02696103 | 0.02656441 | 2.37583779 |
| NR6A1       | NM_033334.2 | NR6A1       | 9  | Homo sapiens NR61; GCNF; I   | 0.05221103 | 0.04593398 | 2.37344967 |
| FLJ44290    | NM_198564.1 | FLJ44290    | 3  | Homo sapiens FLJ44290 prot   | 0.01370323 | 0.01495239 | 2.37241028 |
|             | Hs.518008   | Hs.518008   | 3  | zt57d01.s1 Soares_testis_N   | 0.02221518 | 0.02256755 | 2.36563544 |
| LOC646330   | XR_017189.2 | LOC646330   | 1  | PREDICTED: Homo sapiens n    | 0.05150176 | 0.04542385 | 2.36538103 |
|             | Hs.495112   | Hs.495112   | 14 | Human TCR variable region V  | 0.0078774  | 0.00935901 | 2.36537353 |
| TLX3        | NM_021025.2 | TLX3        | 5  | Homo sapiens RNX; MGC298     | 0.00643197 | 0.00788406 | 2.35985847 |
|             | Hs.555595   | Hs.555595   |    | Human (clone xip8) mRNA se   | 0.05436411 | 0.04757538 | 2.35503886 |
| AASDH       | NM_181806.2 | AASDH       | 4  | Homo sapiens LYS2; ACSF4;    | 9.655E-05  | 0.00023298 | 2.35443393 |
|             | Hs.136788   | Hs.136788   | 5  | ac76f10.x5 Stratagene lung ( | 0.01245707 | 0.01379158 | 2.35209226 |
| IFI44       | NM_006417.2 | IFI44       | 1  | Homo sapiens p44; MTAP44     | 0.02740031 | 0.02692165 | 2.34272231 |
|             | Hs.137293   | Hs.137293   | 1  | zb53f02.y5 Soares_fetal_lun  | 0.03843    | 0.03565829 | 2.34129091 |
| LOC642243   | XM_936390.1 | LOC642243   |    | PREDICTED: Homo sapiens s    | 0.01902407 | 0.01973716 | 2.33963992 |
|             | Hs.545428   | Hs.545428   | 8  | nac37g08.x1 Lupski_sciatic_  | 0.03908986 | 0.03614061 | 2.3385835  |
| LOC648289   | XM_937347.1 | LOC648289   |    | PREDICTED: Homo sapiens h    | 0.01458415 | 0.01574328 | 2.33225777 |
| RIMBP3B     | NM_00112863 | RIMBP3B     | 22 | Homo sapiens RIMS binding    | 0.01858023 | 0.01933843 | 2.32769849 |
| PPAPDC2     | NM_203453.2 | PPAPDC2     | 9  | Homo sapiens bA6J24.6; FLJ   | 0.00151152 | 0.00228184 | 2.32229549 |
| LOC648665   | XR_042388.1 | LOC648665   |    | PREDICTED: Homo sapiens n    | 0.04856244 | 0.04331912 | 2.31265625 |
| LOC644403   | XM_932168.1 | LOC644403   | X  | PREDICTED: Homo sapiens h    | 0.05022882 | 0.04447549 | 2.30894472 |
| LOC10012851 | XR_038051.1 | LOC10012851 |    | PREDICTED: Homo sapiens n    | 0.00732888 | 0.00880388 | 2.30725124 |
| LOC647704   | XM_936765.1 | LOC647704   |    | PREDICTED: Homo sapiens s    | 0.05694134 | 0.04945588 | 2.30123334 |
| ZNF608      | NM_020747.1 | ZNF608      | 5  | Homo sapiens NY-REN-36; D    | 0.04781489 | 0.04278277 | 2.30002097 |
| CXCL13      | NM_006419.1 | CXCL13      | 4  | Homo sapiens SCYB13; ANGI    | 0.01964797 | 0.02030283 | 2.29896855 |
|             | Hs.334998   | Hs.334998   | 13 | qd61b01.x1 Soares_testis_N   | 0.0421059  | 0.038459   | 2.29878569 |
| LOC650407   | XM_944179.1 | LOC650407   |    | PREDICTED: Homo sapiens h    | 0.03054201 | 0.02942523 | 2.29852132 |
| LOC647246   | XM_930292.1 | LOC647246   | 1  | PREDICTED: Homo sapiens s    | 0.04952948 | 0.04398499 | 2.29370169 |
| LOC645487   | XM_932932.1 | LOC645487   | 20 | PREDICTED: Homo sapiens h    | 0.01276704 | 0.01408146 | 2.29246125 |
|             | Hs.552427   | Hs.552427   | 17 | Homo sapiens mRNA; cDNA I    | 0.01928154 | 0.01997358 | 2.28801126 |
| LOC652148   | XM_945224.1 | LOC652148   |    | PREDICTED: Homo sapiens h    | 0.00070811 | 0.00119895 | 2.28772797 |
| LOC646082   | XM_929042.1 | LOC646082   | 22 | PREDICTED: Homo sapiens s    | 0.01696812 | 0.01794363 | 2.28600115 |
| PTPRQ       | XM_926134.1 | PTPRQ       | 12 | PREDICTED: Homo sapiens p    | 0.01950703 | 0.02016669 | 2.28294201 |
| LOC645052   | XM_928103.1 | LOC645052   | 1  | PREDICTED: Homo sapiens s    | 0.01351984 | 0.0147817  | 2.28123419 |
| LOC728690   | XM_00171562 | LOC728690   |    | PREDICTED: Homo sapiens h    | 0.0459273  | 0.0413638  | 2.28120866 |
| MANEA       | XM_938989.1 | MANEA       |    | PREDICTED: Homo sapiens n    | 1.0134E-06 | 6.7718E-06 | 2.28068917 |
|             | Hs.444152   | Hs.444152   | 13 | we92b05.x1 Soares_NFL_T_     | 0.02751075 | 0.02701503 | 2.28009464 |
| RESP18      | NM_00100708 | RESP18      |    | Homo sapiens regulated endo  | 0.02722849 | 0.02678583 | 2.27993462 |
| FLJ36492    | NM_182568.2 | FLJ36492    | 17 | Homo sapiens MGC126634       | 0.02210538 | 0.02247943 | 2.27914884 |
| BGLAP       | NM_199173.2 | BGLAP       | 1  | Homo sapiens BGP; PMF1       | 0.03122947 | 0.02994943 | 2.27422421 |
| TFR2        | NM_003227.2 | TFR2        | 7  | Homo sapiens HFE3; MGC12     | 0.02551123 | 0.02538681 | 2.27389335 |
| LSAMP       | NM_002338.2 | LSAMP       | 3  | Homo sapiens LAMP            | 0.03276722 | 0.03115513 | 2.27095444 |
| LOC645320   | XM_939804.1 | LOC645320   |    | PREDICTED: Homo sapiens h    | 0.00360388 | 0.0047859  | 2.2662823  |
|             | Hs.567192   | Hs.567192   | X  | xp82e07.x1 NCI_CGAP_Ov4      | 0.03585649 | 0.03363319 | 2.26466052 |
| LOC731186   | Hs.538470   | LOC731186   |    | PREDICTED: Homo sapiens h    | 0.04790358 | 0.04284465 | 2.26018802 |
| GPR21       | NM_005294.1 | GPR21       | 9  | Homo sapiens G protein-cou   | 0.0379926  | 0.0352935  | 2.25968821 |
| LOC650759   | XM_944798.1 | LOC650759   |    | PREDICTED: Homo sapiens s    | 0.02801734 | 0.02742655 | 2.2590368  |
| LOC648657   | XM_943417.1 | LOC648657   |    | PREDICTED: Homo sapiens h    | 0.00851792 | 0.01001692 | 2.25634071 |
|             | Hs.158036   | Hs.158036   | 5  | BX118491 NCI_CGAP_Brn23      | 0.01348701 | 0.01475131 | 2.25578515 |
|             | Hs.542001   | Hs.542001   | 2  | yz88g11.s1 Soares_multiple_  | 0.04061391 | 0.03727084 | 2.25573916 |
|             | Hs.583323   | Hs.583323   | 7  | UI-CF-FN0-aew-k-13-0-UI.s1   | 0.04325921 | 0.03932004 | 2.25493365 |
|             | Hs.493947   | Hs.493947   | 9  | Homo sapiens cDNA FLJ4145    | 0.04926837 | 0.04381075 | 2.25486557 |
| PISRT1      | NR_027070.1 | PISRT1      | 3  | Homo sapiens polled interse  | 0.02659627 | 0.02629064 | 2.25371271 |
| HSPA7       | NR_024151.1 | HSPA7       | 1  | Homo sapiens heat shock 70   | 0.04610539 | 0.04148587 | 2.24877187 |

5.0 Upreg

|             |             |              |    |                              |            |            |            |
|-------------|-------------|--------------|----|------------------------------|------------|------------|------------|
| LOC645478   | XM_932922.1 | LOC645478    | 16 | PREDICTED: Homo sapiens h    | 0.02472804 | 0.02477321 | 2.24831147 |
| LOC146053   | XM_933251.1 | LOC146053    | 15 | PREDICTED: Homo sapiens s    | 0.0370523  | 0.03456271 | 2.24544148 |
| SLC22A15    | NM_018420.1 | SLC22A15     | 1  | Homo sapiens FLIPT1; DKFZ    | 0.03400154 | 0.0321268  | 2.24367894 |
| OPHN1       | NM_002547.1 | OPHN1        |    | Homo sapiens OPN1; MRX60     | 0.01659918 | 0.01758315 | 2.23869156 |
| FLJ43276    | NM_207382.1 | FLJ43276     | 15 | Homo sapiens FLJ43276 prot   | 0.00036203 | 0.00068726 | 2.23250852 |
| LOC10012955 | NR_024618.1 | LOC10012955  | 3  | Homo sapiens hypothetical L  | 0.00033371 | 0.00064281 | 2.22067389 |
| C8orf17     | NM_020237.1 | C8ORF17      | 8  | Homo sapiens MOST-1          | 0.01875243 | 0.01949222 | 2.21770618 |
|             | Hs.409403   | HS.409403    | 2  | xr75a07.x2 NCI_CGAP_Ov26     | 0.02188224 | 0.02226801 | 2.21740144 |
| OAZ3        | NM_016178.1 | OAZ3         | 1  | Homo sapiens TISP15; OAZ-I   | 0.02735921 | 0.02688729 | 2.21302537 |
| SLFN14      | NM_00112982 | SLFN14       | 17 | Homo sapiens schlafen famili | 0.01807096 | 0.01889129 | 2.21007712 |
|             | Hs.564805   | HS.564805    | 15 | 602976638F1 NIH_MGC_12 I     | 0.00454167 | 0.00584119 | 2.20612788 |
| HOXB3       | NM_002146.3 | HOXB3        | 17 | Homo sapiens HOX2; HOX2G     | 0.03349557 | 0.03172389 | 2.20554181 |
| CASRL1      | XM_293581.5 | CASRL1       | 3  | PREDICTED: Homo sapiens c    | 0.02446392 | 0.02455347 | 2.20251375 |
| LOC651169   | XM_942515.1 | LOC651169    |    | PREDICTED: Homo sapiens h    | 0.02409413 | 0.02422112 | 2.20169069 |
| VPS54       | NM_016516.2 | VPS54        | 2  | Homo sapiens hVps54L; HCC    | 0.0237525  | 0.02391331 | 2.20156052 |
| LOC340274   | XR_017256.2 | LOC340274    | 7  | PREDICTED: Homo sapiens n    | 0.0267591  | 0.02641291 | 2.20106629 |
| CALHM1      | NM_00100141 | CALHM1       | 10 | Homo sapiens calcium homeo   | 0.01037326 | 0.01183857 | 2.19969767 |
| LOC644981   | XM_932554.1 | LOC644981    |    | PREDICTED: Homo sapiens h    | 0.01647692 | 0.01747685 | 2.19883345 |
| FLJ90680    | NM_207475.1 | FLJ90680     | 22 | Homo sapiens FLJ90680 prot   | 0.05703915 | 0.04951143 | 2.19878739 |
| ALB         | NM_000477.3 | ALB          | 4  | Homo sapiens PRO1341; DKF    | 0.05462146 | 0.04775772 | 2.19831143 |
| LOC392364   | XM_928878.1 | LOC392364    | 9  | PREDICTED: Homo sapiens s    | 0.0138989  | 0.01512451 | 2.19554963 |
| SYCE2       | NM_00110557 | SYCE2        | 19 | Homo sapiens CESC1           | 0.04912078 | 0.04370608 | 2.19382388 |
| PHC3        | NM_024947.2 | PHC3         | 3  | Homo sapiens FLJ12729; HPI   | 0.00011958 | 0.00027581 | 2.19149786 |
| LOC644457   | XM_929445.1 | LOC644457    | 3  | PREDICTED: Homo sapiens h    | 0.04602031 | 0.04143056 | 2.18854448 |
|             | Hs.538859   | HS.538859    | 11 | HSU48640 Human fetal brair   | 0.02956029 | 0.02866195 | 2.1857295  |
|             | Hs.201858   | HS.201858    | 3  | BX097814 Soares_NFL_T_GE     | 0.05456086 | 0.04770949 | 2.1838544  |
| KCNH4       | NM_012285.1 | KCNH4        | 17 | Homo sapiens Kv12.3; ELK1;   | 0.01361637 | 0.01486685 | 2.1823626  |
| LOC147645   | XM_937000.1 | LOC147645    |    | PREDICTED: Homo sapiens h    | 0.05337741 | 0.04681929 | 2.1803202  |
| C4orf10     | NR_015453.1 | C4ORF10      | 4  | Homo sapiens chromosome 4    | 0.03265662 | 0.03107692 | 2.17689385 |
| LOC10013345 | XM_00172005 | LOC100133459 |    | PREDICTED: Homo sapiens h    | 0.03853296 | 0.03572738 | 2.17328996 |
|             | Hs.144714   | HS.144714    | 10 | BX095676 Soares_testis_NH    | 0.02731389 | 0.02684876 | 2.17033371 |
| CFC1        | NM_032545.2 | CFC1         | 2  | Homo sapiens CRYPTIC; MGC    | 0.00318536 | 0.0043057  | 2.16907563 |
| GPR89C      | XM_936805.1 | GPR89C       | 1  | Homo sapiens G protein-coupl | 0.00225833 | 0.00321509 | 2.15978454 |
|             | Hs.552282   | HS.552282    | 8  | Homo sapiens mRNA; cDNA I    | 0.02167525 | 0.02208811 | 2.15835627 |
| ZNF502      | NM_033210.3 | ZNF502       | 3  | Homo sapiens FLJ14855; FLJ   | 0.05703377 | 0.04951166 | 2.15448741 |
| LOC642744   | XM_926179.1 | LOC642744    | 14 | PREDICTED: Homo sapiens s    | 0.00269965 | 0.00372784 | 2.15086391 |
| TEP1        | NM_007110.3 | TEP1         | 14 | Homo sapiens VAULT2; TLP1    | 0.05108581 | 0.04512503 | 2.15043655 |
| ANKZF1      | NM_018089.1 | ANKZF1       | 2  | Homo sapiens ZNF744; FLJ1    | 0.00017226 | 0.00037209 | 2.1464585  |
| LOC646334   | XM_929268.1 | LOC646334    | 3  | PREDICTED: Homo sapiens s    | 0.00027018 | 0.00053766 | 2.14596915 |
| LOC642183   | XM_936339.1 | LOC642183    |    | PREDICTED: Homo sapiens s    | 0.04174454 | 0.0381647  | 2.14434791 |
|             | Hs.538716   | HS.538716    | 11 | ob56a07.s1 NCI_CGAP_GCB:     | 0.00269167 | 0.00371859 | 2.13376846 |
| CD207       | NM_015717.1 | CD207        | 2  | Homo sapiens CLEC4K; LANC    | 0.01241054 | 0.01375396 | 2.13339537 |
|             | Hs.516049   | HS.516049    | 2  | ho44f09.x1 Soares_NFL_T_G    | 0.04616807 | 0.04152523 | 2.13123471 |
| LOC153328   | NM_145282.1 | LOC153328    | 5  | Homo sapiens similar to CG4  | 0.03114266 | 0.02987598 | 2.13105179 |
| MARK1       | NM_018650.2 | MARK1        | 1  | Homo sapiens KIAA1477; MC    | 0.02519777 | 0.02513761 | 2.12710514 |
| LIMK1       | NM_002314.2 | LIMK1        | 7  | Homo sapiens LIMK            | 0.04833233 | 0.04315334 | 2.12489255 |
| C7orf54     | NM_014411.2 | C7ORF54      | 7  | Homo sapiens NSG-X; NAG8;    | 0.00060957 | 0.00106055 | 2.11908648 |
| TEKT2       | NM_014466.2 | TEKT2        | 1  | Homo sapiens h-tektin-t; TEL | 0.03236846 | 0.03086295 | 2.11002194 |
|             | Hs.584144   | HS.584144    | 9  | ty82e09.x1 NCI_CGAP_Kid1     | 0.04487478 | 0.04057831 | 2.10939277 |
| ATP6V1G2    | NM_130463.2 | ATP6V1G2     | 6  | Homo sapiens NG38; ATP6G:    | 0.00093734 | 0.00152216 | 2.10636272 |
| LOC440491   | XM_498696.2 | LOC440491    |    | PREDICTED: Homo sapiens h    | 0.04013238 | 0.03693324 | 2.10612585 |
| LOC285908   | NM_181722.2 | LOC285908    | 7  | Homo sapiens hypothetical p  | 0.00226402 | 0.0032211  | 2.08996021 |
| BATF3       | NM_018664.1 | BATF3        | 1  | Homo sapiens JUNDM1; SNF     | 0.05112665 | 0.04515201 | 2.08757805 |
| C2orf89     | NM_00108082 | C2ORF89      | 2  | Homo sapiens FLJ46467        | 0.0059502  | 0.00738118 | 2.08492504 |
| LOC643313   | XM_933038.1 | LOC643313    | 1  | PREDICTED: Homo sapiens s    | 0.03819814 | 0.03546942 | 2.0798921  |
| U1SNRNPBP   | NM_180703.1 | U1SNRNPBP    | 12 | Homo sapiens MGC138160; I    | 0.0001176  | 0.0002724  | 2.07818525 |
| SEMA4A      | NM_022367.2 | SEMA4A       | 1  | Homo sapiens RP11-54H19.2    | 0.01398349 | 0.01519771 | 2.07410966 |
| LOC10012885 | XR_038035.1 | LOC10012885  | 2  | PREDICTED: Homo sapiens n    | 0.01114099 | 0.01256925 | 2.07295977 |
| DCAF10      | NM_024345.3 | DCAF10       | 9  | Homo sapiens MGC131781; I    | 0.0006398  | 0.00110395 | 2.07195484 |
| LOC646825   | XM_929783.1 | LOC646825    | 19 | PREDICTED: Homo sapiens s    | 0.04026766 | 0.03701503 | 2.05846432 |
| ZNF707      | NM_173831.2 | ZNF707       | 8  | Homo sapiens zinc finger pro | 0.00786688 | 0.00934778 | 2.05593287 |
| TNS1        | NM_022648.3 | TNS1         | 2  | Homo sapiens TNS; MGC885     | 0.02808948 | 0.02747265 | 2.0501462  |
| LOC728670   | XM_932235.1 | LOC728670    | 12 | PREDICTED: Homo sapiens s    | 0.04945945 | 0.04394504 | 2.04425688 |
|             | Hs.539159   | HS.539159    | 12 | wm19e03.x1 NCI_CGAP_Ut4      | 0.0148081  | 0.0159497  | 2.04206094 |
| LOC388255   | XM_370973.3 | LOC388255    | 16 | PREDICTED: Homo sapiens s    | 0.03966791 | 0.03659407 | 2.03769546 |
| LOC727726   | XM_937616.1 | LOC727726    | 10 | PREDICTED: Homo sapiens s    | 0.01821353 | 0.01901314 | 2.03739572 |
| SH3BP2      | NM_003023.2 | SH3BP2       | 4  | Homo sapiens CRPM; CRBM;     | 0.00356728 | 0.00474592 | 2.03657098 |
| CCDC22      | NM_014008.1 | CCDC22       |    | Homo sapiens JM1; CXorf37    | 0.00317329 | 0.00429138 | 2.03293011 |
| BLOC1S2     | NM_00100134 | BLOC1S2      | 10 | Homo sapiens RP11-316M21     | 0.03270974 | 0.0311106  | 2.03245879 |
| FZD3        | NM_017412.2 | FZD3         | 8  | Homo sapiens hFz3; Fz-3      | 0.03466103 | 0.03267253 | 2.02462063 |

5.0 Upreg

|             |             |              |    |                             |            |            |            |
|-------------|-------------|--------------|----|-----------------------------|------------|------------|------------|
| CRBN        | NM_016302.2 | CRBN         | 3  | Homo sapiens MGC27358; D    | 7.8924E-07 | 5.6436E-06 | 2.02345241 |
| LOC10012942 | XM_00171488 | LOC10012942  | 7  | PREDICTED: Homo sapiens h   | 0.03763017 | 0.03503471 | 2.02229834 |
| LOC645836   | XM_928820.1 | LOC645836    | 8  | PREDICTED: Homo sapiens s   | 0.00656366 | 0.00802194 | 2.0216774  |
| LOC650494   | XM_944224.1 | LOC650494    |    | PREDICTED: Homo sapiens h   | 0.05073388 | 0.04484125 | 2.01619277 |
| FAM134C     | NM_178126.2 | FAM134C      | 17 | Homo sapiens FLJ33806       | 0.00578781 | 0.00720418 | 2.0146562  |
| LOC648972   | XM_938049.1 | LOC648972    |    | PREDICTED: Homo sapiens s   | 0.05026331 | 0.04449256 | 2.01345508 |
| LOC650140   | XM_942374.1 | LOC650140    |    | PREDICTED: Homo sapiens h   | 0.04680654 | 0.04199188 | 2.01109506 |
| LOC651315   | XM_940450.1 | LOC651315    |    | PREDICTED: Homo sapiens s   | 0.03583105 | 0.0336201  | 2.00553409 |
| SEC14L2     | NM_012429.1 | SEC14L2      | 22 | Homo sapiens KIAA1658; MGC  | 0.00432827 | 0.00560121 | 1.99287681 |
| LOC652404   | XM_945472.1 | LOC652404    |    | PREDICTED: Homo sapiens h   | 0.00422686 | 0.00549592 | 1.98927503 |
| CLVS2       | NM_00101085 | CLVS2        | 6  | Homo sapiens C6orf213; C6c  | 0.04613039 | 0.04149985 | 1.98494308 |
|             | Hs.197017   | HS.197017    | 8  | wa17h04.x1 NCI_CGAP_Kid1    | 0.02942552 | 0.02854389 | 1.98278656 |
| LOC643937   | XM_927195.1 | LOC643937    | 9  | PREDICTED: Homo sapiens h   | 0.05431378 | 0.04754555 | 1.97938346 |
| ACSM2B      | NM_182617.2 | ACSM2B       | 16 | Homo sapiens HYST1046; H    | 0.01475607 | 0.01590538 | 1.97239827 |
| EPHX1       | NM_000120.2 | EPHX1        | 1  | Homo sapiens EPOX; MEH; E   | 2.4627E-05 | 7.7363E-05 | 1.97121476 |
| PHF8        | NM_015107.1 | PHF8         |    | Homo sapiens ZNF422; MRX    | 0.01570807 | 0.01676674 | 1.96553086 |
|             | Hs.526484   | HS.526484    | 15 | UI-CF-EN1-ael-m-17-18-UI.s  | 0.05434957 | 0.0475674  | 1.96546698 |
| KIAA1545    | XM_495939.2 | KIAA1545     | 12 | PREDICTED: Homo sapiens K   | 0.00792899 | 0.00941266 | 1.96540796 |
| LOC652773   | XM_942415.1 | LOC652773    |    | PREDICTED: Homo sapiens s   | 0.02711162 | 0.02668582 | 1.9620027  |
| LOC642468   | XM_931123.1 | LOC642468    | 4  | PREDICTED: Homo sapiens h   | 0.04502418 | 0.04070082 | 1.96073148 |
| RAD51L3     | NM_002878.2 | RAD51L3      | 17 | Homo sapiens R51H3; Trad;   | 0.00248611 | 0.00348063 | 1.96019093 |
| LOC441086   | XM_499003.2 | LOC441086    | 5  | PREDICTED: Homo sapiens h   | 0.02908065 | 0.02826247 | 1.95897757 |
| ANKRD21     | NM_174981.2 | ANKRD21      | 21 | Homo sapiens POTE-21; POT   | 0.02082687 | 0.02134505 | 1.95703244 |
| LOC651881   | XM_942713.1 | LOC651881    |    | PREDICTED: Homo sapiens h   | 0.01046933 | 0.01193114 | 1.95171305 |
| MGC12760    | XM_930480.1 | MGC12760     | 1  | PREDICTED: Homo sapiens h   | 0.04759048 | 0.04259936 | 1.95128764 |
| LOC401305   | XM_376573.3 | LOC401305    | 7  | PREDICTED: Homo sapiens s   | 0.00068246 | 0.00116405 | 1.94006432 |
| LOC651113   | XM_942507.1 | LOC651113    |    | PREDICTED: Homo sapiens h   | 0.04508692 | 0.04074074 | 1.93639123 |
| LOC641765   | XM_927822.1 | LOC641765    | 7  | PREDICTED: Homo sapiens s   | 0.01922969 | 0.01992692 | 1.93560239 |
|             | Hs.583755   | HS.583755    | 8  | Homo sapiens cDNA FLJ3105   | 0.04714016 | 0.04226094 | 1.93298672 |
| LOC730286   | XR_038094.1 | LOC730286    | 7  | PREDICTED: Homo sapiens n   | 0.00188507 | 0.00275338 | 1.93185723 |
| KLHL1       | NM_020866.1 | KLHL1        | 13 | Homo sapiens MRP2; KIAA14   | 0.05297729 | 0.04648692 | 1.93184671 |
| THAP4       | NM_015963.4 | THAP4        | 2  | Homo sapiens CGI-36         | 0.00039411 | 0.00073918 | 1.93006419 |
| ZNF215      | NM_013250.1 | ZNF215       | 11 | Homo sapiens BAZ2           | 0.00051563 | 0.0009233  | 1.9206771  |
| UNC13A      | XM_937931.1 | UNC13A       |    | PREDICTED: Homo sapiens u   | 0.00832196 | 0.00982202 | 1.91518577 |
| CEP76       | NM_024899.2 | CEP76        | 18 | Homo sapiens C18orf9; FLJ1  | 0.00723926 | 0.00870696 | 1.9151486  |
| LOC651137   | XM_945836.1 | LOC651137    |    | PREDICTED: Homo sapiens s   | 0.03567771 | 0.03349773 | 1.90562748 |
| LOC728070   | XM_926169.1 | LOC728070    | 16 | PREDICTED: Homo sapiens s   | 0.03759142 | 0.03500978 | 1.90477138 |
| LOC646307   | XM_929245.1 | LOC646307    | 1  | PREDICTED: Homo sapiens h   | 0.02169116 | 0.02209919 | 1.9024811  |
| C7orf29     | NM_138434.2 | C7ORF29      | 7  | Homo sapiens chromosome 7   | 0.04478726 | 0.04052005 | 1.90156204 |
| SLC26A2     | NM_000112.2 | SLC26A2      | 5  | Homo sapiens DTDST; MSTP:   | 0.00072771 | 0.00122882 | 1.90063575 |
| SELE        | NM_000450.1 | SELE         | 1  | Homo sapiens LECAM2; ESEL   | 0.02053729 | 0.02108274 | 1.89997429 |
|             | Hs.443534   | HS.443534    | 4  | BX117171 NCI_CGAP_Co3 H     | 0.03720706 | 0.03469232 | 1.89993085 |
| LOC652541   | XM_942032.1 | LOC652541    |    | PREDICTED: Homo sapiens h   | 0.00770858 | 0.00918331 | 1.89803229 |
| NCRNA00094  | NR_015427.1 | NCRNA00094   |    | Homo sapiens non-protein cc | 0.02776323 | 0.02721727 | 1.89454939 |
|             | Hs.444939   | HS.444939    | 1  | AV744922 CB Homo sapiens    | 0.004359   | 0.0056335  | 1.89398636 |
| LOC645113   | XM_930333.1 | LOC645113    | 22 | PREDICTED: Homo sapiens h   | 0.03658477 | 0.03419931 | 1.89211639 |
| FLJ30092    | XM_933560.1 | FLJ30092     | 12 | PREDICTED: Homo sapiens A   | 0.04027025 | 0.03701353 | 1.89207629 |
| LOC654115   | XM_939598.1 | LOC654115    |    | PREDICTED: Homo sapiens s   | 0.03312829 | 0.03142353 | 1.89117114 |
| LOC10013150 | XR_038156.1 | LOC100131507 |    | PREDICTED: Homo sapiens n   | 0.02294435 | 0.0232169  | 1.89097324 |
| CPXM1       | NM_019609.3 | CPXM1        | 20 | Homo sapiens CPX1; CPXM     | 0.02539273 | 0.02528897 | 1.88648652 |
| ZNF292      | XM_943726.1 | ZNF292       | 6  | Homo sapiens BA39312.3; KI  | 0.0246312  | 0.02469876 | 1.88632386 |
| LOC650028   | XM_939119.1 | LOC650028    |    | PREDICTED: Homo sapiens s   | 0.02801824 | 0.02742437 | 1.88298078 |
| SULT6B1     | NM_00103237 | SULT6B1      | 2  | Homo sapiens sulfotransfera | 0.01737102 | 0.01830351 | 1.88131443 |
| GNRH1       | NM_000825.2 | GNRH1        | 8  | Homo sapiens LHRH; LNRH;    | 0.04088599 | 0.03750091 | 1.87978881 |
| DCD         | NM_053283.1 | DCD          | 12 | Homo sapiens MGC71930; D    | 0.02933098 | 0.02846163 | 1.87827962 |
| NIT1        | NM_005600.1 | NIT1         | 1  | Homo sapiens MGC57670       | 0.02799152 | 0.02740433 | 1.87792449 |
|             | Hs.540255   | HS.540255    | 15 | DB299844 BRACE3 Homo sap    | 0.03915389 | 0.036196   | 1.87329577 |
| LOC651617   | XM_940799.1 | LOC651617    |    | PREDICTED: Homo sapiens s   | 0.0492771  | 0.04381408 | 1.87249943 |
| MIR614      | NR_030345.1 | MIR614       |    | Homo sapiens microRNA 614   | 0.00149729 | 0.00226504 | 1.87062951 |
| SPTLC2      | NM_004863.2 | SPTLC2       | 14 | Homo sapiens SPT2; KIAA05   | 0.03277659 | 0.03116067 | 1.86926718 |
| GBP4        | NM_052941.2 | GBP4         | 1  | Homo sapiens Mpa2           | 0.04719944 | 0.04230111 | 1.8691309  |
|             | Hs.224854   | HS.224854    | 12 | UI-H-EU0-azt-h-09-0-UI.s1 N | 0.02875244 | 0.02798379 | 1.86666695 |
| ZNF155      | NM_198089.1 | ZNF155       | 19 | Homo sapiens MGC161655; j   | 0.0527372  | 0.0463133  | 1.86592476 |
| CPT1B       | NM_152247.1 | CPT1B        |    | Homo sapiens CPT1-M; KIAA   | 0.00427874 | 0.0055494  | 1.86555622 |
| C15orf32    | NM_153040.1 | C15ORF32     | 15 | Homo sapiens FLJ32831; MG   | 0.0194376  | 0.02011149 | 1.85852652 |
| LOC400509   | XM_942431.1 | LOC400509    |    | PREDICTED: Homo sapiens s   | 0.05124026 | 0.04523414 | 1.85815099 |
| MGC22014    | XM_942026.1 | MGC22014     |    | PREDICTED: Homo sapiens h   | 0.01352228 | 0.01478068 | 1.85493099 |
|             | Hs.540722   | HS.540722    | 17 | ti70d10.x1 NCI_CGAP_Kid11   | 0.01021662 | 0.01168109 | 1.85406207 |
| LOC647920   | XM_943115.1 | LOC647920    |    | PREDICTED: Homo sapiens h   | 0.04213908 | 0.03847729 | 1.85064714 |
| WDFY3       | NM_178583.1 | WDFY3        | 4  | Homo sapiens ALFY; KIAA09   | 0.01818589 | 0.01900012 | 1.84411604 |

5.0 Upreg

|             |             |              |                                 |            |            |            |
|-------------|-------------|--------------|---------------------------------|------------|------------|------------|
| FLJ25169    | NM_152568.1 | FLJ25169     | 8 Homo sapiens hypothetical p   | 0.03984502 | 0.03671885 | 1.83927664 |
| FBXW2       | NM_012164.2 | FBXW2        | 9 Homo sapiens FBW2; Fwd2;      | 0.00055021 | 0.00097645 | 1.83661898 |
| PIK3R4      | NM_014602.1 | PIK3R4       | 3 Homo sapiens MGC102700; i     | 0.04560075 | 0.04115842 | 1.83549627 |
| KDM6B       | NM_00108042 | KDM6B        | 17 Homo sapiens KIAA0346        | 0.04718088 | 0.04228879 | 1.8353512  |
| GEN1        | NM_182625.2 | GEN1         | 2 Homo sapiens FLJ40869; DK     | 0.01550153 | 0.01658866 | 1.83290452 |
| P76         | NM_173542.2 | P76          | 12 Homo sapiens mannose-6-ph    | 0.02718795 | 0.02675194 | 1.82944999 |
|             | Hs.171169   | HS.171169    | 8 AGENCOURT_13640441 NIH        | 0.02964106 | 0.0287244  | 1.82941974 |
| LOC283514   | NM_198849.1 | LOC283514    | 13 Homo sapiens similar to seve | 0.05603399 | 0.04880308 | 1.82721749 |
| CD2         | NM_001767.2 | CD2          | 1 Homo sapiens SRBC; T11        | 0.03636319 | 0.03402118 | 1.82673823 |
|             | Hs.545589   | HS.545589    | Human small nuclear RNA U6      | 0.0373925  | 0.03484301 | 1.82606229 |
|             | Hs.540335   | HS.540335    | 15 UI-H-ED1-axx-k-12-0-UI.s1 I  | 0.00199704 | 0.00289    | 1.82104365 |
| CHTF8       | NM_00100284 | CHTF8        | 16 Homo sapiens FLJ20400; DEI   | 0.01990303 | 0.0205277  | 1.81962574 |
| ZNF519      | XM_940357.1 | ZNF519       | PREDICTED: Homo sapiens z       | 0.04562427 | 0.04116694 | 1.81890116 |
| TRIM60      | NM_152620.2 | TRIM60       | 4 Homo sapiens RNF33; RNF12     | 0.00644199 | 0.00789414 | 1.81727515 |
| CEP170      | NM_014812.1 | CEP170       | 1 Homo sapiens FAM68A; KAB;     | 0.02448263 | 0.02456663 | 1.81585023 |
| CORO2B      | NM_006091.1 | CORO2B       | 15 Homo sapiens KIAA0925; CL    | 0.0362308  | 0.03392264 | 1.8058752  |
| CYP2C18     | NM_000772.1 | CYP2C18      | 10 Homo sapiens CYP2C17; DKF    | 0.03473916 | 0.03273562 | 1.80573199 |
| MUC6        | XM_939286.1 | MUC6         | 11 Homo sapiens MUC6 mucin      | 0.00415104 | 0.00541822 | 1.8020731  |
| MED23       | NM_015979.2 | MED23        | 6 Homo sapiens MED23; DKFZ      | 0.00086001 | 0.00141412 | 1.79914697 |
| EPB41L1     | NM_177996.1 | EPB41L1      | 20 Homo sapiens KIAA0338; 4.1   | 0.01747274 | 0.01839302 | 1.79886778 |
|             | Hs.401073   | HS.401073    | 5 UI-H-FL1-bgw-g-15-0-UI.s1 I   | 0.02730782 | 0.02684581 | 1.79519641 |
| ACVR1C      | NM_145259.1 | ACVR1C       | 2 Homo sapiens ACVRLK7; ALK     | 0.02905351 | 0.02823922 | 1.78724616 |
| SIL1        | NM_00103763 | SIL1         | 5 Homo sapiens MSS; BAP; UL     | 3.193E-06  | 1.5909E-05 | 1.78590075 |
| TRAPPC6A    | NM_024108.1 | TRAPPC6A     | 19 Homo sapiens MGC2650; TR     | 0.00143708 | 0.00218943 | 1.78284679 |
| LOC131691   | XM_00172197 | LOC131691    | PREDICTED: Homo sapiens s       | 0.02592155 | 0.02570185 | 1.78172206 |
| DDX49       | NM_019070.3 | DDX49        | 19 Homo sapiens FLJ10432; R2    | 0.00153734 | 0.00231485 | 1.77165307 |
| OR8J3       | NM_00100406 | OR8J3        | 11 Homo sapiens OR11-173        | 0.00331319 | 0.00445379 | 1.76681058 |
| SPG20       | NM_015087.3 | SPG20        | 13 Homo sapiens TAHCCP1; KIA    | 0.03703608 | 0.03455493 | 1.76508119 |
| LYRM5       | NM_00100166 | LYRM5        | 12 Homo sapiens LYR motif cont  | 0.00026549 | 0.00053109 | 1.76200918 |
| WDFY4       | NM_020945.1 | WDFY4        | 10 Homo sapiens WDFY family r   | 0.0384725  | 0.03569018 | 1.75826248 |
| LOC654069   | XM_945683.1 | LOC654069    | PREDICTED: Homo sapiens s       | 0.00100642 | 0.00161639 | 1.75546061 |
| C6          | NM_000065.1 | C6           | 5 Homo sapiens complement c     | 0.05263242 | 0.04623517 | 1.75476199 |
| CLEC4E      | NM_014358.1 | CLEC4E       | 12 Homo sapiens CLECSF9; MIN    | 0.03441041 | 0.03247117 | 1.7537305  |
| LOC652353   | XM_941781.1 | LOC652353    | PREDICTED: Homo sapiens s       | 0.05536544 | 0.04830712 | 1.75258786 |
| TBC1D13     | NM_018201.2 | TBC1D13      | 9 Homo sapiens RP11-545E17.     | 0.00968297 | 0.01116845 | 1.74843295 |
| AMDHD2      | NM_015944.2 | AMDHD2       | 16 Homo sapiens CGI-14          | 0.00282364 | 0.00387225 | 1.7465431  |
| CA4         | NM_000717.2 | CA4          | 17 Homo sapiens Car4; CAIV; R   | 0.03341735 | 0.0316669  | 1.73713059 |
| ZNF75D      | NM_007131.2 | ZNF75D       | Homo sapiens MGC126327; ;       | 0.02679427 | 0.0264387  | 1.73413913 |
| LOC10013023 | XR_038429.1 | LOC100130233 | PREDICTED: Homo sapiens n       | 0.02691553 | 0.02653149 | 1.73121745 |
| TBKBP1      | NM_014726.1 | TBKBP1       | 17 Homo sapiens ProSAPiP2; KI   | 0.02172951 | 0.02212798 | 1.73035614 |
|             | Hs.445277   | HS.445277    | 2 UI-H-EZ1-bcb-b-23-0-UI.s1 I   | 0.04967211 | 0.04407596 | 1.72240388 |
| DGCR11      | NR_024157.1 | DGCR11       | 22 Homo sapiens DiGeorge sync   | 0.02872314 | 0.02796458 | 1.71745349 |
| KIAA0527    | XM_940465.1 | KIAA0527     | PREDICTED: Homo sapiens K       | 0.00882646 | 0.01032716 | 1.71376665 |
| LOC647876   | XM_943078.1 | LOC647876    | PREDICTED: Homo sapiens h       | 0.04167068 | 0.03810511 | 1.71241901 |
| LOC727732   | NM_031862.1 | LOC727732    | 17 PREDICTED: Homo sapiens s    | 0.04883018 | 0.04350046 | 1.70859636 |
| MLLT1       | NM_005934.2 | MLLT1        | 19 Homo sapiens ENL; YEATS1;    | 0.04503998 | 0.04070672 | 1.70858005 |
|             | Hs.550285   | HS.550285    | 12 7i71a09.y1 NCI_CGAP_Brn2     | 0.03863532 | 0.03579581 | 1.70402548 |
| UBE2S       | NM_014501.2 | UBE2S        | 19 Homo sapiens E2EPF; E2-EPF   | 0.04517082 | 0.04080395 | 1.69004552 |
| USP14       | NM_00103733 | USP14        | 18 Homo sapiens TGT             | 0.00105842 | 0.00168939 | 1.68613425 |
| FBXW5       | NM_178226.1 | FBXW5        | 9 Homo sapiens RP11-229P13.     | 0.0274276  | 0.02694545 | 1.67927565 |
| YJEFN3      | NM_198537.1 | YJEFN3       | 19 Homo sapiens MGC138490       | 0.04562448 | 0.0411629  | 1.67867055 |
| EFCAB4A     | NM_173584.2 | EFCAB4A      | 11 Homo sapiens MGC45840; FL    | 0.04587419 | 0.04132445 | 1.678475   |
| LOC646048   | XR_017059.2 | LOC646048    | 19 PREDICTED: Homo sapiens s    | 0.04016633 | 0.03694898 | 1.67114252 |
| HINFP       | NM_015517.3 | HINFP        | 11 Homo sapiens ZNF743; HINF    | 0.00195442 | 0.00284002 | 1.66698561 |
| LOC10012947 | XM_00172325 | LOC100129478 | PREDICTED: Homo sapiens h       | 0.02807265 | 0.0274715  | 1.66593168 |
| REV3L       | NM_002912.1 | REV3L        | 6 Homo sapiens POLZ; REV3       | 0.02781776 | 0.02726464 | 1.66426596 |
| INPP5K      | NM_130766.2 | INPP5K       | 17 Homo sapiens inositol polyph | 0.0283302  | 0.02764952 | 1.66348376 |
| SPNS3       | NM_182538.3 | SPNS3        | 17 Homo sapiens MGC29671        | 0.05018784 | 0.04444817 | 1.6620928  |
| LOC10013432 | XM_00171382 | LOC100134329 | PREDICTED: Homo sapiens h       | 0.04817389 | 0.04303815 | 1.65800009 |
| ZFAND3      | NM_021943.1 | ZFAND3       | 6 Homo sapiens FLJ13222; TE     | 0.00241603 | 0.00340151 | 1.65604744 |
| DKFZP434L18 | XM_496054.2 | DKFZP434L18  | 15 PREDICTED: Homo sapiens C    | 0.04611615 | 0.0414913  | 1.65263614 |
| FLJ39739    | XM_936515.1 | FLJ39739     | PREDICTED: Homo sapiens F       | 0.01058991 | 0.01205291 | 1.65066422 |
| TRAPPC6B    | NM_00107953 | TRAPPC6B     | 14 Homo sapiens trafficking pro | 8.1181E-06 | 3.2244E-05 | 1.64730997 |
|             | Hs.566740   | HS.566740    | UI-H-BW1-anr-b-09-0-UI.s1       | 0.03878766 | 0.03591041 | 1.64464648 |
| PGAP3       | NM_033419.3 | PGAP3        | 17 Homo sapiens CAB2; AGLA5     | 0.03589705 | 0.03366403 | 1.63967203 |
| BLCAP       | NM_006698.2 | BLCAP        | 20 Homo sapiens CB10            | 5.4322E-05 | 0.00014611 | 1.63330773 |
| LOC642856   | XM_926250.1 | LOC642856    | PREDICTED: Homo sapiens h       | 0.04375424 | 0.03972061 | 1.62413966 |
| SLC35A2     | NM_00103228 | SLC35A2      | Homo sapiens UGALT; UGT2;       | 2.007E-05  | 6.6127E-05 | 1.61809652 |
| AGER        | NM_001136.3 | AGER         | 6 Homo sapiens MGC22357; R      | 0.02146237 | 0.02191189 | 1.61628244 |
| LOC10012953 | XR_037837.1 | LOC100129539 | PREDICTED: Homo sapiens n       | 0.02031966 | 0.020896   | 1.61450014 |

## 5.0 Upreg

|             |             |             |                                  |            |            |            |
|-------------|-------------|-------------|----------------------------------|------------|------------|------------|
| LOC730262   | XM_371302.3 | LOC730262   | 1 PREDICTED: Homo sapiens s      | 0.00440553 | 0.00568526 | 1.60755197 |
| CCDC40      | XM_934511.1 | CCDC40      | 17 PREDICTED: Homo sapiens c     | 0.02241805 | 0.02274467 | 1.60161433 |
| LAMA2       | NM_000426.3 | LAMA2       | 6 Homo sapiens LAMM              | 0.02496745 | 0.02495607 | 1.59667485 |
| UNKL        | NM_00103712 | UNKL        | 16 Homo sapiens MGC5179; ZC      | 0.05072596 | 0.04483876 | 1.59437981 |
| LOC644624   | XM_934133.1 | LOC644624   | 4 PREDICTED: Homo sapiens h      | 0.00256819 | 0.00357501 | 1.59096221 |
| CCDC71      | NM_022903.2 | CCDC71      | 3 Homo sapiens FLJ13629; FLJ     | 0.00439008 | 0.005667   | 1.59025374 |
| RNU6ATAC    | NR_023344.1 | RNU6ATAC    | 9 Homo sapiens RNA, U6atac s     | 0.02670162 | 0.02636507 | 1.58813161 |
| IL2RA       | NM_000417.1 | IL2RA       | 10 Homo sapiens CD25; IL2R; I    | 0.05707241 | 0.0495305  | 1.58627632 |
|             | Hs.580000   | HS.580000   | 2 ho33b03.x1 NCI_CGAP_Lu24       | 0.04949363 | 0.0439576  | 1.58187643 |
|             | Hs.534809   | HS.534809   | 7 TC121268 Human fetal brain     | 0.04680003 | 0.04199033 | 1.58074253 |
| ARHGAP23    | XM_930977.1 | ARHGAP23    | 17 PREDICTED: Homo sapiens R     | 0.0047312  | 0.00605301 | 1.57899684 |
| PATE2       | NM_212555.1 | PATE2       | 11 Homo sapiens UNQ3112          | 0.00460359 | 0.0059113  | 1.57759702 |
| GCDH        | NM_013976.2 | GCDH        | 19 Homo sapiens GCD; ACAD5       | 0.00574161 | 0.00715479 | 1.57439259 |
| KLHL18      | NM_025010.2 | KLHL18      | 3 Homo sapiens FLJ13703; KIA     | 0.00507364 | 0.00643111 | 1.57236817 |
| VAC14       | NM_018052.3 | VAC14       | PREDICTED: Homo sapiens V        | 0.01843866 | 0.01921159 | 1.57193786 |
| LOC642602   | XM_926081.1 | LOC642602   | 8 PREDICTED: Homo sapiens s      | 0.04665646 | 0.04189151 | 1.56785625 |
| ALOX15      | NM_001140.3 | ALOX15      | 17 Homo sapiens 15-LOX2          | 0.00494673 | 0.00628932 | 1.56566842 |
| FCAMR       | NM_032029.2 | FCAMR       | Homo sapiens FCA/MR; FKSC        | 0.02652811 | 0.02623804 | 1.56236774 |
| TAS1R2      | NM_152232.1 | TAS1R2      | 1 Homo sapiens T1R2; GPR71;      | 0.04825829 | 0.04310039 | 1.56102972 |
| NSUN5B      | NM_148980.1 | NSUN5B      | 7 Homo sapiens WBCSR20B; G       | 9.0121E-06 | 3.4957E-05 | 1.55908775 |
| CD200R1     | NM_138940.2 | CD200R1     | 3 Homo sapiens HCRTR2; CD20      | 0.04282695 | 0.03899176 | 1.55635985 |
| SCARNA14    | NR_004388.1 | SCARNA14    | 15 Homo sapiens U100             | 4.5643E-05 | 0.00012693 | 1.55237521 |
| JAGN1       | NM_032492.3 | JAGN1       | 3 Homo sapiens jagunal homol     | 0.02449414 | 0.02457536 | 1.55110378 |
| OPN5        | NM_181744.2 | OPN5        | 6 Homo sapiens PGR12; TMEM       | 0.04870712 | 0.0434261  | 1.5485414  |
| AYP1p1      | XR_001434.1 | AYP1P1      | PREDICTED: Homo sapiens A        | 0.00123088 | 0.00192063 | 1.54805442 |
| LOC728452   | XM_932756.1 | LOC728452   | 5 PREDICTED: Homo sapiens s      | 0.04202297 | 0.03839125 | 1.54365736 |
|             | Hs.576292   | HS.576292   | 1 602658226F2 NCI_CGAP_Sk        | 0.03670206 | 0.03427974 | 1.54254998 |
| FUBP1       | NM_003902.3 | FUBP1       | 1 Homo sapiens FBP; FUBP         | 0.03349159 | 0.03172355 | 1.53881777 |
| LOC440225   | XR_042392.1 | LOC440225   | PREDICTED: Homo sapiens n        | 0.00415681 | 0.00542171 | 1.53643979 |
| RAB15       | NM_198686.1 | RAB15       | 14 Homo sapiens RAB15, memb      | 0.02272957 | 0.02302081 | 1.5359365  |
| LOC641772   | XM_935895.1 | LOC641772   | PREDICTED: Homo sapiens h        | 0.05128761 | 0.04526682 | 1.53347607 |
|             | Hs.560357   | HS.560357   | te46f04.x1 Soares_NhHMPu         | 0.04965741 | 0.04406737 | 1.53345098 |
| AFF1        | NM_005935.1 | AFF1        | 4 Homo sapiens MLLT2; MGC1       | 0.04965218 | 0.04406719 | 1.53287097 |
| GTF2E1      | NM_005513.1 | GTF2E1      | 3 Homo sapiens TFIIE-A; FE       | 0.00026887 | 0.00053566 | 1.5323097  |
| SLC48A1     | NM_017842.2 | SLC48A1     | 12 Homo sapiens solute carrier f | 0.01207061 | 0.01344516 | 1.52692385 |
| KRT23       | NM_015515.3 | KRT23       | 17 Homo sapiens MGC26158; Cl     | 0.02116478 | 0.0216408  | 1.52418451 |
| TBC1D3G     | NM_00104028 | TBC1D3G     | 17 Homo sapiens TBC1 domain i    | 0.00405408 | 0.00531299 | 1.52028098 |
| LOC642897   | NM_182749.1 | LOC642897   | 11 PREDICTED: Homo sapiens n     | 0.00121055 | 0.00189396 | 1.51594157 |
| SSSCA1      | NM_006396.1 | SSSCA1      | 11 Homo sapiens p27              | 0.02976926 | 0.02882316 | 1.51074952 |
| LOC339240   | NR_001443.1 | LOC339240   | 17 Homo sapiens keratin pseudc   | 0.04420828 | 0.04007474 | 1.50643393 |
| LOC390387   | XR_000589.1 | LOC390387   | 13 PREDICTED: Homo sapiens s     | 0.025426   | 0.02531061 | 1.5048964  |
| LOC10013463 | XM_00172640 | LOC10013463 | 7 PREDICTED: Homo sapiens h      | 0.00403748 | 0.00529282 | 1.50178392 |
| LGALS8      | NM_201544.1 | LGALS8      | 1 Homo sapiens Gal-8; PCTA-1     | 0.0539404  | 0.04727531 | 1.50045802 |
| ELOVL1      | NM_022821.2 | ELOVL1      | 1 Homo sapiens CGI-88; Ssc1      | 0.0023843  | 0.00336495 | 1.49777161 |
| LOC10013113 | XR_037336.1 | LOC10013113 | PREDICTED: Homo sapiens n        | 0.02469849 | 0.02474926 | 1.49490604 |
| FAM21B      | XM_932746.1 | FAM21B      | 10 PREDICTED: Homo sapiens fi    | 0.02872666 | 0.02796491 | 1.49448764 |
| SC5DL       | NM_006918.3 | SC5DL       | 11 Homo sapiens ERG3; SC5D;      | 1.15E-05   | 4.2483E-05 | 1.4937828  |
| TRIM13      | NM_213590.1 | TRIM13      | 13 Homo sapiens RNF77; CAR; I    | 0.00118409 | 0.0018582  | 1.48878558 |
| MIR761      | NR_031580.1 | MIR761      | Homo sapiens microRNA 761        | 0.01799472 | 0.01882504 | 1.48868918 |
| TBCC        | NM_003192.1 | TBCC        | 6 Homo sapiens CFC               | 0.01519071 | 0.01630975 | 1.48558297 |
| RABGEF1     | NM_014504.1 | RABGEF1     | 7 Homo sapiens rabex-5; FLJ3     | 0.03561148 | 0.03344986 | 1.48320997 |
| LOC728686   | XR_038523.1 | LOC728686   | PREDICTED: Homo sapiens n        | 0.00431325 | 0.00558425 | 1.48146637 |
| NBPF3       | XM_939326.1 | NBPF3       | PREDICTED: Homo sapiens n        | 0.01114977 | 0.01257592 | 1.48133734 |
| TAF7        | NM_005642.2 | TAF7        | 5 Homo sapiens TAFII55; TAF2     | 6.2691E-05 | 0.00016322 | 1.48089101 |
| CD55        | NM_000574.2 | CD55        | 1 Homo sapiens CR; TC; DAF       | 0.0095454  | 0.01103879 | 1.48026196 |
| DNAJB9      | NM_012328.1 | DNAJB9      | 7 Homo sapiens MSTP049; MD       | 0.00085388 | 0.00140562 | 1.47774779 |
|             | Hs.159057   | HS.159057   | 22 Homo sapiens hypothetical p   | 0.03845232 | 0.03567523 | 1.47456609 |
| UBAP2       | NM_018449.2 | UBAP2       | 9 Homo sapiens FLJ22435; KIA     | 0.00031717 | 0.0006154  | 1.47364217 |
| DNAL1       | NM_031427.1 | DNAL1       | 14 Homo sapiens C14orf168; M     | 0.02703285 | 0.02662322 | 1.47224637 |
| ZNF136      | XM_936978.1 | ZNF136      | PREDICTED: Homo sapiens z        | 0.05542295 | 0.04833326 | 1.47154592 |
| HDAC6       | NM_006044.2 | HDAC6       | Homo sapiens FLJ16239; JM        | 0.00233178 | 0.00330304 | 1.47126173 |
| PGM5P2      | NR_002836.1 | PGM5P2      | 9 Homo sapiens phosphoglucor     | 0.03577004 | 0.03357004 | 1.46959175 |
| FAM63A      | NM_018379.2 | FAM63A      | 1 Homo sapiens RP11-316M1.5      | 0.00764763 | 0.00912557 | 1.46922375 |
| LOC653557   | XM_00172590 | LOC653557   | 16 PREDICTED: Homo sapiens h     | 0.0080092  | 0.0094976  | 1.46602472 |
| TARBP2      | NM_134324.2 | TARBP2      | 12 Homo sapiens TRBP1; TRBP;     | 0.00026577 | 0.00053118 | 1.45991209 |
| POLR3B      | NM_018082.3 | POLR3B      | 12 Homo sapiens RPC2; FLJ103     | 0.00052617 | 0.00093967 | 1.45479005 |
| DOLK        | NM_014908.3 | DOLK        | 9 Homo sapiens SEC59; DK; K      | 0.01156312 | 0.01296547 | 1.45054116 |
| CTNND1      | XM_943087.1 | CTNND1      | PREDICTED: Homo sapiens c        | 0.04052407 | 0.03720395 | 1.44791033 |
| LOC643558   | XM_932319.1 | LOC643558   | 7 PREDICTED: Homo sapiens s      | 0.00656465 | 0.00802092 | 1.4441617  |
| ABCC6       | NM_00107952 | ABCC6       | 16 Homo sapiens MOATE; EST3      | 0.00209289 | 0.00301329 | 1.4441585  |



5.0 Upreg

|             |             |             |                                 |            |            |            |
|-------------|-------------|-------------|---------------------------------|------------|------------|------------|
| LOC642335   | XM_943378.1 | LOC642335   | PREDICTED: Homo sapiens h       | 0.04751005 | 0.04254038 | 1.44148312 |
| ZNF513      | NM_144631.4 | ZNF513      | 2 Homo sapiens FLJ32203; HM     | 0.03274707 | 0.03114272 | 1.44134611 |
| LOC399753   | XM_930593.1 | LOC399753   | 10 PREDICTED: Homo sapiens h    | 0.04246192 | 0.03872775 | 1.4411751  |
| LOC440261   | XM_496059.2 | LOC440261   | 15 PREDICTED: Homo sapiens h    | 0.02515172 | 0.02510023 | 1.44085588 |
| BIRC6       | NM_016252.2 | BIRC6       | 2 Homo sapiens FLJ13726; KIA    | 0.00825791 | 0.00975692 | 1.44018242 |
| CD59        | NM_203329.1 | CD59        | 11 Homo sapiens MIN2; PROTEC    | 0.03035324 | 0.02929806 | 1.43958466 |
| C12orf76    | NM_207435.1 | C12ORF76    | 12 Homo sapiens FLJ11385        | 0.00288592 | 0.00394839 | 1.43547261 |
| PC          | NM_000920.2 | PC          | 11 Homo sapiens PCB             | 0.0491416  | 0.04372018 | 1.41269675 |
| PBX4        | NM_025245.1 | PBX4        | 19 Homo sapiens pre-B-cell leuk | 0.00202596 | 0.00292798 | 1.41111531 |
| HPS5        | NM_181507.1 | HPS5        | 11 Homo sapiens KIAA1017; AII   | 0.03798091 | 0.03529011 | 1.41072316 |
| LIN52       | NM_00102467 | LIN52       | 14 Homo sapiens C14orf46; c14   | 0.0522497  | 0.04596339 | 1.40547516 |
| RALGAPA1    | NM_194301.2 | RALGAPA1    | 14 Homo sapiens TULIP1; GRIP1   | 0.00083795 | 0.00138407 | 1.40484245 |
| RNF31       | NM_017999.3 | RNF31       | 14 Homo sapiens FLJ23501; MG    | 2.127E-05  | 6.9172E-05 | 1.40143884 |
| ADORA3      | NM_000677.2 | ADORA3      | 1 Homo sapiens AD026; RP11-     | 0.0418502  | 0.03825333 | 1.40134131 |
| CYP4V2      | NM_207352.2 | CYP4V2      | 4 Homo sapiens BCD; MGC435      | 0.01477043 | 0.01591889 | 1.40076628 |
| HIST1H2BK   | NM_080593.1 | HIST1H2BK   | 6 Homo sapiens MGC131989; I     | 1.0431E-07 | 1.4234E-06 | 1.40024646 |
| FXR2        | NM_004860.2 | FXR2        | 17 Homo sapiens FMR1L2          | 0.00791583 | 0.00940085 | 1.39951118 |
| FAAH        | NM_001441.1 | FAAH        | 1 Homo sapiens FAAH-1; MGC1     | 0.03158227 | 0.03025471 | 1.39943362 |
| ZNF533      | NM_152520.3 | ZNF533      | 2 Homo sapiens FLJ25270         | 0.01234377 | 0.01369034 | 1.39840182 |
| PRDM1       | NM_182907.1 | PRDM1       | 6 Homo sapiens MGC118922; I     | 0.01308907 | 0.0143842  | 1.39820502 |
| UPRT        | NM_145052.1 | UPRT        | X Homo sapiens RP11-311P8.3     | 0.0363225  | 0.03398673 | 1.39688135 |
| WHSC1L1     | NM_017778.2 | WHSC1L1     | 8 Homo sapiens pp14328; DKF     | 0.01211529 | 0.01348466 | 1.3930027  |
| FAM153B     | NM_00107952 | FAM153B     | 5 Homo sapiens DKFZp434D11      | 0.01951784 | 0.02017549 | 1.39280428 |
| LOC10013274 | XM_00172210 | LOC10013274 | 7 PREDICTED: Homo sapiens h     | 0.01549586 | 0.01658462 | 1.38267523 |
| MBTD1       | NM_017643.1 | MBTD1       | 17 Homo sapiens SAA49P01; FLJ   | 0.01245349 | 0.01378936 | 1.37951715 |
| SLC35C1     | NM_018389.3 | SLC35C1     | 11 Homo sapiens FLJ14841; FU    | 0.00011319 | 0.0002642  | 1.37542824 |
| NFKB2       | NM_00107749 | NFKB2       | 10 Homo sapiens LYT10; LYT-10   | 0.01040395 | 0.01187052 | 1.37278006 |
|             |             |             | FNPANH10 FNP Homo sapien        | 0.03887484 | 0.03596835 | 1.36711809 |
| PSG3        | NM_021016.2 | PSG3        | 19 Homo sapiens pregnancy spe   | 0.04241913 | 0.03869676 | 1.36302617 |
| STAG3L3     | NM_00101373 | STAG3L3     | 7 Homo sapiens stromal antige   | 0.00187057 | 0.00273585 | 1.36286165 |
| PTPRA       | NM_002836.2 | PTPRA       | 20 Homo sapiens HPTPalpha; RF   | 0.00024873 | 0.00050307 | 1.36210198 |
| LOC678655   | NR_015382.1 | LOC678655   | 12 Homo sapiens hypothetical lc | 0.05252098 | 0.04615576 | 1.361678   |
| PTPRK       | NM_002844.2 | PTPRK       | 6 Homo sapiens DKFZp779N10      | 0.0002901  | 0.00057122 | 1.36072459 |
| STYXL1      | NM_016086.2 | STYXL1      | 7 Homo sapiens MK-STYX; DU      | 4.1356E-05 | 0.00011709 | 1.35999637 |
| SLC35C2     | NM_173073.2 | SLC35C2     | 20 Homo sapiens FLJ37039; BA    | 0.0298171  | 0.02885674 | 1.359662   |
| CIR1        | NM_004882.3 | CIR1        | 2 Homo sapiens corepressor in   | 0.02364152 | 0.02381524 | 1.35942825 |
| ATG4B       | NM_013325.4 | ATG4B       | 2 Homo sapiens AULT1; MGC1      | 0.00020869 | 0.00043493 | 1.35815459 |
| CD46        | NM_172358.1 | CD46        | 1 Homo sapiens TLX; MCP; TR     | 0.00016636 | 0.00036157 | 1.35508152 |
| IMMP2L      | NM_032549.1 | IMMP2L      | 7 Homo sapiens IMP2             | 0.00116533 | 0.00183368 | 1.35392919 |
| CENTG3      | NM_031946.3 | CENTG3      | 7 Homo sapiens MRIP-1; AGAP     | 0.00293357 | 0.00400609 | 1.35367088 |
| TTC32       | NM_00100823 | TTC32       | 2 Homo sapiens tetratricopepti  | 0.01530648 | 0.01641597 | 1.35342867 |
| UNC5A       | NM_133369.2 | UNC5A       | 5 Homo sapiens UNC5H1; FLJ1     | 0.00043616 | 0.0008038  | 1.35256671 |
| LOC729021   | NM_198284.1 | LOC729021   | 4 PREDICTED: Homo sapiens h     | 0.00075773 | 0.00127216 | 1.35144991 |
| EMILIN2     | NM_032048.2 | EMILIN2     | 18 Homo sapiens FLJ33200; FO    | 0.00079071 | 0.00131945 | 1.34583327 |
| SPINLW1     | NM_181502.1 | SPINLW1     | 20 Homo sapiens EPPIN; dJ461F   | 0.01137108 | 0.012791   | 1.34433819 |
| LOC791120   | NR_015357.1 | LOC791120   | Homo sapiens MGC149135          | 0.00069992 | 0.00118784 | 1.34215016 |
| CASP3       | NM_032991.2 | CASP3       | 4 Homo sapiens CPP32B; SCA-     | 0.00058736 | 0.00102987 | 1.33971971 |
| CYorf14     | NR_001544.1 | CYORF14     | Y Homo sapiens PRO2834          | 0.03837929 | 0.03561501 | 1.33908275 |
| LRTC2       | NM_181715.1 | LRTC2       | 1 Homo sapiens RP11-422P24.     | 0.03623059 | 0.03392606 | 1.33795155 |
| LPCAT1      | NM_024830.3 | LPCAT1      | 5 Homo sapiens FLJ12443; PF     | 0.01139842 | 0.01281847 | 1.33641466 |
| PLA2G2D     | NM_012400.2 | PLA2G2D     | 1 Homo sapiens SPLASH; sPLA     | 0.03278398 | 0.03116094 | 1.33578169 |
| SELO        | NM_031454.1 | SELO        | 22 Homo sapiens MGC131879       | 0.01663158 | 0.01761535 | 1.33423376 |
| TMEM63B     | NM_018426.1 | TMEM63B     | 6 Homo sapiens DKFZp686N22      | 0.0006809  | 0.00116162 | 1.3340739  |
| SIN3B       | NM_015260.1 | SIN3B       | 19 Homo sapiens KIAA0700        | 0.00635083 | 0.00779877 | 1.33389346 |
| ABCB9       | NM_203444.1 | ABCB9       | 12 Homo sapiens TAPL; KIAA15    | 8.1537E-05 | 0.00020295 | 1.33079739 |
| RNMT        | NM_003799.1 | RNMT        | 18 Homo sapiens RG7MT1; KIA     | 0.00014419 | 0.00032135 | 1.3296692  |
| WASH2P      | NR_024077.2 | WASH2P      | 2 Homo sapiens WAS protein f    | 0.01136494 | 0.01278901 | 1.3248881  |
| IRX1        | NM_024337.3 | IRX1        | 5 Homo sapiens IRX-5            | 0.0310762  | 0.02983179 | 1.32465454 |
| PPOX        | NM_000309.2 | PPOX        | 1 Homo sapiens MGC8485; VP      | 0.00034366 | 0.0006585  | 1.32429249 |
| MLL         | NM_005933.2 | MLL         | 11 Homo sapiens TRX1; HRX; C    | 0.0435591  | 0.03956803 | 1.32239149 |
| FAM107B     | NM_031453.2 | FAM107B     | 10 Homo sapiens FLJ45505; C1    | 0.00084229 | 0.00138967 | 1.32097328 |
| TMEM115     | NM_007024.4 | TMEM115     | 3 Homo sapiens PL6              | 9.9689E-05 | 0.00023931 | 1.320784   |
| RSPH3       | NM_031924.3 | RSPH3       | 6 Homo sapiens dJ111C20.1; F    | 0.0008113  | 0.00134868 | 1.32073649 |
| APAF1       | NM_181869.1 | APAF1       | 12 Homo sapiens CED4; DKFZp     | 0.00517652 | 0.00653979 | 1.31454524 |
| RIPK1       | NM_003804.3 | RIPK1       | 6 Homo sapiens RIP; FLJ39204    | 0.02915724 | 0.02832123 | 1.30878841 |
| LOC147727   | NR_024333.1 | LOC147727   | 19 Homo sapiens hypothetical L  | 0.03528434 | 0.03318877 | 1.30853736 |
| EDEM1       | NM_014674.1 | EDEM1       | 3 Homo sapiens KIAA0212; ED     | 0.03397965 | 0.03211304 | 1.30701328 |
| GATAD2B     | NM_020699.1 | GATAD2B     | 1 Homo sapiens MGC138285; I     | 0.0009924  | 0.00159708 | 1.30646265 |
| CTDP1       | NM_004715.3 | CTDP1       | 18 Homo sapiens CCFDN; FCP1     | 0.05018924 | 0.04444493 | 1.30581489 |
| DLK2        | NM_023932.2 | DLK2        | 6 Homo sapiens MGC2487; EG      | 0.02168521 | 0.0220957  | 1.3038177  |

5.0 Upreg

|             |             |              |    |              |                             |            |            |            |
|-------------|-------------|--------------|----|--------------|-----------------------------|------------|------------|------------|
| OSBPL2      | NM_144498.1 | OSBPL2       | 20 | Homo sapiens | MGC4307; KIA                | 0.00169218 | 0.00251094 | 1.30378044 |
| PICK1       | NM_012407.3 | PICK1        | 22 | Homo sapiens | MGC15204; PI                | 0.00042145 | 0.00078211 | 1.30330339 |
| C4orf41     | NM_199053.1 | C4ORF41      | 4  | Homo sapiens | FLJ12716                    | 0.02270208 | 0.02299827 | 1.30309392 |
| FAM76B      | NM_144664.3 | FAM76B       | 11 | Homo sapiens | MGC33371                    | 0.0339528  | 0.03209458 | 1.29982457 |
| NCOA3       | NM_006534.2 | NCOA3        | 20 | Homo sapiens | CAGH16; TNR                 | 0.00758142 | 0.00905642 | 1.29463274 |
| LOC10013424 | XM_00171742 | LOC100134241 |    |              | PREDICTED: Homo sapiens h   | 0.0395425  | 0.03650525 | 1.29340086 |
| LSM8        | NM_016200.2 | LSM8         | 7  | Homo sapiens | YJR022W                     | 0.01323597 | 0.014522   | 1.29312624 |
| C9orf130    | XM_939697.1 | C9ORF130     |    |              | PREDICTED: Homo sapiens c   | 0.00026111 | 0.0005245  | 1.29192375 |
| ZNF302      | XM_927060.1 | ZNF302       | 19 | Homo sapiens | HSD16; ZNF3                 | 0.00894835 | 0.01045304 | 1.29012138 |
| RAB11FIP2   | NM_014904.1 | RAB11FIP2    | 10 | Homo sapiens | Rab11-FIP2; K               | 0.00030079 | 0.00058975 | 1.28841645 |
| IFNAR1      | NM_000629.2 | IFNAR1       | 21 | Homo sapiens | IFNBR; IFN- $\alpha$        | 0.04225624 | 0.03856821 | 1.28778849 |
| TUBD1       | NM_016261.2 | TUBD1        | 17 | Homo sapiens | FLJ12709; TUI               | 0.02915094 | 0.02831824 | 1.28334987 |
| MCAT        | NM_173467.3 | MCAT         | 22 | Homo sapiens | MCT; MT; FAS                | 0.00156953 | 0.00235442 | 1.27830511 |
| C14orf102   | NM_199043.1 | C14ORF102    | 14 | Homo sapiens | FLJ14051; FLJ               | 0.00066502 | 0.00113851 | 1.27699495 |
| RPS4Y2      | NM_00103956 | RPS4Y2       |    |              | Homo sapiens RPS4Y2P        | 0.02459489 | 0.02466799 | 1.27569441 |
| CDC42SE1    | NM_00103870 | CDC42SE1     | 1  | Homo sapiens | SCIP1; SPEC1                | 0.0006456  | 0.00111112 | 1.27100483 |
| LOC10013083 | XR_038851.1 | LOC10013083  | 11 |              | PREDICTED: Homo sapiens n   | 0.01238735 | 0.01372999 | 1.2683503  |
| ABCA7       | NM_019112.2 | ABCA7        | 19 | Homo sapiens | ABCA-SSN; AE                | 0.00652186 | 0.00797975 | 1.26820978 |
| VPS33B      | NM_018668.2 | VPS33B       | 15 | Homo sapiens | FLJ14848                    | 0.0002066  | 0.0004314  | 1.26812565 |
| ECD         | NM_007265.1 | ECD          | 10 | Homo sapiens | GCR2; HSGT1                 | 0.00429883 | 0.00556969 | 1.26622946 |
| C12orf62    | NM_032901.2 | C12ORF62     | 12 | Homo sapiens | MGC14288                    | 0.00244437 | 0.00343315 | 1.26586784 |
| OAZ2        | NM_002537.2 | OAZ2         | 15 | Homo sapiens | AZ2                         | 0.02824443 | 0.02759958 | 1.26576772 |
| LOC648705   | XM_937787.1 | LOC648705    |    |              | PREDICTED: Homo sapiens h   | 0.02040781 | 0.02096945 | 1.26321363 |
| NFE2L1      | NM_003204.1 | NFE2L1       | 17 | Homo sapiens | FLJ00380; TCF               | 0.00013094 | 0.00029732 | 1.26292952 |
| COX15       | NM_004376.3 | COX15        | 10 | Homo sapiens | COX15 homolo                | 0.01056037 | 0.01020865 | 1.2628013  |
| GOLGB1      | NM_004487.1 | GOLGB1       | 3  | Homo sapiens | GOLIM1; GCP                 | 9.7155E-05 | 0.00023425 | 1.26105665 |
|             | Hs.542428   | HS.542428    | 20 |              | xc76e10.x1 NCI_CGAP_Ov32    | 0.00798737 | 0.00947428 | 1.26077479 |
| RCOR3       | NM_018254.2 | RCOR3        | 1  | Homo sapiens | FLJ10876; RP                | 0.00479853 | 0.00612664 | 1.2601393  |
| LOC440928   | XM_942885.1 | LOC440928    |    |              | PREDICTED: Homo sapiens h   | 0.0092354  | 0.01073832 | 1.25768985 |
| CDS1        | NM_001263.2 | CDS1         | 4  | Homo sapiens | CDS                         | 0.00087017 | 0.00142788 | 1.25581025 |
| RC3H2       | NM_018835.1 | RC3H2        | 9  | Homo sapiens | MGC52176; M                 | 0.04829553 | 0.04312487 | 1.25523079 |
| HMOX1       | NM_002133.1 | HMOX1        | 22 | Homo sapiens | HO-1; bK286E                | 0.00738998 | 0.00886514 | 1.25494871 |
| OR5D16      | NM_00100549 | OR5D16       | 11 | Homo sapiens | OR11-154                    | 0.02841502 | 0.02771688 | 1.25119984 |
| NSUN5C      | NM_145645.1 | NSUN5C       | 7  | Homo sapiens | WBSCR20B; N                 | 0.00288881 | 0.00395111 | 1.24586702 |
| LOC10013442 | XR_038546.1 | LOC100134424 |    |              | PREDICTED: Homo sapiens n   | 0.04361117 | 0.03961122 | 1.24408494 |
| STARD3      | NM_006804.2 | STARD3       | 17 | Homo sapiens | es64; FLJ4137               | 0.01600347 | 0.01703646 | 1.24295686 |
| SNAPC1      | NM_003082.2 | SNAPC1       | 14 | Homo sapiens | SNAP43; PTFg                | 0.0487757  | 0.04346516 | 1.24233756 |
| GTF2H4      | NM_001517.4 | GTF2H4       | 6  | Homo sapiens | TFIIH                       | 0.00219057 | 0.00313183 | 1.24116152 |
| KCTD10      | NM_031954.3 | KCTD10       | 12 | Homo sapiens | MSTP028; FLJ                | 0.02878113 | 0.02799619 | 1.24066668 |
| LOC10012851 | XM_00171575 | LOC100128510 |    |              | PREDICTED: Homo sapiens h   | 0.01430944 | 0.01550395 | 1.23912415 |
| STAG3L2     | NM_00101373 | STAG3L2      | 7  | Homo sapiens | MGC131759                   | 0.00066195 | 0.00113393 | 1.23684064 |
| ZSWIM1      | NM_080603.3 | ZSWIM1       | 20 | Homo sapiens | C2orf162                    | 0.00064397 | 0.00110896 | 1.23681588 |
| SGSH        | NM_000199.2 | SGSH         | 17 | Homo sapiens | HSS; MPS3A;                 | 0.00516374 | 0.0065274  | 1.23576371 |
| C10orf32    | NM_144591.1 | C10ORF32     | 10 | Homo sapiens | RP11-753C18.                | 0.01106752 | 0.01250727 | 1.23253167 |
| LOC729375   | NR_024252.1 | LOC729375    | 3  |              | Homo sapiens family with se | 0.01216569 | 0.01352874 | 1.2302602  |
| PRDM16      | NM_022114.2 | PRDM16       | 1  | Homo sapiens | PFM13; MEL1;                | 0.04562735 | 0.04116126 | 1.23011249 |
| ALG5        | NM_013338.3 | ALG5         | 13 | Homo sapiens | ba421P11.2; f               | 0.00055635 | 0.00098614 | 1.22929215 |
| EAF1        | NM_033083.5 | EAF1         | 3  | Homo sapiens | ELL associatec              | 0.00037324 | 0.00070623 | 1.22904515 |
| LYRM2       | NM_020466.3 | LYRM2        | 6  | Homo sapiens | DJ12208.2; FI               | 0.01924633 | 0.01994182 | 1.2279413  |
| TRIP4       | NM_016213.3 | TRIP4        | 15 | Homo sapiens | HsT17391                    | 0.00395392 | 0.00519647 | 1.22744028 |
| FAM91A1     | NM_144963.1 | FAM91A1      | 8  | Homo sapiens | DKFZp666B10                 | 0.01422311 | 0.01542566 | 1.22393908 |
| SATB2       | NM_015265.1 | SATB2        | 2  | Homo sapiens | MGC119474; I                | 0.01319446 | 0.0144837  | 1.22063894 |
| SH2B3       | NM_005475.1 | SH2B3        | 12 | Homo sapiens | LNK                         | 0.00070023 | 0.0011879  | 1.21995313 |
| MC1R        | NM_002386.2 | MC1R         | 16 | Homo sapiens | SHEP1; MSH-F                | 0.04014123 | 0.03693751 | 1.21994492 |
| C9orf156    | NM_016481.2 | C9ORF156     | 9  | Homo sapiens | NAP1; RP11-2                | 0.04999503 | 0.04431768 | 1.21945028 |
|             | Hs.14555    | HS.14555     | 10 |              | Homo sapiens cDNA: FLJ215   | 0.00153697 | 0.00231469 | 1.21941601 |
| OSBPL7      | NM_145798.2 | OSBPL7       | 17 | Homo sapiens | MGC71150; O                 | 0.01651437 | 0.0175081  | 1.21910289 |
| PIM2        | NM_006875.2 | PIM2         |    |              | Homo sapiens pim-2 oncog    | 0.00970001 | 0.01118222 | 1.21858942 |
| VPS37A      | NM_152415.1 | VPS37A       | 8  | Homo sapiens | HCRP1; FLJ32                | 0.00288828 | 0.00395101 | 1.21740759 |
| AGK         | NM_018238.2 | AGK          | 7  | Homo sapiens | MULK; FLJ108                | 0.0110434  | 0.01248162 | 1.2171387  |
| ZGPAT       | NM_181484.1 | ZGPAT        | 20 | Homo sapiens | ZC3H9; ZC3H                 | 0.03998566 | 0.03682525 | 1.21655434 |
| LOC148413   | NR_015434.1 | LOC148413    | 1  |              | Homo sapiens hypothetical L | 0.00199693 | 0.00289031 | 1.21649032 |
| PPFIA1      | NM_003626.2 | PPFIA1       | 11 | Homo sapiens | MGC26800; FI                | 0.00048404 | 0.00087603 | 1.21538071 |
| ZNF295      | NM_020727.3 | ZNF295       | 21 | Homo sapiens | ZBTB21; DKFz                | 0.02272023 | 0.023014   | 1.21526475 |
| SLC4A5      | NM_133478.2 | SLC4A5       | 2  | Homo sapiens | NBC4; MGC12                 | 0.00333687 | 0.00448014 | 1.21266318 |
| MDM2        | NM_006879.2 | MDM2         | 12 | Homo sapiens | hdm2; HDMX;                 | 0.04949063 | 0.04396828 | 1.21252261 |
| KIAA0355    | NM_014686.2 | KIAA0355     | 19 | Homo sapiens | KIAA0355 (KI/               | 0.00113314 | 0.00178816 | 1.21238922 |
| KLHL24      | NM_017644.3 | KLHL24       | 3  | Homo sapiens | FLJ25796; KR                | 0.03883942 | 0.03593937 | 1.21208782 |
| ADO         | NM_032804.5 | ADO          | 10 | Homo sapiens | FLJ14547; DK                | 0.0015722  | 0.00235723 | 1.21196806 |
| SCNM1       | NM_024041.2 | SCNM1        | 1  | Homo sapiens | MGC3180                     | 0.03788192 | 0.03521678 | 1.21092057 |

## 5.0 Upreg

|             |                         |                                 |            |            |            |
|-------------|-------------------------|---------------------------------|------------|------------|------------|
| GPT2        | NM_133443.1 GPT2        | 16 Homo sapiens ALT2            | 3.8118E-05 | 0.00010962 | 1.2107004  |
| SEC23IP     | NM_007190.2 SEC23IP     | 10 Homo sapiens P125; MSTP05    | 0.00054233 | 0.0009648  | 1.20426981 |
| AUP1        | NM_012103.2 AUP1        | 2 Homo sapiens ancient ubiqi    | 0.00666831 | 0.00812495 | 1.20344189 |
| RHOT2       | NM_138769.1 RHOT2       | 16 Homo sapiens C16orf39; AR    | 0.01281152 | 0.01412342 | 1.20224166 |
| COQ10A      | NM_144576.2 COQ10A      | 12 Homo sapiens FLJ32452        | 0.0234462  | 0.02366467 | 1.20137883 |
| NR1H3       | NM_005693.1 NR1H3       | 11 Homo sapiens LXR-a; LXRA;    | 0.02024356 | 0.0208324  | 1.20100676 |
| COMMD2      | NM_016094.2 COMMD2      | 3 Homo sapiens HSPC042; MG      | 0.01750434 | 0.01841303 | 1.20004284 |
| MSTO1       | NM_018116.2 MSTO1       | 1 Homo sapiens LST005; DKFZ     | 0.00406235 | 0.00532066 | 1.19660948 |
| PDCD10      | NM_145860.1 PDCD10      | 3 Homo sapiens TFAR15; MGC      | 0.00766757 | 0.00914563 | 1.19590746 |
| IWS1        | NM_017969.1 IWS1        | 2 Homo sapiens MGC126376; I     | 0.00102038 | 0.00163582 | 1.19502992 |
| NSUN5       | NM_148956.1 NSUN5       | 7 Homo sapiens p120; FLJ102     | 0.00058866 | 0.00103154 | 1.19438835 |
| EXTL3       | NM_001440.2 EXTL3       | 8 Homo sapiens KIAA0519; RE     | 0.0029336  | 0.00400055 | 1.19025615 |
| CDC42BPB    | NM_006035.2 CDC42BPB    | 14 Homo sapiens KIAA1124; MR    | 0.00749859 | 0.00897213 | 1.1900792  |
| ATXN7L3     | Hs.512651 ATXN7L3       | 17 Homo sapiens DKFZp761G21     | 0.000956   | 0.00154645 | 1.18755218 |
| TPR         | NM_005807.2 TPR         | 1 Homo sapiens translocated p   | 0.00196074 | 0.00284638 | 1.18564098 |
|             | Hs.542993 HS.542993     | 3 xj89b12.x1 Soares_NFL_T_G     | 0.03198787 | 0.03056983 | 1.18291951 |
| ANKIB1      | NM_019004.1 ANKIB1      | 7 Homo sapiens DKFZP434A02      | 0.00043838 | 0.00080654 | 1.18168139 |
| C19orf6     | NM_00103302 C19ORF6     | 19 Homo sapiens R32184_3; AS    | 0.00021133 | 0.00043929 | 1.18130471 |
| MVP         | NM_017458.2 MVP         | 16 Homo sapiens LRP; VAULT1     | 0.01501782 | 0.01614388 | 1.18061759 |
| SDSL        | NM_138432.2 SDSL        | 12 Homo sapiens SDS-RS1         | 0.00428683 | 0.00555742 | 1.1806013  |
| C1orf63     | NM_207035.1 C1ORF63     | 1 Homo sapiens RP3-465N24.4     | 0.00309684 | 0.00419899 | 1.17991813 |
| GOLT1B      | NM_016072.2 GOLT1B      | 12 Homo sapiens GOT1; YMR29     | 0.01093054 | 0.0123684  | 1.17921238 |
| FLJ25363    | XM_00172072 FLJ25363    | PREDICTED: Homo sapiens s       | 0.00630505 | 0.00775666 | 1.17903624 |
| TUG1        | NR_002323.1 TUG1        | 22 Homo sapiens MGC46067; FI    | 6.9179E-05 | 0.00017706 | 1.17897948 |
| C11orf73    | NM_016401.2 C11ORF73    | 11 Homo sapiens L7RN6; HSPC1    | 0.00893675 | 0.01044367 | 1.17890161 |
| TMUB2       | NM_024107.2 TMUB2       | 17 Homo sapiens MGC3123; FP     | 0.01262083 | 0.01394826 | 1.1780431  |
| WSB1        | NM_134264.2 WSB1        | 17 Homo sapiens WSB-1; SWIP     | 0.00096204 | 0.00155421 | 1.17474755 |
| GGPS1       | NM_004837.2 GGPS1       | 1 Homo sapiens GGPPS1; GGP      | 0.01725781 | 0.01820171 | 1.17223122 |
| ENTPD6      | NM_001247.1 ENTPD6      | 20 Homo sapiens DKFZp781K21     | 0.00977711 | 0.01125631 | 1.1718254  |
| IDH3A       | NM_005530.2 IDH3A       | 15 Homo sapiens isocitrate dehy | 0.02171111 | 0.02211439 | 1.17175873 |
| TTC5        | NM_138376.1 TTC5        | 14 Homo sapiens Strap           | 0.01989357 | 0.02052036 | 1.17134031 |
| PNKP        | NM_007254.2 PNKP        | 19 Homo sapiens PNK             | 0.00067377 | 0.0011508  | 1.17129526 |
| DLEU1       | NR_002605.1 DLEU1       | 13 Homo sapiens XTP6; MGC22     | 0.01784743 | 0.01869548 | 1.16933874 |
| STX5        | NM_003164.2 STX5        | 11 Homo sapiens STX5A; SED5     | 0.0007     | 0.00118773 | 1.16872911 |
| TMEM181     | XM_941693.1 TMEM181     | 6 Homo sapiens KIAA1423; GP     | 2.4929E-05 | 7.8088E-05 | 1.16835491 |
| GPN2        | NM_018066.3 GPN2        | 1 Homo sapiens FLJ10349         | 0.00341222 | 0.00456663 | 1.16813298 |
| PEX19       | NM_002857.2 PEX19       | 1 Homo sapiens D1S2223E; PX     | 0.04837413 | 0.04318627 | 1.16660921 |
| ZMYND19     | NM_138462.2 ZMYND19     | 9 Homo sapiens MIZIP; RP11-4    | 0.00117375 | 0.00184396 | 1.16652375 |
| LOC440341   | XM_932044.1 LOC440341   | 16 PREDICTED: Homo sapiens s    | 0.00050746 | 0.0009107  | 1.16248531 |
| LOC389517   | NM_00103238 LOC389517   | Homo sapiens similar to Willi   | 0.00019709 | 0.00041478 | 1.16133571 |
| YTHDF3      | NM_152758.3 YTHDF3      | 8 Homo sapiens FLJ31657         | 0.04891802 | 0.0435566  | 1.15532696 |
| KPNA1       | NM_002264.1 KPNA1       | 3 Homo sapiens SRP1; RCH2; I    | 0.01110123 | 0.0125389  | 1.15390471 |
| ZNF800      | NM_176814.3 ZNF800      | 7 Homo sapiens MGC130033; I     | 0.04963563 | 0.04405695 | 1.15334375 |
| TYW1B       | XR_015176.2 TYW1B       | 7 PREDICTED: Homo sapiens n     | 0.01887318 | 0.01959916 | 1.15328819 |
| LOC10013256 | XM_00171380 LOC10013256 | 12 PREDICTED: Homo sapiens h    | 0.00011006 | 0.00025847 | 1.15148329 |
| LRRFIP1     | NM_004735.2 LRRFIP1     | 2 Homo sapiens MGC10947; G      | 0.01354327 | 0.01480178 | 1.14946826 |
| KIAA2013    | NM_138346.1 KIAA2013    | 1 Homo sapiens MGC33867; R      | 0.00038716 | 0.00072801 | 1.14942812 |
| UAP1        | NM_003115.3 UAP1        | 1 Homo sapiens AGX1; AgX; S     | 0.00402029 | 0.00527659 | 1.14511318 |
| USP8        | NM_005154.2 USP8        | 15 Homo sapiens KIAA0055; FL    | 0.01118744 | 0.01261192 | 1.14490156 |
| C5orf15     | NM_020199.1 C5ORF15     | 5 Homo sapiens HTGN29; KCT      | 0.00021269 | 0.00044118 | 1.14204716 |
| KRT19       | NM_002276.3 KRT19       | 17 Homo sapiens K19; CK19; M    | 0.00079519 | 0.00132516 | 1.14176088 |
| PNO1        | NM_020143.2 PNO1        | 2 Homo sapiens KHRBP1           | 0.05563373 | 0.04850261 | 1.14146245 |
| TM2D3       | NM_025141.2 TM2D3       | 15 Homo sapiens BLP2            | 0.00062274 | 0.00107982 | 1.13971991 |
| C4orf14     | NM_032313.2 C4ORF14     | 4 Homo sapiens mAtnOS1; hA      | 6.1992E-05 | 0.00016169 | 1.13867938 |
| KCNQ2       | NM_004518.2 KCNQ2       | 20 Homo sapiens KVEBN1; KV7     | 0.03149737 | 0.03018655 | 1.13683502 |
| SPOP        | NM_00100722 SPOP        | 17 Homo sapiens TEF2            | 7.7757E-05 | 0.00019515 | 1.13650988 |
| DYNC1H1     | NM_001376.2 DYNC1H1     | 14 Homo sapiens DNECL; DNCH     | 6.9944E-05 | 0.00017871 | 1.13643062 |
| MGC52000    | NM_198943.1 MGC52000    | 2 Homo sapiens XCYorf1; MGC     | 0.00138424 | 0.00212109 | 1.13600162 |
| RAB2B       | NM_032846.2 RAB2B       | 14 Homo sapiens FLJ14824        | 0.00027202 | 0.00054034 | 1.13581347 |
| ACVR1       | NM_001105.2 ACVR1       | 2 Homo sapiens ALK2; SKR1; f    | 0.00708883 | 0.00855182 | 1.13490362 |
| NP1P        | NM_006985.1 NP1P        | 16 Homo sapiens nuclear pore c  | 0.03228552 | 0.0308006  | 1.13473901 |
| FBXL12      | NM_017703.1 FBXL12      | 19 Homo sapiens Fbl12; FLJ201   | 0.04022918 | 0.03698741 | 1.13446138 |
| SLC30A9     | NM_006345.3 SLC30A9     | 4 Homo sapiens C4orf1; HUEL;    | 0.0001583  | 0.00034759 | 1.13420505 |
| EAPP        | NM_018453.3 EAPP        | 14 Homo sapiens FLJ20578; MG    | 0.00229855 | 0.00326494 | 1.13290095 |
| KPNA4       | NM_002268.3 KPNA4       | 3 Homo sapiens MGC12217; M      | 0.00378531 | 0.00499885 | 1.13202241 |
| LOC728138   | XM_00112828 LOC728138   | 16 PREDICTED: Homo sapiens h    | 0.00447727 | 0.00576598 | 1.13157923 |
| POLR3C      | NM_006468.5 POLR3C      | 1 Homo sapiens RPC62; RPC3      | 0.00898616 | 0.01048884 | 1.1315777  |
| KIAA0528    | NM_014802.1 KIAA0528    | 12 Homo sapiens DKFZp779N20     | 0.01018554 | 0.01165314 | 1.13035063 |
| PMPCA       | NM_015160.1 PMPCA       | 9 Homo sapiens Alpha-MPP; KI    | 0.00041352 | 0.00076967 | 1.13033706 |
| LOC440348   | NM_00101805 LOC440348   | 16 Homo sapiens A-761H5.4       | 0.01596269 | 0.01700543 | 1.12965557 |

## 5.0 Upreg

|             |             |              |   |                                 |            |            |            |
|-------------|-------------|--------------|---|---------------------------------|------------|------------|------------|
| LOC729148   | XM_372205.4 | LOC729148    | X | PREDICTED: Homo sapiens s       | 0.00371545 | 0.00491843 | 1.1293886  |
| GOLGA5      | NM_005113.2 | GOLGA5       |   | 14 Homo sapiens RFG5; ret-II; ( | 0.01259088 | 0.01392216 | 1.12880455 |
| FOXJ3       | NM_014947.3 | FOXJ3        |   | 1 Homo sapiens MGC165036; I     | 0.0055932  | 0.00699768 | 1.12625525 |
| RAB3GAP1    | NM_012233.1 | RAB3GAP1     |   | 2 Homo sapiens RAB3GAP; RAI     | 0.00735216 | 0.00882823 | 1.12522912 |
| APEX2       | NM_014481.2 | APEX2        | X | Homo sapiens XTH2; APEXL2       | 0.00246521 | 0.00345689 | 1.12442942 |
| YIPF6       | NM_173834.2 | YIPF6        | X | Homo sapiens RP13-253K9.1       | 0.00028871 | 0.00056887 | 1.12418159 |
| BRPF1       | NM_00100369 | BRPF1        |   | 3 Homo sapiens BR140            | 0.00477034 | 0.00609776 | 1.12402693 |
| MRPL53      | NM_053050.2 | MRPL53       |   | 2 Homo sapiens MGC20402; FL     | 0.03629794 | 0.03397462 | 1.12366819 |
| CHUK        | NM_001278.3 | CHUK         |   | 10 Homo sapiens NFKBIKA; IKK    | 0.01060633 | 0.01206847 | 1.12173273 |
| PARP4       | NM_006437.2 | PARP4        |   | 13 Homo sapiens p193; PARPL;    | 7.722E-05  | 0.00019402 | 1.1204985  |
| BIVM        | NM_017693.2 | BIVM         |   | 13 Homo sapiens MGC133326       | 0.01272785 | 0.0140506  | 1.12007108 |
| PAN2        | NM_014871.2 | PAN2         |   | 12 Homo sapiens PAN2; hPAN2;    | 0.02941535 | 0.02853718 | 1.11953527 |
| C1orf128    | NM_020362.2 | C1ORF128     |   | 1 Homo sapiens TXNL1CL; HT0     | 0.00204729 | 0.00295492 | 1.11946392 |
|             | Hs.348514   | HS.348514    |   | 4 Homo sapiens, clone IMAGE:    | 0.00060805 | 0.00105833 | 1.11934115 |
| HDHD2       | NM_032124.3 | HDHD2        |   | 18 Homo sapiens S110052N05R     | 0.03252605 | 0.03097618 | 1.11552672 |
|             | Hs.545976   | HS.545976    | X | xm52h06.x1 NCI_CGAP_GC6         | 0.03529711 | 0.03319722 | 1.11397844 |
| GORASP2     | NM_015530.3 | GORASP2      |   | 2 Homo sapiens GOLPH6; p59;     | 0.00242457 | 0.00341026 | 1.11300835 |
| LOC728457   | XR_037027.1 | LOC728457    |   | 7 PREDICTED: Homo sapiens n     | 0.04337862 | 0.03941632 | 1.11099838 |
| EDC4        | NM_014329.3 | EDC4         |   | 16 Homo sapiens HEDLS; RCD-ε    | 0.00101582 | 0.00162939 | 1.11034311 |
| LOC728734   | XM_930180.1 | LOC728734    |   | 16 PREDICTED: Homo sapiens s    | 0.03096947 | 0.02974887 | 1.11020796 |
| MBTPS1      | NM_201268.1 | MBTPS1       |   | 16 Homo sapiens MGC138712; I    | 0.00171223 | 0.00253726 | 1.11005402 |
| LOC643336   | XM_00171856 | LOC643336    |   | PREDICTED: Homo sapiens s       | 0.01059988 | 0.01206269 | 1.10534684 |
| KIAA0194    | XM_940209.1 | KIAA0194     |   | PREDICTED: Homo sapiens K       | 0.00482646 | 0.00615872 | 1.10441278 |
| C17orf90    | XM_941327.1 | C17ORF90     |   | 17 Homo sapiens MGC104712       | 0.00512052 | 0.0064821  | 1.10318753 |
| PFDN6       | NM_014260.2 | PFDN6        |   | 6 Homo sapiens HKE2; PFD6; I    | 0.00067731 | 0.00115595 | 1.10280717 |
| MRPL21      | NM_181513.1 | MRPL21       |   | 11 Homo sapiens MGC62013        | 0.00097481 | 0.00157196 | 1.10240467 |
| HERPUD1     | NM_00101099 | HERPUD1      |   | 16 Homo sapiens Mif1; SUP; HE   | 0.00659694 | 0.00805252 | 1.10133981 |
| POLR2B      | NM_000938.1 | POLR2B       |   | 4 Homo sapiens RPB2; hsRPB2     | 0.00277512 | 0.00381764 | 1.10111513 |
| C17orf70    | NM_025161.3 | C17ORF70     |   | 17 Homo sapiens FAAP100; FLJ:   | 0.00466857 | 0.00597986 | 1.09936308 |
| C1orf55     | NM_152608.2 | C1ORF55      |   | 1 Homo sapiens dj671D7.1; FL    | 0.04635922 | 0.0416758  | 1.0988338  |
| ERCC1       | NM_001983.2 | ERCC1        |   | 19 Homo sapiens UV20; COFS4     | 0.04249447 | 0.03874535 | 1.09851929 |
| KIAA0907    | NM_014949.2 | KIAA0907     |   | 1 Homo sapiens RP11-336K24.     | 0.03969145 | 0.03659655 | 1.09851736 |
| LOC10013051 | XM_00172034 | LOC100130516 |   | PREDICTED: Homo sapiens h       | 0.02405924 | 0.02419159 | 1.09795741 |
| DUS1L       | NM_022156.3 | DUS1L        |   | 17 Homo sapiens DUS1; PP3111    | 0.03120424 | 0.02993178 | 1.09746416 |
| SRP19       | NM_003135.1 | SRP19        |   | 5 Homo sapiens signal recognit  | 0.0112831  | 0.01270507 | 1.09633688 |
| EXOC7       | NM_015219.2 | EXOC7        |   | 17 Homo sapiens Exo70p; 2-5-3   | 0.00239069 | 0.00337288 | 1.09612317 |
| CCDC90B     | NM_021825.3 | CCDC90B      |   | 11 Homo sapiens MDS011; MGC     | 0.02154192 | 0.02198288 | 1.09523532 |
| KIAA1598    | NM_018330.3 | KIAA1598     |   | 10 Homo sapiens shootin1; shoc  | 0.00268552 | 0.00371242 | 1.09440149 |
| LOC728888   | XM_930046.1 | LOC728888    |   | 16 PREDICTED: Homo sapiens s    | 0.00111678 | 0.00176743 | 1.09429977 |
| UBP1        | NM_014517.2 | UBP1         |   | 3 Homo sapiens LBP-1B; LBP1/    | 0.00544109 | 0.00683173 | 1.09396302 |
| LOC10013254 | XR_039468.1 | LOC10013254  |   | 12 PREDICTED: Homo sapiens n    | 0.01120043 | 0.01262332 | 1.09339884 |
| C22orf30    | NM_173566.2 | C22ORF30     |   | 22 Homo sapiens chromosome 2    | 0.03717838 | 0.03467295 | 1.09310584 |
| NAT9        | NM_015654.3 | NAT9         |   | 17 Homo sapiens E BSP; DKFZP5   | 0.02996391 | 0.02897645 | 1.0928495  |
| CCDC28A     | NM_015439.2 | CCDC28A      |   | 6 Homo sapiens C6orf80; CCRI    | 0.05437277 | 0.0475782  | 1.092709   |
| GOT1        | NM_002079.1 | GOT1         |   | 10 Homo sapiens GIG18           | 0.00038236 | 0.00072101 | 1.09028629 |
| PICALM      | NM_007166.2 | PICALM       |   | 11 Homo sapiens LAP; CALM; CI   | 0.02410124 | 0.02422548 | 1.08898847 |
| CETN2       | NM_004344.1 | CETN2        | X | Homo sapiens CEN2; CALT         | 0.00407496 | 0.00533558 | 1.08859135 |
| VIL2        | NM_003379.3 | VIL2         |   | 6 Homo sapiens MGC1584; CVI     | 0.00094871 | 0.00153777 | 1.08819633 |
| INTS9       | NM_018250.1 | INTS9        |   | 8 Homo sapiens RC74; FLJ108     | 0.01247596 | 0.01381076 | 1.08817455 |
| STK36       | NM_015690.2 | STK36        |   | 2 Homo sapiens FU; DKFZp434     | 0.02654647 | 0.02625028 | 1.08778743 |
| LOC647954   | XM_938141.1 | LOC647954    |   | PREDICTED: Homo sapiens n       | 0.01113539 | 0.01256616 | 1.08755028 |
| CCDC6       | NM_005436.2 | CCDC6        |   | 10 Homo sapiens TST1; TPC; PT   | 0.00437096 | 0.00564647 | 1.08715384 |
| SNRPB2      | NM_003092.3 | SNRPB2       |   | 20 Homo sapiens MGC45309; M     | 0.00017978 | 0.00038445 | 1.08642399 |
| SEC16A      | NM_014866.1 | SEC16A       |   | 9 Homo sapiens RP11-413M3.1     | 0.02504225 | 0.02501659 | 1.08617524 |
| TSPAN3      | NM_198902.1 | TSPAN3       |   | 15 Homo sapiens TM4-A; TSPAN    | 0.00150275 | 0.00227134 | 1.08604781 |
| CLINT1      | NM_014666.2 | CLINT1       |   | 5 Homo sapiens KIAA0171; EP:    | 0.00628711 | 0.00774436 | 1.08601543 |
| LOC728791   | XR_015547.2 | LOC728791    |   | PREDICTED: Homo sapiens n       | 0.02966925 | 0.02874536 | 1.08577371 |
| COPA        | NM_004371.2 | COPA         |   | 1 Homo sapiens FLJ26320; HEI    | 0.00192733 | 0.00280577 | 1.08555195 |
| RPS6KB1     | NM_003161.2 | RPS6KB1      |   | 17 Homo sapiens p70-alpha; p7   | 0.02053598 | 0.02108386 | 1.08487272 |
| MRPS10      | NM_018141.2 | MRPS10       |   | 6 Homo sapiens FLJ10567; PN/    | 0.00043231 | 0.00079754 | 1.08475298 |
| LOC441131   | XR_038026.1 | LOC441131    |   | PREDICTED: Homo sapiens n       | 0.03646138 | 0.0340985  | 1.08472333 |
| LOC10013224 | NM_00113586 | LOC10013224  |   | 16 Homo sapiens similar to Uncl | 0.00773961 | 0.00921277 | 1.08449955 |
| PWP1        | NM_007062.1 | PWP1         |   | 12 Homo sapiens IEF-SSP-9502    | 0.00166922 | 0.0024819  | 1.0844735  |
| PRPF4       | NM_004697.3 | PRPF4        |   | 9 Homo sapiens HPRP4P; PRP4     | 0.00141181 | 0.00215655 | 1.08403269 |
| LOC10013030 | XR_036947.1 | LOC100130308 |   | PREDICTED: Homo sapiens n       | 0.01074321 | 0.01218471 | 1.08365797 |
| RRP7A       | NM_015703.3 | RRP7A        |   | 22 Homo sapiens MGC150422; I    | 0.00953666 | 0.01103014 | 1.0830585  |
| QDPR        | NM_000320.1 | QDPR         |   | 4 Homo sapiens FLJ42391; DH     | 0.00353011 | 0.00470789 | 1.08250623 |
| VAMP3       | NM_004781.3 | VAMP3        |   | 1 Homo sapiens CEB              | 0.02867174 | 0.02792384 | 1.08125545 |
| LOC643384   | XR_016363.2 | LOC643384    |   | 4 PREDICTED: Homo sapiens h     | 0.04282176 | 0.03899514 | 1.08117177 |
| AGPAT2      | NM_00101272 | AGPAT2       |   | 9 Homo sapiens LPAAB; LPAAT-    | 0.04375893 | 0.03972076 | 1.08111592 |

## 5.0 Upreg

|             |                          |                                |            |            |            |
|-------------|--------------------------|--------------------------------|------------|------------|------------|
| SAMM50      | NM_015380.3 SAMM50       | 22 Homo sapiens OMP85; TOB5    | 0.00657341 | 0.00802938 | 1.08055218 |
| PRDX2       | NM_181738.1 PRDX2        | 19 Homo sapiens TDPX1; MGC4    | 0.00418843 | 0.00545646 | 1.07976317 |
| CTGLF3      | NM_00107766 CTGLF3       | Homo sapiens BA324H6.1         | 0.02830695 | 0.02764527 | 1.07846494 |
| GTF2F2      | NM_004128.1 GTF2F2       | 13 Homo sapiens T2F2; BTF4;    | 0.00320815 | 0.00432851 | 1.07837902 |
| DUSP5       | NM_004419.3 DUSP5        | 10 Homo sapiens HVH3; DUSP     | 0.0032326  | 0.00435614 | 1.07830461 |
| ADM         | NM_001124.1 ADM          | 11 Homo sapiens AM             | 0.00026213 | 0.00052582 | 1.07826729 |
| EIF3G       | NM_003755.2 EIF3G        | 19 Homo sapiens EIF3S4; EIF3-  | 0.00074011 | 0.00124735 | 1.07826155 |
| POLRMT      | NM_005035.2 POLRMT       | 19 Homo sapiens h-mtRPOL; MT   | 0.04772477 | 0.04271084 | 1.07747976 |
| ROBLD3      | NM_014017.2 ROBLD3       | Homo sapiens roadblock dorr    | 0.00185095 | 0.00271032 | 1.07690525 |
| RFNG        | NM_002917.1 RFNG         | 17 Homo sapiens RFNG O-fucos'  | 0.05168737 | 0.04556466 | 1.07647932 |
| PMPCB       | NM_004279.1 PMPCB        | 7 Homo sapiens Beta-MPP; MP    | 0.00632178 | 0.00777397 | 1.07638927 |
| DERL1       | NM_024295.3 DERL1        | 8 Homo sapiens DER-1; FLJ42    | 0.04095056 | 0.03754836 | 1.07554711 |
| TYK2        | NM_003331.3 TYK2         | 19 Homo sapiens JTK1           | 0.02813641 | 0.02751548 | 1.07532464 |
| ANAPC4      | NM_013367.2 ANAPC4       | 4 Homo sapiens APC4            | 0.04404154 | 0.03994423 | 1.07460041 |
| LOC10013436 | XM_00171381 LOC100134364 | PREDICTED: Homo sapiens h      | 0.00212833 | 0.00305779 | 1.07452625 |
| LOC647340   | NM_005174.2 LOC647340    | PREDICTED: Homo sapiens s      | 0.000652   | 0.00112016 | 1.07401547 |
| CPSF3       | NM_016207.2 CPSF3        | 2 Homo sapiens CPSF; CPSF73    | 0.01537291 | 0.01647715 | 1.07221212 |
| TSG101      | NM_006292.2 TSG101       | 11 Homo sapiens VPS23; TSG1    | 0.01623662 | 0.01725953 | 1.07107848 |
| NRD1        | NM_002525.1 NRD1         | 1 Homo sapiens hNRD2; hNRD     | 0.00562831 | 0.00703759 | 1.07054504 |
| PCID2       | NM_018386.1 PCID2        | 13 Homo sapiens MGC16774; FI   | 0.00053022 | 0.00094537 | 1.0695762  |
| NIPA2       | NM_030922.5 NIPA2        | 15 Homo sapiens MGC5466        | 0.03062644 | 0.02947744 | 1.06876046 |
| LOC440353   | NR_002603.1 LOC440353    | 16 Homo sapiens nuclear pore c | 0.00304178 | 0.00413584 | 1.06716371 |
| PIGY        | NM_032906.2 PIGY         | 4 Homo sapiens MGC14156; PI    | 0.00094037 | 0.00152623 | 1.06710004 |
| COQ10B      | NM_025147.2 COQ10B       | 2 Homo sapiens FLJ13448        | 0.02687237 | 0.02650682 | 1.06668323 |
| STT3A       | NM_152713.2 STT3A        | 11 Homo sapiens STT3-A; TMC;   | 0.00207038 | 0.00298431 | 1.06652211 |
| GRSF1       | NM_002092.2 GRSF1        | 4 Homo sapiens FLJ13125        | 0.02982298 | 0.02885925 | 1.06607448 |
| ZNF598      | NM_178167.2 ZNF598       | 16 Homo sapiens FLJ00086; DK   | 0.05036138 | 0.04456588 | 1.06556778 |
| SLC16A3     | NM_004207.2 SLC16A3      | 17 Homo sapiens MCT3; MGC13    | 0.00483718 | 0.00616971 | 1.06407096 |
| PSMB7       | NM_002799.2 PSMB7        | 9 Homo sapiens Z               | 0.00204006 | 0.00294497 | 1.06312632 |
| ATP6V1G1    | NM_004888.2 ATP6V1G1     | 9 Homo sapiens Vma10; ATP6J    | 0.00822406 | 0.00972217 | 1.06286938 |
| ODC1        | NM_002539.1 ODC1         | 2 Homo sapiens ornithine deca  | 0.00248294 | 0.00347731 | 1.06282805 |
| LOC646630   | XM_929572.1 LOC646630    | 13 PREDICTED: Homo sapiens s   | 0.01062853 | 0.01208589 | 1.06198905 |
| SS18L2      | NM_016305.1 SS18L2       | 3 Homo sapiens KIAA-iso        | 0.00108033 | 0.00171873 | 1.06123087 |
| LOC728324   | XR_015322.2 LOC728324    | PREDICTED: Homo sapiens n      | 0.03626138 | 0.03394764 | 1.06084753 |
| COPS5       | NM_006837.2 COPS5        | 8 Homo sapiens MGC3149; SG     | 0.00279753 | 0.00384185 | 1.06060903 |
| EIF3M       | NM_006360.3 EIF3M        | 11 Homo sapiens FLJ29030; GA   | 0.00250314 | 0.0034989  | 1.06030094 |
| ZRANB2      | NM_005455.3 ZRANB2       | 1 Homo sapiens DKFZp686J18:    | 0.04058167 | 0.03724515 | 1.05949369 |
| MAGED1      | NM_006986.3 MAGED1       | Homo sapiens NRAGE; DLX1I      | 0.01819567 | 0.01900128 | 1.05866839 |
| COPB1       | NM_016451.3 COPB1        | 11 Homo sapiens DKFZp761K10    | 0.01028586 | 0.01174953 | 1.05815764 |
| FAM39DP     | XM_925777.1 FAM39DP      | Homo sapiens FLJ25222          | 0.04686205 | 0.04202879 | 1.058003   |
| YWHAG       | NM_012479.2 YWHAG        | 7 Homo sapiens 14-3-3GAMMA     | 0.02217016 | 0.02253226 | 1.05599778 |
| EIF3E       | NM_001568.1 EIF3E        | 8 Homo sapiens eIF3e; INT6; e  | 0.00159469 | 0.00238728 | 1.05584006 |
| LOC650276   | XM_939363.1 LOC650276    | PREDICTED: Homo sapiens s      | 0.00696153 | 0.00841909 | 1.05344976 |
| VPS26A      | NM_00103526 VPS26A       | 10 Homo sapiens PEP8A; Hbeta!  | 0.02346872 | 0.02367923 | 1.05287272 |
| ANAPC5      | NM_016237.3 ANAPC5       | 12 Homo sapiens APC5; PDL-10;  | 0.02051489 | 0.02106714 | 1.0524925  |
| CYBA        | NM_000101.2 CYBA         | 16 Homo sapiens cytochrome b-  | 0.00669417 | 0.00815192 | 1.05213034 |
| MMADHC      | NM_015702.2 MMADHC       | 2 Homo sapiens methylmalonic   | 0.03956246 | 0.03651983 | 1.0519155  |
| TIMM23      | NM_006327.2 TIMM23       | 10 Homo sapiens PRO1197; TIM   | 0.005002   | 0.00635223 | 1.05138759 |
| C2orf25     | NM_015702.1 C2ORF25      | 2 Homo sapiens CL25022         | 0.00725915 | 0.0087249  | 1.05088862 |
| LOC613037   | NR_002473.1 LOC613037    | 16 Homo sapiens nuclear pore c | 0.03968891 | 0.03659805 | 1.04951081 |
| LOC730187   | XR_042419.1 LOC730187    | PREDICTED: Homo sapiens n      | 0.01113578 | 0.01256498 | 1.04738709 |
| CIRBP       | NM_001280.1 CIRBP        | 19 Homo sapiens CIRP           | 0.03181567 | 0.03044173 | 1.04734685 |
| SNRNP70     | NM_003089.4 SNRNP70      | 19 Homo sapiens U1AP; RPU1; I  | 0.01258321 | 0.01391544 | 1.04702552 |
| SQSTM1      | NM_003900.3 SQSTM1       | 5 Homo sapiens OSIL; p62B; p   | 0.00736956 | 0.00884548 | 1.04693055 |
| OAZ1        | NM_004152.2 OAZ1         | 19 Homo sapiens OAZ; MGC138    | 0.01056494 | 0.01203229 | 1.04618851 |
| PTS         | NM_000317.1 PTS          | 11 Homo sapiens PTPS           | 0.04992846 | 0.04426762 | 1.04613313 |
| PPP2CA      | NM_002715.2 PPP2CA       | 5 Homo sapiens PP2CA; RP-C;    | 0.00545054 | 0.00684066 | 1.04493802 |
| GDI2        | NM_001494.2 GDI2         | 10 Homo sapiens FLJ37352; FLJ  | 0.04084562 | 0.03746678 | 1.04458815 |
| RPRC1       | NM_018067.2 RPRC1        | 1 Homo sapiens PARCC1; FLJ1    | 0.0145892  | 0.01574485 | 1.04438436 |
| DNAJA2      | NM_005880.2 DNAJA2       | 16 Homo sapiens RDJ2; DNAJ; I  | 0.03922449 | 0.0362498  | 1.04391893 |
| IMMT        | NM_006839.1 IMMT         | 2 Homo sapiens PIG4; P87/89;   | 0.01857269 | 0.01933517 | 1.04339125 |
| HGS         | NM_004712.3 HGS          | 17 Homo sapiens HRS; ZFYVE8    | 0.04313096 | 0.03923191 | 1.04300477 |
| RPL36AL     | NM_001001.3 RPL36AL      | 14 Homo sapiens RPL36A; MGC:   | 0.0064155  | 0.00786607 | 1.04285031 |
| NDUFS4      | NM_002495.1 NDUFS4       | 5 Homo sapiens AQDQ            | 0.01537776 | 0.01648033 | 1.04270528 |
| ETF1        | NM_004730.1 ETF1         | 5 Homo sapiens ERF; TB3-1; R   | 0.02561652 | 0.02546559 | 1.0425116  |
| POLR1D      | NM_015972.1 POLR1D       | 13 Homo sapiens MGC9850; RP/   | 0.0303764  | 0.02930751 | 1.04250266 |
| RAB7A       | NM_004637.5 RAB7A        | 3 Homo sapiens PSN; CMT2B;     | 0.05104921 | 0.04510178 | 1.04242241 |
| NDUFV2      | NM_021074.1 NDUFV2       | 18 Homo sapiens NADH dehydr    | 0.05294456 | 0.0464675  | 1.04222941 |
| RPL5        | NM_000969.3 RPL5         | 1 Homo sapiens MSTP030; MG     | 0.0187531  | 0.0194906  | 1.04211065 |
| ZDHHC6      | NM_022494.1 ZDHHC6       | 10 Homo sapiens ZNF376; FLJ2:  | 0.02759703 | 0.02707855 | 1.04195934 |

5.0 Upreg

|             |             |              |    |                               |            |            |            |
|-------------|-------------|--------------|----|-------------------------------|------------|------------|------------|
| C19orf70    | NM_205767.1 | C19ORF70     | 19 | Homo sapiens chromosome 1     | 0.04096913 | 0.03755753 | 1.04134116 |
| NDUFA2      | NM_002488.3 | NDUFA2       | 5  | Homo sapiens B8; CD14         | 0.04150921 | 0.03798121 | 1.03893941 |
| AKR1A1      | NM_153326.1 | AKR1A1       | 1  | Homo sapiens ALR; ALDR1; I    | 0.04604736 | 0.04145065 | 1.03826435 |
| EBNA1BP2    | NM_006824.1 | EBNA1BP2     | 1  | Homo sapiens P40; NOBP; EI    | 0.01882269 | 0.01955598 | 1.03823325 |
| CHCHD2      | NM_016139.2 | CHCHD2       | 7  | Homo sapiens C7orf17          | 0.02156902 | 0.02199774 | 1.03753911 |
| FABP5L2     | XM_00172117 | FABP5L2      |    | PREDICTED: Homo sapiens fr    | 0.04201737 | 0.03839013 | 1.03351211 |
| YWHAH       | NM_003405.3 | YWHAH        | 22 | Homo sapiens YWHA1            | 0.03979099 | 0.03667677 | 1.03203572 |
| SNRPD2      | NM_177542.1 | SNRPD2       | 19 | Homo sapiens SMD2; SNRPD      | 0.03106476 | 0.02982407 | 1.0310281  |
| LOC442454   | XM_928047.1 | LOC442454    | X  | Homo sapiens ubiquinol-cyto   | 0.03309484 | 0.03139859 | 1.02739771 |
| ATP2B1      | NM_00100132 | ATP2B1       | 12 | Homo sapiens PMCA1; PMCA      | 0.00093674 | 0.00152146 | 706.059201 |
| CEND1       | NM_016564.2 | CEND1        | 11 | Homo sapiens FLJ90066; MG     | 1.3794E-07 | 1.7022E-06 | 352.769537 |
| ABCA3       | NM_001089.1 | ABCA3        | 16 | Homo sapiens ABC-C; EST11     | 0.00020194 | 0.00042287 | 288.410347 |
| ZNF219      | NM_016423.1 | ZNF219       | 14 | Homo sapiens ZFP219           | 0.01314166 | 0.01443477 | 259.453513 |
| SLMO2       | NM_016045.2 | SLMO2        | 20 | Homo sapiens C20orf45; PRE    | 0.02480467 | 0.02482447 | 242.393802 |
| SPRYD4      | NM_207344.1 | SPRYD4       | 12 | Homo sapiens DKFZp686N08      | 0.0006274  | 0.00108641 | 200.768846 |
| ARV1        | NM_022786.1 | ARV1         | 1  | Homo sapiens ARV1 homolog     | 0.00075081 | 0.00126247 | 188.445374 |
| MYO19       | NM_00103358 | MYO19        | 17 | Homo sapiens FLJ22865; MY     | 2.1689E-06 | 1.1893E-05 | 185.588421 |
| LOC128322   | XM_060943.1 | LOC128322    |    | PREDICTED: Homo sapiens s     | 0.00192334 | 0.00280229 | 185.116231 |
| FAS         | NM_152871.1 | FAS          | 10 | Homo sapiens CD95; APT1; f    | 0.00157518 | 0.00236128 | 173.718915 |
| TES         | NM_015641.2 | TES          | 7  | Homo sapiens DKFZp586B20      | 0.0001178  | 0.00027278 | 155.684411 |
| GRHL2       | NM_024915.1 | GRHL2        | 8  | Homo sapiens DFNA28; BOM      | 5.0791E-06 | 2.2598E-05 | 143.832684 |
| CORO6       | NM_032854.1 | CORO6        | 17 | Homo sapiens FLJ14871         | 8.8631E-05 | 0.00021771 | 84.6526229 |
| LOC10013145 | XM_00172348 | LOC10013145  |    | PREDICTED: Homo sapiens h     | 0.00028804 | 0.00056793 | 77.7988979 |
| EFR3B       | NM_014971.1 | EFR3B        | 2  | Homo sapiens EFR3 homolog     | 0.00775581 | 0.0092283  | 69.4176191 |
| RSF1        | NM_016578.3 | RSF1         | 11 | Homo sapiens HBXAP; p325;     | 3.4393E-06 | 1.6905E-05 | 64.5770184 |
| KLRC2       | NM_002260.3 | KLRC2        | 12 | Homo sapiens NKG2-C; CD1!     | 5.3929E-08 | 8.9616E-07 | 61.1618319 |
| WNT10B      | NM_003394.2 | WNT10B       | 12 | Homo sapiens WNT-12           | 5.0591E-05 | 0.00013802 | 58.8049003 |
| LOC652669   | XM_942246.1 | LOC652669    |    | PREDICTED: Homo sapiens s     | 0.00115367 | 0.00181762 | 53.4012134 |
| ARC         | NM_015193.3 | ARC          | 8  | Homo sapiens KIAA0278         | 6.9377E-08 | 1.0642E-06 | 50.923036  |
| DNAJC2      | NM_014377.1 | DNAJC2       | 7  | Homo sapiens MPP11; MPH0      | 0.00011913 | 0.00027507 | 49.6327792 |
| LRRC49      | NM_017691.2 | LRRC49       | 15 | Homo sapiens FLJ20156         | 1.7172E-08 | 4.4314E-07 | 48.7774929 |
| DNAJC1      | NM_022365.2 | DNAJC1       | 10 | Homo sapiens MGC131954; I     | 0.00018601 | 0.00039583 | 48.7160439 |
| GFPT2       | NM_005110.1 | GFPT2        | 5  | Homo sapiens GFAT2; FLJ10!    | 7.6327E-08 | 1.1293E-06 | 44.3158228 |
| DNA2        | NM_00108044 | DNA2         | 10 | Homo sapiens KIAA0083; DN     | 0.00105542 | 0.0016849  | 42.0813673 |
| PKNOX1      | NM_004571.3 | PKNOX1       | 21 | Homo sapiens PREP1; pkonx     | 8.2101E-05 | 0.00020418 | 39.927133  |
| UTS2        | NM_006786.2 | UTS2         | 1  | Homo sapiens UCN2; PRO10!     | 1.3E-06    | 8.124E-06  | 39.433322  |
| TM4SF18     | NM_138786.1 | TM4SF18      | 3  | Homo sapiens L6D              | 0.00014357 | 0.00032019 | 38.480313  |
| SCFD2       | NM_152540.3 | SCFD2        | 4  | Homo sapiens STXPB1L1; FL     | 0.01214633 | 0.01351064 | 37.7367237 |
| C14orf132   | NM_020215.2 | C14ORF132    | 14 | Homo sapiens DKFZp761F20      | 1.4071E-06 | 8.6517E-06 | 36.8344284 |
| FAR2        | NM_018099.3 | FAR2         | 12 | Homo sapiens FAR2; FLJ104!    | 3.381E-06  | 1.6656E-05 | 36.3573977 |
| KAT2B       | NM_003884.4 | KAT2B        |    | PREDICTED: Homo sapiens h     | 0.00014798 | 0.00032837 | 36.1176854 |
| MGC42630    | NM_175923.3 | MGC42630     | 3  | Homo sapiens KAT2B; P; P/C    | 0.01982909 | 0.02047069 | 35.7887167 |
| SEMA3C      | NM_006379.2 | SEMA3C       | 9  | Homo sapiens hypothetical p   | 0.00692435 | 0.00838221 | 35.4247189 |
| HEG1        | XM_087386.8 | HEG1         | 7  | Homo sapiens SEMAE; SemE      | 6.7352E-06 | 2.8033E-05 | 35.355159  |
| RCC1        | NM_001269.3 | RCC1         | 3  | Homo sapiens KIAA1237; ME     | 5.5864E-07 | 4.4237E-06 | 35.2615246 |
| C9orf82     | NM_024828.2 | C9ORF82      | 1  | Homo sapiens RCC1-I; CHC1     | 9.1519E-07 | 6.2782E-06 | 33.3697987 |
| LOC10013430 | XM_00172071 | LOC100134301 | 9  | Homo sapiens RP11-337A23.     | 8.6889E-05 | 0.00021427 | 32.309599  |
| FLJ20674    | NM_019086.2 | FLJ20674     |    | PREDICTED: Homo sapiens h     | 0.0001546  | 0.00034109 | 32.1068769 |
| NEBL        | NM_006393.1 | NEBL         | 12 | Homo sapiens hypothetical p   | 0.00254578 | 0.00354889 | 30.4961551 |
| SLC36A1     | NM_078483.2 | SLC36A1      | 10 | Homo sapiens MGC119747; I     | 1.5169E-05 | 5.2982E-05 | 30.4831912 |
| MYBBP1A     | NM_014520.1 | MYBBP1A      | 5  | Homo sapiens TRAMD3; PAT!     | 2.5877E-08 | 5.7479E-07 | 29.7143137 |
| CARD8       | NM_014959.1 | CARD8        |    | Homo sapiens PAP2; P160; F    | 0.00089528 | 0.00146306 | 28.7663913 |
| CHAF1A      | NM_005483.2 | CHAF1A       | 19 | Homo sapiens NDPP1; CARD!     | 0.00049743 | 0.00089619 | 28.516217  |
| KRT222      | NM_152349.1 | KRT222       | 19 | Homo sapiens MGC71229; C      | 0.0093934  | 0.01089173 | 27.7138869 |
| CHRNA10     | NM_020402.2 | CHRNA10      | 17 | Homo sapiens KA21; MGC45      | 2.8546E-05 | 8.6815E-05 | 27.2410844 |
| C14orf45    | NM_025057.1 | C14ORF45     | 11 | Homo sapiens cholinergic rec  | 0.00645842 | 0.00790985 | 26.9797719 |
| GPRIN1      | NM_052899.1 | GPRIN1       | 14 | Homo sapiens FLJ23189         | 6.8323E-05 | 0.00017528 | 26.7130657 |
| LOC644739   | XM_929457.1 | LOC644739    | X  | 5 Homo sapiens KIAA1893; GR   | 4.3444E-07 | 3.7115E-06 | 26.4904376 |
| ALDH3B1     | NM_00103001 | ALDH3B1      |    | PREDICTED: Homo sapiens s     | 0.00014722 | 0.00032701 | 26.4618875 |
| LOC10013393 | XM_00171643 | LOC100133930 |    | 11 Homo sapiens FLJ26433; AL! | 3.996E-05  | 0.00011372 | 26.3981689 |
| CD109       | NM_133493.1 | CD109        |    | PREDICTED: Homo sapiens s     | 0.0301343  | 0.02912839 | 26.0966311 |
| PSORS1C1    | NM_014068.1 | PSORS1C1     | 6  | Homo sapiens FLJ38569; DK     | 4.2921E-06 | 2.001E-05  | 25.5174359 |
| CCAR1       | NM_018237.2 | CCAR1        | 6  | Homo sapiens C6orf16; SEEk    | 0.00572496 | 0.00714216 | 25.099895  |
| SNCG        | NM_003087.1 | SNCG         | 12 | Homo sapiens cDNA FLJ3377     | 2.9875E-08 | 6.1822E-07 | 25.0326825 |
| LAMP3       | NM_014398.2 | LAMP3        | 10 | Homo sapiens RP11-437A18.     | 0.00553443 | 0.00693404 | 24.7111943 |
| PGF         | NM_002632.4 | PGF          | 10 | Homo sapiens BCSG1; SR        | 2.8047E-07 | 2.7404E-06 | 23.9373623 |
| LOC442442   | XM_00171989 | LOC442442    | X  | 3 Homo sapiens TSC403; DC-L   | 1.2239E-06 | 7.7927E-06 | 23.8372707 |
| APOBEC3B    | NM_004900.3 | APOBEC3B     | 14 | Homo sapiens PGFL; PIGF-2;    | 0.0004367  | 0.00080445 | 23.7781933 |
|             |             |              |    | PREDICTED: Homo sapiens 6     | 0.01305254 | 0.01435305 | 23.5118872 |
|             |             |              |    | 22 Homo sapiens FLJ21201; AP! | 0.00035238 | 0.00067242 | 23.1769613 |

### 5.0 Upreg

|             |             |             |    |                 |                              |            |            |            |
|-------------|-------------|-------------|----|-----------------|------------------------------|------------|------------|------------|
| ESCO2       | NM_00101742 | ESCO2       | 8  | Homo sapiens    | EFO2; RBS; 2                 | 0.00283525 | 0.00388573 | 22.2939653 |
| KIAA0513    | NM_014732.2 | KIAA0513    | 16 | Homo sapiens    | KIAA0513 (KI                 | 1.3622E-06 | 8.4348E-06 | 21.9958975 |
| CHMP7       | NM_152272.2 | CHMP7       | 8  | Homo sapiens    | MGC29816                     | 0.00141484 | 0.00216004 | 21.6198299 |
| IL1RAPL1    | NM_014271.2 | IL1RAPL1    | X  | Homo sapiens    | MRX34; IL1RA                 | 0.00061608 | 0.00106997 | 20.6423458 |
| TXNRD2      | NM_145748.1 | TXNRD2      | 22 | Homo sapiens    | TRXR2; TR3; 9                | 0.00373793 | 0.00494445 | 20.4563356 |
| TBC1D22A    | NM_014346.1 | TBC1D22A    | 22 | Homo sapiens    | C22orf4; HSC                 | 0.00024801 | 0.00050198 | 20.3598266 |
| HM13        | NM_030789.2 | HM13        | 20 | Homo sapiens    | MSTP086; H13                 | 0.00022022 | 0.00045389 | 19.8688203 |
| FAM149A     | NM_015398.1 | FAM149A     | 4  | Homo sapiens    | DKFZP564J10                  | 0.01400581 | 0.0152182  | 19.4231751 |
| LOC400836   | XR_018904.2 | LOC400836   |    |                 | PREDICTED: Homo sapiens n    | 0.05615251 | 0.04888689 | 19.3470847 |
| IVD         | NM_002225.2 | IVD         | 15 | Homo sapiens    | ACAD2                        | 0.00133159 | 0.00205224 | 19.1944749 |
| CHSY3       | NM_175856.4 | CHSY3       | 5  | Homo sapiens    | CSS3; CHSY2                  | 4.3874E-06 | 2.0346E-05 | 19.0984257 |
| SLC6A16     | NM_014037.2 | SLC6A16     | 19 | Homo sapiens    | NTT5                         | 0.01002731 | 0.0114991  | 18.7097528 |
| TFAP2E      | NM_178548.2 | TFAP2E      | 1  | Homo sapiens    | MGC49007; AI                 | 0.01395272 | 0.0151699  | 18.4810522 |
| FAM164A     | NM_016010.1 | FAM164A     | 8  | Homo sapiens    | CGI-62                       | 0.00011231 | 0.00026257 | 18.4012626 |
| ENPP5       | NM_021572.4 | ENPP5       | 6  | Homo sapiens    | KIAA0879                     | 8.0287E-09 | 2.7844E-07 | 18.2869775 |
| C12orf26    | NM_032230.1 | C12ORF26    | 12 | Homo sapiens    | DKFZP564J10                  | 4.72E-08   | 8.1683E-07 | 18.2096942 |
| PROM2       | NM_144707.1 | PROM2       | 2  | Homo sapiens    | PROM-2; MGC                  | 0.0034044  | 0.00455685 | 17.8902811 |
| METTL4      | NM_022840.2 | METTL4      | 18 | Homo sapiens    | MGC117235; I                 | 0.00059863 | 0.00104525 | 17.8322154 |
|             | Hs.444999   | HS.444999   | 15 | BX114974        | NCI_CGAP_Kid3 H              | 0.03630364 | 0.03397633 | 17.5035544 |
| FER1L4      | NR_001442.1 | FER1L4      |    |                 | Homo sapiens                 | 0.00015498 | 0.00034158 | 16.900433  |
|             | Hs.435263   | HS.435263   | 13 | NISC_gj03f04.y1 | NCI_CGAP                     | 0.00042564 | 0.00078771 | 16.6932189 |
| ZNF286C     | NR_024508.1 | ZNF286C     |    |                 | Homo sapiens zinc finger 286 | 0.03053365 | 0.02942041 | 16.5551732 |
| FAM46C      | NM_017709.2 | FAM46C      | 1  | Homo sapiens    | FLJ20202                     | 1.9675E-05 | 6.5168E-05 | 16.4130436 |
| TMEM59L     | NM_012109.2 | TMEM59L     | 19 | Homo sapiens    | BSMAP; C19or                 | 1.7463E-08 | 4.4801E-07 | 16.3777779 |
| GPD2        | NM_000408.2 | GPD2        | 2  | Homo sapiens    | mGPDH; GDH                   | 0.00097004 | 0.0015654  | 16.0001875 |
| SPATA7      | NM_018418.1 | SPATA7      | 14 | Homo sapiens    | MGC102934; I                 | 5.2265E-08 | 8.7848E-07 | 15.9695991 |
| TMEM166     | NM_032181.1 | TMEM166     | 2  | Homo sapiens    | FLJ13391                     | 0.00705533 | 0.00851609 | 15.6843596 |
| C5orf34     | NM_198566.1 | C5ORF34     | 5  | Homo sapiens    | MGC46448; FL                 | 0.04052337 | 0.0372072  | 15.5290521 |
| BAPX1       | NM_001189.2 | BAPX1       | 4  | Homo sapiens    | NKX3B; NKX3                  | 7.7386E-05 | 0.00019433 | 15.1145035 |
| SRPX2       | NM_014467.1 | SRPX2       | X  | Homo sapiens    | SRPUL; RESD                  | 0.00011727 | 0.00027176 | 14.9544541 |
| LOC648982   | XM_938059.1 | LOC648982   |    |                 | PREDICTED: Homo sapiens h    | 0.0016732  | 0.00248614 | 14.7331505 |
| SERPINE1    | NM_000602.1 | SERPINE1    | 7  | Homo sapiens    | PAI; PAI-1; PA               | 5.8326E-07 | 4.557E-06  | 14.3894131 |
| HMG2        | NM_00101588 | HMG2        | 12 | Homo sapiens    | HMG1; HMG2-C; HMG            | 0.00011945 | 0.00027565 | 14.3200071 |
| SIM2        | NM_005069.2 | SIM2        | 21 | Homo sapiens    | MGC119447; 9                 | 0.01984316 | 0.02047558 | 13.8241474 |
| PARVB       | NM_00100382 | PARVB       | 22 | Homo sapiens    | CGI-56                       | 0.04820748 | 0.04306378 | 13.7448996 |
| MYOM3       | NM_152372.2 | MYOM3       | 1  | Homo sapiens    | RP11-293P20                  | 1.2126E-06 | 7.7493E-06 | 13.6549151 |
| SLC22A17    | NM_016609.3 | SLC22A17    | 14 | Homo sapiens    | BOIT; BOCT; h                | 4.5853E-07 | 3.8389E-06 | 13.6399151 |
| LOC643233   | XM_926592.1 | LOC643233   |    |                 | PREDICTED: Homo sapiens s    | 2.9993E-06 | 1.5203E-05 | 13.5465192 |
| IRF4        | NM_002460.1 | IRF4        | 6  | Homo sapiens    | MUM1; LSIRF                  | 0.01038344 | 0.01184866 | 13.3726437 |
| ZNF564      | NM_144976.2 | ZNF564      | 19 | Homo sapiens    | MGC26914                     | 8.9958E-05 | 0.0002201  | 13.3310864 |
| BEND3       | NM_00108045 | BEND3       | 6  | Homo sapiens    | RP11-5919.2                  | 3.7839E-05 | 0.0001091  | 13.0614762 |
| CCDC18      | NM_206886.2 | CCDC18      | 1  | Homo sapiens    | dJ717I23.1; N                | 0.00014063 | 0.0003151  | 12.9338726 |
| CRISPLD2    | NM_031476.1 | CRISPLD2    | 16 | Homo sapiens    | DKFZP434B04                  | 2.1789E-11 | 1.2745E-08 | 12.7507643 |
|             | Hs.372654   | HS.372654   | 10 | Homo sapiens    | cDNA: FLJ230                 | 0.00121244 | 0.0018959  | 12.6478666 |
| PDLIM7      | NM_005451.3 | PDLIM7      | 5  | Homo sapiens    | PDZ and LIM c                | 0.00011449 | 0.00026681 | 12.5509172 |
| SYK         | NM_003177.3 | SYK         | 9  | Homo sapiens    | spleen tyrosin               | 0.00034039 | 0.00065338 | 12.3612003 |
| NAPEPLD     | NM_198990.3 | NAPEPLD     | 7  | Homo sapiens    | FMP30; NAPE-                 | 3.9715E-05 | 0.0001131  | 12.2718662 |
| FGFR10P     | NM_007045.2 | FGFR10P     | 6  | Homo sapiens    | FOP                          | 0.00039413 | 0.00073906 | 12.1980126 |
| TMX4        | NM_021156.2 | TMX4        | 20 | Homo sapiens    | DJ971N18.2; I                | 1.5501E-05 | 5.395E-05  | 12.0419008 |
| TCIRG1      | NM_006019.2 | TCIRG1      | 11 | Homo sapiens    | ATP6N1C; OC-                 | 4.3684E-07 | 3.7248E-06 | 11.9423821 |
|             | Hs.573264   | HS.573264   | 6  | BX104737        | Soares_fetal_hear            | 0.00926852 | 0.01076542 | 11.7992145 |
| LOC10012847 | XM_00171568 | LOC10012847 |    |                 | PREDICTED: Homo sapiens h    | 0.00339548 | 0.0045463  | 11.7967963 |
| UNC5C       | NM_003728.2 | UNC5C       | 4  | Homo sapiens    | UNC5H3                       | 0.03269158 | 0.03110006 | 11.7476916 |
| ESAM        | NM_138961.1 | ESAM        | 11 | Homo sapiens    | W117m                        | 2.4191E-07 | 2.4652E-06 | 11.5522497 |
| LOC648605   | XM_939593.1 | LOC648605   |    |                 | PREDICTED: Homo sapiens s    | 0.02607306 | 0.02584039 | 11.4855277 |
| VPS39       | NM_015289.2 | VPS39       | 15 | Homo sapiens    | VAM6; FLJ465                 | 0.00355224 | 0.00473165 | 11.4198255 |
| DYNC2H1     | NM_00108046 | DYNC2H1     | 11 | Homo sapiens    | DYH1B; FLJ11                 | 1.3372E-05 | 4.7851E-05 | 11.3437187 |
| SMAD6       | NM_005585.2 | SMAD6       | 15 | Homo sapiens    | MADH6; HsT1                  | 2.0183E-06 | 1.1294E-05 | 11.0701901 |
| PTPN9       | NM_002833.2 | PTPN9       |    |                 | PREDICTED: Homo sapiens p    | 0.00039315 | 0.00073755 | 10.9901801 |
| MIR185      | NR_029706.1 | MIR185      |    |                 | Homo sapiens microRNA 185    | 0.00112321 | 0.00177632 | 10.9671117 |
| CHD5        | NM_015557.1 | CHD5        | 1  | Homo sapiens    | KIAA0444; DK                 | 3.0425E-07 | 2.9111E-06 | 10.9522789 |
| HSH2D       | NM_032855.2 | HSH2D       | 19 | Homo sapiens    | HSH2; ALX; FL                | 2.8362E-06 | 1.4587E-05 | 10.8056892 |
| CAMK2D      | NM_172115.1 | CAMK2D      | 4  | Homo sapiens    | MGC44911; C                  | 1.4602E-08 | 4.0289E-07 | 10.771715  |
| CPA4        | NM_016352.2 | CPA4        | 7  | Homo sapiens    | CPA3                         | 8.5609E-12 | 6.8284E-09 | 10.7106561 |
|             | Hs.539841   | HS.539841   | 14 | ny62f03.s1      | NCI_CGAP_GCB1                | 0.03937341 | 0.03636828 | 10.659012  |
| LOC653717   | XM_496034.2 | LOC653717   |    |                 | PREDICTED: Homo sapiens s    | 0.00331605 | 0.00445627 | 10.6327877 |
| WFDC3       | NM_080614.1 | WFDC3       | 20 | Homo sapiens    | WAP14; dJ447                 | 0.00030735 | 0.00060033 | 10.5857317 |
| ZNF121      | NM_00100872 | ZNF121      | 19 | Homo sapiens    | ZNF20; ZHC3                  | 0.00664883 | 0.00810347 | 10.4954896 |
| ZNF57       | NM_173480.1 | ZNF57       | 19 | Homo sapiens    | ZNF424                       | 0.00646084 | 0.00791171 | 10.3508134 |
| ZNF767      | NM_024910.1 | ZNF767      | 7  | Homo sapiens    | MGC51818; FL                 | 0.04441184 | 0.04023433 | 10.2495774 |

## 5.0 Upreg

|             |                          |                                 |            |            |            |
|-------------|--------------------------|---------------------------------|------------|------------|------------|
| TMTC4       | NM_032813.2 TMTC4        | 13 Homo sapiens FLJ22153; FLJ   | 0.0002013  | 0.00042183 | 10.1463738 |
| GUSBL2      | NM_206910.1 GUSBL2       | 6 Homo sapiens b55C20.2; SM     | 0.00018384 | 0.00039189 | 10.120938  |
| FAM125B     | NM_00101170 FAM125B      | 9 Homo sapiens FLJ00001; C9t    | 0.00081461 | 0.00135341 | 10.0530604 |
| B3GNT5      | NM_032047.3 B3GNT5       | 3 Homo sapiens beta3Gn-T5; E    | 0.00010305 | 0.00024582 | 9.94863162 |
|             | Hs.202140 HS.202140      | BX114021 NCI_CGAP_Lu24 t        | 4.3252E-07 | 3.706E-06  | 9.93997546 |
| KIAA1333    | NM_017769.2 KIAA1333     | 14 Homo sapiens G2E3; FLJ203    | 0.00012493 | 0.00028628 | 9.915314   |
| LOC253039   | NR_024408.1 LOC253039    | 9 Homo sapiens hypothetical Li  | 0.00011829 | 0.00027355 | 9.85117779 |
| GCNT3       | NM_004735.1 GCNT3        | 15 Homo sapiens C2/4GnT; GnT    | 7.7134E-07 | 5.5337E-06 | 9.75446535 |
| SNORA17     | NR_002958.1 SNORA17      | 9 Homo sapiens ACA17            | 0.03346592 | 0.03170608 | 9.66888467 |
| MIR330      | NR_029886.1 MIR330       | Homo sapiens microRNA 330       | 0.02525996 | 0.02518533 | 9.46127135 |
| LOC10013251 | XM_00172519 LOC100132510 | PREDICTED: Homo sapiens s       | 0.00508233 | 0.00644025 | 9.35323663 |
| ARL17P1     | NM_016632.1 ARL17P1      | 17 Homo sapiens ARF1P2; ARL1    | 0.02622443 | 0.02597574 | 9.31566395 |
| FBN3        | NM_032447.3 FBN3         | 19 Homo sapiens KIAA1776        | 0.0035907  | 0.00477056 | 9.30737146 |
| NPHP4       | NM_015102.2 NPHP4        | 1 Homo sapiens KIAA0673; SL     | 0.00042839 | 0.00079181 | 9.21609185 |
| NFRKB       | NM_006165.2 NFRKB        | 11 Homo sapiens DKFZp547B20     | 1.6622E-05 | 5.7104E-05 | 9.17241839 |
| GINS4       | NM_032336.1 GINS4        | 8 Homo sapiens MGC14799; SI     | 0.02068172 | 0.02121115 | 9.16581111 |
| CCDC92      | NM_025140.1 CCDC92       | 12 Homo sapiens FLJ22471        | 2.6539E-07 | 2.6193E-06 | 9.00288285 |
| PKP3        | NM_007183.2 PKP3         | 11 Homo sapiens plakophilin 3 ( | 3.1486E-06 | 1.5741E-05 | 8.89068786 |
| MSL1        | NM_00101224 MSL1         | 17 Homo sapiens DKFZp686J17.    | 8.3142E-05 | 0.00020648 | 8.78980295 |
| LOC652051   | XM_945171.1 LOC652051    | PREDICTED: Homo sapiens h       | 0.00163561 | 0.00243979 | 8.73917199 |
| STARD8      | NM_014725.2 STARD8       | X Homo sapiens DKFZp686H16      | 0.02511461 | 0.02508031 | 8.69428169 |
| SLIT2       | NM_004787.1 SLIT2        | 4 Homo sapiens Slit-2; SLIL3;   | 5.6292E-05 | 0.00015022 | 8.56699675 |
| CDCA1       | NM_145697.1 CDCA1        | 1 Homo sapiens NUF2R            | 5.3672E-07 | 4.3046E-06 | 8.35236575 |
| HIST2H2AA3  | NM_003516.2 HIST2H2AA3   | 1 Homo sapiens H2a-615; H2A     | 6.6205E-09 | 2.4103E-07 | 8.26992603 |
| SNORA28     | NR_002964.1 SNORA28      | 14 Homo sapiens ACA28           | 0.01037209 | 0.01184033 | 8.22959911 |
|             | Hs.20255 HS.20255        | 2 AV652851 GLC Homo sapien:     | 0.00771627 | 0.00918998 | 8.21601755 |
| DNER        | NM_139072.2 DNER         | 2 Homo sapiens bet; UNQ26       | 3.7859E-09 | 1.7483E-07 | 8.2018858  |
| PLA2G15     | NM_012320.3 PLA2G15      | 16 Homo sapiens DKFZp564A01     | 3.1879E-07 | 3.0011E-06 | 8.1116058  |
| COL1A1      | NM_000088.2 COL1A1       | 17 Homo sapiens O14             | 3.7769E-07 | 3.3405E-06 | 8.03860365 |
| LOC10013172 | XM_00172015 LOC10013172  | 4 PREDICTED: Homo sapiens h     | 1.423E-06  | 8.713E-06  | 8.03483836 |
| METT10D     | NM_024086.2 METT10D      | 17 Homo sapiens MGC3329         | 0.0014689  | 0.00223055 | 7.96871658 |
| PITPNA      | NM_006224.2 PITPNA       | 17 Homo sapiens PITPN; VIB1A;   | 7.8816E-06 | 3.1534E-05 | 7.88777975 |
| GSTT2B      | NM_00108084 GSTT2B       | 22 Homo sapiens MGC87963; G     | 4.5319E-05 | 0.00012615 | 7.87613799 |
| FRYL        | XM_945291.1 FRYL         | 4 Homo sapiens FLJ16177; KIA    | 9.7371E-07 | 6.5921E-06 | 7.84493206 |
| ZNF805      | NM_00102356 ZNF805       | 19 Homo sapiens DKFZp686P08     | 0.00081945 | 0.00135965 | 7.77046773 |
| BBS4        | NM_033028.2 BBS4         | 15 Homo sapiens Bardet-Biedl s  | 1.5392E-05 | 5.3635E-05 | 7.65156816 |
| PPP1R9A     | XM_934519.1 PPP1R9A      | 7 PREDICTED: Homo sapiens p     | 0.01628951 | 0.01731155 | 7.64746935 |
| BMP8B       | NM_001720.3 BMP8B        | 1 Homo sapiens BMP8; MGC13      | 5.978E-05  | 0.00015713 | 7.63107548 |
| LOC731954   | XR_015662.2 LOC731954    | PREDICTED: Homo sapiens s       | 0.00019597 | 0.00041323 | 7.5849759  |
| WDR91       | NM_014149.2 WDR91        | 7 Homo sapiens HSPC049          | 0.00038023 | 0.00071776 | 7.44967611 |
| FUT4        | NM_002033.2 FUT4         | 11 Homo sapiens FCT3A; ELFT;    | 1.0906E-06 | 7.1622E-06 | 7.44398891 |
| SNN         | NM_003498.3 SNN          | 16 Homo sapiens stannin (SNN)   | 1.4733E-05 | 5.1789E-05 | 7.42421272 |
| EFNB1       | NM_004429.3 EFNB1        | X Homo sapiens MGC8782; LEF     | 0.00385178 | 0.00507745 | 7.41413873 |
| ANKRD33     | NM_182608.2 ANKRD33      | 12 Homo sapiens DKFZp686O16     | 0.0015796  | 0.0023671  | 7.35775681 |
|             | Hs.22689 HS.22689        | Homo sapiens mRNA; cDNA I       | 8.7031E-05 | 0.0002145  | 7.24577563 |
| RNF217      | NM_152553.2 RNF217       | 6 Homo sapiens C6orf172; MG     | 4.2641E-05 | 0.00011992 | 7.20066061 |
| WDR62       | NM_173636.3 WDR62        | 19 Homo sapiens FLJ33298; DK    | 0.01305667 | 0.01435579 | 7.19185915 |
| GALNT14     | NM_024572.2 GALNT14      | 2 Homo sapiens FLJ12691; Gal    | 0.01882893 | 0.01956015 | 7.04835545 |
| DNAJB12     | NM_00100276 DNAJB12      | 10 Homo sapiens DJ10; DKFZp5    | 0.00024034 | 0.00048927 | 6.96784569 |
| USH1G       | NM_173477.2 USH1G        | 17 Homo sapiens ANKS4A; FLJ3    | 0.01028938 | 0.01175202 | 6.96041596 |
| LOC10012929 | XR_038229.1 LOC100129293 | PREDICTED: Homo sapiens n       | 0.00717661 | 0.00864226 | 6.95201803 |
| KIAA1881    | Hs.567652 KIAA1881       | PREDICTED: Homo sapiens K       | 0.00067522 | 0.00115306 | 6.93751    |
| C1orf151    | NM_00103236 C1ORF151     | 1 Homo sapiens RP5-1056L3.2     | 0.0153799  | 0.01648061 | 6.87931272 |
| WBSCR16     | XM_933544.1 WBSCR16      | 7 Homo sapiens MGC16868; Ki     | 2.98E-06   | 1.5148E-05 | 6.87305569 |
| LOC729887   | XR_040889.1 LOC729887    | PREDICTED: Homo sapiens h       | 3.6767E-05 | 0.00010678 | 6.85236562 |
| LOC10013038 | XM_00171847 LOC100130387 | PREDICTED: Homo sapiens s       | 0.02215857 | 0.0225257  | 6.81851108 |
| PRRT1       | NM_030651.2 PRRT1        | 6 Homo sapiens C6orf31; NG5     | 0.04930172 | 0.04382708 | 6.81052714 |
| LOC649445   | XM_00172079 LOC649445    | 14 PREDICTED: Homo sapiens s    | 0.01599762 | 0.01703229 | 6.78360876 |
| MIR599      | NR_030329.1 MIR599       | Homo sapiens microRNA 599       | 0.00222432 | 0.00317491 | 6.74764556 |
| STXBP4      | NM_178509.5 STXBP4       | 17 Homo sapiens MGC149829; I    | 0.05446143 | 0.04763204 | 6.71624867 |
| C9orf25     | NM_147202.1 C9ORF25      | 9 Homo sapiens bA573M23.5;      | 1.9468E-05 | 6.4676E-05 | 6.6978486  |
| USP33       | NM_201626.1 USP33        | 1 Homo sapiens MGC16868; Ki     | 0.00503996 | 0.00639304 | 6.69063635 |
| BMP1        | NM_006129.2 BMP1         | 8 Homo sapiens PCOLC; FLJ44     | 0.00019576 | 0.00041297 | 6.67932013 |
| HIST1H2BD   | NM_138720.1 HIST1H2BD    | 6 Homo sapiens H2B.1B; HIRIF    | 1.1582E-12 | 2.5405E-09 | 6.66888487 |
| PLAT        | NM_000930.2 PLAT         | 8 Homo sapiens T-PA; DKFZp6     | 0.00599047 | 0.00742588 | 6.65706053 |
| LOC649025   | XM_938110.1 LOC649025    | PREDICTED: Homo sapiens h       | 1.8609E-08 | 4.6918E-07 | 6.55751183 |
| RBMS2       | NM_002898.2 RBMS2        | 12 Homo sapiens SCR3            | 8.1774E-05 | 0.00020343 | 6.51319423 |
| LOC651511   | XM_940673.1 LOC651511    | PREDICTED: Homo sapiens s       | 0.05188647 | 0.04569885 | 6.44612849 |
| LRIG1       | NM_015541.2 LRIG1        | 3 Homo sapiens LIG-1; LIG1; I   | 7.656E-07  | 5.5061E-06 | 6.43712141 |
| ZNF763      | NM_00101275 ZNF763       | 19 Homo sapiens ZNF; ZNF440L    | 0.01776285 | 0.01862689 | 6.42515313 |



5.0 Upreg

|             |                         |   |                                 |            |            |            |
|-------------|-------------------------|---|---------------------------------|------------|------------|------------|
| SEMA6A      | NM_020796.2 SEMA6A      |   | 5 Homo sapiens VIA; SEMAQ; ;    | 3.8E-09    | 1.7456E-07 | 6.41690518 |
| FLJ36848    | NM_00100152 FLJ36848    |   | 2 PREDICTED: Homo sapiens h     | 0.00617864 | 0.00763111 | 6.40779642 |
| LOC646010   | XM_933332.1 LOC646010   |   | 19 PREDICTED: Homo sapiens h    | 0.00584928 | 0.0072745  | 6.40159592 |
| ABCF3       | NM_018358.1 ABCF3       |   | 3 Homo sapiens EST201864; F     | 1.3248E-05 | 4.7521E-05 | 6.39679309 |
| MSI2        | NM_170721.1 MSI2        |   | 17 Homo sapiens FLJ36569; MS    | 2.7648E-05 | 8.4819E-05 | 6.35792698 |
| LIFR        | NM_002310.3 LIFR        |   | 5 Homo sapiens CD118; STWS      | 0.00048295 | 0.00087459 | 6.35593575 |
| FAM75B      | NM_00109880 FAM75B      |   | 9 Homo sapiens C9orf36B; bA     | 6.3536E-05 | 0.00016493 | 6.3455582  |
| LOC441714   | XR_019458.2 LOC441714   |   | PREDICTED: Homo sapiens n       | 0.00024756 | 0.00050128 | 6.32363836 |
| RAB6B       | NM_016577.2 RAB6B       |   | 3 Homo sapiens RAB6B, memb      | 2.2915E-05 | 7.3297E-05 | 6.24191083 |
| TMLHE       | NM_018196.1 TMLHE       | X | Homo sapiens FLJ10727; BB       | 0.02513346 | 0.02509057 | 6.23455227 |
| LEPR        | NM_002303.3 LEPR        |   | 1 Homo sapiens OBR; CD295       | 0.00047661 | 0.00086561 | 6.16800463 |
|             | Hs.550799 HS.550799     |   | 1 UI-CF-FN0-afv-g-21-0-UI.s1    | 0.00956841 | 0.01105521 | 6.15205744 |
| CD40        | NM_001250.3 CD40        |   | 20 Homo sapiens TNFRSF5; p50    | 9.5707E-05 | 0.00023146 | 6.14811729 |
| PLA2G10     | NM_003561.1 PLA2G10     |   | 16 Homo sapiens GXPLA2; SPLA    | 4.4709E-08 | 7.8771E-07 | 6.12747105 |
| SNORD110    | NR_003078.1 SNORD110    |   | 20 Homo sapiens HBII-55         | 0.05249264 | 0.04613547 | 6.08835605 |
| HPCAL4      | NM_016257.2 HPCAL4      |   | 1 Homo sapiens DKFZp761G12      | 9.2204E-09 | 3.076E-07  | 6.05055664 |
| LOC10013129 | XM_00171862 LOC10013129 |   | 12 PREDICTED: Homo sapiens s    | 0.00484709 | 0.00617966 | 6.03872699 |
|             | Hs.548302 HS.548302     |   | 8 AU253506 human favorable i    | 0.00136423 | 0.00209444 | 6.01821306 |
| C6orf57     | NM_145267.2 C6ORF57     |   | 6 Homo sapiens MGC104225        | 0.01740453 | 0.01833441 | 6.01383718 |
| LIMCH1      | NM_014988.1 LIMCH1      |   | 4 Homo sapiens DKFZp686B24      | 0.00079457 | 0.00132439 | 5.98301762 |
| SLC2A3      | NM_006931.1 SLC2A3      |   | 12 Homo sapiens GLUT3; FLJ90    | 1.0018E-10 | 2.6635E-08 | 5.97173311 |
| FANCA       | NM_000135.2 FANCA       |   | 16 Homo sapiens FAA; FA; FA1;   | 0.00047984 | 0.00087021 | 5.95398424 |
| FAM114A1    | NM_138389.1 FAM114A1    |   | 4 Homo sapiens Noxp20           | 0.00055976 | 0.00099158 | 5.93347503 |
| OR7E156P    | NR_002171.1 OR7E156P    |   | 13 Homo sapiens olfactory recep | 0.0013128  | 0.00202755 | 5.8893548  |
| MIR21       | NR_029735.1 MIR21       |   | Homo sapiens microRNA 21 (      | 0.0002339  | 0.0004785  | 5.8869256  |
| RFESD       | NM_173362.2 RFESD       |   | 5 Homo sapiens Rieske (Fe-S)    | 0.02211434 | 0.02248594 | 5.86342029 |
| HYAL3       | NM_003549.2 HYAL3       |   | 3 Homo sapiens LUCA14; Minn     | 5.0339E-07 | 4.1124E-06 | 5.79452373 |
| KIAA1345    | XM_944553.1 KIAA1345    |   | PREDICTED: Homo sapiens k       | 0.00514558 | 0.00650725 | 5.73708669 |
| LOC646783   | XM_929735.1 LOC646783   |   | 6 PREDICTED: Homo sapiens h     | 0.03376734 | 0.03194336 | 5.71702588 |
| BEGAIN      | NM_020836.2 BEGAIN      |   | 14 Homo sapiens KIAA1446; BE    | 1.3305E-08 | 3.7658E-07 | 5.69579329 |
| TMPRSS12    | NM_182559.1 TMPRSS12    |   | 12 Homo sapiens MGC57341        | 0.00923424 | 0.0107384  | 5.68579985 |
| HERC6       | NM_00101300 HERC6       |   | 4 Homo sapiens FLJ20637         | 0.00294139 | 0.00401364 | 5.68176992 |
| OVOL2       | NM_021220.2 OVOL2       |   | 20 Homo sapiens EUROIMAGE56     | 0.000162   | 0.00035429 | 5.67619492 |
| MGC18216    | XM_927732.1 MGC18216    |   | 15 PREDICTED: Homo sapiens h    | 2.4445E-06 | 1.3038E-05 | 5.66452105 |
| C7orf63     | NM_024788.2 C7ORF63     |   | 7 Homo sapiens chromosome 7     | 0.00257554 | 0.0035841  | 5.66331899 |
| DOK4        | NM_018110.2 DOK4        |   | 16 Homo sapiens FLJ10488        | 3.8067E-05 | 0.00010954 | 5.57664102 |
| CPNE7       | NM_153639.3 CPNE7       |   | 16 Homo sapiens MGC34192        | 8.9401E-05 | 0.00021911 | 5.51598997 |
| SERPINA3    | NM_001085.4 SERPINA3    |   | 14 Homo sapiens GIG24; GIG25    | 0.00953552 | 0.01103173 | 5.45879871 |
| RNF207      | NM_207396.2 RNF207      |   | 1 Homo sapiens FLJ46380; FLJ    | 0.04108039 | 0.03763986 | 5.44131869 |
| APOLD1      | NM_030817.1 APOLD1      |   | 12 Homo sapiens VERGE; DKFZI    | 1.7446E-05 | 5.9261E-05 | 5.42789136 |
| LOC730323   | XM_00172209 LOC730323   |   | 7 PREDICTED: Homo sapiens h     | 1.219E-06  | 7.773E-06  | 5.42357353 |
| GPR101      | NM_054021.1 GPR101      | X | Homo sapiens GPCR6              | 0.03787916 | 0.03521794 | 5.41191556 |
| MPV17L2     | NM_032683.1 MPV17L2     |   | 19 Homo sapiens MGC110861; I    | 0.00015042 | 0.00033287 | 5.40862294 |
| ZMIZ2       | NM_031449.3 ZMIZ2       |   | 7 Homo sapiens DKFZp761I21:     | 2.4551E-09 | 1.4265E-07 | 5.3837727  |
| FAM13A      | NM_014883.2 FAM13A      |   | 4 Homo sapiens FLJ34562; MG     | 0.00034848 | 0.00066599 | 5.36346119 |
| CCNT2       | NM_001241.2 CCNT2       |   | 2 Homo sapiens FLJ90560; MG     | 0.00426689 | 0.0055373  | 5.32378201 |
| FLJ90757    | NM_00100433 FLJ90757    |   | 17 PREDICTED: Homo sapiens h    | 1.6115E-08 | 4.2461E-07 | 5.31520982 |
| TCEAL5      | NM_00101297 TCEAL5      | X | Homo sapiens transcription e    | 0.00954681 | 0.01103752 | 5.31467064 |
| ARHGAP11A   | NM_014783.2 ARHGAP11A   |   | 15 Homo sapiens GAP (1-12); K   | 0.00084812 | 0.00139693 | 5.30945423 |
| CKMT1B      | NM_020990.3 CKMT1B      |   | 15 Homo sapiens UMTCK; CKMT     | 2.9036E-09 | 1.5164E-07 | 5.30545549 |
| IFIT2       | NM_001547.3 IFIT2       |   | 10 Homo sapiens GARG-39; G10    | 0.01281892 | 0.0141298  | 5.28744922 |
| LOC728285   | XM_937100.1 LOC728285   |   | 17 PREDICTED: Homo sapiens s    | 2.6393E-09 | 1.4294E-07 | 5.25771889 |
| FGD1        | NM_004463.2 FGD1        | X | Homo sapiens ZFYVE3; AAS;       | 0.00529683 | 0.00667544 | 5.24660641 |
| WDR7        | NM_015285.2 WDR7        |   | 18 Homo sapiens TRAG; KIAA05    | 0.02347994 | 0.02368783 | 5.15521096 |
| TIFA        | NM_052864.2 TIFA        |   | 4 Homo sapiens MGC20791; T      | 0.02962078 | 0.02870791 | 5.12560502 |
| LOC650034   | XM_939124.1 LOC650034   |   | PREDICTED: Homo sapiens s       | 0.00247345 | 0.00346622 | 5.1143714  |
| LOC10013201 | XM_00171475 LOC10013201 |   | 17 PREDICTED: Homo sapiens h    | 0.04427502 | 0.04011866 | 5.11284577 |
| HSD11B2     | NM_000196.2 HSD11B2     |   | 16 Homo sapiens AME1; HSD2;     | 0.00232162 | 0.0032929  | 5.11100898 |
| C8orf83     | NR_015339.1 C8ORF83     |   | 8 Homo sapiens FLJ40637; DK     | 0.00014238 | 0.00031828 | 5.09368003 |
| SNORD60     | NR_002736.1 SNORD60     |   | 16 Homo sapiens RNU60; U60      | 0.00433126 | 0.00560344 | 5.08022792 |
| METTL10     | NM_212554.2 METTL10     |   | 10 Homo sapiens methyltransfer  | 0.00130851 | 0.00202306 | 5.05425706 |
| ZHX3        | NM_015035.3 ZHX3        |   | 20 Homo sapiens KIAA0395; TI    | 6.0425E-06 | 2.5774E-05 | 5.03765692 |
| AP2A2       | NM_012305.2 AP2A2       |   | 11 Homo sapiens CLAPA2; HYPJ    | 0.00064292 | 0.00110782 | 5.02852474 |
| TCTA        | NM_022171.1 TCTA        |   | 3 Homo sapiens T-cell leukemia  | 3.5077E-08 | 6.9005E-07 | 5.01314508 |
| CTGF        | NM_001901.2 CTGF        |   | 6 Homo sapiens CCN2; MGC10      | 2.0752E-12 | 3.6415E-09 | 4.974264   |
| LOC10012970 | XR_036903.1 LOC10012970 |   | PREDICTED: Homo sapiens n       | 0.00456548 | 0.00586924 | 4.9726037  |
|             | Hs.547277 HS.547277     |   | 1 zh47e08.r1 Soares_fetal_live  | 0.00316223 | 0.00427773 | 4.96603274 |
| CCNYL1      | NM_152523.1 CCNYL1      |   | 2 Homo sapiens FLJ40432         | 5.3667E-07 | 4.3081E-06 | 4.96432108 |
| GSTM1       | NM_000561.2 GSTM1       |   | 1 Homo sapiens MGC26563; G      | 2.2425E-06 | 1.2206E-05 | 4.95197011 |
| LOC643802   | XM_00171926 LOC643802   |   | 16 PREDICTED: Homo sapiens s    | 0.00630599 | 0.00775673 | 4.94711275 |

5.0 Upreg

|             |                          |                                  |            |            |            |
|-------------|--------------------------|----------------------------------|------------|------------|------------|
| TDRD3       | NM_030794.1 TDRD3        | 13 Homo sapiens RP11-459E2.1     | 0.04582454 | 0.04129244 | 4.94345037 |
| PRKACB      | NM_207578.1 PRKACB       | 1 Homo sapiens PKACB; MGC4       | 0.00014751 | 0.00032757 | 4.93986525 |
| STAT4       | NM_003151.2 STAT4        | 2 Homo sapiens signal transdu    | 1.0514E-06 | 6.9573E-06 | 4.9383387  |
| SOCS6       | NM_004232.2 SOCS6        | 18 Homo sapiens STAT14; SOCS     | 0.04235494 | 0.03865026 | 4.93215982 |
| PIGQ        | NM_004204.2 PIGQ         | 16 Homo sapiens GPI1; c407A1     | 1.8872E-07 | 2.0724E-06 | 4.92374625 |
| LOC653158   | XM_926814.1 LOC653158    | 5 PREDICTED: Homo sapiens s      | 1.1356E-06 | 7.3695E-06 | 4.89934466 |
| XRCC4       | NM_022406.1 XRCC4        | 5 Homo sapiens X-ray repair cc   | 0.00631389 | 0.00776536 | 4.8910086  |
| LOC651745   | XM_944901.1 LOC651745    | PREDICTED: Homo sapiens h        | 0.00093938 | 0.00152519 | 4.87610121 |
| SNORD96B    | NR_004379.1 SNORD96B     | Homo sapiens U96b                | 0.00322164 | 0.00434471 | 4.87029099 |
| NAV1        | NM_020443.2 NAV1         | 1 Homo sapiens POMFIL3; KIA      | 0.00013657 | 0.00030734 | 4.85334717 |
| ZNF706      | NM_00104251 ZNF706       | 8 Homo sapiens PNAS-113; HS      | 0.00078851 | 0.00131628 | 4.8412078  |
| MRM1        | NM_024864.3 MRM1         | 17 Homo sapiens FLJ22578         | 0.02574401 | 0.02555759 | 4.81965309 |
| SMPDL3A     | NM_006714.2 SMPDL3A      | 6 Homo sapiens yR36GH4.1; F      | 0.00023806 | 0.00048541 | 4.79678357 |
| HLA-DMB     | NM_002118.3 HLA-DMB      | 6 Homo sapiens D6S221E; RIN      | 2.2038E-09 | 1.3428E-07 | 4.79387233 |
| SCG5        | NM_003020.1 SCG5         | 15 Homo sapiens SgV; 7B2; P7E    | 3.0298E-05 | 9.0761E-05 | 4.76288558 |
| HES2        | NM_019089.3 HES2         | 1 Homo sapiens hairy and enh:    | 9.8052E-08 | 1.3677E-06 | 4.75545072 |
| C6orf191    | NM_00101087 C6ORF191     | 6 Homo sapiens bA174C7.4         | 0.01683534 | 0.0178204  | 4.75495161 |
| KIAA0427    | NM_014772.1 KIAA0427     | 18 Homo sapiens Gm672            | 8.5472E-07 | 5.966E-06  | 4.75223074 |
| FUT2        | NM_000511.3 FUT2         | 19 Homo sapiens sej; Se2; SE     | 0.00014213 | 0.00031781 | 4.74478159 |
| WDHD1       | NM_00100839 WDHD1        | 14 Homo sapiens AND-1            | 0.00032387 | 0.00062618 | 4.69866484 |
| FLJ35767    | NM_207459.1 FLJ35767     | 17 Homo sapiens FLJ35767 prot    | 2.467E-12  | 3.6075E-09 | 4.6862401  |
| ZNF548      | NM_152909.2 ZNF548       | 19 Homo sapiens FLJ32932         | 0.00126736 | 0.00196742 | 4.67946582 |
| TIGD2       | NM_145715.1 TIGD2        | 4 Homo sapiens DKFZp667D13       | 0.0003671  | 0.00069597 | 4.67310075 |
| LOC644150   | XM_933686.1 LOC644150    | 7 PREDICTED: Homo sapiens s      | 0.00052046 | 0.00093023 | 4.66500167 |
| SNX19       | NM_014758.1 SNX19        | 11 Homo sapiens CHET8; DKFZ:     | 5.6623E-07 | 4.4677E-06 | 4.65286422 |
| RCAN3       | NM_013441.2 RCAN3        | 1 Homo sapiens RCN3; hRCN3;      | 9.8161E-05 | 0.00023629 | 4.64663285 |
| LOC402677   | XM_943039.1 LOC402677    | PREDICTED: Homo sapiens s        | 0.03192848 | 0.03052637 | 4.63651118 |
| NUDT6       | NM_007083.3 NUDT6        | 4 Homo sapiens ASFGF2; gfg-1     | 0.00082535 | 0.00136841 | 4.6163951  |
| FAM108A3    | NM_00108042 FAM108A3     | 1 Homo sapiens FAM108A2; C1      | 7.4615E-05 | 0.00018834 | 4.6040485  |
| LOC10013303 | XR_038070.1 LOC10013303  | 9 PREDICTED: Homo sapiens n      | 0.0016456  | 0.00245219 | 4.6003703  |
| TRAF3       | NM_003300.2 TRAF3        | 14 Homo sapiens CD40bp; CAP-     | 2.5879E-05 | 8.0291E-05 | 4.56856419 |
| ZSCAN29     | NM_152455.2 ZSCAN29      | 15 Homo sapiens MGC129895; I     | 0.00973818 | 0.0112218  | 4.55506033 |
| NZF792      | NM_175872.3 NZF792       | 19 Homo sapiens FLJ38451; MG     | 0.00954627 | 0.01103834 | 4.54024418 |
| ACOT8       | NM_183386.1 ACOT8        | 20 Homo sapiens PTE1; hTE; HM    | 0.01592765 | 0.01697427 | 4.53209019 |
| DENND1A     | NM_020946.1 DENND1A      | 9 Homo sapiens RP11-230L22.      | 2.3465E-06 | 1.2631E-05 | 4.51873981 |
| ABCC10      | NM_033450.2 ABCC10       | 6 Homo sapiens MRP7; EST182      | 1.2221E-05 | 4.4677E-05 | 4.48721396 |
| PLEKHB1     | NM_021200.1 PLEKHB1      | 11 Homo sapiens PPH1; PHRETJ     | 1.91E-10   | 3.8974E-08 | 4.482751   |
| DNAJC24     | NM_181706.3 DNAJC24      | 11 Homo sapiens JJJ3; ZCSL3      | 0.00013447 | 0.00030354 | 4.48143639 |
|             | Hs.131087 HS.131087      | 3 BX111162 Soares_testis_NH'     | 0.00724098 | 0.00870783 | 4.47617828 |
| LOC642946   | XM_931870.1 LOC642946    | 1 PREDICTED: Homo sapiens h      | 3.6945E-05 | 0.00010709 | 4.4628947  |
| TNK1        | NM_003985.1 TNK1         | 17 Homo sapiens MGC46193         | 0.0015552  | 0.00233693 | 4.45465333 |
| LOC645314   | XM_00172369 LOC645314    | PREDICTED: Homo sapiens s        | 0.02568968 | 0.0255152  | 4.43798051 |
| SPAG1       | NM_172218.1 SPAG1        | 8 Homo sapiens HSD-3.8; TPIE     | 0.00026715 | 0.00053345 | 4.4250577  |
| ATG4A       | NM_178271.1 ATG4A        | Homo sapiens APG4A; AUTL2        | 9.0419E-08 | 1.2796E-06 | 4.41857332 |
| PCBP4       | NM_033009.1 PCBP4        | 3 Homo sapiens LIP4; MCG10       | 0.00335999 | 0.00450772 | 4.41136784 |
| LOC652815   | XM_942488.1 LOC652815    | PREDICTED: Homo sapiens s        | 0.02300198 | 0.02326984 | 4.40665707 |
| KIAA0460    | NM_015203.2 KIAA0460     | 1 Homo sapiens FLJ32145; HS      | 0.00016379 | 0.00035695 | 4.40105296 |
| LOC643224   | XM_932725.1 LOC643224    | 9 PREDICTED: Homo sapiens s      | 0.05260813 | 0.04622309 | 4.39497915 |
| C17orf97    | NM_00101367 C17ORF97     | 17 Homo sapiens chromosome 1     | 4.4571E-05 | 0.00012423 | 4.39343353 |
| NCRNA00092  | NR_024129.1 NCRNA00092   | 9 Homo sapiens non-protein cc    | 1.4045E-05 | 4.979E-05  | 4.39294705 |
|             | Hs.547601 HS.547601      | 22 Homo sapiens full length inse | 2.8703E-07 | 2.8013E-06 | 4.38236546 |
| GAL3ST4     | NM_024637.3 GAL3ST4      | 7 Homo sapiens FLJ12116; GA      | 2.5114E-05 | 7.8529E-05 | 4.37578438 |
| LOC10013326 | XM_00171557 LOC100133264 | PREDICTED: Homo sapiens h        | 0.00687941 | 0.00833816 | 4.37291161 |
| DUSP8       | NM_004420.1 DUSP8        | 11 Homo sapiens HVH-5; FLJ42!    | 0.00310486 | 0.00420727 | 4.34646392 |
| NSD1        | NM_022455.3 NSD1         | 5 Homo sapiens DKFZp666C16       | 2.8218E-05 | 8.6055E-05 | 4.33824023 |
| CD47        | NM_00102508 CD47         | 3 Homo sapiens OA3; MER6; I/     | 1.9016E-07 | 2.083E-06  | 4.33270462 |
| HOXC8       | NM_022658.3 HOXC8        | 12 Homo sapiens HOX3; HOX3A      | 4.9575E-05 | 0.00013576 | 4.32761784 |
| C17orf106   | NM_00111332 C17ORF106    | 17 Homo sapiens MGC54300; Fl     | 0.03621911 | 0.03391893 | 4.30422798 |
| BBS7        | NM_018190.2 BBS7         | 4 Homo sapiens FLJ10715; BB!     | 1.8597E-05 | 6.2326E-05 | 4.27944074 |
| KRT7        | NM_005556.3 KRT7         | 12 Homo sapiens K7; MGC3625,     | 7.1009E-06 | 2.91E-05   | 4.27145079 |
| LOC651772   | XM_940995.1 LOC651772    | PREDICTED: Homo sapiens h        | 0.01131317 | 0.01273402 | 4.25702138 |
| LOC643342   | XR_016301.2 LOC643342    | 9 PREDICTED: Homo sapiens n      | 0.00037257 | 0.00070512 | 4.25561743 |
| LOC10012969 | XM_00171871 LOC10012969  | 10 PREDICTED: Homo sapiens s     | 0.04566299 | 0.04118494 | 4.23708593 |
| LOC643109   | XM_932687.1 LOC643109    | 2 PREDICTED: Homo sapiens h      | 0.03293437 | 0.03127001 | 4.23511128 |
| NKIRAS2     | NM_00100134 NKIRAS2      | 17 Homo sapiens KBRAS2; MGC      | 5.0214E-06 | 2.2433E-05 | 4.23418161 |
| LRRRC8      | NM_032270.2 LRRRC8       | 1 Homo sapiens AD158; FAD1!      | 0.00026932 | 0.00053644 | 4.22950968 |
| TMEM191B    | XM_938147.1 TMEM191B     | 22 PREDICTED: Homo sapiens t!    | 0.00022869 | 0.00046871 | 4.21136961 |
| KIAA0319L   | NM_182686.1 KIAA0319L    | 1 Homo sapiens PP791; RP4-7!     | 0.00141483 | 0.00216042 | 4.20230895 |
| NPAL3       | NM_020448.2 NPAL3        | 1 Homo sapiens RP3-462O23.3      | 3.7814E-08 | 7.1814E-07 | 4.1881286  |
| SNORA72     | NR_002581.1 SNORA72      | 8 Homo sapiens RNU72; U72        | 0.00140884 | 0.00215351 | 4.18793701 |

### 5.0 Upreg

|             |             |             |    |                              |            |            |            |
|-------------|-------------|-------------|----|------------------------------|------------|------------|------------|
| LOC10013013 | XM_00172158 | LOC10013013 | 1  | PREDICTED: Homo sapiens h    | 0.00102399 | 0.0016407  | 4.18371305 |
| LOC651643   | XM_940845.1 | LOC651643   |    | PREDICTED: Homo sapiens h    | 0.02584805 | 0.02564636 | 4.15682428 |
| C14orf147   | NM_138288.2 | C14ORF147   | 14 | Homo sapiens MGC24447        | 4.9441E-06 | 2.2212E-05 | 4.12272202 |
| LOC643534   | XM_936822.2 | LOC643534   |    | PREDICTED: Homo sapiens s    | 0.00634167 | 0.00779079 | 4.10630485 |
| PRICKLE1    | NM_153026.1 | PRICKLE1    | 12 | Homo sapiens MGC138902; l    | 4.2408E-05 | 0.00011957 | 4.08794065 |
| S100A5      | NM_002962.1 | S100A5      | 1  | Homo sapiens S100D           | 0.01766683 | 0.01854616 | 4.08268117 |
| FZD4        | NM_012193.2 | FZD4        | 11 | Homo sapiens FzE4; EVR1; C   | 6.8773E-10 | 7.6381E-08 | 4.06908994 |
| SERPINA5    | NM_000624.3 | SERPINA5    | 14 | Homo sapiens BRO4I; PAI3;    | 1.0695E-05 | 4.005E-05  | 4.05514669 |
| ATP6AP1L    | NM_00101797 | ATP6AP1L    | 5  | Homo sapiens MGC138396       | 7.2685E-08 | 1.092E-06  | 4.04747374 |
| PKD1P1      | XR_078513.1 | PKD1P1      |    | PREDICTED: Homo sapiens p    | 0.01200553 | 0.01338116 | 4.04290144 |
| SLC38A6     | NM_153811.1 | SLC38A6     | 14 | Homo sapiens NAT-1; MGC1C    | 0.0320961  | 0.03064322 | 4.04179741 |
| LOC730153   | XM_00171767 | LOC730153   | 16 | PREDICTED: Homo sapiens h    | 9.2032E-06 | 3.5541E-05 | 4.0364936  |
| UCN         | NM_003353.2 | UCN         | 2  | Homo sapiens MGC129974; l    | 0.00044742 | 0.0008192  | 4.0332751  |
| ADCK5       | NM_174922.3 | ADCK5       | 8  | Homo sapiens MGC126708; l    | 4.3015E-08 | 7.6866E-07 | 4.01874921 |
|             | Hs.582765   | HS.582765   | 6  | DB304592 BRAWH3 Homo sa      | 0.04263153 | 0.0388582  | 3.99433009 |
| WWC3        | NM_015691.2 | WWC3        |    | Homo sapiens BRO4I; KIAA1    | 9.0805E-05 | 0.00022168 | 3.98882763 |
| CA11        | NM_001217.3 | CA11        | 19 | Homo sapiens CARP2; CA-RP    | 1.8035E-06 | 1.0417E-05 | 3.98179691 |
| FAM83B      | NM_00101087 | FAM83B      | 6  | Homo sapiens FLJ30642; MG    | 0.00010411 | 0.00024789 | 3.96986588 |
| TMEM70      | NM_017866.3 | TMEM70      | 8  | Homo sapiens FLJ20533        | 4.7393E-05 | 0.00013064 | 3.94688871 |
| OLFML2A     | NM_182487.1 | OLFML2A     | 9  | Homo sapiens PRO34319; FL    | 0.0002833  | 0.00055996 | 3.93876943 |
| APOBEC3F    | NM_00100666 | APOBEC3F    | 22 | Homo sapiens KA6; BK150C     | 0.01998943 | 0.02060229 | 3.93616006 |
|             | Hs.478682   | HS.478682   | 3  | Homo sapiens cDNA FLJ3109    | 8.6641E-06 | 3.3922E-05 | 3.93323302 |
| SOX12       | NM_006943.2 | SOX12       | 20 | Homo sapiens SOX22           | 0.00021795 | 0.00045016 | 3.93167688 |
| RALGPS1     | NM_014636.1 | RALGPS1     | 9  | Homo sapiens KIAA0351; RA    | 1.5841E-06 | 9.4679E-06 | 3.93083377 |
| NUDT19      | XM_372723.4 | NUDT19      | 19 | PREDICTED: Homo sapiens n    | 0.05296293 | 0.04647897 | 3.9284226  |
| FLJ20444    | XM_928667.1 | FLJ20444    | 9  | PREDICTED: Homo sapiens h    | 0.00044817 | 0.00082042 | 3.92746514 |
| SNORA26     | NR_003016.1 | SNORA26     | 4  | Homo sapiens HBI-6           | 0.0004573  | 0.00083382 | 3.92693941 |
| DOC2A       | NM_003586.2 | DOC2A       | 16 | Homo sapiens double C2-like  | 0.00081281 | 0.00135093 | 3.92045396 |
| SCARNA18    | NR_003139.1 | SCARNA18    | 5  | Homo sapiens U109            | 2.5152E-07 | 2.525E-06  | 3.91905645 |
| LOC644672   | XM_927777.1 | LOC644672   |    | PREDICTED: Homo sapiens s    | 0.03262098 | 0.03104637 | 3.90419855 |
| GDPD5       | NM_030792.4 | GDPD5       | 11 | Homo sapiens PP1665; GDE2    | 4.3411E-07 | 3.7123E-06 | 3.8983211  |
| SNORA79     | NR_003021.2 | SNORA79     | 14 | Homo sapiens ACA65           | 1.2272E-05 | 4.4846E-05 | 3.8961648  |
| CR2         | NM_00100665 | CR2         | 1  | Homo sapiens CD21; SLEB9;    | 0.00010246 | 0.00024461 | 3.88211365 |
| RELL2       | NM_173828.3 | RELL2       | 5  | Homo sapiens RELL2; FLJ90    | 5.9281E-06 | 2.5372E-05 | 3.87947481 |
| TUBGCP6     | NM_00100865 | TUBGCP6     | 22 | Homo sapiens GCP6            | 4.5365E-05 | 0.00012624 | 3.87690767 |
| LOC729952   | XR_015724.2 | LOC729952   | 1  | PREDICTED: Homo sapiens n    | 0.00705321 | 0.00851471 | 3.87151739 |
| NMT2        | NM_004808.2 | NMT2        | 10 | Homo sapiens N-myristoyltra  | 0.00026765 | 0.00053395 | 3.84346436 |
| TMOD1       | NM_003275.1 | TMOD1       | 9  | Homo sapiens ETMOD; D9S5     | 0.0007625  | 0.0012792  | 3.8426042  |
| RPPH1       | NR_002312.1 | RPPH1       | 14 | Homo sapiens H1RNA           | 0.00089003 | 0.00145557 | 3.84044831 |
| SERF1A      | NM_021967.1 | SERF1A      | 5  | Homo sapiens H4F5; 4F5; SM   | 0.00023748 | 0.00048435 | 3.83644968 |
| FHL1        | NM_001449.3 | FHL1        |    | Homo sapiens KYO21; SLIM1;   | 0.00015203 | 0.00033584 | 3.83344905 |
| ST3GAL2     | NM_006927.2 | ST3GAL2     | 16 | Homo sapiens SIAT4B; Gal-N   | 7.5701E-05 | 0.00019075 | 3.8256765  |
| SLC43A3     | NM_017611.2 | SLC43A3     | 11 | Homo sapiens FOAP-13; EEG    | 0.00580642 | 0.00722529 | 3.81595479 |
| GLDC        | NM_000170.1 | GLDC        | 9  | Homo sapiens MGC138198; C    | 9.2583E-09 | 3.077E-07  | 3.79994799 |
| LOC644761   | XR_019390.1 | LOC644761   |    | PREDICTED: Homo sapiens n    | 4.4157E-06 | 2.0434E-05 | 3.79879143 |
| MTSS1       | NM_014751.2 | MTSS1       | 8  | Homo sapiens MIM; KIAA042    | 2.2041E-08 | 5.1569E-07 | 3.79232419 |
| CD164L2     | NM_207397.1 | CD164L2     | 1  | Homo sapiens UNQ6122         | 0.00016793 | 0.00036425 | 3.78939632 |
| LEFTY2      | NM_003240.2 | LEFTY2      | 1  | Homo sapiens LEFTA1; TGFB4   | 0.03608357 | 0.03381365 | 3.78678033 |
| CLDN23      | NM_194284.1 | CLDN23      | 8  | Homo sapiens CLDNL; hCG1C    | 3.2972E-07 | 3.0678E-06 | 3.78141686 |
| APLP1       | NM_005166.3 | APLP1       | 19 | Homo sapiens APLP            | 0.00114011 | 0.00179787 | 3.7769081  |
| TTC13       | XM_939087.1 | TTC13       | 1  | Homo sapiens FLJ22584        | 4.9038E-06 | 2.2087E-05 | 3.7645647  |
| MICAL1      | NM_022765.2 | MICAL1      | 6  | Homo sapiens NICAL; DKFZp    | 4.4488E-07 | 3.7678E-06 | 3.75138687 |
| MGC11082    | XR_079560.1 | MGC11082    |    | PREDICTED: Homo sapiens h    | 0.00329187 | 0.00442717 | 3.74077842 |
| C3orf59     | NM_178496.2 | C3ORF59     | 3  | Homo sapiens chromosome 3    | 0.00082211 | 0.00136381 | 3.73440012 |
| RGS12       | NM_198229.2 | RGS12       | 4  | Homo sapiens DKFZp761K18     | 7.4079E-05 | 0.00018736 | 3.73063507 |
| AIFM2       | NM_032797.4 | AIFM2       | 10 | Homo sapiens PRG3; RP11-3    | 0.00033588 | 0.00064613 | 3.72887943 |
| LOC441032   | XM_933495.1 | LOC441032   | 4  | PREDICTED: Homo sapiens s    | 0.00106699 | 0.00170028 | 3.71697292 |
| DNAJC27     | NM_016544.1 | DNAJC27     | 2  | Homo sapiens RabJS; DKFZp    | 9.5432E-05 | 0.00023098 | 3.71464933 |
| RUNDC3B     | NM_138290.1 | RUNDC3B     | 7  | Homo sapiens RPIP9; RPIB9;   | 2.0354E-07 | 2.1832E-06 | 3.7073062  |
| SLC38A9     | NM_173514.1 | SLC38A9     | 5  | Homo sapiens FLJ90709; MG    | 0.00023545 | 0.00048076 | 3.69868978 |
| SNORD12     | NR_003030.1 | SNORD12     | 20 | Homo sapiens HBII-99         | 0.00900733 | 0.01051074 | 3.6774442  |
| SPER        | NM_001505.1 | SPER        | 7  | Homo sapiens LyGPR; DRY12    | 0.0048359  | 0.00616898 | 3.67515719 |
| MIR488      | NR_030163.1 | MIR488      |    | Homo sapiens microRNA 488    | 0.04282654 | 0.03899544 | 3.67389399 |
| POLA        | NM_016937.1 | POLA        |    | Homo sapiens polymerase (C   | 0.02903067 | 0.02822016 | 3.67130432 |
| AMN1        | NM_207337.1 | AMN1        | 12 | Homo sapiens antagonist of r | 0.00030345 | 0.00059377 | 3.67016097 |
| PNPLA7      | NM_152286.2 | PNPLA7      | 9  | Homo sapiens FLJ44279; NTL   | 6.6876E-08 | 1.0367E-06 | 3.6642344  |
| CCS         | XM_938909.1 | CCS         |    | PREDICTED: Homo sapiens c    | 3.5574E-08 | 6.9362E-07 | 3.65610555 |
|             | Hs.21177    | HS.21177    | 6  | Homo sapiens mRNA full lenç  | 0.00125964 | 0.00195751 | 3.64636051 |
| PTPRE       | NM_130435.2 | PTPRE       | 10 | Homo sapiens DKFZp313F13     | 9.9652E-05 | 0.00023928 | 3.64590888 |
| KIF13B      | NM_015254.2 | KIF13B      | 8  | Homo sapiens KIAA0639; GA    | 5.0771E-06 | 2.2612E-05 | 3.63721078 |

5.0 Upreg

|             |             |              |   |                                 |            |             |            |
|-------------|-------------|--------------|---|---------------------------------|------------|-------------|------------|
| ZXDB        | NM_007157.3 | ZXDB         | X | Homo sapiens dJ83L6.1           | 2.8125E-05 | 8.5863E-05  | 3.62890629 |
| HIST2H2AA4  | NM_00104087 | HIST2H2AA4   |   | 1 Homo sapiens H2A/R            | 3.1308E-09 | 1.5878E-07  | 3.61460849 |
| CTRL        | NM_001907.1 | CTRL         |   | 16 Homo sapiens CTRL1; MGC70    | 8.7636E-06 | 3.4189E-05  | 3.6010839  |
|             | Hs.522924   | HS.522924    |   | 10 Homo sapiens cDNA FLJ4316    | 2.1736E-05 | 7.0165E-05  | 3.59432373 |
| LOC728945   | XM_00172348 | LOC728945    |   | 1 PREDICTED: Homo sapiens s     | 0.04874247 | 0.04344879  | 3.59377201 |
| LOC10013280 | XR_039272.1 | LOC100132804 |   | PREDICTED: Homo sapiens n       | 0.00567003 | 0.0070837   | 3.59176036 |
| ATF6B       | NM_004381.4 | ATF6B        |   | 6 Homo sapiens activating tran  | 0.00388696 | 0.00511921  | 3.57841073 |
| LOC729513   | XR_039881.1 | LOC729513    |   | PREDICTED: Homo sapiens n       | 0.02153038 | 0.002197622 | 3.55045806 |
|             | Hs.326560   | HS.326560    |   | PREDICTED: Homo sapiens L       | 1.2384E-07 | 1.5885E-06  | 3.54555608 |
| INPP5A      | XM_936595.1 | INPP5A       |   | PREDICTED: Homo sapiens ir      | 0.00397967 | 0.00522719  | 3.54307491 |
| SGSM1       | XM_943783.1 | SGSM1        |   | 22 Homo sapiens MGC133298; I    | 1.2554E-05 | 4.5591E-05  | 3.54051532 |
| LOC10013385 | XM_00171453 | LOC100133851 |   | PREDICTED: Homo sapiens s       | 0.00176121 | 0.00260018  | 3.51543277 |
| HLA-DRA     | NM_019111.3 | HLA-DRA      |   | 6 Homo sapiens HLA-DRA1         | 2.2318E-08 | 5.208E-07   | 3.51147158 |
| RN7SK       | NR_001445.1 | RN7SK        |   | 6 Homo sapiens 7SK              | 1.4157E-10 | 3.2688E-08  | 3.50932636 |
| GEM         | NM_005261.2 | GEM          |   | 8 Homo sapiens KIR; MGC2629     | 8.181E-06  | 3.2421E-05  | 3.5007352  |
| TRAPPC2P1   | NR_002166.1 | TRAPPC2P1    |   | 19 Homo sapiens SEDLP1; MIP-    | 0.00017489 | 0.00037656  | 3.48885219 |
| TFAP2C      | NM_003222.3 | TFAP2C       |   | 20 Homo sapiens AP2-GAMMA; "    | 2.622E-08  | 5.7513E-07  | 3.48761418 |
| ZFP30       | NM_014898.1 | ZFP30        |   | 19 Homo sapiens KIAA0961; ZN    | 0.02072092 | 0.02124887  | 3.48461313 |
| ITPKB       | NM_002221.2 | ITPKB        |   | 1 Homo sapiens IP3K-B; IP3KB    | 0.04631036 | 0.04164041  | 3.46913847 |
| MAN2A2      | NM_006122.2 | MAN2A2       |   | 15 Homo sapiens MANA2X          | 0.00145196 | 0.00220826  | 3.45938449 |
| TERF1       | NM_017489.1 | TERF1        |   | 8 Homo sapiens t-TRF1; TRBF1    | 0.00043522 | 0.00080224  | 3.45720231 |
| DAPK3       | NM_001348.1 | DAPK3        |   | 19 Homo sapiens FLJ36473; ZIF   | 3.0921E-06 | 1.5521E-05  | 3.45038181 |
| RNU4-2      | NR_003137.2 | RNU4-2       |   | Homo sapiens RNA, U4 small      | 1.0644E-08 | 3.3714E-07  | 3.44411731 |
| SNORD114-2  | NR_003194.1 | SNORD114-2   |   | 14 Homo sapiens 14q(U1-2)       | 0.03302524 | 0.03133933  | 3.43929727 |
| PFND4       | NM_002623.3 | PFND4        |   | 20 Homo sapiens C1; PFD4        | 0.05181688 | 0.04564672  | 3.42875405 |
|             | Hs.537217   | HS.537217    |   | 14 Homo sapiens mRNA for IgE    | 0.01113453 | 0.0125668   | 3.42819691 |
|             | Hs.534680   | HS.534680    |   | PREDICTED: Homo sapiens h       | 3.4189E-08 | 6.7714E-07  | 3.42769467 |
| CD24        | NM_013230.2 | CD24         | Y | Homo sapiens CD24A              | 3.6665E-10 | 5.9574E-08  | 3.42115535 |
| MMP11       | NM_005940.3 | MMP11        |   | 22 Homo sapiens ST3; SL-3; ST   | 0.00125916 | 0.00195746  | 3.42005983 |
|             | Hs.197064   | HS.197064    |   | 2 602285360F1 NIH_MGC_86 I      | 0.02926632 | 0.02840831  | 3.41277841 |
| LOC645566   | XM_928583.1 | LOC645566    |   | 7 PREDICTED: Homo sapiens h     | 0.04443823 | 0.04025408  | 3.38919245 |
| GALNT2      | NM_004481.2 | GALNT2       |   | 1 Homo sapiens GalNAc-T2        | 0.00135742 | 0.00208581  | 3.38540949 |
| LOC650796   | XM_939881.1 | LOC650796    |   | PREDICTED: Homo sapiens h       | 0.00239387 | 0.00337682  | 3.382731   |
| AGTPBP1     | NM_015239.1 | AGTPBP1      |   | 9 Homo sapiens NNA1; KIAA10     | 2.548E-05  | 7.9389E-05  | 3.37466957 |
| ELOVL3      | NM_152310.1 | ELOVL3       |   | 10 Homo sapiens CIG30; CIG-30   | 2.7112E-08 | 5.8304E-07  | 3.37376373 |
| CYP2R1      | NM_024514.4 | CYP2R1       |   | 11 Homo sapiens MGC4663         | 6.3738E-09 | 2.3797E-07  | 3.37374162 |
| ATRN        | NM_139323.1 | ATRN         |   | 20 Homo sapiens DPPT-L; MGC1    | 4.6265E-05 | 0.00012817  | 3.37331561 |
| C9orf169    | NM_199001.1 | C9ORF169     |   | Homo sapiens chromosome 9       | 1.7339E-08 | 4.4614E-07  | 3.36951742 |
| DAAM1       | NM_014992.1 | DAAM1        |   | 14 Homo sapiens FLJ41657; KIA   | 1.7925E-07 | 2.0112E-06  | 3.36032182 |
| TMEM117     | NM_032256.1 | TMEM117      |   | 12 Homo sapiens DKFZp434K24     | 0.0194637  | 0.02013376  | 3.36015846 |
| PLEKHM1     | NM_014798.1 | PLEKHM1      |   | PREDICTED: Homo sapiens p       | 3.4768E-07 | 3.1678E-06  | 3.35543764 |
| MMP23B      | NM_006983.1 | MMP23B       |   | 1 Homo sapiens MIFR-1; MIFR;    | 0.02260177 | 0.02291253  | 3.35297669 |
| LOC653108   | XM_930914.1 | LOC653108    |   | 21 PREDICTED: Homo sapiens s    | 1.7544E-06 | 1.0235E-05  | 3.34712075 |
| OGDHL       | NM_018245.1 | OGDHL        |   | 10 Homo sapiens oxoglutarate d  | 6.5743E-08 | 1.0319E-06  | 3.3432712  |
| MMP15       | NM_002428.2 | MMP15        |   | 16 Homo sapiens MtMMP2; MT2     | 1.2832E-05 | 4.6372E-05  | 3.33681528 |
| LOC653080   | XM_930884.1 | LOC653080    |   | 8 PREDICTED: Homo sapiens s     | 0.01261548 | 0.01394586  | 3.3325473  |
| MEGF6       | NM_001409.3 | MEGF6        |   | 1 Homo sapiens KIAA0815; EG     | 2.424E-06  | 1.296E-05   | 3.33031866 |
| C11orf24    | NM_022338.2 | C11ORF24     |   | 11 Homo sapiens DM4E3           | 6.0383E-06 | 2.5781E-05  | 3.32113119 |
| LRRC3       | NM_030891.3 | LRRC3        |   | 21 Homo sapiens C21orf102       | 6.7918E-06 | 2.8242E-05  | 3.30665405 |
| CHCHD7      | NM_00101167 | CHCHD7       |   | 8 Homo sapiens FLJ40966; MG     | 1.7564E-09 | 1.1947E-07  | 3.30546691 |
| LOC650708   | XM_939796.1 | LOC650708    |   | PREDICTED: Homo sapiens s       | 0.01722849 | 0.01817515  | 3.29365757 |
| SH3BGR2     | NM_031469.1 | SH3BGR2      |   | 6 Homo sapiens FLJ90025         | 1.3003E-08 | 3.7284E-07  | 3.26751377 |
| GRB10       | NM_005311.3 | GRB10        |   | 7 Homo sapiens RSS; GRB-IR;     | 1.7584E-05 | 5.9659E-05  | 3.26530827 |
| LOC339352   | XR_019601.2 | LOC339352    |   | PREDICTED: Homo sapiens n       | 4.9185E-06 | 2.2119E-05  | 3.2560171  |
| GCH1        | NM_000161.2 | GCH1         |   | 14 Homo sapiens DYT5; GTP-CH    | 0.00580283 | 0.00722184  | 3.25326873 |
| SHROOM2     | NM_001649.2 | SHROOM2      | X | Homo sapiens APXL; DKFZp7       | 0.01244098 | 0.01377899  | 3.25115202 |
| FOXD4L1     | NM_012184.3 | FOXD4L1      |   | 2 Homo sapiens bA395L14.1       | 4.6616E-06 | 2.1292E-05  | 3.24954821 |
| ZBTB42      | NM_00113760 | ZBTB42       |   | 14 Homo sapiens zinc finger anc | 8.2697E-08 | 1.1895E-06  | 3.24427705 |
| NEU1        | NM_000434.2 | NEU1         |   | 6 Homo sapiens NEU; SIAL1       | 5.3592E-11 | 1.9592E-08  | 3.2361186  |
| MUC1        | NM_00104439 | MUC1         |   | 1 Homo sapiens PEMT; PUM; PI    | 2.3151E-05 | 7.3864E-05  | 3.21639394 |
| CHURC1      | NM_145165.2 | CHURC1       |   | 14 Homo sapiens FLJ33064; chc   | 1.3157E-08 | 3.7601E-07  | 3.20354454 |
| KLK10       | NM_145888.1 | KLK10        |   | 19 Homo sapiens NES1; PRSSL1    | 0.01692476 | 0.01789994  | 3.20054188 |
| MAN1A1      | NM_005907.2 | MAN1A1       |   | 6 Homo sapiens MAN9; HUMM:      | 1.1897E-06 | 7.6413E-06  | 3.19358721 |
| HNF1B       | NM_000458.2 | HNF1B        |   | 17 Homo sapiens VHNF1; MODY     | 0.00203069 | 0.00293289  | 3.19311482 |
| RNF175      | NM_173662.1 | RNF175       |   | 4 Homo sapiens FLJ34190         | 0.00407585 | 0.00533595  | 3.19002217 |
| C3orf46     | XM_933917.1 | C3ORF46      |   | 3 PREDICTED: Homo sapiens c     | 0.0077189  | 0.00919186  | 3.18401009 |
| HPSE        | NM_006665.2 | HPSE         |   | 4 Homo sapiens HPA; HSE1; H     | 1.2218E-05 | 4.4685E-05  | 3.18026456 |
| ZMAT5       | NM_019103.2 | ZMAT5        |   | 22 Homo sapiens zinc finger, ma | 2.7378E-06 | 1.4206E-05  | 3.17485288 |
| TMCO4       | NM_181719.2 | TMCO4        |   | 1 Homo sapiens RP5-1056L3.6     | 0.00506354 | 0.00641923  | 3.16844672 |
| LCMT2       | NM_014793.3 | LCMT2        |   | 15 Homo sapiens TYW4; PPM2;     | 0.00020502 | 0.0004284   | 3.16242388 |

5.0 Upreg

|             |             |              |    |                         |                   |            |            |            |
|-------------|-------------|--------------|----|-------------------------|-------------------|------------|------------|------------|
| AP2A1       | NM_014203.2 | AP2A1        | 19 | Homo sapiens            | CLAPA1; AP2-      | 3.3104E-07 | 3.0736E-06 | 3.16079451 |
| C21orf2     | NM_004928.1 | C21ORF2      | 21 | Homo sapiens            | A2; YF5           | 1.8035E-05 | 6.0814E-05 | 3.15713426 |
| TMC5        | NM_024780.3 | TMC5         | 16 | Homo sapiens            | FLJ13593          | 0.01022936 | 0.01169412 | 3.14851077 |
| LOC728965   | XM_00112893 | LOC728965    | 17 | PREDICTED: Homo sapiens | s                 | 0.0310598  | 0.02982258 | 3.14675717 |
|             | Hs.578161   | HS.578161    | 14 | SM014446                | Placenta 3 EST Hc | 0.03968784 | 0.03660092 | 3.14487989 |
| CYB5R1      | NM_016243.2 | CYB5R1       | 1  | Homo sapiens            | B5R.1; NQO3/      | 1.9329E-08 | 4.8043E-07 | 3.14230852 |
| C3orf17     | NM_00102507 | C3ORF17      | 3  | Homo sapiens            | DKFZP434F20       | 0.0006253  | 0.00108363 | 3.14151972 |
| TAOK1       | NM_020791.1 | TAOK1        | 17 | Homo sapiens            | TAO1; MAP3K:      | 0.02253401 | 0.02284912 | 3.13011515 |
| XIAP        | NM_001167.2 | XIAP         |    | Homo sapiens            | XLP2; ILP1; AI    | 0.00035398 | 0.00067503 | 3.12667296 |
| ENTPD5      | NM_001249.1 | ENTPD5       | 14 | Homo sapiens            | NTPDase-5; M      | 0.05637185 | 0.04905838 | 3.12617343 |
| SMARCD3     | NM_003078.3 | SMARCD3      | 7  | Homo sapiens            | Rsc6p; BAF60      | 0.00012329 | 0.00028349 | 3.12373791 |
| ANKRD22     | NM_144590.1 | ANKRD22      | 10 | Homo sapiens            | MGC22805          | 0.04942769 | 0.04392127 | 3.12107331 |
| FRZB        | NM_001463.2 | FRZB         | 2  | Homo sapiens            | FRZB-1; FRZB      | 0.00414169 | 0.00541084 | 3.11678394 |
| TOX4        | NM_014828.1 | TOX4         | 14 | Homo sapiens            | KIAA0737; LC      | 2.8207E-05 | 8.6054E-05 | 3.11351316 |
| MYOM2       | NM_003970.1 | MYOM2        | 8  | Homo sapiens            | TTNAP             | 2.4371E-05 | 7.6696E-05 | 3.10871411 |
| C5AR1       | NM_001736.2 | C5AR1        | 19 | Homo sapiens            | CD88; C5AR; I     | 0.0341101  | 0.00220857 | 3.10573249 |
| PNPLA8      | NM_015723.2 | PNPLA8       | 7  | Homo sapiens            | IPLA2G; IPLA2     | 1.8004E-06 | 1.0413E-05 | 3.10290064 |
| LOC10013074 | XR_037442.1 | LOC100130746 |    | PREDICTED: Homo sapiens | n                 | 0.00478285 | 0.00611018 | 3.0975452  |
| MAGEE1      | NM_020932.1 | MAGEE1       |    | Homo sapiens            | KIAA1587; HC      | 4.5828E-06 | 2.0975E-05 | 3.0923904  |
| SGK         | NM_005627.2 | SGK          | 6  | Homo sapiens            | SGK1              | 1.585E-09  | 1.1399E-07 | 3.08618187 |
| ZNF177      | NM_003451.1 | ZNF177       | 19 | Homo sapiens            | PIGX              | 0.00497126 | 0.00631685 | 3.08549442 |
| SGK1        | NM_005627.3 | SGK1         | 6  | Homo sapiens            | SGK               | 6.0509E-09 | 2.2884E-07 | 3.08424812 |
| C9orf50     | NM_199350.1 | C9ORF50      | 9  | Homo sapiens            | FLJ35803          | 0.00975953 | 0.01124492 | 3.07976587 |
| LOC729858   | XR_037908.1 | LOC729858    |    | PREDICTED: Homo sapiens | n                 | 0.00022931 | 0.00046976 | 3.07889319 |
| CAPN5       | NM_004055.3 | CAPN5        | 11 | Homo sapiens            | HTRA3; FLJ46      | 8.8013E-08 | 1.2556E-06 | 3.06500531 |
| FIGNL1      | NM_00104276 | FIGNL1       | 7  | Homo sapiens            | fidgetin-like 1   | 9.296E-08  | 1.3092E-06 | 3.06339851 |
| LOC650737   | XM_944786.1 | LOC650737    |    | PREDICTED: Homo sapiens | h                 | 5.7035E-07 | 4.4841E-06 | 3.06128374 |
| PLD1        | NM_002662.2 | PLD1         | 3  | Homo sapiens            | phospholipase     | 0.00026604 | 0.00053159 | 3.06113388 |
| LOC10012897 | XR_037834.1 | LOC100128974 |    | PREDICTED: Homo sapiens | n                 | 9.9725E-05 | 0.00023933 | 3.05830574 |
| MICALL1     | NM_033386.2 | MICALL1      | 22 | Homo sapiens            | KIAA1668; MI      | 0.00644072 | 0.00789368 | 3.04584021 |
| HIST2H2AC   | NM_003517.2 | HIST2H2AC    | 1  | Homo sapiens            | H2AFQ; MGC7       | 1.1847E-08 | 3.5237E-07 | 3.03998347 |
| ADAT2       | NM_182503.2 | ADAT2        | 6  | Homo sapiens            | TAD2; dJ20N2      | 0.00031391 | 0.00061016 | 3.03940839 |
| C14orf79    | NM_174891.2 | C14ORF79     | 14 | Homo sapiens            | chromosome J      | 1.8944E-07 | 2.0777E-06 | 3.03769667 |
| EXPH5       | NM_015065.1 | EXPH5        | 11 | Homo sapiens            | SLAC2-B; KIA      | 9.9569E-05 | 0.00023915 | 3.02937165 |
| GSTT2       | NM_00108084 | GSTT2        |    | Homo sapiens            | glutathione S-    | 6.1599E-07 | 4.7285E-06 | 3.02382541 |
| ITGB7       | NM_000889.1 | ITGB7        | 12 | Homo sapiens            | integrin, beta    | 0.0549272  | 0.04799156 | 3.01153496 |
| LOC731007   | XM_938196.1 | LOC731007    |    | PREDICTED: Homo sapiens | s                 | 8.5774E-05 | 0.00021217 | 3.01026827 |
| PTPN18      | NM_014369.2 | PTPN18       | 2  | Homo sapiens            | BDP1              | 0.02054217 | 0.02108282 | 3.00817114 |
| LOC642648   | XM_926474.1 | LOC642648    |    | PREDICTED: Homo sapiens | h                 | 0.0309371  | 0.02972103 | 3.00428477 |
| LOC648526   | XM_937579.1 | LOC648526    |    | PREDICTED: Homo sapiens | s                 | 1.4058E-09 | 1.1013E-07 | 3.00048869 |
| ZNF91       | NM_003430.1 | CNF91        | 19 | Homo sapiens            | HTF10; HPF7       | 3.583E-06  | 1.7436E-05 | 2.99506749 |
| DDX60       | NM_017631.3 | DDX60        | 4  | Homo sapiens            | FLJ20035; FLJ     | 0.04155511 | 0.03801132 | 2.99021899 |
| RAB24       | NM_00103167 | RAB24        | 5  | Homo sapiens            | RAB24, memb       | 6.2936E-10 | 7.3627E-08 | 2.98613341 |
| ZFP92       | NM_00113627 | ZFP92        |    | Homo sapiens            | zinc finger pro   | 3.9409E-05 | 0.00011259 | 2.98418028 |
| GABRG2      | NM_198904.1 | GABRG2       | 5  | Homo sapiens            | ECA2; GEFSP       | 0.00029502 | 0.00057974 | 2.98402507 |
| ABHD8       | NM_024527.3 | ABHD8        | 19 | Homo sapiens            | FLJ11743; MG      | 6.9709E-07 | 5.1614E-06 | 2.97687858 |
| LOC732371   | XM_941758.1 | LOC732371    |    | PREDICTED: Homo sapiens | s                 | 8.0771E-05 | 0.00020139 | 2.97166812 |
| RRAGC       | NM_022157.2 | RRAGC        | 1  | Homo sapiens            | FLJ13311; GTI     | 5.6636E-05 | 0.00015086 | 2.96883017 |
| LOC653127   | XM_931760.1 | LOC653127    | 17 | PREDICTED: Homo sapiens | s                 | 0.00864693 | 0.01014823 | 2.96728147 |
| SCARNA11    | NR_003012.1 | SCARNA11     | 12 | Homo sapiens            | ACA57             | 3.3048E-09 | 1.6382E-07 | 2.96350137 |
| LOC730525   | NM_199327.1 | LOC730525    |    | PREDICTED: Homo sapiens | h                 | 0.01125728 | 0.01268089 | 2.96313041 |
| FLJ21865    | NM_022759.1 | FLJ21865     | 17 | Homo sapiens            | DKFZp434P17       | 3.6717E-06 | 1.7701E-05 | 2.96159875 |
| OPTN        | NM_00100821 | OPTN         | 10 | Homo sapiens            | FIP2; HYPL; N     | 8.269E-08  | 1.1913E-06 | 2.95961789 |
| RNFT1       | NM_016125.2 | RNFT1        | 17 | Homo sapiens            | PTD016; MGC       | 1.2583E-06 | 7.9367E-06 | 2.94766235 |
| LOC388588   | XM_946205.1 | LOC388588    | 1  | PREDICTED: Homo sapiens | h                 | 2.6059E-07 | 2.5777E-06 | 2.94551875 |
| LYPD6       | NM_194317.2 | LYPD6        | 2  | Homo sapiens            | MGC52057          | 0.00025737 | 0.0005178  | 2.92606787 |
| LFNG        | NM_00104016 | LFNG         | 7  | Homo sapiens            | SCD03             | 1.6303E-06 | 9.6844E-06 | 2.92556464 |
| KLRA1       | NM_006611.1 | KLRA1        | 12 | Homo sapiens            | LY49L; Ly-49L     | 0.0005984  | 0.00104505 | 2.92471038 |
| B3GAT3      | NM_012200.2 | B3GAT3       | 11 | Homo sapiens            | GLCATI; GlcAT     | 0.03576007 | 0.03356427 | 2.91910342 |
| KLHL35      | NM_173583.1 | KLHL35       | 11 | Homo sapiens            | kelch-like 35 (   | 0.0156207  | 0.0166816  | 2.91806268 |
| CSAD        | NM_015989.3 | CSAD         | 12 | Homo sapiens            | PCAP; MGC11'      | 2.2922E-07 | 2.3661E-06 | 2.91667067 |
| DNAJC30     | NM_032317.2 | DNAJC30      | 7  | Homo sapiens            | MGC12943          | 0.00430043 | 0.00557094 | 2.91083199 |
| C5orf5      | NM_016603.1 | C5ORF5       | 5  | Homo sapiens            | KHCHP; MGC5       | 8.2189E-07 | 5.8109E-06 | 2.90451713 |
| ANO10       | NM_018075.2 | ANO10        | 3  | Homo sapiens            | FLJ10375; MG      | 0.01244522 | 0.01378195 | 2.902586   |
| SLC36A4     | NM_152313.2 | SLC36A4      | 11 | Homo sapiens            | FLJ38932; PAI     | 0.04324786 | 0.03931786 | 2.90015446 |
| DKFZp686115 | NM_207495.2 | DKFZP686115  | 6  | Homo sapiens            | hypothetical p    | 0.00626213 | 0.00772009 | 2.89740483 |
| C1orf124    | NM_032018.4 | C1ORF124     | 1  | Homo sapiens            | DKFZP547N04       | 0.00573033 | 0.00714581 | 2.88720001 |
| LOC10013342 | XM_00171382 | LOC100133420 |    | PREDICTED: Homo sapiens | h                 | 0.00562869 | 0.00703706 | 2.88642516 |
| PROK2       | NM_021935.2 | PROK2        | 3  | Homo sapiens            | PK2; BV8; MI'     | 0.00656041 | 0.00802021 | 2.88595032 |
| LOC645001   | XR_039155.1 | LOC645001    |    | PREDICTED: Homo sapiens | n                 | 0.00993539 | 0.0114086  | 2.88001554 |

## 5.0 Upreg

|             |                         |                                |            |            |            |
|-------------|-------------------------|--------------------------------|------------|------------|------------|
| JUN         | NM_002228.3 JUN         | 1 Homo sapiens AP1; c-Jun      | 7.4105E-11 | 2.1673E-08 | 2.87223392 |
| TM2D2       | NM_078473.2 TM2D2       | 8 Homo sapiens MGC125814; I    | 5.7654E-07 | 4.5166E-06 | 2.86953037 |
| MT1G        | NM_005950.1 MT1G        | 16 Homo sapiens MT1; MT1K; M   | 5.7483E-11 | 1.9398E-08 | 2.86039632 |
| EPM2AIP1    | NM_014805.2 EPM2AIP1    | 3 Homo sapiens FLJ11207; KIA   | 6.4346E-06 | 2.7065E-05 | 2.85969244 |
| ISL1        | NM_002202.1 ISL1        | 5 Homo sapiens Isl-1           | 1.1046E-06 | 7.2165E-06 | 2.85870375 |
| C4orf23     | NM_152544.1 C4ORF23     | 4 Homo sapiens FLJ12891; FLJ   | 0.02662345 | 0.02630861 | 2.85518317 |
| TMEM25      | NM_032780.2 TMEM25      | 11 Homo sapiens FLJ14399       | 0.00119554 | 0.00187316 | 2.85446859 |
| SUSD3       | NM_145006.2 SUSD3       | 9 Homo sapiens MGC26847        | 0.00010801 | 0.00025495 | 2.84591554 |
| LOC644128   | XM_927344.1 LOC644128   | 8 PREDICTED: Homo sapiens h    | 1.1879E-05 | 4.3665E-05 | 2.84371476 |
| KBTBD7      | NM_032138.3 KBTBD7      | 13 Homo sapiens DKFZP434E23    | 0.0001167  | 0.00027081 | 2.84234325 |
| RANBP6      | NM_012416.2 RANBP6      | 9 Homo sapiens RAN binding p   | 1.0227E-05 | 3.8762E-05 | 2.84127655 |
| FAM118B     | NM_024556.1 FAM118B     | 11 Homo sapiens FLJ21103       | 0.00038557 | 0.00072551 | 2.84096895 |
| GADD45B     | NM_015675.1 GADD45B     | 19 Homo sapiens MYD118; DKF    | 8.8682E-07 | 6.1219E-06 | 2.83944704 |
| VGf         | NM_003378.2 VGf         | 7 Homo sapiens VGf nerve gro   | 1.1475E-11 | 7.745E-09  | 2.83860597 |
| PTH2        | NM_178449.2 PTH2        | 19 Homo sapiens parathyroid hc | 0.00010686 | 0.00025291 | 2.83677774 |
| MPP7        | NM_173496.2 MPP7        | 10 Homo sapiens FLJ32798; RP   | 0.00023114 | 0.00047317 | 2.83468538 |
| SERPINF2    | NM_000934.1 SERPINF2    | 17 Homo sapiens API; A2AP; AA  | 0.01384086 | 0.0150707  | 2.83325735 |
| NHEDC2      | XM_933390.1 NHEDC2      | 4 Homo sapiens FLJ23984; NH    | 0.00016585 | 0.00036081 | 2.83302975 |
| METTL9      | NM_00107718 METTL9      | 16 Homo sapiens PAP1; FLJ219   | 0.00951461 | 0.01101044 | 2.83266464 |
| SNORD3A     | NR_006880.1 SNORD3A     | 17 Homo sapiens U3             | 1.059E-10  | 2.6549E-08 | 2.83168898 |
| SECISBP2L   | NM_014701.2 SECISBP2L   | 15 Homo sapiens SECIS binding  | 7.3979E-06 | 2.9912E-05 | 2.82891172 |
| MIER2       | NM_017550.1 MIER2       | 19 Homo sapiens KIAA1193       | 0.00241574 | 0.00340166 | 2.82603406 |
| ACAD10      | NM_025247.3 ACAD10      | 12 Homo sapiens MGC5601        | 1.8392E-06 | 1.0568E-05 | 2.82559206 |
| LOC648366   | XM_497707.2 LOC648366   | PREDICTED: Homo sapiens s      | 0.05417851 | 0.04744608 | 2.82118854 |
| C5orf54     | NM_022090.3 C5ORF54     | 5 Homo sapiens chromosome 5    | 0.03362017 | 0.03182129 | 2.81794691 |
| LOC729760   | XR_016027.1 LOC729760   | 2 PREDICTED: Homo sapiens n    | 0.00064604 | 0.00111167 | 2.81492272 |
| CLN5        | NM_006493.1 CLN5        | 13 Homo sapiens FLJ90628; NC   | 9.0202E-05 | 0.00022058 | 2.81451283 |
| C21orf119   | NM_032910.2 C21ORF119   | 21 Homo sapiens PRED84; MGC    | 0.00010781 | 0.00025463 | 2.81423038 |
| ANGPTL4     | NM_00103966 ANGPTL4     | 19 Homo sapiens HFARP; ANGPT   | 2.1524E-07 | 2.2781E-06 | 2.81274351 |
| PCBD2       | NM_032151.3 PCBD2       | 5 Homo sapiens DCOH2; DCOH     | 0.00659726 | 0.0080518  | 2.81046554 |
| BMPR2       | NM_001204.5 BMPR2       | 2 Homo sapiens BRK-3; BMPR3    | 0.00012334 | 0.00028352 | 2.80650339 |
| CYR61       | NM_001554.3 CYR61       | 1 Homo sapiens CCN1; IGFBP1    | 3.1602E-10 | 5.5455E-08 | 2.8045981  |
| GBA         | NM_00100574 GBA         | 1 Homo sapiens GCB; GBA1; G    | 1.3485E-09 | 1.0955E-07 | 2.78626442 |
| CASC5       | NM_144508.2 CASC5       | 15 Homo sapiens D40; AF15Q14   | 0.00024533 | 0.00049769 | 2.78516367 |
| TBC1D16     | NM_019020.2 TBC1D16     | 17 Homo sapiens FLJ20748; MG   | 3.2027E-07 | 3.0022E-06 | 2.77832984 |
| WASF2       | NM_006990.2 WASF2       | 1 Homo sapiens SCAR2; WAVE     | 0.00335741 | 0.00450565 | 2.77612756 |
| MMP7        | NM_002423.3 MMP7        | 11 Homo sapiens MMP-7; PUMP    | 0.00020858 | 0.00043481 | 2.77426909 |
| LOC10012995 | XM_00171910 LOC10012995 | 6 PREDICTED: Homo sapiens s    | 0.00041045 | 0.0007651  | 2.76835742 |
| BTC         | NM_001729.1 BTC         | 4 Homo sapiens betacellulin (B | 0.01584648 | 0.01690008 | 2.7655493  |
|             | Hs.403972               | 1 Homo sapiens cDNA clone IM   | 0.00083372 | 0.00137889 | 2.76420056 |
| C10orf84    | NM_022063.1 C10ORF84    | 10 Homo sapiens RP11-319I23.   | 0.01212191 | 0.01349032 | 2.75506593 |
| LOC152195   | NM_194289.1 LOC152195   | 3 Homo sapiens hypothetical p  | 0.00031023 | 0.00060422 | 2.74777705 |
| LENG1       | NM_024316.1 LENG1       | 19 Homo sapiens leukocyte rece | 0.03797839 | 0.03529151 | 2.73756024 |
| C1orf53     | NM_00102459 C1ORF53     | 1 Homo sapiens chromosome 1    | 1.5511E-08 | 4.2135E-07 | 2.73301019 |
| GRAMD3      | NM_023927.1 GRAMD3      | 5 Homo sapiens NS3TP2; FLJ2    | 4.5138E-05 | 0.00012573 | 2.73013043 |
| LIPG        | NM_006033.2 LIPG        | 18 Homo sapiens EL; PRO719; E  | 0.00248509 | 0.00347977 | 2.72631038 |
| FAM109A     | NM_144671.2 FAM109A     | 12 Homo sapiens FLJ32356       | 0.01274315 | 0.01406218 | 2.72407124 |
|             | Hs.550193               | 5 Human unidentified mRNA, p   | 0.001409   | 0.00215301 | 2.72389461 |
| LOC729404   | XR_015968.1 LOC729404   | 17 PREDICTED: Homo sapiens n   | 0.02540487 | 0.02529245 | 2.72341191 |
| FOXD4       | NM_207305.2 FOXD4       | 9 Homo sapiens FOXD4A; MGC     | 4.0008E-07 | 3.4859E-06 | 2.71425527 |
| PAFAH2      | NM_000437.2 PAFAH2      | 1 Homo sapiens HSD-PLA2; FL    | 8.5808E-05 | 0.0002122  | 2.70285293 |
| LOC652900   | XM_00172491 LOC652900   | PREDICTED: Homo sapiens s      | 0.00015087 | 0.00033336 | 2.69819577 |
|             | Hs.576106               | 10 Homo sapiens cDNA FLJ4005   | 0.00025676 | 0.00051717 | 2.69394264 |
| VASH1       | NM_014909.2 VASH1       | 14 Homo sapiens KIAA1036       | 1.252E-07  | 1.5967E-06 | 2.69302334 |
| RND3        | NM_005168.3 RND3        | 2 Homo sapiens RhoE; Rho8; r   | 7.7689E-09 | 2.7157E-07 | 2.68967397 |
| WIZ         | NM_021241.2 WIZ         | 19 Homo sapiens ZNF803         | 0.00138844 | 0.00212567 | 2.68875762 |
|             | Hs.254752               | 3 xv32c11.x1 Soares_NFL_T_C    | 0.02563791 | 0.0254782  | 2.68652933 |
| C10orf26    | NM_017787.3 C10ORF26    | 10 Homo sapiens MGC125648; I   | 6.8274E-06 | 2.8323E-05 | 2.6858698  |
| SNORD51     | NR_002589.1 SNORD51     | 2 Homo sapiens U51; RNU51      | 0.00019495 | 0.00041186 | 2.68465837 |
|             | Hs.379955               | 21 AGENCOURT_7906333 NIH_I     | 0.05577801 | 0.04861392 | 2.67514563 |
| RPL23AP53   | NR_003572.2 RPL23AP53   | 8 Homo sapiens ribosomal prot  | 4.5431E-06 | 2.0837E-05 | 2.67135843 |
| TMEM80      | XM_938671.1 TMEM80      | PREDICTED: Homo sapiens tt     | 0.01041633 | 0.01188155 | 2.66420649 |
| LOC642299   | XM_930677.1 LOC642299   | 1 PREDICTED: Homo sapiens h    | 0.00647631 | 0.00792844 | 2.66039869 |
| EXT1        | NM_000127.2 EXT1        | 8 Homo sapiens ttv; EXT        | 8.3956E-09 | 2.8551E-07 | 2.66009863 |
| CCRK        | NM_012119.3 CCRK        | 9 Homo sapiens p42; CDCH       | 1.2489E-05 | 4.5431E-05 | 2.65877731 |
| LPXN        | NM_004811.1 LPXN        | 11 Homo sapiens LDPL           | 7.3931E-05 | 0.00018715 | 2.65698564 |
| HCP5        | NM_006674.2 HCP5        | 6 Homo sapiens P5-1; D6S265    | 4.7772E-09 | 1.9405E-07 | 2.6507341  |
| RAB11B      | NM_004218.1 RAB11B      | 19 Homo sapiens H-YPT3; MGC1   | 0.04166738 | 0.03810606 | 2.65051219 |
| TNFSF9      | NM_003811.2 TNFSF9      | 19 Homo sapiens 4-1BB-L        | 5.6526E-06 | 2.448E-05  | 2.64386404 |
| HEATR7A     | NM_00109928 HEATR7A     | 8 Homo sapiens DKFZp434I01     | 0.00108542 | 0.00172526 | 2.64160029 |

5.0 Upreg

|             |             |             |    |                           |                 |            |            |            |            |
|-------------|-------------|-------------|----|---------------------------|-----------------|------------|------------|------------|------------|
| FAM173B     | NM_199133.1 | FAM173B     | 5  | Homo sapiens              | FLJ20667        | 7.2156E-06 | 2.9419E-05 | 2.64041549 |            |
| VPS18       | NM_020857.2 | VPS18       | 15 | Homo sapiens              | KIAA1475; PE    | 1.9052E-06 | 1.0883E-05 | 2.63974545 |            |
| ZNF77       | NM_021217.1 | ZNF77       | 19 | Homo sapiens              | pT1             | 0.00041597 | 0.00077341 | 2.63744234 |            |
| TMEM8       | NM_021259.1 | TMEM8       | 16 | Homo sapiens              | M83; TMEM6      | 2.6011E-06 | 1.3707E-05 | 2.63519899 |            |
| MAMDC2      | NM_153267.3 | MAMDC2      | 9  | Homo sapiens              | MGC21981        | 0.01910521 | 0.01981666 | 2.63461693 |            |
| PXK         | NM_017771.2 | PXK         | 3  | Homo sapiens              | MONaKA; FLJ2    | 0.02244229 | 0.02276137 | 2.63295689 |            |
| AKAP13      | NM_007200.3 | AKAP13      | 15 | Homo sapiens              | HA-3; FLJ1195   | 1.4626E-06 | 8.8746E-06 | 2.62407609 |            |
| MBTPS2      | NM_015884.1 | MBTPS2      |    | Homo sapiens              | S2P             | 0.0515487  | 0.04545611 | 2.62059301 |            |
| GDE1        | NM_016641.3 | GDE1        | 16 | Homo sapiens              | GDE1; 363E6.    | 1.2347E-07 | 1.5862E-06 | 2.61886213 |            |
| PTPN20      | XM_937744.1 | PTPN20      |    | PREDICTED: Homo sapiens   | p               | 0.01990933 | 0.02052938 | 2.61588861 |            |
| ARFGEF2     | NM_006420.1 | ARFGEF2     | 20 | Homo sapiens              | FLJ23723; dJ1   | 0.02064723 | 0.02117826 | 2.61327954 |            |
| NARG2       | NM_024611.4 | NARG2       | 15 | Homo sapiens              | BRCC1           | 0.00916289 | 0.01066815 | 2.61143974 |            |
| LOC652690   | XM_942299.1 | LOC652690   |    | PREDICTED: Homo sapiens   | s               | 0.01150465 | 0.01291477 | 2.60948803 |            |
| LOC10012907 | XM_00172099 | LOC10012907 |    | PREDICTED: Homo sapiens   | s               | 0.00276932 | 0.00381086 | 2.60875578 |            |
| NOC4L       | XM_942717.1 | NOC4L       |    | PREDICTED: Homo sapiens   | n               | 0.00062401 | 0.00108182 | 2.60469021 |            |
| FLJ32810    | XM_922684.1 | FLJ32810    |    | PREDICTED: Homo sapiens   | h               | 0.03151115 | 0.03019646 | 2.60126386 |            |
| ZFYVE1      | NM_021260.1 | ZFYVE1      | 14 | Homo sapiens              | KIAA1589; TA    | 0.01107276 | 0.01251158 | 2.59923061 |            |
| SCNN1D      | NM_002978.2 | SCNN1D      | 1  | Homo sapiens              | SCNED; ENaC     | 1.7261E-05 | 5.8816E-05 | 2.59908492 |            |
| SLC45A4     | NM_00108043 | SLC45A4     | 8  | Homo sapiens              | KIAA1126        | 0.0011073  | 0.00175432 | 2.59849148 |            |
| C14orf133   | NM_022067.2 | C14orf133   | 14 | Homo sapiens              | FLJ12707        | 0.0002213  | 0.00045559 | 2.59782611 |            |
| TMEM2       | NM_013390.1 | TMEM2       | 9  | Homo sapiens              | transmembrar    | 3.5971E-06 | 1.7456E-05 | 2.59695028 |            |
|             | Hs.567472   | HS.567472   | 7  | BX400436                  | Homo sapiens    | T C        | 0.02758169 | 0.02706955 | 2.59661969 |
| LOC727768   | XR_042487.1 | LOC727768   |    | PREDICTED: Homo sapiens   | n               | 3.4151E-07 | 3.131E-06  | 2.59559791 |            |
| IFT20       | NM_174887.2 | IFT20       | 17 | Homo sapiens              | intraflagellar  | t          | 5.8147E-06 | 2.4948E-05 | 2.59526542 |
| LOC441019   | XM_498969.2 | LOC441019   | 4  | PREDICTED: Homo sapiens   | h               | 3.8511E-08 | 7.2509E-07 | 2.59480267 |            |
| TMEM145     | NM_173633.1 | TMEM145     | 19 | Homo sapiens              | FLJ90805        | 2.6939E-07 | 2.6498E-06 | 2.59176945 |            |
| MANEAL      | NM_00103174 | MANEAL      | 1  | Homo sapiens              | RP11-109P14.    | 0.00076701 | 0.00128505 | 2.58885127 |            |
| POLR2J      | NM_006234.4 | POLR2J      | 7  | Homo sapiens              | RPB11; MGC7     | 9.1686E-06 | 3.5485E-05 | 2.58660646 |            |
| C7orf52     | NM_198571.1 | C7orf52     | 7  | Homo sapiens              | FLJ39237; DK    | 0.00317341 | 0.00429088 | 2.5815089  |            |
| GSTTP2      | NR_003082.1 | GSTTP2      | 22 | Homo sapiens              | FLJ46109        | 0.03196581 | 0.03055207 | 2.56548585 |            |
| SAP18       | NM_005870.3 | SAP18       | 13 | Homo sapiens              | SAP18p; MGC     | 6.2531E-07 | 4.7791E-06 | 2.56257159 |            |
| GALNT5      | NM_014568.1 | GALNT5      | 2  | Homo sapiens              | MGC165041; C    | 0.02770341 | 0.0271647  | 2.56127019 |            |
| TMEM175     | NM_032326.2 | TMEM175     | 4  | Homo sapiens              | MGC4618         | 4.0201E-10 | 5.7824E-08 | 2.55710184 |            |
|             | Hs.535044   | HS.535044   |    | PREDICTED: Homo sapiens   | s               | 0.00021158 | 0.0004397  | 2.55702015 |            |
| MAP2K3      | NM_145109.1 | MAP2K3      | 17 | Homo sapiens              | MAPKK3; PRKI    | 1.3983E-06 | 8.6157E-06 | 2.54897598 |            |
| FAM108B1    | NM_016014.2 | FAM108B1    | 9  | Homo sapiens              | CGI-67; RP11-   | 0.00041757 | 0.00077588 | 2.54890104 |            |
| MLL5        | NM_182931.1 | MLL5        | 7  | Homo sapiens              | HDCMC04P; M     | 0.00740318 | 0.00887855 | 2.5448979  |            |
| LAMB2       | NM_002292.2 | LAMB2       | 3  | Homo sapiens              | LAMS            | 2.7894E-08 | 5.9116E-07 | 2.54025687 |            |
| RUSC2       | NM_014806.1 | RUSC2       | 9  | Homo sapiens              | KIAA0375; Ipc   | 0.00582981 | 0.00725337 | 2.53797949 |            |
| ETNK2       | NM_018208.1 | ETNK2       | 1  | Homo sapiens              | FLJ10761; HM    | 0.00017856 | 0.00038276 | 2.53795609 |            |
| TMEM217     | XM_929843.1 | TMEM217     | 6  | Homo sapiens              | DLJ355M6.2      | 0.00662547 | 0.00807836 | 2.53711755 |            |
| USP35       | XM_942438.1 | USP35       | 11 | Homo sapiens              | ubiquitin speci | 0.03285215 | 0.03120545 | 2.5334537  |            |
| TRAF3IP1    | NM_015650.2 | TRAF3IP1    | 2  | Homo sapiens              | MIP-T3; DKFZ    | 0.00652034 | 0.00797901 | 2.53167998 |            |
| SLC25A21    | NM_030631.1 | SLC25A21    | 14 | Homo sapiens              | MGC126570; C    | 0.00087786 | 0.00143835 | 2.52536921 |            |
| ZADH2       | NM_175907.3 | ZADH2       | 18 | Homo sapiens              | MGC45594        | 6.6288E-06 | 2.767E-05  | 2.52122913 |            |
| KLK8        | NM_144507.1 | KLK8        | 19 | Homo sapiens              | NRPN; NP; HN    | 0.00127648 | 0.00197947 | 2.51958017 |            |
| RHPN1       | NM_052924.1 | RHPN1       | 8  | Homo sapiens              | ODF5; RHPN;     | 1.4862E-05 | 5.2118E-05 | 2.5171572  |            |
| C5orf41     | NM_153607.1 | C5orf41     | 5  | Homo sapiens              | DKFZp686G20     | 0.0010851  | 0.00172507 | 2.51146584 |            |
| LOC153561   | XM_936052.1 | LOC153561   |    | PREDICTED: Homo sapiens   | h               | 0.02511347 | 0.02508203 | 2.50746015 |            |
| KBTBD9      | XM_940375.1 | KBTBD9      | 2  | PREDICTED: Homo sapiens   | k               | 7.0276E-07 | 5.1859E-06 | 2.50688161 |            |
| MT1F        | NM_005949.1 | MT1F        | 16 | Homo sapiens              | MT1; MGC327     | 2.3324E-11 | 1.279E-08  | 2.50569785 |            |
| SNX33       | NM_153271.1 | SNX33       | 15 | Homo sapiens              | MGC32065; SI    | 0.00281998 | 0.00386783 | 2.50372761 |            |
| SLC30A1     | NM_021194.2 | SLC30A1     | 1  | Homo sapiens              | ZNT1; ZRC1      | 1.4743E-06 | 8.9393E-06 | 2.50368585 |            |
| MIR25       | NR_029498.1 | MIR25       |    | Homo sapiens              | microRNA 25 (   | 0.01852737 | 0.01929256 | 2.49896798 |            |
| LOC643031   | XM_926402.1 | LOC643031   | 5  | PREDICTED: Homo sapiens   | s               | 8.5676E-10 | 8.5423E-08 | 2.49873738 |            |
| TSPAN1      | NM_005727.2 | TSPAN1      | 1  | Homo sapiens              | NET-1; 90304.   | 0.01983024 | 0.02046947 | 2.49530041 |            |
| RNF121      | NM_018320.3 | RNF121      | 11 | Homo sapiens              | FLJ11099        | 1.1361E-06 | 7.3677E-06 | 2.4944975  |            |
| SENP7       | NM_00107720 | SENP7       | 3  | Homo sapiens              | KIAA1707; MC    | 0.00161459 | 0.00241295 | 2.49367254 |            |
| NLE1        | NM_018096.3 | NLE1        | 17 | Homo sapiens              | Nle; FLJ10458   | 2.5735E-05 | 7.9985E-05 | 2.49290837 |            |
| ATP8B2      | NM_00100585 | ATP8B2      | 1  | Homo sapiens              | ATPID; DKFZp    | 0.0035239  | 0.00470175 | 2.47979503 |            |
| C4orf33     | NM_173487.1 | C4orf33     | 4  | Homo sapiens              | FLJ33703        | 6.8093E-05 | 0.00017484 | 2.47343044 |            |
| TBC1D9      | NM_015130.1 | TBC1D9      | 4  | Homo sapiens              | KIAA0882; MC    | 7.0368E-05 | 0.00017964 | 2.4710738  |            |
| LRRC37A4    | NR_002940.1 | LRRC37A4    | 17 | Homo sapiens              | KIAA0563; FL    | 0.01514252 | 0.01626398 | 2.470158   |            |
| LOC644083   | XM_930110.1 | LOC644083   | 1  | PREDICTED: Homo sapiens   | h               | 0.0190222  | 0.01973756 | 2.4627281  |            |
|             | Hs.560736   | HS.560736   | 2  | UI-H-BI4-aph-d-11-0-UI.s1 | h               | 0.00413347 | 0.00540171 | 2.45818658 |            |
| CRLF1       | NM_004750.2 | CRLF1       | 19 | Homo sapiens              | CISS; CISS1;    | 1.2483E-06 | 7.8909E-06 | 2.4571128  |            |
| PPP1R13B    | NM_015316.1 | PPP1R13B    | 14 | Homo sapiens              | p53BP2-like; p  | 6.4788E-07 | 4.9089E-06 | 2.45685162 |            |
| TUFT1       | NM_020127.1 | TUFT1       | 1  | Homo sapiens              | tuftelin 1 (TUF | 2.7099E-09 | 1.4498E-07 | 2.45670892 |            |
| KCNS3       | NM_002252.3 | KCNS3       | 2  | Homo sapiens              | MGC9481; KV     | 4.0896E-06 | 1.9312E-05 | 2.45648787 |            |
| C16orf70    | NM_025187.3 | C16orf70    | 16 | Homo sapiens              | lin-10; C16orf  | 0.0019108  | 0.00278494 | 2.4548601  |            |

5.0 Upreg

|             |             |              |                                |            |            |            |
|-------------|-------------|--------------|--------------------------------|------------|------------|------------|
| C14orf78    | XM_941311.1 | C14ORF78     | PREDICTED: Homo sapiens c      | 2.0899E-08 | 5.0239E-07 | 2.45450939 |
| GM2A        | NM_000405.3 | GM2A         | 5 Homo sapiens SAP-3           | 0.00012527 | 0.00028698 | 2.45415395 |
| PPP1R12C    | NM_017607.1 | PPP1R12C     | 19 Homo sapiens p84; DKFZp43   | 2.3337E-05 | 7.4349E-05 | 2.45070336 |
| TTY5        | NR_001541.1 | TTY5         | Homo sapiens TTY5              | 0.0014841  | 0.00224935 | 2.45052828 |
| SP100       | NM_00108039 | SP100        | 2 Homo sapiens DKFZp686E07     | 0.00014928 | 0.00033067 | 2.4482979  |
| MIR1204     | NR_031609.1 | MIR1204      | Homo sapiens microRNA 120      | 0.04023901 | 0.03699257 | 2.44081941 |
| NAV3        | NM_014903.3 | NAV3         | 12 Homo sapiens unc53H3; STE   | 0.00058751 | 0.00102994 | 2.43624129 |
| LACTB       | NM_171846.1 | LACTB        | 15 Homo sapiens FLJ14902; G2   | 4.8856E-06 | 2.2039E-05 | 2.43604113 |
| CCDC28B     | NM_024296.3 | CCDC28B      | 1 Homo sapiens RP4-622L5.5;    | 0.0147077  | 0.01586103 | 2.42886499 |
| MOCS1       | NM_138928.1 | MOCS1        | 6 Homo sapiens MOCS1B; MIG     | 0.00010598 | 0.00025153 | 2.42581465 |
| KRTDAP      | NM_207392.1 | KRTDAP       | 19 Homo sapiens MGC163373; I   | 2.602E-05  | 8.0699E-05 | 2.42190521 |
| KIAA0895    | NM_015314.1 | KIAA0895     | 7 Homo sapiens KIAA0895 (KI    | 0.00049046 | 0.00088655 | 2.42000429 |
| DGKD        | NM_152879.2 | DGKD         | 2 Homo sapiens KIAA0145; dg    | 0.00061961 | 0.00107504 | 2.41889513 |
| SLC35E3     | NM_018656.2 | SLC35E3      | 12 Homo sapiens BLOV1          | 1.3617E-05 | 4.8469E-05 | 2.41467166 |
| DNAJC5      | NM_025219.1 | DNAJC5       | 20 Homo sapiens CSP; DKFZP43   | 0.00412043 | 0.00538787 | 2.41296415 |
| NOD1        | NM_006092.1 | NOD1         | 7 Homo sapiens NLR1; CARD      | 0.00167998 | 0.00249453 | 2.41273062 |
| CHMP6       | NM_024591.3 | CHMP6        | PREDICTED: Homo sapiens c      | 0.00972827 | 0.01121185 | 2.40612892 |
|             | Hs.572538   | HS.572538    | AGENCOURT_15364206 Hunr        | 0.0024334  | 0.00342103 | 2.4058307  |
| MYO1D       | NM_015194.1 | MYO1D        | 17 Homo sapiens KIAA0727; my   | 7.2622E-07 | 5.3011E-06 | 2.40547292 |
| LOC729776   | Hs.535844   | LOC729776    | 6 PREDICTED: Homo sapiens h    | 5.8071E-06 | 2.4952E-05 | 2.40493518 |
| PRPH        | NM_006262.3 | PRPH         | 12 Homo sapiens PRPH1; NEF4    | 1.6214E-07 | 1.8994E-06 | 2.40252288 |
| PTGER4      | NM_000958.2 | PTGER4       | 5 Homo sapiens EP4R; MGC12     | 0.00115471 | 0.00181893 | 2.40151447 |
| LOC10013377 | XM_00171384 | LOC100133770 | PREDICTED: Homo sapiens s      | 0.0222999  | 0.02264051 | 2.40053985 |
| C20orf108   | NM_080821.1 | C20ORF108    | 20 Homo sapiens DKFZP434A11    | 4.7425E-09 | 1.9354E-07 | 2.39834233 |
| FKBP10      | NM_021939.2 | FKBP10       | 17 Homo sapiens FLJ22041; hF   | 0.0009241  | 0.00150316 | 2.39576417 |
| ARSB        | NM_198709.1 | ARSB         | 5 Homo sapiens MPS6; ASB; G    | 0.00108631 | 0.00172606 | 2.39224092 |
| RNU1F1      | NR_004402.1 | RNU1F1       | 14 Homo sapiens UIF; HSD7      | 4.2456E-06 | 1.9867E-05 | 2.39126144 |
| LIN7C       | NM_018362.2 | LIN7C        | 11 Homo sapiens LIN-7C; MALS   | 0.01012606 | 0.01158963 | 2.3888008  |
| CHRDL2      | NM_015424.3 | CHRDL2       | 11 Homo sapiens DKFZp586N21    | 0.00355426 | 0.00473362 | 2.38574316 |
| FAM71E1     | NM_138411.1 | FAM71E1      | 19 Homo sapiens FLJ27522; FLJ  | 5.0823E-10 | 6.5576E-08 | 2.38425245 |
| RFXDC2      | NM_022841.2 | RFXDC2       | Homo sapiens MGC131836; I      | 0.00842168 | 0.0099197  | 2.38187137 |
| IFRD1       | NM_001550.2 | IFRD1        | 7 Homo sapiens PC4; TIS7       | 1.3462E-07 | 1.6707E-06 | 2.37808138 |
| CKMT1A      | NM_00101500 | CKMT1A       | 15 Homo sapiens UMTCK; CKMT    | 3.5776E-09 | 1.7343E-07 | 2.37364561 |
|             | Hs.112932   | HS.112932    | 8 ag03b01.s1 Soares_testis_NI  | 0.02024593 | 0.02083239 | 2.37136019 |
| NUMBL       | NM_004756.2 | NUMBL        | 19 Homo sapiens NUMB-R; TNR    | 0.04530056 | 0.04091272 | 2.37012153 |
| PDK3        | NM_005391.1 | PDK3         | Homo sapiens pyrumvate dehy    | 0.00034846 | 0.0006661  | 2.36987443 |
| CAMTA1      | NM_015215.1 | CAMTA1       | 1 Homo sapiens KIAA0833        | 2.2323E-07 | 2.3234E-06 | 2.36600319 |
| LOC400304   | XM_375152.3 | LOC400304    | 15 PREDICTED: Homo sapiens s   | 4.1835E-08 | 7.5996E-07 | 2.36509922 |
| LOC653066   | XM_930921.1 | LOC653066    | 2 PREDICTED: Homo sapiens s    | 0.00120098 | 0.00188068 | 2.36114374 |
| C2orf7      | NM_032319.1 | C2ORF7       | 2 Homo sapiens PAP21; MGC1     | 1.742E-06  | 1.0176E-05 | 2.36029317 |
| ITFG3       | NM_032039.1 | ITFG3        | 16 Homo sapiens FLJ32603; DK   | 3.6448E-08 | 6.9976E-07 | 2.3564996  |
| SCARNA16    | NR_003013.1 | SCARNA16     | 17 Homo sapiens ACA47          | 8.5316E-08 | 1.2192E-06 | 2.35560473 |
| XKR8        | NM_018053.2 | XKR8         | 1 Homo sapiens XRG8; FLJ103    | 0.00267964 | 0.00370838 | 2.35199642 |
| LOC728969   | XM_00113292 | LOC728969    | 1 PREDICTED: Homo sapiens s    | 9.5336E-07 | 6.4693E-06 | 2.35007229 |
| LOC651936   | XM_941213.1 | LOC651936    | PREDICTED: Homo sapiens h      | 0.03278595 | 0.03115944 | 2.34872591 |
| SLC25A20    | XM_941287.1 | SLC25A20     | PREDICTED: Homo sapiens s      | 0.00029714 | 0.00058337 | 2.34849537 |
| SALL4       | NM_020436.2 | SALL4        | 20 Homo sapiens MGC133050; I   | 0.00167425 | 0.00248727 | 2.34362759 |
| DTNA        | NM_032981.2 | DTNA         | 18 Homo sapiens D18S892E; D1   | 0.02824682 | 0.02759577 | 2.34323628 |
| SIRT7       | NM_016538.1 | SIRT7        | 17 Homo sapiens SIR2L7; MGC1   | 1.6263E-07 | 1.9E-06    | 2.34007105 |
| FLJ20489    | NM_017842.1 | FLJ20489     | 12 Homo sapiens hypothetical p | 8.2532E-05 | 0.00020514 | 2.3392625  |
| DISP1       | NM_032890.2 | DISP1        | 1 Homo sapiens DKFZP434I04;    | 0.00011123 | 0.0002608  | 2.33392189 |
| RNU1-3      | NR_004408.1 | RNU1-3       | 1 Homo sapiens U1C21           | 2.5461E-08 | 5.6844E-07 | 2.33252862 |
| LOC441711   | XR_017229.2 | LOC441711    | 15 PREDICTED: Homo sapiens n   | 0.01008866 | 0.01155587 | 2.32771481 |
| CHST12      | NM_018641.2 | CHST12       | 7 Homo sapiens C4S-2; C4ST2    | 0.00338736 | 0.00453752 | 2.32546229 |
| TRIM68      | NM_018073.5 | TRIM68       | 11 Homo sapiens MGC126176; S   | 1.581E-06  | 9.4625E-06 | 2.32347316 |
| ZNF775      | NM_173680.2 | ZNF775       | 7 Homo sapiens MGC33584        | 0.00896486 | 0.01046676 | 2.3228068  |
| EXOC1       | NM_018261.3 | EXOC1        | 4 Homo sapiens SEC3L1; Sec3    | 9.8478E-05 | 0.00023692 | 2.32003344 |
|             | Hs.555260   | HS.555260    | 17000532215901 GRN_ES H        | 0.00632843 | 0.00778106 | 2.31951719 |
| SLC6A9      | NM_201649.2 | SLC6A9       | 1 Homo sapiens DKFZp547A11     | 0.00164378 | 0.00245031 | 2.31804705 |
| FAM113A     | NM_022760.3 | FAM113A      | 20 Homo sapiens C20orf81; bA1  | 8.2604E-06 | 3.2618E-05 | 2.31493553 |
| ZNF484      | NM_031486.1 | ZNF484       | 9 Homo sapiens MGC133034; I    | 0.03871728 | 0.03586038 | 2.3101654  |
|             | Hs.565491   | HS.565491    | 2 xf55f09.x1 NCI_CGAP_Gas4     | 0.01171169 | 0.01311697 | 2.30959293 |
| OR4A16      | NM_00100527 | OR4A16       | 11 Homo sapiens OR11-117; OF   | 0.04186128 | 0.03825548 | 2.30383689 |
| GOLPH4      | NM_014498.2 | GOLPH4       | 3 Homo sapiens P138; GIMPC;    | 1.9385E-05 | 6.445E-05  | 2.30188036 |
| ZNF558      | NM_144693.1 | ZNF558       | 19 Homo sapiens FLJ30932       | 9.8967E-07 | 6.6693E-06 | 2.30020825 |
| MAP3K12     | NM_006301.2 | MAP3K12      | 12 Homo sapiens DLK; ZPKP1; Z  | 6.8336E-06 | 2.8335E-05 | 2.29568662 |
| ATP6V1C1    | NM_001695.3 | ATP6V1C1     | 8 Homo sapiens VATC; FLJ200    | 1.0376E-05 | 3.9173E-05 | 2.29473508 |
| IFIH1       | NM_022168.2 | IFIH1        | 2 Homo sapiens MDAS; MGC13     | 0.01494849 | 0.01607526 | 2.29091735 |
| RNU1G2      | NR_004426.1 | RNU1G2       | 1 Homo sapiens U1D2; U1B2;     | 4.8954E-10 | 6.5079E-08 | 2.28873417 |
| RAB18       | NM_021252.3 | RAB18        | 10 Homo sapiens RAB18L11       | 5.2603E-05 | 0.00014227 | 2.28771615 |



## 5.0 Upreg

|             |                         |                                  |            |            |            |
|-------------|-------------------------|----------------------------------|------------|------------|------------|
| C6orf203    | NM_016487.2 C6ORF203    | 6 Homo sapiens RP11-59I9.1;      | 3.986E-08  | 7.4412E-07 | 2.28729386 |
| ZSWIM6      | XM_035299.7 ZSWIM6      | 5 PREDICTED: Homo sapiens z      | 1.6731E-07 | 1.924E-06  | 2.2849851  |
| CELSR3      | NM_001407.1 CELSR3      | 3 Homo sapiens FMI1; RESDA1      | 2.1996E-07 | 2.3197E-06 | 2.28423281 |
| TRAF4       | NM_004295.2 TRAF4       | 17 Homo sapiens RNF83; MLN6;     | 0.0492341  | 0.04378471 | 2.27406425 |
| ZNF18       | NM_144680.2 ZNF18       | 17 Homo sapiens KOX11; ZKSC      | 9.2549E-06 | 3.5678E-05 | 2.27344567 |
| PARM1       | NM_015393.2 PARM1       | 4 Homo sapiens prostate andrc    | 1.3843E-09 | 1.0942E-07 | 2.27317807 |
|             | Hs.572495 HS.572495     | 17 Homo sapiens cDNA clone IM    | 0.00620038 | 0.00765364 | 2.26927751 |
| OS9         | NM_006812.2 OS9         | 12 Homo sapiens amplified in os  | 0.00013633 | 0.00030702 | 2.26776033 |
| YPEL3       | NM_031477.3 YPEL3       | 16 Homo sapiens MGC10500         | 0.00174512 | 0.00257989 | 2.26286863 |
| FAM25A      | XM_00172378 FAM25A      | PREDICTED: Homo sapiens fi       | 0.04673356 | 0.04193498 | 2.26188726 |
| ZC3H10      | NM_032786.1 ZC3H10      | 12 Homo sapiens FLJ14451; ZC     | 2.8288E-05 | 8.624E-05  | 2.25979066 |
| ULBP2       | NM_025217.2 ULBP2       | 6 Homo sapiens RAET1H; N2DI      | 1.4607E-08 | 4.0175E-07 | 2.25448402 |
| H2AFJ       | NM_177925.1 H2AFJ       | 12 Homo sapiens FLJ10903; MG     | 1.3865E-07 | 1.7014E-06 | 2.25425923 |
| LOC728170   | XR_015330.2 LOC728170   | 12 PREDICTED: Homo sapiens n     | 0.04449524 | 0.04028908 | 2.24597544 |
| PRF1        | NM_005041.3 PRF1        | 10 Homo sapiens HPLH2; FLH2;     | 0.00285714 | 0.00391329 | 2.24376784 |
| PMS2L3      | NM_00100368 PMS2L3      | 7 Homo sapiens PMS5; MGC12       | 1.9828E-05 | 6.5452E-05 | 2.23913542 |
| CEBPA       | NM_004364.2 CEBPA       | 19 Homo sapiens CEBP; C/EBP-;    | 4.535E-06  | 2.0822E-05 | 2.23803654 |
| SLCO1B3     | NM_019844.1 SLCO1B3     | 12 Homo sapiens LST-3TM13; S     | 5.1427E-05 | 0.00013983 | 2.23641615 |
| ODF2L       | NM_020729.1 ODF2L       | 1 Homo sapiens MGC111060; c      | 0.03258926 | 0.03102627 | 2.23564046 |
| FAM195B     | NM_207368.1 FAM195B     | 17 Homo sapiens DKFZp686A17      | 5.332E-07  | 4.2881E-06 | 2.2329548  |
| PRSS22      | NM_022119.3 PRSS22      | 16 Homo sapiens hBSSP-4; MGC     | 0.0025257  | 0.00352537 | 2.2314088  |
| MICA        | NM_000247.1 MICA        | 6 Homo sapiens PERB11.1; MG      | 5.7603E-07 | 4.5166E-06 | 2.23133653 |
| FAM8A1      | NM_016255.1 FAM8A1      | 6 Homo sapiens FLJ23721; AH      | 1.8252E-06 | 1.0515E-05 | 2.23108703 |
| ZDHHC11     | XM_940764.1 ZDHHC11     | 5 Homo sapiens ZNF399; FLJ1      | 2.8296E-05 | 8.6206E-05 | 2.23090998 |
| LYSMD4      | NM_152449.2 LYSMD4      | 15 Homo sapiens MGC99501; Fl     | 7.3824E-08 | 1.0997E-06 | 2.23002732 |
| SMARCA2     | NM_003070.3 SMARCA2     | 9 Homo sapiens Sth1p; SNF2L      | 1.9848E-06 | 1.1171E-05 | 2.22931896 |
| GPR176      | NM_007223.1 GPR176      | 15 Homo sapiens Gm1012; GPR      | 0.04890603 | 0.04355034 | 2.22792215 |
| TMEM45A     | NM_018004.1 TMEM45A     | 3 Homo sapiens DERP7; FLJ10      | 3.9463E-06 | 1.8767E-05 | 2.22544501 |
| DGCR14      | NM_022719.1 DGCR14      | 22 Homo sapiens ES2; DGS1; D     | 7.1404E-05 | 0.00018186 | 2.22168343 |
| ST3GAL5     | NM_003896.2 ST3GAL5     | 2 Homo sapiens SIAT9; ST3Ga      | 5.6388E-07 | 4.4572E-06 | 2.22123681 |
| FAM116B     | NM_00100179 FAM116B     | Homo sapiens MGC33692            | 3.5633E-07 | 3.2265E-06 | 2.21636588 |
| CORO7       | NM_024535.1 CORO7       | 16 Homo sapiens LOC22021; O6:    | 5.8132E-05 | 0.00015363 | 2.21604204 |
| ZNF23       | NM_145911.1 ZNF23       | 16 Homo sapiens KOX16; Zfp61     | 3.1917E-07 | 3.0015E-06 | 2.21312567 |
| C11orf61    | NM_024631.1 C11ORF61    | 11 Homo sapiens FLJ23342         | 0.01379042 | 0.01502696 | 2.21177786 |
| GRRP1       | NM_024869.1 GRRP1       | 1 Homo sapiens RP11-96L14.5      | 0.02588055 | 0.02567571 | 2.20883933 |
| ZNF532      | NM_018181.4 ZNF532      | 18 Homo sapiens FLJ10697         | 9.847E-07  | 6.646E-06  | 2.20880825 |
| TRAPPC2     | NM_00101165 TRAPPC2     | Homo sapiens hYP38334; TR        | 2.5695E-05 | 7.9888E-05 | 2.20520077 |
| LRTOMT      | NM_145309.1 LRTOMT      | 11 Homo sapiens leucine rich tra | 7.5582E-05 | 0.00019056 | 2.2040559  |
| KIAA1539    | NM_025182.2 KIAA1539    | 9 Homo sapiens P1.11659_5; F     | 3.7984E-05 | 0.00010941 | 2.202708   |
| LOC10012827 | XM_00172555 LOC10012827 | 9 PREDICTED: Homo sapiens h      | 0.0001292  | 0.0002943  | 2.20192162 |
| ABHD6       | NM_020676.4 ABHD6       | 3 Homo sapiens abhydrolase d     | 2.9814E-08 | 6.184E-07  | 2.19892318 |
| CD82        | NM_002231.3 CD82        | 11 Homo sapiens SAR2; TSPAN2     | 0.00043688 | 0.00080445 | 2.19783296 |
| DERPC       | NM_017804.3 DERPC       | 16 Homo sapiens FLJ20400; CTI    | 0.00011178 | 0.00026161 | 2.19495982 |
| LOC642869   | XM_926257.1 LOC642869   | PREDICTED: Homo sapiens s        | 0.04954788 | 0.04399687 | 2.19439481 |
| FAM46B      | NM_052943.2 FAM46B      | 1 Homo sapiens MGC16491; M       | 1.4795E-07 | 1.7758E-06 | 2.19434101 |
| LOC401152   | NM_00100170 LOC401152   | 4 Homo sapiens HCV F-transac     | 0.00294812 | 0.00402159 | 2.18920283 |
| MTF1        | NM_005955.1 MTF1        | 1 Homo sapiens MGC23036; ZI      | 5.3372E-07 | 4.2884E-06 | 2.18497948 |
| GPR137B     | NM_003272.1 GPR137B     | 1 Homo sapiens TMSF1             | 0.00077721 | 0.00129964 | 2.18242052 |
| FSTL3       | NM_005860.1 FSTL3       | 19 Homo sapiens FLRG; FSRP       | 4.1501E-05 | 0.00011739 | 2.18189931 |
| NUDT7       | NM_00110566 NUDT7       | 16 Homo sapiens nudix (nucleos   | 4.214E-09  | 1.8304E-07 | 2.18015994 |
| TOR1B       | NM_014506.1 TOR1B       | 9 Homo sapiens DQ1; MGC438       | 2.8262E-06 | 1.4552E-05 | 2.1769278  |
| TMEM194B    | NM_00114264 TMEM194B    | 2 Homo sapiens transmembrar      | 0.02090843 | 0.02140364 | 2.1751102  |
| HS1BP3      | NM_022460.3 HS1BP3      | 2 Homo sapiens ETM2; FLJ142      | 8.4948E-08 | 1.2159E-06 | 2.17331552 |
| LOC643662   | XM_926967.1 LOC643662   | 12 PREDICTED: Homo sapiens h     | 0.04988928 | 0.04424182 | 2.17307451 |
| CECR7       | XM_927968.1 CECR7       | 22 PREDICTED: Homo sapiens c     | 0.00028102 | 0.00055596 | 2.17138319 |
| HTR7        | NM_000872.3 HTR7        | 10 Homo sapiens 5-HT7            | 0.00882528 | 0.01032854 | 2.16903552 |
| LOC10013256 | XM_00171397 LOC10013256 | 11 PREDICTED: Homo sapiens s     | 0.01477459 | 0.01592143 | 2.16830191 |
| GALT        | NM_000155.2 GALT        | 9 Homo sapiens galactose-1-pl    | 0.00012883 | 0.00029375 | 2.16724112 |
|             | Hs.561599 HS.561599     | UI-E-E01-aiz-a-04-0-UI.r1 U      | 0.04271243 | 0.03892386 | 2.1657349  |
| NICN1       | NM_032316.2 NICN1       | 3 Homo sapiens MGC12936          | 1.9669E-05 | 6.5173E-05 | 2.16397694 |
| FAM13B      | NM_00110180 FAM13B      | 5 Homo sapiens KHCHP; MGC5       | 1.1112E-08 | 3.3971E-07 | 2.16357344 |
| ENPEP       | NM_001977.2 ENPEP       | 4 Homo sapiens APA; gp160; C     | 0.00723698 | 0.00870541 | 2.16087346 |
| CTNS        | NM_004937.1 CTNS        | 17 Homo sapiens CTNS-LSB; PQ     | 0.00010984 | 0.00025832 | 2.15987708 |
| UNC13B      | NM_006377.2 UNC13B      | 9 Homo sapiens hmunc13; Unc      | 0.00402329 | 0.00527895 | 2.15960887 |
| ZNF326      | NM_181781.2 ZNF326      | 1 Homo sapiens FLJ20403; dJ8     | 0.0224401  | 0.02276178 | 2.15937512 |
| ABHD15      | NM_198147.1 ABHD15      | 17 Homo sapiens abhydrolase dJ   | 8.8173E-06 | 3.4307E-05 | 2.15666274 |
| NAPB        | NM_022080.1 NAPB        | 20 Homo sapiens SNAP-BETA; N     | 1.6265E-06 | 9.6754E-06 | 2.15279245 |
| GPR108      | NM_00108045 GPR108      | 19 Homo sapiens LUSTR2; MGC      | 5.0598E-06 | 2.2558E-05 | 2.15003804 |
| DDAH2       | NM_013974.1 DDAH2       | 6 Homo sapiens DDAHII; NG3C      | 0.00099239 | 0.00159737 | 2.14868913 |
| CSRNP2      | NM_030809.1 CSRNP2      | 12 Homo sapiens FLJ25576; C1:    | 1.7156E-07 | 1.9549E-06 | 2.14764136 |

5.0 Upreg

|             |                         |                                |            |            |            |
|-------------|-------------------------|--------------------------------|------------|------------|------------|
| C11orf63    | NM_024806.2 C11ORF63    | 11 Homo sapiens FLJ23554       | 0.00679728 | 0.008258   | 2.14692294 |
|             | Hs.483906 HS.483906     | Homo sapiens mRNA; cDNA I      | 1.2854E-05 | 4.6413E-05 | 2.14460015 |
| TBC1D2      | NM_018421.2 TBC1D2      | 9 Homo sapiens FLJ10702; DK    | 0.00054975 | 0.00097623 | 2.14319238 |
| CCDC127     | NM_145265.2 CCDC127     | 5 Homo sapiens FLJ25701        | 0.02356632 | 0.02375039 | 2.14317563 |
|             | Hs.4988 HS.4988         | 2 Homo sapiens mRNA; cDNA I    | 1.2025E-08 | 3.5405E-07 | 2.14185925 |
| GNB3        | NM_002075.2 GNB3        | 12 Homo sapiens guanine nucle  | 0.00685511 | 0.008311   | 2.13395485 |
| UNC13D      | NM_199242.1 UNC13D      | 17 Homo sapiens Munc13-4; FH   | 0.03045698 | 0.02935943 | 2.13364073 |
| PLXNA1      | NM_032242.2 PLXNA1      | 3 Homo sapiens NOV; PLXN1; I   | 9.9805E-07 | 6.7E-06    | 2.13076031 |
| SNAP29      | NM_004782.2 SNAP29      | 22 Homo sapiens CEDNIK; SNAI   | 2.9546E-06 | 1.5063E-05 | 2.12950995 |
| C17orf28    | NM_030630.1 C17ORF28    | 17 Homo sapiens FLJ43526; DM   | 0.00213693 | 0.00306713 | 2.12905207 |
| C5orf13     | NM_004772.1 C5ORF13     | 5 Homo sapiens PTZ17; D4S11    | 0.00554155 | 0.00694197 | 2.12863096 |
| LOC653438   | XM_929895.1 LOC653438   | 1 PREDICTED: Homo sapiens s    | 4.2424E-06 | 1.9863E-05 | 2.12812236 |
| KCTD20      | NM_173562.3 KCTD20      | 6 Homo sapiens MGC14254; d     | 1.1429E-06 | 7.3895E-06 | 2.12738747 |
| FLJ22795    | NM_025084.1 FLJ22795    | 15 Homo sapiens hypothetical p | 2.6509E-08 | 5.7857E-07 | 2.12620517 |
| C9orf45     | NM_030814.4 C9ORF45     | 9 PREDICTED: Homo sapiens c    | 1.4165E-05 | 5.0174E-05 | 2.12590558 |
| LOC162073   | NM_00103484 LOC162073   | 16 Homo sapiens MGC126798; I   | 0.00022649 | 0.00046495 | 2.12370005 |
| LOC10013446 | XM_00172128 LOC10013446 | 7 PREDICTED: Homo sapiens h    | 0.02217511 | 0.02253207 | 2.12362745 |
| LOC645166   | XM_00112944 LOC645166   | 1 PREDICTED: Homo sapiens s    | 3.7635E-09 | 1.7564E-07 | 2.12341263 |
| CREB3L4     | NM_130898.2 CREB3L4     | 1 Homo sapiens hJAL; CREB4;    | 0.00569741 | 0.00711285 | 2.12329459 |
| LOC729065   | XM_00112920 LOC729065   | 4 PREDICTED: Homo sapiens h    | 0.01332944 | 0.01460993 | 2.12259673 |
| FBXO17      | NM_148169.1 FBXO17      | 19 Homo sapiens FBXO26; MGC    | 0.00068439 | 0.00116576 | 2.12161977 |
| FKBP1B      | NM_054033.1 FKBP1B      | 2 Homo sapiens FKBP12.6; FK    | 0.00187005 | 0.00273555 | 2.11737478 |
| DCAF16      | NM_017741.2 DCAF16      | 4 Homo sapiens FLJ20280; MG    | 0.00803381 | 0.00952035 | 2.11681636 |
| AHNAK2      | NM_138420.2 AHNAK2      | 14 Homo sapiens KIAA2019; C1   | 1.1748E-07 | 1.5316E-06 | 2.11625496 |
| LOC649970   | XM_939056.1 LOC649970   | PREDICTED: Homo sapiens s      | 3.0974E-09 | 1.5801E-07 | 2.11444301 |
|             | Hs.561144 HS.561144     | 3 UI-E-EJ0-ahn-e-19-0-UI.s1 L  | 0.04509637 | 0.04074508 | 2.11316168 |
| B4GALNT1    | NM_001478.2 B4GALNT1    | 12 Homo sapiens GALGT; GALN/   | 0.00131866 | 0.00203481 | 2.10943705 |
| LOC728901   | XR_015891.2 LOC728901   | 17 PREDICTED: Homo sapiens n   | 0.02912078 | 0.02829208 | 2.10856093 |
| NRGN        | NM_006176.1 NRGN        | 11 Homo sapiens RC3; hng       | 4.9753E-08 | 8.46E-07   | 2.10587807 |
| KIFAP3      | NM_014970.2 KIFAP3      | 1 Homo sapiens SMAP; Smg-G     | 4.2701E-08 | 7.6461E-07 | 2.10275724 |
| IPO13       | NM_014652.2 IPO13       | 1 Homo sapiens RANBP13; KIA    | 2.1636E-05 | 6.9948E-05 | 2.10082502 |
| GOSR2       | NM_054022.2 GOSR2       | 17 Homo sapiens GS27; MEMBR    | 0.00010908 | 0.0002568  | 2.10036425 |
| MPP1        | NM_002436.2 MPP1        | Homo sapiens ANG12; EMP5!      | 1.7709E-05 | 5.9992E-05 | 2.09939134 |
| LRRC8A      | NM_019594.2 LRRC8A      | 9 Homo sapiens FLJ10337; KIA   | 5.7631E-05 | 0.00015277 | 2.09714265 |
| HIST1H1C    | NM_005319.3 HIST1H1C    | 6 Homo sapiens MGC3992; H1     | 1.1325E-08 | 3.4265E-07 | 2.09693487 |
| LOC728312   | XR_042486.1 LOC728312   | PREDICTED: Homo sapiens n      | 0.0003187  | 0.0006181  | 2.09541689 |
| GRIN1       | NM_000832.5 GRIN1       | 9 Homo sapiens NMDAR1; NMI     | 1.2537E-07 | 1.5965E-06 | 2.09494902 |
| MPZL1       | NM_024569.3 MPZL1       | 1 Homo sapiens PZR; PZRa; Pz   | 7.3263E-08 | 1.0951E-06 | 2.09383551 |
| MLF1        | NM_022443.2 MLF1        | 3 Homo sapiens myeloid leuke   | 3.1126E-06 | 1.5597E-05 | 2.09378488 |
| LOC10013193 | XM_00172084 LOC10013193 | PREDICTED: Homo sapiens s      | 0.03983837 | 0.03671658 | 2.09062092 |
| PCYOX1L     | NM_024028.2 PCYOX1L     | 5 Homo sapiens MGC3265         | 2.1376E-05 | 6.944E-05  | 2.09025567 |
| GLDN        | NM_181789.1 GLDN        | 15 Homo sapiens CRG-L2; UNC-   | 2.3049E-05 | 7.362E-05  | 2.08788418 |
| MCOLN1      | NM_020533.1 MCOLN1      | 19 Homo sapiens MSTP080; TRF   | 1.635E-05  | 5.639E-05  | 2.08718353 |
| SNORD13     | Hs.583806 SNORD13       | 8 Homo sapiens U13             | 7.1132E-08 | 1.0761E-06 | 2.08639478 |
| CSPG4       | NM_001897.3 CSPG4       | 15 Homo sapiens MSK16; MCSP    | 0.00309588 | 0.00419898 | 2.08497929 |
| CYTH1       | NM_017456.2 CYTH1       | 17 Homo sapiens FLJ41900; D1   | 2.8857E-06 | 1.4763E-05 | 2.08048888 |
| LPPR2       | NM_022737.1 LPPR2       | 19 Homo sapiens FLJ13055; DK   | 8.6596E-05 | 0.00021372 | 2.07895989 |
| HOXC4       | NM_014620.2 HOXC4       | 12 Homo sapiens cp19; HOX3E;   | 0.02411844 | 0.02423445 | 2.0779328  |
| LOC652968   | NM_00103766 LOC652968   | 22 Homo sapiens hypothetical p | 0.00441121 | 0.00569009 | 2.07569792 |
| CRIP2       | NM_001312.2 CRIP2       | 14 Homo sapiens CRP2; CRIP; E  | 7.7714E-08 | 1.146E-06  | 2.0755279  |
| ADAMTSL5    | NM_213604.1 ADAMTSL5    | 19 Homo sapiens THSD6          | 0.00044299 | 0.00081279 | 2.07489389 |
| SNORA40     | NR_002973.1 SNORA40     | 11 Homo sapiens ACA40          | 0.04561718 | 0.04116901 | 2.07298779 |
| VPS13A      | NM_033305.2 VPS13A      | 9 Homo sapiens KIAA0986; CH    | 1.2431E-06 | 7.8749E-06 | 2.07114033 |
| SUZ12P      | XM_934900.1 SUZ12P      | 17 PREDICTED: Homo sapiens s   | 0.00588749 | 0.00730958 | 2.07105782 |
| TAF5L       | NM_014409.3 TAF5L       | 1 Homo sapiens PAF65B          | 0.0297152  | 0.02878352 | 2.06830137 |
| CACNA1A     | NM_000068.2 CACNA1A     | 19 Homo sapiens FHM; CAV2.1;   | 0.0269209  | 0.02653381 | 2.06616111 |
| CYB561D2    | NM_007022.3 CYB561D2    | 3 Homo sapiens TSP10; 101F6    | 9.2608E-05 | 0.00022564 | 2.06516055 |
| HEXDC       | NM_173620.1 HEXDC       | 17 Homo sapiens FLJ23825       | 3.7464E-06 | 1.7972E-05 | 2.0651199  |
| LOC727896   | XR_038192.1 LOC727896   | PREDICTED: Homo sapiens n      | 0.05245201 | 0.04610438 | 2.06466809 |
| WDR37       | NM_014023.3 WDR37       | 10 Homo sapiens KIAA0982; RP   | 1.4037E-07 | 1.7153E-06 | 2.06431277 |
| XPA         | NM_000380.2 XPA         | 9 Homo sapiens XP1; XPAC       | 0.01138302 | 0.0128028  | 2.0614181  |
| SNAP23      | NM_003825.2 SNAP23      | 15 Homo sapiens SNAP23A; SNA   | 0.00036081 | 0.00068582 | 2.060291   |
| FBXL2       | NM_012157.2 FBXL2       | 3 Homo sapiens FBL2; FBL3; D   | 4.0477E-07 | 3.5059E-06 | 2.06009265 |
| USP41       | XM_036729.4 USP41       | 22 PREDICTED: Homo sapiens u   | 0.03456926 | 0.03259303 | 2.05766082 |
| C7orf38     | NM_145111.2 C7ORF38     | 7 Homo sapiens FLJ36794; DK    | 7.4426E-05 | 0.00018792 | 2.05584645 |
| CXorf40A    | NM_178124.3 CXORF40A    | Homo sapiens EOLA1; CXorf4     | 2.2446E-05 | 7.2088E-05 | 2.05371158 |
| AOAH        | NM_001637.1 AOAH        | 7 Homo sapiens acylxoyacyl hy  | 0.00019367 | 0.00040996 | 2.0537104  |
| LOC10012938 | NR_024490.1 LOC10012938 | 15 Homo sapiens hypothetical L | 0.04939085 | 0.04389742 | 2.0536962  |
| UBE2W       | NM_018299.2 UBE2W       | 8 Homo sapiens FLJ11011; hUI   | 0.0006504  | 0.00111785 | 2.04790771 |
|             | Hs.571245 HS.571245     | 7 603034918F1 NIH_MGC_115      | 0.00613964 | 0.00759149 | 2.0459156  |

## 5.0 Upreg

|             |                         |                                |            |            |            |
|-------------|-------------------------|--------------------------------|------------|------------|------------|
| SCARNA9     | NR_002569.1 SCARNA9     | 11 Homo sapiens Z32; mgU2-19   | 6.7005E-08 | 1.0369E-06 | 2.0450786  |
|             | Hs.572073 HS.572073     | 11 603178081F1 NIH_MGC_121     | 0.00263263 | 0.00365254 | 2.04371825 |
| SPIRE2      | NM_032451.1 SPIRE2      | 16 Homo sapiens MGC117166; 9   | 5.9843E-06 | 2.5563E-05 | 2.04371102 |
| RASA4P      | NR_024116.2 RASA4P      | 7 Homo sapiens RAS p21 prote   | 0.00461074 | 0.00591874 | 2.04035394 |
| ETFDH       | NM_004453.1 ETFDH       | 4 Homo sapiens MADD; ETFQO     | 1.3423E-07 | 1.6705E-06 | 2.03727789 |
| MOAP1       | NM_022151.4 MOAP1       | 14 Homo sapiens MAP-1; PNMA4   | 3.2985E-08 | 6.6227E-07 | 2.02962094 |
| NUBP2       | NM_012225.1 NUBP2       | 16 Homo sapiens CFD1; NUBP1    | 0.00391513 | 0.00515244 | 2.02693204 |
| MTL5        | NM_00103965.MTL5        | 11 Homo sapiens TESMIN; MTLT   | 0.00133561 | 0.00205771 | 2.02613933 |
| CLDN14      | NM_144492.1 CLDN14      | 21 Homo sapiens DFNB29         | 0.00028176 | 0.0005573  | 2.025673   |
| GFOD1       | NM_018988.1 GFOD1       | 6 Homo sapiens glucose-fructo  | 1.1875E-05 | 4.3684E-05 | 2.025487   |
| MGC3020     | NM_024048.2 MGC3020     | 16 Homo sapiens hypothetical p | 0.04392859 | 0.03986239 | 2.02431035 |
| YPEL5       | NM_016061.1 YPEL5       | 2 Homo sapiens CGI-127         | 4.9226E-09 | 1.9903E-07 | 2.02358448 |
| GNAI3       | NM_006496.1 GNAI3       | 1 Homo sapiens FLJ26559; 87L   | 0.00012011 | 0.00027697 | 2.02292858 |
| LOC10013232 | XM_00172061 LOC10013232 | 9 PREDICTED: Homo sapiens h    | 0.00019707 | 0.00041484 | 2.02279729 |
| SNORD3D     | NR_006882.1 SNORD3D     | 17 Homo sapiens U3-4           | 4.0471E-09 | 1.8025E-07 | 2.02272715 |
| TSPAN13     | NM_014399.3 TSPAN13     | 7 Homo sapiens FLJ22934; NE    | 3.1428E-10 | 5.6275E-08 | 2.02270482 |
| FAM43A      | NM_153690.4 FAM43A      | 3 Homo sapiens FLJ90022        | 9.8641E-05 | 0.00023725 | 2.01848755 |
| HBEGF       | NM_001945.1 HBEGF       | 5 Homo sapiens DTS; DTSF; HI   | 5.1412E-07 | 4.1845E-06 | 2.01500612 |
| C7orf36     | NM_020192.1 C7ORF36     | 7 Homo sapiens GK003           | 3.5231E-06 | 1.7211E-05 | 2.01372214 |
| KRTAP2-2    | XM_496261.2 KRTAP2-2    | PREDICTED: Homo sapiens k      | 0.0001529  | 0.00033757 | 2.01250557 |
| FAM73B      | NM_032809.2 FAM73B      | 9 Homo sapiens C9orf54; FLJ1   | 0.00033953 | 0.0006523  | 2.01136268 |
| LOC645236   | XM_928275.1 LOC645236   | 7 PREDICTED: Homo sapiens s    | 3.5094E-05 | 0.00010302 | 2.01068233 |
| KRT18P44    | XM_00172046 KRT18P44    | PREDICTED: Homo sapiens k      | 0.00957654 | 0.01106314 | 2.00850584 |
| PI4KAP1     | XM_942088.1 PI4KAP1     | 22 Homo sapiens FLJ39405       | 2.3504E-05 | 7.4747E-05 | 2.00567486 |
| CENTB2      | NM_012287.3 CENTB2      | 3 Homo sapiens KIAA0041; CN    | 0.02349867 | 0.02369855 | 2.00236072 |
| REEP1       | NM_022912.1 REEP1       | 2 Homo sapiens SPG31; C2orf    | 1.1386E-07 | 1.509E-06  | 2.00137998 |
| HABP4       | NM_014282.1 HABP4       | 9 Homo sapiens SERBP1L; IHA    | 1.9222E-09 | 1.2681E-07 | 2.00130519 |
| ARHGEF17    | NM_014786.2 ARHGEF17    | 11 Homo sapiens KIAA0337; P1   | 0.0364947  | 0.03412239 | 2.00007393 |
| MED26       | NM_004831.3 MED26       | 19 Homo sapiens CRSP70; CRSF   | 0.00425069 | 0.00552036 | 1.99970644 |
| SOX8        | NM_014587.2 SOX8        | 16 Homo sapiens MGC24837       | 1.0688E-07 | 1.4517E-06 | 1.99844645 |
| SLC29A4     | NM_00104066 SLC29A4     | 7 Homo sapiens PMAT; FLJ349    | 1.3754E-08 | 3.868E-07  | 1.99621996 |
| LOC221442   | NM_00101087 LOC221442   | 6 Homo sapiens FLJ46432        | 0.04614246 | 0.04150645 | 1.9954617  |
| RREB1       | NM_00100369 RREB1       | 6 Homo sapiens ras responsive  | 0.00227624 | 0.00323639 | 1.9942126  |
| CHD3        | NM_005852.2 CHD3        | 17 Homo sapiens Mi2-ALPHA; M   | 0.05391932 | 0.04726155 | 1.99380028 |
| ERI3        | NM_024066.1 ERI3        | 1 Homo sapiens MGC2683; PIN    | 0.00031167 | 0.00060675 | 1.99363865 |
| TMEM184A    | NM_152689.2 TMEM184A    | 7 Homo sapiens MGC9712; FLJ    | 0.00485478 | 0.00618586 | 1.99240245 |
| KLK3        | NM_001023005 KLK3       | 19 Homo sapiens hK3; APS; PS/  | 0.02387781 | 0.02401741 | 1.99122904 |
| SLC31A2     | NM_001860.1 SLC31A2     | 9 Homo sapiens hCTR2; CTR2;    | 0.00025735 | 0.00051788 | 1.99121692 |
| CERCAM      | NM_016174.3 CERCAM      | 9 Homo sapiens CEECAM1; MG     | 0.01751211 | 0.01841899 | 1.99121441 |
| IRF2BP2     | NM_182972.1 IRF2BP2     | 1 Homo sapiens MGC72189        | 3.073E-07  | 2.9243E-06 | 1.9910623  |
| OGFRL1      | NM_024576.3 OGFRL1      | 6 Homo sapiens dJ331H24.1; F   | 0.00516544 | 0.00652861 | 1.98955784 |
| RIPK4       | NM_020639.2 RIPK4       | 21 Homo sapiens MGC129992; 1   | 0.00051291 | 0.00091917 | 1.98854882 |
| VASN        | NM_138440.1 VASN        | 16 Homo sapiens SLITL2         | 5.1217E-09 | 2.0151E-07 | 1.98578802 |
| NEDD4L      | NM_015277.2 NEDD4L      | 18 Homo sapiens FLJ33870; KIA  | 8.639E-05  | 0.0002134  | 1.985665   |
| LOC649917   | XR_036859.1 LOC649917   | PREDICTED: Homo sapiens n      | 4.2867E-05 | 0.00012036 | 1.98473668 |
| C12orf49    | NM_024738.1 C12ORF49    | 12 Homo sapiens FLJ21415       | 0.01983629 | 0.02047091 | 1.98367884 |
| LOC402509   | XM_935493.1 LOC402509   | PREDICTED: Homo sapiens s      | 3.1255E-07 | 2.9583E-06 | 1.98336352 |
| PUS3        | NM_031307.2 PUS3        | 11 Homo sapiens FKSG32; FLJ2   | 1.5965E-07 | 1.8778E-06 | 1.98277667 |
| RHOU        | NM_021205.4 RHOU        | 1 Homo sapiens WRCH1; CDC4     | 0.00026149 | 0.00052512 | 1.98097925 |
| CPLX1       | NM_006651.3 CPLX1       | 4 Homo sapiens CPX-1; CPX1     | 0.00048082 | 0.00087127 | 1.97982173 |
| MYCBP2      | NM_015057.2 MYCBP2      | 13 Homo sapiens FLJ21597; PAI  | 2.9787E-07 | 2.8657E-06 | 1.97848128 |
| HERC1       | NM_003922.2 HERC1       | 15 Homo sapiens p619; p532     | 2.2106E-07 | 2.3145E-06 | 1.97400766 |
| ZCCHC24     | NM_153367.1 ZCCHC24     | 10 Homo sapiens FLJ90798       | 0.00024609 | 0.00049901 | 1.97278638 |
| SH3BP5L     | NM_030645.1 SH3BP5L     | 1 Homo sapiens FLJ33845; KIA   | 4.0477E-07 | 3.5093E-06 | 1.97235505 |
| GHDC        | NM_032484.3 GHDC        | 17 Homo sapiens D11LGP1; LGF   | 2.2618E-05 | 7.2587E-05 | 1.97227708 |
| HCCS        | NM_005333.2 HCCS        | Homo sapiens MCOP57; DKF       | 8.223E-07  | 5.8091E-06 | 1.97226243 |
| RMND5B      | NM_022762.3 RMND5B      | 5 Homo sapiens FLJ22318; DK    | 0.00152317 | 0.00229588 | 1.97107757 |
| RNU1A3      | NR_004430.1 RNU1A3      | 1 Homo sapiens HSD1; U1A1      | 1.6062E-09 | 1.1365E-07 | 1.96665606 |
| CTAGE5      | NM_203356.1 CTAGE5      | 14 Homo sapiens MEA6; MGEA;    | 0.00613077 | 0.00758159 | 1.96608347 |
| OSGEPL1     | NM_022353.1 OSGEPL1     | 2 Homo sapiens O-sialoglycopr  | 0.00343322 | 0.00459263 | 1.9635629  |
| RIT1        | NM_006912.3 RIT1        | 1 Homo sapiens MGC125865; I    | 0.02848954 | 0.02778031 | 1.96148922 |
| STX1A       | NM_004603.1 STX1A       | 7 Homo sapiens HPC-1; STX1;    | 5.021E-09  | 1.9844E-07 | 1.96137721 |
| C7orf41     | NM_152793.1 C7ORF41     | 7 Homo sapiens FLJ25903; Ells  | 1.3453E-07 | 1.672E-06  | 1.96029647 |
| PCYT2       | NM_002861.1 PCYT2       | 17 Homo sapiens ET             | 5.359E-06  | 2.3475E-05 | 1.95976918 |
| FAM149B1    | NM_173348.1 FAM149B1    | 10 Homo sapiens family with se | 4.8685E-06 | 2.1985E-05 | 1.95855507 |
| BAIAP2      | NM_017450.1 BAIAP2      | 17 Homo sapiens IRSP53; BAP2   | 3.5026E-08 | 6.906E-07  | 1.95655616 |
| LOC92659    | NR_015454.1 LOC92659    | 17 Homo sapiens hypothetical L | 3.5686E-07 | 3.2212E-06 | 1.95390516 |
| LOC643896   | NM_00110138 LOC643896   | 2 Homo sapiens similar to cAM  | 0.03698928 | 0.03451861 | 1.95337726 |
| PPP1R14C    | NM_030949.1 PPP1R14C    | 6 Homo sapiens KEPI; NY-BR-8   | 7.8899E-08 | 1.1576E-06 | 1.95273873 |
| ARHGAP29    | NM_004815.2 ARHGAP29    | 1 Homo sapiens RP11-255E17.    | 0.00268156 | 0.00370987 | 1.95050847 |

5.0 Upreg

|             |             |             |    |                         |                 |            |            |            |
|-------------|-------------|-------------|----|-------------------------|-----------------|------------|------------|------------|
| GSDMB       | NM_018530.1 | GSDMB       | 17 | Homo sapiens            | PRO2521; PP4    | 3.1449E-09 | 1.5858E-07 | 1.95043321 |
| APOBEC3H    | NM_181773.2 | APOBEC3H    | 22 | Homo sapiens            | dJ742C19.2; /   | 0.00032622 | 0.00063032 | 1.94779118 |
| TBC1D7      | NM_016495.2 | TBC1D7      | 6  | Homo sapiens            | DKFZp686N23     | 2.2986E-07 | 2.3699E-06 | 1.94523632 |
| SLC25A44    | NM_014655.1 | SLC25A44    | 1  | Homo sapiens            | FLJ90431; KIA   | 4.0623E-08 | 7.488E-07  | 1.94234885 |
| FTO         | NM_00108043 | FTO         | 16 | Homo sapiens            | KIAA1752; MC    | 0.00020783 | 0.00043365 | 1.94098657 |
| KLHL29      | XM_00171745 | KLHL29      | 2  | PREDICTED: Homo sapiens | k               | 2.6264E-08 | 5.7466E-07 | 1.9391487  |
| IGHMBP2     | NM_002180.1 | IGHMBP2     | 11 | Homo sapiens            | SMARD1; SML     | 0.01063453 | 0.01209115 | 1.93853179 |
| HSDL1       | NM_031463.3 | HSDL1       | 16 | Homo sapiens            | MGC125994; I    | 5.257E-06  | 2.3202E-05 | 1.93778528 |
| RN5S9       | NR_023371.1 | RN5S9       | 1  | Homo sapiens            | RNA, 5S ribos   | 4.6154E-07 | 3.8567E-06 | 1.93610213 |
| LASS5       | NM_147190.1 | LASS5       | 12 | Homo sapiens            | Trh4; MGC454    | 7.8124E-05 | 0.00019585 | 1.9302936  |
| MT1X        | NM_005952.2 | MT1X        | 16 | Homo sapiens            | MT1; MT-1l      | 1.0357E-11 | 7.5725E-09 | 1.92909033 |
| GMPPB       | NM_021971.1 | GMPPB       | 3  | Homo sapiens            | KIAA1851        | 1.4853E-05 | 5.2107E-05 | 1.92778293 |
| PCTP        | NM_021213.1 | PCTP        | 17 | Homo sapiens            | STARD2          | 1.421E-06  | 8.7127E-06 | 1.92401047 |
| CDC14B      | NM_033332.1 | CDC14B      | 9  | Homo sapiens            | CDC14B3; hCl    | 6.0326E-07 | 4.6512E-06 | 1.9232374  |
| FOXO1       | NM_002015.2 | FOXO1       | 13 | Homo sapiens            | FKHR; FKH1; I   | 0.00144643 | 0.002201   | 1.92109877 |
| STAT3       | NM_213665.1 | STAT3       | 17 | Homo sapiens            | APRF; FLJ208    | 5.5791E-08 | 9.1498E-07 | 1.91971137 |
| SAMD3       | NM_00101737 | SAMD3       | 6  | Homo sapiens            | MGC35163; Fl    | 0.00017594 | 0.00037826 | 1.91887329 |
| IRX3        | NM_024336.1 | IRX3        | 16 | Homo sapiens            | IRX-1           | 6.6195E-06 | 2.7657E-05 | 1.91858171 |
| GNGT1       | NM_021955.3 | GNGT1       | 7  | Homo sapiens            | GNG1            | 0.00319098 | 0.00431131 | 1.91772966 |
| LOC389203   | XM_371691.4 | LOC389203   |    | PREDICTED: Homo sapiens | h               | 0.01207451 | 0.01344609 | 1.91653586 |
| LRRC20      | NM_207119.1 | LRRC20      | 10 | Homo sapiens            | FLJ10751; FLJ   | 1.9768E-08 | 4.872E-07  | 1.91413707 |
| CORIN       | NM_006587.2 | CORIN       | 4  | Homo sapiens            | Lrp4; Tmprss    | 6.0479E-06 | 2.5772E-05 | 1.90826454 |
| CYB561D1    | NM_182580.2 | CYB561D1    | 1  | Homo sapiens            | cytochrome b-   | 1.1498E-07 | 1.5125E-06 | 1.90484571 |
| AKAP8L      | NM_014371.2 | AKAP8L      | 19 | Homo sapiens            | HAP95; NAKA     | 8.308E-05  | 0.00020638 | 1.90227481 |
| C11orf74    | NM_138787.2 | C11ORF74    | 11 | Homo sapiens            | FLJ38678        | 1.0935E-08 | 3.3903E-07 | 1.90126183 |
| MYLIP       | NM_013262.3 | MYLIP       | 6  | Homo sapiens            | MIR             | 4.2411E-09 | 1.8331E-07 | 1.89963288 |
| LOC391692   | XM_373031.3 | LOC391692   | 4  | PREDICTED: Homo sapiens | s               | 0.00181055 | 0.00266272 | 1.89944468 |
|             | Hs.402146   | Hs.402146   | 1  | AGENCOURT_8911223       | NIH_I           | 0.04662533 | 0.04186784 | 1.89873568 |
| CLEC11A     | NM_002975.2 | CLEC11A     | 19 | Homo sapiens            | LSLCL; P47; S   | 2.7249E-06 | 1.4189E-05 | 1.89714727 |
| UPLP        | NM_00111440 | UPLP        |    | Homo sapiens            | uroplakin-like  | 1.3239E-08 | 3.7593E-07 | 1.89702398 |
| C1QTNF6     | NM_031910.3 | C1QTNF6     | 22 | Homo sapiens            | ZACRP6; CTRF    | 0.00721559 | 0.00868444 | 1.89640046 |
| C11orf67    | NM_024684.2 | C11ORF67    | 11 | Homo sapiens            | FLJ21035; MG    | 2.473E-08  | 5.6212E-07 | 1.89547456 |
| HIST1H2BM   | NM_003521.2 | HIST1H2BM   | 6  | Homo sapiens            | H2B1e; H2BFE    | 0.02755089 | 0.02704537 | 1.89424123 |
| LOC728979   | XR_038428.1 | LOC728979   |    | PREDICTED: Homo sapiens | n               | 0.02466813 | 0.02472732 | 1.89269714 |
| RFTN1       | NM_015150.1 | RFTN1       | 3  | Homo sapiens            | PIG9; RAFTLI    | 2.517E-05  | 7.8646E-05 | 1.88869257 |
| GFOD2       | NM_030819.2 | GFOD2       | 16 | Homo sapiens            | FLJ23802; MG    | 7.5189E-05 | 0.00018963 | 1.88808033 |
| GNB1L       | NM_053004.1 | GNB1L       | 22 | Homo sapiens            | GY2; DGCRK3     | 8.1953E-06 | 3.2463E-05 | 1.88807692 |
| PCDHGB6     | NM_018926.2 | PCDHGB6     | 5  | Homo sapiens            | PCDH-GAMMA      | 0.03112389 | 0.0298645  | 1.88793402 |
| SEC22B      | NM_004892.3 | SEC22B      | 1  | Homo sapiens            | SEC22L1; ERS    | 2.0525E-07 | 2.1908E-06 | 1.88663767 |
| SNX1        | NM_003099.3 | SNX1        | 15 | Homo sapiens            | SNX1A; Vps5;    | 0.00411618 | 0.00538312 | 1.88326027 |
| LOC441268   | NM_00101372 | LOC441268   | 7  | Homo sapiens            | hypothetical g  | 0.0068097  | 0.00826852 | 1.88267738 |
| LEPRE1      | NM_022356.2 | LEPRE1      | 1  | Homo sapiens            | P3H1; MGC11     | 1.305E-06  | 8.1496E-06 | 1.88266699 |
| VRK3        | NM_00102577 | VRK3        | 19 | Homo sapiens            | vaccinia relate | 9.932E-05  | 0.00023868 | 1.87877899 |
| SIPA1L2     | NM_020808.1 | SIPA1L2     | 1  | Homo sapiens            | SPAL2; FLJ23    | 4.378E-07  | 3.7258E-06 | 1.87864781 |
| TRIM21      | NM_003141.3 | TRIM21      | 11 | Homo sapiens            | RNF81; RO52;    | 0.00013948 | 0.00031292 | 1.8775353  |
| LOC10013399 | XM_00171678 | LOC10013399 |    | PREDICTED: Homo sapiens | h               | 0.00385905 | 0.00508551 | 1.87489071 |
| C1orf212    | NM_138428.2 | C1ORF212    | 1  | Homo sapiens            | FLJ90372; MG    | 0.00196454 | 0.00284954 | 1.87459007 |
| CLEC16A     | NM_015226.1 | CLEC16A     | 16 | Homo sapiens            | KIAA0350; Go    | 3.9444E-08 | 7.3949E-07 | 1.87442536 |
| RAB11FIP3   | NM_014700.2 | RAB11FIP3   | 16 | Homo sapiens            | KIAA0665; Ra    | 6.9811E-06 | 2.873E-05  | 1.87433763 |
| RNU1-5      | NR_004400.1 | RNU1-5      | 1  | Homo sapiens            | HSD4            | 6.0633E-10 | 7.2876E-08 | 1.87082265 |
| ERCC2       | NM_000400.2 | ERCC2       | 19 | Homo sapiens            | COFS2; EM9;     | 3.1466E-06 | 1.574E-05  | 1.86911126 |
| AMH         | NM_000479.2 | AMH         | 19 | Homo sapiens            | MIF; MIS        | 0.00680048 | 0.00826075 | 1.86906523 |
| GNG7        | NM_052847.1 | GNG7        | 19 | Homo sapiens            | FLJ00058        | 6.5864E-08 | 1.0283E-06 | 1.86848823 |
| TMEM185A    | NM_032508.1 | TMEM185A    |    | Homo sapiens            | FAM11A; MGC     | 4.2366E-05 | 0.00011948 | 1.86799893 |
| PIP5K1C     | NM_012398.1 | PIP5K1C     | 19 | Homo sapiens            | PIP5Kgamma;     | 5.4447E-07 | 4.3468E-06 | 1.86729942 |
| MAPT        | NM_016841.2 | MAPT        | 17 | Homo sapiens            | MTBT2; MAPTl    | 4.1255E-06 | 1.9419E-05 | 1.86558828 |
| NOXA1       | NM_006647.1 | NOXA1       | 9  | Homo sapiens            | MGC131800; I    | 1.9142E-06 | 1.0892E-05 | 1.86469544 |
| DST         | NM_020388.2 | DST         | 6  | Homo sapiens            | CATX-15; KIA    | 0.0020096  | 0.00290673 | 1.86384417 |
| LOC728229   | XM_943555.1 | LOC728229   | 22 | PREDICTED: Homo sapiens | h               | 0.00098308 | 0.00158355 | 1.86059185 |
| ZNF227      | NM_182490.1 | ZNF227      | 19 | Homo sapiens            | zinc finger pro | 0.02781096 | 0.02726102 | 1.85969651 |
| PTPN13      | NM_080684.1 | PTPN13      | 4  | Homo sapiens            | PTP1E; PNP1;    | 0.00550073 | 0.00689772 | 1.85823057 |
| LOC132241   | XM_379215.2 | LOC132241   | 3  | PREDICTED: Homo sapiens | h               | 0.00021511 | 0.00044536 | 1.85698249 |
| ABCG4       | NM_022169.3 | ABCG4       | 11 | Homo sapiens            | WHITE2          | 0.0002683  | 0.00053477 | 1.85644917 |
| TMEM189     | NM_199129.1 | TMEM189     | 20 | Homo sapiens            | UBE2V1; Kua     | 7.4349E-09 | 2.6198E-07 | 1.85636818 |
| TMEM50A     | NM_014313.2 | TMEM50A     | 1  | Homo sapiens            | SMP1; RP11-3    | 0.00039995 | 0.00074855 | 1.85571952 |
| PGGT1B      | NM_005023.2 | PGGT1B      | 5  | Homo sapiens            | BGGI; GGTI      | 0.02822398 | 0.02758267 | 1.85569477 |
| CBY1        | NM_015373.3 | CBY1        | 22 | Homo sapiens            | PGEA1; arb1;    | 3.9731E-06 | 1.8864E-05 | 1.85529675 |
| ST3GAL1     | NM_173344.1 | ST3GAL1     | 8  | Homo sapiens            | Gal-Nac6S; S    | 0.00387845 | 0.00510877 | 1.85518468 |
| SCARNA8     | NR_003009.1 | SCARNA8     | 9  | Homo sapiens            | U92             | 3.7491E-09 | 1.7685E-07 | 1.85511963 |
| PIK3C3      | NM_002647.2 | PIK3C3      | 18 | Homo sapiens            | MGC61518; V     | 6.166E-06  | 2.6123E-05 | 1.85411236 |

### 5.0 Upreg

|           |             |           |    |                         |                 |            |            |            |
|-----------|-------------|-----------|----|-------------------------|-----------------|------------|------------|------------|
| ZSCAN16   | NM_025231.1 | ZSCAN16   | 6  | Homo sapiens            | ZNF392; ZNF4    | 0.03196366 | 0.03055335 | 1.85382563 |
| PMS2L4    | NR_022007.1 | PMS2L4    | 7  | Homo sapiens            | postmeiotic se  | 1.46E-06   | 8.8711E-06 | 1.85249283 |
| SMAD2     | XM_930034.1 | SMAD2     | 18 | Homo sapiens            | hMAD-2; JV18    | 0.02638808 | 0.02612604 | 1.85015951 |
| TYSND1    | NM_173555.1 | TYSND1    | 10 | Homo sapiens            | FLJ40378; MG    | 1.0574E-05 | 3.9714E-05 | 1.84762305 |
| KIAA1602  | XM_035497.1 | KIAA1602  | 12 | Homo sapiens            | FP1193          | 0.00016363 | 0.0003567  | 1.84649982 |
| AMOT      | NM_133265.2 | AMOT      |    | Homo sapiens            | KIAA1071        | 0.00031279 | 0.00060838 | 1.84475136 |
| C10orf118 | NM_018017.2 | C10ORF118 | 10 | Homo sapiens            | MGC118918; I    | 0.00185236 | 0.00271193 | 1.84399161 |
| C11orf60  | NM_020153.2 | C11ORF60  | 11 | Homo sapiens            | C11orf2; FLJ2   | 0.03068064 | 0.02951666 | 1.84339846 |
| VPS16     | NM_080413.1 | VPS16     | 20 | Homo sapiens            | hVPS16          | 3.981E-07  | 3.4721E-06 | 1.84326547 |
| ING5      | XM_941026.1 | ING5      |    | PREDICTED: Homo sapiens | ir              | 0.00184905 | 0.00270799 | 1.84255119 |
| HLA-DMA   | NM_006120.2 | HLA-DMA   | 6  | Homo sapiens            | HLADM; RING     | 7.0309E-07 | 5.184E-06  | 1.84159315 |
| MPPE1     | NM_023075.3 | MPPE1     | 18 | Homo sapiens            | metallophosph   | 1.742E-05  | 5.9197E-05 | 1.83916146 |
| C16orf93  | NM_00101497 | C16ORF93  | 16 | Homo sapiens            | MGC104706       | 1.5556E-06 | 9.3359E-06 | 1.83841738 |
| WDR44     | NM_019045.3 | WDR44     |    | Homo sapiens            | DKFZp686L20     | 0.00035259 | 0.00067252 | 1.83743875 |
| PDPK1     | NM_002613.3 | PDPK1     | 16 | Homo sapiens            | MGC20087; M     | 0.00035417 | 0.00067524 | 1.83383305 |
| SLC25A42  | NM_178526.1 | SLC25A42  | 19 | Homo sapiens            | MGC26694        | 8.3757E-06 | 3.2969E-05 | 1.83383056 |
| POLR2L    | NM_021128.3 | POLR2L    | 11 | Homo sapiens            | hsRPB10b; RP    | 8.3458E-07 | 5.8581E-06 | 1.83296339 |
| GRPR      | NM_005314.2 | GRPR      |    | Homo sapiens            | gastrin-releasi | 0.00315506 | 0.00426935 | 1.83280042 |
| RHBDL3    | NM_138328.2 | RHBDL3    | 17 | Homo sapiens            | RHBDL4; FLJ4    | 2.6019E-06 | 1.3695E-05 | 1.83187026 |
| HSPA12A   | XM_945467.1 | HSPA12A   |    | PREDICTED: Homo sapiens | h               | 4.866E-06  | 2.1985E-05 | 1.82952226 |
| TSPAN33   | NM_178562.2 | TSPAN33   | 7  | Homo sapiens            | MGC50844; P     | 1.8219E-05 | 6.1317E-05 | 1.82912491 |
| CDKN1C    | NM_000076.1 | CDKN1C    | 11 | Homo sapiens            | BWCR; p57; B    | 0.00051743 | 0.00092594 | 1.82845034 |
| PEX6      | NM_000287.2 | PEX6      | 6  | Homo sapiens            | PAF-2; PAF2; I  | 4.7997E-06 | 2.1752E-05 | 1.82775548 |
| FYCO1     | NM_024513.1 | FYCO1     | 3  | Homo sapiens            | FLJ13335; RU    | 6.6369E-08 | 1.0307E-06 | 1.82374029 |
| SRPK2     | NM_182692.1 | SRPK2     | 7  | Homo sapiens            | FLJ36101; SF    | 0.04808423 | 0.04298432 | 1.82032075 |
| NKX3-1    | NM_006167.2 | NKX3-1    | 8  | Homo sapiens            | NKX3A; BAPX     | 2.1617E-07 | 2.2851E-06 | 1.81988065 |
| LONP2     | NM_031490.2 | LONP2     | 16 | Homo sapiens            | LONP; MGC48     | 9.3252E-05 | 0.00022683 | 1.81919192 |
| COL7A1    | NM_000094.2 | COL7A1    | 3  | Homo sapiens            | EBR1; EBD1; I   | 2.2732E-05 | 7.2845E-05 | 1.81821077 |
| ADAT1     | NM_012091.2 | ADAT1     | 16 | Homo sapiens            | HADAT1          | 0.0004253  | 0.00078742 | 1.81784947 |
| KIAA1468  | NM_020854.2 | KIAA1468  | 18 | Homo sapiens            | HsT885; HsT3    | 1.6715E-05 | 5.7378E-05 | 1.81564295 |
| WWTR1     | NM_015472.3 | WWTR1     | 3  | Homo sapiens            | TAZ; DKFZP58    | 0.00915444 | 0.01066256 | 1.81358029 |
| NBPF14    | NM_015383.1 | NBPF14    | 1  | Homo sapiens            | RP3-328E19.1    | 0.00084721 | 0.00139594 | 1.81341729 |
| CITED2    | NM_006079.3 | CITED2    | 6  | Homo sapiens            | P35SRJ; MRGJ    | 4.6712E-09 | 1.9333E-07 | 1.81330859 |
| IRS2      | NM_003749.2 | IRS2      | 13 | Homo sapiens            | insulin receptc | 3.2097E-05 | 9.5237E-05 | 1.81051938 |
|           |             |           | 14 | Homo sapiens            | cDNA FLJ4230    | 3.0039E-06 | 1.5208E-05 | 1.80686783 |
| RBBP5     | NM_005057.2 | RBBP5     | 1  | Homo sapiens            | RBQ3; SWD1      | 0.00011547 | 0.00026867 | 1.80503794 |
| PINX1     | NM_017884.3 | PINX1     | 8  | Homo sapiens            | LPTS; MGC88     | 0.00043493 | 0.00080187 | 1.80430455 |
| RABL4     | NM_006860.2 | RABL4     | 22 | Homo sapiens            | RAYL            | 3.2282E-06 | 1.603E-05  | 1.80016085 |
| ZNF473    | NM_015428.1 | ZNF473    | 19 | Homo sapiens            | HZFP100; ZNF    | 0.00030841 | 0.0006016  | 1.79877026 |
| SPTY2D1   | NM_194285.2 | SPTY2D1   | 11 | Homo sapiens            | DKFZp686I06     | 0.00357122 | 0.00474899 | 1.79813009 |
| C2orf56   | NM_144736.3 | C2ORF56   | 2  | Homo sapiens            | PRO1853         | 1.113E-07  | 1.5E-06    | 1.79573934 |
| TRAK1     | NM_014965.2 | TRAK1     | 3  | Homo sapiens            | OIP106          | 0.00432905 | 0.0056014  | 1.79534371 |
| NPEPL1    | NM_024663.3 | NPEPL1    | 20 | Homo sapiens            | FLJ42065; FLJ   | 1.4988E-06 | 9.0503E-06 | 1.79291626 |
|           |             |           | 10 | AGENCOURT_6795541       | NIH_I           | 0.05688184 | 0.04942378 | 1.79272109 |
| TMEM120A  | NM_031925.1 | TMEM120A  | 7  | Homo sapiens            | TMPTI           | 5.6872E-07 | 4.4793E-06 | 1.7917124  |
| GLB1L2    | NM_138342.2 | GLB1L2    | 11 | Homo sapiens            | MST114; MSTI    | 4.5058E-06 | 2.0731E-05 | 1.79143892 |
| DKK1      | NM_012242.2 | DKK1      | 10 | Homo sapiens            | DKK-1; SK       | 7.8505E-10 | 8.5037E-08 | 1.79086108 |
| RNF216L   | NR_023385.1 | RNF216L   | 7  | Homo sapiens            | ring finger pro | 0.00019331 | 0.00040959 | 1.7902738  |
| SNORA7B   | XM_930024.1 | SNORA7B   | 3  | Homo sapiens            | ACA7B           | 0.00145475 | 0.00221174 | 1.79011846 |
| SKAP2     | NM_003930.3 | SKAP2     | 7  | Homo sapiens            | RA70; SCAP2;    | 1.3403E-06 | 8.3227E-06 | 1.79010627 |
| LOC643035 | XM_931999.1 | LOC643035 | 1  | PREDICTED: Homo sapiens | s               | 5.3149E-05 | 0.0001434  | 1.78819149 |
| RBM43     | NM_198557.2 | RBM43     | 2  | Homo sapiens            | RNA binding r   | 0.01683064 | 0.01781758 | 1.7875158  |
| CNFN      | NM_032488.2 | CNFN      | 19 | Homo sapiens            | PLAC8L2         | 4.3732E-06 | 2.0302E-05 | 1.78674912 |
| LOC729495 | XR_015564.1 | LOC729495 | 22 | PREDICTED: Homo sapiens | s               | 1.3881E-06 | 8.5648E-06 | 1.78399233 |
| ARRDC3    | NM_020801.1 | ARRDC3    | 5  | Homo sapiens            | TLIMP; KIAA1    | 0.01576415 | 0.01682251 | 1.78375358 |
| LRRC6     | NM_012472.3 | LRRC6     | 8  | Homo sapiens            | L RTP; TSLRP    | 0.00110437 | 0.00174999 | 1.78307246 |
| PSMA2     | NM_002787.3 | PSMA2     | 7  | Homo sapiens            | HC3; MU; PSC    | 1.7315E-07 | 1.7075E-06 | 1.78236449 |
| ACSL1     | NM_001995.2 | ACSL1     | 4  | Homo sapiens            | FACL2; LACS;    | 3.5598E-05 | 0.00010415 | 1.78152158 |
| LOC401677 | XM_497272.2 | LOC401677 |    | PREDICTED: Homo sapiens | s               | 0.03967443 | 0.03659239 | 1.7794714  |
| BAMBI     | NM_012342.2 | BAMBI     | 10 | Homo sapiens            | NMA             | 8.78E-10   | 8.5595E-08 | 1.77927977 |
| CD163L1   | NM_174941.4 | CD163L1   | 12 | Homo sapiens            | M160; CD163I    | 3.9534E-06 | 1.878E-05  | 1.77794899 |
| WIPI1     | NM_017983.3 | WIPI1     |    | Homo sapiens            | WIPI49; FLJ1    | 1.3485E-06 | 8.3555E-06 | 1.77702505 |
| CENPT     | NM_025082.3 | CENPT     | 16 | Homo sapiens            | FLJ13111; CEI   | 3.688E-06  | 1.777E-05  | 1.77700872 |
| CBR4      | NM_032783.3 | CBR4      | 4  | Homo sapiens            | FLJ14431        | 5.5128E-06 | 2.3981E-05 | 1.77642579 |
| FAM54B    | NM_019557.5 | FAM54B    | 1  | Homo sapiens            | HYST1888; M     | 0.00156071 | 0.0023428  | 1.77565382 |
| SEC22A    | NM_012430.2 | SEC22A    | 3  | Homo sapiens            | SEC22L2         | 1.1403E-06 | 7.3786E-06 | 1.77355929 |
| APBB3     | NM_006051.2 | APBB3     | 5  | Homo sapiens            | MGC87674; SI    | 2.6146E-09 | 1.4338E-07 | 1.77308337 |
| ALAS1     | NM_000688.4 | ALAS1     | 3  | Homo sapiens            | MIG4; ALAS3;    | 0.00585141 | 0.00727509 | 1.77295741 |
| DIP2A     | NM_206889.1 | DIP2A     | 21 | Homo sapiens            | DIP2; C21orf1   | 0.00032009 | 0.00062052 | 1.77257362 |
| PTPRU     | NM_005704.3 | PTPRU     | 1  | Homo sapiens            | GLEPP1; hPTP    | 8.721E-05  | 0.00021476 | 1.77092028 |

## 5.0 Upreg

|             |             |              |    |                         |                  |            |            |            |
|-------------|-------------|--------------|----|-------------------------|------------------|------------|------------|------------|
| DNM2        | NM_004945.2 | DNM2         | 19 | Homo sapiens            | CMTDI1; CMTI     | 1.3552E-05 | 4.8336E-05 | 1.77084057 |
| GAA         | NM_000152.2 | GAA          | 17 | Homo sapiens            | LYAG             | 1.8828E-05 | 6.3003E-05 | 1.77061504 |
| LOC646786   | XM_929738.1 | LOC646786    | 6  | PREDICTED: Homo sapiens | s                | 0.00019734 | 0.00041521 | 1.76952311 |
| TLE6        | NM_024760.1 | TLE6         | 19 | Homo sapiens            | FLJ14009; MG     | 0.00047684 | 0.00086585 | 1.76947335 |
| C7orf20     | XM_946081.1 | C7ORF20      |    | PREDICTED: Homo sapiens | c                | 0.00429521 | 0.00556583 | 1.76874342 |
| FBXO4       | NM_012176.2 | FBXO4        | 5  | Homo sapiens            | FLJ10141; DK     | 0.04288404 | 0.0390316  | 1.76836537 |
| MAP1LC3B    | NM_022818.3 | MAP1LC3B     | 16 | Homo sapiens            | MAP1A/1BLC3      | 1.6636E-09 | 1.1584E-07 | 1.7671998  |
| AK1         | NM_000476.1 | AK1          | 9  | Homo sapiens            | adenylate kinase | 3.2025E-06 | 1.5947E-05 | 1.76539663 |
| CDK5        | NM_004935.2 | CDK5         | 7  | Homo sapiens            | PSSALRE          | 5.54E-08   | 9.1026E-07 | 1.76212432 |
| MT2A        | NM_005953.2 | MT2A         | 16 | Homo sapiens            | MT2              | 8.1619E-08 | 1.1856E-06 | 1.7616702  |
| CSAG3B      | NM_00108084 | CSAG3B       |    | Homo sapiens            | CSAG2            | 6.3147E-05 | 0.00016411 | 1.76140568 |
| RFX6        | NM_173560.1 | RFX6         | 6  | Homo sapiens            | dJ955L16.1; M    | 0.05733242 | 0.04972664 | 1.76047476 |
| RCOR2       | NM_173587.2 | RCOR2        | 11 | Homo sapiens            | REST corepres    | 8.7452E-05 | 0.00021529 | 1.75894538 |
| NRBF2       | NM_030759.3 | NRBF2        | 10 | Homo sapiens            | COPR2; COPR      | 2.9596E-05 | 8.9113E-05 | 1.75768456 |
| SNRK        | NM_017719.3 | SNRK         | 3  | Homo sapiens            | HSNFRK; DKF      | 4.512E-07  | 3.8066E-06 | 1.75766561 |
| FAM190B     | NM_018999.2 | FAM190B      | 10 | Homo sapiens            | FLJ14262; Gc     | 1.0433E-05 | 3.9304E-05 | 1.75660401 |
| C3orf39     | NM_032806.4 | C3ORF39      | 3  | Homo sapiens            | AGO61; FLJ14     | 2.2516E-06 | 1.224E-05  | 1.7539765  |
| PLSCR4      | NM_020353.1 | PLSCR4       | 3  | Homo sapiens            | phospholipid s   | 7.6761E-05 | 0.00019303 | 1.75350983 |
| RABAC1      | NM_006423.1 | RABAC1       | 19 | Homo sapiens            | PRAF1; PRA1;     | 2.5924E-06 | 1.3669E-05 | 1.75350636 |
| CHD2        | NM_001271.1 | CHD2         | 15 | Homo sapiens            | DKFZp781D17      | 0.01171971 | 0.01312429 | 1.75336855 |
| KDM5B       | NM_006618.3 | KDM5B        | 1  | Homo sapiens            | FLJ23670; FLJ    | 1.0092E-06 | 6.7644E-06 | 1.75207346 |
| CBLB        | NM_170662.3 | CBLB         | 3  | Homo sapiens            | DKFZp779F14      | 0.00031194 | 0.00060701 | 1.75172749 |
| WFS1        | NM_006005.2 | WFS1         | 4  | Homo sapiens            | DFNA14; DID      | 2.5068E-09 | 1.447E-07  | 1.75139191 |
| ARL3        | NM_004311.2 | ARL3         | 10 | Homo sapiens            | ARFL3            | 1.5586E-05 | 5.418E-05  | 1.75089516 |
| PLEKHB2     | NM_017958.1 | PLEKHB2      | 2  | Homo sapiens            | EVT2; FLJ207     | 6.9881E-06 | 2.8745E-05 | 1.74973288 |
| NAGK        | NM_017567.2 | NAGK         | 2  | Homo sapiens            | GNK; HSA242'     | 3.6059E-08 | 6.9687E-07 | 1.74770444 |
| IFI6        | NM_002038.2 | IFI6         | 1  | Homo sapiens            | IFI-6-16; 6-16   | 6.2761E-09 | 2.3634E-07 | 1.74622456 |
| PHTF1       | NM_006608.1 | PHTF1        | 1  | Homo sapiens            | PHTF             | 7.3311E-06 | 2.9724E-05 | 1.74521198 |
| LOC10013151 | XM_00172289 | LOC100131512 |    | PREDICTED: Homo sapiens | h                | 0.01578152 | 0.01683695 | 1.7449691  |
| LOC10012974 | XM_00171556 | LOC100129744 |    | PREDICTED: Homo sapiens | h                | 0.02355884 | 0.02374558 | 1.74485975 |
| RAPGEF2     | NM_014247.2 | RAPGEF2      | 4  | Homo sapiens            | RA-GEF; PDZC     | 8.1518E-07 | 5.7821E-06 | 1.74270781 |
| TPMT        | NM_000367.2 | TPMT         | 6  | Homo sapiens            | thiopurine S-n   | 1.0363E-06 | 6.8781E-06 | 1.73840204 |
| LQK1        | XR_041452.1 | LQK1         | 1  | PREDICTED: Homo sapiens | n                | 6.8583E-05 | 0.00017585 | 1.73771054 |
| GCA         | NM_012198.2 | GCA          | 2  | Homo sapiens            | GCL              | 1.5734E-07 | 1.8631E-06 | 1.73519756 |
| TUBG2       | NM_016437.1 | TUBG2        | 17 | Homo sapiens            | MGC131994        | 1.3187E-06 | 8.2116E-06 | 1.73500735 |
| ATG2A       | NM_015104.1 | ATG2A        | 11 | Homo sapiens            | MGC117153; I     | 2.2314E-05 | 7.1741E-05 | 1.73309636 |
| PRRG1       | NM_000950.1 | PRRG1        |    | Homo sapiens            | PRGP1            | 3.271E-05  | 9.673E-05  | 1.73266648 |
| SDCCAG8     | NM_006642.1 | SDCCAG8      | 1  | Homo sapiens            | HSPC085; NY-     | 0.02764374 | 0.02711832 | 1.73215778 |
| CGNL1       | NM_032866.3 | CGNL1        | 15 | Homo sapiens            | MGC138254; .     | 7.2869E-06 | 2.9559E-05 | 1.73157396 |
| HDLBP       | NM_005336.2 | HDLBP        | 2  | Homo sapiens            | HBP; VGL; FLJ    | 0.00834906 | 0.0098487  | 1.73148745 |
| ZBTB46      | NM_025224.2 | ZBTB46       | 20 | Homo sapiens            | BTBD4; ZNF34     | 2.211E-05  | 7.1165E-05 | 1.7308049  |
| DHDH        | NM_014475.2 | DHDH         | 19 | Homo sapiens            | HUM2DD           | 1.1307E-05 | 4.1929E-05 | 1.72958986 |
| TXNDC3      | NM_016616.2 | TXNDC3       | 7  | Homo sapiens            | SPTRX2; CILD     | 0.02305193 | 0.02330963 | 1.72908223 |
| TRAPPC9     | NM_031466.3 | TRAPPC9      | 8  | Homo sapiens            | IBP; KIAA188;    | 5.1935E-05 | 0.0001409  | 1.72863442 |
| TGOLN2      | NM_006464.2 | TGOLN2       | 2  | Homo sapiens            | TGN51; MGC1      | 7.4038E-07 | 5.3687E-06 | 1.7247806  |
| ARFIP1      | NM_00102559 | ARFIP1       | 4  | Homo sapiens            | MGC117369; I     | 3.3281E-05 | 9.812E-05  | 1.72443595 |
| ATE1        | NM_007041.2 | ATE1         | 10 | Homo sapiens            | MGC26724         | 0.00102632 | 0.00164383 | 1.72252589 |
| TP53INP1    | NM_033285.2 | TP53INP1     | 8  | Homo sapiens            | TP53INP1A; T     | 3.4217E-07 | 3.1338E-06 | 1.72186288 |
| GPS2        | NM_004489.4 | GPS2         | 17 | Homo sapiens            | MGC104294; I     | 1.2399E-07 | 1.5882E-06 | 1.71952421 |
| TNFAIP1     | NM_021137.3 | TNFAIP1      | 17 | Homo sapiens            | EDP1; B61; B;    | 3.037E-07  | 2.909E-06  | 1.71826797 |
| C7orf70     | XM_935791.1 | C7ORF70      | 7  | Homo sapiens            | chromosome 7     | 2.339E-07  | 2.3975E-06 | 1.71656259 |
| STX12       | NM_177424.1 | STX12        | 1  | Homo sapiens            | STX14; MGC5      | 1.0367E-05 | 3.9155E-05 | 1.71602211 |
| DDIT4L      | NM_145244.2 | DDIT4L       | 4  | Homo sapiens            | Rtp801L; RED     | 8.0105E-08 | 1.1734E-06 | 1.71546872 |
| BCL6        | NM_001706.2 | BCL6         | 3  | Homo sapiens            | ZBTB27; ZNF5     | 8.0707E-06 | 3.2143E-05 | 1.71428847 |
| FAM108A2    | XM_00172466 | FAM108A2     |    | PREDICTED: Homo sapiens | f                | 4.7485E-06 | 2.1542E-05 | 1.71321465 |
| AP1B1       | NM_145730.1 | AP1B1        | 22 | Homo sapiens            | CLAPB2; ADTE     | 4.7697E-07 | 3.9444E-06 | 1.71319569 |
| ARFGAP1     | NM_175609.1 | ARFGAP1      | 20 | Homo sapiens            | ARF1GAP; HRI     | 1.0552E-05 | 3.9651E-05 | 1.71300012 |
| LOC220686   | NM_199283.4 | LOC220686    | 22 | Homo sapiens            | hypothetical p   | 6.8653E-05 | 0.00017597 | 1.71282516 |
| GLCE        | NM_015554.1 | GLCE         | 15 | Homo sapiens            | KIAA0836; HS     | 2.0892E-08 | 5.036E-07  | 1.71131661 |
| KISS1R      | NM_032551.3 | KISS1R       | 19 | Homo sapiens            | HOT7T175; A)     | 0.00102832 | 0.00164614 | 1.70849566 |
| CXADR       | NM_001338.3 | CXADR        | 21 | Homo sapiens            | CAR; HCAR        | 4.6199E-08 | 8.0586E-07 | 1.70589748 |
| ZNF419      | NM_024691.2 | ZNF419       | 19 | Homo sapiens            | ZNF419A; FLJ     | 0.00031939 | 0.00061931 | 1.70493372 |
| F8A1        | NM_012151.3 | F8A1         |    | Homo sapiens            | DXS522E; HAI     | 0.02580218 | 0.02560954 | 1.70146198 |
| SUV420H1    | NM_016028.4 | SUV420H1     | 11 | Homo sapiens            | MGC21161; M      | 0.00085807 | 0.00141171 | 1.70099274 |
| TMEM188     | NM_153261.3 | TMEM188      | 16 | Homo sapiens            | C16orf69; FLJ    | 2.493E-06  | 1.3241E-05 | 1.70021496 |
| LASS4       | NM_024552.1 | LASS4        | 19 | Homo sapiens            | FLJ12089; Trh    | 0.01921245 | 0.01991376 | 1.69973678 |
| POLG2       | NM_007215.2 | POLG2        | 17 | Homo sapiens            | POLB; MTPOL      | 6.1046E-06 | 2.595E-05  | 1.69920128 |
| RAB4B       | NM_016154.2 | RAB4B        |    | Homo sapiens            | MGC52123         | 0.02370701 | 0.02387025 | 1.69845971 |
| LOC10012920 | XM_00171891 | LOC100129203 |    | PREDICTED: Homo sapiens | s                | 0.04226526 | 0.03857243 | 1.6978906  |
|             | Hs.19339    | HS.19339     | 3  | Homo sapiens            | cDNA clone IM    | 4.3717E-07 | 3.724E-06  | 1.69619148 |

## 5.0 Upreg

|             |                         |   |                                |            |            |            |
|-------------|-------------------------|---|--------------------------------|------------|------------|------------|
| MTMR14      | NM_022485.2 MTMR14      |   | 3 Homo sapiens FLJ22405; C3    | 1.789E-07  | 2.0099E-06 | 1.69538031 |
| TMEM205     | NM_198536.1 TMEM205     |   | 19 Homo sapiens UNQ501; MGC    | 3.9587E-10 | 5.887E-08  | 1.69428702 |
| CXorf40B    | NM_00101384CXORF40B     | X | Homo sapiens chromosome 3      | 5.1813E-06 | 2.2937E-05 | 1.6942061  |
| EPHA10      | NM_00109943EPHA10       |   | 1 Homo sapiens MGC43817; FL    | 0.02174129 | 0.02213484 | 1.69405552 |
| HCCA2       | NM_053005.2 HCCA2       |   | 11 Homo sapiens MOB2           | 2.4774E-05 | 7.7714E-05 | 1.69268505 |
| LMBRD1      | NM_018368.2 LMBRD1      |   | 6 Homo sapiens bA810I22.1; F   | 1.8379E-08 | 4.6607E-07 | 1.69127167 |
| DNAH1       | NM_015512.3 DNAH1       |   | 3 Homo sapiens HDHC7; HL11     | 0.05254217 | 0.04616976 | 1.69074983 |
| ACAD8       | NM_014384.1 ACAD8       |   | 11 Homo sapiens ACAD-8         | 1.339E-06  | 8.3206E-06 | 1.68982305 |
| STRBP       | NM_018387.2 STRBP       |   | 9 Homo sapiens DKFZp434N21     | 7.8851E-05 | 0.00019722 | 1.68838554 |
| C12orf4     | NM_020374.2 C12ORF4     |   | 12 Homo sapiens FLJ23899; FLJ  | 0.02958367 | 0.02867828 | 1.68509022 |
| MORN2       | NM_194270.1 MORN2       |   | 2 Homo sapiens MGC126131; I    | 8.307E-06  | 3.2743E-05 | 1.68406709 |
| LOC730820   | NM_030759.1 LOC730820   |   | PREDICTED: Homo sapiens s      | 9.8448E-07 | 6.6496E-06 | 1.68216913 |
| GALNT3      | NM_004482.2 GALNT3      |   | 2 Homo sapiens DKFZp686C10     | 0.04282808 | 0.03898875 | 1.68180376 |
| MOSPD1      | NM_019556.1 MOSPD1      | X | Homo sapiens DJ473B4           | 1.6577E-05 | 5.7016E-05 | 1.68150457 |
| LGMN        | NM_005606.5 LGMN        |   | 14 Homo sapiens AEP; LGMN1;    | 5.8351E-08 | 9.4634E-07 | 1.68138011 |
| KLRAQ1      | NM_00113562KLRAQ1       |   | 2 Homo sapiens KLRAQ motif c   | 0.00061236 | 0.00106394 | 1.68082341 |
| BCOR        | NM_017745.4 BCOR        | X | Homo sapiens MGC131961; I      | 2.8743E-06 | 1.474E-05  | 1.68066402 |
| SERINC3     | NM_198941.1 SERINC3     |   | 20 Homo sapiens TMS-1; TDE; S  | 1.4563E-05 | 5.1397E-05 | 1.68061869 |
| CLYBL       | NM_138280.3 CLYBL       |   | 13 Homo sapiens bA1340I5.1; I  | 2.5148E-07 | 2.5275E-06 | 1.68016759 |
| PVRL2       | NM_00104272PVRL2        |   | 19 Homo sapiens PVRR2; HVEB;   | 3.5319E-06 | 1.7235E-05 | 1.67983112 |
| LOC651991   | XM_945086.1 LOC651991   |   | PREDICTED: Homo sapiens h      | 0.03764863 | 0.03504446 | 1.67953358 |
| GRAMD4      | NM_015124.2 GRAMD4      |   | 22 Homo sapiens KIAA0767; MC   | 0.00069814 | 0.00118528 | 1.67947904 |
| LOC644988   | XR_017586.2 LOC644988   |   | 17 PREDICTED: Homo sapiens n   | 7.3024E-07 | 5.3215E-06 | 1.67784074 |
| LOC143666   | NM_002020.1 LOC143666   |   | 11 PREDICTED: Homo sapiens h   | 8.0711E-06 | 3.2131E-05 | 1.67704817 |
| TMEM208     | NM_014187.3 TMEM208     |   | 16 Homo sapiens HSPC171        | 5.275E-06  | 2.3223E-05 | 1.67356018 |
| LOC730060   | XM_00112617LOC730060    |   | PREDICTED: Homo sapiens h      | 0.01698261 | 0.01795679 | 1.67273516 |
| NME7        | NM_013330.3 NME7        |   | 1 Homo sapiens nm23-H7; FLJ    | 1.9335E-07 | 2.1074E-06 | 1.6719244  |
| IFT52       | NM_016004.2 IFT52       |   | 20 Homo sapiens NGD5; CGI-53   | 0.00017964 | 0.00038424 | 1.67180685 |
| BTBD10      | NM_032320.4 BTBD10      |   | 11 Homo sapiens MGC13007; G    | 1.7342E-07 | 1.9685E-06 | 1.67165079 |
| LCAP        | XM_927025.1 LCAP        | X | Homo sapiens lung carcinom.    | 0.01144291 | 0.01286356 | 1.67145399 |
| SAMD4B      | NM_018028.2 SAMD4B      |   | 19 Homo sapiens FLJ10211; SM   | 0.00036373 | 0.00069018 | 1.6714011  |
| OXSM        | NM_017897.1 OXSM        |   | 3 Homo sapiens FLJ20604; FA    | 1.9815E-06 | 1.1159E-05 | 1.67134257 |
| GBF1        | NM_004193.1 GBF1        |   | 10 Homo sapiens KIAA0248; MC   | 0.00022041 | 0.00045417 | 1.67114018 |
| CXorf57     | NM_018015.3 CXORF57     | X | Homo sapiens RP11-647M7.1      | 4.8798E-06 | 2.2024E-05 | 1.6678353  |
| CYTH3       | NM_004227.3 CYTH3       |   | 7 Homo sapiens GRP1; ARNO3     | 0.00068955 | 0.00117295 | 1.66765841 |
| TSPAN31     | NM_005981.3 TSPAN31     |   | 12 Homo sapiens SAS            | 0.00075842 | 0.00127309 | 1.66598476 |
| ZNF35       | NM_003420.2 ZNF35       |   | 3 Homo sapiens Zfp105; HF.10   | 0.00043849 | 0.00080623 | 1.66535985 |
|             | Hs.363526 HS.363526     |   | 8 Homo sapiens cDNA clone IM   | 1.3396E-07 | 1.6695E-06 | 1.66412686 |
| MORC2       | NM_014941.1 MORC2       |   | 22 Homo sapiens ZCW3; ZCWC     | 7.9861E-06 | 3.1835E-05 | 1.66183114 |
| CCDC128     | NM_152994.2 CCDC128     |   | 2 Homo sapiens MGC111781; I    | 3.728E-06  | 1.7913E-05 | 1.66181457 |
| ELOVL7      | NM_024930.1 ELOVL7      |   | 5 Homo sapiens FLJ23563        | 0.00517975 | 0.00654292 | 1.66149501 |
| SORT1       | NM_002959.4 SORT1       |   | 1 Homo sapiens NT3; Gp95       | 2.3877E-07 | 2.4388E-06 | 1.65914486 |
| CEP68       | NM_015147.1 CEP68       |   | 2 Homo sapiens FLJ25920; KIA   | 0.00545516 | 0.00684547 | 1.65766875 |
| THBS3       | NM_007112.3 THBS3       |   | 1 Homo sapiens MGC119564; T    | 0.02915862 | 0.02831943 | 1.65683062 |
| C2orf64     | NM_00100821C2ORF64      |   | 2 Homo sapiens G330578E17R     | 1.4376E-06 | 8.7779E-06 | 1.65564639 |
| LOC730389   | XM_00172641LOC730389    |   | 7 PREDICTED: Homo sapiens h    | 0.03172151 | 0.03036819 | 1.65520003 |
| PIGH        | NM_004569.2 PIGH        |   | 14 Homo sapiens GPI-H          | 2.3205E-06 | 1.2529E-05 | 1.65484391 |
| CCBL2       | NM_00100866CCBL2        |   | 1 Homo sapiens DKFZp547N11     | 0.0210741  | 0.02155813 | 1.65411757 |
| AZI1        | NM_014984.1 AZI1        |   | 17 Homo sapiens AZ1; Cep131    | 6.5957E-07 | 4.9675E-06 | 1.6535942  |
| FER         | NM_005246.1 FER         |   | 5 Homo sapiens TYK3            | 1.9344E-06 | 1.0971E-05 | 1.65218036 |
| LOC10013093 | XM_00172701LOC100130935 |   | PREDICTED: Homo sapiens s      | 0.04571918 | 0.0412229  | 1.65092293 |
| STIM2       | NM_020860.2 STIM2       |   | 4 Homo sapiens KIAA1482; FL    | 0.00041009 | 0.00076459 | 1.65067659 |
| IGSF3       | NM_001542.2 IGSF3       |   | 1 Homo sapiens V8; EWI-3; M    | 1.669E-08  | 4.3454E-07 | 1.65008264 |
| PBX3        | NM_006195.4 PBX3        |   | 9 Homo sapiens pre-B-cell leuk | 7.2406E-06 | 2.9439E-05 | 1.64990456 |
| PEX16       | NM_004813.1 PEX16       |   | 11 Homo sapiens peroxisomal b  | 2.3187E-05 | 7.3954E-05 | 1.64848162 |
| FAM176A     | NM_00113503FAM176A      |   | 2 Homo sapiens family with se  | 0.00101867 | 0.00163366 | 1.64830967 |
| EXT2        | NM_000401.2 EXT2        |   | 11 Homo sapiens SOTV           | 1.8092E-06 | 1.0437E-05 | 1.64805308 |
| BIK         | NM_001197.3 BIK         |   | 22 Homo sapiens NBK; BIP1; BF  | 4.2091E-07 | 3.6277E-06 | 1.64745539 |
| PRAF2       | NM_007213.1 PRAF2       | X | Homo sapiens JM4               | 1.6988E-06 | 9.9769E-06 | 1.64577359 |
| LOC653051   | XM_925795.1 LOC653051   |   | 17 PREDICTED: Homo sapiens s   | 0.05371356 | 0.04709531 | 1.64554096 |
| ANKDD1A     | NM_182703.2 ANKDD1A     |   | 15 Homo sapiens MGC120306; I   | 5.8723E-07 | 4.5637E-06 | 1.64540226 |
| KIAA0562    | NM_014704.2 KIAA0562    |   | 1 Homo sapiens RP1-286D6.4;    | 0.00446507 | 0.00575279 | 1.64520881 |
| TTPAL       | NM_024331.2 TTPAL       |   | 20 Homo sapiens DKFZp686E08    | 1.2165E-05 | 4.4565E-05 | 1.64445791 |
| SENP5       | NM_152699.4 SENP5       |   | 3 Homo sapiens MGC27076; D     | 1.4319E-06 | 8.7489E-06 | 1.64294109 |
| PARD3       | NM_019619.2 PARD3       |   | 10 Homo sapiens SE2-5T2; PAR   | 0.03014582 | 0.02913631 | 1.64256048 |
| SERINC1     | NM_020755.2 SERINC1     |   | 6 Homo sapiens TDE2; KIAA12    | 0.00040455 | 0.00075553 | 1.64195078 |
| LOC729101   | NM_144981.1 LOC729101   |   | 11 PREDICTED: Homo sapiens n   | 0.00014199 | 0.00031758 | 1.64122419 |
| MARK3       | NM_002376.4 MARK3       |   | 14 Homo sapiens CTAK1; KP78;   | 0.00020983 | 0.00043658 | 1.64090772 |
| GJB5        | NM_005268.2 GJB5        |   | 1 Homo sapiens CX31.1          | 0.00155761 | 0.00233975 | 1.6407928  |
| BET1        | NM_005868.3 BET1        |   | 7 Homo sapiens HBET1; DKFZ     | 0.00365844 | 0.00484955 | 1.63990626 |

5.0 Upreg

|           |                   |           |    |                             |            |            |            |
|-----------|-------------------|-----------|----|-----------------------------|------------|------------|------------|
| RIC8B     | NM_018157.1       | RIC8B     | 12 | Homo sapiens hSyn; FLJ106;  | 4.272E-05  | 0.00012006 | 1.63875336 |
| GBA2      | XM_944300.1       | GBA2      | 9  | Homo sapiens AD035; KIAA1   | 0.00496881 | 0.00631465 | 1.63855474 |
| ATP6V0D1  | NM_004691.3       | ATP6V0D1  | 16 | Homo sapiens VPATPD; ATP6   | 1.2779E-06 | 8.0142E-06 | 1.63766508 |
| GPAM      | NM_020918.2       | GPAM      | 10 | Homo sapiens GPAT1; MGC2    | 7.4563E-07 | 5.3978E-06 | 1.63676158 |
| SYN2      | NM_003178.3       | SYN2      | 3  | Homo sapiens SYNIIa; SYNII  | 0.0017454  | 0.00257987 | 1.63584665 |
| NUS1      | NM_138459.3       | NUS1      | 6  | Homo sapiens NgBR; C6orf6   | 0.04137103 | 0.03787057 | 1.63514088 |
| CD99L2    | NM_134445.2       | CD99L2    | X  | Homo sapiens CD99B; DKFZ    | 7.2673E-06 | 2.9506E-05 | 1.63495829 |
| MGC72104  | NM_207350.1       | MGC72104  | 20 | Homo sapiens similar to FRG | 3.0051E-06 | 1.5206E-05 | 1.63367463 |
| ACPL2     | NM_152282.2       | ACPL2     | 3  | Homo sapiens FLJ23751       | 2.576E-06  | 1.3616E-05 | 1.63233727 |
|           | Hs.107418         | HS.107418 | 5  | Homo sapiens cDNA FLJ4185   | 6.0842E-05 | 0.00015959 | 1.63160384 |
| FOXD2     | NM_004474.2       | FOXD2     | 1  | Homo sapiens FREAC-9; FKH   | 7.1052E-05 | 0.00018107 | 1.63082651 |
| STK11IP   | NM_052902.1       | STK11IP   | 2  | Homo sapiens STK11IP1; KI/  | 0.00179519 | 0.00264412 | 1.62900504 |
| RHOB      | NM_004040.2       | RHOB      | 2  | Homo sapiens ARH6; MST08    | 1.8125E-10 | 3.8788E-08 | 1.62888638 |
| ENPP4     | NM_014936.3       | ENPP4     | 6  | Homo sapiens KIAA0879; NP   | 0.00011528 | 0.00026829 | 1.62634285 |
| GDPD1     | NM_182569.1       | GDPD1     | 17 | Homo sapiens FLJ27503; UG   | 0.0019273  | 0.00280665 | 1.62626022 |
| MTE       | NM_175621.2       | MTE       |    | Homo sapiens MT1I           | 2.6885E-11 | 1.2415E-08 | 1.62510119 |
| C8orf47   | NM_173549.1       | C8ORF47   | 8  | Homo sapiens FLJ39553       | 0.00293021 | 0.00400213 | 1.62488449 |
| KBTBD11   | NM_014867.1       | KBTBD11   | 8  | Homo sapiens KIAA0711; KL   | 2.2266E-07 | 2.323E-06  | 1.62463314 |
| BTBD12    | NM_032444.2       | BTBD12    | 16 | Homo sapiens KIAA1987; KI/  | 0.00065213 | 0.00112017 | 1.62432657 |
| B4GALNT4  | NM_178537.3       | B4GALNT4  | 11 | Homo sapiens Beta4GalNAC-   | 0.0078479  | 0.00932775 | 1.62363448 |
| MST1      | NM_020998.2       | MST1      | 3  | Homo sapiens HGFL; NF15S2   | 2.2949E-06 | 1.2422E-05 | 1.62282008 |
| MGC39900  | XM_936687.1       | MGC39900  |    | PREDICTED: Homo sapiens h   | 2.6085E-05 | 8.0816E-05 | 1.6225144  |
| SELM      | NM_080430.2       | SELM      | 22 | Homo sapiens MGC40146; SI   | 1.0701E-06 | 7.0544E-06 | 1.62234266 |
| APITD1    | NM_198544.2       | APITD1    | 1  | Homo sapiens MGC32686; CI   | 2.2634E-05 | 7.261E-05  | 1.62228548 |
| ANKRD49   | NM_017704.2       | ANKRD49   | 11 | Homo sapiens FGIF; FLJ2018  | 0.00635426 | 0.0078008  | 1.6214496  |
| SLC9A1    | NM_003047.2       | SLC9A1    | 1  | Homo sapiens APNH; FLJ422   | 1.3131E-05 | 4.7217E-05 | 1.62089219 |
| LOC730993 | XR_038168.1       | LOC730993 |    | PREDICTED: Homo sapiens n   | 0.00510393 | 0.00646483 | 1.62051588 |
| GFI1      | NM_005263.2       | GFI1      | 1  | Homo sapiens ZNF163         | 0.00443354 | 0.00571469 | 1.61947818 |
| PLEKHG4   | NM_015432.2       | PLEKHG4   | 16 | Homo sapiens puratrophin1;  | 2.5121E-05 | 7.8521E-05 | 1.61768816 |
|           | Hs.572219         | HS.572219 |    | CM3-MT0357-260101-690-b:    | 6.3031E-06 | 2.6575E-05 | 1.61705152 |
| QSOX1     | NM_002826.4       | QSOX1     | 1  | Homo sapiens QSCN6; FLJ34   | 6.6257E-07 | 4.9644E-06 | 1.61669845 |
| C14orf82  | XM_944991.1       | C14ORF82  |    | PREDICTED: Homo sapiens c   | 0.01818757 | 0.01899961 | 1.61305458 |
| LOC653583 | XM_928224.1       | LOC653583 | 19 | PREDICTED: Homo sapiens s   | 0.03533339 | 0.03322422 | 1.61195438 |
| PDLIM3    | NM_014476.1       | PDLIM3    | 4  | Homo sapiens DKFZp686L03    | 5.242E-05  | 0.00014196 | 1.61166313 |
| SLC25A29  | NM_00103935       | SLC25A29  | 14 | Homo sapiens CACL; C14orf   | 0.00843353 | 0.00993232 | 1.61125507 |
| SMYD3     | NM_022743.1       | SMYD3     | 1  | Homo sapiens bA74P14.1; ZI  | 4.0034E-08 | 7.442E-07  | 1.61071227 |
| CRIPAK    | NM_175918.2       | CRIPAK    | 4  | Homo sapiens FLJ34443       | 2.0733E-05 | 6.7927E-05 | 1.60865013 |
| TMEM184B  | NM_012264.3       | TMEM184B  | 22 | Homo sapiens DKFZp686N11    | 2.0786E-06 | 1.1565E-05 | 1.60796779 |
| RHBDD1    | NM_032276.2       | RHBDD1    | 2  | Homo sapiens DKFZp547E05    | 0.00012786 | 0.00029206 | 1.60781301 |
| HOXB2     | NM_002145.2       | HOXB2     | 17 | Homo sapiens HOX2H; HOX2    | 0.04838235 | 0.04318042 | 1.60633378 |
| NELF      | NM_015537.3       | NELF      | 9  | Homo sapiens RP11-48C7.1;   | 3.1795E-08 | 6.4876E-07 | 1.60630183 |
| SLC31A1   | NM_001859.2       | SLC31A1   | 9  | Homo sapiens hCTR1; COPT1   | 0.00010848 | 0.00025586 | 1.60543594 |
| C3orf31   | NM_138807.2       | C3ORF31   | 3  | Homo sapiens MGC16471; D    | 2.737E-05  | 8.4083E-05 | 1.60288075 |
| ZSCAN21   | NM_145914.2       | ZSCAN21   | 7  | Homo sapiens NY-REN-21; D   | 0.0027579  | 0.00379693 | 1.60012004 |
| MXD4      | NM_006454.2       | MXD4      | 4  | Homo sapiens MSTP149; MAI   | 1.652E-07  | 1.9147E-06 | 1.59917585 |
| RIN3      | NM_024832.3       | RIN3      | 14 | Homo sapiens FLJ11700; FLJ  | 0.0412589  | 0.03777581 | 1.5991062  |
| FBXL20    | NM_032875.1       | FBXL20    | 17 | Homo sapiens Fbl2; MGC154   | 0.02410756 | 0.02422907 | 1.59780842 |
| RIMBP3C   | NM_00112863       | RIMBP3C   | 22 | Homo sapiens RIMS binding   | 0.03943035 | 0.03641321 | 1.59720915 |
| POLM      | NM_013284.1       | POLM      | 7  | Homo sapiens Tdt-N          | 0.01005054 | 0.01151972 | 1.59703706 |
| SGSM3     | NM_015705.4       | SGSM3     | 22 | Homo sapiens MAP; DKFZp7    | 0.00494076 | 0.00628356 | 1.59684479 |
| CSAG3A    | NM_203311.1       | CSAG3A    | X  | Homo sapiens MGC17065       | 3.75E-05   | 0.00010834 | 1.5964903  |
| UBTD2     | NM_152277.1       | UBTD2     | 5  | Homo sapiens MGC30022; D    | 0.03278231 | 0.03116273 | 1.59576506 |
| AFTPH     | NM_017657.3       | AFTPH     | 2  | Homo sapiens MGC33965; FI   | 2.4237E-05 | 7.6413E-05 | 1.59523006 |
| DENN5B    | NM_144973.2       | DENN5B    | 12 | Homo sapiens FLJ41648; DK   | 1.133E-05  | 4.1998E-05 | 1.59342737 |
| MTMR9     | NM_015458.3       | MTMR9     | 8  | Homo sapiens LIP-STYX; C8c  | 5.3728E-07 | 4.3051E-06 | 1.5921391  |
| NPHP3     | NM_153240.3       | NPHP3     | 3  | Homo sapiens FLJ30691; FLJ  | 0.00011688 | 0.00027116 | 1.59174619 |
| PRKCZ     | NM_00103358       | PRKCZ     | 1  | Homo sapiens PKC2           | 0.00016914 | 0.00036633 | 1.59093014 |
| SBF1      | NM_002972.1       | SBF1      | 22 | Homo sapiens DKFZp761D04    | 9.6076E-09 | 3.1691E-07 | 1.5907906  |
| HADHA     | NM_000182.3       | HADHA     | 2  | Homo sapiens LCHAD; MGC1    | 0.00128669 | 0.00199389 | 1.5905521  |
| LOC440731 | XM_933693.1       | LOC440731 | 1  | PREDICTED: Homo sapiens h   | 5.399E-07  | 4.3221E-06 | 1.58951367 |
| UTP14C    | NM_021645.4       | UTP14C    | 13 | Homo sapiens UTP14B; KIAA   | 2.7139E-06 | 1.4148E-05 | 1.58926894 |
| KIF3B     | NM_004798.2       | KIF3B     | 20 | Homo sapiens HH0048; KIAA   | 4.6031E-07 | 3.8501E-06 | 1.58676976 |
| FAM103A1  | NM_031452.2       | FAM103A1  | 15 | Homo sapiens HsT19360; C1   | 3.2227E-07 | 3.0112E-06 | 1.58286227 |
| AGGF1     | NM_018046.3       | AGGF1     | 5  | Homo sapiens VGSQ; FLJ102   | 4.4383E-05 | 0.00012386 | 1.58190847 |
| SKIV2L    | NM_006929.4       | SKIV2L    | 6  | Homo sapiens SKIV2; DDX1    | 1.4985E-05 | 5.2444E-05 | 1.58142017 |
| UBE2CBP   | NM_198920.1       | UBE2CBP   | 6  | Homo sapiens YJR141W; MG    | 0.01749885 | 0.01841167 | 1.58132127 |
| LRRC45    | NM_144999.2       | LRRC45    | 17 | Homo sapiens MGC20806       | 0.00028409 | 0.00056128 | 1.58097394 |
| IDH3G     | NM_004135.2       | IDH3G     | X  | Homo sapiens H-IDHG         | 1.6721E-06 | 9.8662E-06 | 1.57891514 |
| SCAND1    | NM_033630.1       | SCAND1    | 20 | Homo sapiens RAZ1; SDP1     | 5.2627E-07 | 4.2558E-06 | 1.5782445  |
|           | 39327 NM_019106.4 | 39327     | 22 | Homo sapiens SEP3; MGC13:   | 1.2E-06    | 7.6851E-06 | 1.57680196 |



## 5.0 Upreg

|             |                          |   |                                |            |            |            |
|-------------|--------------------------|---|--------------------------------|------------|------------|------------|
| RANBP10     | NM_020850.1 RANBP10      |   | 16 Homo sapiens KIAA1464; FLI  | 7.0528E-05 | 0.00017989 | 1.57672236 |
| LIPA        | NM_000235.2 LIPA         |   | 10 Homo sapiens CESD; LAL      | 2.2985E-09 | 1.3719E-07 | 1.5765898  |
| NPC1        | NM_000271.1 NPC1         |   | 18 Homo sapiens NPC            | 3.555E-08  | 6.9469E-07 | 1.57575751 |
| HLA-DRB3    | NM_022555.3 HLA-DRB3     |   | 6 Homo sapiens MGC117330; I    | 2.3722E-05 | 7.5275E-05 | 1.57566142 |
| CCDC53      | NM_016053.1 CCDC53       |   | 12 Homo sapiens CGI-116        | 1.1911E-05 | 4.3763E-05 | 1.57562727 |
| RAD9A       | NM_004584.2 RAD9A        |   | 11 Homo sapiens RAD9           | 0.00059156 | 0.00103538 | 1.57516231 |
| ELK4        | NM_001973.2 ELK4         |   | 1 Homo sapiens SAP1            | 0.01779031 | 0.01864901 | 1.57375818 |
| C4orf48     | NM_00114193 C4ORF48      |   | 4 Homo sapiens chromosome 4    | 3.8483E-05 | 0.00011041 | 1.57322753 |
| C17orf95    | NM_00108051 C17ORF95     |   | 17 Homo sapiens chromosome 1   | 3.0284E-06 | 1.5271E-05 | 1.5718798  |
| SLC7A11     | NM_014331.2 SLC7A11      |   | 4 Homo sapiens CCBR1; xCT      | 0.00150232 | 0.00227108 | 1.57156856 |
| DGCR2       | NM_005137.1 DGCR2        |   | 22 Homo sapiens SEZ-12; IDD;   | 1.1816E-06 | 7.5954E-06 | 1.57059507 |
| ATP5G3      | NM_00100225 ATP5G3       |   | 2 Homo sapiens MGC125738; I    | 0.00881467 | 0.0103175  | 1.5697854  |
| C2orf42     | NM_017880.1 C2ORF42      |   | 2 Homo sapiens FLJ20558        | 4.976E-05  | 0.00013614 | 1.56799394 |
| ZNF74       | NM_003426.1 ZNF74        |   | 22 Homo sapiens Zfp520; ZNF5   | 0.05008    | 0.04437058 | 1.56702307 |
| POR         | NM_000941.1 POR          |   | 7 Homo sapiens CPR; FLJ2646    | 6.9033E-07 | 5.1286E-06 | 1.56679893 |
| CCNO        | NM_021147.2 CCNO         |   | 5 Homo sapiens UDG2; UNG2;     | 6.8883E-09 | 2.477E-07  | 1.56675637 |
| BCORL1      | NM_021946.2 BCORL1       | X | Homo sapiens FLJ11362; B9      | 0.01269236 | 0.01401495 | 1.56643848 |
| GNPDA2      | NM_138335.1 GNPDA2       |   | 4 Homo sapiens SB52            | 0.00331567 | 0.00445645 | 1.56568117 |
| KLF9        | NM_001206.2 KLF9         |   | 9 Homo sapiens BTEB; BTEB1     | 1.2946E-05 | 4.6646E-05 | 1.56523193 |
| LOC645489   | XM_928514.1 LOC645489    |   | 8 PREDICTED: Homo sapiens h    | 0.00013158 | 0.00029831 | 1.56537292 |
| LOC653297   | XM_926730.1 LOC653297    | X | PREDICTED: Homo sapiens s      | 0.0001291  | 0.00029413 | 1.56309782 |
| KIAA0913    | NM_015037.1 KIAA0913     |   | 10 Homo sapiens FLJ34302       | 3.3785E-08 | 6.7217E-07 | 1.56302641 |
| C6orf85     | NM_021945.4 C6ORF85      |   | 6 Homo sapiens DKFZP434F01     | 1.9593E-06 | 1.1091E-05 | 1.56170291 |
| C14orf129   | NM_016472.3 C14ORF129    |   | 14 Homo sapiens HSPC210; GSI   | 5.3301E-07 | 4.2905E-06 | 1.56123764 |
| LOC10013357 | XM_00171453 LOC100133578 |   | PREDICTED: Homo sapiens s      | 0.00126956 | 0.00196943 | 1.56099193 |
| TMEM30A     | NM_018247.2 TMEM30A      |   | 6 Homo sapiens FLJ10856; C6    | 3.4462E-06 | 1.693E-05  | 1.5599497  |
| ANKFY1      | NM_020740.1 ANKFY1       |   | 17 Homo sapiens KIAA1255; DK   | 0.00010527 | 0.00025017 | 1.55838146 |
| HFE         | NM_000410.3 HFE          |   | 6 Homo sapiens MGC103790; I    | 0.00125477 | 0.00195235 | 1.55687938 |
| UBL3        | NM_007106.2 UBL3         |   | 13 Homo sapiens DKFZP434K15    | 5.8644E-05 | 0.00015456 | 1.55656833 |
| SNORD83B    | NR_000028.1 SNORD83B     |   | 22 Homo sapiens U83B; RNU83I   | 0.00030467 | 0.00059589 | 1.5559892  |
| MYEOV       | NM_138768.2 MYEOV        |   | 11 Homo sapiens OCIM           | 3.0643E-06 | 1.5416E-05 | 1.55565142 |
| PURB        | NM_033224.3 PURB         |   | 7 Homo sapiens MGC126786; I    | 4.5404E-07 | 3.8232E-06 | 1.55522497 |
| SLC25A4     | NM_001151.2 SLC25A4      |   | 4 Homo sapiens PGC1; ANT1; I   | 1.379E-09  | 1.1101E-07 | 1.5515851  |
| INTS5       | NM_030628.1 INTS5        |   | 11 Homo sapiens INT5; KIAA16   | 1.2609E-06 | 7.936E-06  | 1.55450521 |
| LOC10012966 | XM_00171360 LOC10012966  |   | 6 PREDICTED: Homo sapiens h    | 1.5655E-09 | 1.164E-07  | 1.55329799 |
| AADAACL1    | NM_020792.3 AADAACL1     |   | 3 Homo sapiens arylacetamide   | 1.6952E-06 | 9.9621E-06 | 1.55301595 |
| UFM1        | NM_016617.1 UFM1         |   | 13 Homo sapiens BA131P10.1; C  | 1.5539E-06 | 9.3318E-06 | 1.55189191 |
| TMEM56      | NM_152487.1 TMEM56       |   | 1 Homo sapiens MGC102912; I    | 0.05276953 | 0.04633706 | 1.55075049 |
| ID2         | NM_002166.4 ID2          |   | 2 Homo sapiens GIG8; MGC26     | 2.531E-09  | 1.4514E-07 | 1.54990993 |
|             | Hs.154336 HS.154336      |   | 9 Homo sapiens clone 24583 nr  | 0.00792244 | 0.00940743 | 1.54966598 |
| TM7SF2      | NM_003273.1 TM7SF2       |   | 11 Homo sapiens ANG1; DHCR1    | 2.4832E-08 | 5.63E-07   | 1.54825237 |
| CHIC2       | NM_012110.2 CHIC2        |   | 4 Homo sapiens BTL; MGC211     | 2.0434E-06 | 1.142E-05  | 1.54605059 |
| ZCCHC14     | NM_015144.1 ZCCHC14      |   | 16 Homo sapiens MGC126527; I   | 1.0767E-07 | 1.4578E-06 | 1.54599615 |
| ERMAP       | NM_00101792 ERMAP        |   | 1 Homo sapiens SC; MGC1188     | 0.05390073 | 0.04724998 | 1.54594526 |
| KIDINS220   | NM_020738.1 KIDINS220    |   | 2 Homo sapiens ARMS; MGC16     | 6.4604E-06 | 2.7121E-05 | 1.54584506 |
| ASAP3       | NM_017707.2 ASAP3        |   | 1 Homo sapiens CENTB6; ACA     | 6.2456E-07 | 4.7776E-06 | 1.5456573  |
| ZBTB48      | NM_005341.1 ZBTB48       |   | 1 Homo sapiens pp9964; HKR     | 3.6498E-06 | 1.7634E-05 | 1.54478823 |
| CELSR2      | NM_001408.1 CELSR2       |   | 1 Homo sapiens CDHF10; FLJ4    | 0.00068523 | 0.00116652 | 1.54447618 |
| CGRRF1      | NM_006568.2 CGRRF1       |   | 14 Homo sapiens RNF197; CGR    | 2.8296E-05 | 8.6235E-05 | 1.54330081 |
| OKL38       | NM_013370.2 OKL38        |   | 16 Homo sapiens BDGI           | 5.8679E-06 | 2.5139E-05 | 1.54260466 |
| SYNJ2BP     | NM_018373.1 SYNJ2BP      |   | 14 Homo sapiens Arip2; OMP25   | 6.0683E-08 | 9.7515E-07 | 1.54256683 |
| SLC35A5     | NM_017945.2 SLC35A5      |   | 3 Homo sapiens FLJ25973; DK    | 9.5968E-05 | 0.0002319  | 1.54157371 |
| SNORA80     | NR_002996.2 SNORA80      |   | 21 Homo sapiens ACA67          | 0.00846491 | 0.00996125 | 1.54114793 |
| PIGM        | NM_145167.1 PIGM         |   | 1 Homo sapiens MGC29896        | 3.482E-06  | 1.7049E-05 | 1.54018033 |
| MTMR6       | NM_004685.2 MTMR6        |   | 13 Homo sapiens myotubularin 1 | 0.00154838 | 0.00232828 | 1.53970907 |
| LOC151162   | NR_024275.1 LOC151162    |   | 2 Homo sapiens hypothetical L  | 1.4832E-09 | 1.1317E-07 | 1.53960442 |
|             | Hs.491292 HS.491292      |   | 8 Homo sapiens cDNA FLJ3655    | 0.00392758 | 0.00516728 | 1.53917135 |
| TSTA3       | NM_003313.2 TSTA3        |   | 8 Homo sapiens FX; P35B        | 4.731E-05  | 0.00013057 | 1.53883797 |
| POFUT2      | NM_015227.3 POFUT2       |   | 21 Homo sapiens C21orf80; FUT  | 9.4105E-07 | 6.4106E-06 | 1.53794211 |
| C15orf57    | NM_052849.2 C15ORF57     |   | 15 Homo sapiens MGC20481; FL   | 1.2846E-06 | 8.0392E-06 | 1.53724052 |
| PREB        | NM_013388.4 PREB         |   | 2 Homo sapiens SEC12; MGC3     | 3.4925E-07 | 3.1721E-06 | 1.53660142 |
|             | Hs.545615 HS.545615      |   | 9 od80c09.s1 NCI_CGAP_Ov2      | 0.00049422 | 0.00089223 | 1.5363197  |
| CBWD3       | NM_201453.2 CBWD3        |   | 9 Homo sapiens bA561O23.1      | 1.4615E-05 | 5.1539E-05 | 1.53619444 |
| RELL1       | NM_00108540 RELL1        |   | 4 Homo sapiens MGC50583; FL    | 7.2027E-05 | 0.00018307 | 1.53597547 |
| C6orf170    | NM_152730.4 C6ORF170     |   | 6 Homo sapiens bA301B7.2; FL   | 0.00013377 | 0.00030243 | 1.53591411 |
| MPV17       | NM_002437.3 MPV17        |   | 2 Homo sapiens SYM1            | 3.9508E-07 | 3.4492E-06 | 1.53489098 |
| DNAJC25     | NM_00101588 DNAJC25      |   | 9 Homo sapiens DnaJ (Hsp40)    | 0.00011622 | 0.00026998 | 1.53273176 |
| THYN1       | NM_014174.2 THYN1        |   | 11 Homo sapiens MY105; MGC1    | 4.6988E-07 | 3.9004E-06 | 1.532493   |
| GRK5        | NM_005308.2 GRK5         |   | 10 Homo sapiens GPRK5          | 5.0155E-06 | 2.2441E-05 | 1.53199956 |
| JARID2      | NM_004973.2 JARID2       |   | 6 Homo sapiens JMJ             | 3.2879E-07 | 3.0657E-06 | 1.53180339 |

## 5.0 Upreg

|           |                       |                                |            |            |            |
|-----------|-----------------------|--------------------------------|------------|------------|------------|
| TMEM42    | NM_144638.1 TMEM42    | 3 Homo sapiens MGC29956        | 3.8969E-05 | 0.00011152 | 1.53149505 |
| TPST2     | NM_00100856 TPST2     | 22 Homo sapiens tyrosylprotein | 7.8524E-06 | 3.1474E-05 | 1.53146801 |
| ARL4A     | NM_00103716 ARL4A     | 7 Homo sapiens ARL4            | 0.00025592 | 0.00051584 | 1.5301075  |
| ULK1      | XM_942125.1 ULK1      | PREDICTED: Homo sapiens u      | 2.5903E-07 | 2.571E-06  | 1.53006949 |
| TSPAN9    | NM_006675.3 TSPAN9    | 12 Homo sapiens PP1057; NET-!  | 4.9903E-09 | 1.9902E-07 | 1.52999377 |
| C12orf44  | NM_021934.3 C12ORF44  | 12 Homo sapiens FLJ11773       | 2.5172E-08 | 5.6631E-07 | 1.5297754  |
| MAST3     | XM_038150.5 MAST3     | 19 Homo sapiens KIAA0561       | 2.1027E-05 | 6.8585E-05 | 1.52957927 |
| SORL1     | NM_003105.3 SORL1     | 11 Homo sapiens LR11; LRP9; S  | 0.00419959 | 0.00546695 | 1.52897523 |
| FLJ10986  | NM_018291.2 FLJ10986  | 1 Homo sapiens RP11-242B9.1    | 0.01228847 | 0.0136428  | 1.52676519 |
| POLR3H    | NM_00101805 POLR3H    | 22 Homo sapiens RPC8; MGC29    | 0.00097376 | 0.00157084 | 1.52667419 |
| FLJ31306  | XM_00171796 FLJ31306  | 14 PREDICTED: Homo sapiens h   | 0.00013158 | 0.00029824 | 1.52594802 |
| CLCN3     | NM_001829.2 CLCN3     | 4 Homo sapiens CIC-3; CLC3     | 8.7201E-05 | 0.0002148  | 1.52560753 |
| ASB1      | NM_016114.3 ASB1      | 2 Homo sapiens MGC11165; KI    | 4.8099E-06 | 2.1776E-05 | 1.52503176 |
| TTC14     | NM_133462.1 TTC14     | 3 Homo sapiens DRDL5813; KI    | 0.00129024 | 0.00199798 | 1.52473895 |
| LOC644799 | XM_934554.1 LOC644799 | 20 PREDICTED: Homo sapiens h   | 2.8086E-08 | 5.9381E-07 | 1.52461179 |
| C1orf97   | NM_032705.2 C1ORF97   | 1 Homo sapiens MGC14801; FI    | 7.5697E-07 | 5.4664E-06 | 1.52363232 |
| LOC283788 | XM_00172358 LOC283788 | PREDICTED: Homo sapiens h      | 0.01769516 | 0.01857146 | 1.52164091 |
| ANKRD20A1 | NM_00101242 ANKRD20A1 | Homo sapiens DKFZp434A17       | 0.00035237 | 0.00067254 | 1.52112854 |
| GCLC      | NM_001498.2 GCLC      | 6 Homo sapiens GCS; GLCLC; i   | 0.00029204 | 0.00057425 | 1.52063592 |
| FAM131A   | NM_144635.3 FAM131A   | 3 Homo sapiens MGC21688; Pf    | 3.6373E-05 | 0.00010588 | 1.52006773 |
| SRXN1     | NM_080725.1 SRXN1     | 20 Homo sapiens Npn3; SRX1; c  | 4.6784E-09 | 1.9271E-07 | 1.520048   |
| ADARB1    | NM_00103304 ADARB1    | 21 Homo sapiens ADAR2a; ADA    | 0.00069206 | 0.00117655 | 1.51972419 |
| AXUD1     | NM_033027.2 AXUD1     | 3 Homo sapiens FAM130B; TAI    | 3.3168E-05 | 9.7854E-05 | 1.51966684 |
| CYP26B1   | NM_019885.2 CYP26B1   | 2 Homo sapiens CYP26A2; MG     | 3.0325E-07 | 2.9079E-06 | 1.51962212 |
| TRAK2     | NM_015049.1 TRAK2     | 2 Homo sapiens KIAA0549; GR    | 6.2268E-05 | 0.00016231 | 1.51897916 |
| ELL2      | NM_012081.3 ELL2      | Homo sapiens elongation fac    | 0.00246993 | 0.00346296 | 1.51875124 |
| TUBB4     | NM_006087.2 TUBB4     | 19 Homo sapiens TUBB5; beta-!  | 1.0463E-06 | 6.9389E-06 | 1.5172004  |
| C1orf66   | NM_015997.2 C1ORF66   | 1 Homo sapiens CGI-41          | 0.00010181 | 0.00024347 | 1.51710049 |
| COG3      | NM_031431.2 COG3      | 13 Homo sapiens SEC34          | 0.00247    | 0.0034625  | 1.51651692 |
| TMEM184C  | NM_018241.2 TMEM184C  | 4 Homo sapiens transmembrar    | 7.1994E-05 | 0.00018304 | 1.51628884 |
| NSUN6     | NM_182543.1 NSUN6     | 10 Homo sapiens 4933414E04R    | 0.00054598 | 0.0009709  | 1.51613875 |
| MERTK     | NM_006343.2 MERTK     | 2 Homo sapiens MGC133349; c    | 0.01084298 | 0.01228833 | 1.51513043 |
| HEYL      | NM_014571.2 HEYL      | 1 Homo sapiens MGC12623; H     | 4.9124E-06 | 2.2103E-05 | 1.51427218 |
| GRB2      | NM_002086.3 GRB2      | 17 Homo sapiens MST084; ASH    | 4.2631E-05 | 0.00011993 | 1.51418806 |
| TMEM206   | NM_018252.2 TMEM206   | 1 Homo sapiens C1orf75; RP11   | 5.7332E-06 | 2.4731E-05 | 1.51387588 |
| ZNF212    | NM_012256.2 ZNF212    | 7 Homo sapiens MGC9707; ZN     | 0.00011144 | 0.00026103 | 1.51360013 |
| CHKA      | XM_945706.1 CHKA      | PREDICTED: Homo sapiens c      | 2.7347E-06 | 1.4206E-05 | 1.51283378 |
| LOC643882 | XM_931879.1 LOC643882 | 12 PREDICTED: Homo sapiens h   | 0.00042412 | 0.00078591 | 1.51255575 |
| C16orf56  | NM_025082.1 C16ORF56  | 16 Homo sapiens FLJ13111       | 1.5E-06    | 9.0514E-06 | 1.51207269 |
| GOLGA8B   | NM_00102356 GOLGA8B   | Homo sapiens KIAA0855; GC      | 7.1004E-08 | 1.076E-06  | 1.51178702 |
| ZDHHC9    | NM_00100822 ZDHHC9    | Homo sapiens ZNF379; CGI-!     | 7.282E-05  | 0.00018477 | 1.51135251 |
| LOC653344 | XM_933085.1 LOC653344 | 15 PREDICTED: Homo sapiens s   | 7.5281E-08 | 1.1157E-06 | 1.51108564 |
| DYNLL2    | NM_080677.1 DYNLL2    | 17 Homo sapiens MGC17810; D    | 1.0161E-07 | 1.3974E-06 | 1.51091457 |
| TBCE      | NM_003193.3 TBCE      | 1 Homo sapiens KCS; KCS1; p    | 1.6232E-07 | 1.8989E-06 | 1.5103377  |
| TTYH3     | NM_025250.2 TTYH3     | 7 Homo sapiens KIAA1691        | 0.00019799 | 0.00041639 | 1.51014023 |
| NUDT22    | NM_032344.1 NUDT22    | 11 Homo sapiens MGC13045       | 2.7087E-05 | 8.3243E-05 | 1.51009113 |
| LOC346887 | XM_943533.1 LOC346887 | PREDICTED: Homo sapiens s      | 1.6521E-08 | 4.3143E-07 | 1.50991052 |
| EIF4EBP2  | NM_004096.3 EIF4EBP2  | 10 Homo sapiens 4EBP2          | 1.7981E-06 | 1.0407E-05 | 1.50955134 |
| CPSF3L    | NM_017871.3 CPSF3L    | 1 Homo sapiens RC68; RC-68;    | 4.4007E-06 | 2.0397E-05 | 1.508362   |
| TSC1      | NM_000368.3 TSC1      | 9 Homo sapiens TSC; LAM; MG    | 1.9794E-05 | 6.5388E-05 | 1.50793378 |
| B9D2      | NM_030578.2 B9D2      | 19 Homo sapiens MGC4093; ICI   | 0.00764938 | 0.00912641 | 1.50761467 |
| SPRY1     | NM_005841.1 SPRY1     | 4 Homo sapiens hSPRY1          | 0.05109334 | 0.04512713 | 1.50759071 |
| DGKQ      | NM_001347.2 DGKQ      | 4 Homo sapiens DAGK7; DAGK     | 5.9924E-08 | 9.6472E-07 | 1.50710209 |
| SCPEP1    | NM_021626.1 SCPEP1    | 17 Homo sapiens RISC; HSCP1    | 1.8633E-08 | 4.6843E-07 | 1.50702708 |
| INSIG2    | NM_016133.2 INSIG2    | 2 Homo sapiens MGC26273        | 8.4885E-06 | 3.3353E-05 | 1.5069367  |
| CPT2      | NM_000098.1 CPT2      | 1 Homo sapiens CPTASE; CPT1    | 1.3495E-05 | 4.8152E-05 | 1.50693222 |
| NECAP2    | NM_018090.3 NECAP2    | 1 Homo sapiens FLJ10420; RP    | 2.5964E-07 | 2.5741E-06 | 1.50675981 |
| ST7L      | NM_138729.2 ST7L      | 1 Homo sapiens FLJ11657; FLJ   | 0.01762678 | 0.01851075 | 1.50583137 |
| TMEM111   | NM_018447.1 TMEM111   | 3 Homo sapiens POB             | 1.5107E-05 | 5.2786E-05 | 1.50426718 |
| M160      | NM_174941.3 M160      | 12 Homo sapiens CD163B         | 5.4018E-06 | 2.3591E-05 | 1.50425137 |
| RNF216    | NM_019011.4 RNF216    | 7 Homo sapiens ZIN; UBCE7IP    | 1.0809E-05 | 4.0427E-05 | 1.50414623 |
| GTF2B     | NM_001514.3 GTF2B     | 1 Homo sapiens TF1IB; TF2B     | 1.587E-07  | 1.869E-06  | 1.50414001 |
| FAM105A   | NM_019018.1 FAM105A   | 5 Homo sapiens FLJ11127        | 0.03089259 | 0.02968801 | 1.50412807 |
| MT1A      | NM_005946.2 MT1A      | 16 Homo sapiens MTC; MT1; MC   | 8.8735E-06 | 3.4496E-05 | 1.50378617 |
| ACTR1B    | NM_005735.2 ACTR1B    | 2 Homo sapiens CTRN2; ARP1     | 3.0762E-07 | 2.9242E-06 | 1.50323018 |
| TOM1      | NM_005488.1 TOM1      | 22 Homo sapiens FLJ33404       | 0.00016302 | 0.00035616 | 1.50240534 |
| UBN1      | NM_00107951 UBN1      | 16 Homo sapiens VT4; VT        | 3.195E-07  | 3.0014E-06 | 1.50210735 |
| FAM188A   | NM_024948.2 FAM188A   | 10 Homo sapiens DERP5; MST1    | 4.9212E-08 | 8.4004E-07 | 1.50094772 |
| RABEP1    | NM_004703.3 RABEP1    | 17 Homo sapiens RABPT5; RAB    | 1.6337E-07 | 1.8985E-06 | 1.50079199 |
| ACAA1     | NM_001607.2 ACAA1     | 3 Homo sapiens THIO; ACAA; I   | 1.2304E-05 | 4.4927E-05 | 1.50067966 |

5.0 Upreg

|             |             |              |    |                           |                           |              |            |            |            |
|-------------|-------------|--------------|----|---------------------------|---------------------------|--------------|------------|------------|------------|
| NUDT18      | NM_024815.2 | NUDT18       | 8  | Homo sapiens              | FLJ22494                  | 4.6515E-05   | 0.00012879 | 1.50033758 |            |
| PIK3AP1     | NM_152309.2 | PIK3AP1      | 10 | Homo sapiens              | BCAP; RP11-3              | 0.0491696    | 0.04374066 | 1.49991423 |            |
| FAM53B      | NM_014661.3 | FAM53B       | 10 | Homo sapiens              | RP11-12J10.2              | 0.0053148    | 0.0066952  | 1.4994885  |            |
| SNX22       | NM_024798.2 | SNX22        | 15 | Homo sapiens              | FLJ13952                  | 0.00280947   | 0.00385462 | 1.49935108 |            |
| PLCG1       | NM_182811.1 | PLCG1        | 20 | Homo sapiens              | PLC1; PLCgam              | 0.00041369   | 0.00076982 | 1.49802776 |            |
| LOC10013109 | XM_00172620 | LOC100131096 |    |                           | PREDICTED: Homo sapiens h | 0.00047838   | 0.00086792 | 1.49764239 |            |
| PDE6D       | NM_002601.2 | PDE6D        | 2  | Homo sapiens              | PDED                      | 2.0453E-07   | 2.1885E-06 | 1.49649773 |            |
| BAP1        | NM_004656.2 | BAP1         | 3  | Homo sapiens              | KIAA0272; DK              | 0.00062789   | 0.00108682 | 1.49599503 |            |
| PPIL6       | NM_173672.1 | PPIL6        | 6  | Homo sapiens              | bA425D10.6;               | 0.01633101   | 0.01734935 | 1.49569884 |            |
| PTK6        | NM_005975.2 | PTK6         | 20 | Homo sapiens              | FLJ42088; BR              | 0.02659698   | 0.02628837 | 1.49558871 |            |
|             |             | Hs.580797    | 20 | MR1-GN0172-061100-005-hi  |                           | 0.0066299    | 0.00808264 | 1.49548997 |            |
| YIF1B       | NM_00103173 | YIF1B        | 19 | Homo sapiens              | FinGER8                   | 3.3047E-07   | 3.0715E-06 | 1.49499373 |            |
| RBL2        | NM_005611.2 | RBL2         | 16 | Homo sapiens              | Rb2; P130; FL             | 2.6536E-05   | 8.1867E-05 | 1.49251581 |            |
| EVI5L       | NM_145245.2 | EVI5L        | 19 | Homo sapiens              | ecotropic viral           | 2.3189E-06   | 1.2528E-05 | 1.49187078 |            |
| PTRH1       | NM_00100291 | PTRH1        | 9  | Homo sapiens              | MGC51999; P               | 0.00022156   | 0.00045611 | 1.49179936 |            |
| SPAG9       | NM_172345.1 | SPAG9        | 17 | Homo sapiens              | PHET; MGC74               | 2.8443E-05   | 8.6592E-05 | 1.49167543 |            |
| MTMR15      | NM_014967.3 | MTMR15       | 15 | Homo sapiens              | DKFZp451H23               | 0.00126168   | 0.00195929 | 1.49110747 |            |
| ABHD12      | NM_00104247 | ABHD12       | 20 | Homo sapiens              | DKFZP434P10               | 0.00234216   | 0.0033156  | 1.48983167 |            |
| PSCD1       | NM_017456.1 | PSCD1        | 17 | Homo sapiens              | D17S811E; B2              | 2.2051E-07   | 2.3171E-06 | 1.48931867 |            |
| TUSC2       | NM_007275.1 | TUSC2        | 3  | Homo sapiens              | FUS1; C3orf11             | 0.00114859   | 0.00181026 | 1.48908982 |            |
|             |             | Hs.371609    | 3  | Homo sapiens              | cDNA clone IM             | 9.4975E-06   | 3.6437E-05 | 1.48871371 |            |
| KLHL9       | NM_018847.1 | KLHL9        | 9  | Homo sapiens              | RP11-380P16.              | 2.2241E-07   | 2.3231E-06 | 1.48862245 |            |
| RAGE        | NM_014226.1 | RAGE         | 14 | Homo sapiens              | MOK; RAGE1                | 0.04884884   | 0.04351266 | 1.48835495 |            |
| PRKD2       | NM_016457.3 | PRKD2        | 19 | Homo sapiens              | HSPC187; PKC              | 0.00018667   | 0.00039696 | 1.48825985 |            |
| WDR19       | NM_025132.3 | WDR19        | 4  | Homo sapiens              | PWDMP; KIAA               | 0.00391477   | 0.00515274 | 1.4872549  |            |
| CABC1       | NM_020247.3 | CABC1        | 1  | Homo sapiens              | MGC4849; CO               | 3.4014E-07   | 3.125E-06  | 1.48703436 |            |
| ARL8B       | NM_018184.2 | ARL8B        | 3  | Homo sapiens              | FLJ10702; AR              | 8.7911E-09   | 2.9667E-07 | 1.48652931 |            |
| KIAA1128    | NM_018999.1 | KIAA1128     | 10 | Homo sapiens              | FLJ14262; bA              | 0.00033944   | 0.00065227 | 1.48590274 |            |
| DUSP1       | NM_004417.2 | DUSP1        | 5  | Homo sapiens              | HVH1; MKP1;               | 3.8235E-08   | 7.2301E-07 | 1.48578826 |            |
| ELMOD2      | NM_153702.1 | ELMOD2       | 4  | Homo sapiens              | MGC10084; 9               | 0.00607812   | 0.00752178 | 1.48529572 |            |
| ZNF503      | NM_032772.4 | ZNF503       | 10 | Homo sapiens              | zinc finger pro           | 1.4605E-06   | 8.8682E-06 | 1.48418726 |            |
| UBL7        | NM_032907.3 | UBL7         | 15 | Homo sapiens              | TCBA1; MGC1               | 0.00014095   | 0.00031572 | 1.48363918 |            |
| GPR158L1    | XM_936553.1 | GPR158L1     |    |                           | PREDICTED: Homo sapiens C | 0.05464785   | 0.04777127 | 1.48320128 |            |
| YIPF1       | NM_018982.3 | YIPF1        | 1  | Homo sapiens              | FinGER1; DJ1              | 7.581E-07    | 5.4701E-06 | 1.48255998 |            |
| PLCB2       | NM_004573.1 | PLCB2        | 15 | Homo sapiens              | FLJ38135                  | 0.0423925    | 0.03867649 | 1.48148406 |            |
| TMEM149     | NM_024660.1 | TMEM149      | 19 | Homo sapiens              | U2AF1L4; FLJ              | 0.03814826   | 0.0354306  | 1.48125102 |            |
| TBC1D20     | NM_144628.2 | TBC1D20      | 20 | Homo sapiens              | FLJ45119; C2              | 0.00020872   | 0.00043488 | 1.48063115 |            |
| LOC642076   | XM_00171749 | LOC642076    | 6  | PREDICTED: Homo sapiens s |                           | 0.0452058    | 0.04083135 | 1.48037349 |            |
| GIYD1       | NM_00101499 | GIYD1        | 16 | Homo sapiens              | GIY-YIG doma              | 0.0014944    | 0.00226144 | 1.47988149 |            |
| C1orf52     | NM_198077.1 | C1ORF52      | 1  | Homo sapiens              | RP11-234D19.              | 5.2782E-07   | 4.2644E-06 | 1.47875252 |            |
| CRK         | NM_016823.2 | CRK          | 17 | Homo sapiens              | PKII                      | 1.2049E-07   | 1.5616E-06 | 1.47807629 |            |
| ISCA1       | NM_030940.3 | ISCA1        | 9  | Homo sapiens              | hIscaA; RP11-5            | 3.618E-05    | 0.00010546 | 1.47799911 |            |
| RHBDF1      | NM_022450.2 | RHBDF1       | 16 | Homo sapiens              | gene -90; gen             | 2.5897E-06   | 1.3663E-05 | 1.477084   |            |
| NPTN        | NM_012428.1 | NPTN         | 15 | Homo sapiens              | SDFR1; GP5;               | 2.1333E-09   | 1.3182E-07 | 1.47663627 |            |
| PTGR2       | NM_152444.1 | PTGR2        | 14 | Homo sapiens              | FLJ39091; PG              | 0.00396079   | 0.00520394 | 1.47593399 |            |
| DIRC2       | NM_032839.1 | DIRC2        | 3  | Homo sapiens              | FLJ14784; RC              | 3.0645E-06   | 1.5408E-05 | 1.47521839 |            |
| TDRD7       | NM_014290.1 | TDRD7        | 9  | Homo sapiens              | PCTAIRE2BP;               | 0.00605828   | 0.0075004  | 1.47465533 |            |
| CADM4       | NM_145296.1 | CADM4        | 19 | Homo sapiens              | Necl-4; TSL2              | 0.00089289   | 0.0014597  | 1.4744944  |            |
| CHKB        | NM_152253.1 | CHKB         |    |                           | Homo sapiens              | CHKL; CHETK  | 0.00479881 | 0.00612611 | 1.47366469 |
| EPHA1       | NM_005232.3 | EPHA1        | 7  | Homo sapiens              | EPHT; MGC16:              | 1.052E-05    | 3.9562E-05 | 1.4736225  |            |
| TOP3B       | NM_003935.3 | TOP3B        | 22 | Homo sapiens              | FLJ39376                  | 7.0326E-06   | 2.8874E-05 | 1.47315583 |            |
| PIGS        | NM_033198.2 | PIGS         | 17 | Homo sapiens              | FLJ45226; DK              | 0.00254031   | 0.00354238 | 1.47302658 |            |
| GABPAP      | XM_938337.1 | GABPAP       |    |                           | Homo sapiens              | E4TF1; GABPE | 0.01485912 | 0.01599483 | 1.47289717 |
| C12orf5     | NM_020375.1 | C12ORF5      | 12 | Homo sapiens              | TIGAR                     | 0.0002199    | 0.00045343 | 1.47196032 |            |
| ZNF45       | NM_003425.2 | ZNF45        | 19 | Homo sapiens              | KOX5; ZNF13               | 0.00250515   | 0.00350114 | 1.47186511 |            |
| ZNF669      | NM_024804.1 | ZNF669       | 1  | Homo sapiens              | FLJ12606                  | 0.00206579   | 0.00297868 | 1.47164899 |            |
| FLVCR2      | NM_017791.1 | FLVCR2       | 14 | Homo sapiens              | FLVCR2; C14o              | 0.01947549   | 0.0201412  | 1.47076987 |            |
| IFNGR1      | NM_000416.1 | IFNGR1       | 6  | Homo sapiens              | CD119; IFNGF              | 5.4563E-08   | 8.9988E-07 | 1.47044471 |            |
| HSPC157     | NR_023919.1 | HSPC157      | 1  | Homo sapiens              | hypothetical L            | 2.2266E-05   | 7.1613E-05 | 1.47031518 |            |
| PIGF        | NM_173074.1 | PIGF         | 2  | Homo sapiens              | MGC32646; M               | 6.4912E-05   | 0.00016795 | 1.47009663 |            |
| HEATR5B     | NM_019024.1 | HEATR5B      | 2  | Homo sapiens              | KIAA1414                  | 1.517E-05    | 5.2966E-05 | 1.47005596 |            |
| ATXN1       | NM_000332.2 | ATXN1        | 6  | Homo sapiens              | SCA1; D6S50               | 0.0002181    | 0.00045037 | 1.46815741 |            |
| MIDN        | NM_177401.4 | MIDN         | 19 | Homo sapiens              | DKFZp547M07               | 4.9895E-06   | 2.2347E-05 | 1.46671018 |            |
|             |             | Hs.294603    | 14 | Homo sapiens              | cDNA FLJ1287              | 1.8047E-07   | 2.0171E-06 | 1.46663043 |            |
| ZBTB5       | NM_014872.1 | ZBTB5        | 9  | Homo sapiens              | zinc finger anc           | 9.0106E-05   | 0.0002204  | 1.46626645 |            |
|             |             | Hs.551538    | 7  | Homo sapiens              | mRNA; cDNA I              | 1.5661E-05   | 5.4419E-05 | 1.46592194 |            |
| FBXO33      | NM_203301.1 | FBXO33       | 14 | Homo sapiens              | c14_5247; Fb;             | 3.54E-07     | 3.212E-06  | 1.4645599  |            |
| MUM1L1      | NM_152423.2 | MUM1L1       |    |                           | Homo sapiens              | MGC129994; I | 0.0193043  | 0.0199948  | 1.46432057 |
| KIF1B       | NM_183416.2 | KIF1B        | 1  | Homo sapiens              | KIAA0591; HM              | 2.3834E-05   | 7.5495E-05 | 1.46381829 |            |
| CTSD        | NM_001909.3 | CTSD         | 11 | Homo sapiens              | CLN10; MGC2               | 0.00032207   | 0.00062285 | 1.46357488 |            |

5.0 Upreg

|           |             |           |    |                         |                            |            |            |            |
|-----------|-------------|-----------|----|-------------------------|----------------------------|------------|------------|------------|
| C15orf39  | NM_015492.3 | C15ORF39  | 15 | Homo sapiens            | DKFZP434H13                | 0.0011957  | 0.00187307 | 1.46249645 |
| POLR2J2   | NM_032959.4 | POLR2J2   | 7  | Homo sapiens            | MGC54043; M                | 5.5645E-07 | 4.4184E-06 | 1.46244472 |
| PRIC285   | NM_033405.2 | PRIC285   | 20 | Homo sapiens            | MGC138228; I               | 6.0235E-07 | 4.6523E-06 | 1.46091468 |
| CAPRIN2   | NM_023925.3 | CAPRIN2   | 12 | Homo sapiens            | MGC134848; I               | 2.9777E-06 | 1.5155E-05 | 1.46025547 |
| COG6      | NM_020751.1 | COG6      | 13 | Homo sapiens            | COD2; KIAA11               | 0.00019574 | 0.00041303 | 1.45967488 |
| TULP4     | NM_020245.3 | TULP4     | 6  | Homo sapiens            | RP3-442A17.1               | 0.00042201 | 0.00078248 | 1.45923134 |
| KIAA0672  | NM_014859.3 | KIAA0672  | 17 | Homo sapiens            | KIAA0672 gen               | 0.00029744 | 0.00058384 | 1.45777701 |
|           | Hs.296031   | HS.296031 |    |                         | Homo sapiens cDNA clone IM | 6.5228E-06 | 2.7344E-05 | 1.45767772 |
| ARIH1     | NM_005744.2 | ARIH1     | 15 | Homo sapiens            | ARI; HHARI; L              | 4.4218E-05 | 0.00012356 | 1.45751192 |
| CBX4      | NM_003655.2 | CBX4      | 17 | Homo sapiens            | NBP16; PC2; I              | 3.37E-05   | 9.9257E-05 | 1.45665845 |
| CGN       | NM_020770.1 | CGN       | 1  | Homo sapiens            | FLJ39281; DK               | 1.7724E-06 | 1.0305E-05 | 1.45635342 |
| MNAT1     | NM_002431.2 | MNAT1     | 14 | Homo sapiens            | MAT1; RNF66                | 5.2622E-06 | 2.3201E-05 | 1.4560753  |
| C18orf32  | NM_00103500 | C18ORF32  | 18 | Homo sapiens            | FLJ23458                   | 8.5902E-05 | 0.00021237 | 1.45591561 |
| ELF1      | NM_172373.2 | ELF1      | 13 | Homo sapiens            | E74-like factor            | 1.6943E-06 | 9.9639E-06 | 1.45587391 |
| MGC4677   | XM_939115.1 | MGC4677   | 2  | Homo sapiens            | MGC17532; M                | 1.253E-05  | 4.5523E-05 | 1.4556088  |
| C15orf21  | NM_00100526 | C15ORF21  | 15 | Homo sapiens            | D-PCa-2; FLJ3              | 0.00102943 | 0.00164761 | 1.45545621 |
| PIH1D1    | NM_017916.1 | PIH1D1    | 19 | Homo sapiens            | NOP17; FLJ20               | 2.7809E-05 | 8.5074E-05 | 1.45468352 |
| TRAFD1    | NM_006700.1 | TRAFD1    | 12 | Homo sapiens            | FLN29                      | 0.00360856 | 0.00479139 | 1.45453938 |
| EIF2S1    | NM_004094.4 | EIF2S1    | 14 | Homo sapiens            | EIF2A; EIF-2A              | 9.7664E-06 | 3.7289E-05 | 1.45444688 |
| ZNF252    | NR_023392.1 | ZNF252    | 8  | Homo sapiens            | zinc finger pro            | 2.7338E-06 | 1.421E-05  | 1.45334277 |
| ZNF557    | NM_00104438 | ZNF557    | 19 | Homo sapiens            | MGC4054                    | 0.00022896 | 0.00046914 | 1.45315813 |
| KDEL3     | NM_016657.1 | KDEL3     | 22 | Homo sapiens            | ERD2L3                     | 1.2472E-06 | 7.8898E-06 | 1.45291554 |
| TTC1      | NM_003314.1 | TTC1      | 5  | Homo sapiens            | TPR1                       | 4.1225E-06 | 1.9415E-05 | 1.45183187 |
| LOC645094 | XR_039085.1 | LOC645094 |    |                         | PREDICTED: Homo sapiens n  | 4.1327E-05 | 0.00011705 | 1.45133729 |
| SEZ6L2    | NM_201575.1 | SEZ6L2    |    |                         | Homo sapiens FLJ90517; PSI | 3.2528E-05 | 9.6257E-05 | 1.45018884 |
| WDR26     | NM_025160.4 | WDR26     | 1  | Homo sapiens            | FLJ21016; MII              | 0.00332846 | 0.00447227 | 1.44842864 |
| SUPT5H    | NM_003169.2 | SUPT5H    | 19 | Homo sapiens            | SPT5H; SPT5;               | 1.0644E-06 | 7.0274E-06 | 1.44809681 |
| STX8      | NM_004853.1 | STX8      | 17 | Homo sapiens            | CARB                       | 1.8307E-07 | 2.0332E-06 | 1.44764748 |
| ENDOD1    | XM_943182.1 | ENDOD1    | 11 | Homo sapiens            | MGC88092; KI               | 2.0181E-05 | 6.6342E-05 | 1.44632801 |
| APLP2     | NM_001642.1 | APLP2     | 11 | Homo sapiens            | CDEBP; APPH;               | 5.3942E-06 | 2.3582E-05 | 1.445811   |
| RAB1A     | NM_004161.3 | RAB1A     | 2  | Homo sapiens            | YPT1; RAB1; I              | 0.01698305 | 0.01795509 | 1.44526737 |
| TMEM132A  | NM_178031.2 | TMEM132A  | 11 | Homo sapiens            | DKFZp547E21                | 3.2889E-06 | 1.6294E-05 | 1.44471363 |
| SMA4      | NM_021652.2 | SMA4      |    |                         | Homo sapiens MGC22265      | 0.00036782 | 0.00069704 | 1.44467021 |
| GPAA1     | NM_003801.2 | GPAA1     | 8  | Homo sapiens            | hGAA1; GAA1                | 1.2616E-06 | 7.929E-06  | 1.44433586 |
| COBL      | NM_015198.2 | COBL      | 7  | Homo sapiens            | DKFZp686G13                | 3.3907E-07 | 3.1185E-06 | 1.4436396  |
| FBXO46    | XM_942691.1 | FBXO46    | 19 | PREDICTED: Homo sapiens | F                          | 0.00014894 | 0.00033007 | 1.44307705 |
| ZNF322A   | NM_024639.2 | ZNF322A   | 6  | Homo sapiens            | ZNF322; HCG:               | 0.00038598 | 0.00027611 | 1.4429024  |
| GLIPR2    | NM_022343.2 | GLIPR2    | 9  | Homo sapiens            | GLIPR2; GAPR               | 3.2888E-08 | 6.6182E-07 | 1.44269113 |
| EPHA2     | NM_004431.2 | EPHA2     | 1  | Homo sapiens            | ECK                        | 6.9254E-05 | 0.00017715 | 1.44240505 |
| ZFAND6    | NM_019006.2 | ZFAND6    | 15 | Homo sapiens            | ZA20D3; AWP                | 1.2762E-05 | 4.6156E-05 | 1.44163108 |
| KLHL7     | NM_00103171 | KLHL7     | 7  | Homo sapiens            | KLHL6; SBB12               | 0.02144579 | 0.02189752 | 1.44158627 |
| OXR1      | NM_181354.3 | OXR1      | 8  | Homo sapiens            | FLJ10125; FLJ              | 7.0021E-07 | 5.1714E-06 | 1.44088798 |
| GOLGA7    | NM_016099.2 | GOLGA7    | 8  | Homo sapiens            | MGC4876; GO                | 4.2201E-06 | 1.979E-05  | 1.4406838  |
| TPM1      | NM_00101800 | TPM1      | 15 | Homo sapiens            | TPM1-alpha; T              | 0.00989175 | 0.01136891 | 1.44042195 |
| C10orf47  | NM_153256.2 | C10ORF47  | 10 | Homo sapiens            | MGC35403                   | 0.0023561  | 0.00331103 | 1.44017376 |
| HTRA2     | NM_013247.4 | HTRA2     | 2  | Homo sapiens            | PARK13; OMI;               | 0.00059949 | 0.00104634 | 1.43907775 |
| TMEM50B   | NM_006134.4 | TMEM50B   | 21 | Homo sapiens            | C21orf4; HCVI              | 1.641E-06  | 9.7351E-06 | 1.43855838 |
| TIMP2     | XM_941104.1 | TIMP2     |    |                         | PREDICTED: Homo sapiens T  | 2.5929E-08 | 5.7449E-07 | 1.43843509 |
| ATP6V1D   | NM_015994.2 | ATP6V1D   | 14 | Homo sapiens            | ATP6M; VATD;               | 8.34E-09   | 2.8473E-07 | 1.43809614 |
| SAR1A     | NM_020150.3 | SAR1A     | 10 | Homo sapiens            | masra2; SARA               | 7.5383E-06 | 3.0396E-05 | 1.43769775 |
| BCDIN3D   | NM_181708.1 | BCDIN3D   | 12 | Homo sapiens            | BCDIN3 doma                | 7.5275E-06 | 3.038E-05  | 1.43754065 |
| ATP2B4    | NM_001684.3 | ATP2B4    | 1  | Homo sapiens            | DKFZp686M08                | 8.9587E-05 | 0.00021944 | 1.43683791 |
| ZFP90     | NM_133458.1 | ZFP90     | 16 | Homo sapiens            | ZNF756; NK1C               | 0.00026463 | 0.00052998 | 1.43631833 |
| B3GALT6   | NM_080605.2 | B3GALT6   | 1  | Homo sapiens            | beta3GalT6                 | 0.00230768 | 0.00327631 | 1.43611514 |
| TMEM99    | Hs.562720   | TMEM99    | 17 | Homo sapiens            | MGC21518                   | 4.235E-07  | 3.6429E-06 | 1.43605111 |
| C1GALT1C1 | NM_00101155 | C1GALT1C1 |    |                         | Homo sapiens MGC19947; C   | 0.00010988 | 0.00025833 | 1.43591168 |
| SNAP47    | NM_053052.2 | SNAP47    | 1  | Homo sapiens            | DKFZp686M1C                | 0.00051102 | 0.00091598 | 1.43567372 |
| PNPLA2    | NM_020376.2 | PNPLA2    | 11 | Homo sapiens            | PEDF-R; FP17!              | 9.0946E-05 | 0.00022184 | 1.4356207  |
| NDFIP1    | NM_030571.2 | NDFIP1    | 5  | Homo sapiens            | N4WBP5; MGC                | 0.03823977 | 0.03550431 | 1.43541447 |
| PXDN      | NM_012293.1 | PXDN      | 2  | Homo sapiens            | D2S448E; D2S               | 0.00043777 | 0.00080575 | 1.43526635 |
| ZFPM1     | NM_153813.1 | ZFPM1     | 16 | Homo sapiens            | FOG1; ZNF408               | 8.1153E-07 | 5.7608E-06 | 1.43466563 |
| WDR21A    | NM_015604.2 | WDR21A    | 14 | Homo sapiens            | MGC46524; W                | 0.00011124 | 0.00026076 | 1.4336557  |
| TEX2      | NM_018469.3 | TEX2      | 17 | Homo sapiens            | KIAA1738; TM               | 1.179E-06  | 7.5842E-06 | 1.43347724 |
| C12orf51  | NM_00110966 | C12ORF51  | 12 | Homo sapiens            | FLJ30208; KIA              | 7.4396E-05 | 0.00018795 | 1.4333792  |
| STK38     | NM_007271.2 | STK38     | 6  | Homo sapiens            | NDR1; NDR                  | 9.9237E-06 | 3.7775E-05 | 1.43278986 |
| PRKAB2    | NM_005399.3 | PRKAB2    | 1  | Homo sapiens            | MGC61468                   | 0.01181628 | 0.01320545 | 1.43222881 |
| HADHB     | NM_000183.2 | HADHB     | 2  | Homo sapiens            | MGC87480; M                | 5.7872E-05 | 0.00015317 | 1.43187043 |
| B4GALT4   | NM_003778.3 | B4GALT4   | 3  | Homo sapiens            | B4Gal-T4; bet              | 0.00132909 | 0.0020491  | 1.43152336 |
| KIAA1467  | NM_020853.1 | KIAA1467  | 12 | Homo sapiens            | DKFZp781O01                | 0.00886151 | 0.01036402 | 1.43124349 |
| LZTR1     | NM_006767.2 | LZTR1     | 22 | Homo sapiens            | MGC21205; T                | 3.6391E-08 | 7.002E-07  | 1.43121422 |

5.0 Upreg

|             |             |             |    |                           |                           |                |            |            |            |
|-------------|-------------|-------------|----|---------------------------|---------------------------|----------------|------------|------------|------------|
| FGFR1OP2    | NM_015633.1 | FGFR1OP2    | 12 | Homo sapiens              | DKFZp564018               | 4.5699E-06     | 2.0927E-05 | 1.43055207 |            |
| NR4A2       | NM_006186.2 | NR4A2       | 2  | Homo sapiens              | RNR1; NOT; T              | 2.8273E-06     | 1.455E-05  | 1.43044679 |            |
| ASAP2       | NM_003887.2 | ASAP2       | 2  | Homo sapiens              | ArfGAP with S             | 0.00011343     | 0.00026454 | 1.43025715 |            |
| COG2        | NM_007357.1 | COG2        | 1  | Homo sapiens              | LDLC                      | 0.00010292     | 0.00024558 | 1.42980729 |            |
| KLF2        | NM_016270.2 | KLF2        | 19 | Homo sapiens              | LKLF                      | 6.4445E-10     | 7.3433E-08 | 1.42942376 |            |
| CYB5A       | NM_148923.2 | CYB5A       | 18 | Homo sapiens              | MCB5; CYB5                | 3.2186E-07     | 3.0106E-06 | 1.4290106  |            |
| MAOB        | NM_000898.3 | MAOB        |    |                           | Homo sapiens              | MGC26382       | 9.0758E-07 | 6.2358E-06 | 1.42899703 |
| SEPHS2      | NM_012248.2 | SEPHS2      | 16 | Homo sapiens              | SPS2                      | 0.00017081     | 0.00036931 | 1.42886067 |            |
| NANS        | NM_018946.2 | NANS        | 9  | Homo sapiens              | SAS                       | 4.7591E-06     | 2.1579E-05 | 1.42819821 |            |
| SP4         | NM_003112.3 | SP4         | 7  | Homo sapiens              | MGC130009; S              | 0.00148726     | 0.00225297 | 1.42817297 |            |
| ATP6V0A1    | NM_005177.2 | ATP6V0A1    | 17 | Homo sapiens              | ATP6N1; VPP1              | 2.6009E-09     | 1.4535E-07 | 1.42570686 |            |
| FAM127A     | NM_003928.1 | FAM127A     |    |                           | Homo sapiens              | CXX1; MAR8C    | 8.274E-07  | 5.831E-06  | 1.42356529 |
| TMEM179B    | NM_199337.2 | TMEM179B    | 11 | Homo sapiens              | transmembran              | 1.6615E-06     | 9.8368E-06 | 1.42346117 |            |
| LOC255783   | XR_001409.1 | LOC255783   | 19 | Homo sapiens              | hypothetical p            | 2.1924E-05     | 7.0695E-05 | 1.42319241 |            |
| EIF1AY      | NM_004681.2 | EIF1AY      |    |                           | Homo sapiens              | eukaryotic tra | 0.00901871 | 0.01051983 | 1.42230719 |
| DHRS7B      | NM_015510.3 | DHRS7B      | 17 | Homo sapiens              | PRO2353; CG               | 9.1903E-06     | 3.5538E-05 | 1.42220493 |            |
| GFM1        | NM_024996.5 | GFM1        | 3  | Homo sapiens              | FLJ12662; EFC             | 1.4971E-06     | 9.0467E-06 | 1.42208643 |            |
| PLXNA3      | NM_017514.2 | PLXNA3      |    |                           | Homo sapiens              | XAP-6; HSSEX   | 0.00010434 | 0.00024836 | 1.42116604 |
| RHBDL2      | NM_017821.3 | RHBDL2      | 1  | Homo sapiens              | RRP2; MGC16'              | 0.0001352      | 0.00030488 | 1.42068836 |            |
| FES         | NM_002005.2 | FES         | 15 | Homo sapiens              | FPS                       | 1.1393E-05     | 4.2195E-05 | 1.42000589 |            |
| VPS25       | NM_032353.2 | VPS25       | 17 | Homo sapiens              | MGC10540; F               | 0.00010808     | 0.00025505 | 1.41946359 |            |
| SPRED2      | NM_181784.1 | SPRED2      | 2  | Homo sapiens              | MGC163164; I              | 3.9411E-05     | 0.00011256 | 1.41943555 |            |
| IGF2R       | NM_000876.1 | IGF2R       | 6  | Homo sapiens              | M6P-R; CD222              | 8.1259E-08     | 1.1843E-06 | 1.41920779 |            |
| C20orf127   | NM_080757.1 | C20orf127   | 20 | Homo sapiens              | dJ61404.6; M              | 4.4948E-08     | 7.8874E-07 | 1.41902486 |            |
| SEMA4F      | NM_004263.2 | SEMA4F      | 2  | Homo sapiens              | PRO2353; M-S              | 6.6417E-05     | 0.00017109 | 1.41896223 |            |
| ZNRF3       | XM_945269.1 | ZNRF3       | 22 | Homo sapiens              | RNF203; BK74              | 0.02890965     | 0.02811185 | 1.41854364 |            |
| PRPF18      | NM_003675.2 | PRPF18      | 10 | Homo sapiens              | PRP18; FLJ10;             | 0.0013498      | 0.00207519 | 1.41801221 |            |
| LOC10013017 | XR_038676.1 | LOC10013017 |    |                           | PREDICTED: Homo sapiens n | 0.00464058     | 0.00594922 | 1.41773729 |            |
| DRG2        | NM_001388.3 | DRG2        | 17 | Homo sapiens              | developmenta              | 6.5529E-05     | 0.00016925 | 1.41748218 |            |
| VTA1        | NM_016485.3 | VTA1        | 6  | Homo sapiens              | My012; FLJ27.             | 0.00322969     | 0.00435289 | 1.41747528 |            |
| NAT14       | NM_020378.2 | NAT14       | 19 | Homo sapiens              | KLP1                      | 6.0767E-06     | 2.5857E-05 | 1.41734047 |            |
| UBXN2B      | NM_00107761 | UBXN2B      | 8  | Homo sapiens              | p37                       | 0.00011036     | 0.00025904 | 1.41728677 |            |
| PTEN        | NM_000314.3 | PTEN        | 10 | Homo sapiens              | MMAC1; MHA                | 4.2335E-06     | 1.9842E-05 | 1.41660721 |            |
| KLHL28      | NM_017658.3 | KLHL28      | 14 | Homo sapiens              | FLJ20081; BT              | 0.00251381     | 0.00351045 | 1.41646608 |            |
| ELOVL5      | NM_021814.3 | ELOVL5      | 6  | Homo sapiens              | HELO1; RP3-4              | 1.2385E-06     | 7.863E-06  | 1.41644967 |            |
| CRYZL1      | NM_145858.1 | CRYZL1      | 21 | Homo sapiens              | QOH-1; 4P11               | 0.00244103     | 0.00343011 | 1.41644138 |            |
| NEURL1B     | NM_00114265 | NEURL1B     | 5  | Homo sapiens              | neutralized               | 0.00012459     | 0.0002858  | 1.41622796 |            |
| TNK2        | NM_005781.4 | TNK2        | 3  | Homo sapiens              | p21cdc42Hs; I             | 5.739E-05      | 0.0001524  | 1.4161273  |            |
| RIOK3       | NM_003831.2 | RIOK3       | 18 | Homo sapiens              | DKFZp779L13               | 2.1924E-06     | 1.1985E-05 | 1.41596382 |            |
| ID3         | NM_002167.2 | ID3         | 1  | Homo sapiens              | HEIR-1                    | 3.862E-10      | 5.9448E-08 | 1.41531547 |            |
| C8orf55     | NM_016647.1 | C8orf55     | 8  | Homo sapiens              | DSCD75                    | 3.7269E-07     | 3.3064E-06 | 1.41447817 |            |
|             | Hs.534061   | HS.534061   | 17 | full-length               | cDNA clone XCL0E          | 1.3809E-07     | 1.7017E-06 | 1.41262051 |            |
| LOC644852   | XM_946031.1 | LOC644852   |    |                           | PREDICTED: Homo sapiens h | 0.00858545     | 0.01008417 | 1.41230595 |            |
| MYO9A       | NM_006901.1 | MYO9A       | 15 | Homo sapiens              | MGC71859; FI              | 0.00779177     | 0.00926607 | 1.41215981 |            |
| HN1         | NM_016185.2 | HN1         | 17 | Homo sapiens              | HN1A; ARM2                | 2.154E-08      | 5.0804E-07 | 1.4104763  |            |
| DOPEY2      | NM_005128.2 | DOPEY2      | 21 | Homo sapiens              | C21orf5                   | 0.00132128     | 0.00203813 | 1.40942124 |            |
| FBXL18      | NM_024963.2 | FBXL18      |    |                           | Homo sapiens              | FLJ11467; FLJ  | 2.0125E-06 | 1.1283E-05 | 1.40927168 |
| STK40       | NM_032017.1 | STK40       | 1  | Homo sapiens              | Sgk495; SHIK              | 7.5736E-05     | 0.00019073 | 1.40913204 |            |
| CALM1       | NM_006888.2 | CALM1       | 14 | Homo sapiens              | PHKD; CALML               | 1.6073E-08     | 4.2606E-07 | 1.40895393 |            |
| NES         | NM_006617.1 | NES         | 1  | Homo sapiens              | FLJ21841; Nbl             | 0.00608414     | 0.00752816 | 1.40856505 |            |
| FLJ20021    | XM_028217.4 | FLJ20021    | 4  | PREDICTED: Homo sapiens h |                           | 2.9286E-06     | 1.4948E-05 | 1.40669602 |            |
| LOC730347   | XM_926614.1 | LOC730347   |    |                           | PREDICTED: Homo sapiens s | 0.03448315     | 0.03252582 | 1.40655172 |            |
| TBPL1       | NM_004865.2 | TBPL1       | 6  | Homo sapiens              | TRF2; STUD; I             | 1.0419E-07     | 1.424E-06  | 1.40561889 |            |
| IFI30       | NM_006332.3 | IFI30       | 19 | Homo sapiens              | MGC32056; IF              | 6.1701E-05     | 0.00016102 | 1.40561648 |            |
| SLC2A8      | NM_014580.3 | SLC2A8      | 9  | Homo sapiens              | GLUTX1; GLU               | 1.7897E-06     | 1.0379E-05 | 1.40483061 |            |
| ALS2        | NM_020919.2 | ALS2        | 2  | Homo sapiens              | MGC87187; IA              | 1.6223E-05     | 5.6062E-05 | 1.40463517 |            |
| LOC10012982 | XM_00172498 | LOC10012982 | 1  | PREDICTED: Homo sapiens h |                           | 0.00192732     | 0.00280622 | 1.40386971 |            |
| ANKRD13D    | XM_945557.1 | ANKRD13D    |    |                           | PREDICTED: Homo sapiens a | 0.04877064     | 0.04346948 | 1.40336242 |            |
| GSTP1       | NM_000852.2 | GSTP1       | 11 | Homo sapiens              | DFN7; GST3; I             | 9.8504E-10     | 9.1944E-08 | 1.40331283 |            |
| PDRG1       | NM_030815.2 | PDRG1       | 20 | Homo sapiens              | PDRG; C20orf              | 2.3979E-05     | 7.5871E-05 | 1.4027817  |            |
| KIAA1715    | NM_030650.1 | KIAA1715    | 2  | Homo sapiens              | LNP; MGC102               | 0.01052646     | 0.01199158 | 1.40250213 |            |
| LOC113386   | NM_138781.2 | LOC113386   | 19 | Homo sapiens              | FLJ44718; FLJ             | 0.00201047     | 0.00290751 | 1.40234176 |            |
| PPP1R7      | NM_002712.1 | PPP1R7      | 2  | Homo sapiens              | SDS22                     | 0.0001956      | 0.00041284 | 1.40220928 |            |
| LOC651575   | XM_940750.1 | LOC651575   |    |                           | PREDICTED: Homo sapiens s | 7.4264E-05     | 0.00018772 | 1.40195614 |            |
| LRRC39      | NM_144620.1 | LRRC39      | 1  | Homo sapiens              | MGC14816; D               | 0.04624371     | 0.04158474 | 1.40182176 |            |
| SPIRE1      | NM_020148.1 | SPIRE1      | 18 | Homo sapiens              | Spir-1; MGC1'             | 1.9923E-06     | 1.1198E-05 | 1.4015719  |            |
| SLC25A30    | NM_00101087 | SLC25A30    | 13 | Homo sapiens              | KMCP1                     | 0.00175762     | 0.00259532 | 1.40151996 |            |
| FLNB        | NM_001457.1 | FLNB        | 3  | Homo sapiens              | FLN1L; filamin            | 1.2308E-07     | 1.5858E-06 | 1.40151724 |            |
| RPS6KC1     | NM_012424.2 | RPS6KC1     | 1  | Homo sapiens              | RPK118; hum'              | 0.00320204     | 0.0043216  | 1.4013406  |            |
| C7orf43     | NM_018275.3 | C7orf43     | 7  | Homo sapiens              | FLJ10925; DK              | 0.00121315     | 0.00189635 | 1.40131548 |            |

## 5.0 Upreg

|             |             |             |    |                         |                  |            |            |            |
|-------------|-------------|-------------|----|-------------------------|------------------|------------|------------|------------|
| PCMTD2      | NM_018257.1 | PCMTD2      | 20 | Homo sapiens            | FLJ10883; C2     | 9.7045E-05 | 0.00023405 | 1.40128411 |
| PI4KAP2     | NM_199345.2 | PI4KAP2     |    | Homo sapiens            | FLJ44912; MG     | 5.7166E-08 | 9.3229E-07 | 1.40095986 |
| C12orf52    | NM_032848.1 | C12ORF52    | 12 | Homo sapiens            | FLJ14827         | 9.9818E-05 | 0.00023949 | 1.40059539 |
| ZNF773      | NM_198542.1 | ZNF773      | 19 | Homo sapiens            | ZNF419B; MG      | 0.01830758 | 0.01909316 | 1.40053298 |
| MRPL55      | NM_181462.1 | MRPL55      | 1  | Homo sapiens            | DKFZp686D13      | 3.8317E-05 | 0.00011008 | 1.40008623 |
| MRP63       | NM_024026.4 | MRP63       | 13 | Homo sapiens            | bMRP63; MGC      | 0.00195282 | 0.00283865 | 1.39999616 |
| CDK2AP2     | NM_005851.3 | CDK2AP2     | 11 | Homo sapiens            | p14; FLJ1063     | 0.00102667 | 0.0016441  | 1.39929231 |
| PCNX        | NM_014982.1 | PCNX        | 14 | Homo sapiens            | KIAA0805; PC     | 0.00076419 | 0.00128129 | 1.39926059 |
| IFFO2       | NM_00113626 | IFFO2       | 1  | Homo sapiens            | intermediate f   | 0.02711683 | 0.02668795 | 1.3991825  |
| GPC4        | NM_001448.2 | GPC4        |    | Homo sapiens            | K-glypican       | 2.9483E-05 | 8.8894E-05 | 1.39900328 |
| BRD7P2      | XR_039198.1 | BRD7P2      |    | PREDICTED: Homo sapiens | n                | 2.6862E-05 | 8.2757E-05 | 1.39816082 |
| INTS12      | NM_020395.2 | INTS12      | 4  | Homo sapiens            | PHF22; INT12     | 4.0177E-07 | 3.4972E-06 | 1.39764052 |
| AP1S2       | NM_003916.3 | AP1S2       |    | Homo sapiens            | MGC:1902; SI     | 2.4802E-05 | 7.7775E-05 | 1.39709361 |
| FBXO8       | NM_012180.2 | FBXO8       | 4  | Homo sapiens            | FBS; FBX8; D     | 0.0017315  | 0.00256279 | 1.39688858 |
| SLC5A8      | NM_145913.2 | SLC5A8      | 12 | Homo sapiens            | SMCT; MGC12      | 0.00759056 | 0.00906487 | 1.39665533 |
| C19orf28    | NM_174983.2 | C19ORF28    | 19 | Homo sapiens            | MGC20700; P      | 0.02814176 | 0.02751764 | 1.39461203 |
| ECGF1       | NM_001953.2 | ECGF1       | 22 | Homo sapiens            | TP; PDECGF; t    | 1.7505E-07 | 1.9844E-06 | 1.3936593  |
| C2orf44     | NM_025203.1 | C2ORF44     | 2  | Homo sapiens            | FLJ21945; PP     | 8.5828E-07 | 5.9671E-06 | 1.39204477 |
| CYB5R4      | NM_016230.2 | CYB5R4      | 6  | Homo sapiens            | RP4-676J13.1     | 0.00050535 | 0.00090748 | 1.39190573 |
| PRMT6       | NM_018137.1 | PRMT6       | 1  | Homo sapiens            | FLJ10559; HR     | 0.0016506  | 0.0024584  | 1.39184042 |
| TPRG1L      | NM_182752.3 | TPRG1L      | 1  | Homo sapiens            | RP11-46F15.3     | 1.5187E-08 | 4.1512E-07 | 1.39160598 |
| METRNL      | NM_00100443 | METRNL      |    | PREDICTED: Homo sapiens | n                | 5.2536E-05 | 0.00014214 | 1.39092758 |
| CSRP1       | NM_004078.1 | CSRP1       | 1  | Homo sapiens            | CRP; CRP1; D     | 3.4707E-06 | 1.7022E-05 | 1.39036149 |
| LOC93622    | NM_138699.2 | LOC93622    |    | PREDICTED: Homo sapiens | h                | 6.6398E-05 | 0.00017109 | 1.39032153 |
| MFF         | NM_020194.4 | MFF         | 2  | Homo sapiens            | MGC110913; (     | 2.499E-05  | 7.8226E-05 | 1.39016154 |
| C1orf166    | NM_024544.1 | C1ORF166    | 1  | Homo sapiens            | MULAN; FLJ12     | 0.00117886 | 0.00185099 | 1.39003667 |
| AP4E1       | NM_007347.3 | AP4E1       | 15 | Homo sapiens            | DKFZp686L12      | 0.00118858 | 0.00186391 | 1.38937405 |
| ADCK2       | NM_052853.3 | ADCK2       | 7  | Homo sapiens            | MGC20727; A      | 1.1565E-05 | 4.2689E-05 | 1.38789582 |
| LOC285074   | XM_942146.1 | LOC285074   | 2  | Homo sapiens            | hypothetical p   | 0.00040235 | 0.00075208 | 1.38776936 |
| ZNF860      | NM_00113767 | ZNF860      | 3  | Homo sapiens            | zinc finger pro  | 0.03872965 | 0.03586806 | 1.38760324 |
| LOC440776   | XM_496483.2 | LOC440776   | 21 | PREDICTED: Homo sapiens | h                | 0.02782946 | 0.02726696 | 1.38693846 |
| GNPTG       | NM_032520.3 | GNPTG       | 16 | Homo sapiens            | GNPTAG; LP2      | 4.8125E-05 | 0.00013233 | 1.38645318 |
| CTGLF7      | XM_00171478 | CTGLF7      | 10 | PREDICTED: Homo sapiens | c                | 3.6108E-08 | 6.9629E-07 | 1.38604022 |
| CALU        | NM_001219.2 | CALU        | 7  | Homo sapiens            | FLJ90608         | 1.2399E-06 | 7.8661E-06 | 1.38580838 |
| C13orf15    | NM_014059.1 | C13ORF15    | 13 | Homo sapiens            | RG-32; KIAA      | 7.9729E-05 | 0.00019913 | 1.38568347 |
| MPHOSPH8    | NM_017520.2 | MPHOSPH8    | 13 | Homo sapiens            | TWA3; FLJ352     | 0.00011707 | 0.00027145 | 1.38513553 |
|             | Hs.27048    | Hs.27048    | 12 | Homo sapiens            | cDNA FLJ3175     | 0.00012879 | 0.00029373 | 1.38417413 |
| CEACAM1     | NM_00102491 | CEACAM1     | 19 | Homo sapiens            | BGP1; BGPI; E    | 0.01213501 | 0.01350147 | 1.38411467 |
| TSNAX       | NM_005999.2 | TSNAX       | 1  | Homo sapiens            | TRAX             | 3.6866E-05 | 0.00010697 | 1.38349852 |
| C1orf122    | NM_198446.1 | C1ORF122    | 1  | Homo sapiens            | ALAESM; FLJ4     | 1.2506E-05 | 4.5456E-05 | 1.38307208 |
| NDUFAF1     | NM_016013.2 | NDUFAF1     | 15 | Homo sapiens            | CGI-6            | 9.0302E-05 | 0.0002207  | 1.38280352 |
|             | Hs.31532    | HS.31532    |    | Homo sapiens            | cDNA FLJ2678     | 0.00447722 | 0.00576675 | 1.38247159 |
| CACNA1H     | NM_021098.2 | CACNA1H     | 16 | Homo sapiens            | CACNA1HB; FI     | 0.00050184 | 0.00090284 | 1.38232548 |
| RAB11FIP5   | NM_015470.1 | RAB11FIP5   | 2  | Homo sapiens            | RIP11; pp75;     | 1.9038E-06 | 1.0882E-05 | 1.38211417 |
| MAML1       | NM_005491.1 | MAML1       |    | Homo sapiens            | CXorf6; F18; (   | 0.00557744 | 0.00698095 | 1.38165922 |
| SPTAN1      | NM_003127.1 | SPTAN1      | 9  | Homo sapiens            | FLJ44613; (AL    | 1.3935E-05 | 4.9501E-05 | 1.3816003  |
| RAB40B      | NM_006822.1 | RAB40B      | 17 | Homo sapiens            | FLJ42385; SE     | 3.3846E-07 | 3.1161E-06 | 1.38100709 |
| GMPR        | NM_006877.2 | GMPR        | 6  | Homo sapiens            | GMPR1            | 0.00264449 | 0.0036661  | 1.38097827 |
| PDCD6IP     | NM_013374.3 | PDCD6IP     | 3  | Homo sapiens            | MGC17003; Al     | 0.00013756 | 0.00030924 | 1.38057063 |
| TIMM22      | NM_013337.2 | TIMM22      | 17 | Homo sapiens            | TIM22; TEX4      | 7.1282E-06 | 2.9157E-05 | 1.38053148 |
| STAT2       | NM_005419.2 | STAT2       | 12 | Homo sapiens            | ISGF-3; STAT1    | 1.5101E-06 | 9.0998E-06 | 1.38047773 |
| SIGIRR      | NM_021805.1 | SIGIRR      | 11 | Homo sapiens            | TIR8; MGC11      | 0.01594274 | 0.0169883  | 1.38034238 |
| UBE4A       | NM_004788.2 | UBE4A       | 11 | Homo sapiens            | UFD2; KIAA01     | 3.5789E-07 | 3.2272E-06 | 1.3800007  |
| DKFZp761P04 | XM_291277.4 | DKFZP761P04 | 8  | PREDICTED: Homo sapiens | h                | 0.00054878 | 0.0009747  | 1.37936159 |
| TRIM66      | NM_014818.1 | TRIM66      | 11 | Homo sapiens            | tripartite motif | 0.00065219 | 0.00112005 | 1.37929398 |
| MFSD11      | NM_024311.2 | MFSD11      | 17 | Homo sapiens            | ET; FLJ22196;    | 0.00024207 | 0.00049255 | 1.37929008 |
| ITGA5       | NM_002205.2 | ITGA5       | 12 | Homo sapiens            | CD49e; VLA5A     | 6.8956E-05 | 0.00017655 | 1.37918466 |
| USP9X       | NM_004652.3 | USP9X       |    | Homo sapiens            | DFRX; FAF        | 0.00011356 | 0.00026478 | 1.37881802 |
| CAMSAP1L1   | NM_203459.1 | CAMSAP1L1   | 1  | Homo sapiens            | KIAA1078; MG     | 0.00080877 | 0.00134474 | 1.37817173 |
| PCSK7       | NM_004716.2 | PCSK7       | 11 | Homo sapiens            | SPC7; PC8; LF    | 0.00010557 | 0.00025082 | 1.37749854 |
| THADA       | NM_022065.3 | THADA       | 2  | Homo sapiens            | GITA; FLJ4401    | 0.00879533 | 0.0102976  | 1.37614112 |
| FAM160A2    | NM_032127.1 | FAM160A2    | 11 | Homo sapiens            | KIAA1759; FL     | 0.0092985  | 0.01079595 | 1.37607133 |
| HCFC1R1     | NM_00100201 | HCFC1R1     | 16 | Homo sapiens            | MGC99622; H      | 1.7739E-07 | 2.0056E-06 | 1.37591716 |
| FERMT2      | NM_006832.1 | FERMT2      | 14 | Homo sapiens            | KIND2; FLJ44     | 6.5345E-06 | 2.738E-05  | 1.37563893 |
| TIMP1       | NM_003254.2 | TIMP1       |    | Homo sapiens            | TIMP; FLJ903;    | 1.6405E-09 | 1.1515E-07 | 1.37525321 |
| REEP3       | NM_00100133 | REEP3       | 10 | Homo sapiens            | C1orf74          | 0.00891668 | 0.0104216  | 1.37440669 |
| RGS17       | NM_012419.4 | RGS17       | 6  | Homo sapiens            | RGS-17; hRGS     | 0.01194609 | 0.01332337 | 1.37388713 |
| SLC30A7     | NM_133496.3 | SLC30A7     | 1  | Homo sapiens            | ZnT-7; ZNT7;     | 2.7471E-06 | 1.4228E-05 | 1.37371062 |
| SAP130      | NM_024545.2 | SAP130      | 2  | Homo sapiens            | FLJ12761         | 2.1166E-06 | 1.1687E-05 | 1.37360862 |
| TPST1       | NM_003596.2 | TPST1       | 7  | Homo sapiens            | tyrosylprotein   | 0.00033725 | 0.00064849 | 1.37349551 |

## 5.0 Upreg

|             |                          |                                 |            |            |            |
|-------------|--------------------------|---------------------------------|------------|------------|------------|
| AKTIP       | NM_022476.2 AKTIP        | 16 Homo sapiens FTS; FT1        | 6.9265E-07 | 5.1415E-06 | 1.37336884 |
| MGMT        | NM_002412.2 MGMT         | 10 Homo sapiens O-6-methylgu.   | 0.00022163 | 0.00045615 | 1.37312678 |
| RRAS        | NM_006270.2 RRAS         | 19 Homo sapiens related RAS vi  | 8.872E-08  | 1.2616E-06 | 1.37219931 |
| EIF2B3      | NM_020365.2 EIF2B3       | 1 Homo sapiens EIF-2B; EIF2B    | 0.00022758 | 0.00046676 | 1.37215062 |
| LOC10013027 | XM_00172279 LOC10013027  | 16 PREDICTED: Homo sapiens h    | 0.00657968 | 0.00803481 | 1.37209675 |
| NUAK1       | NM_014840.2 NUAK1        | 12 Homo sapiens KIAA0537; AR    | 0.00025225 | 0.00050938 | 1.37196999 |
| FGFRL1      | NM_00100435 FGFRL1       | 4 Homo sapiens FGF5; FHFR       | 6.3585E-06 | 2.6758E-05 | 1.37168804 |
| LOC440957   | NM_00112476 LOC440957    | 3 Homo sapiens similar to CG3   | 4.4643E-06 | 2.0594E-05 | 1.37167866 |
| ALG6        | NM_013339.2 ALG6         | 1 Homo sapiens asparagine-lin   | 1.9537E-05 | 6.4833E-05 | 1.37126186 |
| LEP         | NM_000230.1 LEP          | 7 Homo sapiens OB; OBS          | 0.0001165  | 0.00027049 | 1.37105168 |
| DFNA5       | NM_004403.1 DFNA5        | 7 Homo sapiens ICERE-1          | 6.0616E-05 | 0.00015904 | 1.37075441 |
| ACY1        | NM_000666.1 ACY1         | 3 Homo sapiens ACY1D; ACYL      | 0.00216617 | 0.00310251 | 1.37051595 |
| MLLT6       | NM_005937.2 MLLT6        | 17 Homo sapiens AF17; FLJ234    | 7.3792E-05 | 0.00018685 | 1.37050181 |
| GRN         | NM_002087.2 GRN          | 17 Homo sapiens PEP1; PGRN; P   | 1.0031E-05 | 3.8116E-05 | 1.37020472 |
| PINK1       | NM_032409.1 PINK1        | 1 Homo sapiens FLJ27236; PA     | 4.7371E-05 | 0.00013066 | 1.37005935 |
| FTSJ3       | NM_017647.2 FTSJ3        | 17 Homo sapiens FLJ20062; EP    | 0.00064133 | 0.00110572 | 1.36972392 |
| LOC642236   | XM_942974.1 LOC642236    | PREDICTED: Homo sapiens s       | 0.000317   | 0.00061535 | 1.36920275 |
| TCTN3       | NM_015631.4 TCTN3        | Homo sapiens tectonic family    | 0.00140596 | 0.00215024 | 1.36890603 |
| ASAP1       | NM_018482.2 ASAP1        | 8 Homo sapiens ZG14P; AMAP      | 5.4335E-07 | 4.3458E-06 | 1.3682014  |
| QQLC3       | NM_152391.2 QQLC3        | 2 Homo sapiens C2orf22; MGC     | 1.4087E-06 | 8.6555E-06 | 1.36795629 |
| ZCCHC17     | NM_016505.2 ZCCHC17      | 1 Homo sapiens pNO40; PS1D;     | 4.6405E-07 | 3.8703E-06 | 1.36794413 |
| MRPL28      | NM_006428.3 MRPL28       | 16 Homo sapiens MGC8499; MA     | 0.02567488 | 0.02550627 | 1.36774998 |
| RNF20       | NM_019592.5 RNF20        | 9 Homo sapiens BRE1A; MGC1      | 3.869E-07  | 3.3913E-06 | 1.36772545 |
| CCDC3       | NM_031455.2 CCDC3        | 10 Homo sapiens FLJ20925; DK    | 0.01404718 | 0.0152556  | 1.36769506 |
| CSR2        | NM_001321.1 CSR2         | 12 Homo sapiens CRP2; LMO5;     | 1.2209E-06 | 7.7796E-06 | 1.3675823  |
| SPATA2L     | NM_152339.2 SPATA2L      | 16 Homo sapiens MGC26885; C     | 6.3446E-07 | 4.8364E-06 | 1.36699699 |
| FAM89B      | NM_152832.1 FAM89B       | 11 Homo sapiens MTRV1           | 6.1194E-07 | 4.7056E-06 | 1.3669349  |
| dJ341D10.1  | NM_00100753 dJ341D10.1 X | Homo sapiens dJ341D10.1 (r      | 0.0036357  | 0.00482232 | 1.36586772 |
| OCEL1       | NM_024578.1 OCEL1        | 19 Homo sapiens S863-9; FLJ2    | 5.3624E-06 | 2.3466E-05 | 1.3657295  |
| CCBL1       | NM_004059.3 CCBL1        | 9 Homo sapiens GTK; MGC296      | 0.00445344 | 0.00573866 | 1.36549266 |
|             | Hs.213541 HS.213541      | 12 Homo sapiens cDNA FLJ3208    | 9.4555E-07 | 6.4312E-06 | 1.36534589 |
| HES1        | NM_005524.2 HES1         | 3 Homo sapiens HHL; FLJ2040     | 0.00094868 | 0.00153801 | 1.36534045 |
| OSTF1       | NM_012383.3 OSTF1        | 9 Homo sapiens B4235014.1;      | 1.8333E-06 | 1.0555E-05 | 1.36516001 |
| PIK4CA      | NM_058004.1 PIK4CA       | 22 Homo sapiens pi4K230; FLJ1   | 4.4361E-06 | 2.0475E-05 | 1.36463033 |
| CYP27B1     | NM_000785.3 CYP27B1      | 12 Homo sapiens VDR; VDDRI;     | 0.00014269 | 0.00031882 | 1.36424447 |
| FLNC        | NM_001458.2 FLNC         | 7 Homo sapiens FLN2; ABPL; A    | 3.492E-07  | 3.175E-06  | 1.36374452 |
| RTN4IP1     | NM_032730.3 RTN4IP1      | 6 Homo sapiens N1MP; MGC12      | 7.8998E-06 | 3.1578E-05 | 1.36268675 |
| PCYOX1      | NM_016297.2 PCYOX1       | 2 Homo sapiens KIAA0908; PC     | 3.8871E-05 | 0.00011131 | 1.36215859 |
| BPHL        | NM_004332.1 BPHL         | 6 Homo sapiens MGC125930; I     | 0.00064276 | 0.00110776 | 1.3618137  |
| TTC37       | NM_014639.2 TTC37        | 5 Homo sapiens MGC32587; T      | 0.00034742 | 0.00066425 | 1.36154985 |
| AMY1B       | NM_00100821 AMY1B        | 1 Homo sapiens AMY1             | 0.02511892 | 0.02508176 | 1.3609972  |
| RPL28       | NM_000991.3 RPL28        | 19 Homo sapiens FLJ43307        | 0.00382127 | 0.00504329 | 1.35981999 |
| LOC728105   | XR_015328.2 LOC728105    | 3 PREDICTED: Homo sapiens n     | 0.00165601 | 0.00246519 | 1.35969829 |
| H1FX        | NM_006026.2 H1FX         | 3 Homo sapiens MGC8350; H1      | 8.6045E-06 | 3.3719E-05 | 1.35931385 |
| UBTD1       | NM_024954.3 UBTD1        | 10 Homo sapiens FLJ11807        | 0.00015523 | 0.00034194 | 1.35911076 |
| LRPAP1      | NM_002337.1 LRPAP1       | 4 Homo sapiens MGC138272;       | 1.0342E-06 | 6.8689E-06 | 1.3590476  |
| LOC650832   | XM_939919.1 LOC650832    | PREDICTED: Homo sapiens s       | 0.00014442 | 0.00032161 | 1.35879133 |
|             | Hs.481659 HS.481659      | 5 Homo sapiens cDNA FLJ2719     | 0.00985209 | 0.01133074 | 1.35830343 |
| ELAVL1      | NM_001419.2 ELAVL1       | 19 Homo sapiens MelG; HUR; E1   | 0.00023968 | 0.0004885  | 1.35739122 |
| TMEM55B     | NM_144568.1 TMEM55B      | 14 Homo sapiens DKFZp434M05     | 1.2871E-05 | 4.6453E-05 | 1.35705661 |
| FAR1        | NM_032228.4 FAR1         | 11 Homo sapiens FLJ33561; FAF   | 0.00034237 | 0.0006566  | 1.35684764 |
| TTC15       | NM_016030.5 TTC15        | 2 Homo sapiens FLJ36862; CG     | 0.00060628 | 0.00105608 | 1.35628626 |
| CLP1        | NM_006831.1 CLP1         | 11 Homo sapiens HEAB; hClp1     | 1.9895E-05 | 6.5649E-05 | 1.35602215 |
| GOLSYN      | NM_017786.2 GOLSYN       | 8 Homo sapiens FLJ20366; SY     | 1.4648E-05 | 5.1594E-05 | 1.3557924  |
| VPS8        | NM_015303.3 VPS8         | 3 Homo sapiens KIAA0804; FL     | 0.00040132 | 0.00075078 | 1.35560792 |
| PLCG2       | NM_002661.1 PLCG2        | 16 Homo sapiens phospholipase   | 3.5683E-07 | 3.2244E-06 | 1.35551072 |
| GPC2        | NM_152742.1 GPC2         | 7 Homo sapiens FLJ38962; DK     | 0.00137281 | 0.00210504 | 1.35532805 |
| EXTL2       | NM_00103302 EXTL2        | 1 Homo sapiens EXTR2            | 0.00035851 | 0.00068234 | 1.35454252 |
| AGRN        | NM_198576.2 AGRN         | 1 Homo sapiens FLJ45064         | 0.00019211 | 0.00040754 | 1.35443183 |
| FUK         | NM_145059.2 FUK          | 16 Homo sapiens 1110046B12R     | 0.00077115 | 0.00129147 | 1.35406036 |
| GPC1        | NM_002081.1 GPC1         | 2 Homo sapiens glypican; FLJ3   | 0.00268789 | 0.00371511 | 1.35337827 |
| FAM69B      | XM_942503.1 FAM69B       | PREDICTED: Homo sapiens fi      | 0.00047556 | 0.00086406 | 1.35320048 |
| LOC648852   | XM_940430.1 LOC648852    | PREDICTED: Homo sapiens h       | 2.9998E-05 | 9.0075E-05 | 1.35260518 |
| RNF123      | NM_022064.2 RNF123       | 3 Homo sapiens KPC1; DKFZp      | 6.6862E-06 | 2.7869E-05 | 1.35231269 |
| GMCL1       | NM_178439.3 GMCL1        | 2 Homo sapiens GCL1; BTBD1      | 0.00230832 | 0.00327563 | 1.35184377 |
| ZNF622      | NM_033414.2 ZNF622       | 5 Homo sapiens MGC17552; ZI     | 2.0115E-06 | 1.1284E-05 | 1.35150156 |
| EIF4G3      | NM_003760.2 EIF4G3       | 1 Homo sapiens eIF4GII          | 0.00016114 | 0.00035266 | 1.35113479 |
| DNAJB2      | NM_006736.5 DNAJB2       | 2 Homo sapiens HSPF3; HSJ1      | 2.3565E-05 | 7.4885E-05 | 1.3511255  |
| CPE         | NM_001873.1 CPE          | 4 Homo sapiens carboxypeptid    | 0.00015788 | 0.00034675 | 1.35091123 |
| CHRNA5      | NM_000745.2 CHRNA5       | 15 Homo sapiens cholinergic rec | 0.00086905 | 0.0014263  | 1.35005329 |

## 5.0 Upreg

|             |                          |                                 |            |            |            |
|-------------|--------------------------|---------------------------------|------------|------------|------------|
| AARS2       | NM_020745.1 AARS2        | 6 Homo sapiens KIAA1270; AA     | 0.0064436  | 0.00789501 | 1.35005058 |
| RNF40       | NM_014771.2 RNF40        | 16 Homo sapiens KIAA0661; DK    | 0.00871186 | 0.01020941 | 1.34970772 |
| ELOF1       | NM_032377.2 ELOF1        | 19 Homo sapiens ELF1            | 3.9131E-05 | 0.00011195 | 1.34936176 |
| ABCD3       | NM_002858.2 ABCD3        | 1 Homo sapiens ABC43; PXMP:     | 0.00492126 | 0.00626511 | 1.34934327 |
| C1orf50     | NM_024097.1 C1ORF50      | 1 Homo sapiens MGC955           | 8.6343E-05 | 0.00021334 | 1.34889304 |
| SSTR2       | NM_001050.2 SSTR2        | 17 Homo sapiens somatostatin r  | 0.00029203 | 0.00057438 | 1.34808312 |
| ZNF544      | NM_014480.1 ZNF544       | 19 Homo sapiens zinc finger pro | 0.00013432 | 0.00030327 | 1.34808091 |
| DCUN1D4     | NM_015115.1 DCUN1D4      | 4 Homo sapiens KIAA0276         | 3.0747E-05 | 9.1949E-05 | 1.34792638 |
| KIFC2       | NM_145754.2 KIFC2        | 8 Homo sapiens kinesin family   | 1.4685E-07 | 1.7675E-06 | 1.34766549 |
| EFNA4       | NM_005227.2 EFNA4        | 1 Homo sapiens EFL4; LERK4;     | 0.01103163 | 0.01246992 | 1.34720491 |
| OBFC2A      | NM_022837.1 OBFC2A       | 2 Homo sapiens MGC111163; I     | 2.1723E-05 | 7.0151E-05 | 1.34696311 |
| HIF1AN      | NM_017902.1 HIF1AN       | 10 Homo sapiens DKFZp762F18     | 0.00021534 | 0.00044561 | 1.34660955 |
| ZBTB17      | NM_003443.1 ZBTB17       | 1 Homo sapiens ZNF60; pHZ-6     | 0.00041277 | 0.00076877 | 1.34622058 |
| DENND4C     | NM_017925.4 DENND4C      | 9 Homo sapiens C9orf55B; FLJ    | 0.0035608  | 0.00474089 | 1.34591639 |
| TMSB15A     | NM_021992.2 TMSB15A      | Homo sapiens Tb15; TMSNB;       | 6.8414E-08 | 1.0513E-06 | 1.34566219 |
| PMVK        | NM_006556.2 PMVK         | 1 Homo sapiens PMKASE; HUM      | 0.00321468 | 0.00433665 | 1.34554646 |
|             | Hs.579631 HS.579631      | 19 AGENCOURT_10229596 NIH_      | 5.2597E-08 | 8.807E-07  | 1.34548297 |
| SNORA12     | NR_002954.1 SNORA12      | 10 Homo sapiens U108            | 1.4327E-08 | 3.9656E-07 | 1.34523248 |
| ANKRD46     | NM_198401.2 ANKRD46      | 8 Homo sapiens ankyrin repeat   | 0.00494137 | 0.00628342 | 1.34401847 |
| MTRF1L      | NM_019041.3 MTRF1L       | 6 Homo sapiens MGC102748        | 5.8934E-07 | 4.576E-06  | 1.34317107 |
|             | Hs.374278 HS.374278      | 16 Homo sapiens cDNA FLJ3838    | 0.00094078 | 0.00152661 | 1.34279151 |
| EXOC2       | NM_018303.4 EXOC2        | 6 Homo sapiens Sec5p; FLJ11C    | 0.0002321  | 0.00047503 | 1.34271851 |
| SYVN1       | NM_032431.2 SYVN1        | 11 Homo sapiens KIAA1810; MC    | 9.9842E-05 | 0.00023948 | 1.34258189 |
| KIAA0090    | NM_015047.1 KIAA0090     | 1 Homo sapiens RP1-43E13.1      | 2.0287E-05 | 6.6591E-05 | 1.34205474 |
| ACAA2       | NM_006111.1 ACAA2        | 18 Homo sapiens DSAEC           | 0.01524694 | 0.01636011 | 1.34159675 |
| ZFHX3       | NM_006885.2 ZFHX3        | 16 Homo sapiens ATBF1; ZFHX3    | 0.00280007 | 0.00384472 | 1.34127594 |
| ZNF577      | NM_032679.1 ZNF577       | 19 Homo sapiens MGC4400         | 0.02894351 | 0.02814166 | 1.34125677 |
| HSPC171     | NM_014187.1 HSPC171      | Homo sapiens HSPC171 prot:      | 4.6969E-06 | 2.143E-05  | 1.34122875 |
| CREG1       | NM_003851.2 CREG1        | 1 Homo sapiens CREG             | 1.0508E-06 | 6.9581E-06 | 1.34067435 |
| JAK1        | NM_002227.1 JAK1         | 1 Homo sapiens JAK1B; JAK1A     | 0.05196265 | 0.04574757 | 1.34065769 |
| CCDC50      | NM_174908.2 CCDC50       | 3 Homo sapiens C3orf6; DFNA     | 2.5597E-05 | 7.9643E-05 | 1.34059564 |
| DAGLB       | NM_139179.1 DAGLB        | 7 Homo sapiens FLJ33624; DA     | 0.00035576 | 0.00067739 | 1.34044721 |
| ASMTL       | XM_942506.1 ASMTL        | PREDICTED: Homo sapiens a       | 3.8891E-05 | 0.00011133 | 1.34030881 |
| C3orf10     | NM_018462.4 C3ORF10      | 3 Homo sapiens MDS027; HSP      | 4.6312E-07 | 3.8662E-06 | 1.34005476 |
| MRPS31      | NM_005830.2 MRPS31       | 13 Homo sapiens MRP-S31; IMC    | 6.5345E-06 | 2.7367E-05 | 1.33961793 |
| FLJ10213    | NM_018029.3 FLJ10213     | 3 Homo sapiens hypothetical p   | 0.00322859 | 0.00435207 | 1.33947221 |
| WDR70       | NM_018034.2 WDR70        | 5 Homo sapiens FLJ10233         | 5.2309E-06 | 2.3121E-05 | 1.33888458 |
| PRKAG1      | NM_002733.3 PRKAG1       | 12 Homo sapiens AMPKG; MGCE     | 0.00043047 | 0.00079481 | 1.33864563 |
| LOC552889   | NM_00113626 LOC552889    | 12 Homo sapiens hypothetical p  | 0.00037791 | 0.00071415 | 1.33859017 |
| LOC10013410 | XM_00171397 LOC100134108 | PREDICTED: Homo sapiens s       | 2.3746E-05 | 7.5297E-05 | 1.33850908 |
| TGIF2       | NM_021809.4 TGIF2        | 20 Homo sapiens TGFB-induced    | 0.04110595 | 0.03765149 | 1.33824906 |
| ATG10       | NM_031482.3 ATG10        | 5 Homo sapiens APG10; DKFZF     | 0.00501917 | 0.00637126 | 1.3369392  |
| FTSJD2      | NM_015050.2 FTSJD2       | 6 Homo sapiens FtsJ methyltra   | 0.00467814 | 0.00599036 | 1.33678404 |
| TUBB2A      | TUBB TUBB2A              | 6 Homo sapiens TUBB; TUBB2;     | 3.1566E-06 | 1.5763E-05 | 1.33657119 |
| SLC9A3R1    | NM_004252.1 SLC9A3R1     | 17 Homo sapiens NHERF1; NHEI    | 4.1056E-08 | 7.5047E-07 | 1.33602687 |
| ZZEF1       | NM_015113.3 ZZEF1        | 17 Homo sapiens FLJ10821; ZZ:   | 0.00431335 | 0.00558355 | 1.33583827 |
| LOC647389   | XM_936461.1 LOC647389    | PREDICTED: Homo sapiens h       | 0.04574214 | 0.04123513 | 1.33548199 |
| EHBP1L1     | NM_00109940 EHBP1L1      | 11 Homo sapiens FLJ35431; TA    | 4.6324E-05 | 0.0001283  | 1.33451568 |
| CBARA1      | NM_006077.1 CBARA1       | 10 Homo sapiens CALC; EFHA3;    | 0.00112159 | 0.00177439 | 1.33438493 |
| SMAP2       | NM_022733.1 SMAP2        | 1 Homo sapiens SMAP1L; RP1-     | 4.263E-06  | 1.9895E-05 | 1.33383282 |
| SUB1        | NM_006713.2 SUB1         | 5 Homo sapiens P15; p14; MG     | 0.00010201 | 0.0002438  | 1.33353591 |
| ADAM17      | NM_003183.4 ADAM17       | 2 Homo sapiens MGC17942; Cl     | 0.02007597 | 0.02067933 | 1.33268536 |
| ZBTB43      | NM_014007.2 ZBTB43       | 9 Homo sapiens ZNF297B; ZBT     | 0.0031261  | 0.00423213 | 1.33266112 |
| FBXO31      | NM_024735.2 FBXO31       | 16 Homo sapiens FBX14; Fbx31    | 1.1645E-06 | 7.5017E-06 | 1.33264418 |
| ANTXR1      | NM_032208.1 ANTXR1       | 2 Homo sapiens ATR; FLJ2177     | 0.00042556 | 0.00078773 | 1.33204916 |
| CRY2        | NM_021117.1 CRY2         | 11 Homo sapiens FLJ10332; PHI   | 0.01174889 | 0.01314521 | 1.3319294  |
| EDEM2       | NM_018217.1 EDEM2        | 20 Homo sapiens FLJ10783; bA    | 0.00016106 | 0.00035257 | 1.33123473 |
| UGCGL2      | NM_020121.2 UGCGL2       | 13 Homo sapiens MGC87276; Fl    | 0.00070514 | 0.00011946 | 1.33091523 |
| GIPC1       | NM_202468.1 GIPC1        | 19 Homo sapiens IIP-1; TIP-2; C | 1.5769E-07 | 1.8646E-06 | 1.33084288 |
| HLA-B       | NM_005514.5 HLA-B        | 6 Homo sapiens AS; HLA-B-55     | 1.0984E-06 | 7.1917E-06 | 1.33083146 |
| CRSP9       | NM_004270.3 CRSP9        | 5 Homo sapiens CRSP33; MGC      | 0.00158441 | 0.00237309 | 1.33078383 |
| FRS3        | NM_006653.3 FRS3         | 6 Homo sapiens MGC17167; FF     | 0.00910789 | 0.01061398 | 1.33058532 |
| TMEM9       | NM_016456.2 TMEM9        | 1 Homo sapiens TMEM9A           | 3.0336E-05 | 9.0844E-05 | 1.33014135 |
| MTMR10      | NM_017762.1 MTMR10       | 15 Homo sapiens FLJ20313        | 0.00010672 | 0.00025274 | 1.32926146 |
| REXO4       | NM_020385.2 REXO4        | 9 Homo sapiens XPMC2; XPMC      | 0.00017778 | 0.00038139 | 1.329163   |
| SLC25A14    | NM_022810.1 SLC25A14     | Homo sapiens MGC149543; I       | 0.01082652 | 0.01227444 | 1.32914837 |
| MFGES       | NM_005928.1 MFGES        | 15 Homo sapiens HsT19888; BA    | 8.158E-08  | 1.187E-06  | 1.32826268 |
| C14orf142   | NM_032490.3 C14ORF142    | 14 Homo sapiens MGC133207; I    | 0.00275501 | 0.00379414 | 1.32819015 |
| FAHD1       | NM_031208.1 FAHD1        | 16 Homo sapiens C16orf36; YIS   | 0.00016517 | 0.00035961 | 1.32808818 |
| FAM40B      | NM_020704.1 FAM40B       | 7 Homo sapiens family with sei  | 0.00094259 | 0.00152927 | 1.32801905 |



## 5.0 Upreg

|             |              |             |    |                              |            |            |            |
|-------------|--------------|-------------|----|------------------------------|------------|------------|------------|
| PLEKHF1     | NM_024310.2  | PLEKHF1     | 19 | Homo sapiens APPD; ZFYVE1    | 0.02553622 | 0.02540304 | 1.32788148 |
| KIAA1751    | XM_933934.1  | KIAA1751    | 1  | PREDICTED: Homo sapiens K    | 5.6617E-05 | 0.00015085 | 1.32764509 |
| CHMP2A      | NM_198426.1  | CHMP2A      | 19 | Homo sapiens VPS2; VPS2A;    | 2.8009E-06 | 1.4448E-05 | 1.32708132 |
| SNAPC3      | NM_00103969  | SNAPC3      | 9  | Homo sapiens PTFbeta; MGC    | 0.02352936 | 0.02372677 | 1.32693299 |
| PRO1853     | NM_144736.3  | PRO1853     | 2  | Homo sapiens hypothetical p  | 0.0023244  | 0.00329578 | 1.32674337 |
| MUT         | NM_000255.1  | MUT         | 6  | Homo sapiens MCM             | 0.0005025  | 0.00090383 | 1.32630707 |
| SUPT4H1     | NM_003168.1  | SUPT4H1     | 17 | Homo sapiens SPT4H; SUPT4    | 3.6489E-06 | 1.7639E-05 | 1.32542461 |
| RRAGA       | NM_006570.4  | RRAGA       | 9  | Homo sapiens RAGA; FIP-1     | 5.2307E-08 | 8.7752E-07 | 1.32538986 |
| ZKSCAN2     | NM_00101298  | ZKSCAN2     | 16 | Homo sapiens ZNF694; ZSC/    | 0.01391318 | 0.01513255 | 1.32520328 |
| GCC1        | NM_024523.5  | GCC1        | 7  | Homo sapiens FLJ22035; GC    | 2.691E-05  | 8.2817E-05 | 1.3251082  |
| C10orf61    | NM_015631.2  | C10ORF61    | 10 | Homo sapiens DKFZp564D11     | 0.0016826  | 0.00249799 | 1.32414907 |
| TMEM136     | NM_174926.1  | TMEM136     | 11 | Homo sapiens MGC17839        | 0.00018429 | 0.00039266 | 1.32399841 |
| POLR3A      | NM_007055.2  | POLR3A      | 10 | Homo sapiens RPC155; hRPC    | 1.965E-05  | 6.5133E-05 | 1.32361966 |
| NUDCD3      | NM_015332.2  | NUDCD3      | 7  | Homo sapiens KIAA1068; Nu    | 7.7354E-05 | 0.0001943  | 1.32329922 |
| CCDC84      | NM_198489.1  | CCDC84      | 11 | Homo sapiens DLNB14          | 2.16E-05   | 6.9933E-05 | 1.32312254 |
| C9orf119    | XM_937771.1  | C9ORF119    | 9  | Homo sapiens bA395P17.9      | 0.00037736 | 0.00071326 | 1.32310854 |
| SPHK2       | NM_020126.3  | SPHK2       | 19 | Homo sapiens sphingosine ki  | 0.00020814 | 0.0004342  | 1.32255699 |
| CENTG2      | NM_014914.2  | CENTG2      | 2  | Homo sapiens GGAP1; MGC7     | 5.4623E-06 | 2.3797E-05 | 1.32231431 |
| ZFC3H1      | NM_144982.3  | ZFC3H1      | 12 | Homo sapiens MGC90200; P     | 0.00302413 | 0.00411376 | 1.32211813 |
| C16orf48    | NM_032140.1  | C16ORF48    | 16 | Homo sapiens DAKV6410; DI    | 8.518E-07  | 5.9646E-06 | 1.32168059 |
| ABCB6       | NM_005689.1  | ABCB6       | 2  | Homo sapiens ABC; EST455     | 0.00457103 | 0.00587379 | 1.32119691 |
| TMEM141     | NM_032928.2  | TMEM141     | 9  | Homo sapiens MGC14141; R     | 3.1846E-05 | 9.4655E-05 | 1.32089451 |
| ASF1A       | NM_014034.1  | ASF1A       | 6  | Homo sapiens DKFZP547E21     | 0.00039981 | 0.0007486  | 1.32069868 |
| UNC84A      | NM_025154.2  | UNC84A      | 7  | Homo sapiens KIAA0810; SU    | 3.5863E-06 | 1.7442E-05 | 1.32009883 |
| LAPTM4A     | NM_014713.3  | LAPTM4A     | 2  | Homo sapiens LAPTM4; KIAA    | 5.7905E-05 | 0.00015321 | 1.31967541 |
| GPR137      | NM_020155.2  | GPR137      | 11 | Homo sapiens GPR137A; TM     | 3.0585E-05 | 9.1494E-05 | 1.31931708 |
| KLK5        | NM_012427.4  | KLK5        | 19 | Homo sapiens KLKL2; KLK-L    | 0.00514299 | 0.00650492 | 1.31920279 |
| STX2        | NM_001980.2  | STX2        | 12 | Homo sapiens MGC51014; S     | 1.0402E-05 | 3.9239E-05 | 1.3190393  |
| CRY1        | NM_004075.2  | CRY1        | 12 | Homo sapiens PHL11           | 0.0023079  | 0.00327556 | 1.31892681 |
| RSAD1       | NM_018346.1  | RSAD1       | 17 | Homo sapiens FLJ20975; FLJ   | 0.00077333 | 0.00129464 | 1.31857239 |
| C20orf3     | NM_020531.2  | C20ORF3     | 20 | Homo sapiens BSCv; APMAP     | 2.3561E-06 | 1.2659E-05 | 1.31838068 |
| MT1E        | NM_175617.2  | MT1E        | 16 | Homo sapiens MT1; MTD        | 2.9395E-07 | 2.8373E-06 | 1.31789857 |
| FAM116A     | NM_152678.1  | FAM116A     |    | PREDICTED: Homo sapiens fi   | 0.00049929 | 0.00089862 | 1.3172812  |
| C14orf109   | NM_015676.1  | C14ORF109   | 14 | Homo sapiens DKFZP564F11     | 5.0213E-05 | 0.00013716 | 1.31709072 |
| SYAP1       | NM_032796.2  | SYAP1       |    | Homo sapiens FLJ14495; DK    | 2.103E-05  | 6.8567E-05 | 1.31694616 |
| RICH2       | NM_014859.4  | RICH2       | 17 | Homo sapiens NPC-A-10; KIA   | 5.7486E-05 | 0.00015247 | 1.31689632 |
| IDS         | NM_000202.2  | IDS         |    | Homo sapiens MPS2; SIDS      | 0.05278926 | 0.04634974 | 1.31616966 |
| FLJ40722    | XM_945696.1  | FLJ40722    |    | PREDICTED: Homo sapiens h    | 0.00014199 | 0.00031765 | 1.31604464 |
| TMEM49      | NM_030938.2  | TMEM49      | 17 | Homo sapiens VMP1; DKFZP     | 2.3303E-06 | 1.2559E-05 | 1.31563277 |
| ATP6AP2     | NM_005765.2  | ATP6AP2     |    | Homo sapiens ELDF10; APT6    | 1.2149E-08 | 3.5652E-07 | 1.31488183 |
| LRWD1       | NM_152892.1  | LRWD1       | 7  | Homo sapiens DKFZp434K18     | 5.5095E-06 | 2.3979E-05 | 1.31472186 |
| TMEM191A    | XR_039958.1  | TMEM191A    | 22 | PREDICTED: Homo sapiens n    | 0.01480064 | 0.01594558 | 1.3144907  |
| COL4A5      | NM_033381.1  | COL4A5      |    | Homo sapiens MGC42377; A     | 0.00834002 | 0.00984068 | 1.31445247 |
| ACN9        | NM_020186.1  | ACN9        | 7  | Homo sapiens DC11            | 3.8441E-06 | 1.8381E-05 | 1.31398078 |
| LOC10013453 | XR_039501.1  | LOC10013453 | 7  | PREDICTED: Homo sapiens n    | 7.5675E-07 | 5.4693E-06 | 1.31396095 |
| LOC10013413 | XM_001712085 | LOC10013413 |    | PREDICTED: Homo sapiens s    | 8.2552E-08 | 1.1913E-06 | 1.31395352 |
| ATP6V0E2    | NM_145230.1  | ATP6V0E2    | 7  | Homo sapiens ATP6V0E2L; C    | 1.0017E-07 | 1.3951E-06 | 1.31373246 |
| BRSK1       | NM_032430.1  | BRSK1       | 19 | Homo sapiens KIAA1811; FL    | 9.2902E-05 | 0.00022605 | 1.31308123 |
| LOC10012926 | XM_00172312  | LOC10012926 |    | PREDICTED: Homo sapiens h    | 0.00998821 | 0.01145876 | 1.31275575 |
| BICD2       | NM_00100380  | BICD2       | 9  | Homo sapiens bA526D8.1; K    | 0.00220344 | 0.00314818 | 1.31258276 |
| BTG1        | NM_001731.1  | BTG1        | 12 | Homo sapiens B-cell transloc | 2.1249E-07 | 2.2544E-06 | 1.31236048 |
| CYB5D2      | NM_144611.2  | CYB5D2      | 17 | Homo sapiens MGC32124        | 0.00066542 | 0.00113898 | 1.31220196 |
| SCO2        | NM_005138.1  | SCO2        | 22 | Homo sapiens MGC125823; I    | 5.4054E-06 | 2.3596E-05 | 1.31199141 |
| CTBS        | NM_004388.1  | CTBS        | 1  | Homo sapiens CTB             | 0.03449995 | 0.03253816 | 1.31199138 |
| LHPP        | NM_022126.2  | LHPP        | 10 | Homo sapiens MGC142189; I    | 1.7665E-06 | 1.0292E-05 | 1.31187728 |
| GUSBL1      | NM_00103352  | GUSBL1      | 6  | Homo sapiens bA239L20.5; t   | 0.00078469 | 0.0013109  | 1.31166104 |
| ZNF277      | NM_021994.1  | ZNF277      | 7  | Homo sapiens ZNF277P; ZNF    | 7.2356E-06 | 2.9446E-05 | 1.31103958 |
| LOC10013405 | XM_00171709  | LOC10013405 |    | PREDICTED: Homo sapiens s    | 0.00060376 | 0.00105232 | 1.31015419 |
| LOC649679   | XM_945046.1  | LOC649679   |    | PREDICTED: Homo sapiens s    | 0.00586243 | 0.00728363 | 1.3101495  |
| CA2         | NM_000067.1  | CA2         | 8  | Homo sapiens Car2; CA-II; C  | 3.8567E-07 | 3.3907E-06 | 1.31012469 |
| ISG20L2     | NM_030980.1  | ISG20L2     | 1  | Homo sapiens FLJ12671        | 0.00903907 | 0.01053937 | 1.30887548 |
| SH3PXD2A    | NM_014631.2  | SH3PXD2A    | 10 | Homo sapiens SHJMD1; FIS     | 0.00150872 | 0.002278   | 1.30880628 |
| MAP3K1      | XM_042066.1  | MAP3K1      | 5  | Homo sapiens MAPKKK1; ME     | 0.00134855 | 0.00207363 | 1.30832951 |
| PGM3        | NM_015599.1  | PGM3        | 6  | Homo sapiens AGM1; PAGM;     | 0.00023415 | 0.00047856 | 1.30828824 |
| PFAAP5      | NM_014887.1  | PFAAP5      | 13 | Homo sapiens 92M18.3; CGO    | 7.0385E-05 | 0.00017963 | 1.307884   |
| ETS1        | NM_005238.2  | ETS1        | 11 | Homo sapiens FLJ10768; ET    | 0.0003022  | 0.00059172 | 1.30714563 |
| TMEM98      | NM_015544.2  | TMEM98      | 17 | Homo sapiens DKFZP564K19     | 6.992E-05  | 0.0001787  | 1.30706566 |
| CRIPT       | NM_014171.3  | CRIPT       | 2  | Homo sapiens HSPC139         | 2.6051E-06 | 1.3703E-05 | 1.30665929 |
| FAM73A      | NM_198549.1  | FAM73A      | 1  | Homo sapiens FLJ35093; DK    | 0.00308013 | 0.00418021 | 1.30663965 |
| PCOLCE2     | NM_013363.2  | PCOLCE2     | 3  | Homo sapiens PCPE2           | 0.01721598 | 0.01816632 | 1.30646721 |

## 5.0 Upreg

|           |             |           |    |                         |                          |            |            |            |
|-----------|-------------|-----------|----|-------------------------|--------------------------|------------|------------|------------|
| ITGA2     | NM_002203.2 | ITGA2     | 5  | Homo sapiens            | CD49B; VLAA              | 0.00305821 | 0.00415368 | 1.30555723 |
| SLC22A23  | NM_015482.1 | SLC22A23  | 6  | Homo sapiens            | solute carrier 1         | 0.05690079 | 0.04943534 | 1.30551856 |
| LOC728153 | XM_926814.1 | LOC728153 | 5  | PREDICTED: Homo sapiens | s                        | 0.00094426 | 0.00153141 | 1.30548532 |
| ACTA2     | NM_001613.1 | ACTA2     | 10 | Homo sapiens            | ACTSA                    | 0.00156032 | 0.00234302 | 1.30430655 |
| NKIRAS1   | NM_020345.3 | NKIRAS1   | 3  | Homo sapiens            | KBRAS1; kapp             | 7.2233E-06 | 2.9423E-05 | 1.3036889  |
| FOXO4     | NM_005938.1 | FOXO4     | X  | Homo sapiens            | AFX1; AFX; FC            | 0.01264908 | 0.01397595 | 1.30367834 |
| CNOT8     | NM_004779.4 | CNOT8     | 5  | Homo sapiens            | hCAF1; POP2;             | 0.00398334 | 0.00523123 | 1.30358693 |
| PIGC      | NM_153747.1 | PIGC      | 1  | Homo sapiens            | GPC2; MGC204             | 0.00131365 | 0.0020285  | 1.30319588 |
| DCUN1D3   | NM_173475.1 | DCUN1D3   | 16 | Homo sapiens            | MGC48972; FI             | 8.2726E-05 | 0.00020556 | 1.30292117 |
| ORAOV1    | NM_153451.2 | ORAOV1    | 11 | Homo sapiens            | TAOS1                    | 0.01152905 | 0.0129405  | 1.30278622 |
| IQCG      | NM_032263.2 | IQCG      | 3  | Homo sapiens            | DKFZp434B22              | 0.03827463 | 0.03552916 | 1.30262647 |
| MCFD2     | NM_139279.3 | MCFD2     | 2  | Homo sapiens            | DKFZp686G21              | 0.00458054 | 0.00588429 | 1.30226566 |
| UROS      | NM_000375.1 | UROS      | 10 | Homo sapiens            | uroporphyrino            | 7.0558E-07 | 5.1936E-06 | 1.30219743 |
| RNF113A   | NM_006978.1 | RNF113A   | X  | Homo sapiens            | ZNF183; RNF1             | 0.00802884 | 0.00951703 | 1.30208338 |
| MANBA     | NM_005908.2 | MANBA     | 4  | Homo sapiens            | MANB1                    | 0.00011102 | 0.00026039 | 1.30190797 |
| ANKRD9    | NM_152326.1 | ANKRD9    | 14 | Homo sapiens            | DKFZp21990               | 0.00012013 | 0.00227693 | 1.30146168 |
| CRABP2    | NM_001878.2 | CRABP2    | 1  | Homo sapiens            | CRABP-II; RBF            | 6.5759E-08 | 1.0303E-06 | 1.30129429 |
| MINPP1    | NM_004897.2 | MINPP1    | 10 | Homo sapiens            | MIPP; HIPER1             | 0.00017176 | 0.00037129 | 1.30093205 |
| CNO       | NM_018366.2 | CNO       | 4  | Homo sapiens            | FLJ11230                 | 0.00082635 | 0.00136954 | 1.30083659 |
| PROS1     | NM_000313.1 | PROS1     | 3  | Homo sapiens            | PROS; protein            | 0.01016664 | 0.01163455 | 1.30050751 |
| PITPNB    | NM_012399.3 | PITPNB    | 22 | Homo sapiens            | PI-TP-beta; VI           | 0.00117783 | 0.00185004 | 1.30040065 |
| SNAPC2    | NM_003083.1 | SNAPC2    | 19 | Homo sapiens            | PTFdelta; SNA            | 8.3606E-05 | 0.00020734 | 1.30013376 |
| C14orf179 | NM_052873.1 | C14ORF179 | 14 | Homo sapiens            | FLJ32173; MG             | 0.00021681 | 0.00044813 | 1.30007365 |
| SSR1      | NM_003144.2 | SSR1      | 6  | Homo sapiens            | DKFZp781N23              | 3.36E-06   | 1.6571E-05 | 1.30000688 |
| STX3      | NM_004177.3 | STX3      | 11 | Homo sapiens            | STX3A                    | 3.2186E-05 | 9.5405E-05 | 1.29997574 |
| RAB31     | NM_006868.2 | RAB31     | 18 | Homo sapiens            | Rab22B                   | 1.6037E-06 | 9.5653E-06 | 1.29984386 |
|           | Hs.508682   | HS.508682 |    |                         | AV762101 MDS Homo sapien | 3.0223E-09 | 1.5507E-07 | 1.29980815 |
| LAMC1     | NM_002293.2 | LAMC1     | 1  | Homo sapiens            | LAMB2; MGC8              | 1.6823E-07 | 1.932E-06  | 1.29944141 |
| CKB       | NM_001823.3 | CKB       | 14 | Homo sapiens            | B-CK; CKBB               | 2.6164E-08 | 5.768E-07  | 1.29942726 |
| NPDC1     | NM_015392.2 | NPDC1     | 9  | Homo sapiens            | CAB-; CAB; DI            | 0.03057804 | 0.02944702 | 1.29942162 |
| SNIP1     | NM_024700.2 | SNIP1     | 1  | Homo sapiens            | RP3-423B22.3             | 1.6949E-05 | 5.7978E-05 | 1.29941855 |
| EFNB2     | NM_004093.2 | EFNB2     | 13 | Homo sapiens            | MGC126227; I             | 1.1001E-06 | 7.1977E-06 | 1.29918662 |
| DBT       | Hs.444093   | DBT       | 1  | Homo sapiens            | BATE1; MGC1              | 0.00128761 | 0.00199497 | 1.29908824 |
| MTMR11    | NM_006697.1 | MTMR11    | 1  | Homo sapiens            | CRA; RP11-21             | 0.00196126 | 0.00284619 | 1.29877341 |
| NUCB2     | NM_005013.1 | NUCB2     | 11 | Homo sapiens            | NEFA                     | 8.9418E-05 | 0.00021909 | 1.2987765  |
| ARL1      | NM_001177.3 | ARL1      | 12 | Homo sapiens            | ARFL1                    | 2.0792E-05 | 6.8071E-05 | 1.29740642 |
| C1orf74   | NM_152485.2 | C1ORF74   | 1  | Homo sapiens            | FLJ25078                 | 0.0191787  | 0.01988113 | 1.2972474  |
| STAM      | NM_003473.2 | STAM      | 10 | Homo sapiens            | DKFZp686J231             | 0.0004139  | 0.00077005 | 1.29637322 |
| GCAT      | NM_014291.2 | GCAT      | 22 | Homo sapiens            | MGC23053; KI             | 1.6936E-07 | 1.9348E-06 | 1.29614675 |
| TUBB3     | NM_006086.2 | TUBB3     | 16 | Homo sapiens            | TUBB4; MC1R              | 2.5417E-08 | 5.7035E-07 | 1.29560377 |
| DIABLO    | NM_138930.2 | DIABLO    | 12 | Homo sapiens            | SCATE; FLJ105            | 3.3627E-07 | 3.109E-06  | 1.2952016  |
| RERE      | NM_012102.3 | RERE      | 1  | Homo sapiens            | ARP; ATN1L; A            | 0.01777836 | 0.01864093 | 1.29484981 |
| GXYLT1    | XM_290597.6 | GXYLT1    | 12 | Homo sapiens            | FLJ43151                 | 0.04816581 | 0.04303532 | 1.29449858 |
| CHD7      | NM_017780.2 | CHD7      | 8  | Homo sapiens            | FLJ20361; KIA            | 1.5954E-05 | 5.5307E-05 | 1.2930593  |
| PITPNM1   | NM_004910.1 | PITPNM1   | 11 | Homo sapiens            | NIR2; PITPNM             | 1.6875E-06 | 9.9302E-06 | 1.29299511 |
| KIAA0494  | NM_014774.1 | KIAA0494  | 1  | Homo sapiens            | RP11-8J9.3               | 7.9628E-05 | 0.00019893 | 1.29247499 |
| LOC641298 | XR_041850.1 | LOC641298 | 16 | PREDICTED: Homo sapiens | n                        | 0.00239759 | 0.00338098 | 1.29234519 |
| C10orf137 | NM_015608.2 | C10ORF137 | 10 | Homo sapiens            | RP11-383C5.6             | 9.4795E-07 | 6.4376E-06 | 1.29226095 |
| AP1G1     | NM_001128.5 | AP1G1     | 16 | Homo sapiens            | MGC18255; AI             | 0.00024239 | 0.00049298 | 1.29215888 |
| STK4      | NM_006282.2 | STK4      | 20 | Homo sapiens            | DKFZp686A20              | 4.994E-08  | 8.4426E-07 | 1.29181669 |
| LOC642333 | XM_939884.1 | LOC642333 |    |                         | PREDICTED: Homo sapiens  | s          | 4.2965E-05 | 0.00012059 |
| AKAP11    | NM_016248.2 | AKAP11    | 13 | Homo sapiens            | PRKA11; AKAF             | 0.00077582 | 0.00129806 | 1.29091731 |
| LOC730313 | XM_00172025 | LOC730313 | 7  | PREDICTED: Homo sapiens | h                        | 0.00240945 | 0.00339388 | 1.29065965 |
| AFF4      | NM_014423.2 | AFF4      | 5  | Homo sapiens            | SEC5Q31; MGC             | 0.00683354 | 0.00829173 | 1.29045818 |
| CLTC      | NM_004859.2 | CLTC      | 17 | Homo sapiens            | CHC17; CLTCL             | 0.00011607 | 0.00026984 | 1.29013342 |
| ANKRD54   | NM_138797.1 | ANKRD54   | 22 | Homo sapiens            | ankyrin repeat           | 0.00106699 | 0.00170059 | 1.28992126 |
| TP53RK    | NM_033550.3 | TP53RK    | 20 | Homo sapiens            | BUD32; PRPK;             | 0.01897561 | 0.01969387 | 1.28966245 |
| LOC441763 | XM_930284.1 | LOC441763 | 16 | PREDICTED: Homo sapiens | h                        | 8.6441E-06 | 3.3859E-05 | 1.28962674 |
| CPNE1     | NM_003915.2 | CPNE1     | 20 | Homo sapiens            | CPN1; COPN1;             | 1.4313E-06 | 8.7512E-06 | 1.28928113 |
| DDEF2     | NM_003887.1 | DDEF2     | 2  | Homo sapiens            | PAG3; Pap-alp            | 0.0014463  | 0.00220119 | 1.28868344 |
| SMAD5     | NM_005903.5 | SMAD5     | 5  | Homo sapiens            | Dwfc; DKFZp7             | 2.4046E-05 | 7.5947E-05 | 1.28852835 |
| SEC13     | NM_00113623 | SEC13     | 3  | Homo sapiens            | SEC13 homolc             | 8.5639E-07 | 5.9682E-06 | 1.28836655 |
| SEMA3E    | NM_012431.1 | SEMA3E    | 7  | Homo sapiens            | SEMAH; coll-5            | 0.00916791 | 0.01067259 | 1.28824744 |
| USP38     | NM_032557.4 | USP38     | 4  | Homo sapiens            | HP43.8KD; KI             | 2.8526E-05 | 8.6786E-05 | 1.28812996 |
| PTTG1IP   | NM_004339.2 | PTTG1IP   | 21 | Homo sapiens            | C21orf3; C21c            | 7.3562E-07 | 5.3518E-06 | 1.28808438 |
| PEA15     | NM_003768.2 | PEA15     | 1  | Homo sapiens            | HUMMAT1H; P              | 8.7778E-07 | 6.0739E-06 | 1.28791902 |
| SLC22A18  | NM_002555.3 | SLC22A18  | 11 | Homo sapiens            | IMPT1; ORCTL             | 0.02063096 | 0.02116404 | 1.28726167 |
| OSBPL5    | NM_145638.1 | OSBPL5    | 11 | Homo sapiens            | ORP5; FLJ429             | 0.00990863 | 0.01138532 | 1.28704962 |
| TSPYL1    | NM_003309.1 | TSPYL1    | 6  | Homo sapiens            | TSPYL                    | 1.0127E-06 | 6.7725E-06 | 1.28685292 |
| MXRA7     | NM_00100852 | MXRA7     | 17 | Homo sapiens            | TMAP1; PS1TF             | 0.01730874 | 0.01824884 | 1.28673713 |

5.0 Upreg

|           |             |           |    |                         |                 |            |            |            |
|-----------|-------------|-----------|----|-------------------------|-----------------|------------|------------|------------|
| AEBP2     | NM_153207.3 | AEBP2     | 12 | Homo sapiens            | MGC17922        | 0.01434385 | 0.01553165 | 1.28660294 |
| SH3PXD2B  | NM_00101799 | SH3PXD2B  | 5  | Homo sapiens            | HOFI; FLJ208:   | 0.00493313 | 0.00627658 | 1.28643911 |
| ZNF483    | NM_133464.1 | ZNF483    | 9  | Homo sapiens            | ZKSCAN16        | 0.02475393 | 0.02478783 | 1.28554379 |
| EXOSC4    | NM_019037.2 | EXOSC4    | 8  | Homo sapiens            | Rrp41p; p12A    | 5.4586E-05 | 0.0001466  | 1.28545438 |
| LOC643452 | XM_928241.1 | LOC643452 | 6  | PREDICTED: Homo sapiens | s               | 0.01375791 | 0.01500086 | 1.28516509 |
| SIPA1     | NM_153253.2 | SIPA1     | 11 | Homo sapiens            | MGC102688; S    | 0.00011559 | 0.0002688  | 1.28508596 |
| SLC15A4   | NM_145648.1 | SLC15A4   | 12 | Homo sapiens            | PHT1; FP1259    | 0.000175   | 0.0003767  | 1.28503912 |
| LUZP1     | NM_033631.2 | LUZP1     | 1  | Homo sapiens            | KIAA0601; LU    | 1.7038E-06 | 9.9993E-06 | 1.28490355 |
| C12orf31  | NM_032338.2 | C12ORF31  | 12 | Homo sapiens            | MGC104302; I    | 2.4101E-05 | 7.6037E-05 | 1.28434231 |
| STK19     | NM_032454.1 | STK19     | 6  | Homo sapiens            | RP1; G11; D6:   | 0.00085852 | 0.0014122  | 1.28401987 |
| C6orf12   | XM_379403.3 | C6ORF12   |    | PREDICTED: Homo sapiens | c               | 0.05702187 | 0.04951112 | 1.28354596 |
| CLPTM1    | NM_001294.1 | CLPTM1    | 19 | Homo sapiens            | cleft lip and p | 4.545E-07  | 3.8234E-06 | 1.28309824 |
| SEC11C    | NM_033280.1 | SEC11C    | 18 | Homo sapiens            | SPC21; SPCS4    | 6.7364E-08 | 1.0406E-06 | 1.28253031 |
| NR2C1     | NM_003297.1 | NR2C1     | 12 | Homo sapiens            | TR2-11; TR2     | 0.0017883  | 0.00263617 | 1.28236096 |
| PSMD3     | NM_002809.2 | PSMD3     | 17 | Homo sapiens            | RPN3; P58; S    | 0.00457939 | 0.00588366 | 1.28219526 |
| LAMP2     | NM_002294.1 | LAMP2     |    | Homo sapiens            | CD107b; LAM     | 7.3351E-06 | 2.9727E-05 | 1.28211429 |
| RNGTT     | NM_003800.1 | RNGTT     | 6  | Homo sapiens            | HCE1; hCAP; C   | 7.7622E-06 | 3.117E-05  | 1.28127296 |
| RB1CC1    | NM_014781.3 | RB1CC1    | 8  | Homo sapiens            | FIP200; CC1;    | 0.00012403 | 0.00028473 | 1.28113584 |
| PAQR3     | NM_177453.2 | PAQR3     | 4  | Homo sapiens            | RKTG            | 0.00145523 | 0.00221133 | 1.2798149  |
| SLC39A3   | NM_213568.1 | SLC39A3   | 19 | Homo sapiens            | ZIP3            | 0.00013052 | 0.00029667 | 1.2794971  |
| GDI1      | NM_001493.1 | GDI1      |    | Homo sapiens            | OPHN2; MRX4     | 4.4907E-06 | 2.0683E-05 | 1.27945199 |
| ZBTB40    | NM_014870.2 | ZBTB40    | 1  | Homo sapiens            | KIAA0478; MC    | 6.0882E-05 | 0.00015955 | 1.27932423 |
| SPRY2     | NM_005842.2 | SPRY2     | 13 | Homo sapiens            | hSPRY2; MGC:    | 0.00366132 | 0.00485043 | 1.27923094 |
|           | Hs.279842   | HS.279842 | 1  | Homo sapiens            | HSPC157 prot    | 0.00095741 | 0.00154816 | 1.27840596 |
| C6orf211  | NM_024573.1 | C6ORF211  | 6  | Homo sapiens            | FLJ12910; DK    | 0.0532766  | 0.04673554 | 1.27825342 |
| BNIP3L    | NM_004331.2 | BNIP3L    | 8  | Homo sapiens            | BNIP3a; NIX     | 0.00110388 | 0.00174954 | 1.27783249 |
| SGTA      | NM_003021.3 | SGTA      | 19 | Homo sapiens            | hSGT; SGT       | 0.00194159 | 0.00282419 | 1.27722174 |
| BTAF1     | NM_003972.2 | BTAF1     | 10 | Homo sapiens            | TAF172; KIAA    | 4.585E-05  | 0.00012735 | 1.27682853 |
| ISCA2     | NM_194279.1 | ISCA2     | 14 | Homo sapiens            | HBLD1; ISA2;    | 0.02648377 | 0.02620305 | 1.27679408 |
| HLTF      | NM_003071.2 | HLTF      | 3  | Homo sapiens            | ZBU1; SMARC     | 1.8333E-05 | 6.163E-05  | 1.27663562 |
| MED7      | NM_00110081 | MED7      | 5  | Homo sapiens            | CRSP9; CRSP:    | 0.00977318 | 0.01125622 | 1.27592693 |
| SLC38A10  | NM_138570.1 | SLC38A10  | 17 | Homo sapiens            | MGC15523; FL    | 0.00156679 | 0.00235153 | 1.27529671 |
| LOC648399 | XM_926857.1 | LOC648399 |    | PREDICTED: Homo sapiens | s               | 0.00030732 | 0.00060041 | 1.27498881 |
| NXF1      | NM_006362.4 | NXF1      | 11 | Homo sapiens            | MEX67; TAP; I   | 0.00018317 | 0.00039085 | 1.27405076 |
| LPCAT3    | NM_005768.5 | LPCAT3    | 12 | Homo sapiens            | C3F; OACT5; r   | 8.6848E-06 | 3.3973E-05 | 1.2736647  |
| FAM50A    | NM_004699.1 | FAM50A    |    | Homo sapiens            | DXS9928E; 9F    | 2.0228E-07 | 2.175E-06  | 1.27216368 |
| ITM2C     | NM_00101251 | ITM2C     | 2  | Homo sapiens            | E25; ITM3; BF   | 4.1928E-08 | 7.6008E-07 | 1.27184575 |
| ZNF672    | NM_024836.1 | ZNF672    | 1  | Homo sapiens            | FLJ22301        | 0.0032403  | 0.00436518 | 1.27180607 |
| PRKCSH    | NM_00100132 | PRKCSH    | 19 | Homo sapiens            | G19P1; AGE-R    | 1.3145E-05 | 4.725E-05  | 1.27172804 |
| SMCR5     | NR_024007.1 | SMCR5     | 17 | Homo sapiens            | Smith-Mageni:   | 0.00151417 | 0.00228506 | 1.27134733 |
| MAP2K1IP1 | NM_021970.2 | MAP2K1IP1 | 4  | Homo sapiens            | MP1             | 3.8557E-05 | 0.00011055 | 1.27122805 |
|           | Hs.413494   | HS.413494 | 10 | Homo sapiens            | cDNA: FLJ213    | 0.00013736 | 0.00030895 | 1.27112322 |
| THEM2     | NM_018473.2 | THEM2     | 6  | Homo sapiens            | HT012; PNAS-    | 6.9205E-06 | 2.8561E-05 | 1.2711178  |
| EPAS1     | NM_001430.3 | EPAS1     | 2  | Homo sapiens            | HLF; ECYT4; F   | 0.00141851 | 0.00216377 | 1.2706934  |
| CMC1      | NM_182523.1 | CMC1      | 3  | Homo sapiens            | DKFZp779D08     | 0.00043264 | 0.00079797 | 1.26979668 |
| C6orf129  | NM_138493.1 | C6ORF129  | 6  | Homo sapiens            | HSPC265; MG     | 0.00024428 | 0.0004959  | 1.26954765 |
| CD2BP2    | NM_006110.1 | CD2BP2    | 16 | Homo sapiens            | FWP010; LIN1    | 9.621E-07  | 6.5185E-06 | 1.26943791 |
| EVI5      | NM_005665.4 | EVI5      | 1  | Homo sapiens            | NB4S            | 0.00256793 | 0.00357521 | 1.26939489 |
| LSMD1     | NM_032356.3 | LSMD1     | 17 | Homo sapiens            | PFAAP2; MGC:    | 3.2132E-06 | 1.5964E-05 | 1.26929539 |
| APBP2     | NM_006380.2 | APBP2     | 17 | Homo sapiens            | PAT1; KIAA02:   | 9.2877E-05 | 0.00022605 | 1.26904744 |
| FIG4      | NM_014845.4 | FIG4      | 6  | Homo sapiens            | SAC3; RP1-24    | 0.00638696 | 0.00783327 | 1.26870482 |
| TDP1      | NM_018319.3 | TDP1      | 14 | Homo sapiens            | FLJ11090; MG    | 0.00161613 | 0.00241443 | 1.26843251 |
| GOPC      | NM_020399.2 | GOPC      | 6  | Homo sapiens            | GOPC1; FIG; C   | 0.00302487 | 0.00411412 | 1.26804253 |
| PPP3CB    | NM_021132.1 | PPP3CB    | 10 | Homo sapiens            | CALNA2; CALN    | 0.00167439 | 0.00248707 | 1.26773945 |
| C20orf46  | NM_018354.1 | C20ORF46  | 20 | Homo sapiens            | FLJ11190        | 3.5565E-05 | 0.00010408 | 1.26719141 |
| UBE2D4    | NM_015983.2 | UBE2D4    | 7  | Homo sapiens            | HBUCE1          | 0.00162476 | 0.00242484 | 1.26625109 |
| CHES1     | NM_005197.2 | CHES1     | 14 | Homo sapiens            | C14orf116; FC   | 0.00019825 | 0.00041673 | 1.26563783 |
| COMMD9    | NM_014186.1 | COMMD9    |    | Homo sapiens            | FLJ31106; HS    | 0.00021927 | 0.00045247 | 1.26562856 |
| CTSH      | NM_004390.2 | CTSH      | 15 | Homo sapiens            | CPSB; ACC-4;    | 0.00820631 | 0.0097038  | 1.26527363 |
| SPNS1     | NM_032038.1 | SPNS1     | 16 | Homo sapiens            | SPINL; FLJ38:   | 0.00013481 | 0.00030414 | 1.26501714 |
| C17orf63  | NM_018182.1 | C17ORF63  | 17 | Homo sapiens            | FLJ10700        | 0.01396801 | 0.01518277 | 1.26487214 |
|           | Hs.163752   | HS.163752 | 19 | zr87e09.r1              | NCI_CGAP_GCB1   | 5.1073E-05 | 0.00013908 | 1.26477815 |
| CHSY1     | NM_014918.3 | CHSY1     | 15 | Homo sapiens            | CSS1; KIAA09    | 6.3933E-07 | 4.8609E-06 | 1.26468211 |
| LOC92249  | NR_015353.1 | LOC92249  |    | Homo sapiens            | hypothetical L  | 0.05236476 | 0.04603692 | 1.26414813 |
| LRRCS58   | NM_00109967 | LRRCS58   | 3  | Homo sapiens            | luxine rich re  | 0.00034575 | 0.00066149 | 1.26414322 |
| RAXL1     | NM_032753.2 | RAXL1     | 19 | Homo sapiens            | QRX; MGC156     | 0.01159385 | 0.0129966  | 1.26356955 |
| PRRC1     | NM_130809.2 | PRRC1     | 5  | Homo sapiens            | FLJ32875        | 6.5306E-05 | 0.00016883 | 1.2634171  |
| FRAP1     | NM_004958.2 | FRAP1     | 1  | Homo sapiens            | RAPT1; FLJ44:   | 1.125E-05  | 4.1756E-05 | 1.26338066 |
| DUSP6     | NM_001946.2 | DUSP6     | 12 | Homo sapiens            | MKP3; PYST1     | 5.6242E-07 | 4.4497E-06 | 1.26326407 |
| KLF4      | NM_004235.3 | KLF4      | 9  | Homo sapiens            | GKLF; EZF       | 0.00424549 | 0.00551524 | 1.26315793 |

## 5.0 Upreg

|             |                         |   |                                         |            |            |            |
|-------------|-------------------------|---|-----------------------------------------|------------|------------|------------|
| MICB        | NM_005931.2 MICB        |   | 6 Homo sapiens PERB11.2                 | 0.000828   | 0.00137151 | 1.26284633 |
| C4orf34     | NM_174921.1 C4ORF34     |   | 4 Homo sapiens FLJ13289                 | 2.4671E-06 | 1.3135E-05 | 1.26246935 |
| CERK        | NM_182661.1 CERK        |   | 22 Homo sapiens KIAA1646; dA            | 2.9415E-05 | 8.8751E-05 | 1.26217274 |
| FAM173A     | NM_023933.1 FAM173A     |   | 16 Homo sapiens MGC2494                 | 3.748E-05  | 0.00010835 | 1.26153651 |
| SND1        | NM_014390.2 SND1        |   | 7 Homo sapiens TDRD11; p10C             | 3.3229E-05 | 9.8E-05    | 1.26077457 |
| LRP5L       | NM_182492.1 LRP5L       |   | 22 Homo sapiens DKFZp434O02             | 0.03385479 | 0.03201573 | 1.26024623 |
| SLC26A6     | NM_134426.2 SLC26A6     |   | 3 Homo sapiens DKFZp586E14              | 5.9233E-05 | 0.00015583 | 1.26001228 |
| DKFZp434K19 | NM_00102995 DKFZP434K19 |   | 22 Homo sapiens hypothetical p          | 0.03930181 | 0.03631361 | 1.2599237  |
| LOC653506   | XM_927769.1 LOC653506   |   | 17 PREDICTED: Homo sapiens s            | 1.4436E-06 | 8.808E-06  | 1.25962328 |
| R3HCC1      | XM_114618.6 R3HCC1      |   | PREDICTED: Homo sapiens R               | 1.7568E-05 | 5.963E-05  | 1.25955191 |
| RHBDD2      | NM_00104045 RHBDD2      |   | 7 Homo sapiens NPD007; RHB              | 4.7952E-07 | 3.9579E-06 | 1.25953147 |
| NCOA7       | NM_181782.2 NCOA7       |   | 6 Homo sapiens FLJ45605; dJ1            | 0.0115557  | 0.01296213 | 1.25938088 |
| FAM102B     | NM_00101088 FAM102B     |   | 1 Homo sapiens DKFZp686N01              | 0.0287853  | 0.02799715 | 1.25932611 |
| SENP2       | NM_021627.2 SENP2       |   | 3 Homo sapiens AXAM2; SMT3              | 0.00053664 | 0.00095565 | 1.2590913  |
| RNF114      | NM_018683.3 RNF114      |   | 20 Homo sapiens RNF114                  | 1.2613E-06 | 7.933E-06  | 1.25902058 |
| SSR2        | NM_003145.2 SSR2        |   | 1 Homo sapiens SSR2; DKFZ               | 3.7491E-05 | 0.00010835 | 1.25895712 |
| COQ3        | NM_017421.2 COQ3        |   | 6 Homo sapiens bA9819.1; UG             | 4.8057E-05 | 0.00013218 | 1.25867733 |
| MFAP3       | NM_005927.3 MFAP3       |   | 5 Homo sapiens microfibrillar- $\alpha$ | 0.01858439 | 0.01934046 | 1.25867045 |
| SHROOM4     | NM_020717.2 SHROOM4     | X | Homo sapiens KIAA1202                   | 0.00132365 | 0.00204143 | 1.25858662 |
| MIF4GD      | NM_020679.2 MIF4GD      |   | 17 Homo sapiens SLIP1; MIFD;            | 0.00015126 | 0.0033429  | 1.25844602 |
| PPP1R2      | NM_006241.3 PPP1R2      |   | 3 Homo sapiens MGC87148; IF             | 1.0689E-05 | 4.0045E-05 | 1.25808305 |
| TMEM41B     | NM_015012.1 TMEM41B     |   | 11 Homo sapiens MGC33897; K             | 5.8715E-07 | 4.5671E-06 | 1.25806274 |
| GAK         | NM_005255.1 GAK         |   | 4 Homo sapiens MGC99654; FL             | 0.00041412 | 0.00077031 | 1.25795984 |
| ALG13       | NM_018466.2 ALG13       | X | Homo sapiens YGL047W; GL                | 0.00027045 | 0.00053795 | 1.25791145 |
| YY1AP1      | NM_139121.1 YY1AP1      |   | 1 Homo sapiens HCCA2; FLJ10             | 0.00066756 | 0.00114153 | 1.25787538 |
| RAB5C       | NM_201434.1 RAB5C       |   | 17 Homo sapiens RAB5CL; RABL            | 0.00052852 | 0.00094309 | 1.25751742 |
| ATP6V1B2    | NM_001693.2 ATP6V1B2    |   | 8 Homo sapiens VATB; VPP3; A            | 1.1245E-07 | 1.504E-06  | 1.2572427  |
| RYBP        | NM_012234.3 RYBP        |   | 3 Homo sapiens DEDAF; YEAF1             | 8.4825E-05 | 0.00021006 | 1.25709071 |
| TSC22D2     | NM_014779.2 TSC22D2     |   | 3 Homo sapiens KIAA0669; TIL            | 0.00072358 | 0.00122231 | 1.25619635 |
| ACADVL      | NM_000018.2 ACADVL      |   | 17 Homo sapiens ACAD6; VLCAI            | 3.0151E-06 | 1.5221E-05 | 1.2561946  |
| PQLC1       | NM_025078.3 PQLC1       |   | 18 Homo sapiens FLJ22378                | 7.1691E-07 | 5.2593E-06 | 1.25547664 |
| PLDN        | NM_012388.2 PLDN        |   | 15 Homo sapiens PA; PALLID              | 0.0002146  | 0.0004445  | 1.25527067 |
| TNNI3       | NM_000363.3 TNNI3       |   | 19 Homo sapiens CMH7; cTnI; T           | 0.04701796 | 0.04215999 | 1.25521852 |
| TRAPPC5     | NM_00104246 TRAPPC5     |   | 19 Homo sapiens MGC52424                | 2.7404E-05 | 8.4161E-05 | 1.25501967 |
| TMEM199     | NM_152464.1 TMEM199     |   | 17 Homo sapiens MGC45714; C             | 0.02808312 | 0.02747561 | 1.25500712 |
| DDX19A      | NM_018332.3 DDX19A      |   | 16 Homo sapiens DDX19L; FLJ1            | 0.00131659 | 0.00203197 | 1.25481168 |
| SEPX1       | NM_016332.2 SEPX1       |   | 16 Homo sapiens MSRB1; SELR;            | 1.381E-05  | 4.9077E-05 | 1.25476921 |
| SECISBP2    | NM_024077.2 SECISBP2    |   | 9 Homo sapiens DKFZp686C09              | 0.00077231 | 0.00129318 | 1.25475385 |
| SLC25A13    | NM_014251.1 SLC25A13    |   | 7 Homo sapiens CTLN2; ARALA             | 0.00956199 | 0.01104924 | 1.25454759 |
| CTSB        | NM_001908.3 CTSB        |   | 8 Homo sapiens CPSB; APPS               | 0.00182211 | 0.00267612 | 1.25454165 |
| SURF1       | NM_003172.2 SURF1       |   | 9 Homo sapiens surf1 (SUR               | 8.9911E-05 | 0.00022005 | 1.25430276 |
| NDFIP2      | NM_019080.1 NDFIP2      |   | 13 Homo sapiens FLJ25842; N4            | 7.108E-07  | 5.2233E-06 | 1.25399026 |
| DENND5A     | NM_015213.2 DENND5A     |   | 11 Homo sapiens FLJ33829; FLJ           | 4.7278E-05 | 0.00013053 | 1.25393965 |
| DEM1        | NM_022774.1 DEM1        |   | 1 Homo sapiens FLJ21144; FLJ            | 0.0064241  | 0.00787551 | 1.25366265 |
| NAT15       | NM_024845.1 NAT15       |   | 16 Homo sapiens FLJ11693                | 0.04609149 | 0.04147761 | 1.2536263  |
| C9orf46     | NM_018465.1 C9ORF46     |   | 9 Homo sapiens FLJ39176; FLJ            | 9.0813E-05 | 0.00022164 | 1.25359542 |
| YIF1A       | NM_020470.1 YIF1A       |   | 11 Homo sapiens FinGER7; 54TI           | 6.1366E-05 | 0.00016039 | 1.25331802 |
| STUB1       | NM_005861.2 STUB1       |   | 16 Homo sapiens CHIP; SDCCA             | 4.7086E-06 | 2.1439E-05 | 1.25317478 |
| ANAPC11     | XM_942695.1 ANAPC11     |   | PREDICTED: Homo sapiens A               | 0.00035614 | 0.00067797 | 1.25281906 |
| OGFR        | NM_007346.2 OGFR        |   | 20 Homo sapiens opioid growth           | 0.00060077 | 0.00104814 | 1.2527879  |
| PPIC        | NM_000943.4 PPIC        |   | 5 Homo sapiens MGC3673; CYI             | 0.00014439 | 0.00032163 | 1.25238831 |
| HES6        | NM_018645.3 HES6        |   | 2 Homo sapiens hairy and enh;           | 7.9887E-07 | 5.7033E-06 | 1.25236873 |
| CCND3       | NM_001760.2 CCND3       |   | 6 Homo sapiens cyclin D3 (CCN           | 5.1887E-07 | 4.2076E-06 | 1.25236087 |
| MTIF3       | NM_152912.3 MTIF3       |   | 13 Homo sapiens IF-3mt; IF3(m           | 5.4486E-05 | 0.00014642 | 1.25215383 |
| CANT1       | NM_138793.2 CANT1       |   | 17 Homo sapiens SHAPY; SCAN-            | 3.5912E-06 | 1.7447E-05 | 1.2520259  |
| C9orf69     | NM_152833.2 C9ORF69     |   | 9 Homo sapiens bA83N9.1                 | 0.00504702 | 0.00640014 | 1.25198396 |
| MLXIPL      | NM_032994.1 MLXIPL      |   | 7 Homo sapiens WS-bHLH; MI              | 0.00050256 | 0.00090376 | 1.25185141 |
| BIRC3       | NM_182962.1 BIRC3       |   | 11 Homo sapiens RNF49; MALT2            | 0.01355457 | 0.01481044 | 1.25155909 |
| C16orf57    | NM_024598.2 C16ORF57    |   | 16 Homo sapiens FLJ13154                | 3.5937E-06 | 1.7449E-05 | 1.25124283 |
| GOLGA3      | NM_005895.2 GOLGA3      |   | 12 Homo sapiens GCP170; MEA-            | 6.3637E-07 | 4.8468E-06 | 1.25106843 |
| IL10RB      | NM_000628.3 IL10RB      |   | 21 Homo sapiens IL-10R2; CRF2           | 0.00118492 | 0.00185884 | 1.25106233 |
| LIMA1       | NM_016357.3 LIMA1       |   | 12 Homo sapiens SREBP3; EPLI            | 0.00042413 | 0.00078574 | 1.25089004 |
| STAT1       | NM_139266.1 STAT1       |   | 2 Homo sapiens ISGF-3; STAT             | 4.9078E-05 | 0.00013448 | 1.25078606 |
| FRMD8       | NM_031904.3 FRMD8       |   | 11 Homo sapiens MGC31785; FI            | 0.00161359 | 0.00241227 | 1.25045016 |
| PAFAH1B1    | NM_000430.2 PAFAH1B1    |   | 17 Homo sapiens LIS2; PAFAH;            | 3.9419E-06 | 1.8766E-05 | 1.25033496 |
| EIF4E3      | NM_173359.3 EIF4E3      |   | 3 Homo sapiens MGC86971; M              | 0.03601061 | 0.0337561  | 1.24933431 |
| NDRG3       | NM_022477.2 NDRG3       |   | 20 Homo sapiens FLJ13556                | 7.3461E-05 | 0.00018618 | 1.24902908 |
| DFFA        | NM_004401.2 DFFA        |   | 1 Homo sapiens DFF-45; ICAD             | 0.00017353 | 0.00037446 | 1.24887274 |
| CTSL2       | NM_001333.2 CTSL2       |   | 9 Homo sapiens CTSV; CATL2;             | 2.1801E-06 | 1.1933E-05 | 1.24878735 |
| CCNH        | NM_001239.2 CCNH        |   | 5 Homo sapiens p34; CAK; p3;            | 0.0028189  | 0.00386695 | 1.24871407 |

## 5.0 Upreg

|             |             |             |    |                               |            |            |            |
|-------------|-------------|-------------|----|-------------------------------|------------|------------|------------|
| LOC648980   | XM_941280.2 | LOC648980   | 22 | PREDICTED: Homo sapiens s     | 0.00625749 | 0.00771546 | 1.24824116 |
| GMPPA       | NM_013335.2 | GMPPA       | 2  | Homo sapiens GDP-mannose      | 4.5947E-05 | 0.00012754 | 1.24803558 |
| PJA2        | NM_014819.2 | PJA2        |    | Homo sapiens KIAA0438; RN     | 2.0177E-06 | 1.1298E-05 | 1.24793128 |
| C7orf26     | NM_024067.2 | C7ORF26     | 7  | Homo sapiens MGC2718          | 3.0556E-05 | 9.1438E-05 | 1.247874   |
| INO80C      | NM_194281.2 | INO80C      | 18 | Homo sapiens hIes6; FLJ381    | 0.00151158 | 0.00228155 | 1.24780248 |
| BIRC2       | NM_001166.3 | BIRC2       | 11 | Homo sapiens API1; Hiap-2;    | 0.00049248 | 0.00088946 | 1.24768052 |
| CREB3L2     | NM_194071.2 | CREB3L2     | 7  | Homo sapiens MGC131709; I     | 4.7562E-05 | 0.00013098 | 1.24755123 |
| LMO4        | NM_006769.2 | LMO4        | 1  | Homo sapiens LIM domain or    | 7.6373E-06 | 3.0739E-05 | 1.24752685 |
| LHX2        | NM_004789.3 | LHX2        | 9  | Homo sapiens LH2; hLhx2; N    | 0.00026434 | 0.00052953 | 1.24749839 |
| ATP6V0B     | NM_004047.2 | ATP6V0B     | 1  | Homo sapiens HATPL; ATP6F,    | 1.0274E-06 | 6.8397E-06 | 1.24736619 |
| PAC SIN2    | NM_007229.2 | PAC SIN2    | 22 | Homo sapiens SDPII            | 2.8966E-06 | 1.481E-05  | 1.24712679 |
| RAB8B       | NM_016530.2 | RAB8B       | 15 | Homo sapiens FLJ38125         | 0.00696385 | 0.00842073 | 1.2470924  |
| EGR1        | NM_001964.2 | EGR1        | 5  | Homo sapiens GOS30; AT225     | 4.7935E-07 | 3.9603E-06 | 1.24701402 |
| C1orf115    | NM_024709.2 | C1ORF115    | 1  | Homo sapiens FLJ14146; RP:    | 0.00021192 | 0.00043988 | 1.24695403 |
| LMOD3       | NM_198271.2 | LMOD3       | 3  | Homo sapiens DKFZp313F01      | 0.00213683 | 0.0030675  | 1.24679721 |
| RWDD2A      | NM_033411.2 | RWDD2A      | 6  | Homo sapiens DJ747H23.2; F    | 0.00255277 | 0.00355694 | 1.2465134  |
| ALCAM       | NM_001627.2 | ALCAM       | 3  | Homo sapiens CD166; FLJ38     | 6.0443E-06 | 2.5769E-05 | 1.24640867 |
| MED19       | NM_153450.1 | MED19       | 11 | Homo sapiens LCMR1            | 0.00119493 | 0.00187286 | 1.24624018 |
| C21orf58    | NM_199071.2 | C21ORF58    | 21 | Homo sapiens chromosome 2     | 0.00038649 | 0.00072691 | 1.24602346 |
| LOC10013178 | XR_039574.1 | LOC10013178 | 7  | PREDICTED: Homo sapiens n     | 0.00156797 | 0.00235249 | 1.24588975 |
| RUNX3       | NM_004350.1 | RUNX3       | 1  | Homo sapiens FLJ34510; MG     | 0.00215956 | 0.00309405 | 1.24532427 |
| SLC16A10    | NM_018593.3 | SLC16A10    | 6  | Homo sapiens TAT1; PRO081     | 0.02017144 | 0.02077036 | 1.24530875 |
| ACAD11      | NM_032169.3 | ACAD11      | 3  | Homo sapiens FLJ12592; MG     | 0.0020266  | 0.00292842 | 1.24509755 |
| POP7        | NM_005837.1 | POP7        | 7  | Homo sapiens O610037N12R      | 0.00383285 | 0.00505629 | 1.24449936 |
| F11R        | NM_016946.3 | F11R        | 1  | Homo sapiens JAM; JAM-A; F    | 0.00019777 | 0.00041603 | 1.244442   |
| ZBTB9       | NM_152735.3 | ZBTB9       | 6  | Homo sapiens MGC23166         | 0.00043663 | 0.00080449 | 1.24421066 |
| MOBK L3     | NM_199482.2 | MOBK L3     | 2  | Homo sapiens 2C4D; MGC12      | 0.00129191 | 0.00200021 | 1.24376055 |
| NARF        | NM_00103861 | NARF        | 17 | Homo sapiens FLJ10067; DK     | 0.00016237 | 0.00035484 | 1.24315463 |
| FAM120B     | NM_032448.1 | FAM120B     | 6  | Homo sapiens KIAA1838; dJ     | 1.1324E-06 | 7.3543E-06 | 1.24293145 |
| LOC647346   | XM_942836.1 | LOC647346   |    | PREDICTED: Homo sapiens s     | 0.0040014  | 0.00525416 | 1.24287999 |
| SCOC        | NM_032547.1 | SCOC        | 4  | Homo sapiens HRHFB2072;       | 0.00019073 | 0.00040481 | 1.24282107 |
| SLC30A3     | NM_003459.4 | SLC30A3     | 2  | Homo sapiens ZNT3             | 2.6105E-05 | 8.082E-05  | 1.24273284 |
| SKP1        | NM_006930.3 | SKP1        | 5  | Homo sapiens TCEB1L; MGC:     | 0.00742707 | 0.00890234 | 1.24226528 |
| WDR33       | NM_00100662 | WDR33       | 2  | Homo sapiens WDC146; FLJ1     | 0.001301   | 0.00201358 | 1.24218484 |
| HNRNPU      | NM_031844.2 | HNRNPU      | 1  | Homo sapiens SAF-A; U21.1;    | 0.00573772 | 0.00715197 | 1.24205215 |
| CCNC        | NM_00101339 | CCNC        | 6  | Homo sapiens CyoC             | 2.7871E-05 | 8.5206E-05 | 1.24110245 |
| LOC389293   | XM_371741.4 | LOC389293   | 5  | PREDICTED: Homo sapiens s     | 0.00556756 | 0.00696958 | 1.24069408 |
| ZNF394      | NM_032164.2 | ZNF394      | 7  | Homo sapiens FLJ12298; ZK:    | 0.00070773 | 0.00119854 | 1.24052162 |
| MFSD3       | NM_138431.1 | MFSD3       | 8  | Homo sapiens major facilitat  | 1.8356E-06 | 1.0554E-05 | 1.24006366 |
| MUM1        | NM_032853.2 | MUM1        | 19 | Homo sapiens MGC163315; I     | 1.2654E-05 | 4.586E-05  | 1.24005763 |
| PREP        | NM_002726.3 | PREP        | 6  | Homo sapiens PEP; PE; MGC:    | 0.00019387 | 0.00041018 | 1.24002385 |
| CCDC93      | NM_019044.3 | CCDC93      | 2  | Homo sapiens FLJ10996; FLJ    | 0.00010671 | 0.00025277 | 1.23982247 |
| PPHLN1      | NM_201438.1 | PPHLN1      | 12 | Homo sapiens HSPC206; HSF     | 0.00057864 | 0.00101744 | 1.23970905 |
| TMEM185B    | NR_000034.1 | TMEM185B    | 2  | Homo sapiens FLJ20979; FAI    | 0.00353039 | 0.00470754 | 1.23935761 |
| FAM53C      | NM_016605.1 | FAM53C      | 5  | Homo sapiens C5orf6           | 1.5435E-05 | 5.3763E-05 | 1.23927721 |
| RGMA        | NM_020211.1 | RGMA        | 15 | Homo sapiens RGM              | 0.03778    | 0.03514437 | 1.23893064 |
| GUSB        | NM_000181.1 | GUSB        | 7  | Homo sapiens MPS7; FLJ394     | 6.1452E-05 | 0.00016052 | 1.23869124 |
|             | Hs.436379   | HS.436379   | 2  | full-length cDNA clone CS0DI  | 0.00146481 | 0.00222472 | 1.23842209 |
| WRB         | NM_004627.2 | WRB         | 21 | Homo sapiens CHD5             | 0.00046009 | 0.00083839 | 1.23840319 |
| C20orf111   | NM_016470.6 | C20ORF111   | 20 | Homo sapiens DJ1183I21.1;     | 1.0794E-05 | 4.0386E-05 | 1.2382622  |
| STOX2       | NM_020225.1 | STOX2       | 4  | Homo sapiens DKFZp762K22      | 0.01936744 | 0.020046   | 1.23820022 |
| RTN4R       | NM_023004.5 | RTN4R       | 22 | Homo sapiens NOGOR; NGR       | 0.03065227 | 0.0294926  | 1.23818409 |
| C18orf8     | NM_013326.2 | C18ORF8     | 18 | Homo sapiens HsT2591; MIC     | 2.2201E-06 | 1.2106E-05 | 1.23807901 |
| C14orf2     | NM_004894.1 | C14ORF2     | 14 | Homo sapiens ZLPM; MP68       | 2.893E-05  | 8.765E-05  | 1.23803291 |
| IMPAD1      | NM_017813.2 | IMPAD1      | 8  | Homo sapiens IMPA3; FLJ204    | 0.00322818 | 0.00435286 | 1.23796125 |
| FGFR3       | NM_000142.2 | FGFR3       | 4  | Homo sapiens HSFGR3EX; J      | 2.6865E-05 | 8.2736E-05 | 1.23778844 |
| IFI27L1     | NM_145249.2 | IFI27L1     | 14 | Homo sapiens interferon, alp  | 9.8314E-05 | 0.00023659 | 1.23749739 |
| FLOT1       | NM_005803.2 | FLOT1       | 6  | Homo sapiens flotillin 1 (FLO | 5.5781E-05 | 0.00014912 | 1.23744902 |
| KIAA1826    | NM_032424.1 | KIAA1826    | 11 | Homo sapiens KIAA1826 (KI     | 0.00074523 | 0.00125406 | 1.23735675 |
| LCMT1       | NM_00103239 | LCMT1       | 16 | Homo sapiens LCMT; PPMT1;     | 6.801E-06  | 2.8267E-05 | 1.23735207 |
| NARS2       | NM_024678.3 | NARS2       | 11 | Homo sapiens SLM5; FLJ234     | 0.01946741 | 0.02013522 | 1.23723882 |
| ZNHIT1      | NM_006349.2 | ZNHIT1      | 7  | Homo sapiens ZNFN4A1; CG:     | 1.4873E-06 | 9.0061E-06 | 1.23711269 |
| MARS2       | NM_138395.2 | MARS2       | 2  | Homo sapiens mtMetRS; Met     | 0.03957814 | 0.03652662 | 1.23694328 |
| SNAPC4      | NM_003086.1 | SNAPC4      | 9  | Homo sapiens SNAP190; FLJ     | 7.8688E-06 | 3.1526E-05 | 1.23693094 |
| SLC12A2     | NM_001046.2 | SLC12A2     | 5  | Homo sapiens NKCC1; BSC2,     | 0.00184556 | 0.00270378 | 1.23542886 |
| LOC648638   | XM_937706.1 | LOC648638   |    | PREDICTED: Homo sapiens s     | 5.7476E-06 | 2.4757E-05 | 1.23506088 |
| IL17RD      | NM_017563.1 | IL17RD      | 3  | Homo sapiens DKFZp434N19      | 0.00049572 | 0.0008942  | 1.23491786 |
| LLPH        | NM_032338.3 | LLPH        | 12 | Homo sapiens LLP homolog,     | 4.3185E-06 | 2.009E-05  | 1.2348355  |
| FBXO2       | NM_183412.2 | FBXO2       | 1  | Homo sapiens Fbs1; FBG1; F    | 0.00026759 | 0.00053397 | 1.23452989 |
| CORO1B      | NM_020441.2 | CORO1B      | 11 | Homo sapiens CORONIN-2; I     | 0.00134499 | 0.0020689  | 1.2343356  |

5.0 Upreg

|             |             |             |    |                           |                  |            |            |            |
|-------------|-------------|-------------|----|---------------------------|------------------|------------|------------|------------|
| PLRG1       | NM_002669.2 | PLRG1       | 4  | Homo sapiens              | MGC110980; I     | 1.6523E-06 | 9.7889E-06 | 1.23416817 |
| DPM1        | NM_003859.1 | DPM1        | 20 | Homo sapiens              | MPDS; CDGIE      | 4.4818E-07 | 3.7884E-06 | 1.23404426 |
| OCRL        | NM_001587.3 | OCRL        |    | Homo sapiens              | NPHL2; OCRL1     | 0.00014588 | 0.00032438 | 1.23381964 |
| METTL11A    | NM_014064.2 | METTL11A    | 9  | Homo sapiens              | AD-003           | 0.00198381 | 0.00287512 | 1.233632   |
| TMEM106A    | NM_145041.1 | TMEM106A    | 17 | Homo sapiens              | MGC20235         | 0.00333201 | 0.00447635 | 1.23359219 |
| ENO2        | NM_001975.2 | ENO2        | 12 | Homo sapiens              | NSE              | 4.0895E-06 | 1.9322E-05 | 1.23333813 |
| TMEM60      | NM_032936.2 | TMEM60      | 7  | Homo sapiens              | MGC74482; C      | 9.3487E-06 | 3.596E-05  | 1.23330847 |
| FAM175A     | NM_139076.2 | FAM175A     | 4  | Homo sapiens              | ABRA1; FLJ13     | 0.0006835  | 0.00116515 | 1.23305713 |
| HDAC3       | NM_003883.2 | HDAC3       | 5  | Homo sapiens              | RPD3; HD3; R     | 2.7399E-06 | 1.42E-05   | 1.23287437 |
| BLVRA       | NM_000712.3 | BLVRA       | 7  | Homo sapiens              | BVRA; BLVR       | 6.8656E-06 | 2.8428E-05 | 1.2328022  |
| RP11-529I10 | NM_015448.1 | RP11-529I10 | 10 | Homo sapiens              | DKFZP566F08      | 0.00012796 | 0.00029222 | 1.23260654 |
| TMED7       | NM_181836.3 | TMED7       | 5  | Homo sapiens              | FLJ90481; CG     | 0.00017983 | 0.00038446 | 1.23231955 |
| REEP6       | NM_138393.1 | REEP6       | 19 | Homo sapiens              | FLJ25383; DP     | 9.8114E-05 | 0.00023624 | 1.23122681 |
| KATNA1      | NM_007044.2 | KATNA1      | 6  | Homo sapiens              | katanin p60 (f   | 0.00123327 | 0.00192334 | 1.23113925 |
| LOC728014   | XM_946270.1 | LOC728014   | 12 | PREDICTED: Homo sapiens s |                  | 0.00013301 | 0.00030102 | 1.23090688 |
| DCTN5       | NM_032486.2 | DCTN5       | 16 | Homo sapiens              | MGC3248; p2!     | 0.000311   | 0.00060558 | 1.23088276 |
| ACTR10      | NM_018477.1 | ACTR10      | 14 | Homo sapiens              | HARP11; ACTF     | 3.6811E-05 | 0.00010684 | 1.23049126 |
| SCYL2       | NM_017988.4 | SCYL2       | 12 | Homo sapiens              | KIAA1360; CV     | 0.00045222 | 0.00082559 | 1.23042944 |
| GRIPAP1     | NM_020137.3 | GRIPAP1     |    | Homo sapiens              | DKFZp434P06      | 0.01550564 | 0.01659103 | 1.22942413 |
| MCL1        | NM_021960.3 | MCL1        | 1  | Homo sapiens              | MCL1L; MGC1      | 0.00030603 | 0.00059802 | 1.22931569 |
| CDK6        | NM_001259.5 | CDK6        | 7  | Homo sapiens              | PLSTIRE; MGC     | 0.00010249 | 0.00024462 | 1.22929968 |
| ROBO3       | NM_022370.2 | ROBO3       | 11 | Homo sapiens              | HGPS; HGPPS      | 0.00172918 | 0.00256021 | 1.22896025 |
| C22orf28    | NM_014306.2 | C22ORF28    | 22 | Homo sapiens              | HSPC117; RP1     | 4.7171E-05 | 0.00013027 | 1.2287417  |
| MKRN2       | NM_014160.3 | MKRN2       | 3  | Homo sapiens              | HSPC070; RNF     | 0.00011608 | 0.0002698  | 1.22852123 |
| TMCO1       | NM_019026.2 | TMCO1       | 1  | Homo sapiens              | HP10122; TMC     | 2.919E-07  | 2.83E-06   | 1.22818797 |
| LOC647037   | XM_930029.1 | LOC647037   | 15 | PREDICTED: Homo sapiens s |                  | 0.00012462 | 0.00028579 | 1.2280497  |
| BSCL2       | NM_032667.4 | BSCL2       | 11 | Homo sapiens              | SPG17; MGC4      | 1.2362E-05 | 4.5063E-05 | 1.22775904 |
| TM2D1       | NM_032027.2 | TM2D1       | 1  | Homo sapiens              | BBP              | 7.9986E-05 | 0.00019971 | 1.2277387  |
| WDR54       | NM_032118.2 | WDR54       | 2  | Homo sapiens              | FLJ12953         | 8.7131E-06 | 3.4068E-05 | 1.22767433 |
| RNF182      | NM_152737.2 | RNF182      | 6  | Homo sapiens              | FLJ40772; MG     | 0.04632754 | 0.04165159 | 1.22750098 |
| RAP2A       | NM_021033.4 | RAP2A       | 13 | Homo sapiens              | RAP2; K-REV;     | 7.3957E-05 | 0.00018716 | 1.22683204 |
| ZNF526      | NM_133444.1 | ZNF526      | 19 | Homo sapiens              | KIAA1951; MC     | 0.00258051 | 0.00358932 | 1.22592089 |
| FUCA1       | NM_000147.2 | FUCA1       | 1  | Homo sapiens              | fucosidase, al   | 3.6124E-05 | 0.00010537 | 1.22554337 |
| LMF2        | NM_033200.1 | LMF2        | 22 | Homo sapiens              | TMEM153; TM      | 0.00317793 | 0.00429633 | 1.22527862 |
| ASNSD1      | NM_019048.1 | ASNSD1      | 2  | Homo sapiens              | NBLA00058; N     | 1.6268E-06 | 9.6702E-06 | 1.22515978 |
| PNPLA6      | NM_006702.2 | PNPLA6      | 19 | Homo sapiens              | sws; NTE         | 2.0578E-05 | 6.7471E-05 | 1.22496985 |
| PGS1        | NM_024419.3 | PGS1        | 17 | Homo sapiens              | DKFZP762M18      | 3.965E-05  | 0.00011295 | 1.22492223 |
| LOC728006   | NM_145039.2 | LOC728006   | 16 | PREDICTED: Homo sapiens h |                  | 0.04840835 | 0.04319924 | 1.22482641 |
| GGH         | NM_003878.1 | GGH         | 8  | Homo sapiens              | GH               | 9.4029E-06 | 3.6137E-05 | 1.22471453 |
| MFAP1       | NM_005926.2 | MFAP1       | 15 | Homo sapiens              | microfibrillar-a | 0.00031517 | 0.00061207 | 1.22451937 |
| MMD         | NM_012329.2 | MMD         | 17 | Homo sapiens              | PAQR11; MMA      | 5.6726E-06 | 2.4542E-05 | 1.22419106 |
| LOC389765   | XM_00172064 | LOC389765   |    | PREDICTED: Homo sapiens s |                  | 0.00235935 | 0.00333455 | 1.22402328 |
| H1FO        | NM_005318.2 | H1FO        | 22 | Homo sapiens              | H1FV; MGC52      | 2.4912E-07 | 2.5124E-06 | 1.22365185 |
| SNHG9       | NR_003142.2 | SNHG9       | 16 | Homo sapiens              | DKFZp686N06      | 4.0185E-07 | 3.4944E-06 | 1.22354374 |
| BRD7        | NM_013263.2 | BRD7        | 16 | Homo sapiens              | CELTX1; NAG      | 4.0665E-05 | 0.00011539 | 1.22349878 |
| C20orf4     | NM_015511.2 | C20ORF4     | 20 | Homo sapiens              | bA234K24.2; (    | 0.00040738 | 0.00076001 | 1.22322792 |
| ALDOC       | NM_005165.2 | ALDOC       | 17 | Homo sapiens              | ALDC             | 4.2564E-06 | 1.9875E-05 | 1.22315624 |
| GALNT11     | NM_022087.1 | GALNT11     | 7  | Homo sapiens              | FLJ21634; MG     | 0.00019406 | 0.00041049 | 1.22299718 |
| PDCD4       | NM_145341.2 | PDCD4       | 10 | Homo sapiens              | MGC33046; M      | 0.00258922 | 0.00359972 | 1.22290936 |
| LOC10012921 | XM_00171898 | LOC10012921 | 9  | PREDICTED: Homo sapiens h |                  | 0.00075596 | 0.00127065 | 1.2227646  |
| FLJ36131    | XM_00172236 | FLJ36131    |    | PREDICTED: Homo sapiens h |                  | 0.00010954 | 0.00025766 | 1.22247086 |
| LYPLAL1     | NM_138794.1 | LYPLAL1     | 1  | Homo sapiens              | KIAA1238         | 5.6817E-06 | 2.4569E-05 | 1.22241935 |
| SDCBP       | NM_00100706 | SDCBP       | 8  | Homo sapiens              | MDA-9; SYCL;     | 0.00030943 | 0.00060304 | 1.22223637 |
| ALDH2       | NM_000690.2 | ALDH2       | 12 | Homo sapiens              | ALDM; ALDH-f     | 0.0037594  | 0.00496762 | 1.22218073 |
| MEF2D       | NM_005920.2 | MEF2D       | 1  | Homo sapiens              | DKFZp686I15      | 0.00042582 | 0.00078789 | 1.22206781 |
| RECQL       | NM_032941.1 | RECQL       | 12 | Homo sapiens              | RecQ1; RECQL     | 0.025632   | 0.02547521 | 1.2219121  |
| LOC401098   | XR_017816.1 | LOC401098   |    | PREDICTED: Homo sapiens n |                  | 0.00050548 | 0.00090752 | 1.22177279 |
| TUSC4       | NM_006545.4 | TUSC4       | 3  | Homo sapiens              | NPR2L; NPRL2     | 5.0972E-06 | 2.2656E-05 | 1.22169406 |
| RAB21       | NM_014999.1 | RAB21       | 12 | Homo sapiens              | KIAA0118         | 0.00173661 | 0.00256861 | 1.22165247 |
| IP6K1       | NM_153273.3 | IP6K1       | 3  | Homo sapiens              | PIUS; IP6K1; I   | 0.00247369 | 0.00346602 | 1.22152827 |
| RIMS3       | NM_014747.2 | RIMS3       | 1  | Homo sapiens              | RIM3; NIM3; t    | 0.00736521 | 0.00884148 | 1.22152157 |
| STX6        | NM_005819.4 | STX6        | 1  | Homo sapiens              | syntaxin 6 (ST   | 0.00030894 | 0.00060237 | 1.22144186 |
| LOC648740   | NR_024438.2 | LOC648740   | 1  | Homo sapiens              | ACTB pseudog     | 0.01705436 | 0.01801745 | 1.22133255 |
| USP42       | NM_032172.1 | USP42       | 7  | Homo sapiens              | FLJ12697         | 0.00055013 | 0.00097669 | 1.22128862 |
| COL6A1      | NM_001848.1 | COL6A1      | 21 | Homo sapiens              | OPLL             | 0.00059874 | 0.00104523 | 1.22111103 |
| DDX52       | NM_007010.2 | DDX52       | 17 | Homo sapiens              | ROK1             | 0.00086463 | 0.00142012 | 1.22103069 |
| ACBD3       | NM_022735.3 | ACBD3       | 1  | Homo sapiens              | GOLPH1; PAP7     | 6.9513E-06 | 2.8661E-05 | 1.2210236  |
| ESPN        | NM_031475.1 | ESPN        | 1  | Homo sapiens              | DKFZP434A19      | 0.00421926 | 0.00548766 | 1.22097244 |
| UBR4        | NM_020765.1 | UBR4        | 1  | Homo sapiens              | KIAA1307; FL     | 6.1057E-06 | 2.5942E-05 | 1.22035786 |
| LOC10013360 | XM_00171372 | LOC10013360 |    | PREDICTED: Homo sapiens h |                  | 0.00034974 | 0.00066795 | 1.22002328 |

## 5.0 Upreg

|             |             |              |    |                         |                 |            |            |            |
|-------------|-------------|--------------|----|-------------------------|-----------------|------------|------------|------------|
| UNC45A      | NM_017979.1 | UNC45A       | 15 | Homo sapiens            | FLJ10043; SM    | 0.0022526  | 0.00320901 | 1.21984855 |
| NKD2        | NM_033120.2 | NKD2         | 5  | Homo sapiens            | Naked2          | 3.1354E-05 | 9.3445E-05 | 1.21977647 |
| NECAP1      | NM_015509.2 | NECAP1       | 12 | Homo sapiens            | DKFZP566B18     | 6.909E-06  | 2.8527E-05 | 1.21955864 |
| PEPD        | NM_000285.1 | PEPD         | 19 | Homo sapiens            | PROLIDASE; M    | 5.5457E-06 | 2.4076E-05 | 1.21950049 |
| DMAP1       | NM_019100.3 | DMAP1        | 1  | Homo sapiens            | FLJ11543; KIA   | 9.5156E-05 | 0.00023057 | 1.21946051 |
| HLA-F       | NM_018950.1 | HLA-F        | 6  | Homo sapiens            | HLA-5.4; HLA    | 0.00056898 | 0.00100509 | 1.21941618 |
| UBE1        | NM_153280.1 | UBE1         | X  | Homo sapiens            | UBA1A; A1S9;    | 1.1113E-05 | 4.1332E-05 | 1.21935524 |
| MSX1        | NM_002448.1 | MSX1         | 4  | Homo sapiens            | HOX7; HYD1      | 1.5848E-06 | 9.4659E-06 | 1.21903319 |
| PTGR1       | NM_012212.2 | PTGR1        | 9  | Homo sapiens            | MGC34943        | 4.7097E-05 | 0.00013015 | 1.21883977 |
| TERF2IP     | NM_018975.2 | TERF2IP      | 16 | Homo sapiens            | RAP1; DRIP5     | 3.6293E-05 | 0.00010569 | 1.21817461 |
| UTP6        | NM_018428.2 | UTP6         | 17 | Homo sapiens            | HCA66; C17or    | 2.5223E-06 | 1.3356E-05 | 1.21795576 |
| ARHGEF18    | NM_015318.2 | ARHGEF18     | 19 | Homo sapiens            | KIAA0521; MC    | 1.7024E-05 | 5.8119E-05 | 1.21785116 |
| PPIB        | NM_000942.4 | PPIB         | 15 | Homo sapiens            | MGC14109; M     | 0.00672672 | 0.00818475 | 1.21774778 |
| SELS        | NM_203472.1 | SELS         | 15 | Homo sapiens            | SEPS1; ADO1!    | 5.2425E-05 | 0.00014192 | 1.21764756 |
| C14orf85    | NR_002808.1 | C14ORF85     | 14 | Homo sapiens            | chromosome 1    | 0.00665684 | 0.0081121  | 1.21759404 |
| MRPL14      | NM_032111.2 | MRPL14       | 6  | Homo sapiens            | MGC70566; Rl    | 5.4779E-07 | 4.3654E-06 | 1.21758825 |
| RFC1        | NM_002913.3 | RFC1         | 4  | Homo sapiens            | RECC1; RFC14    | 0.00277857 | 0.00382119 | 1.21726012 |
| LOC10000858 | NR_003286.1 | LOC100008588 |    | Homo sapiens            | 18S ribosomal   | 1.2426E-07 | 1.5893E-06 | 1.21725395 |
| AXIN2       | NM_004655.2 | AXIN2        | 17 | Homo sapiens            | MGC126582; I    | 0.00042518 | 0.00078737 | 1.21671747 |
| RARS        | NM_002887.3 | RARS         | 5  | Homo sapiens            | ArgRS; DALRC    | 4.1264E-07 | 3.5635E-06 | 1.21623369 |
| KLHL8       | NM_020803.3 | KLHL8        | 4  | Homo sapiens            | FLJ46304; KIA   | 8.1399E-05 | 0.00020272 | 1.21594683 |
| MAN2B2      | NM_015274.1 | MAN2B2       | 4  | Homo sapiens            | KIAA0935        | 4.4856E-05 | 0.00012498 | 1.21578867 |
| FLYWCH2     | NM_138439.1 | FLYWCH2      | 16 | Homo sapiens            | FLYWCH family   | 0.02362619 | 0.02380525 | 1.21572238 |
| LOC645895   | XM_928866.1 | LOC645895    | 8  | PREDICTED: Homo sapiens | h               | 0.00033964 | 0.00065236 | 1.21534467 |
| ANKRD57     | NM_023016.2 | ANKRD57      | 2  | Homo sapiens            | C2orf26         | 0.00027    | 0.00053743 | 1.21531356 |
| PRUNE       | NM_021222.1 | PRUNE        | 1  | Homo sapiens            | DRES-17; HTC    | 0.02528338 | 0.02520581 | 1.21511678 |
| RNF126      | NM_194460.1 | RNF126       | 19 | Homo sapiens            | MGC14317; M     | 0.00108084 | 0.00171923 | 1.21511353 |
| PLEKHA1     | NM_021622.3 | PLEKHA1      | 10 | Homo sapiens            | TAPP1           | 2.904E-05  | 8.789E-05  | 1.21508432 |
| LOC730432   | XM_936257.1 | LOC730432    |    | PREDICTED: Homo sapiens | s               | 2.2988E-05 | 7.3478E-05 | 1.21489094 |
| EIF2B2      | NM_014239.2 | EIF2B2       | 14 | Homo sapiens            | EIF-2Bbeta; E   | 8.979E-06  | 3.4875E-05 | 1.21439799 |
| LOC10013253 | XR_038464.1 | LOC100132535 |    | PREDICTED: Homo sapiens | n               | 0.01189015 | 0.01326605 | 1.21430931 |
| TNFRSF10B   | NM_003842.3 | TNFRSF10B    | 8  | Homo sapiens            | KILLER/DR5; T   | 0.0054186  | 0.00680641 | 1.21398831 |
| MRFAP1L1    | NM_203462.1 | MRFAP1L1     | 4  | Homo sapiens            | PP784; MGC96    | 0.00028447 | 0.00056189 | 1.21394698 |
| HSDL2       | NM_032303.2 | HSDL2        | 9  | Homo sapiens            | MGC10940; C     | 0.00243912 | 0.00342852 | 1.21389264 |
| PEX11B      | NM_003846.1 | PEX11B       | 1  | Homo sapiens            | PEX11-BETA      | 1.9808E-05 | 6.5411E-05 | 1.21363097 |
| ATP1B1      | NM_00100178 | ATP1B1       | 1  | Homo sapiens            | MGC1798; ATP    | 5.1083E-06 | 2.2671E-05 | 1.21315494 |
| EIF1B       | NM_005875.1 | EIF1B        | 3  | Homo sapiens            | GC20            | 4.7397E-06 | 2.1525E-05 | 1.21313735 |
| LMAN2L      | NM_030805.1 | LMAN2L       | 2  | Homo sapiens            | MGC11139; V     | 5.5165E-05 | 0.00014784 | 1.21298237 |
| TANC2       | NM_025185.3 | TANC2        | 17 | Homo sapiens            | FLJ11824; KIA   | 0.02326352 | 0.02350192 | 1.21249322 |
| ENC1        | NM_003633.1 | ENC1         | 5  | Homo sapiens            | PIG10; NRBP;    | 0.00636874 | 0.00781419 | 1.21211727 |
| CLSTN1      | NM_00100956 | CLSTN1       | 1  | Homo sapiens            | CLSTN1; PIK3C   | 4.9858E-05 | 0.00013632 | 1.21090431 |
| UBLCP1      | NM_145049.1 | UBLCP1       | 5  | Homo sapiens            | MGC10067; Fl    | 0.00019626 | 0.00041365 | 1.21082093 |
| TUBB4Q      | NM_020040.3 | TUBB4Q       | 4  | Homo sapiens            | tubulin, beta p | 7.8863E-05 | 0.00019719 | 1.21080537 |
| C7orf23     | NM_024315.2 | C7ORF23      | 7  | Homo sapiens            | MM-TRAG; MG     | 0.00656398 | 0.00802123 | 1.21069121 |
| TRAPPC4     | NM_016146.1 | TRAPPC4      | 11 | Homo sapiens            | SBDN; CGI-10    | 6.0971E-05 | 0.00015974 | 1.21061209 |
| MAPRE2      | NM_014268.1 | MAPRE2       | 18 | Homo sapiens            | RP1; EB1; EB2   | 0.00034136 | 0.00065509 | 1.21055754 |
| LOC10012828 | NR_024447.1 | LOC10012828  | 17 | Homo sapiens            | hypothetical p  | 0.00112566 | 0.00177924 | 1.21010494 |
| FRG1        | NM_004477.2 | FRG1         | 4  | Homo sapiens            | FSG1; FRG1A     | 3.9629E-05 | 0.00011293 | 1.21010396 |
| MAP3K7      | NM_145333.1 | MAP3K7       | 6  | Homo sapiens            | TAK1; TGF1a     | 0.00066554 | 0.00113897 | 1.21007488 |
| COPE        | NM_199444.1 | COPE         | 19 | Homo sapiens            | FLJ13241; eps   | 4.5173E-06 | 2.0773E-05 | 1.20986361 |
| C14orf153   | NM_032374.2 | C14ORF153    | 14 | Homo sapiens            | Apop-1; MGC2    | 0.00194482 | 0.00282842 | 1.20969921 |
| PSMD13      | NM_002817.2 | PSMD13       | 11 | Homo sapiens            | HSPC027; p4C    | 0.00499934 | 0.00634977 | 1.20888524 |
| LSR         | NM_205834.2 | LSR          | 19 | Homo sapiens            | MGC48312; LI    | 0.00658962 | 0.00804472 | 1.20877869 |
| EBAG9       | NM_198120.1 | EBAG9        | 8  | Homo sapiens            | PCAS1; EB9; I   | 0.0029347  | 0.00400576 | 1.20871873 |
| TMC6        | NM_007267.5 | TMC6         | 17 | Homo sapiens            | LAK-4P; EVIN1   | 0.00368283 | 0.00487673 | 1.20869467 |
| CDR2L       | NM_014603.1 | CDR2L        | 17 | Homo sapiens            | HUMPPA          | 6.0725E-06 | 2.5852E-05 | 1.20828837 |
| YTHDF1      | NM_017798.2 | YTHDF1       | 20 | Homo sapiens            | C20orf21; FLJ   | 4.1707E-05 | 0.00011782 | 1.20785244 |
| ZDHHC7      | NM_017740.1 | ZDHHC7       | 16 | Homo sapiens            | ZNF370; FLJ1    | 4.16E-06   | 1.955E-05  | 1.20779052 |
| MIPEP       | NM_005932.1 | MIPEP        | 13 | Homo sapiens            | HMIP; MIP       | 0.01116805 | 0.0125933  | 1.20756341 |
| ALKBH3      | NM_139178.1 | ALKBH3       | 11 | Homo sapiens            | MGC118790; I    | 0.00247193 | 0.00346466 | 1.20748881 |
| MAGEB6B     | XM_373340.1 | MAGEB6B      | X  | PREDICTED: Homo sapiens | n               | 0.00021178 | 0.0004399  | 1.20735672 |
| TNFRSF12A   | NM_016639.1 | TNFRSF12A    | 16 | Homo sapiens            | CD266; TWEA     | 1.4382E-05 | 5.084E-05  | 1.20723253 |
| FAM119A     | NM_00112739 | FAM119A      | 2  | Homo sapiens            | family with se  | 0.00086628 | 0.0014223  | 1.20707366 |
| CHD8        | NM_020920.1 | CHD8         | 14 | Homo sapiens            | KIAA1564; DK    | 0.00032117 | 0.00062152 | 1.20703477 |
| KLC1        | NM_005552.3 | KLC1         | 14 | Homo sapiens            | KLC1; KLC; K    | 0.00385084 | 0.00507774 | 1.20656613 |
| PHRF1       | NM_020901.1 | PHRF1        | 11 | Homo sapiens            | PHD and ring I  | 3.0226E-05 | 9.0638E-05 | 1.20606961 |
| LOC374395   | NM_199337.1 | LOC374395    | 11 | Homo sapiens            | similar to RIKF | 4.3366E-07 | 3.7121E-06 | 1.20563021 |
| GLRX        | NM_002064.1 | GLRX         | 5  | Homo sapiens            | GRX; GRX1; M    | 6.3253E-06 | 2.6643E-05 | 1.20540264 |
| VAMP7       | NM_005638.3 | VAMP7        | X  | Homo sapiens            | TI-VAMP; VAM    | 0.00028774 | 0.00056746 | 1.20533723 |
| CHTF18      | NM_022092.1 | CHTF18       | 16 | Homo sapiens            | Ctf18; C321D    | 0.00560063 | 0.00700598 | 1.20525921 |

## 5.0 Upreg

|             |             |             |    |                           |                           |            |            |            |
|-------------|-------------|-------------|----|---------------------------|---------------------------|------------|------------|------------|
| ZMIZ1       | NM_020338.2 | ZMIZ1       | 10 | Homo sapiens              | MIZ; Zimp10;              | 4.5665E-05 | 0.00012691 | 1.20403506 |
| CYFIP2      | NM_00103733 | CYFIP2      | 5  | Homo sapiens              | PIR121                    | 0.00179085 | 0.00263905 | 1.20399889 |
| BLMH        | NM_000386.2 | BLMH        | 17 | Homo sapiens              | BMH; BH                   | 0.01280163 | 0.01411606 | 1.20376234 |
| MRPL40      | NM_003776.2 | MRPL40      | 22 | Homo sapiens              | NLVCF; URIM;              | 0.00021358 | 0.0004428  | 1.20370357 |
| CCDC45      | NM_138363.1 | CCDC45      | 17 | Homo sapiens              | DKFZp667E18               | 0.00068398 | 0.00116529 | 1.20365803 |
| HSPC268     | NM_197964.1 | HSPC268     | 7  | Homo sapiens              | hypothetical p            | 0.00166308 | 0.00247404 | 1.20350034 |
| LOC641992   | XM_935770.1 | LOC641992   |    |                           | PREDICTED: Homo sapiens s | 0.04473689 | 0.04048282 | 1.20347012 |
| GAPVD1      | NM_015635.2 | GAPVD1      | 9  | Homo sapiens              | MGC138848; I              | 0.00012677 | 0.00028987 | 1.20341782 |
| WDR45L      | NM_019613.2 | WDR45L      | 17 | Homo sapiens              | WIPI-3; WIPI3             | 0.00219173 | 0.00313298 | 1.20331744 |
| LOC729843   | NM_012477.2 | LOC729843   | 2  | PREDICTED: Homo sapiens s |                           | 3.2196E-05 | 9.5404E-05 | 1.20231107 |
| SRP54       | NM_003136.2 | SRP54       | 14 | Homo sapiens              | signal recognit           | 4.0957E-06 | 1.9331E-05 | 1.20195407 |
| BMS1P5      | NR_003611.2 | BMS1P5      | 10 | Homo sapiens              | BMS1 pseudoc              | 0.00175581 | 0.00259308 | 1.20193561 |
| CTNBNB1     | NM_030877.3 | CTNBNB1     | 20 | Homo sapiens              | C20orf33; NAF             | 6.4767E-05 | 0.00016763 | 1.20109874 |
| ANKRD13A    | NM_033121.1 | ANKRD13A    | 12 | Homo sapiens              | ANKRD13; NY               | 0.02821437 | 0.02757635 | 1.20086106 |
| LGALS1      | NM_002305.2 | LGALS1      | 22 | Homo sapiens              | DKFZp686E23               | 2.0715E-07 | 2.2085E-06 | 1.20065052 |
| EHD1        | NM_006795.2 | EHD1        | 11 | Homo sapiens              | PAST1; PAST;              | 0.00035489 | 0.00067632 | 1.20046614 |
| PIAS1       | NM_016166.1 | PIAS1       | 15 | Homo sapiens              | MGC141879; I              | 0.00250965 | 0.00350688 | 1.20000229 |
| LOC10013239 | XM_00171645 | LOC10013239 | 17 | PREDICTED: Homo sapiens h |                           | 0.00054812 | 0.00097412 | 1.19937827 |
| APPL2       | NM_018171.2 | APPL2       | 12 | Homo sapiens              | DIP13B; FLJ10             | 0.01550738 | 0.01659088 | 1.19923601 |
| PCMT1       | NM_005389.1 | PCMT1       | 6  | Homo sapiens              | protein-L-isoa            | 1.1231E-07 | 1.5045E-06 | 1.19915066 |
| C12orf47    | NM_016534.2 | C12ORF47    |    |                           | PREDICTED: Homo sapiens c | 7.3729E-05 | 0.00018675 | 1.19910575 |
| LOC124512   | XM_940962.1 | LOC124512   |    |                           | PREDICTED: Homo sapiens h | 2.6815E-06 | 1.4005E-05 | 1.19905195 |
| EFR3A       | NM_015137.1 | EFR3A       | 8  | Homo sapiens              | KIAA0143; DK              | 1.5085E-05 | 5.2733E-05 | 1.19894946 |
| LOC10013258 | XM_00172211 | LOC10013258 | 7  | PREDICTED: Homo sapiens h |                           | 0.00028499 | 0.00056266 | 1.19870553 |
| KATNB1      | NM_005886.1 | KATNB1      | 16 | Homo sapiens              | KAT                       | 0.00027623 | 0.00054723 | 1.19853114 |
| CAND1       | NM_018448.2 | CAND1       | 12 | Homo sapiens              | FLJ90441; FLJ             | 0.01230141 | 0.01365026 | 1.19852618 |
| UBE2L3      | NM_003347.2 | UBE2L3      | 22 | Homo sapiens              | L-UBC; UBCH7              | 0.05646505 | 0.04912    | 1.19851399 |
|             |             | Hs.250648   | 3  | full-length cDNA clone    | CS0D                      | 0.01805577 | 0.01887767 | 1.19843556 |
| NDUFA11     | NM_175614.2 | NDUFA11     | 19 | Homo sapiens              | B14.7                     | 1.3654E-05 | 4.8579E-05 | 1.1983946  |
| SPG7        | NM_199367.1 | SPG7        | 16 | Homo sapiens              | CAR; FLJ3730              | 0.0023509  | 0.00332583 | 1.19834411 |
| RNF4        | NM_002938.2 | RNF4        | 4  | Homo sapiens              | RES4-26; SNU              | 0.00083564 | 0.00138104 | 1.19815662 |
| LOC10012797 | XR_038064.1 | LOC10012797 |    |                           | PREDICTED: Homo sapiens n | 0.00236541 | 0.00334204 | 1.19812165 |
| ADIPOR2     | NM_024551.2 | ADIPOR2     | 12 | Homo sapiens              | MGC4640; AC               | 2.4405E-06 | 1.3025E-05 | 1.19791709 |
| HSF2        | NM_004506.2 | HSF2        | 6  | Homo sapiens              | MGC117376; I              | 0.00993604 | 0.01140785 | 1.1972515  |
| TBC1D2B     | NM_015079.2 | TBC1D2B     | 15 | Homo sapiens              | KIAA1055; FL              | 0.04949188 | 0.04396049 | 1.19679822 |
| LRFN3       | NM_024509.1 | LRFN3       | 19 | Homo sapiens              | FIGLER1; MGC              | 0.00049782 | 0.00089652 | 1.19659282 |
| PTPN1       | NM_002093.2 | PTPN1       | 20 | Homo sapiens              | PTP1B                     | 6.0659E-06 | 2.5836E-05 | 1.19646833 |
| CATSPER2    | NM_172097.1 | CATSPER2    | 15 | Homo sapiens              | MGC33346                  | 0.00111198 | 0.00176078 | 1.19610589 |
| CCDC130     | NM_030818.2 | CCDC130     | 19 | Homo sapiens              | MGC10471                  | 1.2443E-05 | 4.528E-05  | 1.195996   |
| LEPROTL1    | NM_015344.1 | LEPROTL1    | 8  | Homo sapiens              | HSPC112; Vps              | 0.0002473  | 0.00050088 | 1.19589432 |
| GSK3B       | NM_002093.2 | GSK3B       | 3  | Homo sapiens              | glycogen syntl            | 0.00126119 | 0.00195922 | 1.19574899 |
| EIF4E2      | NM_004846.2 | EIF4E2      | 2  | Homo sapiens              | EIF4EL3; 4E-L             | 0.00052987 | 0.00094494 | 1.19566397 |
| TFB1M       | NM_016020.1 | TFB1M       | 6  | Homo sapiens              | CGI75; mtTFB              | 0.00022445 | 0.00046142 | 1.19558114 |
| LOC10013464 | XM_00172468 | LOC10013464 | 7  | PREDICTED: Homo sapiens s |                           | 0.00170777 | 0.00253279 | 1.19552062 |
| ABR         | NM_001092.3 | ABR         | 17 | Homo sapiens              | MDB; FLJ4595              | 0.00424295 | 0.00551276 | 1.19546553 |
| PPM1H       | XM_939302.1 | PPM1H       | 12 | Homo sapiens              | KIAA1157; FL              | 0.01836396 | 0.01914058 | 1.19544193 |
| GABARAPL2   | NM_007285.6 | GABARAPL2   | 16 | Homo sapiens              | GEF2; GATE1E              | 1.922E-05  | 6.4023E-05 | 1.19455921 |
| CXXC1       | NM_014593.2 | CXXC1       | 18 | Homo sapiens              | SPP1; HsT264              | 1.3494E-05 | 4.8167E-05 | 1.1944774  |
| AP4B1       | NM_006594.1 | AP4B1       | 1  | Homo sapiens              | BETA-4                    | 0.00103304 | 0.00165219 | 1.19440113 |
| GNA11       | NM_002067.1 | GNA11       | 19 | Homo sapiens              | GNA-11                    | 0.00015894 | 0.00034882 | 1.19429568 |
| SPG11       | NM_025137.2 | SPG11       | 15 | Homo sapiens              | KIAA1840; DK              | 0.00136223 | 0.00209211 | 1.19429246 |
| UBL5        | NM_00104824 | UBL5        | 19 | Homo sapiens              | HUB1; MGC13               | 3.9951E-06 | 1.8938E-05 | 1.19403547 |
| LOC729120   | XM_00113302 | LOC729120   |    |                           | PREDICTED: Homo sapiens h | 0.00658752 | 0.00804327 | 1.1939057  |
| C19orf60    | NM_00110041 | C19ORF60    | 19 | Homo sapiens              | FLJ20850; FLJ             | 5.2716E-05 | 0.00014249 | 1.19375102 |
| LOC10012850 | XM_00172323 | LOC10012850 |    |                           | PREDICTED: Homo sapiens s | 0.00053113 | 0.0009468  | 1.1937143  |
| NPLOC4      | NM_017921.1 | NPLOC4      | 17 | Homo sapiens              | FLJ20657; FLJ             | 0.00017581 | 0.00037808 | 1.19357198 |
| PRDX1       | NM_181696.1 | PRDX1       | 1  | Homo sapiens              | MSP23; PAG; I             | 1.3158E-07 | 1.654E-06  | 1.19354191 |
| FAM98A      | NM_015475.3 | FAM98A      | 2  | Homo sapiens              | DKFZp686O03               | 2.614E-06  | 1.3734E-05 | 1.19316113 |
| MRPL10      | NM_145255.2 | MRPL10      | 17 | Homo sapiens              | MGC17973; RI              | 0.00083505 | 0.00138058 | 1.19287762 |
| LOC729559   | XM_941844.1 | LOC729559   | 1  | PREDICTED: Homo sapiens s |                           | 0.01638484 | 0.01739179 | 1.19266506 |
| VGLL4       | NM_014667.1 | VGLL4       | 3  | Homo sapiens              | VGL-4; KIAA0              | 0.00354651 | 0.00472617 | 1.192646   |
| UCHL3       | NM_006002.3 | UCHL3       | 13 | Homo sapiens              | UCH-L3                    | 0.00019241 | 0.00040808 | 1.19254685 |
| LOC729086   | XM_00112928 | LOC729086   | 1  | PREDICTED: Homo sapiens s |                           | 0.0018464  | 0.00270456 | 1.1922396  |
| UBE2N       | NM_003348.3 | UBE2N       | 12 | Homo sapiens              | MGC8489; MG               | 2.1501E-05 | 6.9689E-05 | 1.19158065 |
| ATG7        | NM_006395.1 | ATG7        | 3  | Homo sapiens              | APG7L; DKFZp              | 0.00560614 | 0.00701087 | 1.19143959 |
| ZFYVE19     | NM_032850.3 | ZFYVE19     | 15 | Homo sapiens              | FLJ14840; MPI             | 0.01018797 | 0.0116544  | 1.19131287 |
| IK          | NM_006083.2 | IK          | 5  | Homo sapiens              | RED; MGC597               | 2.7699E-06 | 1.4338E-05 | 1.19107234 |
| IDH2        | NM_002168.2 | IDH2        | 15 | Homo sapiens              | ICD-M; IDHM;              | 0.00802145 | 0.00950956 | 1.19086825 |
| FAM117B     | NM_173511.2 | FAM117B     | 2  | Homo sapiens              | FLJ38771; DK              | 0.00187661 | 0.00274285 | 1.19060061 |
| SFRS7       | NM_00103168 | SFRS7       | 2  | Homo sapiens              | 9G8; HSSG1;               | 0.00031004 | 0.00060397 | 1.19058937 |



## 5.0 Upreg

|             |             |              |    |                              |            |            |            |
|-------------|-------------|--------------|----|------------------------------|------------|------------|------------|
| UBE3C       | NM_014671.1 | UBE3C        | 7  | Homo sapiens KIAA10; KIAA    | 2.5097E-05 | 7.8502E-05 | 1.19047833 |
| SLC24A6     | NM_024959.2 | SLC24A6      | 12 | Homo sapiens FLJ22233; NC    | 0.00124329 | 0.00193724 | 1.19010715 |
| FAM104A     | NM_032837.1 | FAM104A      | 17 | Homo sapiens FLJ14775        | 1.0993E-05 | 4.101E-05  | 1.18995939 |
| ZNF143      | NM_003442.3 | ZNF143       | 11 | Homo sapiens pHZ-1; STAF;    | 0.01120978 | 0.01263062 | 1.18950747 |
| NSFL1C      | NM_182483.1 | NSFL1C       | 20 | Homo sapiens UBXD10; p47;    | 0.00361163 | 0.00479474 | 1.18929227 |
| C16orf58    | NM_022744.1 | C16ORF58     | 16 | Homo sapiens FLJ13868        | 3.5441E-05 | 0.00010383 | 1.18913813 |
| INTS1       | NM_00108045 | INTS1        | 7  | Homo sapiens KIAA1440; DK    | 0.00023584 | 0.00048145 | 1.18899876 |
| MYH10       | NM_005964.1 | MYH10        | 17 | Homo sapiens NMMHCB; MGC     | 5.541E-06  | 2.4068E-05 | 1.18863584 |
| NUB1        | NM_016118.3 | NUB1         | 7  | Homo sapiens NUB1L; NYREI    | 0.01293612 | 0.0142411  | 1.18861993 |
| TMEM118     | NM_032814.1 | TMEM118      |    | Homo sapiens FLJ14627        | 0.00012103 | 0.00027886 | 1.18789454 |
| LOC728809   | XM_00171954 | LOC728809    |    | PREDICTED: Homo sapiens h    | 0.00113198 | 0.00178665 | 1.18771856 |
| KTI12       | NM_138417.2 | KTI12        | 1  | Homo sapiens TOT4; SBBI81    | 0.00170648 | 0.0025313  | 1.18754346 |
| PAPD5       | NM_022447.1 | PAPD5        | 16 | Homo sapiens FLJ40270; TRI   | 0.00389425 | 0.00512727 | 1.18742853 |
| IER3IP1     | NM_016097.2 | IER3IP1      | 18 | Homo sapiens PR02309; HSF    | 0.00211576 | 0.00304323 | 1.18739819 |
| LOC10012950 | XM_00172168 | LOC10012950  |    | PREDICTED: Homo sapiens h    | 0.00838134 | 0.00988279 | 1.18705306 |
| LOC10013486 | NR_004846.2 | LOC10013486  | 20 | Homo sapiens hypothetical L  | 0.00242012 | 0.00340509 | 1.18663584 |
| SNX2        | NM_003100.2 | SNX2         | 5  | Homo sapiens TRG-9; MGC5;    | 7.8073E-05 | 0.00019577 | 1.1862215  |
| RABL2B      | NM_007081.2 | RABL2B       | 22 | Homo sapiens RAB, member     | 0.00179911 | 0.00264855 | 1.18620228 |
| CARHSP1     | NM_014316.1 | CARHSP1      | 16 | Homo sapiens CSCD1; MGC1     | 0.00017426 | 0.00037566 | 1.18611443 |
| YIPF3       | NM_015388.2 | YIPF3        | 6  | Homo sapiens FinGER3; dJ33   | 5.34E-05   | 0.00014399 | 1.18576446 |
| LRRC1       | NM_025168.1 | LRRC1        | 6  | Homo sapiens DJ523E19.1; L   | 0.01361756 | 0.0148663  | 1.18554749 |
| DAD1        | NM_001344.1 | DAD1         | 14 | Homo sapiens OST2            | 1.3032E-07 | 1.6476E-06 | 1.18539872 |
| PSAP        | NM_002778.1 | PSAP         | 10 | Homo sapiens GLBA; SAP1; I   | 1.1087E-06 | 7.2328E-06 | 1.18523548 |
| CCND1       | NM_053056.1 | CCND1        | 11 | Homo sapiens PRAD1; D11S;    | 4.5533E-07 | 3.8267E-06 | 1.18512658 |
| LOC203547   | NM_00101798 | LOC203547    |    | Homo sapiens MGC131652; I    | 0.00020951 | 0.00043612 | 1.18477892 |
| INTS4       | XM_941208.1 | INTS4        | 11 | Homo sapiens INT4; MST093    | 0.05040738 | 0.04459759 | 1.18459948 |
| RDH14       | NM_020905.1 | RDH14        | 2  | Homo sapiens PAN2            | 0.00030096 | 0.00058995 | 1.184563   |
| GTF2H5      | NM_207118.1 | GTF2H5       | 6  | Homo sapiens C6orf175; TTC   | 1.2345E-06 | 7.8486E-06 | 1.18450671 |
| ATMIN       | NM_015251.2 | ATMIN        | 16 | Homo sapiens FLJ76795; ZNF   | 0.00848156 | 0.00997683 | 1.18437107 |
| UBXN1       | NM_015853.3 | UBXN1        | 11 | Homo sapiens 2B28            | 5.179E-06  | 2.2938E-05 | 1.18385205 |
| STX16       | NM_00100143 | STX16        | 20 | Homo sapiens hsyn16; SYN1    | 0.0030459  | 0.00413951 | 1.18362684 |
| LOC730990   | XM_00172206 | LOC730990    |    | PREDICTED: Homo sapiens h    | 0.00925488 | 0.010751   | 1.18361522 |
| DPM3        | NM_153741.1 | DPM3         | 1  | Homo sapiens MGC34275; M     | 0.00091031 | 0.00148293 | 1.18360748 |
| LOC648921   | XM_00172057 | LOC648921    |    | PREDICTED: Homo sapiens s    | 0.00200458 | 0.00289995 | 1.18301626 |
| PIN1        | NM_006221.2 | PIN1         | 19 | Homo sapiens UBL5; DOD       | 2.9878E-06 | 1.5162E-05 | 1.18289221 |
| RAP1BL      | NM_00108970 | RAP1BL       |    | Homo sapiens hCG1757335 (    | 0.02863551 | 0.02789784 | 1.18282846 |
| COPB2       | NM_004766.1 | COPB2        | 3  | Homo sapiens beta'-COP       | 3.2708E-05 | 9.6756E-05 | 1.18233981 |
| GTF3C1      | NM_001520.1 | GTF3C1       | 16 | Homo sapiens TFIIC220; TF    | 0.0010493  | 0.00167544 | 1.18170698 |
| LOC10013198 | XM_00172507 | LOC10013198  |    | 2 PREDICTED: Homo sapiens h  | 0.00024818 | 0.0005022  | 1.18161173 |
| PIP4K2A     | NM_005028.4 | PIP4K2A      | 10 | Homo sapiens PIP5KII-alpha;  | 2.6369E-06 | 1.3788E-05 | 1.1814802  |
| FOS         | NM_005252.2 | FOS          | 14 | Homo sapiens c-fos           | 3.578E-06  | 1.7421E-05 | 1.18119554 |
| SLC35E1     | NM_024881.3 | SLC35E1      | 19 | Homo sapiens MGC44954; FL    | 0.00358354 | 0.00476249 | 1.18117303 |
| SETD3       | NM_199123.1 | SETD3        | 14 | Homo sapiens C14orf154; FL   | 0.00056028 | 0.00099211 | 1.18101956 |
| IRF3        | NM_001571.2 | IRF3         | 19 | Homo sapiens interferon reg  | 0.01250758 | 0.01384227 | 1.18095158 |
| ZBTB4       | NM_020899.2 | ZBTB4        | 17 | Homo sapiens KAISO-L1; KIA   | 0.00899783 | 0.01050106 | 1.18052641 |
| ANKMY2      | NM_020319.1 | ANKMY2       | 7  | Homo sapiens DKFZP564O04     | 0.00175357 | 0.0025902  | 1.1801236  |
| APRT        | NM_000485.2 | APRT         | 16 | Homo sapiens MGC125857; J    | 1.4348E-05 | 5.0741E-05 | 1.17972419 |
| FNDC3B      | NM_00113509 | FNDC3B       | 3  | Homo sapiens fibronectin typ | 0.00071635 | 0.00121174 | 1.17961294 |
| C21orf55    | NM_017833.2 | C21ORF55     | 21 | Homo sapiens C21orf78        | 3.9232E-05 | 0.0001122  | 1.17954219 |
| UCRC        | NM_00100368 | UCRC         | 22 | Homo sapiens HSPC151; HSF    | 0.00224364 | 0.00319781 | 1.17950119 |
| LRAP        | NM_022350.1 | LRAP         | 5  | Homo sapiens FLJ23633; FLJ   | 0.0023896  | 0.00337188 | 1.17926576 |
| C3orf34     | NM_032898.2 | C3ORF34      | 3  | Homo sapiens MGC14126        | 0.00052649 | 0.00094005 | 1.17895082 |
| LOC644033   | XM_927280.1 | LOC644033    |    | 8 PREDICTED: Homo sapiens s  | 0.00148946 | 0.00225514 | 1.17849867 |
| DBNL        | NM_014063.5 | DBNL         | 7  | Homo sapiens SH3P7; HIP-5'   | 4.0225E-05 | 0.00011429 | 1.17823303 |
| C15orf63    | NM_016400.2 | C15ORF63     | 15 | Homo sapiens HSPC136         | 0.0001733  | 0.00037415 | 1.17822349 |
| XRCC2       | NM_005431.1 | XRCC2        | 7  | Homo sapiens DKFZp781P09     | 0.02100026 | 0.02149012 | 1.17820979 |
| VARS2       | NM_020442.3 | VARS2        | 6  | Homo sapiens VARS2L; MGC     | 0.02202196 | 0.022405   | 1.17775315 |
| LOC10012808 | XM_00171979 | LOC100128084 |    | PREDICTED: Homo sapiens h    | 3.077E-05  | 9.1985E-05 | 1.1771448  |
| HSD17B7     | NM_016371.2 | HSD17B7      | 1  | Homo sapiens MGC12523; M     | 0.00074715 | 0.00125704 | 1.17713652 |
| PAIP2       | NM_00103311 | PAIP2        | 5  | Homo sapiens PAIP2A; MGC7    | 2.625E-05  | 8.1128E-05 | 1.17688964 |
| SCARB2      | NM_005506.2 | SCARB2       | 4  | Homo sapiens CD36L2; HLGf    | 8.3099E-06 | 3.274E-05  | 1.17688713 |
| SLC2A6      | NM_017585.2 | SLC2A6       | 9  | Homo sapiens GLUT6; HSA01    | 0.01605931 | 0.01708761 | 1.17666926 |
| ISG15       | NM_005101.1 | ISG15        | 1  | Homo sapiens G1P2; UCRP; I   | 1.63E-05   | 5.6261E-05 | 1.17659858 |
| IL18        | NM_001562.2 | IL18         | 11 | Homo sapiens MGC12320; IL    | 4.8082E-06 | 2.1779E-05 | 1.17656874 |
| MYO9B       | NM_004145.2 | MYO9B        | 19 | Homo sapiens MYR5; CELIAC    | 0.00633701 | 0.00778616 | 1.17653785 |
| C4orf27     | NM_017867.1 | C4ORF27      | 4  | Homo sapiens FLJ20534        | 0.00287988 | 0.00394074 | 1.17642332 |
| RHOC        | NM_175744.3 | RHOC         | 1  | Homo sapiens H9; ARHC; MC    | 3.8295E-07 | 3.3735E-06 | 1.17630618 |
| SH3GLB2     | NM_020145.2 | SH3GLB2      | 9  | Homo sapiens PP9455; PP65    | 6.8851E-06 | 2.8455E-05 | 1.17616681 |
| SARS        | NM_006513.2 | SARS         | 1  | Homo sapiens SERRS; FLJ36    | 0.00021387 | 0.0004433  | 1.17614321 |
| LOC10013171 | XR_038705.1 | LOC100131718 |    | PREDICTED: Homo sapiens n    | 0.00015066 | 0.0003333  | 1.1759899  |

## 5.0 Upreg

|             |                          |                                 |            |            |            |
|-------------|--------------------------|---------------------------------|------------|------------|------------|
| ZNF69       | NM_021915.2 ZNF69        | 19 Homo sapiens MGC59928; C     | 0.00208419 | 0.00300225 | 1.17594141 |
| RALA        | NM_005402.2 RALA         | 7 Homo sapiens MGC48949; R      | 6.9499E-06 | 2.8669E-05 | 1.17560294 |
| GALK1       | NM_000154.1 GALK1        | 17 Homo sapiens GALK; GK1       | 8.3175E-06 | 3.2755E-05 | 1.17548623 |
| ATP1B3      | NM_001679.2 ATP1B3       | PREDICTED: Homo sapiens A       | 5.254E-06  | 2.32E-05   | 1.17535825 |
| MBD4        | NM_003925.1 MBD4         | 3 Homo sapiens MED1             | 0.00097485 | 0.00157173 | 1.17473492 |
| RNF149      | NM_173647.2 RNF149       | 2 Homo sapiens FLJ90504; DN     | 4.7384E-05 | 0.00013066 | 1.1746228  |
| NLGN2       | NM_020795.2 NLGN2        | 17 Homo sapiens KIAA1366        | 0.0080657  | 0.00955426 | 1.17422471 |
| SDF2        | NM_006923.2 SDF2         | 17 Homo sapiens stromal cell-de | 5.2925E-05 | 0.00014297 | 1.17381932 |
| ATP6V0C     | NM_001694.2 ATP6V0C      | PREDICTED: Homo sapiens A       | 1.4968E-05 | 5.2427E-05 | 1.17362598 |
| LOC653489   | XM_934113.1 LOC653489    | PREDICTED: Homo sapiens s       | 0.00225248 | 0.00320936 | 1.17336278 |
| BBS2        | NM_031885.2 BBS2         | 16 Homo sapiens MGC20703; BI    | 0.00826453 | 0.00976343 | 1.17332912 |
| FKBP14      | NM_017946.2 FKBP14       | 7 Homo sapiens FLJ20731; FK     | 0.0018687  | 0.00273403 | 1.17332194 |
| SF4         | NM_182812.1 SF4          | 19 Homo sapiens F23858; DKFZ    | 0.00081402 | 0.00135269 | 1.17328414 |
|             | Hs.475334 HS.475334      | 11 Human mRNA for KIAA0280      | 0.00374838 | 0.00495604 | 1.17312034 |
| SDHALP1     | XM_926458.1 SDHALP1      | Homo sapiens SDHAL1             | 0.03080209 | 0.02961402 | 1.17311903 |
| GORASP1     | NM_031899.2 GORASP1      | 3 Homo sapiens P65; GRASP65     | 0.01351203 | 0.01477684 | 1.1730852  |
| PGRMC2      | NM_006320.1 PGRMC2       | 4 Homo sapiens DG6; PMBP        | 0.00022468 | 0.00046168 | 1.17300163 |
| ITGB1       | NM_002211.2 ITGB1        | 10 Homo sapiens GPIIA; VLAB;    | 8.8976E-06 | 3.4574E-05 | 1.17264796 |
| MAP1S       | NM_018174.4 MAP1S        | 19 Homo sapiens VC2IP-1; C19    | 0.00257508 | 0.00358403 | 1.17250704 |
| VAT1        | NM_006373.2 VAT1         | 17 Homo sapiens FLJ20230; VA    | 0.00012809 | 0.00029229 | 1.17234957 |
| CMAS        | NM_018686.3 CMAS         | 12 Homo sapiens cytidine mono   | 4.2743E-05 | 0.00012009 | 1.17223436 |
| CCBE1       | NM_133459.1 CCBE1        | 18 Homo sapiens FLJ30681; MG    | 0.00033071 | 0.00063758 | 1.1720124  |
| SUCLG1      | NM_003849.1 SUCLG1       | 2 Homo sapiens FLJ21114; SU     | 6.1764E-06 | 2.6154E-05 | 1.17197827 |
| ARIH2       | NM_006321.1 ARIH2        | 3 Homo sapiens FLJ10938; TR     | 1.432E-05  | 5.0663E-05 | 1.17177933 |
| PRAGMIN     | NM_00108082 PRAGMIN      | 8 Homo sapiens DKFZp761P04      | 0.00012621 | 0.00028882 | 1.17136793 |
| GALNTL4     | NM_198516.1 GALNTL4      | 11 Homo sapiens GALNT18; MG     | 0.01491383 | 0.01604586 | 1.17133895 |
| C17orf62    | NM_00103304 C17ORF62     | 17 Homo sapiens MGC4368; FLJ    | 0.0266993  | 0.02636575 | 1.17099467 |
| CDK10       | NM_00109853 CDK10        | 16 Homo sapiens PISSLRE         | 0.00246176 | 0.00345315 | 1.17067051 |
| NCBP2       | NM_007362.3 NCBP2        | 3 Homo sapiens PIG5; CBP20      | 1.6946E-05 | 5.7988E-05 | 1.17037849 |
| CTSA        | NM_000308.1 CTSA         | 20 Homo sapiens NGBE; PPCA; I   | 0.0216322  | 0.02205449 | 1.17013245 |
| C15orf24    | NM_020154.2 C15ORF24     | 15 Homo sapiens C11orf3; HT02   | 9.9455E-06 | 3.7841E-05 | 1.17011623 |
| PFKFB3      | NM_004566.2 PFKFB3       | 10 Homo sapiens PFK2; IPFK2     | 0.00020889 | 0.00043503 | 1.17010504 |
| EID2B       | NM_152361.1 EID2B        | 19 Homo sapiens EID-3; FLJ389   | 0.0008729  | 0.00143156 | 1.17003101 |
| DPYSL2      | NM_001386.4 DPYSL2       | 8 Homo sapiens DHPRP2; DRP-     | 9.7439E-06 | 3.7236E-05 | 1.16956344 |
| PTCD1       | NM_015545.2 PTCD1        | 7 Homo sapiens KIAA0632         | 0.00013596 | 0.00030643 | 1.16946997 |
| CD68        | NM_001251.2 CD68         | 17 Homo sapiens DKFZp686M18     | 0.0198707  | 0.02049918 | 1.16940774 |
| SF3B5       | NM_031287.2 SF3B5        | 6 Homo sapiens SF3b10; MGC:     | 0.00012963 | 0.00029488 | 1.16924943 |
| PRKCA       | NM_002737.2 PRKCA        | 17 Homo sapiens MGC129901; I    | 0.00183592 | 0.0026928  | 1.16920462 |
| FGF19       | NM_005117.2 FGF19        | 11 Homo sapiens fibroblast grov | 0.00415007 | 0.00541937 | 1.1688817  |
| GYG1        | NM_004130.2 GYG1         | 3 Homo sapiens GYG              | 4.6537E-05 | 0.00012881 | 1.16857444 |
| ARHGEF10    | NM_014629.2 ARHGEF10     | 8 Homo sapiens EGF10; DKFZ:     | 0.00013281 | 0.00030063 | 1.16842818 |
| HSD17B4     | NM_000414.1 HSD17B4      | 5 Homo sapiens MFE-2            | 0.00017442 | 0.00037582 | 1.16830075 |
| VPS41       | NM_014396.2 VPS41        | 7 Homo sapiens HVSP41           | 0.0100514  | 0.0115192  | 1.16778439 |
| NTHL1       | NM_002528.4 NTHL1        | 16 Homo sapiens NTH1; OCTS3     | 0.01504075 | 0.01616655 | 1.16770853 |
| HIST3H2A    | NM_033445.2 HIST3H2A     | 1 Homo sapiens MGC3165          | 0.02020523 | 0.02080271 | 1.16761205 |
| LOC90586    | XR_000544.1 LOC90586     | 17 PREDICTED: Homo sapiens A    | 7.2747E-05 | 0.00018464 | 1.1676118  |
| UBE2O       | NM_022066.2 UBE2O        | 17 Homo sapiens E2-230K; KIA    | 0.00938965 | 0.01088882 | 1.16759265 |
| C19orf53    | NM_014047.1 C19ORF53     | 19 Homo sapiens HSPC023         | 3.9897E-06 | 1.8922E-05 | 1.16751181 |
| GCLM        | NM_002061.2 GCLM         | 1 Homo sapiens GLCLR            | 0.01532666 | 0.0164336  | 1.16739914 |
| RNF181      | NM_016494.3 RNF181       | 2 Homo sapiens HSPC238          | 7.2339E-06 | 2.9453E-05 | 1.16714664 |
| INTS3       | NM_023015.3 INTS3        | 1 Homo sapiens FLJ44849; C1     | 0.0017083  | 0.00253315 | 1.16698165 |
| XPR1        | NM_004736.3 XPR1         | 1 Homo sapiens xenotropic anc   | 0.000591   | 0.0010346  | 1.1669741  |
| RALY        | NM_007367.2 RALY         | 20 Homo sapiens P542; MGC11:    | 0.00024243 | 0.00049296 | 1.16690354 |
| M6PR        | NM_002355.2 M6PR         | 12 Homo sapiens SMPR; FLJ329    | 0.0013031  | 0.0020154  | 1.16684116 |
| TMED9       | NM_017510.3 TMED9        | 5 Homo sapiens HSGP25L2G        | 1.6852E-05 | 5.7781E-05 | 1.16681765 |
| HSPA5       | NM_005347.2 HSPA5        | 9 Homo sapiens BIP; FLJ26106    | 0.00059497 | 0.00104052 | 1.16657155 |
| ADNP2       | NM_014913.2 ADNP2        | 18 Homo sapiens KIAA0863; ZN    | 0.00069389 | 0.0011792  | 1.16648723 |
| ZDHHC23     | NM_173570.2 ZDHHC23      | 3 Homo sapiens MGC42530; N:     | 0.01312049 | 0.01441332 | 1.16641419 |
| CGGBP1      | NM_003663.3 CGGBP1       | 3 Homo sapiens CGGBP; p20-C     | 0.00015216 | 0.00033602 | 1.16637104 |
| ARL16       | XM_290777.4 ARL16        | 17 Homo sapiens ADP-ribosylati  | 0.00084578 | 0.00139412 | 1.16625137 |
| RRP8        | NM_015324.2 RRP8         | 11 Homo sapiens RRP8            | 0.01355359 | 0.01481121 | 1.16586358 |
| PERP        | NM_022121.2 PERP         | 6 Homo sapiens THW; RP3-496     | 3.1443E-05 | 9.3614E-05 | 1.16557938 |
| AP3D1       | NM_003938.4 AP3D1        | 19 Homo sapiens hBLVR; ADTD     | 0.00226271 | 0.00321976 | 1.16466393 |
| CHMP4A      | NM_014169.2 CHMP4A       | 14 Homo sapiens SNF7-1; C14o    | 0.00218281 | 0.00312176 | 1.16450116 |
| CCNK        | NM_003858.2 CCNK         | 14 Homo sapiens CPR4; MGC91     | 0.00018355 | 0.00039156 | 1.16417712 |
| LOC10013356 | XM_00172454 LOC100133565 | PREDICTED: Homo sapiens s       | 1.4615E-05 | 5.1519E-05 | 1.16397829 |
| IGFBP2      | NM_000597.2 IGFBP2       | 2 Homo sapiens IGF-BP53; IBF    | 0.00062689 | 0.00108595 | 1.16364624 |
| ATP6V1A     | NM_001690.2 ATP6V1A      | 3 Homo sapiens VA68; Vma1;      | 4.2067E-05 | 0.00011876 | 1.16337951 |
| SELK        | NM_021237.3 SELK         | 3 Homo sapiens HSPC297; MG      | 0.00955774 | 0.01104578 | 1.16317949 |
| APEH        | NM_001640.3 APEH         | 3 Homo sapiens D3S48E; APH;     | 9.2156E-06 | 3.5573E-05 | 1.16303164 |

## 5.0 Upreg

|             |                          |                                |            |            |            |
|-------------|--------------------------|--------------------------------|------------|------------|------------|
| MGAT1       | NM_002406.2 MGAT1        | 5 Homo sapiens GLYT1; GLCT1    | 0.00048718 | 0.00088115 | 1.16237399 |
| API5        | NM_006595.2 API5         | 11 Homo sapiens AAC-11; AAC1   | 1.7719E-05 | 6.0004E-05 | 1.1622256  |
| TSPAN5      | NM_005723.2 TSPAN5       | 4 Homo sapiens TSPAN-5; TMA    | 0.00089812 | 0.00146661 | 1.16222118 |
| LOC399900   | NM_00101366 LOC399900    | 11 Homo sapiens hypothetical g | 0.00027839 | 0.00055125 | 1.16206297 |
| ATP6V1H     | NM_213620.1 ATP6V1H      | 8 Homo sapiens SFDbeta; CGI-   | 0.00657844 | 0.00803442 | 1.16203527 |
| GNAI2       | NM_002070.2 GNAI2        | 3 Homo sapiens H_LUCA16.1;     | 0.00021104 | 0.00043878 | 1.16202682 |
| CIAO1       | NM_004804.2 CIAO1        | 2 Homo sapiens WDR39; CIA1     | 0.00036118 | 0.00068607 | 1.16187243 |
| PRCP        | NM_005040.2 PRCP         | 11 Homo sapiens HUMPCP; PCP;   | 3.8625E-06 | 1.8448E-05 | 1.16151722 |
| KLHDC5      | NM_020782.1 KLHDC5       | 12 Homo sapiens MGC131714; I   | 0.00074023 | 0.00124708 | 1.1614822  |
| ANKS1A      | NM_015245.1 ANKS1A       | 6 Homo sapiens ANKS1; KIAAC    | 0.00163235 | 0.00243535 | 1.16112158 |
| PTDSS2      | NM_030783.1 PTDSS2       | 11 Homo sapiens PSS2           | 0.00235679 | 0.00333147 | 1.16083427 |
| NCOA4       | NM_005437.1 NCOA4        | 10 Homo sapiens RFG; ARA70; I  | 1.028E-05  | 3.8944E-05 | 1.16057319 |
| LOC645452   | XM_939733.2 LOC645452    | PREDICTED: Homo sapiens s      | 0.00012927 | 0.00029437 | 1.1595563  |
| DHX16       | NM_003587.3 DHX16        | 6 Homo sapiens DDX16; DBP2,    | 0.00038462 | 0.00072433 | 1.15946049 |
| DCTN3       | NM_024348.2 DCTN3        | 9 Homo sapiens MGC111190; I    | 0.00187397 | 0.00273992 | 1.15879096 |
| RHOG        | NM_001665.2 RHOG         | 11 Homo sapiens MGC125836; I   | 0.00033005 | 0.00063674 | 1.1586889  |
| ZMAT3       | NM_152240.1 ZMAT3        | 3 Homo sapiens PAG608; WIG;    | 0.00021706 | 0.00044854 | 1.15864569 |
| TP53BP1     | NM_005657.1 TP53BP1      | 15 Homo sapiens 53BP1; MGC1.   | 0.00143736 | 0.00218948 | 1.1585477  |
| MRPS33      | NM_016071.2 MRPS33       | 7 Homo sapiens FLJ21123; CG    | 0.00059344 | 0.00103826 | 1.15853873 |
| LOC728565   | XM_928286.1 LOC728565    | 5 PREDICTED: Homo sapiens s    | 0.02514592 | 0.0250973  | 1.1585369  |
| ARPC5L      | NM_030978.1 ARPC5L       | 9 Homo sapiens MGC3038; AR     | 0.00021513 | 0.00044528 | 1.15847129 |
| POFUT1      | NM_015352.1 POFUT1       | 20 Homo sapiens O-Fuc-T; O-FU  | 0.00052983 | 0.00094506 | 1.15805462 |
| LOC10019093 | NR_024462.1 LOC10019093  | 17 Homo sapiens hypothetical L | 0.00252713 | 0.0035268  | 1.15797059 |
| CEP27       | NM_018097.1 CEP27        | 15 Homo sapiens FLJ10460; C1   | 0.00383475 | 0.00505804 | 1.15787906 |
| RNF167      | NM_015528.1 RNF167       | 17 Homo sapiens 5730408C10R    | 0.01335105 | 0.01462997 | 1.15759165 |
| LOC10012936 | XM_00172143 LOC100129362 | PREDICTED: Homo sapiens h      | 0.00358748 | 0.00476701 | 1.15758811 |
| ITGB1BP1    | NM_004763.2 ITGB1BP1     | 2 Homo sapiens ICAP1B; ICAP-   | 0.00349806 | 0.00467011 | 1.1571789  |
| ATP5D       | NM_001687.4 ATP5D        | 19 Homo sapiens ATP synthase,  | 2.61E-05   | 8.0835E-05 | 1.15717311 |
| GPR172A     | NM_024531.3 GPR172A      | 8 Homo sapiens GPCR41; PAR1    | 1.7169E-05 | 5.8593E-05 | 1.15678806 |
| CD9         | NM_001769.2 CD9          | 12 Homo sapiens MRP-1; MIC3;   | 0.00130179 | 0.0020141  | 1.15670353 |
| HEXB        | NM_000521.2 HEXB         | 5 Homo sapiens ENC-1A5         | 3.1652E-06 | 1.5788E-05 | 1.15662451 |
| FOXC1       | NM_001453.1 FOXC1        | 6 Homo sapiens FREAC3; FKHL    | 3.8961E-06 | 1.8578E-05 | 1.1564722  |
| PTPLAD2     | NM_00101091 PTPLAD2      | 9 Homo sapiens DKFZp686F01     | 0.00354174 | 0.00472053 | 1.15639737 |
| RPUSD3      | NM_173659.2 RPUSD3       | 3 Homo sapiens FLJ34707; MG    | 0.0002399  | 0.00048848 | 1.15639128 |
| TUBA4A      | Hs.544637 HS.544637      | 6 xr14b10.x1 NCI_CGAP_Lu28     | 0.00446957 | 0.00575774 | 1.15629591 |
| ZDHHC8      | NM_006000.1 TUBA4A       | 2 Homo sapiens TUBA1; H2-AL    | 0.00130131 | 0.0020137  | 1.15599373 |
| DAP3        | NM_013373.2 ZDHHC8       | 22 Homo sapiens ZNF378; ZDH    | 1.0963E-05 | 4.0914E-05 | 1.15595781 |
| LOC255167   | NM_033657.1 DAP3         | 1 Homo sapiens MGC126059; I    | 1.7316E-05 | 5.8935E-05 | 1.15586199 |
| WDR79       | NR_024424.1 LOC255167    | 5 Homo sapiens hypothetical L  | 0.0001307  | 0.00029693 | 1.15563686 |
| SLC25A11    | NM_003562.3 SLC25A11     | 17 Homo sapiens WRAP53; FLJ1   | 0.02808028 | 0.0274759  | 1.15559589 |
| DUSP19      | NM_080876.2 DUSP19       | 17 Homo sapiens SLC20A4; OGC   | 0.04576283 | 0.04124531 | 1.1554817  |
| CDC7        | NM_003503.2 CDC7         | 2 Homo sapiens MGC138210; S    | 0.00573194 | 0.0071468  | 1.15547744 |
| FASTKD5     | NM_021826.4 FASTKD5      | 1 Homo sapiens HsCDC7; MGC     | 0.00047715 | 0.00086623 | 1.15537401 |
| C7orf50     | NM_032350.3 C7ORF50      | 20 Homo sapiens FLJ13149; dJ1  | 0.01755944 | 0.01845993 | 1.15508657 |
| NLRP8       | NM_176811.2 NLRP8        | 7 Homo sapiens MGC11257; Yc    | 1.572E-05  | 5.4582E-05 | 1.15490512 |
| BSG         | NM_001728.2 BSG          | 19 Homo sapiens CLR19.2; NAL   | 0.00042255 | 0.00078331 | 1.15485711 |
| PAQR4       | NM_152341.2 PAQR4        | 10 Homo sapiens cDNA FLJ1326   | 0.0001681  | 0.00036445 | 1.15475389 |
| ZNF791      | NM_153358.1 ZNF791       | 19 Homo sapiens EMMPRIN; OK    | 2.8846E-05 | 8.7456E-05 | 1.15468947 |
| LCOR        | NM_032440.1 LCOR         | 16 Homo sapiens FLJ30002       | 0.00113998 | 0.00179798 | 1.15466473 |
| OAT         | NM_000274.1 OAT          | 19 Homo sapiens MGC126179; I   | 0.04607998 | 0.04147576 | 1.15458353 |
| PRPF19      | NM_014502.3 PRPF19       | 10 Homo sapiens FLJ38026; ML   | 0.00079119 | 0.00132    | 1.15404944 |
| POMP        | NM_015932.2 POMP         | 10 Homo sapiens HOGA; DKFZp    | 2.0578E-05 | 6.7495E-05 | 1.15376399 |
| DDX24       | NM_020414.3 DDX24        | 11 Homo sapiens NMP200; PRP1   | 0.00301842 | 0.00410662 | 1.15297866 |
| TIPRL       | NM_152902.3 TIPRL        | 13 Homo sapiens UMP1; HSPCO    | 1.277E-05  | 4.6165E-05 | 1.15252152 |
| FAM120AOS   | NM_198841.2 FAM120AOS    | 14 Homo sapiens DEAD (Asp-Glu  | 5.0259E-05 | 0.00013725 | 1.15231748 |
| MGC61598    | XM_939432.1 MGC61598     | 1 Homo sapiens RP1-69E11.1;    | 0.03533428 | 0.0332215  | 1.15229366 |
| NOSIP       | NM_015953.3 NOSIP        | 9 Homo sapiens C9orf100S; Fl   | 0.00533888 | 0.00672168 | 1.15228365 |
| ZNF770      | NM_014106.2 ZNF770       | 0.00707834                     | 0.00854034 | 0.00854034 | 1.15139871 |
| PREPL       | NM_006036.3 PREPL        | 19 Homo sapiens CGI-25         | 7.9995E-07 | 5.7063E-06 | 1.15118137 |
| LOC648390   | XR_037845.1 LOC648390    | 15 Homo sapiens FLJ20582; PR   | 0.00461254 | 0.00591932 | 1.15101847 |
| ADCY6       | NM_020983.2 ADCY6        | 2 Homo sapiens FLJ16627; KIA   | 0.01796122 | 0.01879448 | 1.15090849 |
| DCAF7       | NM_005828.2 DCAF7        | 2 PREDICTED: Homo sapiens n    | 3.2454E-05 | 9.6102E-05 | 1.15080537 |
| C19orf22    | NM_138774.2 C19ORF22     | 12 Homo sapiens KIAA0422; DK   | 0.05601155 | 0.04878838 | 1.15076869 |
| MRPL41      | NM_032477.1 MRPL41       | 17 Homo sapiens AN11; HAN11    | 8.7765E-05 | 0.000216   | 1.15051854 |
| RNF103      | NM_005667.2 RNF103       | 19 Homo sapiens MGC16353       | 0.00031363 | 0.00060975 | 1.15042348 |
| TMEM66      | NM_016127.4 TMEM66       | 9 Homo sapiens MRP-L27; RPM    | 5.1676E-05 | 0.00014033 | 1.15032109 |
| MIR1978     | NR_031742.1 MIR1978      | 2 Homo sapiens MGC41857; hl    | 0.01733331 | 0.01827255 | 1.15030652 |
| HIATL2      | NR_002894.1 HIATL2       | 8 Homo sapiens FLJ22274; FO,   | 6.0385E-06 | 2.5769E-05 | 1.15025214 |
|             |                          | Homo sapiens microRNA 197      | 4.4115E-06 | 2.0436E-05 | 1.15012782 |
|             |                          | 9 Homo sapiens FLJ45467; MG    | 0.00232502 | 0.00329559 | 1.14997472 |

5.0 Upreg

|             |                          |                               |            |            |            |
|-------------|--------------------------|-------------------------------|------------|------------|------------|
| SF3B14      | NM_016047.3 SF3B14       | 2 Homo sapiens Ht006; SF3B1   | 7.7817E-06 | 3.1233E-05 | 1.14996746 |
| SHOC2       | NM_007373.2 SHOC2        | 10 Homo sapiens SUR8; SIAA08  | 0.01840404 | 0.01917779 | 1.14947898 |
| QRFPR       | NM_198179.2 QRFPR        | 4 Homo sapiens SP9155; MGC    | 0.00068389 | 0.00116559 | 1.14947632 |
| ZNF14       | NM_021030.2 ZNF14        | 19 Homo sapiens GIOT-4; KOX6  | 0.00025631 | 0.00051651 | 1.14925015 |
| METTL13     | NM_015935.4 METTL13      | 1 Homo sapiens FLJ10310; CG   | 0.00272872 | 0.00376265 | 1.14912327 |
| C9orf5      | NM_032012.1 C9ORF5       | 9 Homo sapiens CG2; FLJ3322   | 0.0048897  | 0.00622854 | 1.14877411 |
| DNAJC10     | NM_018981.1 DNAJC10      | 2 Homo sapiens DKFZp434J18    | 0.00595712 | 0.00738767 | 1.14826666 |
| FAM46A      | NM_017633.2 FAM46A       | 6 Homo sapiens XTP11; C6orf3  | 0.00019984 | 0.00041928 | 1.14819207 |
| GLA         | NM_000169.1 GLA          | X Homo sapiens GALA           | 0.00014856 | 0.00032941 | 1.14765196 |
| SMUG1       | NM_014311.1 SMUG1        | 12 Homo sapiens UNG3; MGC10   | 0.00018799 | 0.00039947 | 1.14763486 |
| RAP1GAP     | NM_002885.1 RAP1GAP      | 1 Homo sapiens KIAA0474; Ra   | 0.00274338 | 0.0037793  | 1.14747926 |
|             | Hs.516646 HS.516646      | 2 Homo sapiens cDNA FLJ4437   | 0.03046749 | 0.02936634 | 1.14713499 |
| SCAP        | NM_012235.2 SCAP         | 3 Homo sapiens KIAA0199       | 4.2171E-05 | 0.00011897 | 1.14705986 |
| TM9SF2      | NM_004800.1 TM9SF2       | 13 Homo sapiens P76; MGC117   | 2.4906E-05 | 7.8045E-05 | 1.14699857 |
| DSCR3       | NM_006052.1 DSCR3        | 21 Homo sapiens DCRA; MGC11   | 0.00601238 | 0.00744883 | 1.14679765 |
| C5orf32     | NM_032412.2 C5ORF32      | 5 Homo sapiens XTP11-FL49     | 0.00307657 | 0.00417667 | 1.14678032 |
| PSME4       | NM_014614.1 PSME4        | 2 Homo sapiens FLJ21864; MG   | 3.437E-05  | 0.00010113 | 1.14643817 |
| TRIM41      | NM_033549.3 TRIM41       | 5 Homo sapiens RINCK; MGC3    | 0.00090546 | 0.0014764  | 1.14636631 |
| GPS1        | NM_004127.4 GPS1         | 17 Homo sapiens COP51; CSN1   | 2.0901E-05 | 6.8351E-05 | 1.14632662 |
| HINT2       | NM_032593.2 HINT2        | 9 Homo sapiens HIT-17         | 0.00751185 | 0.00898431 | 1.14601387 |
| MGST3       | NM_004528.2 MGST3        | 1 Homo sapiens GST-III        | 3.9346E-06 | 1.8742E-05 | 1.14576608 |
| RPUSD1      | NM_058192.2 RPUSD1       | 16 Homo sapiens MGC19600; R   | 0.00037643 | 0.00071182 | 1.14573324 |
| C17orf96    | NM_00113067 C17ORF96     | 17 Homo sapiens chromosome 1  | 0.00214291 | 0.00307472 | 1.14561891 |
| SH3BGR13    | NM_031286.2 SH3BGR13     | 1 Homo sapiens TIP-B1; SH3B   | 0.01480543 | 0.01594879 | 1.14557861 |
| GABARAPL1   | NM_031412.2 GABARAPL1    | 12 Homo sapiens ATG8L; GEC1;  | 0.01443701 | 0.01561903 | 1.14550396 |
| BMP4        | NM_001202.2 BMP4         | 14 Homo sapiens BMP2B1; BMP   | 0.00216887 | 0.00310587 | 1.14526873 |
| TCEB2       | NM_007108.2 TCEB2        | 16 Homo sapiens SIII          | 5.1062E-06 | 2.2685E-05 | 1.14524786 |
| KCNH6       | NM_030779.2 KCNH6        | 17 Homo sapiens HERG2; ERG2   | 5.6737E-05 | 0.00015103 | 1.14502175 |
| CLK3        | NM_003992.1 CLK3         | 15 Homo sapiens FLJ22858      | 0.03499603 | 0.03293523 | 1.14489501 |
| TTL         | NM_153712.3 TTL          | 2 Homo sapiens MGC46235       | 0.00353751 | 0.00471633 | 1.14482171 |
| MYO10       | NM_012334.1 MYO10        | 5 Homo sapiens KIAA0799; M    | 0.01932353 | 0.02000763 | 1.14462011 |
| TMEM158     | NM_015444.1 TMEM158      | 3 Homo sapiens BBP; DKFZp5    | 1.9507E-05 | 6.4784E-05 | 1.14384111 |
| HRASLS3     | NM_007069.1 HRASLS3      | 11 Homo sapiens HREV107-3; H  | 0.01230042 | 0.01365088 | 1.14351631 |
| BIN1        | NM_139343.1 BIN1         | 2 Homo sapiens MGC10367; A    | 0.00045332 | 0.00082742 | 1.14341464 |
| SWAP70      | NM_015055.1 SWAP70       | 11 Homo sapiens HSPC321; FLJ  | 0.0061686  | 0.00762192 | 1.14300584 |
| TOMM70A     | NM_014820.3 TOMM70A      | 3 Homo sapiens FLJ90470       | 0.00031169 | 0.00060665 | 1.14291752 |
| BUD31       | NM_003910.2 BUD31        | 7 Homo sapiens MGC111202; `   | 2.3597E-05 | 7.4934E-05 | 1.14287148 |
| SPPL2A      | NM_032802.2 SPPL2A       | 15 Homo sapiens PSL2; IMP3    | 0.00090589 | 0.00147683 | 1.14271361 |
| KCTD6       | NM_153331.2 KCTD6        | 3 Homo sapiens MGC27385       | 0.00749272 | 0.00896755 | 1.14266605 |
| IMPA1       | NM_005536.2 IMPA1        | 8 Homo sapiens IMPA           | 0.00277125 | 0.00381291 | 1.14227772 |
| CHMP1A      | NM_002768.1 CHMP1A       | 16 Homo sapiens CHMP1A; CHM   | 0.00066199 | 0.00113377 | 1.14199773 |
| CDC34       | NM_004359.1 CDC34        | 19 Homo sapiens UBE2R1; UBC   | 0.00264808 | 0.0036705  | 1.14194685 |
| DMC1        | NM_007068.2 DMC1         | 22 Homo sapiens DMC1H; HsLin  | 0.00033411 | 0.00064328 | 1.14181109 |
| TRMT12      | NM_017956.1 TRMT12       | Homo sapiens FLJ20772; TRI    | 0.00540497 | 0.00679416 | 1.14154112 |
| CLTB        | NM_001834.2 CLTB         | 5 Homo sapiens LCB            | 0.00021784 | 0.00045005 | 1.14153635 |
| CRELD2      | NM_024324.2 CRELD2       | 22 Homo sapiens DKFZp667O05   | 9.3655E-05 | 0.00022762 | 1.14151418 |
| EFHA1       | NM_152726.1 EFHA1        | 13 Homo sapiens FLJ34588; FLJ | 3.6541E-05 | 0.00010616 | 1.14137623 |
| ZNF330      | NM_014487.2 ZNF330       | 4 Homo sapiens NOA36; HSA6    | 0.00574061 | 0.00715457 | 1.1413411  |
| CDKN2AIPNL  | NM_080656.1 CDKN2AIPNL   | 5 Homo sapiens MGC13017       | 6.4946E-07 | 4.9082E-06 | 1.14030166 |
| SOX4        | NM_003107.2 SOX4         | 6 Homo sapiens EVI16          | 0.00049186 | 0.00088852 | 1.14006151 |
| ADRM1       | NM_175573.1 ADRM1        | 20 Homo sapiens Rpn13; GP110  | 1.5275E-05 | 5.3288E-05 | 1.1397637  |
| HERC2       | NM_004667.3 HERC2        | 15 Homo sapiens D15F37S1; p5  | 0.01824898 | 0.01904335 | 1.13967656 |
| CYCSL1      | NR_001561.1 CYCSL1       | 6 Homo sapiens HS11; bA513I   | 3.7619E-05 | 0.00010858 | 1.1394611  |
| ASCC2       | NM_032204.3 ASCC2        | 22 Homo sapiens AS1p100       | 0.00068726 | 0.00116951 | 1.13939119 |
| LOC10013364 | XM_00172510 LOC100133649 | PREDICTED: Homo sapiens h     | 0.00300559 | 0.00409234 | 1.13918676 |
| PSMB1       | NM_002793.2 PSMB1        | 6 Homo sapiens FLJ25321; KIA  | 0.00029795 | 0.0005847  | 1.13907224 |
| RING1       | NM_002931.3 RING1        | 6 Homo sapiens RNF1           | 2.0839E-06 | 1.1587E-05 | 1.13869328 |
| WDR8        | NM_017818.2 WDR8         | 1 Homo sapiens FLJ20430; MG   | 0.00061466 | 0.00106771 | 1.13868767 |
| FLJ46309    | XM_941608.1 FLJ46309     | 9 Homo sapiens hypothetical p | 0.00189977 | 0.0027721  | 1.13791023 |
| SLC1A5      | NM_005628.1 SLC1A5       | 19 Homo sapiens M7V1; ATBO;   | 0.00136744 | 0.00209828 | 1.13775741 |
| LOC10013005 | XM_00172129 LOC10013005  | 10 PREDICTED: Homo sapiens h  | 0.01864259 | 0.01939413 | 1.13755957 |
| C8orf45     | NM_173518.2 C8ORF45      | 8 Homo sapiens FLJ25692       | 0.00028049 | 0.00055503 | 1.13713979 |
| DDX51       | NM_175066.2 DDX51        | 12 Homo sapiens DKFZp686N20   | 0.00240519 | 0.00339007 | 1.13686536 |
| PLOD2       | NM_182943.2 PLOD2        | 3 Homo sapiens LH2; TLH       | 0.00423275 | 0.00550276 | 1.13677566 |
| AVPI1       | NM_021732.1 AVPI1        | 10 Homo sapiens VIP32; PP539  | 0.00235118 | 0.0033257  | 1.13666238 |
| DNAJB11     | NM_016306.4 DNAJB11      | 3 Homo sapiens PR01080; HEI   | 1.9225E-05 | 6.4014E-05 | 1.13663913 |
| ZNF549      | NM_153263.1 ZNF549       | 19 Homo sapiens FLJ34917      | 0.00466504 | 0.00597621 | 1.13658225 |
| P4HA2       | NM_00101797 P4HA2        | 5 Homo sapiens 4-PH alpha 2   | 0.02457923 | 0.02465792 | 1.13651543 |
| KCTD5       | XR_001518.1 KCTD5        | 16 Homo sapiens FLJ20040      | 0.00291051 | 0.00397707 | 1.13630372 |
| ALPP        | NM_001632.2 ALPP         | 2 Homo sapiens PLAP; ALP      | 5.9129E-05 | 0.00015561 | 1.13630196 |

5.0 Upreg

|             |             |             |                               |            |            |            |
|-------------|-------------|-------------|-------------------------------|------------|------------|------------|
| LOC401115   | XM_937968.1 | LOC401115   | PREDICTED: Homo sapiens h     | 2.6312E-06 | 1.3783E-05 | 1.13612004 |
| GNS         | NM_002076.2 | GNS         | 12 Homo sapiens G6S; MGC212   | 5.1183E-05 | 0.00013934 | 1.13590392 |
| SERPINE2    | NM_006216.2 | SERPINE2    | 2 Homo sapiens PI7; GDN; PNI  | 1.9259E-06 | 1.093E-05  | 1.13564283 |
| SIDT2       | NM_015996.1 | SIDT2       | 11 Homo sapiens DKFZp686L17   | 0.00418201 | 0.00544891 | 1.13533158 |
| BTBD3       | NM_181443.1 | BTBD3       | 20 Homo sapiens dJ742J24.1; K | 0.0265213  | 0.02623426 | 1.13490385 |
| TAF10       | NM_006284.2 | TAF10       | 11 Homo sapiens TAF2H; TAF2A  | 0.00024331 | 0.00049439 | 1.13479706 |
| NOMO1       | NM_014287.3 | NOMO1       | 16 Homo sapiens Nomo; PM5     | 0.01834646 | 0.01912688 | 1.13433246 |
| ZNF652      | NM_014897.1 | ZNF652      | 17 Homo sapiens KIAA0924; DK  | 0.00265036 | 0.00367308 | 1.13431194 |
| MAP2K2      | NM_030662.2 | MAP2K2      | 19 Homo sapiens PRKMK2; MAP   | 0.03376302 | 0.03194271 | 1.13425352 |
| TMEM160     | NM_017854.1 | TMEM160     | 19 Homo sapiens FLJ20512      | 0.00036758 | 0.00069673 | 1.13420138 |
| LOC653086   | XM_930963.1 | LOC653086   | 2 PREDICTED: Homo sapiens s   | 0.00824637 | 0.00974591 | 1.13411973 |
| MGC10997    | NR_001565.1 | MGC10997    | 15 Homo sapiens pseudogene M  | 0.00057321 | 0.00101072 | 1.13393004 |
| CKLF        | NM_016326.2 | CKLF        | 16 Homo sapiens UCK-1; CKLF1  | 0.00041997 | 0.00077953 | 1.13382104 |
| DDX50       | NM_024045.1 | DDX50       | 10 Homo sapiens RH-II/GuB; Gl | 0.04792458 | 0.04285906 | 1.13365668 |
| MAN1B1      | NM_016219.2 | MAN1B1      | 9 Homo sapiens MANA-ER        | 0.00139549 | 0.00213459 | 1.13357658 |
| LRRC37B2    | NR_001534.1 | LRRC37B2    | Homo sapiens DKFZp667M24      | 0.00090747 | 0.00147886 | 1.13344375 |
| CCDC125     | NM_176816.3 | CCDC125     | 5 Homo sapiens KENAE          | 0.00677206 | 0.00823079 | 1.13308785 |
| LOC646996   | NR_003543.1 | LOC646996   | 14 Homo sapiens hCG2040201 (  | 0.00277996 | 0.0038219  | 1.13248317 |
| CHMP1B      | NM_020412.3 | CHMP1B      | 18 Homo sapiens C10orf2; C18- | 0.00104365 | 0.00166733 | 1.13220508 |
| SPEN        | NM_015001.2 | SPEN        | 1 Homo sapiens RP1-134O19.1   | 0.00069783 | 0.00118498 | 1.13216515 |
| TMED3       | NM_007364.2 | TMED3       | 15 Homo sapiens MGC133022; (  | 4.3643E-05 | 0.00012207 | 1.13205498 |
| SAP30L      | NM_024632.3 | SAP30L      | 5 Homo sapiens FLJ11526; NS-  | 0.00894281 | 0.01044796 | 1.13195243 |
| EDF1        | NM_003792.2 | EDF1        | 9 Homo sapiens EDF-1; MBF1;   | 1.8961E-05 | 6.3353E-05 | 1.13192994 |
| LOC654121   | XM_942442.1 | LOC654121   | PREDICTED: Homo sapiens s     | 4.2087E-05 | 0.00011877 | 1.13188378 |
| CORO1C      | NM_014325.2 | CORO1C      | 12 Homo sapiens HCRNN4; coro  | 0.00268424 | 0.00371123 | 1.13186276 |
| TMEM17      | NM_198276.1 | TMEM17      | 2 Homo sapiens FLJ34583       | 0.00661423 | 0.00806577 | 1.13178182 |
| PDXP        | NM_020315.3 | PDXP        | 22 Homo sapiens CIN; FLJ3270: | 5.5501E-05 | 0.00014851 | 1.13173696 |
| GMFB        | NM_004124.2 | GMFB        | 14 Homo sapiens GMF           | 0.00069081 | 0.00117487 | 1.13152151 |
| TST         | NM_003312.4 | TST         | 22 Homo sapiens MGC19578; RI  | 3.1174E-05 | 9.3003E-05 | 1.13141339 |
| RNASEK      | NM_00100433 | RNASEK      | 17 Homo sapiens MGC71993      | 7.6622E-05 | 0.00019274 | 1.1312767  |
| EVL         | NM_016337.2 | EVL         | 14 Homo sapiens RNB6          | 0.00252806 | 0.00352754 | 1.13126672 |
| AKR1B1      | NM_001628.2 | AKR1B1      | 7 Homo sapiens ALDR1; MGC1    | 0.0003163  | 0.00061412 | 1.13095704 |
| KYBR5R3     | NM_007326.2 | KYBR5R3     | 22 Homo sapiens DIA1; B5R     | 2.9671E-05 | 8.9278E-05 | 1.1309373  |
| HCG2P7      | NR_001318.1 | HCG2P7      | 6 Homo sapiens HCGII-7; HCG   | 2.4121E-05 | 7.6072E-05 | 1.13076866 |
| ELP3        | NM_018091.3 | ELP3        | 8 Homo sapiens FLJ10422; KA   | 0.00870409 | 0.01020167 | 1.13055916 |
| LOC729603   | NR_003288.1 | LOC729603   | 6 Homo sapiens calcium bindin | 8.8864E-05 | 0.0002181  | 1.13049449 |
| RER1        | NM_007033.3 | RER1        | 1 Homo sapiens RP4-740C4.2    | 0.01529752 | 0.01641037 | 1.13016925 |
| DHX40       | XM_942276.1 | DHX40       | PREDICTED: Homo sapiens C     | 0.00502305 | 0.00637527 | 1.13014421 |
| LOC10013351 | XM_00171450 | LOC10013351 | PREDICTED: Homo sapiens h     | 0.0026961  | 0.00372411 | 1.12990662 |
| AP1M1       | NM_032493.2 | AP1M1       | 19 Homo sapiens MU-1A; CLAPM  | 0.0005719  | 0.00100923 | 1.12948546 |
| RAB26       | NM_014353.4 | RAB26       | 16 Homo sapiens DV46133       | 0.00167951 | 0.00249425 | 1.12920465 |
| ITPKA       | NM_002220.1 | ITPKA       | 15 Homo sapiens IP3KA         | 0.0154171  | 0.0165104  | 1.1291538  |
| C17orf61    | NM_152766.2 | C17orf61    | 17 Homo sapiens MGC40107      | 8.4595E-06 | 3.3254E-05 | 1.12895036 |
| PMM1        | NM_002676.1 | PMM1        | 22 Homo sapiens Sec53         | 0.00593739 | 0.00736633 | 1.12875291 |
| MRPS11      | NM_176805.1 | MRPS11      | 15 Homo sapiens HCC-2; FLJ22! | 0.00112653 | 0.0017803  | 1.12860868 |
| SAR1B       | NM_00103350 | SAR1B       | 5 Homo sapiens CMRD; SARA2    | 0.02857519 | 0.02784835 | 1.12858193 |
| PAPSS1      | NM_005443.4 | PAPSS1      | 4 Homo sapiens SK1; PAPSS; /  | 0.00050942 | 0.00091386 | 1.12822004 |
| DTWD2       | NM_173666.1 | DTWD2       | 5 Homo sapiens MGC138579; I   | 0.01492676 | 0.01605583 | 1.12728276 |
| HMG20B      | NM_006339.1 | HMG20B      | 19 Homo sapiens SMARCE1r; FL  | 9.0844E-05 | 0.00022165 | 1.12687163 |
| CRCP        | NM_014478.4 | CRCP        | 7 Homo sapiens MGC111194; (   | 0.00653735 | 0.00799647 | 1.12686234 |
| ZNF486      | XM_371152.2 | ZNF486      | 19 PREDICTED: Homo sapiens z  | 0.00160709 | 0.00240378 | 1.12683073 |
| PTRF        | NM_012232.2 | PTRF        | 17 Homo sapiens FKSG13        | 0.00011316 | 0.00026421 | 1.12679316 |
| LOC400446   | XR_019205.2 | LOC400446   | PREDICTED: Homo sapiens n     | 0.03972225 | 0.0366211  | 1.12635326 |
| IKBKX       | NM_003639.2 | IKBKX       | Homo sapiens IPD2; FIP3; NI   | 0.04052655 | 0.03720234 | 1.12628773 |
| GTF3C5      | NM_012087.1 | GTF3C5      | 9 Homo sapiens TFIIC63; FLJ;  | 0.01136645 | 0.01278908 | 1.12627151 |
| FSCN1       | NM_003088.2 | FSCN1       | 7 Homo sapiens FLJ38511; SN   | 2.0049E-05 | 6.6082E-05 | 1.12597193 |
| EHD4        | NM_139265.2 | EHD4        | 15 Homo sapiens PAST4         | 0.00667821 | 0.00813475 | 1.12555793 |
| COX6A1      | NM_004373.2 | COX6A1      | 12 Homo sapiens COX6AL; COX   | 5.3878E-05 | 0.00014496 | 1.12554685 |
| HARS        | NM_002109.3 | HARS        | 5 Homo sapiens FLJ20491; HR   | 8.9307E-05 | 0.00021894 | 1.1255453  |
| CLCN7       | NM_001287.3 | CLCN7       | 16 Homo sapiens CLC-7; FLJ39  | 0.00033117 | 0.00063834 | 1.12552239 |
| CENPB       | NM_001810.5 | CENPB       | 20 Homo sapiens centromere pr | 0.00325965 | 0.00438922 | 1.12547027 |
| ATG12       | NM_004707.2 | ATG12       | 5 Homo sapiens APG12L; HAPC   | 0.00578326 | 0.00719953 | 1.12528966 |
| MGEA5       | NM_012215.1 | MGEA5       | 10 Homo sapiens MEA5; FLJ233  | 5.2973E-05 | 0.00014297 | 1.12515848 |
| RPS4Y1      | NM_001008.3 | RPS4Y1      | Homo sapiens RPS4Y; MGC1:     | 8.4037E-05 | 0.00020817 | 1.12504042 |
| TAGLN2      | NM_003564.1 | TAGLN2      | 1 Homo sapiens KIAA0120; HA   | 0.00527191 | 0.0066469  | 1.12494445 |
| C21orf24    | NM_00100178 | C21orf24    | 21 Homo sapiens chromosome 2  | 0.00038285 | 0.00072162 | 1.12491556 |
| RASSF7      | NM_003475.2 | RASSF7      | 11 Homo sapiens C11orf13; HR  | 0.00101259 | 0.00162541 | 1.12489438 |
| MAGT1       | NM_032121.3 | MAGT1       | Homo sapiens RP11-217H1.1     | 0.01448918 | 0.01566581 | 1.12485684 |
| SDHA        | NM_004168.1 | SDHA        | 5 Homo sapiens SDHF; SDH2;    | 0.00042393 | 0.00078571 | 1.12480066 |
| UBE2L6      | NM_198183.1 | UBE2L6      | 11 Homo sapiens UBCH8; RIG-E  | 0.05764264 | 0.04994632 | 1.12459764 |

## 5.0 Upreg

|             |             |             |    |                             |            |            |            |
|-------------|-------------|-------------|----|-----------------------------|------------|------------|------------|
| PIP5K2B     | NM_138687.1 | PIP5K2B     | 17 | Homo sapiens Pip4k2B; PIP5  | 0.00158198 | 0.00237027 | 1.12444633 |
| DYNC1LI2    | NM_006141.2 | DYNC1LI2    | 16 | Homo sapiens DNCL12; LIC2   | 0.00011204 | 0.000262   | 1.12429187 |
| NIPA1       | NM_144599.3 | NIPA1       | 15 | Homo sapiens SPG6; FSP3; N  | 0.00226873 | 0.00322675 | 1.12392534 |
| CDC2L6      | NM_015076.3 | CDC2L6      | 6  | Homo sapiens bA346C16.3; C  | 0.0401967  | 0.0369653  | 1.12376345 |
| FLJ35390    | NR_024416.1 | FLJ35390    | 7  | Homo sapiens hypothetical L | 0.0004427  | 0.0008126  | 1.12375976 |
| LOC202781   | XM_00171439 | LOC202781   |    | PREDICTED: Homo sapiens h   | 0.0014748  | 0.00223835 | 1.12361506 |
| GEMIN6      | NM_024775.9 | GEMIN6      | 2  | Homo sapiens FLJ23459       | 0.00260709 | 0.0036217  | 1.12361287 |
| KRT10       | NM_000421.2 | KRT10       | 17 | Homo sapiens K10; KPP; KRC  | 0.0080993  | 0.00958889 | 1.123382   |
| ANXA5       | NM_001154.2 | ANXA5       | 4  | Homo sapiens PP4; ANX5; E   | 6.8166E-06 | 2.8305E-05 | 1.12328914 |
| LOC10013323 | XM_00171803 | LOC10013323 |    | PREDICTED: Homo sapiens h   | 0.00013983 | 0.00031362 | 1.12320868 |
| PSMD6       | NM_014814.1 | PSMD6       | 3  | Homo sapiens KIAA0107; S1   | 6.1566E-06 | 2.6121E-05 | 1.12318583 |
| CDC37       | NM_007065.3 | CDC37       | 19 | Homo sapiens P50CDC37       | 1.0828E-05 | 4.0462E-05 | 1.12313992 |
| CHMP5       | NM_016410.2 | CHMP5       | 9  | Homo sapiens C9orf83; SNF   | 6.5477E-05 | 0.00016917 | 1.12305958 |
| ZNF738      | XR_040185.1 | ZNF738      | 19 | PREDICTED: Homo sapiens n   | 0.00172424 | 0.00255333 | 1.1230468  |
| YRDC        | NM_024640.3 | YRDC        | 1  | Homo sapiens FLJ23476; IRI  | 0.00490674 | 0.00624753 | 1.12288989 |
| ANKRD19     | NM_00101092 | ANKRD19     |    | Homo sapiens FLJ36178; bA   | 0.01271056 | 0.01403328 | 1.12285789 |
| SEMA4D      | NM_006378.2 | SEMA4D      | 9  | Homo sapiens SEMAJ; M-ser   | 0.00830189 | 0.00980228 | 1.12281263 |
| SERBP1      | NM_00101806 | SERBP1      | 1  | Homo sapiens CGI-55; FLJ9   | 0.01001341 | 0.01148617 | 1.12267599 |
| LOC731542   | XR_015517.2 | LOC731542   |    | PREDICTED: Homo sapiens n   | 9.5337E-06 | 3.6544E-05 | 1.1224027  |
| LOC10013377 | XM_00171514 | LOC10013377 |    | PREDICTED: Homo sapiens s   | 0.00339204 | 0.00454239 | 1.12229509 |
| LOC728620   | XR_037241.1 | LOC728620   |    | PREDICTED: Homo sapiens n   | 0.00083526 | 0.00138067 | 1.12212316 |
| UBB         | NM_018955.2 | UBB         | 17 | Homo sapiens FLJ25987; MG   | 0.00027619 | 0.00054726 | 1.12210094 |
| IER5L       | NM_203434.1 | IER5L       | 9  | Homo sapiens MGC70833; b    | 0.03238698 | 0.03087054 | 1.12206228 |
| SPTLC1      | NM_178324.1 | SPTLC1      | 9  | Homo sapiens HSAN; HSAN1    | 0.00240677 | 0.00339119 | 1.12185244 |
| C13orf27    | NM_138779.2 | C13ORF27    | 13 | Homo sapiens chromosome 1   | 0.00232819 | 0.00329956 | 1.12175776 |
| FARSLB      | NM_005687.2 | FARSLB      | 2  | Homo sapiens PheHB; FR      | 0.0370519  | 0.03456602 | 1.12126659 |
| C8orf76     | NM_032847.1 | C8ORF76     | 8  | Homo sapiens MGC9784; FLJ   | 0.00014043 | 0.0003148  | 1.12111281 |
| LOC400721   | XM_930560.1 | LOC400721   |    | PREDICTED: Homo sapiens s   | 0.00045767 | 0.00083432 | 1.12108507 |
| COX7C       | NM_001867.2 | COX7C       | 5  | Homo sapiens cytochrome c   | 5.8321E-05 | 0.00015385 | 1.12067143 |
| TRAPPC3     | NM_014408.3 | TRAPPC3     | 1  | Homo sapiens BET3           | 0.00056294 | 0.00099602 | 1.12066742 |
| DENR        | NM_003677.3 | DENR        | 12 | Homo sapiens DRP; DRP1; S   | 0.00017735 | 0.00038065 | 1.12046589 |
| TXNDC17     | NM_032731.2 | TXNDC17     | 17 | Homo sapiens TRP14; MGC1    | 3.7443E-06 | 1.7972E-05 | 1.1202887  |
| PSMF1       | NM_178579.1 | PSMF1       | 20 | Homo sapiens PI31           | 0.01089459 | 0.01233726 | 1.12016929 |
| LASS6       | NM_203463.1 | LASS6       | 2  | Homo sapiens CerS6; MGC1    | 4.7041E-05 | 0.00013004 | 1.11980525 |
| XPNPEP3     | NM_022098.2 | XPNPEP3     | 22 | Homo sapiens APP3           | 0.00012413 | 0.00028489 | 1.11972845 |
| RAB3IP      | NM_175624.1 | RAB3IP      | 12 | Homo sapiens MGC71495; R    | 0.00197121 | 0.00285828 | 1.11958352 |
| ZFYVE21     | NM_024071.2 | ZFYVE21     | 14 | Homo sapiens MGC2550        | 0.00148425 | 0.00224919 | 1.11942552 |
| NUBPL       | NM_025152.1 | NUBPL       | 14 | Homo sapiens FLJ12660; C1   | 0.01085678 | 0.0123008  | 1.1193006  |
| C2orf30     | NM_015701.2 | C2ORF30     | 2  | Homo sapiens CL24936; CL2   | 0.01512089 | 0.01624274 | 1.11916308 |
| SURF4       | NM_033161.2 | SURF4       | 9  | Homo sapiens FLJ22993; ER   | 0.0017106  | 0.00253528 | 1.11915802 |
| LOC10013317 | XR_036907.1 | LOC10013317 |    | PREDICTED: Homo sapiens n   | 0.00015096 | 0.00033373 | 1.11901526 |
| COX6C       | NM_004374.2 | COX6C       | 8  | Homo sapiens cytochrome c   | 0.00035535 | 0.00067677 | 1.11891485 |
| TALDO1      | XM_938697.1 | TALDO1      |    | PREDICTED: Homo sapiens t   | 4.4377E-05 | 0.00012388 | 1.11859171 |
| RTN3        | NM_201428.1 | RTN3        | 11 | Homo sapiens NSPLII; NSPL   | 0.03592402 | 0.03368213 | 1.11855829 |
| CFD         | NM_001928.2 | CFD         | 19 | Homo sapiens DF; ADN; PFD   | 2.3551E-05 | 7.4868E-05 | 1.11796741 |
| RGS2        | NM_002923.1 | RGS2        | 1  | Homo sapiens G0S8           | 0.00937587 | 0.01088002 | 1.11773147 |
| MSRB2       | NM_012228.2 | MSRB2       | 10 | Homo sapiens CBS-1; PILB; I | 0.00586038 | 0.00728211 | 1.11729528 |
| MCART1      | NM_033412.1 | MCART1      | 9  | Homo sapiens CG7943; MGC    | 0.00277779 | 0.00382071 | 1.11712609 |
| CDKN1A      | NM_078467.1 | CDKN1A      | 6  | Homo sapiens P21; MDA-6; S  | 0.00033915 | 0.00065186 | 1.11697888 |
| MGC71993    | NM_00100433 | MGC71993    |    | Homo sapiens similar to DNA | 0.00060328 | 0.0010517  | 1.11651979 |
| RAB5B       | NM_002868.2 | RAB5B       | 12 | Homo sapiens RAB5B, memb    | 0.00058344 | 0.00102443 | 1.11643168 |
| RBM6        | NM_005777.1 | RBM6        | 3  | Homo sapiens FLJ36517; DE   | 0.02260644 | 0.02291197 | 1.11610318 |
| UBE2E2      | NM_152653.1 | UBE2E2      | 3  | Homo sapiens UBCH8; FLJ25   | 0.05200548 | 0.04578068 | 1.11604889 |
| POLB        | NM_002690.1 | POLB        | 8  | Homo sapiens MGC125976      | 0.00071426 | 0.00120866 | 1.11600335 |
| DUXAP3      | NR_002220.1 | DUXAP3      | 10 | Homo sapiens double homeo   | 0.00034517 | 0.00066068 | 1.1157816  |
| LOC652864   | XM_942571.1 | LOC652864   |    | PREDICTED: Homo sapiens s   | 0.01553756 | 0.01661101 | 1.11573407 |
| CREB1       | NM_134442.2 | CREB1       | 2  | Homo sapiens MGC9284; CR    | 7.5806E-05 | 0.00019085 | 1.11555472 |
| TUBB6       | XM_940079.1 | TUBB6       |    | PREDICTED: Homo sapiens t   | 0.00898341 | 0.01048702 | 1.11554185 |
| IFI27L2     | NM_032036.2 | IFI27L2     | 14 | Homo sapiens TLH29; MGC4    | 0.02870237 | 0.02794746 | 1.11549446 |
| MRLC2       | NM_033546.2 | MRLC2       | 18 | Homo sapiens MLC-B          | 9.6919E-06 | 3.7069E-05 | 1.11530329 |
| HSBP1       | NM_001537.2 | HSBP1       | 16 | Homo sapiens DKFZp686D16    | 0.00013448 | 0.00030349 | 1.115177   |
| SLC16A12    | NM_213606.1 | SLC16A12    | 10 | Homo sapiens MCT12; DKFZ    | 0.00176998 | 0.00261137 | 1.11498754 |
| JUND        | NM_005354.2 | JUND        | 19 | Homo sapiens jun D proto-or | 3.4817E-05 | 0.0001023  | 1.11482803 |
| COX4NB      | NM_006067.3 | COX4NB      | 16 | Homo sapiens NOC4; C16orf   | 0.02983772 | 0.02887033 | 1.1148183  |
| LOC440704   | XM_944716.1 | LOC440704   |    | PREDICTED: Homo sapiens h   | 0.00754788 | 0.0090225  | 1.11404526 |
| TXNDC12     | NM_015913.2 | TXNDC12     | 1  | Homo sapiens AGR1; ERP19;   | 0.00011452 | 0.00026681 | 1.11401862 |
| SLC35B2     | NM_178148.1 | SLC35B2     | 6  | Homo sapiens UGTrel4; SLL;  | 0.00174902 | 0.0025848  | 1.1137294  |
| FN3KRP      | NM_024619.2 | FN3KRP      | 17 | Homo sapiens FLJ12171       | 0.00042998 | 0.00079407 | 1.11369181 |
| ATOX1       | NM_004045.3 | ATOX1       | 5  | Homo sapiens MGC138453; I   | 0.00117118 | 0.00184124 | 1.11356016 |
| PTRH2       | NM_016077.3 | PTRH2       | 17 | Homo sapiens CGI-147; FLJ3  | 0.00023404 | 0.00047854 | 1.11284607 |

5.0 Upreg

|             |                          |   |                                |            |            |            |
|-------------|--------------------------|---|--------------------------------|------------|------------|------------|
| POP5        | NM_198201.1 POP5         |   | 12 Homo sapiens HSPC004; RPF   | 0.01977894 | 0.02042613 | 1.11264699 |
| VPS37C      | NM_017966.4 VPS37C       |   | 11 Homo sapiens FLJ20847       | 0.00084288 | 0.00139012 | 1.11255558 |
| C5orf21     | NM_032042.3 C5ORF21      |   | 5 Homo sapiens DKFZP564D17     | 0.03930803 | 0.03631554 | 1.11238875 |
| PHF13       | NM_153812.1 PHF13        |   | 1 Homo sapiens SPOC1; PHF5;    | 0.00183474 | 0.00269198 | 1.11207306 |
| AHR         | NM_001621.2 AHR          |   | 7 Homo sapiens aryl hydrocarb  | 0.00078173 | 0.00130696 | 1.1116934  |
| CDAN1       | NM_138477.2 CDAN1        |   | PREDICTED: Homo sapiens c      | 0.00034479 | 0.00066023 | 1.11131315 |
| COMMD6      | NM_203497.1 COMMD6       |   | 13 Homo sapiens Acrg           | 3.194E-05  | 9.4901E-05 | 1.11107678 |
| PNPT1       | NM_033109.2 PNPT1        |   | 2 Homo sapiens DKFZp762K19     | 0.00062491 | 0.00108316 | 1.11098865 |
| FAHD2B      | NM_199336.1 FAHD2B       |   | 2 Homo sapiens DKFZp434N06     | 0.02478405 | 0.02480667 | 1.11094694 |
| NDUFA8      | NM_014222.2 NDUFA8       |   | 9 Homo sapiens CI-19KD; PGI\   | 1.9249E-05 | 6.4046E-05 | 1.11054453 |
| KLF13       | NM_015995.2 KLF13        |   | 15 Homo sapiens NSLP1; FKLF2   | 0.00453603 | 0.00583479 | 1.11008966 |
| ANKRD30B    | NM_00102986 ANKRD30B     |   | 18 Homo sapiens NYH-BR-1.1     | 0.00072797 | 0.00122901 | 1.11001413 |
| FADD        | NM_003824.2 FADD         |   | 11 Homo sapiens GIG3; MORT1;   | 0.00311323 | 0.00421666 | 1.1098309  |
| AAGAB       | NM_024666.3 AAGAB        |   | 15 Homo sapiens DKFZp686G08    | 0.05541633 | 0.04833229 | 1.10951725 |
| SCARNA13    | NR_003002.1 SCARNA13     |   | 14 Homo sapiens U93            | 0.01726542 | 0.01820536 | 1.10925117 |
| MUL1        | NM_024544.2 MUL1         |   | 1 Homo sapiens mitochondrial   | 0.00242711 | 0.00341328 | 1.10916414 |
| LOC644250   | XM_929199.1 LOC644250    |   | 13 PREDICTED: Homo sapiens h   | 0.00109146 | 0.00173236 | 1.1087267  |
| TBCB        | NM_001281.2 TBCB         |   | 19 Homo sapiens CG22; MGC14    | 0.0006373  | 0.00110051 | 1.10870219 |
| FKBP1A      | NM_000801.2 FKBP1A       |   | 20 Homo sapiens PKC12; FKBP1.  | 0.00382538 | 0.00504796 | 1.1078303  |
| MYL12A      | NM_006471.2 MYL12A       |   | 18 Homo sapiens MLCB; MRLC3    | 6.2958E-05 | 0.0016367  | 1.10777641 |
| NDUFB3      | NM_002491.1 NDUFB3       |   | 2 Homo sapiens B12             | 1.6756E-05 | 5.7495E-05 | 1.10774051 |
| OCIAD2      | NM_152398.2 OCIAD2       |   | 4 Homo sapiens DKFZp686C03     | 0.00020089 | 0.00042117 | 1.10759784 |
| LMTK3       | XM_936372.1 LMTK3        |   | PREDICTED: Homo sapiens k      | 8.0604E-05 | 0.00020103 | 1.10737467 |
| C9orf80     | NM_021218.1 C9ORF80      |   | 9 Homo sapiens HSPC043; RP1    | 0.00524175 | 0.00661362 | 1.10735113 |
| ZFYVE20     | NM_022340.2 ZFYVE20      |   | 3 Homo sapiens MGC126210; I    | 0.01178941 | 0.01318214 | 1.10702653 |
| HMGCS1      | NM_002130.4 HMGCS1       |   | 5 Homo sapiens MGC90332; H     | 0.00700949 | 0.00846775 | 1.10611244 |
| CCDC23      | NM_199342.1 CCDC23       |   | 1 Homo sapiens coiled-coil don | 0.00084913 | 0.00139832 | 1.10583268 |
| ZNF786      | NM_152411.1 ZNF786       |   | 7 Homo sapiens DKFZp762I13;    | 0.03280965 | 0.03117858 | 1.10567903 |
| SFRS17A     | NM_005088.2 SFRS17A      | Y | Homo sapiens CXYorf3; DXY      | 0.0019047  | 0.00277836 | 1.10552622 |
| COX4I1      | NM_001861.2 COX4I1       |   | 16 Homo sapiens MGC72016; C    | 5.5114E-05 | 0.00014775 | 1.10542464 |
| ID1         | NM_181353.1 ID1          |   | 20 Homo sapiens ID             | 4.2989E-05 | 0.00012062 | 1.10505482 |
| HES4        | NM_021170.2 HES4         |   | 1 Homo sapiens hairy and enh;  | 0.00019888 | 0.00041786 | 1.10487575 |
| ALKBH2      | NM_00100165 ALKBH2       |   | 12 Homo sapiens ABH2; MGC90    | 0.05710216 | 0.04955142 | 1.10482813 |
| UBA1        | NM_003334.3 UBA1         | X | Homo sapiens UBA1A; A1S9;      | 7.7837E-05 | 0.00019524 | 1.10479809 |
| CDK5RAP3    | NM_176096.1 CDK5RAP3     |   | 17 Homo sapiens MST016; LZAF   | 0.00016925 | 0.0003664  | 1.10432284 |
| LOC643509   | XM_928156.1 LOC643509    |   | 18 PREDICTED: Homo sapiens s   | 7.1474E-05 | 0.00018198 | 1.10397062 |
| LOC642947   | NM_00103989 LOC642947    |   | 9 Homo sapiens hypothetical p  | 0.00033554 | 0.00064575 | 1.10374756 |
| PSMD4       | NM_153822.1 PSMD4        |   | 1 Homo sapiens pUB-R5; Rpn1    | 0.00087709 | 0.00143735 | 1.10355582 |
| LOC10013415 | XM_00171826 LOC100134159 |   | PREDICTED: Homo sapiens s      | 0.00115489 | 0.00181889 | 1.10336178 |
| NSF         | XM_938198.1 NSF          |   | PREDICTED: Homo sapiens N      | 0.03043338 | 0.02934635 | 1.10332912 |
| SLC44A4     | NM_025257.1 SLC44A4      |   | 6 Homo sapiens FLJ14491; NG    | 0.00022233 | 0.00045739 | 1.10331014 |
| TBCD        | NM_005993.3 TBCD         |   | 17 Homo sapiens KIAA0988       | 0.0473132  | 0.04239008 | 1.10310431 |
| AGAP8       | NM_00107768 AGAP8        |   | 10 Homo sapiens ArfGAP with G  | 0.02544204 | 0.02532371 | 1.10289084 |
| LOC10013272 | XM_00172332 LOC10013272  |   | 15 PREDICTED: Homo sapiens h   | 0.00099694 | 0.00160381 | 1.10280504 |
| CNIH        | NM_005776.2 CNIH         |   | 14 Homo sapiens CNIH1; CNIL;   | 0.00046133 | 0.0008403  | 1.10271949 |
| SHCBP1      | NM_024745.2 SHCBP1       |   | 16 Homo sapiens MGC26900; Fl   | 0.00044549 | 0.00081619 | 1.10265505 |
| PPM1D       | NM_003620.2 PPM1D        |   | 17 Homo sapiens PP2C-DELTA; \  | 0.04909467 | 0.04368728 | 1.10262771 |
| MMGT1       | XM_932381.1 MMGT1        | X | Homo sapiens membrane ma       | 0.00233033 | 0.00330152 | 1.10240617 |
| GTF2A2      | NM_004492.1 GTF2A2       |   | 15 Homo sapiens TF2A2; HsT18   | 8.8035E-05 | 0.00021655 | 1.10207998 |
| ZNF512      | NM_032434.2 ZNF512       |   | 2 Homo sapiens MGC111046; I    | 0.01736788 | 0.0183046  | 1.10137736 |
| C8orf37     | NM_177965.2 C8ORF37      |   | 8 Homo sapiens FLJ30600        | 0.0031677  | 0.00428448 | 1.10129984 |
| TRAPPC1     | NM_021210.2 TRAPPC1      |   | 17 Homo sapiens BET5; MUM2     | 0.01077163 | 0.01221378 | 1.10105669 |
| MCM8        | NM_182802.1 MCM8         |   | 20 Homo sapiens MGC4816; C2    | 0.00014772 | 0.00032787 | 1.10078728 |
| LOC441087   | NM_00101371 LOC441087    |   | 5 Homo sapiens hypothetical g  | 0.02339963 | 0.0236231  | 1.10043033 |
| SDHAP2      | NR_003265.3 SDHAP2       |   | 3 Homo sapiens succinate dehy  | 0.00871884 | 0.01021487 | 1.10008288 |
| HIBCH       | NM_014362.2 HIBCH        |   | 2 Homo sapiens HIBYL-COA-H     | 0.00856976 | 0.01007113 | 1.09952977 |
| NKTR        | NM_00101265 NKTR         |   | 3 Homo sapiens DKFZp686J06     | 0.04280654 | 0.03898936 | 1.09946494 |
| WASL        | NM_003941.2 WASL         |   | 7 Homo sapiens DKFZp779G08     | 0.02143434 | 0.02188837 | 1.09945973 |
| RUVBL2      | NM_006666.1 RUVBL2       |   | 19 Homo sapiens TIP49B; TIP48  | 0.01201251 | 0.01338725 | 1.09939896 |
| COMMD3      | NM_012071.2 COMMD3       |   | 10 Homo sapiens C10orf8; DKFz  | 0.00028816 | 0.00056803 | 1.09937994 |
| MRPL36      | NM_032479.2 MRPL36       |   | 5 Homo sapiens MGC104245; I    | 0.00026567 | 0.00053121 | 1.09924903 |
| ACTR1A      | NM_005736.2 ACTR1A       |   | 10 Homo sapiens ARP1           | 0.00455186 | 0.00585259 | 1.09920737 |
| ARMC1       | NM_018120.3 ARMC1        |   | 8 Homo sapiens FLJ10511; Arc   | 0.00361226 | 0.00479485 | 1.09909874 |
| USP49       | NM_018561.3 USP49        |   | 6 Homo sapiens MGC20741        | 0.01388055 | 0.01510829 | 1.0988124  |
| CHP         | NM_007236.3 CHP          |   | 15 Homo sapiens SLC9A1BP       | 0.00038542 | 0.00072537 | 1.09858176 |
| ZFP36       | NM_003407.1 ZFP36        |   | 19 Homo sapiens NRP475; GOS;   | 0.00090075 | 0.00147037 | 1.09853765 |
| POLR2H      | NM_006232.2 POLR2H       |   | 3 Homo sapiens RPB17; hsRPB    | 2.2334E-05 | 7.1779E-05 | 1.09851679 |
| SNF8        | NM_007241.2 SNF8         |   | 17 Homo sapiens VPS22; EAP30   | 0.02345429 | 0.02367011 | 1.09842851 |
| BAT2D1      | NM_015172.2 BAT2D1       |   | 1 Homo sapiens BAT2-iso; XTP   | 0.00366015 | 0.00484961 | 1.09797502 |
| BSDC1       | NM_018045.4 BSDC1        |   | 1 Homo sapiens RP4-811H24.7    | 0.01493798 | 0.01606593 | 1.09786044 |

5.0 Upreg

|             |             |             |    |              |                              |            |            |            |
|-------------|-------------|-------------|----|--------------|------------------------------|------------|------------|------------|
| ATG16L1     | NM_017974.3 | ATG16L1     | 2  | Homo sapiens | ATG16L1; APG1                | 0.00683054 | 0.00828924 | 1.09731174 |
| C5orf28     | NM_022483.3 | C5ORF28     | 5  | Homo sapiens | MGC90226; M                  | 0.03961852 | 0.03656005 | 1.09723371 |
| RAB11A      | NM_004663.3 | RAB11A      | 15 | Homo sapiens | MGC1490; YL1                 | 0.00438755 | 0.0056654  | 1.09699024 |
| ARHGEF3     | NM_019555.1 | ARHGEF3     | 3  | Homo sapiens | DKFZP434F24                  | 0.00964181 | 0.01112682 | 1.09673765 |
| ATP6V0E1    | NM_003945.3 | ATP6V0E1    | 5  | Homo sapiens | Vma21p; ATP6                 | 0.00135943 | 0.00208854 | 1.09651346 |
| AKR1D1      | NM_005989.2 | AKR1D1      | 7  | Homo sapiens | 3o5bred; SRD                 | 0.00123037 | 0.00192052 | 1.09645043 |
| LOC399748   | XR_018212.1 | LOC399748   |    |              | PREDICTED: Homo sapiens n    | 0.0018607  | 0.00272278 | 1.09612695 |
| NMRAL1      | NM_020677.2 | NMRAL1      | 16 | Homo sapiens | FLJ25918; HS                 | 0.00721392 | 0.00868362 | 1.096059   |
| FKTN        | NM_006731.2 | FKTN        | 9  | Homo sapiens | MGC126857; I                 | 5.6866E-05 | 0.00015129 | 1.09586943 |
| DDX1        | NM_004939.1 | DDX1        | 2  | Homo sapiens | UKVH5d; DBP                  | 9.594E-05  | 0.00023196 | 1.09576593 |
| PSMD1       | NM_002807.2 | PSMD1       | 2  | Homo sapiens | S1; MGC1330                  | 0.00074496 | 0.00125409 | 1.09575253 |
| MAGEB2      | NM_002364.3 | MAGEB2      |    |              | Homo sapiens MAGE-XP-2; M    | 0.00029194 | 0.00057433 | 1.09567458 |
| BOLA2       | NM_00103182 | BOLA2       | 16 | Homo sapiens | BOLA2A; Myo                  | 0.00165897 | 0.00246875 | 1.09566939 |
| LOC729090   | XR_015449.2 | LOC729090   | 5  |              | PREDICTED: Homo sapiens s    | 0.00032016 | 0.00062039 | 1.09542656 |
| DEF8        | NM_207514.1 | DEF8        | 16 | Homo sapiens | MGC104349                    | 0.00079372 | 0.00132323 | 1.09533559 |
| RIC8A       | NM_021932.4 | RIC8A       | 11 | Homo sapiens | synembryn; M                 | 0.03090583 | 0.02969423 | 1.09502529 |
| ALKBH5      | NM_017758.2 | ALKBH5      | 17 | Homo sapiens | OFOX1; OFO                   | 5.6325E-05 | 0.00015026 | 1.09501707 |
| NDUFA4      | NM_002489.2 | NDUFA4      | 7  | Homo sapiens | FLJ27440; MG                 | 9.4691E-05 | 0.00022963 | 1.09489463 |
| AARSD1      | NM_025267.2 | AARSD1      | 17 | Homo sapiens | MGC2744                      | 0.04704566 | 0.04218052 | 1.09489146 |
| TMEM93      | NM_00101476 | TMEM93      | 17 | Homo sapiens | MGC2963                      | 0.00091895 | 0.00149507 | 1.09466159 |
| LILRB3      | NM_006864.1 | LILRB3      | 19 | Homo sapiens | LIR-3; MGC13                 | 2.1009E-05 | 6.8651E-05 | 1.0942907  |
| EPN1        | NM_013333.2 | EPN1        | 19 | Homo sapiens | epsin 1 (EPN1                | 0.00071837 | 0.00121444 | 1.09412085 |
| MRPL17      | NM_022061.2 | MRPL17      | 11 | Homo sapiens | RPML26; MRP                  | 0.0012575  | 0.00195556 | 1.09384871 |
| LOC10012806 | XR_037874.1 | LOC10012806 |    |              | PREDICTED: Homo sapiens n    | 0.00269707 | 0.00372488 | 1.09377611 |
| TTC4        | NM_004623.2 | TTC4        | 1  | Homo sapiens | MGC5097                      | 0.00144317 | 0.00219718 | 1.09373783 |
| UBAC2       | NM_177967.2 | UBAC2       | 13 | Homo sapiens | FLJ30548; MG                 | 0.00938312 | 0.010887   | 1.09372281 |
| LLGL1       | NM_004140.3 | LLGL1       | 17 | Homo sapiens | HUGL; LLGL; I                | 0.04019182 | 0.03696855 | 1.09368457 |
| ATP5J       | NM_00100370 | ATP5J       | 21 | Homo sapiens | ATP5A; CF6; F                | 3.0155E-05 | 9.0455E-05 | 1.09362709 |
| TUBB2C      | NM_006088.5 | TUBB2C      | 9  | Homo sapiens | TUBB2                        | 0.00016663 | 0.00036153 | 1.09341158 |
| SEC61G      | NM_014302.3 | SEC61G      | 7  | Homo sapiens | SSS1                         | 1.0936E-05 | 4.0831E-05 | 1.09334624 |
| ENY2        | NM_020189.4 | ENY2        | 8  | Homo sapiens | DC6; FLJ2048                 | 0.00013105 | 0.00029751 | 1.09310992 |
| GPD1L       | NM_015141.2 | GPD1L       | 3  | Homo sapiens | KIAA0089                     | 0.00797351 | 0.00945912 | 1.09310306 |
| SAP3        | NM_018312.3 | SAP3        | 11 | Homo sapiens | MGC125712; S                 | 0.00267273 | 0.00370057 | 1.09254126 |
| RAB10       | NM_016131.2 | RAB10       | 2  | Homo sapiens | RAB10, memb                  | 0.00032933 | 0.00063576 | 1.09170165 |
| MRPL33      | NM_004891.2 | MRPL33      | 2  | Homo sapiens | C2orf1; RPL33                | 9.8866E-05 | 0.00023772 | 1.09150429 |
| LOC10013016 | XM_00171912 | LOC10013016 |    |              | PREDICTED: Homo sapiens h    | 0.00635632 | 0.00780223 | 1.09148955 |
| C16orf80    | NM_013242.2 | C16ORF80    | 16 | Homo sapiens | EVORF; GTL3                  | 0.02833052 | 0.02764676 | 1.09148331 |
| CBWD5       | NM_00102491 | CBWD5       | 9  | Homo sapiens | FLJ40320; DC                 | 0.03900532 | 0.03607766 | 1.09145096 |
| DUSP23      | NM_017823.3 | DUSP23      | 1  | Homo sapiens | MOSP; FLJ204                 | 0.00185248 | 0.00271166 | 1.09128163 |
| PDCD6       | NM_013232.2 | PDCD6       | 5  | Homo sapiens | ALG-2; MGC1                  | 0.00040467 | 0.0007556  | 1.09059106 |
| LOC727808   | XR_041978.1 | LOC727808   |    |              | PREDICTED: Homo sapiens h    | 0.04961141 | 0.04403991 | 1.09008027 |
| FAT1        | NM_005245.3 | FAT1        | 4  | Homo sapiens | ME5; hFat1; C                | 4.9E-05    | 0.00013435 | 1.09002825 |
| PPM1G       | NM_002707.3 | PPM1G       | 2  | Homo sapiens | MGC2870; PP                  | 0.0009161  | 0.00149125 | 1.08989211 |
| DNAJB6      | NM_005494.2 | DNAJB6      | 7  | Homo sapiens | DKFZp566D08                  | 0.00403707 | 0.00529308 | 1.08979997 |
| ARPC4       | NM_005718.3 | ARPC4       | 3  | Homo sapiens | ARC20; p20-A                 | 0.03075437 | 0.02957138 | 1.0897889  |
| GNL2        | NM_013285.1 | GNL2        | 1  | Homo sapiens | dJ423B22.6; N                | 0.00148855 | 0.00225415 | 1.08970118 |
| SPRED1      | NM_152594.1 | SPRED1      | 15 | Homo sapiens | NFLS; FLJ339                 | 0.01213492 | 0.01350308 | 1.08929705 |
| SPSB3       | NM_080861.3 | SPSB3       | 16 | Homo sapiens | SSB3; C16orf                 | 0.01347638 | 0.01474153 | 1.08909321 |
| HLA-E       | NM_005516.4 | HLA-E       | 6  | Homo sapiens | DKFZp686P19                  | 0.01628595 | 0.01730986 | 1.08890402 |
| ROCK2       | NM_004850.3 | ROCK2       | 2  | Homo sapiens | KIAA0619                     | 0.00010918 | 0.00025696 | 1.08880463 |
| PDE4C       | NM_000923.1 | PDE4C       | 19 | Homo sapiens | PDE4C-791; D                 | 0.00095965 | 0.00155121 | 1.08863908 |
| ITM2B       | NM_021999.2 | ITM2B       | 13 | Homo sapiens | E3-16; BRICD                 | 0.00324752 | 0.00437356 | 1.08820492 |
| ARL2        | NM_001667.1 | ARL2        | 11 | Homo sapiens | ARFL2                        | 0.00465854 | 0.00596963 | 1.08802391 |
| LRPPRC      | NM_133259.2 | LRPPRC      | 2  | Homo sapiens | GP130; CLON                  | 0.02833874 | 0.0276517  | 1.08786647 |
| LOC728533   | XR_015610.2 | LOC728533   | 19 |              | PREDICTED: Homo sapiens n    | 0.00283155 | 0.00388249 | 1.08731101 |
| GJC1        | NM_005497.2 | GJC1        | 17 | Homo sapiens | DKFZp686P07                  | 8.8128E-05 | 0.00021671 | 1.08729974 |
| RGS10       | NM_002925.3 | RGS10       | 10 | Homo sapiens | regulator of G               | 0.01128928 | 0.0127104  | 1.08705762 |
| MRPS17      | NM_015969.2 | MRPS17      | 7  | Homo sapiens | RPMS17; HSP                  | 0.00264091 | 0.00366171 | 1.08684067 |
| TMEM85      | NM_016454.2 | TMEM85      | 15 | Homo sapiens | PIG17; MGC2                  | 0.00032064 | 0.00062077 | 1.08679731 |
| BCKDK       | NM_005881.1 | BCKDK       | 16 | Homo sapiens | branched chai                | 0.00193602 | 0.00281656 | 1.08666781 |
| CST3        | NM_000099.2 | CST3        | 20 | Homo sapiens | MGC117328                    | 0.00044835 | 0.0008204  | 1.08654088 |
| TAF1C       | NM_139353.1 | TAF1C       | 16 | Homo sapiens | SL1; MGC:39                  | 0.00768298 | 0.00915779 | 1.08647776 |
| ARGLU1      | NM_018011.2 | ARGLU1      | 13 | Homo sapiens | FLJ10154; RP                 | 0.00141036 | 0.00215471 | 1.08639518 |
| ZNF223      | NM_013361.2 | ZNF223      |    |              | Homo sapiens zinc finger pro | 0.04315065 | 0.03924576 | 1.08635209 |
| TOMM20      | NM_014765.2 | TOMM20      | 1  | Homo sapiens | translocase of               | 0.00065926 | 0.00113043 | 1.08627    |
| CLTA        | NM_007096.1 | CLTA        | 9  | Homo sapiens | LCA                          | 0.00555911 | 0.00696198 | 1.08614245 |
| C7orf30     | NM_138446.1 | C7ORF30     | 7  | Homo sapiens | chromosome 7                 | 0.00080868 | 0.00134483 | 1.08595148 |
| RBCK1       | NM_006462.3 | RBCK1       |    |              | Homo sapiens XAP4; RNF54;    | 0.05554004 | 0.04842575 | 1.08594583 |
| RNF219      | NM_024546.3 | RNF219      | 13 | Homo sapiens | DKFZp686N15                  | 0.03867641 | 0.0358301  | 1.08593651 |
| PIR         | NM_00101810 | PIR         |    |              | Homo sapiens pirin (iron-bin | 0.00928935 | 0.01078676 | 1.0855741  |



### 5.0 Upreg

|             |             |               |    |                                    |            |            |            |
|-------------|-------------|---------------|----|------------------------------------|------------|------------|------------|
| TMEM69      | NM_016486.3 | TMEM69        | 1  | Homo sapiens C1orf154; MGC10013044 | 0.01196868 | 0.01334518 | 1.08554754 |
| BLZF1       | NM_003666.2 | BLZF1         | 1  | Homo sapiens JEM1; JEM-1;          | 0.00289959 | 0.003964   | 1.08534274 |
| GGCT        | NM_024051.2 | GGCT          | 7  | Homo sapiens FLJ11717; MG          | 0.00735183 | 0.00882903 | 1.08523626 |
| ZW10        | NM_004724.2 | ZW10          | 11 | Homo sapiens MGC149821; I          | 0.00493874 | 0.0062819  | 1.08508095 |
| STRAP       | NM_007178.2 | STRAP         | 12 | Homo sapiens MAWD; PT-WC           | 0.00019026 | 0.000404   | 1.08488865 |
| FLJ44124    | NM_00103975 | FLJ44124      | 7  | Homo sapiens FLJ26154              | 0.00509532 | 0.00645485 | 1.08482631 |
| C10orf58    | NM_032333.2 | C10ORF58      | 10 | Homo sapiens MGC4248               | 0.00178766 | 0.00263612 | 1.08457722 |
| RPL7L1      | NM_198486.2 | RPL7L1        | 6  | Homo sapiens MGC62004; d:          | 0.0012495  | 0.00194554 | 1.0844435  |
| FAM82A2     | NM_018145.1 | FAM82A2       | 15 | Homo sapiens ptpip51; RMD:         | 0.00731121 | 0.00878386 | 1.08432895 |
| SDHAF2      | NM_017841.1 | SDHAF2        | 11 | Homo sapiens FLJ20487              | 0.00365886 | 0.00484937 | 1.08422165 |
| EIF4A3      | NM_014740.2 | EIF4A3        | 17 | Homo sapiens eIF4AIII; MGC         | 0.00051955 | 0.00092898 | 1.08351345 |
| CISD1       | NM_018464.2 | CISD1         | 10 | Homo sapiens MGC10013044           | 0.00088714 | 0.00145139 | 1.08336326 |
| AMZ2        | NM_016627.4 | AMZ2          | 17 | Homo sapiens archaealysin fa       | 0.00339193 | 0.00454294 | 1.08270146 |
| LOC646567   | XM_940087.1 | LOC646567     | 1  | PREDICTED: Homo sapiens s          | 0.01385949 | 0.01508724 | 1.0821958  |
| C8orf59     | XM_929832.1 | C8ORF59       | 8  | Homo sapiens chromosome 8          | 5.2961E-05 | 0.00014298 | 1.08214098 |
| NDUFB9      | NM_005005.2 | NDUFB9        | 8  | Homo sapiens DKFZp566O17           | 9.0204E-05 | 0.00022052 | 1.08186831 |
| LAMP1       | NM_005561.2 | LAMP1         | 13 | Homo sapiens LGP120; LAMP          | 0.00023699 | 0.00048345 | 1.08182981 |
| KIAA0174    | NM_014761.2 | KIAA0174      | 16 | Homo sapiens MGC117220             | 0.0007916  | 0.00132044 | 1.08182532 |
| LOC10013044 | XM_00171506 | LOC100130445  |    | PREDICTED: Homo sapiens s          | 0.00546439 | 0.00685607 | 1.08179476 |
| SLC4A2      | NM_003040.2 | SLC4A2        | 7  | Homo sapiens HKB3; NBND3           | 0.03850494 | 0.03570895 | 1.08139429 |
| CSF2RA      | NM_172249.1 | CSF2RA        |    | Homo sapiens CSF2R; CSF2R          | 0.02646479 | 0.02619017 | 1.08111175 |
| SULT1A1     | NM_177534.1 | SULT1A1       | 16 | Homo sapiens HAST1/HAST2           | 0.03455263 | 0.03258084 | 1.08093845 |
| COX7A2L     | NM_004718.2 | COX7A2L       | 2  | Homo sapiens EB1; COX7RP;          | 0.00044433 | 0.00081423 | 1.08064597 |
| SEC61B      | NM_006808.2 | SEC61B        | 9  | Homo sapiens Sec61 beta su         | 0.00067534 | 0.00115303 | 1.08045342 |
| NDUFA3      | NM_004542.1 | NDUFA3        | 19 | Homo sapiens B9                    | 0.00070397 | 0.00119286 | 1.08040088 |
| ACO1        | NM_002197.1 | ACO1          | 9  | Homo sapiens IREBP; IRP1; I        | 0.00192437 | 0.00280333 | 1.08022122 |
| AP2S1       | NM_004069.3 | AP2S1         | 19 | Homo sapiens AP17; CLAPS2          | 8.0027E-05 | 0.00019976 | 1.08010909 |
| RPL11       | NM_000975.2 | RPL11         | 1  | Homo sapiens GIG34                 | 0.00051871 | 0.00092767 | 1.07994173 |
| CAB39       | NM_016289.2 | CAB39         | 2  | Homo sapiens FLJ22682; CG          | 0.00295803 | 0.00403259 | 1.07925975 |
| DCTN2       | NM_006400.3 | DCTN2         | 12 | Homo sapiens DCTN50; RBP:          | 0.00155828 | 0.00234035 | 1.07897203 |
| LOC653147   | XM_939231.1 | LOC653147     | 11 | Homo sapiens hCG1995786 (          | 0.0026884  | 0.00371523 | 1.07858042 |
| LOC401397   | Hs.117929   | LOC401397     | 7  | PREDICTED: Homo sapiens h          | 0.00080751 | 0.0013434  | 1.07848126 |
| G3BP2       | NM_012297.3 | G3BP2         | 4  | Homo sapiens GTPase activa         | 0.02757434 | 0.02706536 | 1.07844198 |
| EZR         | NM_003379.4 | EZR           | 6  | Homo sapiens VIL2; MGC158          | 0.01750181 | 0.01841258 | 1.07763671 |
| PDHA1       | NM_000284.1 | PDHA1         |    | Homo sapiens PDHCE1A; PDI          | 0.00213246 | 0.00306322 | 1.07760446 |
| HNRNPA0     | NM_006805.3 | HNRNPA0       | 5  | Homo sapiens hnrNPA0               | 0.02082607 | 0.02134672 | 1.07736997 |
| GMD5        | NM_001500.2 | GMD5          | 6  | Homo sapiens GMD                   | 0.00480159 | 0.00612877 | 1.07691483 |
| LOC10013239 | XM_00171380 | LOC10013239 X |    | PREDICTED: Homo sapiens h          | 0.00835963 | 0.00985985 | 1.07652762 |
| C14orf173   | NM_022489.2 | C14ORF173     | 14 | Homo sapiens DKFZp762A02           | 0.04824192 | 0.04309015 | 1.07606595 |
| SLC2A1      | NM_006516.1 | SLC2A1        | 1  | Homo sapiens MGC141895; I          | 0.00042714 | 0.00078967 | 1.07595558 |
| RPL38       | NM_00103525 | RPL38         | 17 | Homo sapiens ribosomal prot        | 0.00062823 | 0.00108719 | 1.07572222 |
| LOC728877   | XR_041759.1 | LOC728877     | 22 | PREDICTED: Homo sapiens n          | 0.009791   | 0.01127082 | 1.07524241 |
| FAM115A     | NM_014719.1 | FAM115A       | 7  | Homo sapiens KIAA0738              | 0.00016311 | 0.00035617 | 1.07497891 |
| CCDC24      | NM_152499.1 | CCDC24        | 1  | Homo sapiens RP5-1198O20.          | 0.04319872 | 0.03927726 | 1.0744768  |
| SAFB2       | NM_014649.1 | SAFB2         | 19 | Homo sapiens KIAA0138              | 0.00789061 | 0.00937217 | 1.07421357 |
| FAF2        | NM_014613.1 | FAF2          | 5  | Homo sapiens ETEA; KIAA08          | 0.00620529 | 0.00765863 | 1.07419382 |
| ATP5C1      | NM_005174.2 | ATP5C1        | 10 | Homo sapiens ATP5CL1; ATP:         | 0.00116308 | 0.00183079 | 1.0737724  |
| RPA3        | NM_002947.3 | RPA3          | 7  | Homo sapiens REPA3                 | 0.00308394 | 0.00418408 | 1.07362934 |
| COX7A2      | NM_001865.2 | COX7A2        | 6  | Homo sapiens MGC118950; I          | 0.00066744 | 0.00114154 | 1.07340462 |
| ALDH7A1     | XM_937964.1 | ALDH7A1       | 5  | Homo sapiens ATP1; PDE; EI         | 0.00488309 | 0.00622103 | 1.07321284 |
| BRMS1       | NM_015399.3 | BRMS1         | 11 | Homo sapiens DKFZp564A06           | 0.00423925 | 0.00550957 | 1.07262837 |
| TIPARP      | NM_015508.2 | TIPARP        | 3  | Homo sapiens PARP-7; PARP:         | 0.0193528  | 0.02003321 | 1.07261926 |
| ZNF430      | NM_025189.2 | ZNF430        | 19 | Homo sapiens MGC133232; I          | 0.02044201 | 0.02099968 | 1.07260951 |
| CTSL1       | NM_145918.2 | CTSL1         | 9  | Homo sapiens MEP; CATL; FL         | 0.01148668 | 0.01289954 | 1.07225665 |
| FEZ2        | NM_005102.2 | FEZ2          | 2  | Homo sapiens MGC117372; I          | 0.01250333 | 0.01383931 | 1.07178007 |
| PDCD7       | NM_005707.1 | PDCD7         | 15 | Homo sapiens HES18; ES18;          | 0.01145731 | 0.01287315 | 1.07156835 |
| KIAA0196    | NM_014846.2 | KIAA0196      | 8  | Homo sapiens SPG8; MGC11           | 0.0450333  | 0.04070487 | 1.07131203 |
| SOX9        | NM_000346.2 | SOX9          | 17 | Homo sapiens CMPD1; CMD1           | 0.01016669 | 0.01163309 | 1.07128901 |
| H3F3B       | NM_005324.3 | H3F3B         | 17 | Homo sapiens H3F3A; H3.3B          | 0.00322023 | 0.00434348 | 1.07095189 |
| C20orf24    | NM_199485.1 | C20ORF24      | 20 | Homo sapiens PNAS-11; RIP:         | 0.00026821 | 0.00053484 | 1.07087269 |
| COPS7B      | NM_022730.1 | COPS7B        | 2  | Homo sapiens FLJ12612; MG          | 0.02431945 | 0.02441964 | 1.07084079 |
| EML4        | NM_019063.2 | EML4          | 2  | Homo sapiens FLJ10942; C2:         | 0.00888633 | 0.0103889  | 1.07069934 |
| UQCRCQ      | NM_014402.2 | UQCRCQ        | 5  | Homo sapiens QP-C; QCR8            | 0.0005278  | 0.00094201 | 1.07060928 |
| AMY1C       | NM_00100821 | AMY1C         | 1  | Homo sapiens AMY1                  | 0.03825907 | 0.03551847 | 1.07046934 |
| PPP2R2A     | NM_002717.2 | PPP2R2A       | 8  | Homo sapiens MGC52248; FI          | 0.02690215 | 0.02652725 | 1.07033132 |
| EXOSC9      | NM_00103419 | EXOSC9        | 4  | Homo sapiens p5; PMSCL1; f         | 0.01149565 | 0.01290632 | 1.0703043  |
| COQ5        | NM_032314.2 | COQ5          | 12 | Homo sapiens MGC4767; MG           | 0.00503719 | 0.00639044 | 1.07008328 |
| PPP6C       | NM_002721.3 | PPP6C         | 9  | Homo sapiens protein phospl        | 0.00370057 | 0.00489948 | 1.06999732 |
| SSNA1       | NM_003731.1 | SSNA1         | 9  | Homo sapiens NA14; NA-14;          | 0.02496766 | 0.02495344 | 1.06982181 |
| OCIAD1      | NM_017830.1 | OCIAD1        | 4  | Homo sapiens TPA018; MGC:          | 0.00244322 | 0.00343209 | 1.0695396  |

## 5.0 Upreg

|             |                         |   |                                 |            |            |            |
|-------------|-------------------------|---|---------------------------------|------------|------------|------------|
| CRKL        | NM_005207.2 CRKL        |   | 22 Homo sapiens v-crk sarcoma   | 0.01009249 | 0.01155874 | 1.06922693 |
| LY6E        | NM_002346.1 LY6E        |   | 8 Homo sapiens TSA-1; RIGE;     | 0.00286653 | 0.00392492 | 1.06800466 |
| MANBAL      | NM_022077.3 MANBAL      |   | 20 Homo sapiens mannosidase,    | 0.01964107 | 0.02029809 | 1.06779381 |
| PLEKHM2     | XM_290944.4 PLEKHM2     |   | 1 Homo sapiens SKIP; RP11-1f    | 0.02474312 | 0.02478549 | 1.06778595 |
| LTA4H       | NM_000895.1 LTA4H       |   | 12 Homo sapiens leukotriene A4  | 0.00714809 | 0.00861501 | 1.06735851 |
| LOC402175   | XR_038253.1 LOC402175   |   | PREDICTED: Homo sapiens n       | 0.00080734 | 0.00134337 | 1.06712325 |
| UBA52       | NM_003333.2 UBA52       |   | 19 Homo sapiens CEP52; HUBC     | 0.00095662 | 0.00154718 | 1.0670107  |
| WBP5        | NM_00100661.1 WBP5      | X | Homo sapiens DKFZp313K19        | 0.00417981 | 0.00544685 | 1.06657482 |
| PSMD2       | NM_002808.3 PSMD2       |   | 3 Homo sapiens MGC14274; S      | 0.00117047 | 0.00184078 | 1.06643537 |
| EMD         | NM_000117.1 EMD         | X | Homo sapiens STA; EDMD          | 0.00574917 | 0.00716218 | 1.06632817 |
| TCEB1       | NM_005648.2 TCEB1       |   | 8 Homo sapiens SIII             | 0.00180446 | 0.00265465 | 1.06632187 |
| C2orf69     | NM_153689.5 C2ORF69     |   | 2 Homo sapiens chromosome 2     | 0.00901845 | 0.01052093 | 1.0662217  |
| CD81        | NM_004356.3 CD81        |   | 11 Homo sapiens S5.7; TAPA1;    | 0.00284244 | 0.00389498 | 1.06611207 |
| CD151       | NM_004357.3 CD151       |   | 11 Homo sapiens TSPAN24; ME     | 0.01371287 | 0.01495919 | 1.06598716 |
| NUCB1       | NM_006184.3 NUCB1       |   | 19 Homo sapiens DKFZp686A15     | 0.00556398 | 0.00696708 | 1.06560175 |
| ATP5H       | NM_00100378.1 ATP5H     |   | 17 Homo sapiens ATP5JD          | 0.0004427  | 0.00081244 | 1.06511155 |
| TMEM9B      | NM_020644.1 TMEM9B      |   | 11 Homo sapiens C11orf15        | 0.03470567 | 0.03271109 | 1.06466145 |
| DYNLT1      | NM_006519.1 DYNLT1      |   | 6 Homo sapiens tctex-1; CW-1    | 0.00106354 | 0.00169664 | 1.06420819 |
| ACTG1       | NM_001614.2 ACTG1       |   | 17 Homo sapiens DFNA26; ACT     | 0.00018903 | 0.00040159 | 1.06414533 |
| TACC1       | NM_006283.1 TACC1       |   | 8 Homo sapiens DKFZp686K18      | 0.03081249 | 0.02962077 | 1.06371872 |
| RHOA        | NM_001664.2 RHOA        |   | 3 Homo sapiens RHO12; RHOH      | 0.0010133  | 0.00162625 | 1.06310971 |
| ETFA        | NM_000126.1 ETFA        |   | 15 Homo sapiens GA2; MADD; E    | 0.00963697 | 0.01112562 | 1.0629119  |
| FBNP1       | NM_015033.2 FBNP1       |   | 9 Homo sapiens FBP17; MGC1      | 0.05681551 | 0.04937592 | 1.06271039 |
| MDH2        | NM_005918.2 MDH2        |   | 7 Homo sapiens MOR1; MDH; I     | 0.01198702 | 0.01336223 | 1.06262193 |
| CAPZB       | NM_004930.2 CAPZB       |   | 1 Homo sapiens CAPB; MGC10      | 0.03530913 | 0.03320496 | 1.0626065  |
| C20orf43    | NM_016407.1 C20ORF43    |   | 20 Homo sapiens HSPC164; SH     | 0.0027376  | 0.00377194 | 1.06258226 |
| PSMC2       | NM_002803.2 PSMC2       |   | 7 Homo sapiens MGC3004; Nbl     | 0.00403553 | 0.00529263 | 1.06253194 |
| GLO1        | NM_006708.1 GLO1        |   | 6 Homo sapiens GLYI; GLOD1      | 0.00263401 | 0.00365389 | 1.06243339 |
| CPD         | NM_001304.3 CPD         |   | 17 Homo sapiens carboxypeptid   | 0.05474894 | 0.0478501  | 1.06230234 |
| NDRG1       | NM_006096.2 NDRG1       |   | 8 Homo sapiens CMT4D; GC4;      | 0.03898942 | 0.03606676 | 1.06174448 |
| RBM5        | NM_005778.1 RBM5        |   | 3 Homo sapiens LUCA15; RMB!     | 0.03170525 | 0.03036257 | 1.06129978 |
| GABPB2      | NM_002041.3 GABPB2      |   | 15 Homo sapiens NRF2B2; GAB     | 0.00125946 | 0.00195758 | 1.05985657 |
| SAT1        | NM_002970.1 SAT1        | X | Homo sapiens KFSF; SSAT-1       | 0.01170341 | 0.01311104 | 1.05976028 |
| SDF2L1      | NM_022044.2 SDF2L1      |   | 22 Homo sapiens stromal cell-de | 0.00489885 | 0.00623839 | 1.05946048 |
| METAP1      | NM_015143.1 METAP1      |   | 4 Homo sapiens DKFZp781C04      | 0.0147855  | 0.01593122 | 1.0592411  |
| BCAP31      | NM_005745.6 BCAP31      | X | Homo sapiens DXS1357E; 6C       | 0.00695338 | 0.00841155 | 1.0584813  |
| SURF6       | NM_006753.3 SURF6       |   | 9 Homo sapiens FLJ30322         | 0.04447006 | 0.04027044 | 1.05839862 |
| CAPZA2      | NM_006136.2 CAPZA2      |   | 7 Homo sapiens CAPZ; CAPP2      | 0.01780545 | 0.01865819 | 1.05806014 |
| MRFAP1      | NM_033296.1 MRFAP1      |   | 4 Homo sapiens PAM14; PGR1      | 0.00291917 | 0.00398829 | 1.05750529 |
| RPL26L1     | NM_016093.2 RPL26L1     |   | 5 Homo sapiens RPL26P1; FLJ     | 0.01073484 | 0.01218152 | 1.05709919 |
| LOC642489   | XM_925989.1 LOC642489   |   | 6 PREDICTED: Homo sapiens s     | 0.01487238 | 0.01600518 | 1.05696347 |
| DNAL4       | NM_005740.2 DNAL4       |   | 22 Homo sapiens PIG27           | 0.04568955 | 0.04120466 | 1.05661821 |
| LITAF       | NM_004862.2 LITAF       |   | 16 Homo sapiens MGC125274; I    | 0.00991192 | 0.01138761 | 1.05643484 |
| LOC149501   | XR_017100.2 LOC149501   |   | 1 PREDICTED: Homo sapiens n     | 0.00895051 | 0.01045418 | 1.05641699 |
| C8orf41     | NM_025115.1 C8ORF41     |   | 8 Homo sapiens FLJ23263         | 0.0355939  | 0.03344051 | 1.05543747 |
| SSBP1       | NM_003143.1 SSBP1       |   | 7 Homo sapiens SSBP             | 0.00552714 | 0.0069259  | 1.05524066 |
| FAM39E      | XM_930604.1 FAM39E      |   | 9 Homo sapiens FLJ00038         | 0.00949889 | 0.0109966  | 1.055071   |
| SSR4        | NM_006280.1 SSR4        | X | Homo sapiens TRAPD              | 0.01680578 | 0.0177934  | 1.05498382 |
| ORC6L       | NM_014321.2 ORC6L       |   | 16 Homo sapiens ORC6            | 0.004606   | 0.00591353 | 1.05454534 |
| TOMM7       | NM_019059.2 TOMM7       |   | 7 Homo sapiens TOM7             | 0.00084212 | 0.00138964 | 1.05432488 |
| SEPW1       | NM_003009.2 SEPW1       |   | 19 Homo sapiens selW            | 0.01676006 | 0.01774714 | 1.05423211 |
| TMEM106C    | NM_024056.2 TMEM106C    |   | 12 Homo sapiens MGC5576; MG     | 0.01227112 | 0.01362871 | 1.05387343 |
| EIF3I       | NM_003757.1 EIF3I       |   | 1 Homo sapiens EIF3S2; TRIP-    | 0.00481745 | 0.00614811 | 1.05330651 |
| YWHAB       | NM_139323.2 YWHAB       |   | 20 Homo sapiens KCIP-1; HS1;    | 0.01120271 | 0.01262427 | 1.05312905 |
| ATP6V1E1    | NM_00103936.1 ATP6V1E1  |   | 22 Homo sapiens ATP6E2; ATP6    | 0.00574473 | 0.00715767 | 1.05243762 |
| CAP1        | NM_006367.2 CAP1        |   | 1 Homo sapiens CAP1-PEN; CA     | 0.00265806 | 0.00368259 | 1.0522364  |
| SHFM1       | NM_006304.1 SHFM1       |   | 7 Homo sapiens SHSF1; DSS1;     | 0.00548646 | 0.00688082 | 1.05221224 |
| LOC729324   | XR_041500.1 LOC729324   |   | PREDICTED: Homo sapiens n       | 0.00636911 | 0.00781356 | 1.05214302 |
| TMBIM6      | NM_003217.1 TMBIM6      |   | 12 Homo sapiens BI-1; TMBIM6    | 0.0025571  | 0.00356184 | 1.0518938  |
| XPNPEP1     | NM_020383.2 XPNPEP1     |   | 10 Homo sapiens SAMP; XPNPE     | 0.04039256 | 0.0371104  | 1.05181168 |
| PKM2        | NM_002654.3 PKM2        |   | 15 Homo sapiens OIP3; TCB; PK   | 0.01560137 | 0.01666501 | 1.05180011 |
| RPS10       | NM_001014.3 RPS10       |   | 6 Homo sapiens MGC88819         | 0.02427551 | 0.0243811  | 1.05139702 |
| ARCN1       | NM_001655.3 ARCN1       |   | 11 Homo sapiens COPD            | 0.00451172 | 0.00580778 | 1.05108055 |
| APOA1BP     | NM_144772.1 APOA1BP     |   | 1 Homo sapiens MGC119145; I     | 0.01852587 | 0.0192933  | 1.05048329 |
| LOC10000858 | NM_003671.2 LOC10000858 |   | Homo sapiens 28S ribosomal      | 0.02169538 | 0.02210092 | 1.05036386 |
| ATP6V1F     | NM_004231.2 ATP6V1F     |   | 7 Homo sapiens Vma7; MGC12      | 0.00760745 | 0.00908009 | 1.05020515 |
| MKRN1       | NM_013446.2 MKRN1       |   | 7 Homo sapiens RNF61; FLJ21     | 0.03241847 | 0.03089385 | 1.05015575 |
| LOC646942   | XR_016892.2 LOC646942   |   | 7 PREDICTED: Homo sapiens n     | 0.0436166  | 0.03961205 | 1.04982296 |
| CXXC5       | NM_016463.5 CXXC5       |   | 5 Homo sapiens HSPC195          | 0.01089685 | 0.01233823 | 1.04922524 |
| F2R         | NM_001992.2 F2R         |   | 5 Homo sapiens PAR1; TR; HT     | 0.05515031 | 0.0481769  | 1.04902652 |

## 5.0 Upreg

|           |                         |                                |            |            |            |
|-----------|-------------------------|--------------------------------|------------|------------|------------|
| ATP5O     | NM_001697.2 ATP5O       | 21 Homo sapiens OSCP; ATPO     | 0.00679173 | 0.00825355 | 1.04890334 |
| C14orf156 | NM_031210.3 C14ORF156   | 14 Homo sapiens DC50; SLIRP;   | 0.00466031 | 0.00597102 | 1.04783301 |
| ARF4      | NM_001660.2 ARF4        | 3 Homo sapiens ARF2            | 0.02087547 | 0.02138237 | 1.04777346 |
| TECR      | NM_138501.4 TECR        | 19 Homo sapiens TER; SC2       | 0.01551065 | 0.01659235 | 1.04770278 |
| MGC16703  | NM_145042.2 MGC16703    | 22 Homo sapiens tubulin, alpha | 0.01376185 | 0.01500329 | 1.04749364 |
| BANP      | NM_017869.3 BANP        | 16 Homo sapiens DKFZp761H17    | 0.05270089 | 0.04629068 | 1.04729056 |
| NDUFB7    | NM_004146.4 NDUFB7      | 19 Homo sapiens CI-B18; B18;   | 0.04107936 | 0.03764285 | 1.04719657 |
| C20orf100 | NM_032883.1 C20ORF100   | 20 Homo sapiens dJ1108D11.2;   | 0.03320573 | 0.03149358 | 1.04713521 |
| MDH1      | NM_005917.2 MDH1        | 2 Homo sapiens MOR2; MDH-s     | 0.00617576 | 0.00762862 | 1.04678961 |
| MAPRE1    | NM_012325.1 MAPRE1      | 20 Homo sapiens EB1; MGC129    | 0.02230674 | 0.02264222 | 1.04668854 |
| PSMA5     | NM_002790.2 PSMA5       | 1 Homo sapiens ZETA; MGC11     | 0.0054058  | 0.00679325 | 1.04635557 |
| UBC       | NM_021009.3 UBC         | 12 Homo sapiens HMG20          | 0.00111946 | 0.00177135 | 1.04629223 |
| NDUFA12   | NM_018838.3 NDUFA12     | 12 Homo sapiens DAP13; B17.2   | 0.01961363 | 0.02027212 | 1.04620362 |
| PSMD12    | XM_946047.1 PSMD12      | PREDICTED: Homo sapiens p      | 0.00630138 | 0.00775432 | 1.0460237  |
| C16orf61  | NM_020188.2 C16ORF61    | 16 Homo sapiens DC13; 23100    | 0.01285235 | 0.01416131 | 1.04594193 |
| HLA-A     | NM_002116.5 HLA-A       | 6 Homo sapiens major histocor  | 0.00436283 | 0.00563763 | 1.04489211 |
| PHB       | NM_002634.2 PHB         | 17 Homo sapiens PHB1           | 0.01173259 | 0.01313367 | 1.04406542 |
| COX17     | NM_005694.1 COX17       | 3 Homo sapiens MGC117386; I    | 0.00676258 | 0.00822382 | 1.04383009 |
|           | 39326 NM_004404.3 39326 | 2 Homo sapiens KIAA0158; NE    | 0.02866591 | 0.02792126 | 1.04292114 |
| MAD2L2    | NM_006341.2 MAD2L2      | 1 Homo sapiens REV7; MAD2B     | 0.0243056  | 0.02440853 | 1.0423481  |
| LOC91561  | NM_00108082 LOC91561    | Homo sapiens hCG1992539 (      | 0.01914314 | 0.01985131 | 1.04205936 |
| LOC644745 | XR_038862.1 LOC644745   | PREDICTED: Homo sapiens n      | 0.00410035 | 0.00536481 | 1.04158567 |
| CCNI      | NM_006835.2 CCNI        | 4 Homo sapiens CYC1; CYI       | 0.01790041 | 0.01874427 | 1.04146502 |
| DCXR      | NM_016286.2 DCXR        | 17 Homo sapiens P34H; HCRII;   | 0.05042355 | 0.0446074  | 1.04044081 |
| FAM177A1  | NM_173607.3 FAM177A1    | 14 Homo sapiens DKFZp686J12    | 0.04873055 | 0.04344258 | 1.03979417 |
| LOC646785 | XR_017607.1 LOC646785   | 6 PREDICTED: Homo sapiens n    | 0.00981158 | 0.01129155 | 1.03911624 |
| RPL37A    | NM_000998.4 RPL37A      | 2 Homo sapiens MGC74786        | 0.04158972 | 0.03803901 | 1.03877584 |
| LAIR1     | NM_021708.1 LAIR1       | 19 Homo sapiens CD305; LAIR-   | 0.04097172 | 0.03755598 | 1.03858371 |
| ITIH5     | NM_00100185 ITIH5       | 10 Homo sapiens DKFZp686F01    | 0.03231217 | 0.03082267 | 1.0376926  |
| IMAA      | XR_000959.1 IMAA        | 16 Homo sapiens MMAA           | 0.03205038 | 0.03061622 | 1.03767034 |
| CIB1      | NM_006384.2 CIB1        | 15 Homo sapiens SIP2-28; KIP;  | 0.03155271 | 0.03023298 | 1.03730572 |
| LOC391833 | XR_038761.1 LOC391833   | PREDICTED: Homo sapiens n      | 0.05712314 | 0.04955491 | 1.03720799 |
| BOP1      | NM_015201.3 BOP1        | 8 Homo sapiens KIAA0124        | 0.03354923 | 0.03176786 | 1.03590219 |
| TPT1      | NM_003295.1 TPT1        | 13 Homo sapiens TCTP; pO2; HF  | 0.04861742 | 0.04335493 | 1.03586895 |
| RPL27     | NM_000988.2 RPL27       | 17 Homo sapiens ribosomal prot | 0.04365241 | 0.03964047 | 1.03583472 |
| C19orf31  | NM_00101437 C19ORF31    | 19 Homo sapiens FLJ40719       | 0.04903064 | 0.04365244 | 1.03578016 |
| OSTC      | NM_021227.2 OSTC        | 4 Homo sapiens oligosaccharyl  | 0.04414133 | 0.04002232 | 1.03538528 |
| SAE1      | NM_005500.1 SAE1        | 19 Homo sapiens SUA1; AOS1;    | 0.03569461 | 0.03351001 | 1.03465188 |
| CCR6      | NM_031409.2 CCR6        | 6 Homo sapiens CKR-L3; DRY-(   | 0.04809777 | 0.04298766 | 1.03447388 |
| GLRX5     | NM_016417.2 GLRX5       | 14 Homo sapiens GRX5; C14orf   | 0.01458243 | 0.01574335 | 1.03396807 |
| HDAC1     | NM_004964.2 HDAC1       | 1 Homo sapiens GON-10; DKF     | 0.03378058 | 0.03195243 | 1.03272491 |
| ANXA2     | NM_00100285 ANXA2       | 15 Homo sapiens P36; LPC2D; A  | 0.02766984 | 0.02713784 | 1.02841633 |

### 0.5 ACL-Dependent Upreg

| SYMBOL      | SEARCH_KEY  | ILMN_GENE   | CHROMOSOME | DEFINITION                | SYNONYMS                  | pval       | fdr        | fold       |
|-------------|-------------|-------------|------------|---------------------------|---------------------------|------------|------------|------------|
| SLMO2       | NM_016045.2 | SLMO2       | 20         | Homo sapiens              | C20orf45; PRE             | 0.00441245 | 0.02453498 | 339.202669 |
| TES         | NM_015641.2 | TES         | 7          | Homo sapiens              | DKFZP586B20               | 7.0804E-06 | 0.00037846 | 221.476387 |
| MYO19       | NM_00103358 | MYO19       | 17         | Homo sapiens              | FLJ22865; MY              | 0.00021062 | 0.00335572 | 104.961519 |
| CORO6       | NM_032854.1 | CORO6       | 17         | Homo sapiens              | FLJ14871                  | 0.00075046 | 0.00761727 | 63.3469804 |
| CHAF1A      | NM_005483.2 | CHAF1A      | 19         | Homo sapiens              | MGC71229; C               | 0.00017143 | 0.00293976 | 50.7724031 |
| LOC649864   | XM_941341.1 | LOC649864   |            |                           | PREDICTED: Homo sapiens s | 0.00492606 | 0.02626704 | 44.6575295 |
|             | Hs.564221   | HS.564221   | 11         | UI-H-BW1-anf-b-07-0-UI.s1 |                           | 0.01043629 | 0.04404442 | 40.3287209 |
| DNAJC2      | NM_014377.1 | DNAJC2      | 7          | Homo sapiens              | MPP11; MPHO               | 0.00167656 | 0.01295129 | 34.3805719 |
| C5orf34     | NM_198566.1 | C5ORF34     | 5          | Homo sapiens              | MGC46448; FL              | 0.00055833 | 0.00628292 | 32.6056294 |
| LOC728612   | XR_015601.1 | LOC728612   | 5          | PREDICTED: Homo sapiens n |                           | 0.00261027 | 0.01730085 | 31.9423672 |
| GPATCH8     | NM_00100290 | GPATCH8     | 17         | Homo sapiens              | GPATCH8; KIAA             | 0.00750004 | 0.03531815 | 27.8036274 |
| TM4SF18     | NM_138786.1 | TM4SF18     | 3          | Homo sapiens              | L6D                       | 0.00369294 | 0.02183479 | 24.2077768 |
| PGF         | NM_002632.4 | PGF         | 14         | Homo sapiens              | PGFL; PIGF-2;             | 0.00053364 | 0.00612991 | 23.1382363 |
| FAR2        | NM_018099.3 | FAR2        | 12         | Homo sapiens              | FAR2; FLJ1046             | 0.00059954 | 0.00658992 | 19.1402769 |
| UTS2        | NM_006786.2 | UTS2        | 1          | Homo sapiens              | UCN2; PRO10               | 0.00091861 | 0.0087416  | 17.5398408 |
| NEBL        | NM_006393.1 | NEBL        | 10         | Homo sapiens              | MGC119747; I              | 0.00163291 | 0.01273287 | 16.6259498 |
| ARC         | NM_015193.3 | ARC         | 8          | Homo sapiens              | KIAA0278                  | 0.00080976 | 0.00802852 | 16.5903275 |
| RCC1        | NM_001269.3 | RCC1        | 1          | Homo sapiens              | RCC1-I; CHC1              | 0.00054306 | 0.00620587 | 15.4320884 |
|             | Hs.552957   | HS.552957   | 16         | hd40e02.x1                | Soares_NFL_T_C            | 0.00708889 | 0.03399793 | 14.890183  |
| GPRIN1      | NM_052899.1 | GPRIN1      | 5          | Homo sapiens              | KIAA1893; GR              | 0.00012441 | 0.00235588 | 13.7579343 |
| ADPRHL1     | NM_199162.1 | ADPRHL1     | 13         | Homo sapiens              | ARH2                      | 0.01254055 | 0.04966762 | 13.3235398 |
| FOXA1       | NM_004496.2 | FOXA1       | 14         | Homo sapiens              | MGC33105; TC              | 0.0061398  | 0.03072451 | 11.9943146 |
| SLC36A1     | NM_078483.2 | SLC36A1     | 5          | Homo sapiens              | TRAMD3; PAT;              | 0.00018222 | 0.00340983 | 10.882727  |
| EFCAB7      | NM_032437.1 | EFCAB7      | 1          | Homo sapiens              | DKFZp666D22               | 0.0107626  | 0.04490683 | 10.6228812 |
| LRRC49      | NM_017691.2 | LRRC49      | 15         | Homo sapiens              | FLJ20156                  | 0.00568551 | 0.02906562 | 10.3142248 |
| DKFZP564005 | NM_032120.1 | DKFZP564005 | 7          | Homo sapiens              | HSPC304; DKF              | 0.00212694 | 0.01512593 | 10.241101  |
| TMTC4       | NM_032813.2 | TMTC4       | 13         | Homo sapiens              | FLJ22153; FLJ             | 0.00028099 | 0.00407533 | 9.73896138 |
| SPATA7      | NM_018418.1 | SPATA7      | 14         | Homo sapiens              | MGC102934; I              | 9.0427E-06 | 0.00043431 | 9.18452824 |
| ENPP5       | NM_021572.4 | ENPP5       | 6          | Homo sapiens              | KIAA0879                  | 6.0809E-06 | 0.00033869 | 9.02044176 |
| SLC22A17    | NM_016609.3 | SLC22A17    | 14         | Homo sapiens              | BOIT; BOCT; h             | 2.8308E-05 | 0.00089988 | 8.70361391 |
| FAM46C      | NM_017709.2 | FAM46C      | 1          | Homo sapiens              | FLJ20202                  | 0.00395404 | 0.02279895 | 8.30910763 |
| TMEM59L     | NM_012109.2 | TMEM59L     | 19         | Homo sapiens              | BSMAP; C19or              | 1.2819E-05 | 0.00054289 | 8.11267218 |
| WFDC3       | NM_080614.1 | WFDC3       | 20         | Homo sapiens              | WAP14; dJ447              | 0.00231683 | 0.01595422 | 8.10607854 |
| GCNT3       | NM_004751.1 | GCNT3       | 15         | Homo sapiens              | C2/4GnT; GnT              | 5.7929E-06 | 0.00033533 | 7.89108981 |
| GPR89A      | NM_016334.2 | GPR89A      | 1          | Homo sapiens              | SH120; GPR8               | 0.00048078 | 0.00576762 | 7.7178062  |
| ZSCAN29     | NM_152455.2 | ZSCAN29     | 15         | Homo sapiens              | MGC129895; I              | 0.00030922 | 0.00433297 | 7.15373283 |
|             | Hs.254006   | HS.254006   | 5          | Homo sapiens              | cDNA FLJ3883              | 0.00369717 | 0.02185006 | 7.06810542 |
| KIAA0513    | NM_014732.2 | KIAA0513    | 16         | Homo sapiens              | KIAA0513 (KI              | 0.01092681 | 0.04532097 | 6.9994587  |
|             | Hs.540858   | HS.540858   | 17         | op77h04.s1                | Soares_NFL_T_C            | 0.00119759 | 0.01039641 | 6.85165294 |
| EIF1AD      | NM_032325.2 | EIF1AD      | 11         | Homo sapiens              | eukaryotic tra            | 0.00013207 | 0.00247283 | 6.59800953 |
| SERPINE1    | NM_000602.1 | SERPINE1    | 7          | Homo sapiens              | PAI; PAI-1; PA            | 0.00061799 | 0.00669831 | 6.55926231 |
| PLAT        | NM_000930.2 | PLAT        | 8          | Homo sapiens              | T-PA; DKFZp6              | 0.00662717 | 0.03247679 | 6.55527709 |
| EGFL7       | NM_016215.3 | EGFL7       | 9          | Homo sapiens              | RP11-251M1.2              | 0.00449585 | 0.02478047 | 6.09646519 |
| ZNF75A      | NM_153028.1 | ZNF75A      | 16         | Homo sapiens              | FLJ31529                  | 0.00418636 | 0.0236549  | 6.07962001 |
| MGAT4A      | NM_012214.1 | MGAT4A      | 2          | Homo sapiens              | GNT-IVA; GNT              | 0.00125725 | 0.01071776 | 5.90624384 |
| NFKBIE      | NM_004556.2 | NFKBIE      | 6          | Homo sapiens              | IKBE                      | 0.00684149 | 0.03309884 | 5.82389882 |
| WBSCR16     | XM_933544.1 | WBSCR16     | 7          | Homo sapiens              | DKFZp434D04               | 1.6245E-05 | 0.00063712 | 5.78074431 |
| TMX4        | NM_021156.2 | TMX4        | 20         | Homo sapiens              | DJ971N18.2; I             | 0.00625254 | 0.03114755 | 5.69308177 |
| METTL10     | NM_212554.2 | METTL10     | 10         | Homo sapiens              | methyltransfer            | 0.00061514 | 0.00668935 | 5.53440328 |
| FHL1        | NM_001449.3 | FHL1        |            | Homo sapiens              | KYO-T; SLIM1;             | 3.6609E-06 | 0.00025408 | 5.52354204 |
| LOC10013322 | XM_00172456 | LOC10013322 |            |                           | PREDICTED: Homo sapiens s | 0.00200271 | 0.01449912 | 5.39652445 |
| HERC6       | NM_00101300 | HERC6       | 4          | Homo sapiens              | FLJ20637                  | 0.00486872 | 0.0261083  | 5.29951069 |
| KIAA1345    | XM_944553.1 | KIAA1345    |            |                           | PREDICTED: Homo sapiens K | 0.00879281 | 0.03939082 | 5.2982068  |
|             | Hs.521268   | HS.521268   | 7          | UI-E-DW0-agh-n-18-0-UI.s1 |                           | 0.00620286 | 0.03098159 | 5.22192514 |
| LOC10013305 | XM_00171491 | LOC10013305 | 5          | PREDICTED: Homo sapiens h |                           | 0.00064575 | 0.00687006 | 5.21627713 |
| TMEM117     | NM_032256.1 | TMEM117     | 12         | Homo sapiens              | DKFZp434K24               | 0.00100128 | 0.00926237 | 4.97107596 |
| SLC38A6     | NM_153811.1 | SLC38A6     | 14         | Homo sapiens              | NAT-1; MGC1C              | 0.00919755 | 0.04061383 | 4.96455478 |
| CCDC92      | NM_025140.1 | CCDC92      | 12         | Homo sapiens              | FLJ22471                  | 0.00010589 | 0.00211399 | 4.86454034 |
| SNN         | NM_003498.3 | SNN         | 16         | Homo sapiens              | stannin (SNN)             | 0.0007441  | 0.00758167 | 4.81893818 |
| LIFR        | NM_002310.3 | LIFR        | 5          | Homo sapiens              | CD118; STWS               | 0.00442398 | 0.0245682  | 4.79958169 |
| SNORA14B    | NR_002956.1 | SNORA14B    | 1          | Homo sapiens              | ACA14b                    | 0.00722606 | 0.03440682 | 4.79028361 |
| DNER        | NM_139072.2 | DNER        | 2          | Homo sapiens              | bet; UNQ26                | 1.1236E-06 | 0.0001273  | 4.75397153 |
| OR7E156P    | NR_002171.1 | OR7E156P    | 13         | Homo sapiens              | olfactory rece            | 0.0066328  | 0.03248037 | 4.74121057 |
| ERLIN2      | NM_00100379 | ERLIN2      | 8          | Homo sapiens              | C8orf2; MGC8              | 0.00850575 | 0.03845573 | 4.73483217 |
| DKFZp761E19 | NM_138368.2 | DKFZP761E19 | 11         | Homo sapiens              | PP1030                    | 0.01227654 | 0.04906175 | 4.5978242  |
| LOC652185   | XM_941547.1 | LOC652185   |            |                           | PREDICTED: Homo sapiens s | 0.00419492 | 0.02368306 | 4.57943376 |
| C2orf15     | NM_144706.2 | C2ORF15     | 2          | Homo sapiens              | MGC29762                  | 0.0075104  | 0.03534181 | 4.50433643 |
| CD40        | NM_001250.3 | CD40        | 20         | Homo sapiens              | TNFRSF5; p50              | 0.00178376 | 0.01350403 | 4.40007536 |
| LOC730153   | XM_00171767 | LOC730153   | 16         | PREDICTED: Homo sapiens h |                           | 3.6459E-06 | 0.00025437 | 4.39593428 |

### 0.5 ACL-Dependent Upreg

|             |             |             |    |                               |            |            |            |
|-------------|-------------|-------------|----|-------------------------------|------------|------------|------------|
| RNF217      | NM_152553.2 | RNF217      | 6  | Homo sapiens C6orf172; MG     | 0.00326149 | 0.02006231 | 4.34731952 |
| LONRF2      | Hs.21380    | LONRF2      | 2  | Homo sapiens MGC126711; I     | 0.00385901 | 0.02240694 | 4.34597497 |
| LOC145814   | XM_927974.1 | LOC145814   | 15 | PREDICTED: Homo sapiens h     | 0.00573859 | 0.02923549 | 4.33178375 |
|             | Hs.539599   | HS.539599   | 13 | hv29g09.x1 NCI_CGAP_Lu24      | 0.00109928 | 0.00979961 | 4.26908207 |
| LOC10013172 | XM_00172015 | LOC10013172 | 4  | PREDICTED: Homo sapiens h     | 0.00064052 | 0.00684741 | 4.22593886 |
|             | HS.202140   | HS.202140   |    | BX114021 NCI_CGAP_Lu24 t      | 0.00163453 | 0.01273801 | 4.09946177 |
| SCHIP1      | NM_014575.1 | SCHIP1      | 3  | Homo sapiens FLJ39160; SCI    | 0.00457607 | 0.02507665 | 4.07613214 |
| FANCA       | NM_000135.2 | FANCA       | 16 | Homo sapiens FAA; FA; FA1;    | 0.00940864 | 0.04116204 | 3.65893432 |
| LOC441714   | XR_019458.2 | LOC441714   |    | PREDICTED: Homo sapiens n     | 0.01025515 | 0.0436412  | 3.95328285 |
|             | HS.254752   | HS.254752   | 3  | xv32c11.x1 Soares_NFL_T_C     | 0.0013294  | 0.01108336 | 3.89003734 |
| LOC728226   | XM_927596.1 | LOC728226   | 22 | PREDICTED: Homo sapiens s     | 0.00175255 | 0.01335162 | 3.88764478 |
|             | HS.562197   | HS.562197   | 1  | 602137688F1 NIH_MGC_83 l      | 0.00093402 | 0.00883126 | 3.83838017 |
| KRTAP10-3   | NM_198696.2 | KRTAP10-3   | 21 | Homo sapiens KAP10.3; KAP     | 0.0093691  | 0.04109754 | 3.83830697 |
| HOXA2       | NM_006735.3 | HOXA2       | 7  | Homo sapiens HOX1K            | 0.00914312 | 0.04042737 | 3.81406019 |
| INHBE       | NM_031479.3 | INHBE       | 12 | Homo sapiens MGC4638          | 0.00025681 | 0.00386414 | 3.78789239 |
|             | Hs.539054   | HS.539054   | 11 | xj22c02.x1 NCI_CGAP_Ut2 H     | 0.00308228 | 0.01930026 | 3.76582725 |
| ANO9        | NM_00101230 | ANO9        | 11 | Homo sapiens TP53I5; PIG5     | 0.00114927 | 0.01012274 | 3.7194713  |
| USP46       | NM_022832.2 | USP46       | 4  | Homo sapiens FLJ12552         | 0.00020535 | 0.00329951 | 3.67679108 |
| LOC650755   | XM_939838.1 | LOC650755   |    | PREDICTED: Homo sapiens s     | 0.00441245 | 0.02452472 | 3.66803718 |
| PRKACB      | NM_207578.1 | PRKACB      | 1  | Homo sapiens PKACB; MGC4      | 0.00223417 | 0.01555471 | 3.65883349 |
|             | HS.537217   | HS.537217   | 14 | Homo sapiens mRNA for IgE     | 0.00687742 | 0.03319997 | 3.65880544 |
| NDST2       | NM_003635.2 | NDST2       | 10 | Homo sapiens HSST2; NCST;     | 0.00240167 | 0.01629303 | 3.58659522 |
| FLJ11292    | NM_018382.1 | FLJ11292    | 5  | Homo sapiens hypothetical p   | 0.00109276 | 0.009781   | 3.56005329 |
| WDHD1       | NM_00100839 | WDHD1       | 14 | Homo sapiens AND-1            | 0.00378262 | 0.02212814 | 3.54778717 |
| FARP1       | NM_00100171 | FARP1       | 13 | Homo sapiens CDEP; PLEKHC     | 0.00057972 | 0.00645239 | 3.52651568 |
| REP15       | NM_00102987 | REP15       | 12 | Homo sapiens RAB15 effecto    | 0.00547879 | 0.02848111 | 3.51592981 |
| LOC645487   | XM_932932.1 | LOC645487   | 20 | PREDICTED: Homo sapiens h     | 0.00020112 | 0.00324343 | 3.50189531 |
| PLA2G12A    | NM_030821.3 | PLA2G12A    | 4  | Homo sapiens PLA2G12          | 0.00099192 | 0.00922727 | 3.49919854 |
| C3orf41     | XM_934359.1 | C3orf41     | 3  | PREDICTED: Homo sapiens c     | 0.00653422 | 0.03222381 | 3.48259019 |
|             | HS.400256   | HS.400256   | 4  | Homo sapiens cDNA FLJ3373     | 0.00182792 | 0.01368203 | 3.4765742  |
| LOC642946   | XM_931870.1 | LOC642946   | 1  | PREDICTED: Homo sapiens h     | 0.0004851  | 0.00578282 | 3.45605332 |
| FAM13A      | NM_014883.2 | FAM13A      | 4  | Homo sapiens FLJ34562; MG     | 0.01249264 | 0.04961127 | 3.44150143 |
| FUZ         | NM_025129.3 | FUZ         | 19 | Homo sapiens FLJ12116; GA     | 0.00172285 | 0.01320121 | 3.28200005 |
| TRAF3       | NM_003300.2 | TRAF3       | 14 | Homo sapiens CD40bp; CAP-     | 0.0005853  | 0.00649811 | 3.35587822 |
| DOK4        | NM_018110.2 | DOK4        | 16 | Homo sapiens FLJ10488         | 0.00431812 | 0.0242034  | 3.32259632 |
| CD164L2     | NM_207397.1 | CD164L2     | 1  | Homo sapiens UNQ6122          | 0.00072589 | 0.00744769 | 3.27358223 |
| GAL3ST4     | NM_024637.3 | GAL3ST4     | 7  | Homo sapiens FLJ12116; GA     | 0.000504   | 0.00590716 | 3.26831599 |
| ABCC10      | NM_033450.2 | ABCC10      | 6  | Homo sapiens MRP7; EST18;     | 0.00037575 | 0.00493648 | 3.23379739 |
| FLJ90757    | NM_00100433 | FLJ90757    | 17 | PREDICTED: Homo sapiens h     | 4.7263E-06 | 0.00029834 | 3.23293099 |
| LOC646869   | XM_943845.1 | LOC646869   |    | PREDICTED: Homo sapiens h     | 0.00168989 | 0.01302397 | 3.22856309 |
| ZNF197      | NM_00102485 | ZNF197      | 3  | Homo sapiens P18; ZNF20; Z    | 0.00419964 | 0.02369965 | 3.22409953 |
| FRYL        | XM_945291.1 | FRYL        | 4  | Homo sapiens FLJ16177; KIA    | 0.00471767 | 0.02554633 | 3.19313092 |
|             | HS.547601   | HS.547601   | 22 | Homo sapiens full length inse | 1.1238E-05 | 0.00049822 | 3.18955504 |
| TMEM191B    | XM_938147.1 | TMEM191B    | 22 | PREDICTED: Homo sapiens t     | 0.00307759 | 0.01929828 | 3.18263513 |
| IFIT1       | NM_001548.2 | IFIT1       | 10 | Homo sapiens RNMS561; IFI-    | 0.00055235 | 0.00625811 | 3.17209287 |
| MAN1A1      | NM_005907.2 | MAN1A1      | 6  | Homo sapiens MAN9; HUMM:      | 1.4097E-06 | 0.00015318 | 3.15018072 |
| LOC91948    | XM_378549.3 | LOC91948    |    | PREDICTED: Homo sapiens h     | 0.00564065 | 0.02897035 | 3.11836817 |
|             | HS.576106   | HS.576106   | 10 | Homo sapiens cDNA FLJ4005     | 4.9751E-05 | 0.00130336 | 3.10418786 |
| CDC6        | NM_001254.3 | CDC6        | 17 | Homo sapiens HsCDC18; HsC     | 7.1468E-05 | 0.00161946 | 3.1009135  |
| NAV3        | NM_014903.3 | NAV3        | 12 | Homo sapiens unc53H3; STE     | 3.4691E-05 | 0.00102877 | 3.09791678 |
| HYAL3       | NM_003549.2 | HYAL3       | 3  | Homo sapiens LUCA14; Minn     | 0.00042592 | 0.00531137 | 3.06358396 |
| TMOD1       | NM_003275.1 | TMOD1       | 9  | Homo sapiens ETMOD; D9S5      | 0.00588101 | 0.02969854 | 3.04923983 |
|             | HS.566306   | HS.566306   | 5  | op77c07.s1 Soares_NFL_T_C     | 0.01140497 | 0.0466474  | 3.04200433 |
|             | HS.565917   | HS.565917   |    | UI-H-BI3-alg-g-11-0-UI.s1 N   | 0.00102905 | 0.00940115 | 3.03473174 |
| ZHX3        | NM_015035.3 | ZHX3        | 20 | Homo sapiens KIAA0395; TI     | 0.00118156 | 0.01029769 | 3.00967117 |
| MORN4       | NM_178832.2 | MORN4       | 10 | Homo sapiens bA548K23.4; l    | 0.00641486 | 0.03176519 | 3.00168135 |
| DNAJC27     | NM_016544.1 | DNAJC27     | 2  | Homo sapiens RABJ5; DKFZp     | 0.00106936 | 0.00966947 | 2.93846659 |
| LOC645478   | XM_932922.1 | LOC645478   | 16 | PREDICTED: Homo sapiens h     | 0.00239978 | 0.01630519 | 2.93397221 |
| LOC652164   | XM_941509.1 | LOC652164   |    | PREDICTED: Homo sapiens s     | 0.00829753 | 0.03778499 | 2.91256809 |
|             | HS.576601   | HS.576601   | 10 | DB297320 BRACE2 Homo sa       | 0.00179993 | 0.01356444 | 2.90763072 |
| SERPINA5    | NM_000624.3 | SERPINA5    | 14 | Homo sapiens PROCI; PAI3;     | 0.00041234 | 0.00521563 | 2.90032132 |
| PRKY        | NM_002760.2 | PRKY        |    | Homo sapiens protein kinase   | 0.00808427 | 0.03714561 | 2.88722288 |
| FUT4        | NM_002033.2 | FUT4        | 11 | Homo sapiens FCT3A; ELFT;     | 0.00938162 | 0.04113886 | 2.84717308 |
| LOC652353   | XM_941781.1 | LOC652353   |    | PREDICTED: Homo sapiens s     | 0.00046106 | 0.00558662 | 2.82820118 |
| BBS7        | NM_018190.2 | BBS7        | 4  | Homo sapiens FLJ10715; BB     | 0.00166125 | 0.01285556 | 2.77772812 |
| TAF6        | NM_139122.1 | TAF6        | 7  | Homo sapiens MGC:8964; DI     | 0.00466618 | 0.02535772 | 2.76380792 |
| DAB2        | NM_001343.1 | DAB2        | 5  | Homo sapiens FLJ26626; DO     | 0.00167715 | 0.01294083 | 2.76287518 |
|             | HS.103173   | HS.103173   | 12 | BX100504 Soares_fetal_hear    | 0.00105745 | 0.00958136 | 2.74618685 |
| KIAA0427    | NM_014772.1 | KIAA0427    | 18 | Homo sapiens Gm672            | 0.00038945 | 0.00502197 | 2.73966924 |
| MAN2A2      | NM_006122.2 | MAN2A2      | 15 | Homo sapiens MANA2X           | 0.01163094 | 0.04732342 | 2.71919251 |

### 0.5 ACL-Dependent Upreg

|             |             |              |    |                              |            |            |            |
|-------------|-------------|--------------|----|------------------------------|------------|------------|------------|
| GALNT2      | NM_004481.2 | GALNT2       | 1  | Homo sapiens GalNAc-T2       | 0.01057578 | 0.04440688 | 2.68125684 |
| PTPRE       | NM_130435.2 | PTPRE        | 10 | Homo sapiens DKFZp313F13     | 0.00238808 | 0.01627578 | 2.67723869 |
| CERCAM      | NM_016174.3 | CERCAM       | 9  | Homo sapiens CEECAM1; MG     | 0.00083215 | 0.00820753 | 2.675965   |
|             | Hs.541726   | HS.541726    | 2  | UI-CF-DU1-adj-b-02-0-UI.s1   | 0.00163074 | 0.01272342 | 2.66203357 |
| MANEAL      | NM_00103174 | MANEAL       | 1  | Homo sapiens RP11-109P14.    | 0.00059096 | 0.00653354 | 2.65018055 |
| SNX1        | NM_003099.3 | SNX1         | 15 | Homo sapiens SNX1A; Vps5;    | 5.4465E-05 | 0.00138047 | 2.6491677  |
| LOC646825   | XM_929783.1 | LOC646825    | 19 | PREDICTED: Homo sapiens s    | 0.00469619 | 0.02547162 | 2.647871   |
|             | Hs.569104   | HS.569104    | 12 | BX337332 Homo sapiens PL     | 0.00322581 | 0.01994467 | 2.63015172 |
|             | Hs.574587   | HS.574587    | 19 | DA863698 PLACE7 Homo sa      | 0.00489642 | 0.02614051 | 2.62484982 |
| LOC644571   | XM_927686.1 | LOC644571    | 7  | PREDICTED: Homo sapiens h    | 0.00702999 | 0.03377656 | 2.61383503 |
| KLF10       | NM_005655.1 | KLF10        | 8  | Homo sapiens TIEG; EGRA; T   | 0.0030786  | 0.01929546 | 2.60299903 |
| CNTD2       | NM_024877.1 | CNTD2        | 19 | Homo sapiens FLJ13265        | 0.00200004 | 0.01449564 | 2.60075403 |
| OR8K5       | NM_00100405 | OR8K5        | 11 | Homo sapiens OR11-174        | 0.01124723 | 0.04618753 | 2.59879951 |
| OR52L1      | NM_00100517 | OR52L1       | 11 | Homo sapiens OR11-50         | 0.00322751 | 0.01993659 | 2.59483716 |
| CPXM1       | NM_019609.3 | CPXM1        | 20 | Homo sapiens CPX1; CPXM      | 0.00111315 | 0.00990332 | 2.55713341 |
| CST7        | NM_003650.2 | CST7         | 20 | Homo sapiens CMAP            | 0.00341491 | 0.02074611 | 2.55096052 |
| CCNYL1      | NM_152523.1 | CCNYL1       | 2  | Homo sapiens FLJ40432        | 0.00091403 | 0.00871052 | 2.53934627 |
| KIF13B      | NM_015254.2 | KIF13B       | 8  | Homo sapiens KIAA0639; GA    | 0.00036356 | 0.0048194  | 2.52518147 |
| NSD1        | NM_022455.3 | NSD1         | 5  | Homo sapiens DKFZp666C16     | 0.00650295 | 0.03208155 | 2.51797463 |
| KCNRG       | NM_173605.1 | KCNRG        | 13 | Homo sapiens DLTET           | 0.01054385 | 0.04435713 | 2.51466333 |
| LPXN        | NM_004811.1 | LPXN         | 11 | Homo sapiens LDPL            | 0.00016008 | 0.00279212 | 2.49658511 |
| LOC730323   | XM_00172209 | LOC730323    | 7  | PREDICTED: Homo sapiens h    | 0.00435765 | 0.02437343 | 2.47528934 |
|             | Hs.136788   | HS.136788    | 5  | ac76f10.x5 Stratagene lung ( | 0.00806295 | 0.03708623 | 2.46998941 |
| FAM83B      | NM_00101087 | FAM83B       | 6  | Homo sapiens FLJ30642; MG    | 0.01083221 | 0.04505547 | 2.451426   |
| CDC20B      | NM_152623.1 | CDC20B       | 5  | Homo sapiens FLJ37927; G6'   | 0.00012825 | 0.00241153 | 2.45022999 |
| HOXC8       | NM_022658.3 | HOXC8        | 12 | Homo sapiens HOX3; HOX3A     | 0.01191854 | 0.04810966 | 2.44972428 |
| LOC649025   | XM_938110.1 | LOC649025    |    | PREDICTED: Homo sapiens h    | 0.00109509 | 0.00978864 | 2.42868694 |
| LOC283874   | NM_00101273 | LOC283874    | 16 | Homo sapiens FLJ20393        | 0.00557276 | 0.02883393 | 2.42663586 |
| LRIG1       | NM_015541.2 | LRIG1        | 3  | Homo sapiens LIG-1; LIG1; I  | 0.0119979  | 0.04829765 | 2.42564164 |
| LOC10013132 | XR_039461.1 | LOC100131323 |    | PREDICTED: Homo sapiens n    | 0.00882408 | 0.03947755 | 2.40149176 |
| ISG20       | NM_002201.4 | ISG20        | 15 | Homo sapiens CD25; HEM45     | 0.003342   | 0.02043427 | 2.39615423 |
| LOC730081   | XR_041261.1 | LOC730081    |    | PREDICTED: Homo sapiens n    | 3.3389E-05 | 0.00100364 | 2.39448838 |
| SNORA79     | NR_003021.2 | SNORA79      | 14 | Homo sapiens ACA65           | 0.00296241 | 0.0187983  | 2.3596311  |
| ATP6AP1L    | NM_00101797 | ATP6AP1L     | 5  | Homo sapiens MGC138396       | 6.2812E-05 | 0.00150841 | 2.35745437 |
| AGTPBP1     | NM_015239.1 | AGTPBP1      | 9  | Homo sapiens NNA1; KIAA1C    | 0.00152975 | 0.01220121 | 2.35604985 |
| LOC284293   | XM_209104.2 | LOC284293    | 18 | PREDICTED: Homo sapiens s    | 0.0096361  | 0.04199086 | 2.34193876 |
| CD47        | NM_00102508 | CD47         | 3  | Homo sapiens OAS3; MER6; I   | 0.00034527 | 0.00464183 | 2.31986179 |
| MIR526A2    | NR_030208.1 | MIR526A2     |    | Homo sapiens microRNA 526    | 0.00394012 | 0.02277811 | 2.31856527 |
| TTY5        | NR_001541.1 | TTY5         |    | Homo sapiens TTY5            | 0.00271826 | 0.01773288 | 2.31788995 |
| LOC653158   | XM_926814.1 | LOC653158    | 5  | PREDICTED: Homo sapiens s    | 0.00401322 | 0.02300009 | 2.30793039 |
| GABRG2      | NM_198904.1 | GABRG2       | 5  | Homo sapiens ECA2; GEFSP     | 0.00463117 | 0.02526371 | 2.30326563 |
| FZD3        | NM_017412.2 | FZD3         | 8  | Homo sapiens hFz3; Fz-3      | 0.01161648 | 0.04729361 | 2.30063214 |
|             | Hs.583755   | HS.583755    | 8  | Homo sapiens cDNA FLJ3105    | 0.01099574 | 0.04554984 | 2.2947265  |
| C9orf9      | NM_018956.3 | C9ORF9       | 9  | Homo sapiens chromosome 9    | 0.00179956 | 0.01356938 | 2.27734167 |
| MIR607      | NR_030338.1 | MIR607       |    | Homo sapiens microRNA 607    | 0.00660263 | 0.03240449 | 2.27336556 |
|             | Hs.208405   | HS.208405    | 4  | DA311740 BRHIP3 Homo sa      | 0.01232834 | 0.04919459 | 2.27332032 |
| MMP15       | NM_002428.2 | MMP15        | 16 | Homo sapiens MTMMP2; MT2     | 0.00127559 | 0.01080465 | 2.26021591 |
|             | Hs.559234   | HS.559234    |    | UI-H-BI1-adr-f-06-0-UI.s1 N  | 0.01244481 | 0.04949547 | 2.22454952 |
| RALGPS1     | NM_014636.1 | RALGPS1      | 9  | Homo sapiens KIAA0351; RA    | 0.00134916 | 0.01114991 | 2.21839481 |
| MPP7        | NM_173496.2 | MPP7         | 10 | Homo sapiens FLJ32798; RPP   | 0.00383479 | 0.02232497 | 2.2036896  |
| KDM6B       | NM_00108042 | KDM6B        | 17 | Homo sapiens KIAA0346        | 0.00941231 | 0.04116448 | 2.19473725 |
| FLJ43276    | NM_207382.1 | FLJ43276     | 15 | Homo sapiens FLJ43276 prot   | 0.00048543 | 0.00578153 | 2.1825983  |
|             | Hs.145985   | HS.145985    | 19 | qm64a10.x1 Soares_placent    | 0.0104446  | 0.04406546 | 2.17575713 |
| LOC645113   | XM_930333.1 | LOC645113    | 22 | PREDICTED: Homo sapiens h    | 0.01052432 | 0.04434533 | 2.16993346 |
| GRPR        | NM_005314.2 | GRPR         |    | Homo sapiens gastrin-releasi | 0.00034376 | 0.00462625 | 2.16317705 |
| CPA4        | NM_016352.2 | CPA4         | 7  | Homo sapiens CPA3            | 0.00059163 | 0.00653556 | 2.1569373  |
| CA11        | NM_001217.3 | CA11         | 19 | Homo sapiens CARP2; CA-RP    | 0.00232031 | 0.01596162 | 2.156248   |
| DDAH2       | NM_013974.1 | DDAH2        | 6  | Homo sapiens DDAHII; NG3C    | 0.0009536  | 0.00896516 | 2.15533923 |
| FLJ46284    | XM_499123.2 | FLJ46284     | 8  | PREDICTED: Homo sapiens h    | 0.00780033 | 0.03630659 | 2.15194798 |
|             | Hs.582457   | HS.582457    | 5  | DA175295 BRAMY2 Homo sa      | 0.00987966 | 0.04272914 | 2.14481082 |
| SORL1       | NM_003105.3 | SORL1        | 11 | Homo sapiens LR11; LRP9; S   | 1.7569E-05 | 0.00067312 | 2.14293109 |
| GPR137B     | NM_003272.1 | GPR137B      | 1  | Homo sapiens TM7SF1          | 0.00097788 | 0.00914161 | 2.1429299  |
| SNORD51     | NR_002589.1 | SNORD51      | 2  | Homo sapiens U51; RNU51      | 0.00280436 | 0.01808981 | 2.13769375 |
| ETNK2       | NM_018208.1 | ETNK2        | 1  | Homo sapiens FLJ10761; HM    | 0.00175795 | 0.01336974 | 2.10597668 |
| BMPR2       | NM_001204.5 | BMPR2        | 2  | Homo sapiens BRK-3; BMPR     | 0.00382011 | 0.02226884 | 2.08999614 |
| GDAP2       | NM_017686.1 | GDAP2        | 1  | Homo sapiens FLJ20142; dJ7   | 0.01037079 | 0.04392177 | 2.08195664 |
| SLC25A21    | NM_030631.1 | SLC25A21     | 14 | Homo sapiens MGC126570; C    | 0.00728778 | 0.0346137  | 2.08001347 |
| BMP7        | NM_001719.1 | BMP7         | 20 | Homo sapiens OP-1            | 0.00104984 | 0.009532   | 2.07685312 |
|             | Hs.540335   | HS.540335    | 15 | UI-H-ED1-axx-k-12-0-UI.s1 I  | 0.00032941 | 0.00450173 | 2.07128075 |
| LOC732371   | XM_941758.1 | LOC732371    |    | PREDICTED: Homo sapiens s    | 0.00527537 | 0.02766228 | 2.06444637 |

## 0.5 ACL-Dependent Upreg

|             |             |             |    |                              |            |            |            |
|-------------|-------------|-------------|----|------------------------------|------------|------------|------------|
| RELL2       | NM_173828.3 | RELL2       | 5  | Homo sapiens RELL2; FLJ905   | 0.00731454 | 0.03470347 | 2.05772738 |
| LOC151457   | XR_038833.1 | LOC151457   |    | PREDICTED: Homo sapiens n    | 0.00673892 | 0.03274603 | 2.04968519 |
| LYRM4       | NM_020408.3 | LYRM4       | 6  | Homo sapiens C6orf149; CGI   | 0.00186314 | 0.01384401 | 2.04820656 |
| NHEDC2      | XM_933390.1 | NHEDC2      | 4  | Homo sapiens FLJ23984; NH    | 0.00664939 | 0.03248962 | 2.04428212 |
| WDR89       | NM_00100872 | WDR89       | 14 | Homo sapiens MSTP050; MG     | 0.00205604 | 0.01480437 | 2.03282631 |
| CDKN1C      | NM_000076.1 | CDKN1C      | 11 | Homo sapiens BWCR; p57; B    | 0.00010851 | 0.00213413 | 2.02581047 |
| MYO1D       | NM_015194.1 | MYO1D       | 17 | Homo sapiens KIAA0727; my    | 1.0422E-05 | 0.00047477 | 2.02285651 |
| LOC652900   | XM_00172491 | LOC652900   |    | PREDICTED: Homo sapiens s    | 0.00451545 | 0.0248575  | 2.02285083 |
| CECR6       | NM_031890.2 | CECR6       | 22 | Homo sapiens cat eye syndrc  | 0.00774772 | 0.03613784 | 2.02215596 |
| CYP2R1      | NM_024514.4 | CYP2R1      | 11 | Homo sapiens MGC4663         | 1.0095E-05 | 0.00046792 | 2.0088861  |
| LOC650257   | XM_944121.1 | LOC650257   |    | PREDICTED: Homo sapiens h    | 0.00456966 | 0.02505189 | 2.00661387 |
| LOC642035   | XM_936105.1 | LOC642035   |    | PREDICTED: Homo sapiens h    | 0.00190438 | 0.01407161 | 2.0059734  |
| SCARNA18    | NR_003139.1 | SCARNA18    | 5  | Homo sapiens U109            | 0.00117762 | 0.01027011 | 1.99945759 |
| CNR1        | NM_016083.3 | CNR1        | 6  | Homo sapiens CNR; CANN6;     | 0.0049046  | 0.02617367 | 1.99876644 |
| SIPA1L1     | NM_015556.1 | SIPA1L1     | 14 | Homo sapiens E6TP1; KIAA0    | 0.01219942 | 0.04882716 | 1.99691868 |
| PLEKHM1     | NM_014798.1 | PLEKHM1     |    | PREDICTED: Homo sapiens p    | 0.0003712  | 0.00489132 | 1.99010142 |
| FLJ23834    | NM_152750.2 | FLJ23834    | 7  | Homo sapiens FLJ43271; MG    | 0.00089329 | 0.00859317 | 1.98644629 |
| GDPD5       | NM_030792.4 | GDPD5       | 11 | Homo sapiens PP1665; GDE2    | 0.00185394 | 0.01380664 | 1.98566512 |
|             | Hs.482960   | HS.482960   | 5  | Homo sapiens partial mRNA;   | 0.00916586 | 0.04051437 | 1.98551921 |
| UFSP1       | NM_00101507 | UFSP1       | 7  | Homo sapiens UFM1-specific   | 0.00225144 | 0.01560933 | 1.98135703 |
| LOC10012897 | XR_037834.1 | LOC10012897 |    | PREDICTED: Homo sapiens n    | 0.01201336 | 0.04833055 | 1.98016513 |
| KRTDAP      | NM_207392.1 | KRTDAP      | 19 | Homo sapiens MGC163373; l    | 0.0004369  | 0.00539749 | 1.97933459 |
| PTPN13      | NM_080684.1 | PTPN13      | 4  | Homo sapiens PTP1E; PNP1;    | 0.0025348  | 0.01693616 | 1.97819914 |
| PLCD3       | NM_133373.2 | PLCD3       | 17 | Homo sapiens MGC71172        | 0.00417669 | 0.02365067 | 1.96811438 |
| CCNT1       | NM_001240.2 | CCNT1       | 12 | Homo sapiens CYCT1; CCNT     | 0.00121967 | 0.01053286 | 1.96555702 |
| LOC642111   | XM_936250.1 | LOC642111   |    | PREDICTED: Homo sapiens h    | 0.00921311 | 0.04065547 | 1.96367622 |
| AMH         | NM_000479.2 | AMH         | 19 | Homo sapiens MIF; MIS        | 0.0037793  | 0.02213806 | 1.96314642 |
| LOC10012955 | NR_024618.1 | LOC10012955 | 3  | Homo sapiens hypothetical L  | 0.00177288 | 0.01345238 | 1.95496269 |
| GLDN        | NM_181789.1 | GLDN        | 15 | Homo sapiens CRG-L2; UNC-    | 6.6766E-05 | 0.00156094 | 1.95047553 |
| MEGF6       | NM_001409.3 | MEGF6       | 1  | Homo sapiens KIAA0815; EG    | 0.00216258 | 0.0152485  | 1.9464793  |
| CYorf15A    | NM_00100585 | CYORF15A    |    | Homo sapiens MGC131732; l    | 0.01156097 | 0.04714002 | 1.94038652 |
| OR8J3       | NM_00100406 | OR8J3       | 11 | Homo sapiens OR11-173        | 0.00094217 | 0.00889554 | 1.93405076 |
| METTL2B     | NM_018396.1 | METTL2B     | 7  | Homo sapiens METL; METTL2    | 0.00510012 | 0.02699967 | 1.93288314 |
| C10orf41    | XM_210876.4 | C10ORF41    | 10 | PREDICTED: Homo sapiens c    | 0.00200246 | 0.01450527 | 1.93219888 |
| C17orf28    | NM_030630.1 | C17ORF28    | 17 | Homo sapiens FLJ43526; DM    | 0.00666344 | 0.03253426 | 1.9312996  |
| LOC646663   | XM_929606.1 | LOC646663   | 19 | PREDICTED: Homo sapiens s    | 0.00208945 | 0.01497986 | 1.92283363 |
| ING5        | XM_941026.1 | ING5        |    | PREDICTED: Homo sapiens ir   | 0.00103323 | 0.00942637 | 1.92119803 |
| ADCK5       | NM_174922.3 | ADCK5       | 8  | Homo sapiens MGC126708; l    | 0.00067794 | 0.00710976 | 1.91619696 |
| OPTN        | NM_00100821 | OPTN        | 10 | Homo sapiens FIP2; HYPL; N   | 4.9159E-05 | 0.00129554 | 1.91416943 |
| AASDH       | NM_181806.2 | AASDH       | 4  | Homo sapiens LYS2; ACSF4;    | 0.00161786 | 0.01266017 | 1.90931154 |
| HDLBP       | NM_005336.1 | HDLBP       | 2  | Homo sapiens HBP; VGL; FLJ   | 0.00244826 | 0.01655821 | 1.90443219 |
| GADD45B     | NM_015675.1 | GADD45B     | 19 | Homo sapiens MYD118; DKF:    | 0.00029901 | 0.00425287 | 1.88863673 |
|             | Hs.565550   | HS.565550   | 2  | UI-H-CO0-aqr-d-03-0-UI.s1 l  | 0.00724916 | 0.03449206 | 1.86876773 |
| FAM149B1    | NM_173348.1 | FAM149B1    | 10 | Homo sapiens family with se  | 1.1055E-05 | 0.00049677 | 1.86770603 |
| TBC1D2      | NM_018421.2 | TBC1D2      | 9  | Homo sapiens FLJ10702; DK    | 0.00349034 | 0.02109801 | 1.86003739 |
| AP2A1       | NM_014203.2 | AP2A1       | 19 | Homo sapiens CLAPA1; AP2-    | 0.00053251 | 0.00612759 | 1.8581983  |
| LOC10012881 | XM_00173286 | LOC10012881 |    | PREDICTED: Homo sapiens A    | 0.00582676 | 0.0295597  | 1.85446607 |
| RCOR2       | NM_173587.2 | RCOR2       | 11 | Homo sapiens REST corepres   | 3.4939E-05 | 0.00103152 | 1.85385122 |
| MYOM2       | NM_003970.1 | MYOM2       | 8  | Homo sapiens TTNAP           | 0.01102582 | 0.04563167 | 1.85272534 |
| TRAPPC6A    | NM_024108.1 | TRAPPC6A    | 19 | Homo sapiens MGC2650; TR:    | 0.000902   | 0.00862695 | 1.8398594  |
|             | Hs.444939   | HS.444939   | 1  | AV744922 CB Homo sapiens     | 0.0065796  | 0.03232732 | 1.83146209 |
| ZNF599      | NM_00100724 | ZNF599      | 19 | Homo sapiens zinc finger pro | 0.00151788 | 0.01215036 | 1.8243572  |
| ACAA2       | NM_006111.1 | ACAA2       | 18 | Homo sapiens DSAEC           | 5.0328E-05 | 0.00131327 | 1.82241182 |
| ATG4A       | NM_178271.1 | HTG4A       |    | Homo sapiens APG4A; AULTL2   | 0.0055331  | 0.0286735  | 1.80902633 |
| ZNF431      | NM_133473.1 | ZNF431      | 19 | Homo sapiens KIAA1969; DK    | 0.00064228 | 0.00684965 | 1.80555917 |
| CTRC        | NM_007272.2 | CTRC        | 1  | Homo sapiens ELA4; CLCR      | 0.00049161 | 0.00580822 | 1.80131288 |
| LAMA2       | NM_000426.3 | LAMA2       | 6  | Homo sapiens LAMM            | 0.00570019 | 0.02909578 | 1.80059471 |
| WNT2B       | NM_024494.1 | WNT2B       | 1  | Homo sapiens WNT13; XWN1     | 0.00364108 | 0.02169267 | 1.79791074 |
| THBS3       | NM_007112.3 | THBS3       | 1  | Homo sapiens MGC119564; "    | 0.01227595 | 0.04907418 | 1.79122773 |
| LOC642072   | XM_936152.1 | LOC642072   |    | PREDICTED: Homo sapiens s    | 0.00618999 | 0.03092896 | 1.79097841 |
| TBC1D9      | NM_015130.1 | TBC1D9      | 4  | Homo sapiens KIAA0882; MC    | 0.00488719 | 0.0261439  | 1.7905953  |
| CHCHD7      | NM_00101167 | CHCHD7      | 8  | Homo sapiens FLJ40966; MG    | 1.7797E-05 | 0.00067988 | 1.79053963 |
| SAMD3       | NM_00101737 | SAMD3       | 6  | Homo sapiens MGC35163; Fl    | 0.0005378  | 0.00617233 | 1.78704654 |
| TMEM50A     | NM_014313.2 | TMEM50A     | 1  | Homo sapiens SMP1; RP11-3    | 0.00075393 | 0.00763488 | 1.78138398 |
| LASS5       | NM_147190.1 | LASS5       | 12 | Homo sapiens Trh4; MGC454    | 0.00031331 | 0.00436725 | 1.77230033 |
| RAD51L3     | NM_002878.2 | RAD51L3     | 17 | Homo sapiens R5LH3; Trad;    | 0.00872406 | 0.03918878 | 1.772124   |
| GRAMD3      | NM_023927.1 | GRAMD3      | 5  | Homo sapiens NS3TP2; FLJ2    | 0.00999934 | 0.04305011 | 1.77068313 |
| C20orf108   | NM_080821.1 | C20ORF108   | 20 | Homo sapiens DKFZP434A11     | 8.7371E-07 | 0.00010824 | 1.76998524 |
| LOC728667   | XM_00112808 | LOC728667   | 14 | PREDICTED: Homo sapiens s    | 0.00322245 | 0.01993319 | 1.76057681 |
| GAA         | NM_000152.2 | GAA         | 17 | Homo sapiens LYAG            | 2.1187E-05 | 0.00075297 | 1.7593806  |

### 0.5 ACL-Dependent Upreg

|             |             |             |    |                              |            |            |            |
|-------------|-------------|-------------|----|------------------------------|------------|------------|------------|
| NEU1        | NM_000434.2 | NEU1        | 6  | Homo sapiens NEU; SIAL1      | 7.9931E-07 | 9.9959E-05 | 1.75362596 |
| POLR2J4     | NM_175064.2 | POLR2J4     |    | Homo sapiens RPB11-phi; M    | 0.00898663 | 0.03994863 | 1.75122781 |
| SV2B        | NM_014848.2 | SV2B        | 15 | Homo sapiens HsT19680; KI    | 0.00720269 | 0.03434493 | 1.74989252 |
| SP100       | NM_00108039 | SP100       | 2  | Homo sapiens DKFZp686E07     | 0.01104118 | 0.04568098 | 1.73967214 |
| AHNAK2      | NM_138420.2 | AHNAK2      | 14 | Homo sapiens KIAA2019; C1    | 3.997E-06  | 0.00027172 | 1.73898228 |
| HLA-DMA     | NM_006120.2 | HLA-DMA     | 6  | Homo sapiens HLADM; RING     | 2.125E-06  | 0.00018905 | 1.73888826 |
| GAD1        | NM_013445.3 | GAD1        | 2  | Homo sapiens SCP; FLJ4588    | 0.00112985 | 0.01002496 | 1.73312719 |
| LACTB       | NM_171846.1 | LACTB       | 15 | Homo sapiens FLJ14902; G2    | 0.00084186 | 0.00826036 | 1.73285676 |
|             | Hs.554169   | HS.554169   | 18 | RST33611 Athersys RAGE Lit   | 0.00444252 | 0.0246196  | 1.73161851 |
| SLC22A18    | NM_002555.3 | SLC22A18    | 11 | Homo sapiens IMPT1; ORCTL    | 5.3621E-05 | 0.0013643  | 1.73139859 |
| FBXO17      | NM_148169.1 | FBXO17      | 19 | Homo sapiens FBXO26; MGC     | 0.00938572 | 0.0411296  | 1.73035333 |
| LOC729580   | XM_00113070 | LOC729580   | 20 | PREDICTED: Homo sapiens h    | 0.00434316 | 0.02432319 | 1.7295702  |
| MGC39900    | XM_936687.1 | MGC39900    |    | PREDICTED: Homo sapiens h    | 7.3886E-06 | 0.00038713 | 1.72723606 |
|             | Hs.552896   | HS.552896   | 11 | Homo sapiens cDNA FLJ4349    | 0.00677217 | 0.03288346 | 1.72484503 |
| ABHD8       | NM_024527.3 | ABHD8       | 19 | Homo sapiens FLJ11743; MG    | 0.00172055 | 0.0131912  | 1.71878221 |
| C7orf54     | NM_014411.2 | C7ORF54     | 7  | Homo sapiens NSG-X; NAG8;    | 0.00927258 | 0.04083633 | 1.71824015 |
| ACAD10      | NM_025247.3 | ACAD10      | 12 | Homo sapiens MGC5601         | 0.00219672 | 0.01543172 | 1.7157979  |
| C4orf33     | NM_173487.1 | C4ORF33     | 4  | Homo sapiens FLJ33703        | 0.00868484 | 0.03910539 | 1.71069023 |
| DAAM1       | NM_014992.1 | DAAM1       | 14 | Homo sapiens FLJ41657; KIA   | 0.00212946 | 0.01512763 | 1.70896505 |
| YAF2        | NM_00101242 | YAF2        | 12 | Homo sapiens MGC41856        | 0.00109043 | 0.0097667  | 1.70602085 |
| LOC10013424 | XM_00171742 | LOC10013424 |    | PREDICTED: Homo sapiens h    | 0.00027148 | 0.00400309 | 1.70185164 |
| NPAL3       | NM_020448.2 | NPAL3       | 1  | Homo sapiens RP3-462023.3    | 0.00496198 | 0.02643731 | 1.69624509 |
| CNFN        | NM_032488.2 | CNFN        | 19 | Homo sapiens PLAC8L2         | 1.2275E-05 | 0.00053174 | 1.69408489 |
| KRTAP2-1    | XM_927523.1 | KRTAP2-1    | 17 | PREDICTED: Homo sapiens k    | 0.00084474 | 0.00828247 | 1.67992077 |
| TYROBP      | NM_003332.2 | TYROBP      | 19 | Homo sapiens DAP12; KARA     | 0.00111803 | 0.00994008 | 1.67854802 |
| RNFT1       | NM_016125.2 | RNFT1       | 17 | Homo sapiens PTD016; MGC     | 0.00344246 | 0.02085612 | 1.67854665 |
| SLC35E3     | NM_018656.2 | SLC35E3     | 12 | Homo sapiens BLOV1           | 0.00284068 | 0.01827077 | 1.67732832 |
| PPIL6       | NM_173672.1 | PPIL6       | 6  | Homo sapiens BA425D10.6; I   | 0.00298609 | 0.01887631 | 1.6772624  |
| LAMB2       | NM_002292.2 | LAMB2       | 3  | Homo sapiens LAMS            | 3.1634E-05 | 0.00096622 | 1.67138968 |
| HABP4       | NM_014282.1 | HABP4       | 9  | Homo sapiens SERBP1L; IHA    | 6.8221E-08 | 2.4442E-05 | 1.66879268 |
| IFT52       | NM_016004.2 | IFT52       | 20 | Homo sapiens NGD5; CGI-53    | 0.00019234 | 0.00313616 | 1.6656417  |
| SNTA1       | NM_003098.2 | SNTA1       | 20 | Homo sapiens SNT1; dJ1187    | 0.00017237 | 0.00294825 | 1.65618367 |
| U1SNRNPBP   | NM_180703.1 | U1SNRNPBP   | 12 | Homo sapiens MGC138160; I    | 0.0035843  | 0.02147989 | 1.65343811 |
| FIBCD1      | NM_032843.3 | FIBCD1      | 9  | Homo sapiens FLJ14810        | 0.00265483 | 0.01743927 | 1.65051238 |
| CBR4        | NM_032783.3 | CBR4        | 4  | Homo sapiens FLJ14431        | 2.5178E-05 | 0.00083026 | 1.64432226 |
| EPHX1       | NM_000120.2 | EPHX1       | 1  | Homo sapiens EPOX; MEH; E    | 0.00055501 | 0.00626675 | 1.6420854  |
| GHDC        | NM_032484.3 | GHDC        | 17 | Homo sapiens D11LGP1; LGF    | 0.00053249 | 0.00613267 | 1.63977335 |
| AKAP13      | NM_007200.3 | AKAP13      | 15 | Homo sapiens HA-3; FLJ1195   | 0.00188588 | 0.01398168 | 1.63495498 |
| MLF1        | NM_022443.2 | MLF1        | 3  | Homo sapiens myeloid leuker  | 0.00023972 | 0.00368653 | 1.63185523 |
| C14orf79    | NM_174891.2 | C14ORF79    | 14 | Homo sapiens chromosome 1    | 0.00183828 | 0.01372087 | 1.63046045 |
| TRAPPC2     | NM_00101165 | TRAPPC2     |    | Homo sapiens hYP38334; TR    | 0.00276438 | 0.01795423 | 1.62716341 |
| NFKB2       | NM_00107749 | NFKB2       | 10 | Homo sapiens LYT10; LYT-10   | 0.00041868 | 0.00525575 | 1.62643705 |
| LOC727884   | XR_037459.1 | LOC727884   |    | PREDICTED: Homo sapiens n    | 0.00589097 | 0.0297149  | 1.61602413 |
|             | Hs.491292   | HS.491292   | 8  | Homo sapiens cDNA FLJ3655    | 0.00178721 | 0.01351473 | 1.61292174 |
| FAM116B     | NM_00100179 | FAM116B     |    | Homo sapiens MGC33692        | 0.0001014  | 0.00205847 | 1.61121809 |
| CCS         | XM_938909.1 | CCS         |    | PREDICTED: Homo sapiens c    | 0.00367771 | 0.02180311 | 1.6063742  |
| LOC401305   | XM_376573.3 | LOC401305   | 7  | PREDICTED: Homo sapiens s    | 0.01007374 | 0.04317411 | 1.60366052 |
| DHDH        | NM_014475.2 | DHDH        | 19 | Homo sapiens HUM2DD          | 5.1759E-05 | 0.00133747 | 1.60311421 |
| STAT3       | NM_213662.1 | STAT3       | 17 | Homo sapiens APRF; FLJ2088   | 2.2652E-06 | 0.00019372 | 1.59837008 |
| LOC642859   | XM_932076.1 | LOC642859   | 8  | PREDICTED: Homo sapiens s    | 0.0016068  | 0.01261084 | 1.59762318 |
| MAP3K12     | NM_006301.2 | MAP3K12     | 12 | Homo sapiens DLK; ZPKP1; Z   | 0.00213356 | 0.0151324  | 1.59723349 |
| C7orf41     | NM_152793.1 | C7ORF41     | 7  | Homo sapiens FLJ25903; El    | 7.64E-06   | 0.00038362 | 1.59713781 |
| ZBTB42      | NM_00113760 | ZBTB42      | 14 | Homo sapiens zinc finger anc | 0.00269636 | 0.01763343 | 1.59384427 |
| LOC643319   | XM_927980.1 | LOC643319   | 8  | PREDICTED: Homo sapiens s    | 0.01004666 | 0.04315572 | 1.59137046 |
| CYP2S1      | NM_030622.5 | CYP2S1      | 19 | Homo sapiens cytochrome P4   | 0.00222871 | 0.01554938 | 1.58845133 |
| FAM113A     | NM_022760.3 | FAM113A     | 20 | Homo sapiens C20orf81; bA1   | 0.00298146 | 0.01885604 | 1.58752307 |
| TP53INP1    | NM_033285.2 | TP53INP1    | 8  | Homo sapiens TP53INP1A; T    | 2.2734E-06 | 0.00019318 | 1.57819757 |
| ACSL1       | NM_001995.2 | ACSL1       | 4  | Homo sapiens FACL2; LACS;    | 0.00035074 | 0.00468822 | 1.57746982 |
| PHC3        | NM_024947.2 | PHC3        | 3  | Homo sapiens FLJ12729; HPI   | 0.01244253 | 0.04950126 | 1.57710007 |
| SPIRE2      | NM_032451.1 | SPIRE2      | 16 | Homo sapiens MGC117166; S    | 0.00066713 | 0.00703538 | 1.56473173 |
| MT1G        | NM_005950.1 | MT1G        | 16 | Homo sapiens MT1; MT1K; M    | 2.3442E-06 | 0.00019544 | 1.55664838 |
| LOC729885   | XR_015687.2 | LOC729885   | 19 | PREDICTED: Homo sapiens n    | 0.00558586 | 0.02885664 | 1.5552479  |
| B9D2        | NM_030578.2 | B9D2        | 19 | Homo sapiens MGC4093; ICI    | 0.0046637  | 0.02535767 | 1.55451677 |
| ZNF558      | NM_144693.1 | ZNF558      | 19 | Homo sapiens FLJ30932        | 0.00080022 | 0.00796969 | 1.55305304 |
| SESTD1      | NM_178123.3 | SESTD1      | 2  | Homo sapiens DKFZp434005     | 0.00318365 | 0.01977623 | 1.55248268 |
| GLB1L2      | NM_138342.2 | GLB1L2      | 11 | Homo sapiens MST114; MSTI    | 8.1493E-05 | 0.0017594  | 1.55181789 |
| BCL6        | NM_001706.2 | BCL6        | 3  | Homo sapiens ZBTB27; ZNF     | 6.3823E-05 | 0.00152164 | 1.55159155 |
| SNORD3A     | NR_006880.1 | SNORD3A     | 17 | Homo sapiens U3              | 4.1141E-06 | 0.00027825 | 1.54855173 |
| ATP6V1C1    | NM_001695.3 | ATP6V1C1    | 8  | Homo sapiens VATC; FLJ200    | 0.00505557 | 0.02686036 | 1.54388725 |
| SYT1        | NM_005639.1 | SYT1        | 12 | Homo sapiens SVP65; SYT; P   | 0.00232661 | 0.01598837 | 1.54236675 |



## 0.5 ACL-Dependent Upreg

|             |                          |                                 |            |            |            |
|-------------|--------------------------|---------------------------------|------------|------------|------------|
| KCNMB4      | NM_014505.4 KCNMB4       | 12 Homo sapiens potassium lar   | 0.00468186 | 0.02541471 | 1.53879654 |
| YPEL5       | NM_016061.1 YPEL5        | 2 Homo sapiens CGI-127          | 1.3956E-06 | 0.00015289 | 1.53569594 |
| CBLB        | NM_170662.3 CBLB         | 3 Homo sapiens DKFZp779F14      | 0.00302739 | 0.01901044 | 1.53463784 |
| LOC643201   | XM_932165.1 LOC643201    | 5 PREDICTED: Homo sapiens h     | 0.00408736 | 0.02327405 | 1.53327973 |
| MXRA7       | NM_00100852 MXRA7        | 17 Homo sapiens TMAP1; PS1TF    | 0.0004238  | 0.00529988 | 1.53300767 |
| RTF1        | NM_015138.3 RTF1         | 15 Homo sapiens KIAA0252; GT    | 0.0052654  | 0.02765379 | 1.53177691 |
| MYLIP       | NM_013262.3 MYLIP        | 6 Homo sapiens MIR              | 4.3885E-07 | 7.009E-05  | 1.53008816 |
| CSAD        | NM_015989.3 CSAD         | 12 Homo sapiens PCAP; MGC11     | 0.00439216 | 0.02449411 | 1.52548383 |
| GMPR        | NM_006877.2 GMPR         | 6 Homo sapiens GMPR1            | 0.00031059 | 0.004343   | 1.52425971 |
| FAM8A1      | NM_016255.1 FAM8A1       | 6 Homo sapiens FLJ23721; AH     | 0.00132646 | 0.01108669 | 1.52177779 |
| NOXA1       | NM_006647.1 NOXA1        | 9 Homo sapiens MGC131800; I     | 0.0001156  | 0.00224042 | 1.51996823 |
| FBXL2       | NM_012157.2 FBXL2        | 3 Homo sapiens FBL2; FBL3; D    | 0.00014041 | 0.00256726 | 1.51784325 |
| TBC1D16     | NM_019020.2 TBC1D16      | 17 Homo sapiens FLJ20748; MG    | 0.00389128 | 0.0225548  | 1.51735039 |
| IDH2        | NM_002168.2 IDH2         | 15 Homo sapiens ICD-M; IDHM;    | 7.3689E-06 | 0.00038763 | 1.51478339 |
| ACTA2       | NM_001613.1 ACTA2        | 10 Homo sapiens ACTSA           | 3.6865E-05 | 0.00107639 | 1.51022973 |
| LOC730262   | XM_371302.3 LOC730262    | 1 PREDICTED: Homo sapiens s     | 0.01148957 | 0.04692106 | 1.50971763 |
| GPR108      | NM_00108045 GPR108       | 19 Homo sapiens LUSTR2; MGC     | 0.00220585 | 0.01547129 | 1.50848298 |
| GOLGA8G     | NM_00101242 GOLGA8G      | 15 Homo sapiens DKFZp434K05     | 0.0072742  | 0.03456156 | 1.50844244 |
| NEURL1B     | NM_00114265 NEURL1B      | 5 Homo sapiens neuralized hor   | 2.6443E-05 | 0.00086125 | 1.50810869 |
| CYB5R1      | NM_016243.2 CYB5R1       | 1 Homo sapiens B5R.1; NQO3/     | 0.00190126 | 0.01405642 | 1.50808652 |
| ACY1        | NM_000666.1 ACY1         | 3 Homo sapiens ACY1D; ACYL/     | 0.0002562  | 0.00385928 | 1.50701759 |
| CBX7        | NM_175709.2 CBX7         | 22 Homo sapiens chromobox ho    | 0.00025426 | 0.00384749 | 1.50644544 |
| DFNA5       | NM_004403.1 DFNA5        | 7 Homo sapiens ICERE-1          | 5.0533E-06 | 0.00031012 | 1.50474167 |
| GRIN1       | NM_000832.5 GRIN1        | 9 Homo sapiens NMDAR1; NMD      | 8.0016E-05 | 0.001736   | 1.50311803 |
| ATXN1       | NM_000332.2 ATXN1        | 6 Homo sapiens SCA1; D6S50      | 0.00013369 | 0.00249246 | 1.49999647 |
| CEBPA       | NM_004364.2 CEBPA        | 19 Homo sapiens CEBP; C/EBP-    | 0.00358633 | 0.02148232 | 1.49890766 |
| SLC7A11     | NM_014331.2 SLC7A11      | 4 Homo sapiens CCBR1; xCT       | 0.00352519 | 0.02122157 | 1.49839954 |
| CDC14B      | NM_033332.1 CDC14B       | 9 Homo sapiens CDC14B3; hCl     | 9.4199E-05 | 0.00196029 | 1.49798776 |
| C2orf7      | NM_032319.1 C2ORF7       | 2 Homo sapiens PAP21; MGC1      | 0.00324595 | 0.01998528 | 1.49730052 |
| TTYH3       | NM_025250.2 TTYH3        | 7 Homo sapiens KIAA1691         | 0.00024268 | 0.00372772 | 1.49620775 |
| TM2D2       | NM_078473.2 TM2D2        | 8 Homo sapiens MGC125814; I     | 0.0102209  | 0.04357936 | 1.4893068  |
| ZNF18       | NM_144680.2 ZNF18        | 17 Homo sapiens KOX11; ZKSC     | 0.00838033 | 0.03804442 | 1.48149525 |
| NOV         | NM_002514.2 NOV          | 8 Homo sapiens IGFBP9; NOV/     | 0.00853359 | 0.03856845 | 1.47793239 |
| CORIN       | NM_006587.2 CORIN        | 4 Homo sapiens Lrp4; Tmprss     | 0.00088584 | 0.00854011 | 1.47204051 |
| C11orf67    | NM_024684.2 C11ORF67     | 11 Homo sapiens FLJ21035; MG    | 6.36E-06   | 0.00034838 | 1.46929452 |
| SORT1       | NM_002959.4 SORT1        | 1 Homo sapiens NT3; Gp95        | 4.3165E-06 | 0.00028187 | 1.46911692 |
| GRAMD4      | NM_015124.2 GRAMD4       | 22 Homo sapiens KIAA0767; MC    | 0.00716938 | 0.0342724  | 1.46658714 |
| ZNF45       | NM_003425.2 ZNF45        | 19 Homo sapiens KOX5; ZNF13     | 0.00272478 | 0.01774921 | 1.46546769 |
| TUFT1       | NM_020127.1 TUFT1        | 1 Homo sapiens tuftelin 1 (TUF  | 4.7102E-05 | 0.00126394 | 1.46400374 |
| KDM5B       | NM_006618.3 KDM5B        | 1 Homo sapiens FLJ23670; FLJ    | 5.6779E-05 | 0.00141212 | 1.46006336 |
| DNM2        | NM_004945.2 DNM2         | 19 Homo sapiens CMTD11; CMTI    | 0.00073164 | 0.00748926 | 1.45466053 |
| LOC10013357 | XM_00171453 LOC100133578 | PREDICTED: Homo sapiens s       | 0.00480396 | 0.02589725 | 1.45220124 |
| FAM176A     | NM_00113503 FAM176A      | 2 Homo sapiens family with sei  | 0.00896536 | 0.0399076  | 1.45155421 |
| EXT1        | NM_000127.2 EXT1         | 8 Homo sapiens ttv; EXT         | 0.00042134 | 0.00527414 | 1.44817198 |
| PEX6        | NM_000287.2 PEX6         | 6 Homo sapiens PAF-2; PAF2; I   | 0.0005661  | 0.00634878 | 1.44658847 |
| LOC653438   | XM_929895.1 LOC653438    | 1 PREDICTED: Homo sapiens s     | 0.00380422 | 0.0222153  | 1.44652623 |
| TERC        | NR_001566.1 TERC         | 3 Homo sapiens TRC3; TR; hTF    | 7.5715E-05 | 0.00167279 | 1.44566043 |
| ANKRD20A1   | NM_00101242 ANKRD20A1    | Homo sapiens DKFZp434A17        | 0.00104484 | 0.00951265 | 1.44543677 |
| NBPF9       | XM_933968.1 NBPF9        | 1 PREDICTED: Homo sapiens n     | 0.01069787 | 0.04474945 | 1.4441374  |
| LOC728686   | XR_038523.1 LOC728686    | PREDICTED: Homo sapiens n       | 0.00732633 | 0.03474699 | 1.4383179  |
| FIG4        | NM_014845.4 FIG4         | 6 Homo sapiens SAC3; RP1-24     | 0.00028386 | 0.00409897 | 1.43524054 |
| AKAP8L      | NM_014371.2 AKAP8L       | 19 Homo sapiens HAP95; NAKA/    | 0.01025297 | 0.04367396 | 1.43269946 |
| RPL28       | NM_000991.3 RPL28        | 19 Homo sapiens FLJ43307        | 0.00121626 | 0.01051713 | 1.43202424 |
| PVRL2       | NM_00104272 PVRL2        | 19 Homo sapiens PVRR2; HVBE;    | 0.00014577 | 0.00263257 | 1.42639684 |
| PRKCZ       | NM_00103358 PRKCZ        | 1 Homo sapiens PKC2             | 0.00166265 | 0.01285883 | 1.42554986 |
| CADM4       | NM_145296.1 CADM4        | 19 Homo sapiens Necl-4; TSSL2   | 0.0018444  | 0.01375103 | 1.42481814 |
| ARL4A       | NM_00103716 ARL4A        | 7 Homo sapiens ARL4             | 0.00124611 | 0.01065018 | 1.42213351 |
| ITFG3       | NM_032039.1 ITFG3        | 16 Homo sapiens FLJ32603; DK    | 0.00054508 | 0.00621289 | 1.41692602 |
| LOC399965   | XR_036921.1 LOC399965    | PREDICTED: Homo sapiens n       | 2.5558E-05 | 0.00083861 | 1.41673844 |
| HSDL2       | NM_032303.2 HSDL2        | 9 Homo sapiens MGC10940; C'     | 1.9899E-05 | 0.00073273 | 1.41581932 |
| LOC284701   | XM_935939.1 LOC284701    | PREDICTED: Homo sapiens h       | 0.00926079 | 0.04081152 | 1.40958096 |
| EMR2        | NM_152916.1 EMR2         | 19 Homo sapiens CD312; DKFZ/    | 0.00384418 | 0.0223502  | 1.40955089 |
| ABHD12      | NM_00104247 ABHD12       | 20 Homo sapiens DKFZP434P10     | 0.00712827 | 0.03413742 | 1.40501039 |
| RNF165      | NM_152470.2 RNF165       | 18 Homo sapiens ring finger pro | 0.00194286 | 0.01419768 | 1.4047494  |
| TRIM5       | NM_033092.1 TRIM5        | 11 Homo sapiens RNF88; TRIM5    | 0.00757241 | 0.03555786 | 1.40250119 |
| MPZL1       | NM_024569.3 MPZL1        | 1 Homo sapiens PZR; PZRa; Pz    | 0.00027253 | 0.00400959 | 1.40122816 |
| NUDT18      | NM_024815.2 NUDT18       | 8 Homo sapiens FLJ22494         | 0.00025166 | 0.00383013 | 1.40044144 |
| ASAP3       | NM_017707.2 ASAP3        | 1 Homo sapiens CENTB6; ACA/     | 8.8279E-06 | 0.00042865 | 1.39817407 |
| HLA-G       | NM_002127.3 HLA-G        | 6 Homo sapiens MHC-G            | 0.0112994  | 0.04633    | 1.39769334 |
| LQK1        | XR_041452.1 LQK1         | 1 PREDICTED: Homo sapiens n     | 0.00475813 | 0.02570241 | 1.39699096 |

### 0.5 ACL-Dependent Upreg

|             |                          |                               |            |            |            |
|-------------|--------------------------|-------------------------------|------------|------------|------------|
| TTPAL       | NM_024331.2 TTPAL        | 20 Homo sapiens DKFZp686E08   | 0.00050968 | 0.00593705 | 1.39518881 |
| CRIPAK      | NM_175918.2 CRIPAK       | 4 Homo sapiens FLJ34443       | 0.00054199 | 0.00619897 | 1.39517762 |
| MTF1        | NM_005955.1 MTF1         | 1 Homo sapiens MGC23036; ZI   | 0.00252377 | 0.01688799 | 1.39297118 |
| FAM69B      | XM_942503.1 FAM69B       | PREDICTED: Homo sapiens fr    | 0.00022241 | 0.00347679 | 1.39253827 |
| FYCO1       | NM_024513.1 FYCO1        | 3 Homo sapiens FLJ13335; RU   | 3.4148E-05 | 0.00102412 | 1.39250427 |
| SLC9A1      | NM_003047.2 SLC9A1       | 1 Homo sapiens APNH; FLJ422   | 0.00045241 | 0.00552732 | 1.39089692 |
| FBXO2       | NM_183412.2 FBXO2        | 1 Homo sapiens Fbs1; FBG1; F  | 5.3861E-06 | 0.00032017 | 1.38590586 |
| TMEM175     | NM_032326.2 TMEM175      | 4 Homo sapiens MGC4618        | 6.7113E-05 | 0.00156079 | 1.38272906 |
| SCARNA16    | NR_003013.1 SCARNA16     | 17 Homo sapiens ACA47         | 0.00192679 | 0.01412692 | 1.37990327 |
| RAB24       | NM_00103167 RAB24        | 5 Homo sapiens RAB24, memb    | 0.00061615 | 0.00668929 | 1.37969045 |
| TMEM120A    | NM_031925.1 TMEM120A     | 7 Homo sapiens TMPIT          | 0.00021751 | 0.00342434 | 1.37932841 |
| MICA        | NM_000247.1 MICA         | 6 Homo sapiens PERB11.1; MG   | 0.00422728 | 0.02383533 | 1.37812011 |
| RELL1       | NM_00108540 RELL1        | 4 Homo sapiens MGC50583; FI   | 0.00093136 | 0.00881239 | 1.3766411  |
| C15orf21    | NM_00100526 C15ORF21     | 15 Homo sapiens D-PCA-2; FLJ3 | 0.00349748 | 0.02111231 | 1.37547373 |
| SIPA1L2     | NM_020808.1 SIPA1L2      | 1 Homo sapiens SPAL2; FLJ231  | 0.00040848 | 0.00517177 | 1.37428482 |
| WIPI1       | NM_017983.3 WIPI1        | Homo sapiens WIPI49; FLJ10    | 0.00043714 | 0.00539544 | 1.3739424  |
| HEXDC       | NM_173620.1 HEXDC        | 17 Homo sapiens FLJ23825      | 0.00702963 | 0.03378706 | 1.37293798 |
| FLJ10213    | NM_018029.3 FLJ10213     | 3 Homo sapiens hypothetical p | 0.00181197 | 0.01363971 | 1.37261747 |
| ABCB9       | NM_203444.1 ABCB9        | 12 Homo sapiens TAPL; KIAA15  | 3.3124E-05 | 0.00099794 | 1.37127348 |
| VASN        | NM_138440.1 VASN         | 16 Homo sapiens SLITL2        | 2.2722E-05 | 0.00078439 | 1.3698102  |
| ZSWIM6      | XM_035299.7 ZSWIM6       | 5 PREDICTED: Homo sapiens z   | 0.00264628 | 0.01741761 | 1.36976195 |
|             | Hs.4988 HS.4988          | 2 Homo sapiens mRNA; cDNA l   | 0.00015246 | 0.00269832 | 1.36905436 |
| SREBF1      | NM_004176.3 SREBF1       | 17 Homo sapiens SREBP1        | 1.5998E-06 | 0.00016439 | 1.36672147 |
| KRT8P9      | XR_017231.2 KRT8P9       | 15 PREDICTED: Homo sapiens n  | 4.4434E-05 | 0.00122202 | 1.36632556 |
| UNC5A       | NM_133369.2 UNC5A        | 5 Homo sapiens UNC5H1; FLJ1   | 0.00033373 | 0.00453273 | 1.3660458  |
| RN5S9       | NR_023371.1 RN5S9        | 1 Homo sapiens RNA, 5S ribos  | 0.00078054 | 0.00783261 | 1.36558519 |
| GBF1        | NM_004193.1 GBF1         | 10 Homo sapiens KIAA0248; MC  | 0.01045295 | 0.04408665 | 1.36510932 |
| PQLC3       | NM_152391.2 PQLC3        | 2 Homo sapiens C2orf22; MGC   | 1.5196E-06 | 0.00015737 | 1.36468336 |
| CDK5        | NM_004935.2 CDK5         | 7 Homo sapiens PSSALRE        | 2.8339E-05 | 0.00089872 | 1.36419016 |
| ETS1        | NM_005238.2 ETS1         | 11 Homo sapiens FLJ10768; ET  | 9.1167E-05 | 0.00192437 | 1.36079692 |
| C6orf203    | NM_016487.2 C6ORF203     | 6 Homo sapiens RP11-59I9.1;   | 0.00117546 | 0.01027832 | 1.35698843 |
| CTSD        | NM_001909.3 CTSD         | 11 Homo sapiens CLN10; MGC2   | 0.00191909 | 0.01410171 | 1.35641498 |
|             | Hs.19339 HS.19339        | 3 Homo sapiens cDNA clone IM  | 0.00010608 | 0.00211451 | 1.35611417 |
| CELSR2      | NM_001408.1 CELSR2       | 1 Homo sapiens CDHF10; FLJ4   | 0.0092653  | 0.0408178  | 1.35547537 |
| ANXA2P3     | NR_001446.1 ANXA2P3      | 10 Homo sapiens ANX2L3; LIP2; | 0.00228023 | 0.0157595  | 1.35231812 |
| GPC4        | NM_001448.2 GPC4         | Homo sapiens K-glypican       | 7.8179E-05 | 0.00171297 | 1.35224801 |
| SEMA4F      | NM_004263.2 SEMA4F       | 2 Homo sapiens PRC2353; M-S   | 0.0002474  | 0.00378267 | 1.3518269  |
| C4orf48     | NM_00114193 C4ORF48      | 4 Homo sapiens chromosome 4   | 0.00137837 | 0.01130671 | 1.3503732  |
| LOC441019   | XM_498969.2 LOC441019    | 4 PREDICTED: Homo sapiens h   | 0.00492187 | 0.02625526 | 1.34950201 |
|             | Hs.570988 HS.570988      | 5 Homo sapiens primary neuro  | 0.00189719 | 0.014042   | 1.34623568 |
| ACOT11      | NM_015547.2 ACOT11       | 1 Homo sapiens BFIT2; BFIT1;  | 0.00117681 | 0.01027652 | 1.34287074 |
| STX12       | NM_177424.1 STX12        | 1 Homo sapiens STX14; MGC5    | 0.00235779 | 0.01613568 | 1.34171484 |
| SCARNA14    | NR_004388.1 SCARNA14     | 15 Homo sapiens U100          | 0.00152236 | 0.01216419 | 1.33980028 |
| PTGES       | NM_004878.3 PTGES        | 9 Homo sapiens mPGES-1; MG    | 0.00286718 | 0.01834333 | 1.33968338 |
| BNIP3L      | NM_004331.2 BNIP3L       | 8 Homo sapiens BNIP3a; NIX    | 0.00027615 | 0.00404045 | 1.33899757 |
| CLYBL       | NM_138280.3 CLYBL        | 13 Homo sapiens bA134015.1;   | 8.0784E-05 | 0.00174693 | 1.33818192 |
| UBL7        | NM_032907.3 UBL7         | 15 Homo sapiens TCBA1; MGC1   | 0.00173986 | 0.01330076 | 1.33749556 |
| TBC1D2B     | NM_015079.2 TBC1D2B      | 15 Homo sapiens KIAA1055; FL  | 0.00373288 | 0.02194372 | 1.33632061 |
| APLP2       | NM_001642.1 APLP2        | 11 Homo sapiens CDEBP; APPH;  | 5.6228E-05 | 0.00140899 | 1.33326048 |
|             | Hs.371609 HS.371609      | 3 Homo sapiens cDNA clone IM  | 0.00019064 | 0.00312758 | 1.33321705 |
| LOC10013253 | XR_038464.1 LOC100132535 | PREDICTED: Homo sapiens n     | 0.0009008  | 0.0086217  | 1.3309273  |
| MAP1LC3B    | NM_022818.3 MAP1LC3B     | 16 Homo sapiens MAP1A/1BLC3   | 2.9077E-06 | 0.00022541 | 1.32581742 |
| KLHL24      | NM_017644.3 KLHL24       | 3 Homo sapiens FLJ25796; KR   | 0.00487312 | 0.02611078 | 1.32508904 |
| LEPRE1      | NM_022356.2 LEPRE1       | 1 Homo sapiens P3H1; MGC11    | 0.00252038 | 0.01688233 | 1.32508389 |
| CYFIP2      | NM_00103733 CYFIP2       | 5 Homo sapiens PIR121         | 6.6299E-05 | 0.00155827 | 1.32419311 |
| PMVK        | NM_006556.2 PMVK         | 1 Homo sapiens PMKASE; HUM    | 0.004864   | 0.02609353 | 1.32207854 |
| TMEM30A     | NM_018247.2 TMEM30A      | 6 Homo sapiens FLJ10856; C6   | 0.00027765 | 0.00404895 | 1.32090013 |
| LSR         | NM_205834.2 LSR          | 19 Homo sapiens MGC48312; LI  | 0.00044134 | 0.00543218 | 1.31976807 |
| SYT7        | XM_943690.1 SYT7         | PREDICTED: Homo sapiens s     | 0.00782245 | 0.0363585  | 1.31823425 |
| GSDMB       | NM_018530.1 GSDMB        | 17 Homo sapiens PRO2521; PP4  | 3.7351E-05 | 0.00108343 | 1.31706423 |
| C20orf94    | NM_00100960 C20ORF94     | 20 Homo sapiens dJ1099D15.3;  | 0.0110749  | 0.0457491  | 1.31613819 |
| TBC1D8      | NM_007063.2 TBC1D8       | Homo sapiens AD3; VRP; HB     | 0.0046762  | 0.02539442 | 1.31270482 |
| JUP         | NM_021991.1 JUP          | 17 Homo sapiens PKGB; CTNNG   | 1.99E-06   | 0.00018319 | 1.31182959 |
| COPG2       | NM_012133.2 COPG2        | 7 Homo sapiens FLJ11781; 2-C  | 0.01158063 | 0.04716218 | 1.3115124  |
| CBARA1      | NM_006077.1 CBARA1       | 10 Homo sapiens CALC; EFHA3;  | 0.00178859 | 0.01351741 | 1.31125028 |
| PIP5K1C     | NM_012398.1 PIP5K1C      | 19 Homo sapiens PIP5Kgamma;   | 0.00165935 | 0.01284835 | 1.30812392 |
| MAP3K1      | XM_042066.1 MAP3K1       | 5 Homo sapiens MAPKKK1; ME    | 0.0014389  | 0.01168038 | 1.3052779  |
| PIH1D1      | NM_017916.1 PIH1D1       | 19 Homo sapiens NOP17; FLJ20  | 0.00055868 | 0.00628151 | 1.30492279 |
| VPS16       | NM_080413.1 VPS16        | 20 Homo sapiens hVPS16        | 0.00120653 | 0.01046031 | 1.30336982 |
| COL4A5      | NM_033381.1 COL4A5       | Homo sapiens MGC42377; A      | 0.01020489 | 0.04355312 | 1.30264314 |

### 0.5 ACL-Dependent Upreg

|           |                         |                                  |            |            |            |
|-----------|-------------------------|----------------------------------|------------|------------|------------|
| HIF1AN    | NM_017902.1 HIF1AN      | 10 Homo sapiens DKFZp762F18      | 0.00059067 | 0.00653578 | 1.30103049 |
| CITED2    | NM_006079.3 CITED2      | 6 Homo sapiens P35SRJ; MRGJ      | 2.375E-05  | 0.00080934 | 1.30029566 |
| PHTF1     | NM_006608.1 PHTF1       | 1 Homo sapiens PHTF              | 0.00506024 | 0.02687443 | 1.30002279 |
| OSBPL2    | NM_144498.1 OSBPL2      | 20 Homo sapiens MGC4307; KIA     | 0.0018597  | 0.01383403 | 1.29932281 |
| TMEM132A  | NM_178031.2 TMEM132A    | 11 Homo sapiens DKFZp547E21      | 8.0068E-05 | 0.00173428 | 1.29927478 |
| TMEM106B  | NM_018374.2 TMEM106B    | 7 Homo sapiens FLJ11273; MG      | 0.00256981 | 0.01709252 | 1.29882786 |
| PNPLA2    | NM_020376.2 PNPLA2      | 11 Homo sapiens PEDF-R; FP17     | 0.00145408 | 0.01178919 | 1.29500408 |
| PLOD2     | NM_182943.2 PLOD2       | 3 Homo sapiens LH2; TLH          | 1.8211E-05 | 0.00068775 | 1.29460942 |
| CCPG1     | NM_004748.3 CCPG1       | 15 Homo sapiens KIAA1254; CP     | 0.00384723 | 0.02235814 | 1.29366296 |
| ADD3      | NM_019903.3 ADD3        | 10 Homo sapiens ADDL             | 8.6293E-05 | 0.00184797 | 1.29295207 |
| FER       | NM_005246.1 FER         | 5 Homo sapiens TYK3              | 0.00101324 | 0.00932101 | 1.28988872 |
| FLJ20021  | XM_028217.4 FLJ20021    | 4 PREDICTED: Homo sapiens h      | 4.6451E-05 | 0.00125663 | 1.28954178 |
| AFTPH     | NM_017657.3 AFTPH       | 2 Homo sapiens MGC33965; FI      | 0.00398104 | 0.02290479 | 1.28936861 |
| SEC22B    | NM_004892.3 SEC22B      | 1 Homo sapiens SEC22L1; ERS      | 0.00139582 | 0.01140755 | 1.28895839 |
| HYDIN     | NM_017558.2 HYDIN       | 16 Homo sapiens FLJ14665; KIA    | 0.00471586 | 0.02554696 | 1.28859723 |
| CBX4      | NM_003653.2 CBX4        | 3 Homo sapiens LHP2; PC2; I      | 0.0010001  | 0.00925788 | 1.28812345 |
| PPM1H     | XM_939302.1 PPM1H       | 12 Homo sapiens KIAA1157; FL     | 0.00219603 | 0.01543508 | 1.28769933 |
| RILPL2    | NM_145058.1 RILPL2      | 12 Homo sapiens FLJ30380; MG     | 0.01122872 | 0.04614009 | 1.28748078 |
| LOC340598 | XM_926996.1 LOC340598 X | PREDICTED: Homo sapiens s        | 0.00026802 | 0.00396974 | 1.28742016 |
| HIST1H1C  | NM_005319.3 HIST1H1C    | 6 Homo sapiens MGC3992; HI       | 0.00065875 | 0.00698594 | 1.28736095 |
| C2orf64   | NM_00100821 C2ORF64     | 2 Homo sapiens 6330578E17R       | 0.00088273 | 0.00853494 | 1.28721625 |
| CPSF3L    | NM_017871.3 CPSF3L      | 1 Homo sapiens RC68; RC-68;      | 0.00038061 | 0.00497084 | 1.28713987 |
| RAPGEF2   | NM_014247.2 RAPGEF2     | 4 Homo sapiens RA-GEF; PDZC      | 0.00132076 | 0.01105999 | 1.28649281 |
| PPL       | NM_002705.3 PPL         | 16 Homo sapiens MGC134872; I     | 0.00366058 | 0.02178925 | 1.28640266 |
| PEX16     | NM_004813.1 PEX16       | 11 Homo sapiens peroxisomal bi   | 0.00667146 | 0.03253748 | 1.28638848 |
| FLJ22795  | NM_025084.1 FLJ22795    | 15 Homo sapiens hypothetical p   | 0.00153795 | 0.01223717 | 1.28615868 |
| FAM13B    | NM_00110180 FAM13B      | 5 Homo sapiens KHCHP; MGC5       | 0.00099789 | 0.00925688 | 1.28613331 |
| ANKDD1A   | NM_182703.2 ANKDD1A     | 15 Homo sapiens MGC120306; I     | 0.00039217 | 0.00504224 | 1.28611686 |
| BTBD10    | NM_032320.4 BTBD10      | 11 Homo sapiens MGC13007; G      | 0.0001878  | 0.00309632 | 1.28610786 |
| CDCP1     | NM_022842.3 CDCP1       | 3 Homo sapiens SIMA135; TRA      | 0.00049317 | 0.00582148 | 1.28602895 |
| FUCA1     | NM_000147.2 FUCA1       | 1 Homo sapiens fucosidase, al    | 5.2671E-06 | 0.00031593 | 1.28598802 |
| SNORD3D   | NR_006882.1 SNORD3D     | 17 Homo sapiens U3-4             | 0.00018389 | 0.00306232 | 1.28509046 |
| PMS2L4    | NR_022007.1 PMS2L4      | 7 Homo sapiens postmeiotic se    | 0.00489102 | 0.02614327 | 1.28467802 |
| MXD4      | NM_006454.2 MXD4        | 4 Homo sapiens MSTP149; MAI      | 7.9836E-05 | 0.00174064 | 1.28426371 |
| PTK7      | NM_152880.2 PTK7        | 6 Homo sapiens CCK4              | 0.00170683 | 0.01311634 | 1.28338688 |
| AFF4      | NM_014423.2 AFF4        | 5 Homo sapiens AF5Q31; MGC       | 0.00788997 | 0.03658254 | 1.28289574 |
| RETSAT    | NM_017750.2 RETSAT      | 2 Homo sapiens FLJ20296          | 0.00081833 | 0.00809533 | 1.28278644 |
| KLHL29    | XM_00171745 KLHL29      | 2 PREDICTED: Homo sapiens k      | 0.00048808 | 0.00579233 | 1.28252116 |
| DDB2      | NM_000107.1 DDB2        | 11 Homo sapiens FLJ34321         | 0.00549634 | 0.02854998 | 1.27987752 |
| TPMT      | NM_000367.2 TPMT        | 6 Homo sapiens thiopurine S-n    | 0.00179704 | 0.01355807 | 1.27933    |
| TNFAIP1   | NM_021137.3 TNFAIP1     | 17 Homo sapiens EDP1; B61; B     | 0.0005821  | 0.00646794 | 1.2788571  |
| CSRP1     | NM_004078.1 CSRP1       | 1 Homo sapiens CRP; CRP1; DI     | 5.3021E-05 | 0.00135685 | 1.27884863 |
| RIOK3     | NM_003831.2 RIOK3       | 18 Homo sapiens DKFZp779L13      | 5.8505E-05 | 0.00142826 | 1.27777901 |
| TMC6      | NM_007267.5 TMC6        | 17 Homo sapiens LAK-4P; EVIN     | 0.00058917 | 0.00652466 | 1.27714636 |
| CSRNP2    | NM_030809.1 CSRNP2      | 12 Homo sapiens FLJ25576; C1     | 0.00761306 | 0.03567292 | 1.27594873 |
| RNFT2     | NM_032814.3 RNFT2       | 12 Homo sapiens FLJ14627; TM     | 0.00010367 | 0.0020854  | 1.27586413 |
| EPHA1     | NM_005232.3 EPHA1       | 7 Homo sapiens EPHT; MGC16       | 0.00065777 | 0.00698671 | 1.27502823 |
| LAMB1     | NM_002291.1 LAMB1       | 7 Homo sapiens MGC142015; C      | 0.01095442 | 0.04539288 | 1.27306309 |
| MTMR11    | NM_006697.1 MTMR11      | 1 Homo sapiens CRA; RP11-21      | 0.00341937 | 0.02076368 | 1.27298864 |
| S100A14   | NM_020672.1 S100A14     | 1 Homo sapiens S100A15; BCM      | 0.00094611 | 0.00892008 | 1.27291854 |
| PPP2R5A   | NM_006243.2 PPP2R5A     | 1 Homo sapiens MGC131915; I      | 0.0035419  | 0.02130281 | 1.27218093 |
| PPP1R13L  | NM_006663.2 PPP1R13L    | 19 Homo sapiens IASPP; RAI; iA   | 0.00746666 | 0.03523604 | 1.271619   |
| RAB8B     | NM_016530.2 RAB8B       | 15 Homo sapiens FLJ38125         | 0.00408431 | 0.02326669 | 1.27142901 |
| RND3      | NM_005168.3 RND3        | 2 Homo sapiens RhoE; Rho8; r     | 0.01009636 | 0.04321516 | 1.27088652 |
| HERC1     | NM_003922.2 HERC1       | 15 Homo sapiens p619; p532       | 0.00395736 | 0.02280814 | 1.2707019  |
| KIAA0922  | NM_015196.2 KIAA0922    | 4 Homo sapiens FLJ10592; TM      | 0.00068182 | 0.00713923 | 1.26815333 |
| ABCB6     | NM_005689.1 ABCB6       | 2 Homo sapiens ABC; EST455       | 0.01228402 | 0.04906206 | 1.26763733 |
| KIF3B     | NM_004798.2 KIF3B       | 20 Homo sapiens HH0048; KIAA     | 0.00026279 | 0.00392298 | 1.26730429 |
| TRIM66    | NM_014818.1 TRIM66      | 11 Homo sapiens tripartite motil | 0.00591142 | 0.02980671 | 1.26703324 |
| RNU1G2    | NR_004426.1 RNU1G2      | 1 Homo sapiens U1D2; U1B2;       | 0.00029105 | 0.00417093 | 1.26627992 |
| PDGFRL    | NM_006207.1 PDGFRL      | 8 Homo sapiens PRLTS; PDGRL      | 0.00087288 | 0.00847684 | 1.26446045 |
| RNF43     | NM_017763.3 RNF43       | 17 Homo sapiens FLJ20315; DK     | 0.00821763 | 0.03751131 | 1.26428015 |
| RHBDL3    | NM_138328.2 RHBDL3      | 17 Homo sapiens RHBDL4; FLJ4     | 0.0097152  | 0.04222449 | 1.26251748 |
| TNFRSF25  | NM_148973.1 TNFRSF25    | 1 Homo sapiens WSL-LR; TNFR      | 0.00720285 | 0.0343333  | 1.26103787 |
| GPSM2     | NM_013296.3 GPSM2       | 1 Homo sapiens Pins; LGN         | 3.7689E-05 | 0.00108847 | 1.26096053 |
| NAGK      | NM_017567.2 NAGK        | 2 Homo sapiens GNK; HSA242       | 0.00022196 | 0.00347786 | 1.26017915 |
| ARID3A    | NM_005224.1 ARID3A      | 19 Homo sapiens E2FBP1; BRIG     | 0.00380987 | 0.0222385  | 1.26008135 |
| ENTPD8    | NM_198585.1 ENTPD8      | 9 Homo sapiens GLSR2492; UN      | 0.00362919 | 0.02165102 | 1.25892305 |
| TMEM184B  | NM_012264.3 TMEM184B    | 22 Homo sapiens DKFZp686N11      | 0.0014919  | 0.01200039 | 1.25699796 |
| SULT1A3   | NM_177552.2 SULT1A3     | 16 Homo sapiens MGC117469; I     | 0.00480977 | 0.025918   | 1.25672351 |

### 0.5 ACL-Dependent Upreg

|           |             |           |    |              |                          |            |            |            |
|-----------|-------------|-----------|----|--------------|--------------------------|------------|------------|------------|
| BICD2     | NM_00100380 | BICD2     | 9  | Homo sapiens | bA526D8.1; K             | 0.00722618 | 0.03439508 | 1.25530086 |
| ZNF544    | NM_014480.1 | ZNF544    | 19 | Homo sapiens | zinc finger pro          | 0.00122835 | 0.01058022 | 1.25464025 |
| CYB5D2    | NM_144611.2 | CYB5D2    | 17 | Homo sapiens | MGC32124                 | 0.00253361 | 0.01693672 | 1.2545042  |
| KIF1B     | NM_183416.2 | KIF1B     | 1  | Homo sapiens | KIAA0591; HM             | 0.00195097 | 0.01422554 | 1.25286549 |
| CLEC16A   | NM_015226.1 | CLEC16A   | 16 | Homo sapiens | KIAA0350; Go             | 0.00088524 | 0.0085406  | 1.25270107 |
| INSIG2    | NM_016133.2 | INSIG2    | 2  | Homo sapiens | MGC26273                 | 0.00154594 | 0.01227858 | 1.25234811 |
| MTMR14    | NM_022485.2 | MTMR14    | 3  | Homo sapiens | FLJ22405; C3c            | 0.00061955 | 0.0067098  | 1.25170535 |
| PRAF2     | NM_007213.1 | PRAF2     |    | Homo sapiens | JM4                      | 0.00217416 | 0.01531388 | 1.25124914 |
| CDH1      | NM_004360.2 | CDH1      | 16 | Homo sapiens | CDHE; Arc-1;             | 2.6155E-06 | 0.00020761 | 1.25018084 |
| KLF4      | NM_004235.3 | KLF4      | 9  | Homo sapiens | GKLF; EZF                | 0.00571816 | 0.02915384 | 1.24985026 |
| GSR       | NM_000637.2 | GSR       | 8  | Homo sapiens | MGC78522                 | 0.00550813 | 0.02858877 | 1.24918367 |
| DDEF2     | NM_003887.1 | DDEF2     | 2  | Homo sapiens | PAG3; Pap- $\alpha$ p    | 0.00366424 | 0.02180122 | 1.24863709 |
| SND1      | NM_014390.2 | SND1      | 7  | Homo sapiens | TDRD11; p10C             | 4.8543E-05 | 0.00128441 | 1.24851831 |
| STAT2     | NM_005419.2 | STAT2     | 12 | Homo sapiens | ISGF-3; STAT1            | 4.9614E-05 | 0.00130492 | 1.24830846 |
| CYB561D1  | NM_182580.2 | CYB561D1  | 1  | Homo sapiens | cytochrome b-            | 0.00272388 | 0.01775209 | 1.24822366 |
| TTC15     | NM_016030.5 | TTC15     | 2  | Homo sapiens | FLJ36862; CG             | 0.00602732 | 0.03025298 | 1.24734342 |
| TBC1D7    | NM_016495.2 | TBC1D7    | 6  | Homo sapiens | DKFZp686N23              | 0.00611667 | 0.03065503 | 1.24460786 |
| RRM2B     | NM_015713.3 | RRM2B     | 8  | Homo sapiens | DKFZp686M05              | 0.00435335 | 0.02435963 | 1.24210331 |
| TMEM63B   | NM_018426.1 | TMEM63B   | 6  | Homo sapiens | DKFZp686N22              | 0.00527222 | 0.02766766 | 1.2415137  |
| LIPA      | NM_000235.2 | LIPA      | 10 | Homo sapiens | CESD; LAL                | 4.6766E-06 | 0.00296262 | 1.23986735 |
| HNRPLL    | NM_138394.2 | HNRPLL    | 2  | Homo sapiens | SRRF                     | 0.00313036 | 0.01950003 | 1.23978234 |
| ANG       | NM_001145.2 | ANG       | 14 | Homo sapiens | RNASE5; MGC              | 0.00191272 | 0.01407828 | 1.23942312 |
| VAT1      | NM_006373.2 | VAT1      | 17 | Homo sapiens | FLJ20230; VA             | 9.6422E-06 | 0.00045325 | 1.2392313  |
|           |             | Hs.363526 | 8  | Homo sapiens | cDNA clone IM            | 0.00051395 | 0.00596574 | 1.23885058 |
| CD99      | NM_002414.3 | CD99      |    | Homo sapiens | MIC2; MIC2Y;             | 0.00074147 | 0.00756655 | 1.2385618  |
| TNS3      | NM_022748.9 | TNS3      | 7  | Homo sapiens | TENS1; FLJ13             | 0.00312332 | 0.01946532 | 1.23807121 |
|           |             | Hs.572219 |    |              | CM3-MT0357-260101-690-b- | 0.0058081  | 0.02949891 | 1.2380611  |
| CREG1     | NM_003851.2 | CREG1     | 1  | Homo sapiens | CREG                     | 2.0688E-05 | 0.00074521 | 1.2378929  |
| ZNF277    | NM_021994.1 | ZNF277    | 7  | Homo sapiens | FLJ9277P; ZNF            | 6.3781E-05 | 0.00152339 | 1.237046   |
| DIRC2     | NM_032839.1 | DIRC2     | 3  | Homo sapiens | FLJ14784; RC             | 0.00067963 | 0.00712188 | 1.23663349 |
| CPE       | NM_001873.1 | CPE       | 4  | Homo sapiens | carboxypeptid            | 0.00240123 | 0.01629835 | 1.23622501 |
| LMBRD1    | NM_018368.2 | LMBRD1    | 6  | Homo sapiens | bA810I22.1; F            | 0.00015167 | 0.00268785 | 1.23457318 |
| MED19     | NM_153450.1 | MED19     | 11 | Homo sapiens | LCMR1                    | 0.00165795 | 0.01234496 | 1.23416562 |
| CCDC128   | NM_152994.2 | CCDC128   | 2  | Homo sapiens | MGC111781; I             | 0.00672636 | 0.03270894 | 1.23345409 |
| SELM      | NM_080430.2 | SELM      | 22 | Homo sapiens | MGC40146; SI             | 0.00194893 | 0.01421849 | 1.23331652 |
| SNAPC2    | NM_003083.1 | SNAPC2    | 19 | Homo sapiens | PTFdelta; SNA            | 0.00053343 | 0.00613287 | 1.23323082 |
| SEZ6L2    | NM_201575.1 | SEZ6L2    |    | Homo sapiens | FLJ90517; PSI            | 0.00341107 | 0.02074183 | 1.23088447 |
| CAT       | NM_001752.2 | CAT       | 11 | Homo sapiens | MGC138424; I             | 0.00041787 | 0.00525048 | 1.2330766  |
| PSCD1     | NM_017456.1 | PSCD1     | 17 | Homo sapiens | D17S811E; B2             | 0.0001035  | 0.002085   | 1.23198644 |
| GRAMD1A   | NM_020895.2 | GRAMD1A   | 19 | Homo sapiens | FLJ90346; FLJ            | 0.00037916 | 0.00496653 | 1.23188949 |
| RNU1A3    | NR_004430.1 | RNU1A3    | 1  | Homo sapiens | FLJ90517; U1A1           | 0.00026099 | 0.00390919 | 1.23159564 |
| YIF1B     | NM_00103173 | YIF1B     | 19 | Homo sapiens | FinGER8                  | 0.0001745  | 0.00296558 | 1.22940745 |
| ETFDH     | NM_004453.1 | ETFDH     | 4  | Homo sapiens | MADD; ETFQO              | 0.01021698 | 0.04357668 | 1.2293979  |
| JAG1      | NM_000214.1 | JAG1      | 20 | Homo sapiens | CD339; AWS;              | 0.0102798  | 0.04369    | 1.22876083 |
| BCOR      | NM_017745.4 | BCOR      |    | Homo sapiens | MGC131961; I             | 0.00747853 | 0.03525442 | 1.22829333 |
| PDCD6IP   | NM_013374.3 | PDCD6IP   | 3  | Homo sapiens | MGC17003; AI             | 0.00435001 | 0.02435123 | 1.2278777  |
| TRPM4     | NM_017636.2 | TRPM4     | 19 | Homo sapiens | FLJ20041; TRI            | 0.0015605  | 0.01237203 | 1.22606847 |
| MST1      | NM_020998.2 | MST1      | 3  | Homo sapiens | HGFL; NF15S2             | 0.00417738 | 0.02364448 | 1.22546819 |
| PTEN      | NM_000314.3 | PTEN      | 10 | Homo sapiens | MMAC1; MHAN              | 0.00051509 | 0.00596853 | 1.22441214 |
| LHPP      | NM_022126.2 | LHPP      | 10 | Homo sapiens | MGC142189; I             | 2.6668E-05 | 0.00086434 | 1.22430127 |
| MAP2K2    | NM_030662.2 | MAP2K2    | 19 | Homo sapiens | PRKMK2; MAP              | 0.00238142 | 0.01625546 | 1.22404008 |
| CACNB3    | NM_000725.2 | CACNB3    | 12 | Homo sapiens | CACNLB3                  | 1.2724E-05 | 0.00054062 | 1.22390329 |
| ALDH2     | NM_000690.2 | ALDH2     | 12 | Homo sapiens | ALDM; ALDH-I             | 0.00376355 | 0.02206528 | 1.2221394  |
| GPAA1     | NM_003801.2 | GPAA1     | 8  | Homo sapiens | hGAA1; GAA1              | 0.00032997 | 0.0045047  | 1.2206939  |
| GABARAPL1 | NM_031412.2 | GABARAPL1 | 12 | Homo sapiens | ATG8L; GEC1;             | 0.00131754 | 0.01105401 | 1.22061716 |
| RGS2      | NM_002923.1 | RGS2      | 1  | Homo sapiens | GOS8                     | 0.00016778 | 0.00289599 | 1.21990933 |
| APBB3     | NM_006051.2 | APBB3     | 5  | Homo sapiens | MGC87674; SI             | 0.00011581 | 0.00224121 | 1.21823203 |
| CABC1     | NM_020247.3 | CABC1     | 1  | Homo sapiens | MGC4849; CO              | 0.00023224 | 0.00359651 | 1.21787111 |
| BCDIN3D   | NM_181708.1 | BCDIN3D   | 12 | Homo sapiens | BCDIN3 doma              | 0.00140867 | 0.01149124 | 1.21774205 |
|           | Hs.27048    | Hs.27048  | 12 | Homo sapiens | cDNA FLJ3175             | 0.00577395 | 0.02935922 | 1.21702779 |
| NLGN2     | NM_020795.2 | NLGN2     | 17 | Homo sapiens | KIAA1366                 | 0.00226052 | 0.01564774 | 1.21679714 |
| TAF7      | NM_005642.2 | TAF7      | 5  | Homo sapiens | TAFI155; TAF2            | 0.0118544  | 0.04798228 | 1.21614837 |
| ESPN      | NM_031475.1 | ESPN      | 1  | Homo sapiens | DKFZP434A19              | 0.00481646 | 0.02593298 | 1.21598707 |
| MFGES     | NM_005928.1 | MFGES     | 15 | Homo sapiens | HsT19888; BA             | 2.986E-06  | 0.00023013 | 1.21582585 |
| CPVL      | NM_031311.3 | CPVL      | 7  | Homo sapiens | HVLP; MGC10              | 0.00337218 | 0.02054305 | 1.2155547  |
| LPCAT3    | NM_005768.5 | LPCAT3    | 12 | Homo sapiens | C3F; OACT5; r            | 5.9579E-05 | 0.00144913 | 1.21512547 |
| SPATA20   | NM_022827.2 | SPATA20   | 17 | Homo sapiens | MGC111032; I             | 0.00483812 | 0.02600733 | 1.21414682 |
| TM9SF3    | NM_020123.2 | TM9SF3    | 10 | Homo sapiens | RP11-34E5.1;             | 0.01236121 | 0.04926646 | 1.21405818 |
| RNF31     | NM_017999.3 | RNF31     | 14 | Homo sapiens | FLJ23501; MG             | 0.00224402 | 0.0155987  | 1.21102339 |
| GATAD2B   | NM_020699.1 | GATAD2B   | 1  | Homo sapiens | MGC138285; I             | 0.00935472 | 0.04104804 | 1.21091684 |

### 0.5 ACL-Dependent Upreg

|             |             |             |    |                           |                 |            |             |            |
|-------------|-------------|-------------|----|---------------------------|-----------------|------------|-------------|------------|
| C6orf85     | NM_021945.4 | C6ORF85     | 6  | Homo sapiens              | DKFZP434F01     | 0.00308189 | 0.01930698  | 1.21002402 |
| ZBTB48      | NM_005341.1 | ZBTB48      | 1  | Homo sapiens              | pp9964; HKR3    | 0.00399775 | 0.02295115  | 1.21000566 |
| RICS        | NM_014715.2 | RICS        | 11 | Homo sapiens              | KIAA0712; MC    | 0.01076083 | 0.0449136   | 1.2094009  |
| CHES1       | NM_005197.2 | CHES1       | 14 | Homo sapiens              | C14orf116; FC   | 0.00108681 | 0.0097541   | 1.20856818 |
| NPC1        | NM_000271.1 | NPC1        | 18 | Homo sapiens              | NPC             | 0.000168   | 0.00289228  | 1.20769839 |
| NKX3-1      | NM_006167.2 | NKX3-1      | 8  | Homo sapiens              | NKX3A; BAPX;    | 0.00664853 | 0.03249741  | 1.20753125 |
| C1orf97     | NM_032705.2 | C1ORF97     | 1  | Homo sapiens              | MGC14801; FI    | 0.00108534 | 0.00975407  | 1.20628886 |
| HLTF        | NM_003071.2 | HLTF        | 3  | Homo sapiens              | ZBU1; SMARC     | 0.00017915 | 0.0030137   | 1.20623971 |
| LOC643431   | XM_928128.1 | LOC643431   | 5  | PREDICTED: Homo sapiens s |                 | 8.0009E-05 | 0.00173868  | 1.20595913 |
| KIFAP3      | NM_014970.2 | KIFAP3      | 1  | Homo sapiens              | SMAP; Smg-G     | 0.01261645 | 0.04992347  | 1.20528951 |
| RTN3        | NM_201428.1 | RTN3        | 11 | Homo sapiens              | NSPLI2; NSPL2   | 0.0020804  | 0.01493921  | 1.20526902 |
| OCEL1       | NM_024578.1 | OCEL1       | 19 | Homo sapiens              | S863-9; FLJ22   | 0.00047266 | 0.00569604  | 1.20518536 |
| HLA-H       | NR_001434.1 | HLA-H       | 6  | Homo sapiens              | HLAHP           | 6.8041E-05 | 0.00157683  | 1.20509753 |
| ZBTB4       | NM_020899.2 | ZBTB4       | 17 | Homo sapiens              | KAIS0-L1; KIA   | 0.00448075 | 0.02472805  | 1.20468628 |
| PPDPF       | NM_024299.2 | PPDPF       | 20 | Homo sapiens              | dJ697K14.9; F   | 0.00541146 | 0.02820855  | 1.20437067 |
| NPTN        | NM_012428.1 | NPTN        | 15 | Homo sapiens              | SDFR1; GP55;    | 3.458E-06  | 0.00025049  | 1.20388353 |
| HINT2       | NM_032593.2 | HINT2       | 9  | Homo sapiens              | HIT-17          | 0.00100456 | 0.00926688  | 1.20325887 |
| MANBA       | NM_005908.2 | MANBA       | 4  | Homo sapiens              | MANB1           | 0.001789   | 0.0135128   | 1.20323153 |
| LOC10013279 | XR_036994.1 | LOC10013279 |    | PREDICTED: Homo sapiens n |                 | 0.00371922 | 0.02191201  | 1.20198156 |
| SNORA12     | NR_002954.1 | SNORA12     | 10 | Homo sapiens              | U108            | 1.6037E-06 | 0.00016353  | 1.200512   |
| UBE2E2      | NM_152653.1 | UBE2E2      | 3  | Homo sapiens              | UBCH8; FLJ25    | 0.00379371 | 0.02217347  | 1.20045921 |
| NUAK1       | NM_014840.2 | NUAK1       | 12 | Homo sapiens              | KIAA0537; AR    | 0.01208386 | 0.04848175  | 1.20035706 |
| FES         | NM_002005.2 | FES         | 15 | Homo sapiens              | FPS             | 0.00255862 | 0.01704378  | 1.20011617 |
| THOC2       | NM_020449.1 | THOC2       |    | Homo sapiens              | CXorf3; dJ506   | 0.00197608 | 0.01435338  | 1.19991208 |
| MGC72104    | NM_207350.1 | MGC72104    | 20 | Homo sapiens              | similar to FRG  | 0.01078043 | 0.04493878  | 1.19939738 |
| INTS5       | NM_030628.1 | INTS5       | 11 | Homo sapiens              | INT5; KIAA16    | 0.00300846 | 0.01893644  | 1.19760153 |
| ITGA5       | NM_002205.2 | ITGA5       | 12 | Homo sapiens              | CD49e; VLA5A    | 0.00577367 | 0.02936904  | 1.19737849 |
| UPLP        | NM_00111440 | UPLP        |    | Homo sapiens              | uropalakin-like | 0.00239233 | 0.01628798  | 1.19650117 |
| PTPRA       | NM_002836.2 | PTPRA       | 20 | Homo sapiens              | HPTPalpha; RF   | 0.01157118 | 0.04713816  | 1.19633773 |
| PRKAG1      | NM_002733.3 | PRKAG1      | 12 | Homo sapiens              | AMPKG; MGC8     | 0.01213947 | 0.04863124  | 1.19629841 |
| CALU        | NM_001219.2 | CALU        | 7  | Homo sapiens              | FLJ90608        | 0.00028282 | 0.00409293  | 1.19535892 |
| SOX4        | NM_003107.2 | SOX4        | 6  | Homo sapiens              | EVI16           | 4.1359E-05 | 0.00116154  | 1.19505446 |
| TRIM2       | NM_015271.2 | TRIM2       | 4  | Homo sapiens              | KIAA0517; RN    | 0.00406598 | 0.023020217 | 1.19437155 |
| MLXIPL      | NM_032994.1 | MLXIPL      | 7  | Homo sapiens              | WS-bHLH; MI     | 0.00280155 | 0.01809812  | 1.19398536 |
| SUMF1       | NM_182760.2 | SUMF1       | 3  | Homo sapiens              | MGC131853; I    | 0.00819665 | 0.03746717  | 1.19375444 |
| ID2         | NM_002166.4 | ID2         | 2  | Homo sapiens              | GIG8; MGC26     | 2.0165E-05 | 0.00073842  | 1.19343035 |
| EVI5L       | NM_145245.2 | EVI5L       | 19 | Homo sapiens              | ecotropic viral | 0.00259048 | 0.01721273  | 1.19303971 |
| LIMA1       | NM_016357.3 | LIMA1       | 12 | Homo sapiens              | SREBP3; EPLI    | 0.00250371 | 0.01681317  | 1.19213284 |
| CDK6        | NM_001259.5 | CDK6        | 7  | Homo sapiens              | PLSTIRE; MGC    | 0.0003867  | 0.00500591  | 1.19152913 |
|             | Hs.14555    | Hs.14555    | 10 | Homo sapiens              | cDNA: FLJ215    | 0.0035877  | 0.02148081  | 1.19143749 |
| LRRC1       | NM_025168.1 | LRRC1       | 6  | Homo sapiens              | dJ23E19.1; L    | 0.01171466 | 0.04756189  | 1.19119985 |
| NTAN1       | NM_173474.2 | NTAN1       | 16 | Homo sapiens              | DKFZp666E05     | 0.00584956 | 0.02963001  | 1.19082666 |
| AGBL5       | NM_021831.5 | AGBL5       | 2  | Homo sapiens              | FLJ21839        | 0.00133508 | 0.01108886  | 1.18944773 |
| SKA2        | NM_182620.3 | SKA2        | 17 | Homo sapiens              | MGC110975; S    | 0.00021285 | 0.00338313  | 1.18892166 |
| UBXN6       | NM_025241.1 | UBXN6       | 19 | Homo sapiens              | DKFZp667D10     | 0.00431522 | 0.02419734  | 1.18804706 |
| SMAD5       | NM_005903.5 | SMAD5       | 5  | Homo sapiens              | Dwfc; DKFZp7    | 0.00060163 | 0.00660752  | 1.18798944 |
| TPST2       | NM_00100856 | TPST2       | 22 | Homo sapiens              | tyrosylprotein  | 0.01073296 | 0.04483962  | 1.18789988 |
| ZFYVE19     | NM_032850.3 | ZFYVE19     | 15 | Homo sapiens              | FLJ14840; MP    | 0.01121487 | 0.04612608  | 1.18778134 |
| ELOF1       | NM_032377.2 | ELOF1       | 19 | Homo sapiens              | ELF1            | 0.00314832 | 0.0196027   | 1.18764535 |
| AGRN        | NM_198576.2 | AGRN        | 1  | Homo sapiens              | FLJ45064        | 0.01126993 | 0.04623774  | 1.18650676 |
| OSBPL10     | NM_017784.3 | OSBPL10     | 3  | Homo sapiens              | ORP10; FLJ20    | 0.00717002 | 0.03426307  | 1.18613786 |
| RDX         | NM_002906.3 | RDX         | 11 | Homo sapiens              | radixin (RDX),  | 0.00060611 | 0.00664011  | 1.18600047 |
| PPOX        | NM_000309.2 | PPOX        | 1  | Homo sapiens              | MGC8485; VP;    | 0.0111686  | 0.04602144  | 1.18514511 |
| DYNLL2      | NM_080677.1 | DYNLL2      | 17 | Homo sapiens              | MGC17810; D     | 0.0003913  | 0.00503597  | 1.18501765 |
| STOM        | NM_004099.4 | STOM        | 9  | Homo sapiens              | EPB7; EPB72;    | 0.00489563 | 0.02614686  | 1.18496348 |
| HEBP1       | NM_015987.3 | HEBP1       | 12 | Homo sapiens              | HBP; HEBP       | 0.00030114 | 0.00426483  | 1.184792   |
| MEF2D       | NM_005920.2 | MEF2D       | 1  | Homo sapiens              | DKFZp686I15     | 0.00151718 | 0.01215208  | 1.18417022 |
| MID1        | NM_033290.1 | MID1        |    | Homo sapiens              | RNF59; OGS1;    | 0.01226047 | 0.04904189  | 1.18404279 |
| FAM117B     | NM_173511.2 | FAM117B     | 2  | Homo sapiens              | FLJ38771; DK    | 0.00236836 | 0.01619971  | 1.18367214 |
| TSPAN5      | NM_005723.2 | TSPAN5      | 4  | Homo sapiens              | TSPAN-5; TM4    | 0.00038057 | 0.00497519  | 1.18356764 |
| C16orf56    | NM_025082.1 | C16ORF56    | 16 | Homo sapiens              | FLJ13111        | 0.0032861  | 0.02017624  | 1.18355121 |
| ZFAND6      | NM_019006.2 | ZFAND6      | 15 | Homo sapiens              | ZA20D3; AWP     | 0.00633297 | 0.03144191  | 1.18283852 |
| NME7        | NM_013330.3 | NME7        | 1  | Homo sapiens              | nm23-H7; FLJ    | 0.00415371 | 0.02358097  | 1.18237421 |
| NSFL1C      | NM_182483.1 | NSFL1C      | 20 | Homo sapiens              | UBXD10; p47;    | 0.0045183  | 0.02486283  | 1.18221204 |
| STX1A       | NM_004603.1 | STX1A       | 7  | Homo sapiens              | HPC-1; STX1;    | 0.0029987  | 0.01890196  | 1.18195635 |
| NECAP2      | NM_018090.3 | NECAP2      | 1  | Homo sapiens              | FLJ10420; RP2   | 0.00088434 | 0.00853813  | 1.18177362 |
| GRN         | NM_002087.2 | GRN         | 17 | Homo sapiens              | PEPI; PGRN; P   | 0.00195969 | 0.01428129  | 1.18123077 |
| MTIF3       | NM_152912.3 | MTIF3       | 13 | Homo sapiens              | IF-3mt; IF3(m   | 0.0006285  | 0.00677902  | 1.18107077 |
| MMD         | NM_012329.2 | MMD         | 17 | Homo sapiens              | PAQR11; MMA     | 3.2501E-05 | 0.0009859   | 1.18079507 |
| LOC730324   | XM_00172209 | LOC730324   | 7  | PREDICTED: Homo sapiens h |                 | 0.01183759 | 0.04792887  | 1.17990551 |

### 0.5 ACL-Dependent Upreg

|             |                         |                               |            |            |            |
|-------------|-------------------------|-------------------------------|------------|------------|------------|
| CMTM6       | NM_017801.2 CMTM6       | 3 Homo sapiens FLJ20396; CKI  | 0.00010709 | 0.00212198 | 1.17938479 |
| C14orf93    | NM_021944.1 C14ORF93    | 14 Homo sapiens FLJ12154      | 0.010356   | 0.04387316 | 1.17938448 |
| CTGLF7      | XM_00171478 CTGLF7      | 10 PREDICTED: Homo sapiens c  | 2.4832E-05 | 0.00082294 | 1.17863124 |
| ALDOC       | NM_000165.2 ALDOC       | 17 Homo sapiens ALDOC         | 2.6587E-05 | 0.00086382 | 1.17829055 |
| SPRED2      | NM_181784.1 SPRED2      | 2 Homo sapiens MGC163164; I   | 0.01167021 | 0.04745406 | 1.17820656 |
| MAOB        | NM_000898.3 MAOB        | Homo sapiens MGC26382         | 0.000878   | 0.00850785 | 1.17817951 |
| IGFBP2      | NM_000597.2 IGFBP2      | 2 Homo sapiens IGF-BP53; IBF  | 0.00034763 | 0.00466417 | 1.1779265  |
|             | Hs.531457 HS.531457     | 9 Homo sapiens cDNA FLJ3759   | 0.00713888 | 0.03415121 | 1.17774721 |
| LOC649076   | XR_018338.2 LOC649076   | PREDICTED: Homo sapiens n     | 0.00156224 | 0.01237837 | 1.17771402 |
| EPHX2       | NM_001979.4 EPHX2       | 8 Homo sapiens SEH; CEH       | 0.00407884 | 0.0232455  | 1.17730645 |
| HIST1H2BK   | NM_080593.1 HIST1H2BK   | 6 Homo sapiens MGC131989; I   | 9.5392E-05 | 0.0019758  | 1.17598563 |
| LOC646723   | NM_199187.1 LOC646723   | 5 PREDICTED: Homo sapiens s   | 5.7643E-05 | 0.00141767 | 1.17564885 |
| TANC1       | NM_033394.1 TANC1       | 2 Homo sapiens ROLSB; TANC;   | 0.00445568 | 0.02464102 | 1.17481645 |
| LOC730455   | NM_015027.1 LOC730455   | PREDICTED: Homo sapiens s     | 0.00239174 | 0.01629232 | 1.17418604 |
| PAC SIN2    | NM_007229.2 PAC SIN2    | 22 Homo sapiens SDPII         | 5.0947E-05 | 0.00132422 | 1.17364506 |
| ENDOD1      | XM_943187.1 ENDOD1      | 11 Homo sapiens MGC88092; KI  | 0.01197456 | 0.0026231  | 1.17345609 |
| DPYSL3      | NM_001387.2 DPYSL3      | 5 Homo sapiens DRP3; CRMP4;   | 0.00019797 | 0.00320811 | 1.17329799 |
| TBPL1       | NM_004865.2 TBPL1       | 6 Homo sapiens TRF2; STUD; I  | 0.00012963 | 0.002434   | 1.17125582 |
| TCF7L2      | NM_030756.1 TCF7L2      | 10 Homo sapiens TCF-4; TCF4   | 0.01139555 | 0.04665208 | 1.17080398 |
|             | Hs.575583 HS.575583     | 8 602538216F1 NIH_MGC_59 I    | 0.01005549 | 0.0431517  | 1.17066749 |
| CD9         | NM_001769.2 CD9         | 12 Homo sapiens MRP-1; MIC3;  | 0.00075986 | 0.00768321 | 1.16982684 |
| LOC729843   | NM_012477.2 LOC729843   | 2 PREDICTED: Homo sapiens s   | 0.00012714 | 0.0023974  | 1.16942593 |
| EAF1        | NM_033083.5 EAF1        | 3 Homo sapiens ELL associatec | 0.00278343 | 0.01804264 | 1.16934064 |
| INTS12      | NM_020395.2 INTS12      | 4 Homo sapiens PHF22; INT12   | 0.00038268 | 0.00497822 | 1.16924968 |
| PDE6D       | NM_002601.2 PDE6D       | 2 Homo sapiens PDED           | 0.00104451 | 0.00951615 | 1.16901352 |
| CPNE1       | NM_003915.2 CPNE1       | 20 Homo sapiens CPN1; COPN1;  | 0.00011348 | 0.00221223 | 1.1684906  |
| CLSTN1      | NM_00100956 CLSTN1      | 1 Homo sapiens CSTN1; PIK3C   | 0.00027489 | 0.00402644 | 1.16824736 |
| LCOR        | NM_032440.1 LCOR        | 10 Homo sapiens FLJ38026; MLI | 0.00042905 | 0.00533538 | 1.1682299  |
| FERMT2      | NM_006832.1 FERMT2      | 14 Homo sapiens GALK; FLJ44   | 0.00253638 | 0.01693813 | 1.16749355 |
| FAHD2B      | NM_199336.1 FAHD2B      | 2 Homo sapiens DKFZp434N06    | 0.00291107 | 0.01853466 | 1.1666571  |
| BIRC2       | NM_001166.3 BIRC2       | 11 Homo sapiens API1; Hiap-2; | 0.00612247 | 0.03067251 | 1.16643391 |
| SPG11       | NM_025137.2 SPG11       | 15 Homo sapiens KIAA1840; DK  | 0.00362759 | 0.02165122 | 1.16608979 |
| MAPRE2      | NM_014268.1 MAPRE2      | 18 Homo sapiens RP1; EB1; EB2 | 0.00175394 | 0.01334685 | 1.16552252 |
| ACSL3       | NM_004457.3 ACSL3       | 2 Homo sapiens PRO2194; FAC   | 0.00032039 | 0.0044287  | 1.16523309 |
| CENPF       | NM_016343.3 CENPF       | 1 Homo sapiens PRO1779; hcp   | 0.0001569  | 0.00274023 | 1.16517241 |
| MYO10       | NM_012334.1 MYO10       | 5 Homo sapiens KIAA0799; MC   | 0.01010149 | 0.04322315 | 1.16498887 |
| GALK1       | NM_000154.1 GALK1       | 17 Homo sapiens GALK; GK1     | 1.3905E-05 | 0.00057067 | 1.16478353 |
| CDC42       | NM_044472.1 CDC42       | 1 Homo sapiens CDC42Hs; G2!   | 0.00347502 | 0.02101497 | 1.16419603 |
| RABEP1      | NM_004703.3 RABEP1      | 17 Homo sapiens RABPT5; RAB!  | 0.00113512 | 0.01005155 | 1.1640561  |
| SUPT5H      | NM_003169.2 SUPT5H      | 19 Homo sapiens SPT5H; SPT5;  | 0.00225576 | 0.01563113 | 1.16402837 |
| FBXO33      | NM_203301.1 FBXO33      | 14 Homo sapiens c14_5247; Fb; | 0.00127721 | 0.01080455 | 1.16344867 |
| STK38       | NM_007271.2 STK38       | 6 Homo sapiens NDR1; NDR      | 0.0088297  | 0.03948939 | 1.16342971 |
| PI4KAP2     | NM_199345.2 PI4KAP2     | Homo sapiens FLJ44912; MG     | 0.0001012  | 0.00205747 | 1.16331412 |
| LAPTM4A     | NM_014713.3 LAPTM4A     | 2 Homo sapiens LAPTM4A; KIAA  | 0.00566899 | 0.02901473 | 1.16322376 |
| TEX2        | NM_018469.3 TEX2        | 17 Homo sapiens KIAA1738; TM  | 0.00204015 | 0.01472195 | 1.16318665 |
| PDRG1       | NM_030815.2 PDRG1       | 20 Homo sapiens PDRG; C20orf  | 0.01149581 | 0.04693209 | 1.16122581 |
| SCAND1      | NM_033630.1 SCAND1      | 20 Homo sapiens RAZ1; SDP1    | 0.00688966 | 0.03324695 | 1.16121191 |
| BRSK1       | NM_032430.1 BRSK1       | 19 Homo sapiens KIAA1811; FL  | 0.00760795 | 0.03566161 | 1.16116369 |
| DGCR2       | NM_005137.1 DGCR2       | 22 Homo sapiens SEZ-12; IDD;  | 0.0107558  | 0.04490675 | 1.16083029 |
| NCOR2       | NM_006312.2 NCOR2       | 12 Homo sapiens TNRC14; SMR   | 0.00085239 | 0.00832663 | 1.15916634 |
| UROS        | NM_000375.1 UROS        | 10 Homo sapiens uroporphyrino | 0.00013891 | 0.00255391 | 1.15771117 |
| MAN1B1      | NM_016219.2 MAN1B1      | 9 Homo sapiens MANA-ER        | 0.00045632 | 0.0055495  | 1.1574567  |
| SPIRE1      | NM_020148.1 SPIRE1      | 18 Homo sapiens Spir-1; MGC1! | 0.00248924 | 0.01674145 | 1.15579012 |
| HSD17B10    | NM_004493.2 HSD17B10    | Homo sapiens HCD2; ABAD;      | 0.00759024 | 0.03560377 | 1.15573929 |
| LOC401676   | XR_037812.1 LOC401676   | PREDICTED: Homo sapiens n     | 0.00584723 | 0.02962954 | 1.1556875  |
| EHBPL1      | NM_00109940 EHBPL1      | 11 Homo sapiens FLJ35431; TA! | 0.00808304 | 0.03715285 | 1.15563538 |
| NR4A2       | NM_006186.2 NR4A2       | 2 Homo sapiens RNR1; NOT; T.  | 0.00504375 | 0.02680831 | 1.15462605 |
| LOC10013453 | XR_039501.1 LOC10013453 | 7 PREDICTED: Homo sapiens n   | 0.00023265 | 0.00359447 | 1.15410565 |
| SOX9        | NM_000346.2 SOX9        | 17 Homo sapiens CMPD1; CMD1   | 6.2878E-05 | 0.00150725 | 1.15387005 |
| C15orf57    | NM_052849.2 C15ORF57    | 15 Homo sapiens MGC20481; FL  | 0.01053484 | 0.04433328 | 1.15354115 |
| FAM89B      | NM_152832.1 FAM89B      | 11 Homo sapiens MTRV1         | 0.00061036 | 0.00667569 | 1.15348034 |
| NELF        | NM_015537.3 NELF        | 9 Homo sapiens RP11-48C7.1;   | 0.00181776 | 0.01366777 | 1.15322793 |
| LOC728014   | XM_946270.1 LOC728014   | 12 PREDICTED: Homo sapiens s  | 0.00235556 | 0.0161371  | 1.15239721 |
| IFI27L2     | NM_032036.2 IFI27L2     | 14 Homo sapiens TLH29; MGC4   | 0.00750311 | 0.03532005 | 1.15227506 |
| IGF2R       | NM_000876.1 IGF2R       | 6 Homo sapiens M6P-R; CD22    | 0.00031879 | 0.00441581 | 1.15226647 |
| C20orf3     | NM_020531.2 C20ORF3     | 20 Homo sapiens BSCV; APMAP   | 0.00073132 | 0.00749178 | 1.15201875 |
| OSTF1       | NM_012383.3 OSTF1       | 9 Homo sapiens bA235014.1;    | 0.00151042 | 0.01212727 | 1.15179112 |
| CCDC45      | NM_138363.1 CCDC45      | 17 Homo sapiens DKFZp667E18   | 0.00449085 | 0.02476317 | 1.15149741 |
| DYM         | NM_017653.2 DYM         | 18 Homo sapiens DMC; SMC; FL  | 0.0028146  | 0.01812942 | 1.15135296 |
| ZCCHC17     | NM_016505.2 ZCCHC17     | 1 Homo sapiens pNO40; PS1D;   | 0.00055123 | 0.00625604 | 1.15122524 |

## 0.5 ACL-Dependent Upreg

|           |                       |                                 |            |            |            |
|-----------|-----------------------|---------------------------------|------------|------------|------------|
| SPTAN1    | NM_003127.1 SPTAN1    | 9 Homo sapiens FLJ44613; (AL    | 0.00865937 | 0.03903048 | 1.15078089 |
| POR       | NM_000941.1 POR       | 7 Homo sapiens CPR; FLJ26461    | 0.01065356 | 0.04463452 | 1.15028716 |
| MTE       | NM_175621.2 MTE       | Homo sapiens MT1I               | 7.5858E-06 | 0.00038676 | 1.14926651 |
| C4orf34   | NM_174921.1 C4ORF34   | 4 Homo sapiens FLJ13289         | 0.00022353 | 0.0034779  | 1.14889506 |
| PIK4CA    | NM_058004.1 PIK4CA    | 22 Homo sapiens pi4K230; FLJ1   | 0.00327813 | 0.02014597 | 1.14876802 |
| C3orf10   | NM_018462.4 C3ORF10   | 3 Homo sapiens MDS027; HSP      | 0.00035849 | 0.00476644 | 1.14849805 |
| WDR54     | NM_032118.2 WDR54     | 2 Homo sapiens FLJ12953         | 0.00024544 | 0.00376568 | 1.14842287 |
| LOC728499 | XM_928299.1 LOC728499 | 5 PREDICTED: Homo sapiens s     | 0.00518213 | 0.02734645 | 1.14783366 |
| C1orf115  | NM_024709.2 C1ORF115  | 1 Homo sapiens FLJ14146; RP:    | 0.00608804 | 0.03054621 | 1.14775125 |
| SYNJ2BP   | NM_018373.1 SYNJ2BP   | 14 Homo sapiens Arip2; OMP25;   | 0.00182296 | 0.01367581 | 1.14752729 |
| TST       | NM_003312.4 TST       | 22 Homo sapiens MGC19578; Rl    | 1.2373E-05 | 0.00053252 | 1.14741691 |
| SH2B3     | NM_005475.1 SH2B3     | 12 Homo sapiens LNK             | 0.0084383  | 0.03821597 | 1.14661614 |
| ZNF252    | NR_023392.1 ZNF252    | 8 Homo sapiens zinc finger pro  | 0.00880767 | 0.03943078 | 1.1466117  |
| CCDC23    | NM_199342.1 CCDC23    | 1 Homo sapiens coiled-coil don  | 8.6914E-05 | 0.00185827 | 1.14496963 |
| STUB1     | NM_005861.2 STUB1     | 16 Homo sapiens CHIP; SDCCAC    | 0.00037778 | 0.00495826 | 1.1443201  |
| EFR3A     | NM_015137.1 EFR3A     | 8 Homo sapiens KIAA0143; DK     | 0.00019049 | 0.00212911 | 1.14359131 |
| LOC644799 | XM_934554.1 LOC644799 | 20 PREDICTED: Homo sapiens h    | 0.0009921  | 0.00922254 | 1.14341666 |
| APPBP2    | NM_006380.2 APPBP2    | 17 Homo sapiens PAT1; KIAA02.   | 0.0063556  | 0.03151881 | 1.14310429 |
| LLGL1     | NM_004140.3 LLGL1     | 17 Homo sapiens HUGL; LLGL; I   | 0.00525481 | 0.02762006 | 1.14295318 |
| SMAP2     | NM_022733.1 SMAP2     | 1 Homo sapiens SMAP1; RP1-      | 0.00239888 | 0.01631586 | 1.14265877 |
| FOXO3     | NM_001455.2 FOXO3     | 14 Homo sapiens cDNA FLJ1287    | 0.00193901 | 0.01417733 | 1.14236926 |
| LOC399748 | XR_018212.1 LOC399748 | 6 Homo sapiens FOXO2; FKHRI     | 0.00396401 | 0.02283658 | 1.14236824 |
| C9orf5    | NM_032012.1 C9ORF5    | PREDICTED: Homo sapiens n       | 0.00012245 | 0.00232886 | 1.14183359 |
| LOC441763 | XM_930284.1 LOC441763 | 9 Homo sapiens CG2; FLJ3322.    | 0.00649924 | 0.03207519 | 1.14145819 |
| GGH       | NM_003878.1 GGH       | 16 PREDICTED: Homo sapiens h    | 0.00177187 | 0.0134524  | 1.14145732 |
| CYP24A1   | NM_000782.3 CYP24A1   | 8 Homo sapiens GH               | 0.00033888 | 0.00458387 | 1.14142308 |
| SLC9A3R1  | NM_004252.1 SLC9A3R1  | 20 Homo sapiens CYP24; P450-(   | 0.00210547 | 0.01505403 | 1.14126807 |
| FGFR1OP2  | NM_015633.1 FGFR1OP2  | 17 Homo sapiens NHERF1; NHEI    | 5.9983E-05 | 0.00145097 | 1.14107491 |
| LOC407835 | NR_002144.1 LOC407835 | 12 Homo sapiens DKFZp564O18     | 0.01153182 | 0.04703562 | 1.14059387 |
| GIPC1     | NM_202468.1 GIPC1     | 7 Homo sapiens mitogen-activa   | 0.00287097 | 0.0183587  | 1.14056857 |
| PRKCA     | NM_002737.2 PRKCA     | 19 Homo sapiens IIP-1; TIP-2; C | 0.00017704 | 0.0029896  | 1.14051102 |
| H1FX      | NM_006026.2 H1FX      | 17 Homo sapiens MGC129901; I    | 0.00566579 | 0.02902074 | 1.14027436 |
| TRAPPC5   | NM_00104246 TRAPPC5   | 3 Homo sapiens MGC8350; H1.     | 0.00685548 | 0.03313025 | 1.13973548 |
| SNX2      | NM_003100.2 SNX2      | 19 Homo sapiens MGC52424        | 0.00211021 | 0.01507979 | 1.13973533 |
| COL6A1    | NM_001848.1 COL6A1    | 5 Homo sapiens TRG-9; MGC5.     | 0.00064033 | 0.00685085 | 1.13970652 |
| PTGR1     | NM_012212.2 PTGR1     | 21 Homo sapiens OPLL            | 0.01006361 | 0.04314466 | 1.13934837 |
| DCTN3     | NM_024348.2 DCTN3     | 9 Homo sapiens MGC34943         | 0.00126831 | 0.01077737 | 1.13899926 |
| LRBA      | NM_006726.1 LRBA      | 9 Homo sapiens MGC111190; I     | 0.00425417 | 0.02393605 | 1.13882531 |
| TMEM189   | NM_199129.1 TMEM189   | 4 Homo sapiens BGL; CDC4L; I    | 0.00284513 | 0.01828167 | 1.13808596 |
| LOC644743 | XM_945181.1 LOC644743 | 20 Homo sapiens UBE2V1; Kua     | 0.00962709 | 0.0419792  | 1.13786447 |
| DUSP1     | NM_004417.2 DUSP1     | 1 PREDICTED: Homo sapiens h     | 6.2697E-06 | 0.0034774  | 1.13720405 |
| STS-1     | NM_032873.3 STS-1     | 5 Homo sapiens HVH1; MKP1;      | 0.00101586 | 0.00933216 | 1.13705636 |
| SURF1     | NM_003172.2 SURF1     | 11 Homo sapiens MGC15437; Ki    | 0.00139565 | 0.01142017 | 1.13610343 |
| LAMC1     | NM_002293.2 LAMC1     | 9 Homo sapiens surfeit 1 (SUR   | 0.00610512 | 0.03060873 | 1.13566395 |
| C5orf32   | NM_032412.2 C5ORF32   | 1 Homo sapiens LAMB2; MGC8      | 0.00011547 | 0.00224118 | 1.13563699 |
| PIP4K2A   | NM_005028.4 PIP4K2A   | 5 Homo sapiens ORF1-FL49        | 0.00497418 | 0.026481   | 1.13529172 |
| LOC728791 | XR_015547.2 LOC728791 | 10 Homo sapiens PIP5KII-alpha;  | 2.9556E-05 | 0.00091541 | 1.13511845 |
| KRT8      | NM_002273.2 KRT8      | PREDICTED: Homo sapiens n       | 0.00298751 | 0.01886729 | 1.13374453 |
| HLA-E     | NM_005516.4 HLA-E     | 12 Homo sapiens CYK8; KO; K8    | 0.0001484  | 0.002662   | 1.1335636  |
| C14orf159 | NM_024952.4 C14ORF159 | 6 Homo sapiens DKFZp686P19      | 0.00164989 | 0.01281252 | 1.13348158 |
| LAMP2     | NM_002294.1 LAMP2     | Homo sapiens FLJ39975; C14      | 0.00297706 | 0.0188552  | 1.13327666 |
| PICALM    | NM_007166.2 PICALM    | Homo sapiens CD107b; LAMF       | 0.00193217 | 0.01414296 | 1.13323755 |
| BMP4      | NM_001202.2 BMP4      | 11 Homo sapiens LAP; CALM; Cl   | 0.00287963 | 0.01839635 | 1.13306834 |
| FGFRL1    | NM_00100435 FGFRL1    | 14 Homo sapiens BMP2B1; BMP4    | 0.00371155 | 0.02189597 | 1.13302617 |
| FLOT1     | NM_005803.2 FLOT1     | 4 Homo sapiens FGFR5; FHFR      | 0.00888922 | 0.03966192 | 1.1327923  |
| CLIC4     | XM_938776.1 CLIC4     | 6 Homo sapiens flotillin 1 (FLO | 0.00324248 | 0.0199732  | 1.13278938 |
| LOC441876 | XM_946278.1 LOC441876 | 1 Homo sapiens p64H1; CLIC4     | 0.01016094 | 0.04342147 | 1.13195294 |
| TOB1      | NM_005749.2 TOB1      | PREDICTED: Homo sapiens s       | 0.00485129 | 0.02605703 | 1.13179233 |
| HYOU1     | NM_006389.2 HYOU1     | 17 Homo sapiens MGC104792; ^    | 0.0100018  | 0.04303275 | 1.1313057  |
| RHBDD2    | NM_00104045 RHBDD2    | 11 Homo sapiens DKFZp686N08     | 0.0057444  | 0.02925383 | 1.13044603 |
| FBXO21    | NM_033624.2 FBXO21    | 7 Homo sapiens NPD007; RHBI     | 0.00013524 | 0.00251437 | 1.12994553 |
| RFX5      | NM_000449.3 RFX5      | 12 Homo sapiens FBX21; MGC21    | 0.0109372  | 0.04534987 | 1.12987105 |
| MSRB2     | NM_012228.2 MSRB2     | 1 Homo sapiens regulatory fact  | 0.00260335 | 0.01728095 | 1.129136   |
| WDFY1     | NM_020830.3 WDFY1     | 10 Homo sapiens CBS-1; PILB; I  | 0.00335502 | 0.02047615 | 1.12911614 |
| GTF2B     | NM_001514.3 GTF2B     | 2 Homo sapiens FENS-1; ZFYV     | 0.00033162 | 0.004518   | 1.12906971 |
| FNDC3B    | NM_00113509 FNDC3B    | 1 Homo sapiens TFIB; TF2B       | 0.00519023 | 0.02735654 | 1.12870198 |
| LOC643272 | XM_926633.1 LOC643272 | 3 Homo sapiens fibronectin typ  | 0.00588136 | 0.02968898 | 1.12830578 |
| TJP3      | NM_014428.1 TJP3      | 3 PREDICTED: Homo sapiens h     | 0.00830867 | 0.03780971 | 1.12740981 |
| LUZP1     | NM_033631.2 LUZP1     | 19 Homo sapiens ZO-3; MGC111    | 0.00999059 | 0.04304039 | 1.12717802 |
|           |                       | 1 Homo sapiens KIAA0601; LU     | 0.00090319 | 0.00863203 | 1.12690323 |

### 0.5 ACL-Dependent Upreg

|           |             |           |    |                              |            |            |            |
|-----------|-------------|-----------|----|------------------------------|------------|------------|------------|
| FAM120B   | NM_032448.1 | FAM120B   | 6  | Homo sapiens KIAA1838; dJ    | 0.00020946 | 0.00334121 | 1.12680949 |
| DHX40     | XM_942276.1 | DHX40     |    | PREDICTED: Homo sapiens C    | 0.00586027 | 0.02963897 | 1.12665428 |
| ATP6V0A1  | NM_005177.2 | ATP6V0A1  | 17 | Homo sapiens ATP6N1; VPP1    | 8.7905E-05 | 0.00186741 | 1.12453018 |
| RRAGD     | NM_021244.2 | RRAGD     | 6  | Homo sapiens RAGD; DKFZP     | 0.00939739 | 0.04113994 | 1.12413891 |
| ENO2      | NM_001975.2 | ENO2      | 12 | Homo sapiens NSE             | 0.00055144 | 0.00625313 | 1.12395527 |
| RNF20     | NM_019592.5 | RNF20     | 9  | Homo sapiens BRE1A; MGC1     | 0.00181865 | 0.01366666 | 1.12377002 |
| C4orf14   | NM_032313.2 | C4ORF14   | 4  | Homo sapiens mAtNOS1; hA     | 0.0001488  | 0.00266544 | 1.12363742 |
| DYNC1H1   | NM_001376.2 | DYNC1H1   | 14 | Homo sapiens DNECL; DNCH     | 0.00014933 | 0.00267136 | 1.12348485 |
| ZMIZ1     | NM_020338.2 | ZMIZ1     | 10 | Homo sapiens MIZ; Zimp10;    | 0.00169811 | 0.01305695 | 1.12341114 |
| WWC1      | NM_015238.1 | WWC1      | 5  | Homo sapiens FLJ10865; KIA   | 0.01123919 | 0.04616879 | 1.12296189 |
| HSD17B4   | NM_000414.1 | HSD17B4   | 5  | Homo sapiens MFE-2           | 0.00157052 | 0.01242177 | 1.12278356 |
| KIFC2     | NM_145754.2 | KIFC2     | 8  | Homo sapiens kinesin family  | 0.00063268 | 0.00680197 | 1.1226465  |
| LMTK3     | XM_936372.1 | LMTK3     |    | PREDICTED: Homo sapiens k    | 2.8891E-05 | 0.00090754 | 1.12242274 |
| LZTR1     | NM_006767.2 | LZTR1     | 22 | Homo sapiens MGC21205; T     | 0.00100421 | 0.00927002 | 1.12118593 |
| LOC729279 | XR_039753.1 | LOC729279 |    | PREDICTED: Homo sapiens n    | 0.00030637 | 0.0043159  | 1.12045779 |
| PPP1R2    | NM_006241.3 | PPP1R2    | 3  | Homo sapiens MGC87148; IF    | 0.00280442 | 0.00680139 | 1.12020045 |
| TMEM99    | Hs.562720   | TMEM99    | 17 | Homo sapiens MGC21518        | 0.00647245 | 0.03199061 | 1.11988588 |
| C9orf46   | NM_018465.1 | C9ORF46   | 9  | Homo sapiens FLJ39176; FLJ   | 0.01179919 | 0.0478026  | 1.11971413 |
| ASAP1     | NM_018482.2 | ASAP1     | 8  | Homo sapiens ZG14P; AMAP:    | 0.00289335 | 0.01845727 | 1.11966461 |
| LOC643336 | XM_00171856 | LOC643336 |    | PREDICTED: Homo sapiens s    | 0.00535891 | 0.02800069 | 1.11946779 |
| PRRC1     | NM_130809.2 | PRRC1     | 5  | Homo sapiens FLJ32875        | 0.01198511 | 0.04827546 | 1.11876806 |
| CLDN12    | NM_012129.2 | CLDN12    | 7  | Homo sapiens claudin 12 (CL  | 0.009092   | 0.04025502 | 1.11867298 |
| DAG1      | NM_004393.1 | DAG1      | 3  | Homo sapiens AGRNR; 156D.    | 0.00655405 | 0.03226159 | 1.1184523  |
| ITGA3     | NM_002204.1 | ITGA3     | 17 | Homo sapiens GAN-B3; FLJ3:   | 0.00373812 | 0.02195507 | 1.11818209 |
| CENPE     | NM_001813.2 | CENPE     | 4  | Homo sapiens KIF10           | 0.00939871 | 0.04113215 | 1.11681622 |
| GMPPA     | NM_013335.2 | GMPPA     | 2  | Homo sapiens GDP-mannose     | 0.00757118 | 0.03556468 | 1.11668474 |
| AGPAT2    | NM_00101272 | AGPAT2    | 9  | Homo sapiens LPAAB; LPAAT:   | 0.00838209 | 0.03803935 | 1.11625354 |
| TMEM118   | NM_032814.1 | TMEM118   |    | Homo sapiens FLJ14627        | 0.00340674 | 0.02073452 | 1.115284   |
| RAB11FIP5 | NM_015470.1 | RAB11FIP5 | 2  | Homo sapiens RIP11; pp75;    | 0.01041629 | 0.04404413 | 1.11465013 |
| CALR      | NM_004343.2 | CALR      | 19 | Homo sapiens FLJ26680; cC1   | 0.00103099 | 0.00941244 | 1.11445352 |
| PJA2      | NM_014819.2 | PJA2      |    | Homo sapiens KIAA0438; RN    | 0.0008144  | 0.00806854 | 1.11440346 |
| CARHSP1   | NM_014316.1 | CARHSP1   | 16 | Homo sapiens CSDC1; MGC1     | 0.00451898 | 0.02485624 | 1.11427171 |
| C2orf44   | NM_025203.1 | C2ORF44   | 2  | Homo sapiens FLJ21945; PP:   | 0.00738307 | 0.03497852 | 1.11426863 |
| SBF1      | NM_002972.1 | SBF1      | 22 | Homo sapiens DKFZp761D04     | 0.00424821 | 0.02393295 | 1.11347162 |
| ATP6V0E2  | NM_145230.1 | ATP6V0E2  | 7  | Homo sapiens ATP6V0E2L; C    | 0.00040822 | 0.00517343 | 1.11275405 |
| MFSD3     | NM_138431.1 | MFSD3     | 8  | Homo sapiens major facilitat | 0.00072333 | 0.00743866 | 1.11145889 |
| CAMLG     | NM_001745.2 | CAMLG     | 5  | Homo sapiens CAML; MGC16     | 0.00070612 | 0.00731844 | 1.11125347 |
| UNC84B    | NM_015374.1 | UNC84B    | 22 | Homo sapiens KIAA0668; MG    | 0.00057982 | 0.00644804 | 1.11120824 |
| SPPL2A    | NM_032802.2 | SPPL2A    | 15 | Homo sapiens PSL2; IMP3      | 0.00439456 | 0.02449717 | 1.11104667 |
| UBE4A     | NM_004788.2 | UBE4A     | 11 | Homo sapiens UFD2; KIAA01    | 0.00418018 | 0.02363004 | 1.11062454 |
| TWF2      | NM_007284.3 | TWF2      | 3  | Homo sapiens MSTP011; A6F    | 0.00758996 | 0.03561505 | 1.11011032 |
| PERP      | NM_022121.2 | PERP      | 6  | Homo sapiens THW; RP3-49     | 0.00066351 | 0.00701958 | 1.11000763 |
| IQGAP1    | NM_003870.3 | IQGAP1    | 15 | Homo sapiens HUMORFA01;      | 0.01252597 | 0.04966924 | 1.10988334 |
| HMGB3     | NM_005342.2 | HMGB3     |    | Homo sapiens MGC90319; H     | 0.01042075 | 0.0440349  | 1.10931851 |
| TSPYL1    | NM_003309.1 | TSPYL1    | 6  | Homo sapiens TSPYL           | 0.00174916 | 0.01334111 | 1.10867881 |
| C19orf22  | NM_138774.2 | C19ORF22  | 19 | Homo sapiens MGC16353        | 0.00296741 | 0.01882102 | 1.10741647 |
| CAPZA2    | NM_006136.2 | CAPZA2    | 7  | Homo sapiens CAPZ; CAPP2     | 0.00045722 | 0.00555534 | 1.10741517 |
|           | Hs.57079    | HS.57079  | 10 | Homo sapiens cDNA FLJ1326    | 0.00211625 | 0.01508226 | 1.10720316 |
| RRAGA     | NM_006570.4 | RRAGA     | 9  | Homo sapiens RAGA; FIP-1     | 0.00049091 | 0.00581032 | 1.10577836 |
| UBE1      | NM_153280.1 | UBE1      |    | Homo sapiens UBA1A; A1S9;    | 0.00234681 | 0.01610211 | 1.10565893 |
| ATP1B3    | NM_001679.2 | ATP1B3    |    | PREDICTED: Homo sapiens A    | 0.00028585 | 0.00411427 | 1.105292   |
| TMEM41B   | NM_015012.1 | TMEM41B   | 11 | Homo sapiens MGC33897; K     | 0.00070626 | 0.00731418 | 1.10517367 |
| FKBP1A    | NM_000801.2 | FKBP1A    | 20 | Homo sapiens PKCII2; FKBP1   | 0.00449063 | 0.02477228 | 1.10491917 |
| MYH10     | NM_005964.1 | MYH10     | 17 | Homo sapiens NFMHCB; MG      | 0.00052362 | 0.00605154 | 1.10471166 |
| LOC646195 | XM_929151.1 | LOC646195 | 11 | PREDICTED: Homo sapiens s    | 0.00818819 | 0.03744143 | 1.10463414 |
| CMAS      | NM_018686.3 | CMAS      | 12 | Homo sapiens cytidine mono   | 0.00158854 | 0.01251198 | 1.10437964 |
| IFNGR1    | NM_000416.1 | IFNGR1    | 6  | Homo sapiens CD119; IFNGR    | 0.00581985 | 0.02953595 | 1.10415379 |
| LDLR      | NM_000527.2 | LDLR      | 19 | Homo sapiens FHC; FH         | 9.6176E-05 | 0.00198894 | 1.10388277 |
| TMED3     | NM_007364.2 | TMED3     | 15 | Homo sapiens MGC133022; C    | 0.00027068 | 0.00400008 | 1.10379108 |
| TPP1      | NM_000391.2 | TPP1      | 11 | Homo sapiens MGC21297; L     | 0.0068525  | 0.03312793 | 1.10342799 |
| SAPS3     | NM_018312.3 | SAPS3     | 11 | Homo sapiens MGC125712; :    | 0.00133289 | 0.01109847 | 1.10326444 |
| KITLG     | NM_000899.3 | KITLG     | 12 | Homo sapiens DKFZp686F22     | 0.00320171 | 0.0198512  | 1.10319889 |
| NUMB      | NM_003744.5 | NUMB      | 14 | Homo sapiens S171            | 0.00371203 | 0.02188911 | 1.10289362 |
| DHCR24    | NM_014762.2 | DHCR24    | 1  | Homo sapiens Nbla03646; se   | 0.00294197 | 0.01869545 | 1.10282959 |
| RHOC      | NM_175744.3 | RHOC      | 1  | Homo sapiens H9; ARHC; MG    | 3.5452E-05 | 0.00103972 | 1.10228598 |
| ATPGAP2   | NM_005765.2 | ATPGAP2   |    | Homo sapiens ELDLF10; APT    | 0.00015109 | 0.00268118 | 1.10201313 |
| UBR4      | NM_020765.1 | UBR4      | 1  | Homo sapiens KIAA1307; FL    | 0.00193534 | 0.01415832 | 1.10175705 |
| MLEC      | NM_014730.2 | MLEC      | 12 | Homo sapiens malectin (MLE   | 0.00051272 | 0.00595671 | 1.10133393 |
| HMG20B    | NM_006339.1 | HMG20B    | 19 | Homo sapiens SMARCE1r; FL    | 0.00048165 | 0.00576236 | 1.10112698 |
| SAMM50    | NM_015380.3 | SAMM50    | 22 | Homo sapiens OMP85; TOB5     | 0.00171261 | 0.01315318 | 1.10087658 |



### 0.5 ACL-Dependent Upreg

|             |             |             |    |              |                           |              |            |            |
|-------------|-------------|-------------|----|--------------|---------------------------|--------------|------------|------------|
| GMFB        | NM_004124.2 | GMFB        | 14 | Homo sapiens | GMF                       | 0.00409942   | 0.02333271 | 1.09952115 |
| ARL8B       | NM_018184.2 | ARL8B       | 3  | Homo sapiens | FLJ10702; ARL8B           | 0.00280208   | 0.0180927  | 1.09918318 |
| CHMP2A      | NM_198426.1 | CHMP2A      | 19 | Homo sapiens | VPS2; VPS2A;              | 0.01250104   | 0.04962975 | 1.0991335  |
| TRAPPC1     | NM_021210.2 | TRAPPC1     | 17 | Homo sapiens | BET5; MUM2                | 0.01212451   | 0.04858601 | 1.098739   |
| SLC44A1     | NM_080546.2 | SLC44A1     | 9  | Homo sapiens | RP11-287A8.1              | 0.00323815   | 0.01995578 | 1.09871763 |
| MAN2B2      | NM_015274.1 | MAN2B2      | 4  | Homo sapiens | KIAA0935                  | 0.00875923   | 0.03925366 | 1.0984937  |
| CLTA        | NM_007096.1 | CLTA        | 9  | Homo sapiens | LCA                       | 0.00251973   | 0.01688651 | 1.09846236 |
| FNBP1       | NM_015033.2 | FNBP1       | 9  | Homo sapiens | PBP17; MGC110001          | 0.0075997    | 0.0356355  | 1.0982142  |
| LOC730432   | XM_936257.1 | LOC730432   |    |              | PREDICTED: Homo sapiens s | 0.00564338   | 0.02897315 | 1.09768492 |
| ACTN4       | NM_004924.3 | ACTN4       | 19 | Homo sapiens | DKFZp686K23               | 0.00154018   | 0.01224021 | 1.09761512 |
| FOS         | NM_005252.2 | FOS         | 14 | Homo sapiens | c-fos                     | 0.00045728   | 0.00555105 | 1.09728802 |
| SLC1A5      | NM_005628.1 | SLC1A5      | 19 | Homo sapiens | M7V1; ATBO;               | 0.01063005   | 0.04457829 | 1.09710566 |
| CRIPT       | NM_014171.3 | CRIPT       | 2  | Homo sapiens | HSPC139                   | 0.00967061   | 0.04209973 | 1.09687317 |
| FAM122B     | NM_145284.3 | FAM122B     |    |              | Homo sapiens              | MGC131814; I | 0.00884392 | 0.03952629 |
| RNF149      | NM_173647.2 | RNF149      | 2  | Homo sapiens | FLJ90504; DN              | 0.0030263    | 0.01901262 | 1.09673392 |
| SH3GLB2     | NM_020145.2 | SH3GLB2     | 9  | Homo sapiens | PP9455; PP65              | 0.00073034   | 0.00748749 | 1.09568295 |
| PTMS        | NM_002824.4 | PTMS        | 12 | Homo sapiens | parathyrosin              | 0.00795148   | 0.03676484 | 1.09558173 |
| GNAI2       | NM_002070.2 | GNAI2       | 3  | Homo sapiens | H_LUCA16.1;               | 0.00663377   | 0.03247315 | 1.09539966 |
| UBL5        | NM_00104824 | UBL5        | 19 | Homo sapiens | HUB1; MGC130001           | 0.00092535   | 0.00876798 | 1.09531366 |
| NCAPD2      | NM_014865.2 | NCAPD2      | 12 | Homo sapiens | hCAP-D2; KIAA0001         | 0.0024729    | 0.01668232 | 1.09523894 |
| LOC10013178 | XR_039693.1 | LOC10013178 | 1  |              | PREDICTED: Homo sapiens n | 0.0080276    | 0.03697494 | 1.09510669 |
| MT1E        | NM_175617.2 | MT1E        | 16 | Homo sapiens | MT1; MTD                  | 0.00317936   | 0.01975882 | 1.09472336 |
| AMD1        | NM_00103305 | AMD1        | 6  | Homo sapiens | ADOMETDC; A               | 0.00430256   | 0.02414677 | 1.09461241 |
| RAC2        | NM_002872.3 | RAC2        | 22 | Homo sapiens | Gx; EN-7; HSF1            | 0.00023463   | 0.00362078 | 1.09446717 |
| HIBADH      | NM_152740.2 | HIBADH      | 7  | Homo sapiens | MGC40361; N               | 0.00165364   | 0.01283413 | 1.09401988 |
| CDH3        | NM_001793.3 | CDH3        | 16 | Homo sapiens | HJMD; PCAD;               | 0.0051662    | 0.02728411 | 1.09391014 |
| SCARB2      | NM_005506.2 | SCARB2      | 4  | Homo sapiens | CD36L2; HLG               | 0.00101535   | 0.00933392 | 1.09362341 |
| ATP6V1B2    | NM_001693.2 | ATP6V1B2    | 8  | Homo sapiens | VATB; VPP3; A             | 0.00041661   | 0.00524457 | 1.093417   |
| PAIP2       | NM_00103311 | PAIP2       | 5  | Homo sapiens | PAIP2A; MGC70001          | 0.0026269    | 0.01734171 | 1.09306752 |
| GLG1        | NM_012201.4 | GLG1        | 16 | Homo sapiens | CFR-1; FLJ233             | 0.00011702   | 0.00224488 | 1.09305111 |
| PAPSS1      | NM_005443.4 | PAPSS1      | 4  | Homo sapiens | SK1; PAPSS; I             | 0.00415091   | 0.02357517 | 1.09266126 |
| BSG         | NM_001728.2 | BSG         | 19 | Homo sapiens | EMMPRIN; OK               | 0.0012684    | 0.01077123 | 1.09233689 |
| LOC10013254 | XR_039468.1 | LOC10013254 | 12 |              | PREDICTED: Homo sapiens n | 0.01210901   | 0.04855323 | 1.09197684 |
| MTRF1L      | NM_019041.3 | MTRF1L      | 6  | Homo sapiens | MGC102748                 | 0.00921968   | 0.04067092 | 1.09183931 |
| ZNHIT1      | NM_006349.2 | ZNHIT1      | 7  | Homo sapiens | ZNFN4A1; CG               | 0.00210278   | 0.01504288 | 1.09129972 |
| CYB5R3      | NM_007326.2 | CYB5R3      | 22 | Homo sapiens | DIA1; B5R                 | 0.00047959   | 0.00575857 | 1.09047885 |
| PEPD        | NM_000285.1 | PEPD        | 19 | Homo sapiens | PROLIDASE; M              | 0.00388004   | 0.02499948 | 1.0894296  |
| LTA4H       | NM_000895.1 | LTA4H       | 12 | Homo sapiens | leukotriene A4            | 0.00130545   | 0.0109734  | 1.08931295 |
| DPY19L1     | XM_938743.1 | DPY19L1     | 7  | Homo sapiens | KIAA0877                  | 0.00135402   | 0.01117616 | 1.0889889  |
| LOC442727   | XR_017503.2 | LOC442727   | 7  |              | PREDICTED: Homo sapiens n | 0.00391106   | 0.02265953 | 1.0886016  |
| HLA-A       | NM_002116.5 | HLA-A       | 6  | Homo sapiens | major histocor            | 3.8166E-05   | 0.00109746 | 1.08858661 |
| EML3        | NM_153265.1 | EML3        | 11 | Homo sapiens | MGC111422; I              | 0.00682403   | 0.03305055 | 1.08809452 |
| FAM46A      | NM_017633.1 | FAM46A      | 6  | Homo sapiens | XTP11; C6orf3             | 0.0061243    | 0.03067007 | 1.08786644 |
| GNS         | NM_002076.2 | GNS         | 12 | Homo sapiens | G6S; MGC212               | 0.0012277    | 0.01058155 | 1.08767701 |
| TMEM69      | NM_016486.3 | TMEM69      | 1  | Homo sapiens | C1orf154; MG              | 0.01085785   | 0.04513379 | 1.08719663 |
| TJP1        | NM_003257.2 | TJP1        | 15 | Homo sapiens | MGC133289; I              | 0.01245718   | 0.04950012 | 1.08649305 |
| RPL13L      | NR_002803.1 | RPL13L      | 12 | Homo sapiens | RRPL13L                   | 0.00658658   | 0.03234965 | 1.08644017 |
| CLPTM1      | NM_001294.1 | CLPTM1      | 19 | Homo sapiens | cleft lip and p           | 0.00381025   | 0.02223095 | 1.08607699 |
| FAM83D      | NM_030919.1 | FAM83D      | 20 | Homo sapiens | C20orf129; FL             | 0.01066555   | 0.04464242 | 1.08598503 |
| FAM50A      | NM_004699.1 | FAM50A      |    |              | Homo sapiens              | DDX9928E; 9F | 0.00168967 | 0.01302983 |
| PRAGMIN     | NM_00108082 | PRAGMIN     | 8  | Homo sapiens | DKFZp761P04               | 0.01104855   | 0.04569722 | 1.08557578 |
| PITPNM1     | NM_004910.1 | PITPNM1     | 11 | Homo sapiens | NIR2; PITPNM              | 0.01119522   | 0.04608814 | 1.08545878 |
| LANCL1      | NM_006055.1 | LANCL1      | 2  | Homo sapiens | p40; GPR69A               | 0.00385407   | 0.02238803 | 1.08497261 |
| BSCL2       | NM_032667.4 | BSCL2       | 11 | Homo sapiens | SPG17; MGC4               | 0.01087056   | 0.04515832 | 1.08490551 |
| H1FO        | NM_005318.2 | H1FO        | 22 | Homo sapiens | H1FV; MGC52               | 0.00059482   | 0.00656533 | 1.08460008 |
| PRCP        | NM_005040.2 | PRCP        | 11 | Homo sapiens | HUMPCP; PCP;              | 0.00058727   | 0.00651448 | 1.08444498 |
| COX7A2L     | NM_004718.2 | COX7A2L     | 2  | Homo sapiens | EB1; COX7RP;              | 0.0003233    | 0.00445033 | 1.08432035 |
| ARL6IP1     | NM_015161.1 | ARL6IP1     | 16 | Homo sapiens | ARMER; AIP1;              | 0.00055317   | 0.00625667 | 1.08427262 |
| LOC730288   | XM_00112627 | LOC730288   | 7  |              | PREDICTED: Homo sapiens s | 0.00068211   | 0.00713654 | 1.08394037 |
| RNF114      | NM_018683.3 | RNF114      | 20 | Homo sapiens | RNF114                    | 0.00535425   | 0.02799842 | 1.0836821  |
| LCMT1       | NM_00103239 | LCMT1       | 16 | Homo sapiens | LCMT; PPMT1;              | 0.01006324   | 0.04315701 | 1.08349665 |
| TK1         | NM_003258.1 | TK1         |    |              | Homo sapiens              | TK2          | 0.00025506 | 0.00385085 |
| SLC25A23    | NM_024103.2 | SLC25A23    | 19 | Homo sapiens | MGC2615; MC               | 0.00155332   | 0.01232243 | 1.08285746 |
| CHSY1       | NM_014918.3 | CHSY1       | 15 | Homo sapiens | CSS1; KIAA09              | 0.00411326   | 0.02339138 | 1.082658   |
| NXN         | NM_022463.3 | NXN         | 17 | Homo sapiens | TRG-4; FLJ12              | 0.00682761   | 0.03304376 | 1.08242638 |
| TUBB3       | NM_006086.2 | TUBB3       | 16 | Homo sapiens | TUBB4; MC1R               | 0.00080733   | 0.00802248 | 1.08237778 |
| KIF20A      | NM_005733.1 | KIF20A      | 5  | Homo sapiens | RAB6KIFL; MK              | 0.00786242   | 0.03650587 | 1.08193004 |
| NCOA4       | NM_005437.1 | NCOA4       | 10 | Homo sapiens | RFG; ARA70; I             | 0.00157279   | 0.01243223 | 1.08160367 |
| MRPL2       | NM_015950.3 | MRPL2       | 6  | Homo sapiens | CGI-22; RPML              | 0.00460372   | 0.02516573 | 1.08134519 |
| ADD1        | NM_001119.3 | ADD1        | 4  | Homo sapiens | ADDA; MGC44               | 0.00994249   | 0.04291686 | 1.08127836 |

### 0.5 ACL-Dependent Upreg

|             |             |             |    |                         |                  |            |            |            |
|-------------|-------------|-------------|----|-------------------------|------------------|------------|------------|------------|
| C16orf58    | NM_022744.1 | C16ORF58    | 16 | Homo sapiens            | FLJ13868         | 0.01028145 | 0.04368298 | 1.08126663 |
| HDAC3       | NM_003883.2 | HDAC3       | 5  | Homo sapiens            | RPD3; HD3; R     | 0.00616308 | 0.03082936 | 1.08043731 |
| OAT         | NM_000274.1 | OAT         | 10 | Homo sapiens            | HOGA; DKFZp      | 0.00227058 | 0.01570917 | 1.08034471 |
| C20orf127   | NM_080757.1 | C20ORF127   | 20 | Homo sapiens            | dJ61404.6; M     | 0.01119108 | 0.04608543 | 1.08034107 |
| PSMD4       | NM_153822.1 | PSMD4       | 1  | Homo sapiens            | pUB-R5; Rpn1     | 0.00444282 | 0.02461095 | 1.08004249 |
| C7orf30     | NM_138446.1 | C7ORF30     | 7  | Homo sapiens            | chromosome 7     | 0.00134631 | 0.01113328 | 1.07962779 |
| ATP6V1D     | NM_015994.2 | ATP6V1D     | 14 | Homo sapiens            | ATP6M; VATD;     | 0.00547325 | 0.02846349 | 1.07924337 |
| C16orf57    | NM_024598.2 | C16ORF57    | 16 | Homo sapiens            | FLJ13154         | 0.01188885 | 0.04803372 | 1.07923321 |
| GLO1        | NM_006708.1 | GLO1        | 6  | Homo sapiens            | GLYI; GLOD1      | 0.00055579 | 0.00627026 | 1.0791003  |
| ID3         | NM_002167.2 | ID3         | 1  | Homo sapiens            | HEIR-1           | 0.00043765 | 0.00539669 | 1.07894192 |
| NCBP2       | NM_007362.3 | NCBP2       | 3  | Homo sapiens            | PIG55; CBP20     | 0.00417602 | 0.023657   | 1.07857842 |
| TOMM20      | NM_014765.2 | TOMM20      | 1  | Homo sapiens            | translocase of   | 0.0012432  | 0.01065965 | 1.07852172 |
| SEC11C      | NM_033280.1 | SEC11C      | 18 | Homo sapiens            | SPC21; SPCS4     | 0.00177457 | 0.01345748 | 1.0780719  |
| ATP6V1A     | NM_001690.2 | ATP6V1A     | 3  | Homo sapiens            | VA68; Vma1;      | 0.0065422  | 0.0322272  | 1.07805329 |
| TMEM160     | NM_017854.1 | TMEM160     | 19 | Homo sapiens            | FLJ20512         | 0.01074492 | 0.04487545 | 1.07792621 |
| PTTG1IP     | NM_004339.2 | PTTG1IP     | 21 | Homo sapiens            | CJ1orf3; C21c    | 0.01004928 | 0.04315297 | 1.07782718 |
| HSBP1       | NM_001537.2 | HSBP1       | 16 | Homo sapiens            | DKFZp686D16      | 0.00211226 | 0.01507002 | 1.07746652 |
| GYG1        | NM_004130.2 | GYG1        | 3  | Homo sapiens            | GYG              | 0.00910271 | 0.04028899 | 1.07674628 |
| WDR59       | NM_030581.3 | WDR59       | 16 | Homo sapiens            | FLJ12270; MG     | 0.01008791 | 0.04320688 | 1.07619244 |
| C20orf100   | NM_032883.1 | C20ORF100   | 20 | Homo sapiens            | dJ1108D11.2;     | 0.00291255 | 0.01853514 | 1.07581861 |
| BTG1        | NM_001731.1 | BTG1        | 12 | Homo sapiens            | B-cell transloc  | 0.00845475 | 0.03825125 | 1.07549505 |
| CEP55       | NM_018131.3 | CEP55       | 10 | Homo sapiens            | URCC6; C10or     | 0.00186623 | 0.01385926 | 1.07541245 |
| LOC642489   | XM_925989.1 | LOC642489   | 6  | PREDICTED: Homo sapiens | s                | 0.0034418  | 0.02086167 | 1.07455901 |
| RPS4Y1      | NM_001008.3 | RPS4Y1      | Y  | Homo sapiens            | RPS4Y; MGC1:     | 0.00323682 | 0.01995688 | 1.07375595 |
| AMZ2        | NM_016627.4 | AMZ2        | 17 | Homo sapiens            | archaealysin fai | 0.00670899 | 0.03268446 | 1.07346073 |
| LOC644511   | XM_934381.1 | LOC644511   |    | PREDICTED: Homo sapiens | s                | 0.00034848 | 0.00466616 | 1.0732759  |
| COMMD6      | NM_203497.1 | COMMD6      | 13 | Homo sapiens            | Acrg             | 0.00071496 | 0.00738122 | 1.07314444 |
| DCAF7       | NM_005828.2 | DCAF7       | 17 | Homo sapiens            | AN11; HAN11      | 0.01001233 | 0.04305009 | 1.07303496 |
| ADIPOR2     | NM_024551.2 | ADIPOR2     | 12 | Homo sapiens            | MGC4640; ACI     | 0.00415694 | 0.0235892  | 1.07223428 |
| LOC10013436 | XM_00171381 | LOC10013436 |    | PREDICTED: Homo sapiens | h                | 0.00277557 | 0.01800044 | 1.07140204 |
| RPS28       | NM_001031.4 | RPS28       | 19 | Homo sapiens            | ribosomal prot   | 8.6934E-05 | 0.00185572 | 1.07136112 |
| LOC646942   | XR_016892.2 | LOC646942   | 7  | PREDICTED: Homo sapiens | n                | 0.00863271 | 0.0389368  | 1.07095187 |
| CCND3       | NM_001760.2 | CCND3       | 6  | Homo sapiens            | cyclin D3 (CCN   | 0.00654196 | 0.03223798 | 1.07090367 |
| ATP1A1      | NM_000701.6 | ATP1A1      | 1  | Homo sapiens            | MGC3285; MG      | 0.00101873 | 0.00934552 | 1.07023271 |
| ASNSD1      | NM_019048.1 | ASNSD1      | 2  | Homo sapiens            | NBLA00058; N     | 0.00823207 | 0.0375643  | 1.06934119 |
| NUCB1       | NM_006184.3 | NUCB1       | 19 | Homo sapiens            | DKFZp686A15      | 0.00414406 | 0.02355649 | 1.06904679 |
| ANXA2P1     | NR_001562.1 | ANXA2P1     | 4  | Homo sapiens            | LP2A; ANXA2L     | 0.00158824 | 0.01251705 | 1.0683857  |
| MGST3       | NM_004528.2 | MGST3       | 1  | Homo sapiens            | GST-III          | 0.0013207  | 0.0110665  | 1.06774169 |
| WDR68       | NM_00100372 | WDR68       | 17 | Homo sapiens            | AN11; HAN11      | 0.01198214 | 0.04827821 | 1.06617623 |
| TUBB2C      | NM_006088.5 | TUBB2C      | 9  | Homo sapiens            | TUBB2            | 0.00190545 | 0.01406383 | 1.06569867 |
| LOC10000858 | NR_003286.1 | LOC10000858 |    | Homo sapiens            | 18S ribosomal    | 0.00159937 | 0.01258231 | 1.06544437 |
| LOC728453   | XM_00112730 | LOC728453   |    | PREDICTED: Homo sapiens | s                | 0.00391325 | 0.02266233 | 1.06468175 |
| GOT1        | NM_002079.1 | GOT1        | 10 | Homo sapiens            | GIG18            | 0.00344998 | 0.02087309 | 1.06464249 |
| LOC648390   | XR_037845.1 | LOC648390   | 2  | PREDICTED: Homo sapiens | n                | 0.01005404 | 0.04315945 | 1.06435611 |
| TMCO1       | NM_019026.2 | TMCO1       | 1  | Homo sapiens            | HP10122; TMC     | 0.00455087 | 0.02497985 | 1.06394072 |
| NRD1        | NM_002525.1 | NRD1        | 1  | Homo sapiens            | hNRD2; hNRD      | 0.00975887 | 0.04234485 | 1.06375439 |
| EEF2        | NM_001961.2 | EEF2        | 19 | Homo sapiens            | EF2; EEF-2       | 0.00181026 | 0.01363454 | 1.0637534  |
| COMMD3      | NM_012071.2 | COMMD3      | 10 | Homo sapiens            | C10orf8; DKFz    | 0.00532457 | 0.02787621 | 1.06350458 |
| SNHG9       | NR_003142.2 | SNHG9       | 16 | Homo sapiens            | DKFZp686N03      | 0.00553903 | 0.02868177 | 1.06280952 |
| CALM3       | NM_005184.2 | CALM3       | 19 | Homo sapiens            | PHKD; PHKD3      | 0.00085823 | 0.00837138 | 1.06280068 |
| TMBIM6      | NM_003217.1 | TMBIM6      | 12 | Homo sapiens            | BI-1; TMBIM6     | 0.00077618 | 0.00780659 | 1.06233769 |
| RNF181      | NM_016494.3 | RNF181      | 2  | Homo sapiens            | HSPC238          | 0.00803316 | 0.03698767 | 1.06181789 |
| CHP         | NM_007236.3 | CHP         | 15 | Homo sapiens            | SLC9A1BP         | 0.00816422 | 0.0373834  | 1.06071364 |
| MGEA5       | NM_012215.1 | MGEA5       | 10 | Homo sapiens            | MEA5; FLJ233     | 0.00743798 | 0.03515074 | 1.06015632 |
| AIF1L       | NM_031426.2 | AIF1L       | 9  | Homo sapiens            | MGC29466; FI     | 0.0059549  | 0.02998029 | 1.05991108 |
| TALDO1      | XM_938697.1 | TALDO1      |    | PREDICTED: Homo sapiens | ti               | 0.00534243 | 0.02795862 | 1.05914101 |
| ANXA2       | NM_00100285 | ANXA2       | 15 | Homo sapiens            | P36; LPC2D; A    | 0.00043213 | 0.00536859 | 1.05843253 |
| SERPINE2    | NM_006216.2 | SERPINE2    | 2  | Homo sapiens            | PI7; GDN; PNI    | 0.00130484 | 0.01097526 | 1.05800208 |
| NDUFA2      | NM_002488.3 | NDUFA2      | 5  | Homo sapiens            | B8; CD14         | 0.0067233  | 0.03270606 | 1.05733223 |
| RPL15       | NM_002948.2 | RPL15       | 3  | Homo sapiens            | RPL10; RPYL1     | 0.00361789 | 0.02163227 | 1.05627314 |
| VEZF1       | NM_007146.2 | VEZF1       | 17 | Homo sapiens            | DB1; ZNF161      | 0.01084917 | 0.04511186 | 1.05606812 |
| RING1       | NM_002931.3 | RING1       | 6  | Homo sapiens            | RNF1             | 0.00203768 | 0.01471215 | 1.0558552  |
| MAD2L2      | NM_006341.2 | MAD2L2      | 1  | Homo sapiens            | REV7; MAD2B      | 0.00625377 | 0.03114198 | 1.05554992 |
| LOC728820   | XR_038223.1 | LOC728820   |    | PREDICTED: Homo sapiens | n                | 0.01186089 | 0.04794998 | 1.05492577 |
| COX6A1      | NM_004373.2 | COX6A1      | 12 | Homo sapiens            | COX6AL; COX6     | 0.01240413 | 0.04939296 | 1.05484685 |
| C19orf53    | NM_014047.1 | C19ORF53    | 19 | Homo sapiens            | HSPC023          | 0.01115517 | 0.04599468 | 1.05416641 |
| LOC347544   | XM_293412.3 | LOC347544   |    | PREDICTED: Homo sapiens | s                | 0.00141312 | 0.01152047 | 1.05328736 |
| TMEM66      | NM_016127.4 | TMEM66      | 8  | Homo sapiens            | FLJ22274; FO     | 0.00952599 | 0.04156568 | 1.05265084 |
| UBA1        | NM_003334.3 | UBA1        | X  | Homo sapiens            | UBA1A; A1S9;     | 0.00820451 | 0.03747724 | 1.05198301 |
| LOC401115   | XM_937968.1 | LOC401115   |    | PREDICTED: Homo sapiens | h                | 0.00343871 | 0.02085249 | 1.05175894 |

### 0.5 ACL-Dependent Upreg

|             |             |              |    |                             |            |            |            |
|-------------|-------------|--------------|----|-----------------------------|------------|------------|------------|
| FAT1        | NM_005245.3 | FAT1         | 4  | Homo sapiens ME5; hFat1; C  | 0.00282126 | 0.01815468 | 1.05066676 |
| CCNI        | NM_006835.2 | CCNI         | 4  | Homo sapiens CYC1; CYI      | 0.00684944 | 0.03312519 | 1.05004233 |
| SNX3        | NM_152828.2 | SNX3         | 6  | Homo sapiens SDP3; MGC17    | 0.01134158 | 0.0464742  | 1.04627762 |
| LOC730740   | XM_930111.1 | LOC730740    |    | PREDICTED: Homo sapiens s   | 0.00898199 | 0.03994138 | 1.04573188 |
| RPL18A      | NM_000980.2 | RPL18A       | 19 | Homo sapiens ribosomal prot | 0.00885685 | 0.03957073 | 1.04334248 |
| PRDX1       | NM_181696.1 | PRDX1        | 1  | Homo sapiens MSP23; PAG; I  | 0.00950316 | 0.04147971 | 1.04330154 |
| AHCY        | NM_000687.1 | AHCY         | 20 | Homo sapiens SAHH           | 0.0068665  | 0.03315932 | 1.04076772 |
| LOC10013119 | XR_038314.1 | LOC100131196 |    | PREDICTED: Homo sapiens n   | 0.00524166 | 0.02756185 | 1.03824935 |

0.5 ACL-Indepen. Upreg

| SYMBOL    | SEARCH_KEY  | ILMN_GENE | CHROMOSOME | DEFINITION                | SYNONYMS        | pval       | fdr        | fold       |
|-----------|-------------|-----------|------------|---------------------------|-----------------|------------|------------|------------|
| LAMP3     | NM_014398.2 | LAMP3     | 3          | Homo sapiens              | TSC403; DC-L    | 1.4568E-06 | 0.00015573 | 23.3733885 |
| GFPT2     | NM_005110.1 | GFPT2     | 5          | Homo sapiens              | GFAT2; FLJ10    | 0.00027847 | 0.00405649 | 16.9158825 |
| SEMA3C    | NM_006379.2 | SEMA3C    | 7          | Homo sapiens              | SEMAE; SemE     | 0.00211921 | 0.01509523 | 16.8248458 |
| HEG1      | XM_087386.8 | HEG1      | 3          | Homo sapiens              | KIAA1237; MS    | 0.00029534 | 0.00421429 | 16.708763  |
| C14orf132 | NM_020215.2 | C14ORF132 | 14         | Homo sapiens              | DKFZp761F20     | 0.00105191 | 0.00954425 | 16.2543866 |
|           | Hs.505676   | HS.505676 | 12         | Homo sapiens              | cDNA FLJ3377    | 2.4012E-05 | 0.00081199 | 11.9294593 |
| C12orf26  | NM_032230.1 | C12ORF26  | 12         | Homo sapiens              | FLJ22789        | 5.2018E-06 | 0.00031343 | 10.945463  |
| CHD5      | NM_015557.1 | CHD5      | 1          | Homo sapiens              | KIAA0444; DK    | 2.8441E-06 | 0.00022177 | 8.65708243 |
| BAPX1     | NM_001189.2 | BAPX1     | 4          | Homo sapiens              | NKX3B; NKX3     | 0.00784639 | 0.03644419 | 8.05419368 |
| PCOLCE    | NM_002593.2 | PCOLCE    | 7          | Homo sapiens              | PCPE            | 0.00585067 | 0.02962431 | 6.94613458 |
| COL1A1    | NM_000088.2 | COL1A1    | 17         | Homo sapiens              | FLJ22789        | 2.8072E-06 | 0.00022019 | 6.56135856 |
| ESAM      | NM_138961.1 | ESAM      | 11         | Homo sapiens              | W117m           | 6.8631E-05 | 0.00157947 | 6.33484235 |
| CRISPLD2  | NM_031476.1 | CRISPLD2  | 16         | Homo sapiens              | DKFZP434B04     | 3.7686E-08 | 1.7842E-05 | 6.09368793 |
| OLFML2A   | NM_182487.1 | OLFML2A   | 9          | Homo sapiens              | PRO34319; G     | 9.9889E-06 | 0.00046461 | 5.52159465 |
| GSTT2B    | NM_00108084 | GSTT2B    | 22         | Homo sapiens              | MGC87963; G     | 0.00182276 | 0.01368205 | 5.11607274 |
| RAB6B     | NM_016577.2 | RAB6B     | 3          | Homo sapiens              | RAB6B, memb     | 0.00015333 | 0.00270281 | 5.10284712 |
| APLP1     | NM_005166.3 | APLP1     | 19         | Homo sapiens              | APLP            | 0.00010301 | 0.00207837 | 4.88731948 |
| SMAD6     | NM_005585.2 | SMAD6     | 15         | Homo sapiens              | MADH6; HsT1     | 0.00298035 | 0.01886698 | 4.79949983 |
| PLA2G10   | NM_003561.1 | PLA2G10   | 16         | Homo sapiens              | GXPLA2; SPLA    | 7.5841E-07 | 9.6668E-05 | 4.7002757  |
| GSTM1     | NM_000561.2 | GSTM1     | 1          | Homo sapiens              | MGC26563; G     | 1.0972E-05 | 0.00049473 | 4.2638243  |
| PCBP4     | NM_033009.1 | PCBP4     | 3          | Homo sapiens              | LIP4; MCG10     | 0.00469604 | 0.02548127 | 4.22274983 |
| LIMCH1    | NM_014988.1 | LIMCH1    | 4          | Homo sapiens              | DKFZp686B24     | 0.01199616 | 0.04830533 | 4.16225873 |
| MGC18216  | XM_927732.1 | MGC18216  | 15         | PREDICTED: Homo sapiens h |                 | 0.00010464 | 0.00210166 | 3.92568978 |
| HES2      | NM_019089.3 | HES2      | 1          | Homo sapiens              | hairly and enh  | 1.1902E-06 | 0.00013371 | 3.81183735 |
| PLEKHB1   | NM_021200.1 | PLEKHB1   | 11         | Homo sapiens              | PHR1; PHRET1    | 1.5636E-09 | 2.303E-06  | 3.75312168 |
| SUSD2     | NM_019601.3 | SUSD2     | 22         | Homo sapiens              | BK65A6.2; FL    | 5.8614E-09 | 4.3166E-06 | 3.73063356 |
| BEGAIN    | NM_020836.2 | BEGAIN    | 14         | Homo sapiens              | KIAA1446; BE    | 1.6365E-06 | 0.00016311 | 3.69813886 |
| SEMA6A    | NM_020796.2 | SEMA6A    | 5          | Homo sapiens              | VIA; SEMAQ; :   | 1.8812E-06 | 0.00017686 | 3.65814145 |
| HLA-DMB   | NM_002118.3 | HLA-DMB   | 6          | Homo sapiens              | D6S221E; RIN    | 5.6019E-08 | 2.1841E-05 | 3.63171055 |
| STAT4     | NM_003151.2 | STAT4     | 2          | Homo sapiens              | signal transdu  | 2.9516E-05 | 0.00091632 | 3.63071217 |
| FLJ35767  | NM_207459.1 | FLJ35767  | 17         | Homo sapiens              | FLJ35767 prot   | 6.5898E-11 | 1.7471E-07 | 3.55885075 |
| HPCAL4    | NM_016257.2 | HPCAL4    | 1          | Homo sapiens              | DKFZp761G12     | 3.605E-06  | 0.00025284 | 3.53464147 |
| CKMT1B    | NM_020990.3 | CKMT1B    | 15         | Homo sapiens              | UMTCK; CKMT     | 3.4198E-07 | 6.3849E-05 | 3.50244426 |
| SLC2A3    | NM_006931.1 | SLC2A3    | 12         | Homo sapiens              | GLUT3; FLJ90    | 9.974E-08  | 2.9381E-05 | 3.2854082  |
| HLA-DRA   | NM_019111.3 | HLA-DRA   | 6          | Homo sapiens              | HLA-DRA1        | 1.3138E-07 | 3.5542E-05 | 3.05174757 |
| ADAT2     | NM_182503.2 | ADAT2     | 6          | Homo sapiens              | TAD2; dJ20N2    | 0.00032746 | 0.0044797  | 3.02748053 |
| HIST1H2BD | NM_138720.1 | HIST1H2BD | 6          | Homo sapiens              | H2B.1B; HIRIF   | 1.4233E-08 | 8.9845E-06 | 2.98126712 |
| PRF1      | NM_005041.3 | PRF1      | 10         | Homo sapiens              | HPLH2; FLH2;    | 0.00017004 | 0.00291982 | 2.88171465 |
| GLDC      | NM_000170.1 | GLDC      | 9          | Homo sapiens              | MGC138198; C    | 3.4479E-07 | 6.348E-05  | 2.85265959 |
| LFNG      | NM_00104016 | LFNG      | 7          | Homo sapiens              | SCDO3           | 2.3777E-06 | 0.00019337 | 2.84135346 |
| RUNDC3B   | NM_138290.1 | RUNDC3B   | 7          | Homo sapiens              | RPIP9; RPIB9;   | 8.9566E-06 | 0.00043332 | 2.73175881 |
| OGDHL     | NM_018245.1 | OGDHL     | 10         | Homo sapiens              | oxoglutarate d  | 1.006E-06  | 0.00012124 | 2.70952873 |
| LMO2      | NM_005574.2 | LMO2      | 11         | Homo sapiens              | TTG2; RBTN2;    | 0.00109561 | 0.00978665 | 2.63290148 |
| ZMIZ2     | NM_031449.3 | ZMIZ2     | 7          | Homo sapiens              | DKFZp761I21     | 1.4396E-05 | 0.00058183 | 2.602221   |
| CD24      | NM_013230.2 | CD24      | Y          | Homo sapiens              | CD24A           | 2.319E-08  | 1.2296E-05 | 2.51891308 |
| CSPG4     | NM_001897.3 | CSPG4     | 15         | Homo sapiens              | MSK16; MCSP     | 0.00050403 | 0.00590233 | 2.43136035 |
| MICAL1    | NM_022765.2 | MICAL1    | 6          | Homo sapiens              | NICAL; DKFZp    | 9.8228E-05 | 0.00202192 | 2.42456045 |
| MTSS1     | NM_014751.2 | MTSS1     | 8          | Homo sapiens              | MIM; KIAA042    | 7.5983E-06 | 0.00038591 | 2.41357525 |
| PRPH      | NM_006262.3 | PRPH      | 12         | Homo sapiens              | PRPH1; NEF4     | 1.6494E-07 | 4.049E-05  | 2.39976554 |
| SUSD3     | NM_145006.2 | SUSD3     | 9          | Homo sapiens              | MGC26847        | 0.00100473 | 0.00926194 | 2.35230799 |
| TFAP2C    | NM_003222.3 | TFAP2C    | 20         | Homo sapiens              | AP2-GAMMA;      | 5.5822E-06 | 0.00032888 | 2.3332346  |
| ELOVL3    | NM_152310.1 | ELOVL3    | 10         | Homo sapiens              | CIG30; CIG-30   | 4.4474E-06 | 0.00028759 | 2.31249449 |
| TLE6      | NM_024760.1 | TLE6      | 19         | Homo sapiens              | FLJ14009; MG    | 8.3545E-06 | 0.00041017 | 2.30142028 |
| CHURC1    | NM_145165.2 | CHURC1    | 14         | Homo sapiens              | FLJ33064; chc   | 1.4523E-06 | 0.00015652 | 2.28246924 |
| CRLF1     | NM_004750.2 | CRLF1     | 19         | Homo sapiens              | CISS; CISS1;    | 4.2453E-06 | 0.00028138 | 2.25988613 |
| LOC644761 | XR_019390.1 | LOC644761 |            | PREDICTED: Homo sapiens n |                 | 0.0018315  | 0.01369338 | 2.25375651 |
| CTGF      | NM_001901.2 | CTGF      | 6          | Homo sapiens              | CNN2; MGC10     | 6.8104E-08 | 2.5077E-05 | 2.24031906 |
| LOC652097 | XM_941428.1 | LOC652097 |            | PREDICTED: Homo sapiens h |                 | 1.2313E-07 | 3.4004E-05 | 2.2375519  |
| TCTA      | NM_022171.1 | TCTA      | 3          | Homo sapiens              | T-cell leukemia | 0.00053854 | 0.00617548 | 2.23021612 |
| ZMAT5     | NM_019103.2 | ZMAT5     | 22         | Homo sapiens              | zinc finger, ma | 0.00030247 | 0.00427463 | 2.19836006 |
| FZD4      | NM_012193.2 | FZD4      | 11         | Homo sapiens              | FZE4; EVR1; C   | 3.1987E-06 | 0.00024092 | 2.16725033 |
| PTH2      | NM_178449.2 | PTH2      | 19         | Homo sapiens              | parathyroid hc  | 0.00311754 | 0.01943844 | 2.12505549 |
| TMEM2     | NM_013390.1 | TMEM2     | 9          | Homo sapiens              | transmembrar    | 7.2087E-05 | 0.0016169  | 2.10117648 |
| ARID5B    | NM_032199.1 | ARID5B    | 10         | Homo sapiens              | MRF2; FLJ211    | 4.7211E-08 | 1.9557E-05 | 2.08649165 |
| SGK       | NM_005627.2 | SGK       | 6          | Homo sapiens              | SGK1            | 5.0235E-07 | 7.6541E-05 | 2.0834313  |
| FAM43A    | NM_153690.4 | FAM43A    | 3          | Homo sapiens              | FLJ90022        | 7.0461E-05 | 0.00160763 | 2.06414609 |
| LOC339352 | XR_019601.2 | LOC339352 |            | PREDICTED: Homo sapiens n |                 | 0.00143217 | 0.01164718 | 2.06368276 |
| SCARNA11  | NR_003012.1 | SCARNA11  | 12         | Homo sapiens              | ACA57           | 7.6392E-07 | 9.6443E-05 | 2.05457857 |
| AMOT      | NM_133265.2 | AMOT      | X          | Homo sapiens              | KIAA1071        | 6.8259E-05 | 0.00157638 | 2.03529839 |

0.5 ACL-Indepen. Upreg

|           |             |             |       |                             |                          |            |            |           |
|-----------|-------------|-------------|-------|-----------------------------|--------------------------|------------|------------|-----------|
| KCNS3     | NM_002252.3 | KCNS3       | 2     | Homo sapiens MGC9481; KV/   | 6.8939E-05               | 0.00158381 | 2.02579884 |           |
| LOC648526 | XM_937579.1 | LOC648526   |       | PREDICTED: Homo sapiens s   | 6.2139E-07               | 8.4919E-05 | 1.99996925 |           |
| MPP1      | NM_002436.2 | MPP1        | X     | Homo sapiens AAG12; EMP5!   | 4.0772E-05               | 0.00115239 | 1.99017947 |           |
| CLDN23    | NM_194284.1 | CLDN23      | 8     | Homo sapiens CLDNL; hCG1f   | 0.00124068               | 0.01065187 | 1.97487401 |           |
| GSTT2     | NM_00108084 | GSTT2       |       | Homo sapiens glutathione S- | 0.00022832               | 0.00354407 | 1.97228489 |           |
| RBM20     | XM_291671.6 | RBM20       |       | PREDICTED: Homo sapiens R   | 0.00290571               | 0.01851832 | 1.95912186 |           |
| SH3BGR2   | NM_031469.1 | SH3BGR2     | 6     | Homo sapiens FLJ90025       | 2.1472E-05               | 0.000757   | 1.95162634 |           |
| NES       | NM_006617.1 | NES         | 1     | Homo sapiens FLJ21841; Nbl  | 1.6931E-05               | 0.00065433 | 1.94620091 |           |
| PDK3      | NM_005391.1 | PDK3        | X     | Homo sapiens pyruvate dehy  | 0.00416139               | 0.02360433 | 1.93795619 |           |
| NRGN      | NM_006176.1 | NRGN        | 11    | Homo sapiens RC3; hng       | 2.8679E-07               | 5.9402E-05 | 1.90452433 |           |
| SCNN1D    | NM_002978.2 | SCNN1D      | 1     | Homo sapiens SCND; ENaC     | 0.00124453               | 0.01065731 | 1.89787045 |           |
| SGK1      | NM_005627.3 | SGK1        | 6     | Homo sapiens SGK            | 8.6534E-06               | 0.00042328 | 1.89739388 |           |
| FOXD4L1   | NM_012184.3 | FOXD4L1     | 2     | Homo sapiens bA395L14.1     | 0.00414909               | 0.02357496 | 1.88736539 |           |
| CRIP2     | NM_001312.2 | CRIP2       | 14    | Homo sapiens CRP2; CRIP; E  | 4.4589E-07               | 7.0366E-05 | 1.87948424 |           |
| CAPN5     | NM_004055.3 | CAPN5       | 11    | Homo sapiens HTRA3; FLJ46   | 0.00010587               | 0.00211671 | 1.87837241 |           |
| LOC388588 | XM_946205.1 | LOC388588   | 1     | PREDICTED: Homo sapiens h   | 0.00017583               | 0.00298431 | 1.87633023 |           |
| IRX3      | NM_024336.1 | IRX3        | 16    | Homo sapiens IRX-1          | 1.0434E-05               | 0.00047367 | 1.86908103 |           |
| SYN2      | NM_003178.3 | SYN2        | 3     | Homo sapiens SYNIIa; SYNII  | 0.00020891               | 0.00334056 | 1.86465893 |           |
| FSTL3     | NM_005860.1 | FSTL3       | 19    | Homo sapiens FLRG; FSRP     | 0.00045911               | 0.00556815 | 1.85739824 |           |
| NICN1     | NM_032316.2 | NICN1       | 3     | Homo sapiens MGC12936       | 0.0002194                | 0.00344591 | 1.85170372 |           |
| FAM71E1   | NM_138411.1 | FAM71E1     | 19    | Homo sapiens FLJ27522; FLJ  | 4.2357E-08               | 1.8716E-05 | 1.84109231 |           |
| IFI6      | NM_002038.2 | IFI6        | 1     | Homo sapiens IFI-6-16; 6-16 | 2.487E-09                | 2.9971E-06 | 1.82811724 |           |
| CIB2      | NM_006383.2 | CIB2        | 15    | Homo sapiens KIP2           | 0.00096409               | 0.00903816 | 1.82419907 |           |
| PARM1     | NM_015393.2 | PARM1       | 4     | Homo sapiens prostate andrc | 9.4335E-08               | 2.842E-05  | 1.78982031 |           |
| MAPT      | NM_016841.2 | MAPT        | 17    | Homo sapiens MTBT2; MAPTI   | 1.0272E-05               | 0.00046954 | 1.77504478 |           |
| WNT3A     | NM_033131.2 | WNT3A       | 1     | Homo sapiens MGC119419; I   | 0.00010795               | 0.0021327  | 1.77006685 |           |
| JUN       | NM_002228.3 | JUN         | 1     | Homo sapiens AP1; c-Jun     | 2.0971E-07               | 4.7118E-05 | 1.76409546 |           |
| SNORD13   | Hs.583806   | SNORD13     | 8     | Homo sapiens U13            | 1.4937E-06               | 0.00015715 | 1.76339952 |           |
| C14orf78  | XM_941311.1 | C14ORF78    |       | PREDICTED: Homo sapiens c   | 6.0619E-06               | 0.00034049 | 1.7522156  |           |
| PRR5      | NM_00101753 | PRR5        | 22    | Homo sapiens PP610; FLJ201  | 0.00756513               | 0.03556148 | 1.7492887  |           |
| C9orf169  | NM_199001.1 | C9ORF169    |       | Homo sapiens chromosome 9   | 0.00029192               | 0.00417443 | 1.73081285 |           |
| CKMT1A    | NM_00101500 | CKMT1A      | 15    | Homo sapiens UMTCK; CKMT    | 9.1866E-07               | 0.00011276 | 1.72848195 |           |
| LOC649970 | XM_939056.1 | LOC649970   |       | PREDICTED: Homo sapiens s   | 1.369E-07                | 3.5583E-05 | 1.72511965 |           |
| CPLX1     | NM_006651.3 | CPLX1       | 4     | Homo sapiens CPX-I; CPX1    | 0.00350665               | 0.02113879 | 1.72260708 |           |
| CTSH      | NM_004390.2 | CTSH        | 15    | Homo sapiens CPSB; ACC-4;   | 7.9409E-06               | 0.00039573 | 1.71200256 |           |
| VASH1     | NM_014909.2 | VASH1       | 14    | Homo sapiens KIAA1036       | 0.00016102               | 0.00280489 | 1.70921223 |           |
| SLC44A3   | NM_152369.2 | SLC44A3     | 1     | Homo sapiens CTL3; MGC45    | 2.9902E-05               | 0.00092398 | 1.70285531 |           |
| RHOU      | NM_021205.4 | RHOU        | 1     | Homo sapiens WRCH1; CDC4    | 0.00263909               | 0.01737891 | 1.69638812 |           |
| C9orf45   | NM_030814.4 | C9ORF45     | 9     | PREDICTED: Homo sapiens c   | 0.00057102               | 0.00639311 | 1.6921201  |           |
| KISS1R    | NM_032551.3 | KISS1R      | 19    | Homo sapiens HOT7T175; A)   | 0.00128239               | 0.01084141 | 1.68526292 |           |
| KRTAP2-2  | XM_496261.2 | KRTAP2-2    |       | PREDICTED: Homo sapiens k   | 0.0025433                | 0.01696727 | 1.67240261 |           |
| LOC649917 | XR_036859.1 | LOC649917   |       | PREDICTED: Homo sapiens n   | 0.00074182               | 0.00756433 | 1.66946245 |           |
| HCP5      | NM_006674.2 | HCP5        | 6     | Homo sapiens P5-1; D6S265   | 1.242E-05                | 0.00053279 | 1.6621437  |           |
| ARL3      | NM_004311.2 | ARL3        | 10    | Homo sapiens ARFL3          | 4.4853E-05               | 0.00123099 | 1.65766414 |           |
| LOC646786 | XM_929738.1 | LOC646786   | 6     | PREDICTED: Homo sapiens s   | 0.00062478               | 0.00076093 | 1.65513589 |           |
| TSPAN13   | NM_014399.3 | TSPAN13     | 7     | Homo sapiens FLJ22934; NE   | 1.7935E-08               | 1.0806E-05 | 1.64928507 |           |
| ST3GAL5   | NM_003896.2 | ST3GAL5     | 2     | Homo sapiens SIAT9; ST3Ga   | 0.00010099               | 0.00205633 | 1.64762718 |           |
| HS1BP3    | NM_022460.3 | HS1BP3      | 2     | Homo sapiens ETM2; FLJ142   | 1.3665E-05               | 0.00056962 | 1.64463698 |           |
| FLJ10986  | NM_018291.2 | FLJ10986    | 1     | Homo sapiens RP11-242B9.1   | 0.00429344               | 0.02411602 | 1.63907728 |           |
| SKAP2     | NM_003930.3 | SKAP2       | 7     | Homo sapiens RA70; SCAP2;   | 1.2176E-05               | 0.00052918 | 1.6062086  |           |
| FAM46B    | NM_052943.2 | FAM46B      | 1     | Homo sapiens MGC16491; M    | 4.3498E-05               | 0.00120128 | 1.6049621  |           |
| FOXD4     | NM_207305.2 | FOXD4       | 9     | Homo sapiens FOXD4A; MGC    | 0.00143627               | 0.01166619 | 1.60086632 |           |
| CDA       | NM_001785.1 | CDA         | 1     | Homo sapiens CDD            | 2.2261E-05               | 0.00077861 | 1.59678056 |           |
| AK1       | NM_000476.1 | AK1         | 9     | Homo sapiens adenylate kina | 2.6123E-05               | 0.00085293 | 1.59233481 |           |
| NUDT7     | NM_00110566 | NUDT7       | 16    | Homo sapiens nudix (nucleos | 1.7178E-06               | 0.00016743 | 1.59222819 |           |
| MOSPD1    | NM_019556.1 | MOSPD1      | X     | Homo sapiens DJ473B4        | 5.1508E-05               | 0.00133358 | 1.59091923 |           |
| SOX8      | NM_014587.2 | SOX8        | 16    | Homo sapiens MGC24837       | 1.0167E-05               | 0.00046958 | 1.58399031 |           |
|           | 39327       | NM_019106.4 | 39327 | 22                          | Homo sapiens SEP3; MGC13 | 1.0862E-06 | 0.00012631 | 1.5835937 |
| PRAME     | NM_206956.1 | PRAME       | 22    | Homo sapiens MAPE; OIP4     | 0.00044621               | 0.00548189 | 1.57327303 |           |
| C1orf53   | NM_00102459 | C1ORF53     | 1     | Homo sapiens chromosome J   | 0.00016105               | 0.00280171 | 1.57226564 |           |
| PPP1R13B  | NM_015316.1 | PPP1R13B    | 14    | Homo sapiens p53BP2-like; p | 0.00104574               | 0.00951432 | 1.5667543  |           |
| VGF       | NM_003378.2 | VGF         | 7     | Homo sapiens VGF nerve GF   | 4.0159E-07               | 6.9137E-05 | 1.56564867 |           |
| RABAC1    | NM_006423.1 | RABAC1      | 19    | Homo sapiens PRAF1; PRA1;   | 2.9062E-05               | 0.00090861 | 1.56106371 |           |
| REEP1     | NM_022912.1 | REEP1       | 2     | Homo sapiens SPG31; C2orf   | 1.6963E-05               | 0.00065365 | 1.55395269 |           |
| ABCG4     | NM_022169.3 | ABCG4       | 11    | Homo sapiens WHITE2         | 0.00552901               | 0.02867469 | 1.53833437 |           |
| LOC645166 | XM_00112944 | LOC645166   | 1     | PREDICTED: Homo sapiens s   | 2.328E-06                | 0.00019656 | 1.53692951 |           |
| CGNL1     | NM_032866.3 | CGNL1       | 15    | Homo sapiens MGC138254; ;   | 8.8908E-05               | 0.0018827  | 1.53446285 |           |
| LOC729776 | Hs.535844   | LOC729776   | 6     | PREDICTED: Homo sapiens h   | 0.00623598               | 0.03108845 | 1.52991312 |           |
| C13orf15  | NM_014059.1 | C13ORF15    | 13    | Homo sapiens RGC-32; KIAA   | 6.3519E-06               | 0.00035084 | 1.52921143 |           |
| SLC30A1   | NM_021194.2 | SLC30A1     | 1     | Homo sapiens ZNT1; ZRC1     | 0.00373118               | 0.02194343 | 1.52657164 |           |

0.5 ACL-Indepen. Upreg

|          |                       |                               |            |            |            |
|----------|-----------------------|-------------------------------|------------|------------|------------|
| GPRC5A   | NM_003979.3 GPRC5A    | 12 Homo sapiens RAIG1; RAI3;  | 1.7952E-05 | 0.00068384 | 1.52488013 |
| RNY4     | NR_004393.1 RNY4      | 7 Homo sapiens Y4; HY4        | 9.2878E-06 | 0.00044129 | 1.50047222 |
| GCA      | NM_012198.2 GCA       | 2 Homo sapiens GCL            | 4.5197E-06 | 0.00028944 | 1.49595061 |
| DENND5B  | NM_144973.2 DENND5B   | 12 Homo sapiens FLJ41648; DK  | 4.8333E-05 | 0.0012814  | 1.49499876 |
| PPP1R14C | NM_030949.1 PPP1R14C  | 6 Homo sapiens KEPI; NY-BR-8  | 2.0878E-05 | 0.000748   | 1.49250241 |
| PCOLCE2  | NM_013363.2 PCOLCE2   | 3 Homo sapiens PCPE2          | 0.00142777 | 0.01161853 | 1.47604457 |
| TUBB4    | NM_006087.2 TUBB4     | 19 Homo sapiens TUBB5; beta-5 | 2.1207E-06 | 0.00018995 | 1.47583194 |
| PECR     | NM_018441.2 PECR      | 2 Homo sapiens HSA250303; T   | 0.0097902  | 0.04242528 | 1.47187386 |
| GNG7     | NM_052847.1 GNG7      | 19 Homo sapiens FLJ00058      | 1.2595E-05 | 0.00053686 | 1.46815405 |
| BAMBI    | NM_012342.2 BAMBI     | 10 Homo sapiens NMA           | 1.0787E-07 | 3.0424E-05 | 1.45239122 |
| TCEA3    | NM_003196.1 TCEA3     | 1 Homo sapiens TFIIS.H; TFIIS | 0.00096582 | 0.00904803 | 1.45147092 |
| ZBTB46   | NM_025224.2 ZBTB46    | 20 Homo sapiens HSA250303; T  | 0.00087657 | 0.00850649 | 1.445994   |
|          | Hs.296031 HS.296031 X | Homo sapiens cDNA clone IM    | 8.2369E-06 | 0.00040742 | 1.44489632 |
| PCYOX1L  | NM_024028.2 PCYOX1L   | 5 Homo sapiens MGC3265        | 0.00974769 | 0.04232407 | 1.44416498 |
| TMEM145  | NM_173633.1 TMEM145   | 19 Homo sapiens FLJ90805      | 0.004577   | 0.02507134 | 1.44147435 |
| ASAP2    | NM_003887.2 ASAP2     | 2 Homo sapiens ArfGAP with Sl | 9.9047E-05 | 0.00202932 | 1.4380021  |
| GPR177   | NM_024911.4 GPR177    | 1 Homo sapiens FLJ23091; C10  | 2.0018E-06 | 0.00018176 | 1.43403553 |
| SH3PXD2A | NM_014631.2 SH3PXD2A  | 10 Homo sapiens SH3MD1; FISL  | 0.00014222 | 0.00258973 | 1.43231572 |
| ITGA2    | NM_002203.2 ITGA2     | 5 Homo sapiens CD49B; VLAA2   | 0.00030819 | 0.00432307 | 1.43107075 |
| EIF4E3   | NM_173359.3 EIF4E3    | 3 Homo sapiens MGC86971; M    | 0.0022168  | 0.01549891 | 1.42759898 |
| SCARNA8  | NR_003009.1 SCARNA8   | 9 Homo sapiens U92            | 1.6156E-06 | 0.00016348 | 1.42659091 |
| GLCE     | NM_015554.1 GLCE      | 15 Homo sapiens KIAA0836; HS  | 1.9997E-06 | 0.00018282 | 1.42005289 |
| DDIT4L   | NM_145244.2 DDIT4L    | 4 Homo sapiens Rtp801L; RED   | 7.6223E-06 | 0.00038565 | 1.41935446 |
| SGPL1    | NM_003901.2 SGPL1     | 10 Homo sapiens KIAA1252; SP  | 0.00108746 | 0.00975328 | 1.41789098 |
| SLC29A4  | NM_00104066.SLC29A4   | 7 Homo sapiens PMAT; FLJ349;  | 2.384E-05  | 0.00081031 | 1.41529829 |
| RIMS3    | NM_014747.2 RIMS3     | 1 Homo sapiens RIM3; NIM3; h  | 0.00011655 | 0.00224897 | 1.41520251 |
| PTPRU    | NM_005704.3 PTPRU     | 1 Homo sapiens GLEPP1; hPTP   | 0.00584331 | 0.02962102 | 1.41284773 |
| KRT18P28 | XR_017689.1 KRT18P28  | 1 PREDICTED: Homo sapiens n   | 8.7356E-05 | 0.00185874 | 1.41010146 |
| LAMC3    | NM_006059.2 LAMC3     | 9 Homo sapiens DKFZp434E20    | 0.00542419 | 0.02825268 | 1.40940255 |
| KIAA1467 | NM_020853.1 KIAA1467  | 12 Homo sapiens DKFZp781O01   | 0.01209145 | 0.0484975  | 1.40612554 |
| NOTCH3   | NM_000435.1 NOTCH3    | 19 Homo sapiens CASIL; CADAS  | 0.00107811 | 0.00971544 | 1.40579024 |
| LRRC20   | NM_207119.1 LRRC20    | 10 Homo sapiens FLJ10751; FLJ | 2.1406E-05 | 0.00075668 | 1.40242704 |
| IGSF3    | NM_001542.2 IGSF3     | 1 Homo sapiens V8; EWI-3; M   | 1.0919E-06 | 0.00012587 | 1.40194113 |
| HLA-B    | NM_005514.5 HLA-B     | 6 Homo sapiens AS; HLA-B-55   | 2.2094E-07 | 4.8813E-05 | 1.39868688 |
| CGN      | NM_020770.1 CGN       | 1 Homo sapiens FLJ39281; DK   | 5.6281E-06 | 0.00033012 | 1.39752024 |
| TLE2     | NM_003260.3 TLE2      | 19 Homo sapiens FLJ41188; GR  | 0.01025339 | 0.04366173 | 1.39534308 |
| TESC     | NM_017899.1 TESC      | 12 Homo sapiens TSC; FLJ2060  | 5.9786E-06 | 0.00033724 | 1.3944236  |
| UBE2L6   | NM_198183.1 UBE2L6    | 11 Homo sapiens UBCH8; RIG-E  | 7.1328E-05 | 0.00161906 | 1.39387522 |
| TIMP2    | XM_941104.1 TIMP2     | PREDICTED: Homo sapiens T     | 7.7686E-08 | 2.5117E-05 | 1.38692649 |
| PCNX     | NM_014982.1 PCNX      | 14 Homo sapiens KIAA0805; PC  | 0.00095365 | 0.00895931 | 1.38641344 |
| C15orf39 | NM_015492.3 C15ORF39  | 15 Homo sapiens DKFZP434H13   | 0.0040435  | 0.02313365 | 1.38053793 |
| TSPAN33  | NM_178562.2 TSPAN33   | 7 Homo sapiens MGC50844; P    | 0.00465846 | 0.02536041 | 1.37865609 |
| CYR61    | NM_001554.3 CYR61     | 1 Homo sapiens CCN1; IGFBP1   | 0.00018668 | 0.00309323 | 1.37726193 |
| MT1F     | NM_005949.1 MT1F      | 16 Homo sapiens MT1; MGC327   | 4.4913E-06 | 0.00028902 | 1.3770431  |
| CORO2A   | NM_052820.2 CORO2A    | 9 Homo sapiens WDR2; CLIPIN   | 0.00178326 | 0.01350798 | 1.37651089 |
| RNU1-3   | NR_004408.1 RNU1-3    | 1 Homo sapiens U1C21          | 0.00074058 | 0.00756323 | 1.37614783 |
| C11orf74 | NM_138787.2 C11ORF74  | 11 Homo sapiens FLJ38678      | 2.091E-05  | 0.00074712 | 1.37213614 |
| HLA-F    | NM_018950.1 HLA-F     | 6 Homo sapiens HLA-5.4; HLA   | 1.1182E-05 | 0.00049907 | 1.36727327 |
| ABHD6    | NM_020676.4 ABHD6     | 3 Homo sapiens abhydrolase d  | 0.00050705 | 0.00592721 | 1.36391644 |
| TMSB15A  | NM_021992.2 TMSB15A X | Homo sapiens Tb15; TMSNB;     | 4.4195E-08 | 1.8898E-05 | 1.36332395 |
| NKD2     | NM_033120.2 NKD2      | 5 Homo sapiens Naked2         | 5.1353E-07 | 7.7357E-05 | 1.36049127 |
| ENC1     | NM_003633.1 ENC1      | 5 Homo sapiens PIG10; NRPB;   | 0.00020587 | 0.00330392 | 1.35882319 |
| TAGLN2   | NM_003564.1 TAGLN2    | 1 Homo sapiens KIAA0120; HA   | 2.3462E-06 | 0.00019318 | 1.35839335 |
| DSP      | NM_004415.2 DSP       | 6 Homo sapiens DPI; DPII      | 0.00085941 | 0.00837671 | 1.35427971 |
| TMEM98   | NM_015544.2 TMEM98    | 17 Homo sapiens DKFZP564K19   | 2.7633E-05 | 0.00088909 | 1.34562352 |
| SCPEP1   | NM_021626.1 SCPEP1    | 17 Homo sapiens RISC; HSCP1   | 5.5359E-07 | 7.8907E-05 | 1.34367023 |
| ASMTL    | XM_942506.1 ASMTL     | PREDICTED: Homo sapiens a     | 3.8447E-05 | 0.00110075 | 1.34080484 |
| ADARB1   | NM_00103304 ADARB1    | 21 Homo sapiens ADAR2a; ADA   | 0.01033456 | 0.04382434 | 1.33277674 |
| RAB31    | NM_006868.2 RAB31     | 18 Homo sapiens Rab22B        | 6.9652E-07 | 9.052E-05  | 1.33069288 |
| CYP26B1  | NM_019885.2 CYP26B1   | 2 Homo sapiens CYP26A2; MGC   | 1.3693E-05 | 0.00056899 | 1.33040109 |
| C7orf70  | XM_935791.1 C7ORF70   | 7 Homo sapiens chromosome 7   | 0.00014351 | 0.00260603 | 1.32755392 |
| GRK5     | NM_005308.2 GRK5      | 10 Homo sapiens GPRK5         | 0.0002536  | 0.0038463  | 1.32292273 |
| CALB2    | NM_001740.2 CALB2     | 16 Homo sapiens CAL2          | 0.00357814 | 0.02146235 | 1.32229264 |
| ASS1     | NM_000050.3 ASS1      | 9 Homo sapiens CTLN1; ASS     | 2.1313E-06 | 0.00018835 | 1.31922075 |
| PINK1    | NM_032409.1 PINK1     | 1 Homo sapiens FLJ27236; PA   | 0.00016465 | 0.00284943 | 1.31443718 |
| CAMTA1   | NM_015215.1 CAMTA1    | 1 Homo sapiens KIAA0833       | 0.01150212 | 0.04694338 | 1.31301408 |
| RTN4R    | NM_023004.5 RTN4R     | 22 Homo sapiens NOGOR; NGR    | 0.00839929 | 0.03810437 | 1.31233684 |
| LGMN     | NM_005606.5 LGMN      | 14 Homo sapiens AEP; LGMN1;   | 4.6145E-05 | 0.00125863 | 1.30793551 |
| TMEM205  | NM_198536.1 TMEM205   | 19 Homo sapiens UNQ501; MGC   | 5.2169E-07 | 7.684E-05  | 1.30736331 |
| WFS1     | NM_006005.2 WFS1      | 4 Homo sapiens DFNA14; DID    | 6.3902E-06 | 0.00034859 | 1.30397839 |

0.5 ACL-Indepen. Upreg

|             |                          |                                |            |             |            |
|-------------|--------------------------|--------------------------------|------------|-------------|------------|
| ZNFX1       | NM_021035.1 ZNFX1        | 20 Homo sapiens MGC131926; I   | 0.00028884 | 0.00415274  | 1.30324144 |
| HEYL        | NM_014571.2 HEYL         | 1 Homo sapiens MGC12623; H     | 0.00031745 | 0.00440647  | 1.30188791 |
| CDK2AP2     | NM_005851.3 CDK2AP2      | 11 Homo sapiens p14; FLJ10636  | 0.00703915 | 0.03380832  | 1.29122095 |
| DKK1        | NM_012242.2 DKK1         | 10 Homo sapiens DKK-1; SK      | 4.7548E-06 | 0.00029872  | 1.29110335 |
| BCAS4       | NM_017843.3 BCAS4        | 20 Homo sapiens FLJ20495       | 0.00067307 | 0.00707549  | 1.28950494 |
| JUNB        | NM_002229.2 JUNB         | 19 Homo sapiens jun B proto-or | 0.00451137 | 0.02484536  | 1.28797363 |
| HSPA12A     | XM_945467.1 HSPA12A      | PREDICTED: Homo sapiens h      | 0.01025503 | 0.04365468  | 1.27923099 |
| HCFC1R1     | NM_00100201 HCFC1R1      | 16 Homo sapiens MGC99622; H    | 2.3594E-06 | 0.00019307  | 1.27787686 |
| PALM        | NM_002579.1 PALM         | 19 Homo sapiens KIAA0270       | 0.0004324  | 0.0053619   | 1.27778299 |
| NEK6        | NM_014397.3 NEK6         | 9 Homo sapiens SID6-1512       | 0.00718882 | 0.0343158   | 1.2759933  |
| PXDN        | NM_012293.1 PXDN         | 2 Homo sapiens D2S448E; D2S    | 0.00817429 | 0.03740366  | 1.27285486 |
| SAT1        | NM_002970.1 SAT1         | Homo sapiens KFSF; SSAT-1      | 1.5629E-07 | 3.9091E-05  | 1.27265243 |
| COBL        | NM_015198.2 COBL         | 7 Homo sapiens DKFZp686G13     | 2.0413E-05 | 0.00074544  | 1.27197503 |
| SLC27A1     | NM_198580.1 SLC27A1      | 19 Homo sapiens FATP1; ACSVL   | 0.00026825 | 0.00396869  | 1.27196731 |
| CTSL2       | NM_001333.2 CTSL2        | 9 Homo sapiens CTSV; CATL2;    | 1.0741E-06 | 0.00012601  | 1.27046828 |
| CTSB        | NM_001908.3 CTSB         | 8 Homo sapiens CP5B; APPS      | 0.00133818 | 0.01109373  | 1.26700649 |
| EFNB2       | NM_004093.2 EFNB2        | 13 Homo sapiens MGC126227; I   | 3.1321E-06 | 0.00023862  | 1.26432595 |
| SMYD3       | NM_022743.1 SMYD3        | 1 Homo sapiens bA74P14.1; ZI   | 5.7571E-05 | 0.00141851  | 1.25701591 |
| CHD7        | NM_017780.2 CHD7         | 8 Homo sapiens FLJ20361; KIA   | 4.6069E-05 | 0.00125917  | 1.25653786 |
| TLE1        | NM_005077.3 TLE1         | 9 PREDICTED: Homo sapiens k    | 0.00284124 | 0.001826549 | 1.25547836 |
| KRT18P13    | XM_00172695 KRT18P13     | 9 PREDICTED: Homo sapiens k    | 2.104E-05  | 0.00074974  | 1.25270873 |
| PLEKHG4     | NM_015432.2 PLEKHG4      | 16 Homo sapiens puratrophin1;  | 0.01064626 | 0.04461801  | 1.25244458 |
| LOC10013413 | XM_00172085 LOC100134134 | PREDICTED: Homo sapiens s      | 5.795E-07  | 8.0862E-05  | 1.25074269 |
| PDLIM1      | NM_020992.2 PDLIM1       | 10 Homo sapiens CLP36; CLP-36  | 5.507E-06  | 0.0003259   | 1.25037524 |
| ISG15       | NM_005101.1 ISG15        | 1 Homo sapiens GIP2; UCRP; I   | 9.2997E-07 | 0.0001131   | 1.24906853 |
| RRAS        | NM_006270.2 RRAS         | 19 Homo sapiens related RAS vi | 3.135E-06  | 0.00023747  | 1.24564172 |
| CRABP2      | NM_001878.2 CRABP2       | 1 Homo sapiens CRABP-II; RBF   | 4.2788E-07 | 6.917E-05   | 1.24287858 |
| PCMTD2      | NM_018257.1 PCMTD2       | 20 Homo sapiens FLJ10883; C20  | 0.00320284 | 0.01983962  | 1.24161975 |
| LOC647954   | XM_938141.1 LOC647954    | PREDICTED: Homo sapiens n      | 1.1067E-05 | 0.00049562  | 1.23918443 |
| FGFR3       | NM_000142.2 FGFR3        | 4 Homo sapiens HSFGR3EX; J     | 2.7808E-05 | 0.00089039  | 1.23676158 |
| XPR1        | NM_004736.3 XPR1         | 1 Homo sapiens xenotropic anc  | 5.6282E-05 | 0.0014077   | 1.22951058 |
| CREB3L2     | NM_194071.2 CREB3L2      | 7 Homo sapiens MGC131709; I    | 8.8311E-05 | 0.00187303  | 1.22853852 |
| ZCCHC14     | NM_015144.1 ZCCHC14      | 16 Homo sapiens MGC126527; I   | 0.0001438  | 0.0026076   | 1.22822191 |
| MT1X        | NM_005952.2 MT1X         | 16 Homo sapiens MT1; MT-1I     | 2.5898E-06 | 0.00020681  | 1.22705079 |
| MGC4677     | XM_939115.1 MGC4677      | 2 Homo sapiens MGC17532; M     | 0.00221272 | 0.01551127  | 1.22482419 |
| AP1B1       | NM_145730.1 AP1B1        | 22 Homo sapiens CLAPB2; ADTE   | 0.00329317 | 0.02021033  | 1.22346888 |
| MAOA        | NM_000240.2 MAOA         | Homo sapiens monoamine ox      | 0.00711224 | 0.03409762  | 1.22151018 |
| ITM2C       | NM_00101251 ITM2C        | 2 Homo sapiens E25; ITM3; BF   | 2.5149E-07 | 5.3769E-05  | 1.22139319 |
| OBFC1       | NM_024928.3 OBFC1        | 10 Homo sapiens bA541N10.2; I  | 9.6311E-05 | 0.00198862  | 1.22104766 |
| GLIPR2      | NM_022343.2 GLIPR2       | 9 Homo sapiens GLIPR2; GAPR    | 1.2357E-05 | 0.00053356  | 1.22099733 |
| WDR48       | NM_020839.2 WDR48        | 3 Homo sapiens P80; KIAA144'   | 0.00393011 | 0.02273014  | 1.22052476 |
| LOC149501   | XR_017100.2 LOC149501    | 1 PREDICTED: Homo sapiens n    | 3.9257E-07 | 6.8473E-05  | 1.21977235 |
| YIPF1       | NM_018982.3 YIPF1        | 1 Homo sapiens FinGER1; DJ16   | 0.00043485 | 0.00538726  | 1.21721634 |
| TBCE        | NM_003193.3 TBCE         | 1 Homo sapiens KCS; KCS1; p    | 0.00018328 | 0.00305603  | 1.21645309 |
| ARHGFE3     | NM_019555.1 ARHGFE3      | 3 Homo sapiens DKFZP434F24     | 4.7539E-05 | 0.00126541  | 1.2142395  |
| FLNB        | NM_001457.1 FLNB         | 3 Homo sapiens FLN1L; filamin  | 2.5978E-05 | 0.00085027  | 1.21252157 |
| LOC10012966 | XM_00171360 LOC10012966  | 6 PREDICTED: Homo sapiens h    | 6.3591E-06 | 0.00034978  | 1.21244442 |
| AXIN2       | NM_004655.2 AXIN2        | 17 Homo sapiens MGC126582; I   | 0.00048986 | 0.00580305  | 1.21241362 |
| TM7SF2      | NM_003273.1 TM7SF2       | 11 Homo sapiens ANG1; DHCR1    | 8.2681E-05 | 0.00177637  | 1.20854041 |
| HN1         | NM_016185.2 HN1          | 17 Homo sapiens HN1A; ARM2     | 7.4486E-06 | 0.0003857   | 1.20775836 |
| DUSP6       | NM_001946.2 DUSP6        | 12 Homo sapiens MKP3; PYST1    | 4.6333E-06 | 0.00029529  | 1.20517836 |
| C17orf96    | NM_00113067 C17ORF96     | 17 Homo sapiens chromosome J   | 0.00021525 | 0.00340488  | 1.20371019 |
| FLNC        | NM_001458.2 FLNC         | 7 Homo sapiens FLN2; ABPL; A   | 4.3362E-05 | 0.0012      | 1.20351749 |
| MCOLN2      | NM_153259.2 MCOLN2       | 1 Homo sapiens TRP-ML2; TRP    | 0.00031858 | 0.00441749  | 1.20325824 |
| FOXC1       | NM_001453.1 FOXC1        | 6 Homo sapiens FREAC3; FKHL    | 4.2541E-07 | 6.9621E-05  | 1.20312359 |
| SLC25A44    | NM_014655.1 SLC25A44     | 1 Homo sapiens FLJ90431; KIA   | 0.00562285 | 0.02892375  | 1.20297231 |
| SERPINB5    | NM_002639.2 SERPINB5     | 18 Homo sapiens PI5; maspin    | 0.00337087 | 0.02054448  | 1.19741815 |
| NFIL3       | NM_005384.2 NFIL3        | 9 Homo sapiens IL3BP1; NF-IL   | 0.00262085 | 0.0173277   | 1.19610237 |
| CYTSA       | NM_015330.1 CYTSA        | 22 Homo sapiens KIAA0376       | 0.00029172 | 0.00417603  | 1.19448382 |
| KCNH3       | NM_012284.1 KCNH3        | 12 Homo sapiens BEC1; ELK2; h  | 0.00074485 | 0.00758349  | 1.19173219 |
| TUBB6       | XM_940079.1 TUBB6        | PREDICTED: Homo sapiens t      | 0.00037863 | 0.00496449  | 1.19147906 |
| LOC151162   | NR_024275.1 LOC151162    | 2 Homo sapiens hypothetical h  | 1.2962E-05 | 0.00054546  | 1.18880332 |
| TSPAN9      | NM_006675.3 TSPAN9       | 12 Homo sapiens PP1057; NET-!  | 3.4506E-05 | 0.00102788  | 1.18810831 |
| NDRG3       | NM_022477.2 NDRG3        | 20 Homo sapiens FLJ13556       | 0.00065329 | 0.0069447   | 1.18481686 |
| C10orf78    | NM_145247.4 C10ORF78     | 10 Homo sapiens RP11-373N18.   | 0.00159869 | 0.01258445  | 1.18392606 |
| DPYSL2      | NM_001386.4 DPYSL2       | 8 Homo sapiens DRP2; DRP-      | 5.1424E-06 | 0.00031269  | 1.18323382 |
| MGC61598    | XM_939432.1 MGC61598     | PREDICTED: Homo sapiens s      | 0.00238374 | 0.01626291  | 1.18235432 |
| DCUN1D3     | NM_173475.1 DCUN1D3      | 16 Homo sapiens MGC48972; FI   | 0.00288718 | 0.01843567  | 1.18171094 |
| JARID2      | NM_004973.2 JARID2       | 6 Homo sapiens JMJ             | 0.00146953 | 0.01189261  | 1.18157032 |
| C6orf129    | NM_138493.1 C6ORF129     | 6 Homo sapiens HSPC265; MG     | 0.00357149 | 0.0214322   | 1.18033262 |

0.5 ACL-Indepen. Upreg

|           |                       |                                 |            |            |            |
|-----------|-----------------------|---------------------------------|------------|------------|------------|
| SH3BP4    | NM_014521.1 SH3BP4    | 2 Homo sapiens BOG25; TTP       | 0.0002651  | 0.00394403 | 1.17878049 |
| PCCA      | NM_000282.2 PCCA      | 13 Homo sapiens propionyl Coe   | 0.01000303 | 0.04302407 | 1.17855799 |
| RAB40B    | NM_006822.1 RAB40B    | 17 Homo sapiens FLJ42385; SE    | 0.00019674 | 0.00319608 | 1.17422609 |
| ATOX1     | NM_004045.3 ATOX1     | 5 Homo sapiens MGC138453; I     | 5.5711E-05 | 0.001404   | 1.17288221 |
| STX8      | NM_004853.1 STX8      | 17 Homo sapiens CARB            | 0.00041947 | 0.00526067 | 1.17175763 |
| TMEM158   | NM_015444.1 TMEM158   | 3 Homo sapiens BBP; DKFZp58     | 4.8996E-06 | 0.00030636 | 1.17030503 |
| LOC653344 | XM_933085.1 LOC653344 | 15 PREDICTED: Homo sapiens s    | 0.00057939 | 0.00645409 | 1.16913856 |
| TUBB2A    | TUBB TUBB2A           | 6 Homo sapiens TUBB; TUBB2;     | 0.00068984 | 0.00718909 | 1.16782448 |
| CYB5A     | NM_148923.2 CYB5A     | 18 Homo sapiens MCB5; CYB5      | 0.00063306 | 0.00680047 | 1.16566253 |
| KLF6      | NM_001300.4 KLF6      | 10 Homo sapiens GBF; ZF9; STJ   | 1.8191E-05 | 0.00068898 | 1.16341027 |
| RGS10     | NM_002925.3 RGS10     | 10 Homo sapiens regulator of G  | 0.00022205 | 0.00347514 | 1.1622785  |
| CXADR     | NM_001338.3 CXADR     | 21 Homo sapiens CAR; HCAR       | 0.0042642  | 0.02397211 | 1.16189807 |
| SLC25A4   | NM_001151.2 SLC25A4   | 4 Homo sapiens PEO2; ANT1; I    | 5.7959E-05 | 0.00142279 | 1.15962641 |
| KLF2      | NM_016270.2 KLF2      | 19 Homo sapiens LKLF            | 3.7441E-06 | 0.0002585  | 1.15911209 |
| ISYNA1    | NM_016368.3 ISYNA1    | 19 Homo sapiens IPS             | 0.00214586 | 0.01517902 | 1.15845536 |
| TPRG1L    | NM_182752.3 TPRG1L    | 1 Homo sapiens RP11-46F15.3     | 3.7661E-05 | 0.00109004 | 1.15785863 |
| LGALS1    | NM_002305.2 LGALS1    | 22 Homo sapiens DKFZp686E23     | 1.8324E-06 | 0.0001735  | 1.15558972 |
| CKB       | NM_001823.3 CKB       | 14 Homo sapiens B-CK; CKBB      | 7.4016E-06 | 0.00038628 | 1.15505225 |
| C20orf46  | NM_018354.1 C20ORF46  | 20 Homo sapiens FLJ11190        | 0.00182952 | 0.01368631 | 1.15474473 |
| CCDC24    | NM_152499.1 CCDC24    | 1 Homo sapiens RP5-1198O20.     | 0.00090712 | 0.00866335 | 1.15344502 |
| TUBB4Q    | NM_020040.3 TUBB4Q    | 4 Homo sapiens tubulin, beta p  | 0.00081874 | 0.00809342 | 1.1527763  |
| C8orf55   | NM_016647.1 C8ORF55   | 8 Homo sapiens DSCD75           | 0.00102529 | 0.00937325 | 1.15164796 |
| ECGF1     | NM_001953.2 ECGF1     | 22 Homo sapiens TP; PDECGF; t   | 0.00042519 | 0.00530722 | 1.14998024 |
|           | Hs.534061 Hs.534061   | 17 full-length cDNA clone XCL0E | 0.00049969 | 0.0058723  | 1.14951461 |
| FLJ40504  | NM_173624.1 FLJ40504  | 17 Homo sapiens MGC138233; I    | 1.7247E-06 | 0.00016688 | 1.14913918 |
| KDELR3    | NM_016657.1 KDELR3    | 22 Homo sapiens ERD2L3          | 0.00483766 | 0.02601545 | 1.14874766 |
| LHX2      | NM_004789.3 LHX2      | 9 Homo sapiens LH2; hLhx2; M    | 0.00708712 | 0.03400176 | 1.14848047 |
| RAB26     | NM_014353.4 RAB26     | 16 Homo sapiens V46133          | 0.00067307 | 0.00706993 | 1.14823219 |
| GAMT      | NM_138924.1 GAMT      | 19 Homo sapiens TP53I2; PIG2    | 0.00024666 | 0.00377567 | 1.14501179 |
| SRPX      | NM_006307.2 SRPX      | X Homo sapiens DRS; ETX1        | 0.00010077 | 0.0020551  | 1.14476315 |
| HERC5     | NM_016323.1 HERC5     | 4 Homo sapiens CEBP1; CEB1      | 0.00781371 | 0.0363306  | 1.1434594  |
| MAPK3     | NM_002746.1 MAPK3     | X Homo sapiens PRKM3; ERK1;     | 0.00190619 | 0.01406147 | 1.14324097 |
| CFD       | NM_001928.2 CFD       | 19 Homo sapiens DF; ADN; PFD    | 5.0839E-06 | 0.00031056 | 1.14235428 |
| ARHGEF10  | NM_014629.2 ARHGEF10  | 8 Homo sapiens GEF10; DKFZp     | 0.00051868 | 0.00600485 | 1.13966086 |
| CSRP2     | NM_001321.1 CSRP2     | 12 Homo sapiens CRP2; LMO5; :   | 0.00223055 | 0.01555399 | 1.1369888  |
| DCAF6     | NM_00101797 DCAF6     | 1 Homo sapiens RP4-745I14.1     | 0.0048704  | 0.02610674 | 1.1304873  |
| RNU1-5    | NR_004400.1 RNU1-5    | 1 Homo sapiens HSD4             | 0.00298626 | 0.01886836 | 1.13010881 |
| SLC4A2    | NM_003040.2 SLC4A2    | 7 Homo sapiens HKB3; NBND3      | 0.00405415 | 0.02315457 | 1.12849511 |
| RHOB      | NM_004040.2 RHOB      | 2 Homo sapiens ARH6; MST08      | 0.00013965 | 0.00256044 | 1.12846661 |
| PSAP      | NM_002778.1 PSAP      | 10 Homo sapiens GLBA; SAP1; I   | 2.4822E-05 | 0.00082467 | 1.12724148 |
| CDKN3     | NM_005192.2 CDKN3     | 14 Homo sapiens CD11; KAP; M    | 0.00048749 | 0.00579572 | 1.12687976 |
| PLCG2     | NM_002661.1 PLCG2     | 16 Homo sapiens phospholipase   | 0.00126203 | 0.0107309  | 1.12542507 |
| BLVRB     | NM_000713.1 BLVRB     | X Homo sapiens BVRB; MGC11      | 0.00869319 | 0.03910314 | 1.12458707 |
| CRIP1     | NM_001311.3 CRIP1     | 14 Homo sapiens CRIP; CRP1; C   | 0.00039235 | 0.00503483 | 1.12378086 |
| SLC2A1    | NM_006516.1 SLC2A1    | 1 Homo sapiens MGC141895; I     | 1.0246E-05 | 0.00047161 | 1.1233679  |
| LITAF     | NM_004862.2 LITAF     | 16 Homo sapiens MGC125274; I    | 5.5805E-05 | 0.00140371 | 1.12309227 |
| EGR1      | NM_001964.2 EGR1      | 5 Homo sapiens G0S30; AT225     | 0.00014448 | 0.00261286 | 1.1225894  |
| FBXO31    | NM_024735.2 FBXO31    | 16 Homo sapiens FBX14; Fbx31    | 0.00246946 | 0.01666759 | 1.12127929 |
| GPD1L     | NM_015141.2 GPD1L     | 3 Homo sapiens KIAA0089         | 0.00191083 | 0.01408001 | 1.11873434 |
| CALM1     | NM_006888.2 CALM1     | 14 Homo sapiens PHKD; CALML     | 0.00045428 | 0.00525978 | 1.11755538 |
| IGF2BP3   | NM_006547.2 IGF2BP3   | 7 Homo sapiens IMP-3; VICKZ     | 0.00117027 | 0.01026002 | 1.11534659 |
| BLVRA     | NM_000712.3 BLVRA     | 7 Homo sapiens BVRA; BLVR       | 0.00136135 | 0.0112157  | 1.11516888 |
| CDKN1A    | NM_078467.1 CDKN1A    | 6 Homo sapiens P21; MDA-6; S    | 0.00045066 | 0.00552127 | 1.11240306 |
| ECHDC2    | NM_018281.1 ECHDC2    | 1 Homo sapiens FLJ10948         | 0.00920442 | 0.04063063 | 1.11195739 |
| BIN1      | NM_139343.1 BIN1      | 2 Homo sapiens MGC10367; AI     | 0.00265647 | 0.01743276 | 1.10980558 |
| GMDS      | NM_001500.2 GMDS      | 6 Homo sapiens GMD              | 0.0006661  | 0.00703568 | 1.10500357 |
| C12orf44  | NM_021934.3 C12ORF44  | 12 Homo sapiens FLJ11773        | 0.00671611 | 0.0326831  | 1.10468192 |
| PIR       | NM_00101810 PIR       | X Homo sapiens pirin (iron-bind | 0.00323374 | 0.01996577 | 1.10314828 |
| SEPX1     | NM_016332.2 SEPX1     | 16 Homo sapiens MSRB1; SELR;    | 0.01006017 | 0.04315779 | 1.09773052 |
| GLRX      | NM_002064.1 GLRX      | 5 Homo sapiens GRX; GRX1; M     | 0.00183678 | 0.01371738 | 1.09604458 |
| KLF13     | NM_015995.2 KLF13     | 15 Homo sapiens NSLP1; FKL2     | 0.00973938 | 0.04231571 | 1.09584708 |
| C17orf61  | NM_152766.2 C17ORF61  | 17 Homo sapiens MGC40107        | 9.1517E-05 | 0.00192564 | 1.09556927 |
| IDH1      | NM_005896.2 IDH1      | 2 Homo sapiens PICD; IDH; ID    | 0.00017691 | 0.00299506 | 1.09539555 |
| MTAP      | NM_002451.3 MTAP      | 9 Homo sapiens c86fus; MSAP     | 0.00560614 | 0.02889387 | 1.09457458 |
| ARHGEF18  | NM_015318.2 ARHGEF18  | 19 Homo sapiens KIAA0521; MC    | 0.00713126 | 0.0341394  | 1.09146636 |
| ACADVL    | NM_000018.2 ACADVL    | 17 Homo sapiens ACAD6; VLCAI    | 0.00666044 | 0.0325316  | 1.08826547 |
| LYRM1     | NM_020424.2 LYRM1     | 16 Homo sapiens A211C6.1        | 0.00083351 | 0.0082088  | 1.08818576 |
| HES4      | NM_021170.2 HES4      | 1 Homo sapiens hairy and enh    | 0.00072175 | 0.00742819 | 1.08752753 |
| MSX1      | NM_002448.1 MSX1      | 4 Homo sapiens HOX7; HYD1       | 0.00196824 | 0.01430424 | 1.08586835 |
| LOC653506 | XM_927769.1 LOC653506 | 17 PREDICTED: Homo sapiens s    | 0.00673869 | 0.03275692 | 1.08179116 |



### 0.5 ACL-Indepen. Upreg

|        |                    |                                |            |            |            |
|--------|--------------------|--------------------------------|------------|------------|------------|
| VKORC1 | NM_024006.4 VKORC1 | 16 Homo sapiens MST134; EDTF   | 0.00092509 | 0.00877184 | 1.07878406 |
| SRXN1  | NM_080725.1 SRXN1  | 20 Homo sapiens Npn3; SRX1; (  | 0.0118592  | 0.04795776 | 1.07631287 |
| HES6   | NM_018645.3 HES6   | 2 Homo sapiens hairy and enh:  | 0.00896256 | 0.03990855 | 1.07035634 |
| ANXA5  | NM_001154.2 ANXA5  | 4 Homo sapiens PP4; ANX5; E!   | 0.0005483  | 0.0062335  | 1.06971357 |
| FOSB   | NM_006732.1 FOSB   | 19 Homo sapiens GOS3; GOS3;    | 0.01252152 | 0.04966643 | 1.06063064 |
| TRIB1  | NM_025195.2 TRIB1  | 8 Homo sapiens GIG2; SKIP1;    | 0.00595385 | 0.0299864  | 1.05144393 |
| PCMT1  | NM_005389.1 PCMT1  | 6 Homo sapiens protein-L-isoa: | 0.00404857 | 0.02314265 | 1.05100515 |
| S100A4 | NM_002961.2 S100A4 | 1 Homo sapiens FSP1; MTS1; :   | 0.00119669 | 0.0104022  | 1.05044035 |
| DAD1   | NM_001344.1 DAD1   | 14 Homo sapiens OST2           | 0.0044285  | 0.02455217 | 1.04756449 |
| CAP1   | NM_006367.2 CAP1   | 1 Homo sapiens CAP1-PEN; CA    | 0.00574623 | 0.02925195 | 1.04582882 |

## 2.0 ACL-Dependent Upreg

| SYMBOL      | SEARCH_KEY  | ILMN_GENE    | CHROMOSOME | DEFINITION                  | SYNONYMS   | pval       | fdr        | fold       |
|-------------|-------------|--------------|------------|-----------------------------|------------|------------|------------|------------|
| ATP2B1      | NM_00100132 | ATP2B1       | 12         | Homo sapiens PMCA1; PMCA    |            | 0.02887829 | 0.0458241  | 380.706788 |
| LEAP2       | NM_052971.2 | LEAP2        | 5          | Homo sapiens LEAP-2         |            | 0.00117781 | 0.00375049 | 187.711056 |
| DKFZp686O24 | NM_00100991 | DKFZP686O24  | 11         | Homo sapiens DKFZp686I21    |            | 0.0196246  | 0.03393479 | 78.3045689 |
| GRHL2       | NM_024915.1 | GRHL2        | 8          | Homo sapiens DFNA28; BOM    |            | 0.00153514 | 0.00462285 | 67.8852216 |
| FRRS1       | NM_00101366 | FRRS1        | 1          | Homo sapiens SDR2; SDR2     |            | 0.03141708 | 0.04873549 | 64.751661  |
| LOC652669   | XM_942246.1 | LOC652669    |            | PREDICTED: Homo sapiens s   |            | 0.00065473 | 0.00238059 | 57.9808291 |
| ICOSLG      | NM_015259.4 | ICOSLG       | 21         | Homo sapiens ICOSL; B7RP1   |            | 0.00277927 | 0.00730652 | 53.0487356 |
|             | Hs.545780   | HS.545780    | 9          | zu71d08.s1 Soares_testis_NI |            | 0.00058    | 0.00217584 | 52.0407995 |
|             | Hs.564221   | HS.564221    | 11         | UI-H-BW1-anf-b-07-0-UI.s1   |            | 0.01517541 | 0.02778877 | 37.5005751 |
| MGC42630    | NM_175923.3 | MGC42630     | 9          | Homo sapiens hypothetical p |            | 0.01422533 | 0.02647276 | 30.9781022 |
| SNORD100    | NR_002435.1 | SNORD100     | 6          | Homo sapiens HBII-429       |            | 0.00186338 | 0.00534755 | 29.2518022 |
| WNT10B      | NM_003394.2 | WNT10B       | 12         | Homo sapiens WNT-12         |            | 0.00861599 | 0.01782234 | 27.8760066 |
| DNAJC1      | NM_022365.2 | DNAJC1       | 10         | Homo sapiens MGC131954; I   |            | 0.01248663 | 0.0239085  | 25.4989305 |
| RCC1        | NM_001269.3 | RCC1         | 1          | Homo sapiens RCC1-I; CHC1   | 1.03E-05   | 0.0001138  | 0.0001138  | 25.2348628 |
| UTS2        | NM_006786.2 | UTS2         | 1          | Homo sapiens UTS2; PRO10    | 0.00011682 | 0.00064479 | 0.00064479 | 23.0484031 |
| C9orf82     | NM_024828.2 | C9ORF82      | 9          | Homo sapiens RP11-337A23.   | 0.00116129 | 0.00371531 | 0.00371531 | 22.8121823 |
| GPATCH8     | NM_00100290 | GPATCH8      | 17         | Homo sapiens GPATCH8; KIAA  | 0.02666606 | 0.04310034 | 0.04310034 | 21.6782716 |
| ZNF30       | NM_194325.1 | ZNF30        | 19         | Homo sapiens KOX28; FLJ20   | 0.02341976 | 0.03902575 | 0.03902575 | 21.4668797 |
| CARD8       | NM_014959.1 | CARD8        | 19         | Homo sapiens NDPP1; CARD    | 0.00344409 | 0.00862252 | 0.00862252 | 21.4527089 |
| SLC9A6      | NM_006359.1 | SLC9A6       |            | Homo sapiens KIAA0267; NH   | 0.00628012 | 0.01385273 | 0.01385273 | 21.3912333 |
| ALDH3B1     | NM_00103001 | ALDH3B1      | 11         | Homo sapiens FLJ26433; ALI  | 0.00025517 | 0.00114403 | 0.00114403 | 20.9002126 |
| RSF1        | NM_016578.3 | RSF1         | 11         | Homo sapiens HBXAP; p325;   | 0.01226794 | 0.02356868 | 0.02356868 | 20.8213883 |
| TFAP2E      | NM_178548.2 | TFAP2E       | 1          | Homo sapiens MGC49007; AI   | 0.01199014 | 0.02317426 | 0.02317426 | 19.0196104 |
| MIR1253     | NR_031654.1 | MIR1253      |            | Homo sapiens microRNA 125   | 0.02960213 | 0.04664579 | 0.04664579 | 18.5397991 |
| SNORD4B     | NR_000009.1 | SNORD4B      | 17         | Homo sapiens RNU101B; Z1    | 0.01398999 | 0.02609736 | 0.02609736 | 17.5770448 |
| SIM2        | NM_005069.2 | SIM2         | 21         | Homo sapiens MGC119447; S   | 0.00553049 | 0.01249852 | 0.01249852 | 17.4406967 |
| SLC6A16     | NM_014037.2 | SLC6A16      | 19         | Homo sapiens NTT5           | 0.01535235 | 0.02807493 | 0.02807493 | 17.2712149 |
| TMX4        | NM_021156.2 | TMX4         | 20         | Homo sapiens DJ971N18.2; I  | 8.39E-07   | 2.05E-05   | 2.05E-05   | 16.6638646 |
| HM13        | NM_030789.2 | HM13         | 20         | Homo sapiens MSTP086; H1    | 0.00097661 | 0.00322705 | 0.00322705 | 16.270388  |
| RLTPR       | NM_00101383 | RLTPR        | 16         | Homo sapiens LRRC16C        | 0.00404625 | 0.00976563 | 0.00976563 | 15.4909779 |
| LOC644760   | XM_932354.1 | LOC644760    |            | PREDICTED: Homo sapiens h   | 0.00638456 | 0.01403183 | 0.01403183 | 15.0797845 |
| UNC5C       | NM_003728.2 | UNC5C        | 4          | Homo sapiens UNC5H3         | 0.01705758 | 0.03042536 | 0.03042536 | 13.4402125 |
|             | Hs.581028   | HS.581028    | 22         | DA778026 OCBBF2 Homo sa     | 0.02342898 | 0.03903514 | 0.03903514 | 12.4029752 |
| CD109       | NM_133493.1 | CD109        | 6          | Homo sapiens FLJ38569; DK   | 0.0017987  | 0.0052087  | 0.0052087  | 11.9766099 |
| ZNF564      | NM_144976.2 | ZNF564       | 19         | Homo sapiens MGC26914       | 0.00022144 | 0.00103779 | 0.00103779 | 11.9358417 |
| NACC2       | NM_144653.3 | NACC2        | 9          | Homo sapiens BTBD14; MGC    | 0.0288433  | 0.04578194 | 0.04578194 | 11.2401684 |
|             | Hs.224678   | HS.224678    | 10         | RST34529 Athersys RAGE Lit  | 0.00231567 | 0.00631693 | 0.00631693 | 10.8074064 |
| C1QA        | NM_015991.1 | C1QA         | 1          | Homo sapiens complement c   | 0.00070022 | 0.00250248 | 0.00250248 | 10.5515976 |
| LOC643233   | XM_926592.1 | LOC643233    |            | PREDICTED: Homo sapiens s   | 3.09E-05   | 0.00025463 | 0.00025463 | 10.4309233 |
| ARL17P1     | NM_016632.1 | ARL17P1      | 17         | Homo sapiens ARF1P2; ARL1   | 0.01513039 | 0.02773905 | 0.02773905 | 10.3694002 |
| LOC641825   | XM_935575.1 | LOC641825    |            | PREDICTED: Homo sapiens h   | 0.00140871 | 0.00432116 | 0.00432116 | 10.3245217 |
| GPD2        | NM_000408.2 | GPD2         | 2          | Homo sapiens mGPDH; GDH     | 0.015745   | 0.02861004 | 0.02861004 | 10.2796805 |
| ZNF57       | NM_173480.1 | ZNF57        | 19         | Homo sapiens ZNF424         | 0.00739007 | 0.01577593 | 0.01577593 | 10.1249058 |
| SNCG        | NM_003087.1 | SNCG         | 10         | Homo sapiens BCSG1; SR      | 0.00071438 | 0.00254305 | 0.00254305 | 9.56569688 |
| CASP7       | NM_033338.4 | CASP7        | 10         | Homo sapiens ICE-LAP3; CM   | 0.02840052 | 0.04525097 | 0.04525097 | 9.49835655 |
| FAM20C      | NM_020223.1 | FAM20C       | 7          | Homo sapiens RNS; DMP4      | 6.82E-05   | 0.00044372 | 0.00044372 | 9.44844337 |
| LOC645249   | XM_928291.3 | LOC645249    |            | PREDICTED: Homo sapiens h   | 0.00887116 | 0.01824597 | 0.01824597 | 9.38560844 |
| FGFR1OP     | NM_007045.2 | FGFR1OP      | 6          | Homo sapiens FOP            | 0.00271663 | 0.00717133 | 0.00717133 | 9.3756674  |
| LOC440366   | XR_042154.1 | LOC440366    |            | PREDICTED: Homo sapiens n   | 0.01323821 | 0.02497792 | 0.02497792 | 9.26414598 |
| LOC10013251 | XM_00172519 | LOC100132510 |            | PREDICTED: Homo sapiens s   | 0.00556596 | 0.01256823 | 0.01256823 | 9.22075001 |
| LOC644150   | XM_933686.1 | LOC644150    |            | PREDICTED: Homo sapiens s   | 9.28E-07   | 2.19E-05   | 2.19E-05   | 9.15757682 |
| BEND3       | NM_00108045 | BEND3        | 6          | Homo sapiens RP11-59I9.2    | 0.00082429 | 0.002826   | 0.002826   | 8.94706886 |
| FAM164A     | NM_016010.1 | FAM164A      | 8          | Homo sapiens CGI-62         | 0.02132132 | 0.03628564 | 0.03628564 | 8.47003773 |
| HMGA2       | NM_00101588 | HMGA2        | 12         | Homo sapiens HMGI-C; HMG    | 0.00619522 | 0.01371834 | 0.01371834 | 8.35697149 |
| MGC35361    | XM_935566.1 | MGC35361     |            | Homo sapiens hypothetical p | 0.00453894 | 0.01072373 | 0.01072373 | 8.23774069 |
| LOC10013038 | XM_00171847 | LOC100130387 |            | PREDICTED: Homo sapiens s   | 0.00787728 | 0.01657828 | 0.01657828 | 8.16807492 |
|             | Hs.580154   | HS.580154    | 2          | UI-1-BB1p-aki-a-08-0-UI.s1  | 0.03017628 | 0.04729677 | 0.04729677 | 8.16291947 |
| BLID        | NM_00100178 | BLID         | 11         | Homo sapiens BRCC2; MGC1    | 0.01927742 | 0.03348362 | 0.03348362 | 8.15209978 |
| LOC653717   | XM_496034.2 | LOC653717    |            | PREDICTED: Homo sapiens s   | 0.01797967 | 0.03170069 | 0.03170069 | 8.03007459 |
| TMEM129     | NM_138385.2 | TMEM129      | 4          | Homo sapiens D4S2561E; FL   | 0.02713069 | 0.04367595 | 0.04367595 | 7.98473895 |
| MIR185      | NR_029706.1 | MIR185       |            | Homo sapiens microRNA 185   | 0.01072705 | 0.0212198  | 0.0212198  | 7.80694079 |
|             | Hs.569182   | HS.569182    | 12         | MGC9.6.1.1.F08.F.1 NIH_M    | 0.02334264 | 0.03892709 | 0.03892709 | 7.52383277 |
| NTN5        | NM_145807.1 | NTN5         | 19         | Homo sapiens netrin 5 (NTN  | 0.00998795 | 0.02008308 | 0.02008308 | 7.47654738 |
| HSH2D       | NM_032855.2 | HSH2D        | 19         | Homo sapiens HSH2; ALX; FI  | 0.0001054  | 0.00060034 | 0.00060034 | 7.25420714 |
| CAMK2D      | NM_172115.1 | CAMK2D       | 4          | Homo sapiens MGC44911; C    | 1.13E-06   | 2.49E-05   | 2.49E-05   | 6.9283904  |
| LOC10012934 | XM_00171873 | LOC10012934  |            | PREDICTED: Homo sapiens h   | 0.01999061 | 0.03443619 | 0.03443619 | 6.62244765 |
| LOC10013047 | XM_00172348 | LOC100130476 |            | PREDICTED: Homo sapiens s   | 0.02427123 | 0.04017359 | 0.04017359 | 6.61556432 |
| FBS1        | NM_022452.1 | FBS1         | 16         | Homo sapiens FLJ11618; FB   | 0.02373185 | 0.03944903 | 0.03944903 | 6.60934227 |
| FAM125B     | NM_00101170 | FAM125B      | 9          | Homo sapiens FLJ00001; C9   | 0.01399579 | 0.02609922 | 0.02609922 | 6.59093433 |

## 2.0 ACL-Dependent Upreg

|             |             |             |    |                           |                           |            |            |            |
|-------------|-------------|-------------|----|---------------------------|---------------------------|------------|------------|------------|
| C17orf106   | NM_00111332 | C17ORF106   | 17 | Homo sapiens              | MGC54300; FI              | 0.00248018 | 0.00667028 | 6.57325998 |
| BFSP1       | NM_001195.2 | BFSP1       | 20 | Homo sapiens              | FILENSIN; CP              | 0.0012178  | 0.0038407  | 6.55305598 |
| LOC652051   | XM_945171.1 | LOC652051   |    |                           | PREDICTED: Homo sapiens h | 0.01276002 | 0.02430778 | 6.41029174 |
| FCHSD2      | NM_014824.1 | FCHSD2      | 11 | Homo sapiens              | NWK; KIAA070              | 0.02779384 | 0.04453899 | 6.38008336 |
| GPR101      | NM_054021.1 | GPR101      |    |                           | Homo sapiens GPCR6        | 0.01636405 | 0.02951776 | 6.34123014 |
|             | Hs.149232   | HS.149232   |    |                           |                           |            |            |            |
| RNF217      | NM_152553.2 | RNF217      | 11 | wf30f02.x1                | Soares_NFL_T_G            | 0.03144723 | 0.0487753  | 6.33988433 |
| LIFR        | NM_002310.3 | LIFR        | 6  | Homo sapiens              | C6orf172; MG              | 0.00017809 | 0.00088136 | 6.14397224 |
| FLJ10996    | NM_019044.2 | FLJ10996    | 5  | Homo sapiens              | CD118; STWS               | 0.00064435 | 0.0023523  | 6.13891951 |
| TACR2       | NM_001057.1 | TACR2       | 2  | Homo sapiens              | MGC13033                  | 0.02630501 | 0.04272009 | 6.02456004 |
| DYNC2H1     | NM_00108046 | DYNC2H1     | 10 | Homo sapiens              | SKR; NKNAR;               | 0.01560128 | 0.02842016 | 6.00826965 |
| SNORA68     | NR_000012.1 | SNORA68     | 11 | Homo sapiens              | DYH1B; FLJ11              | 0.00266791 | 0.00706674 | 5.99230755 |
| KIAA1881    | Hs.567652   | KIAA1881    | 19 | Homo sapiens              | RNU68; U68                | 0.00689724 | 0.01495595 | 5.80718594 |
| MRM1        | NM_024864.3 | MRM1        |    |                           | PREDICTED: Homo sapiens k | 0.00274169 | 0.00722344 | 5.78865023 |
| CPNE7       | NM_153636.1 | CPNE7       | 17 | Homo sapiens              | FLJ22578                  | 0.01011618 | 0.02027341 | 5.64251691 |
| ZNF525      | XM_375646.3 | ZNF525      | 16 | Homo sapiens              | MGC34192                  | 7.66E-05   | 0.00048028 | 5.60797547 |
| HOXA2       | NM_006735.3 | HOXA2       | 19 | PREDICTED: Homo sapiens z |                           | 0.02521857 | 0.04134492 | 5.43983109 |
| FRYL        | XM_945291.1 | FRYL        | 7  | Homo sapiens              | HOX1K                     | 0.00062297 | 0.00229349 | 5.35919761 |
| SLIT2       | NM_004787.1 | SLIT2       | 4  | Homo sapiens              | FLJ16177; KIA             | 4.34E-05   | 0.00032559 | 5.31536336 |
| ZSCAN29     | NM_152455.2 | ZSCAN29     | 4  | Homo sapiens              | Slit-2; SLIL3;            | 0.00304422 | 0.00782326 | 5.28115604 |
|             | Hs.575095   | HS.575095   |    |                           |                           |            |            |            |
| FAM114A1    | NM_138389.1 | FAM114A1    | 15 | Homo sapiens              | MGC129895; I              | 0.00405424 | 0.00977623 | 5.16256804 |
| ALG10       | NM_032834.3 | ALG10       | 14 | Homo sapiens              | cDNA: FLJ214              | 0.02644085 | 0.04283828 | 5.09289934 |
| LOC728945   | XM_00172348 | LOC728945   | 4  | Homo sapiens              | Noxp20                    | 0.00202761 | 0.00570438 | 5.06515046 |
| PLCH1       | NM_014996.1 | PLCH1       | 12 | Homo sapiens              | FLJ14751; KCI             | 0.00384852 | 0.00941384 | 5.01670879 |
|             | Hs.190092   | HS.190092   |    |                           | PREDICTED: Homo sapiens s | 0.00679033 | 0.01478311 | 4.97607784 |
| LOC652183   | XM_941544.1 | LOC652183   | 3  | Homo sapiens              | DKFZp434C13               | 0.00971018 | 0.01962624 | 4.94788138 |
| SNORD60     | NR_002736.1 | SNORD60     | 1  | BX116001                  | Soares_testis_NH          | 0.02289217 | 0.03833468 | 4.91319941 |
| B3GNT5      | NM_032047.3 | B3GNT5      |    |                           | PREDICTED: Homo sapiens h | 0.00900886 | 0.01847326 | 4.86749556 |
|             | Hs.565633   | HS.565633   |    |                           |                           |            |            |            |
| KIAA1333    | NM_017769.2 | KIAA1333    | 16 | Homo sapiens              | RNU60; U60                | 0.00594765 | 0.0132729  | 4.86007356 |
| LOC653080   | XM_930884.1 | LOC653080   | 3  | Homo sapiens              | beta3Gn-T5; E             | 0.01998479 | 0.03444254 | 4.85219617 |
| MPZ         | NM_000530.3 | MPZ         |    |                           | UI-H-FH1-bfe-o-03-0-UI.s1 | 0.03221156 | 0.04976194 | 4.83877112 |
| LOC646123   | XM_933424.1 | LOC646123   | 14 | Homo sapiens              | G2E3; FLJ203              | 0.02242795 | 0.03772005 | 4.83833957 |
| OR2T6       | NM_00100547 | OR2T6       | 8  | PREDICTED: Homo sapiens s |                           | 0.00065526 | 0.00238093 | 4.81839893 |
|             | Hs.558271   | HS.558271   |    |                           |                           |            |            |            |
| SMCHD1      | XM_938891.1 | SMCHD1      | 1  | Homo sapiens              | CMT1B; CMT1               | 0.00208629 | 0.00582127 | 4.8179437  |
| ACOT8       | NM_183386.1 | ACOT8       | 22 | PREDICTED: Homo sapiens h |                           | 0.00010045 | 0.0005804  | 4.80119765 |
| LOC649639   | XM_943818.1 | LOC649639   | 1  | Homo sapiens              | OR2T9; OST7(              | 0.00082302 | 0.00282431 | 4.67931941 |
| KIAA0460    | NM_015203.2 | KIAA0460    | 6  | H.sapiens                 | mRNA for CD58 T           | 0.00945549 | 0.01921508 | 4.58612886 |
| LOC652185   | XM_941547.1 | LOC652185   | 18 | Homo sapiens              | KIAA0650; DK              | 0.02755151 | 0.04420934 | 4.55624556 |
| LOC387826   | XM_373521.3 | LOC387826   | 20 | Homo sapiens              | PTE1; hTE; HM             | 0.01590126 | 0.02883131 | 4.53330609 |
| ARFGEF2     | NM_006420.1 | ARFGEF2     |    |                           | PREDICTED: Homo sapiens h | 0.01485553 | 0.02735047 | 4.53109046 |
| LOC644144   | XM_927354.1 | LOC644144   | 1  | Homo sapiens              | FLJ32145; HS              | 0.00012651 | 0.00068235 | 4.52022706 |
|             | Hs.573047   | HS.573047   |    |                           | PREDICTED: Homo sapiens s | 0.00528329 | 0.01026727 | 4.43917533 |
|             | Hs.141748   | HS.141748   |    |                           |                           |            |            |            |
| MYADML      | NM_207329.1 | MYADML      | 12 | PREDICTED: Homo sapiens h |                           | 0.00494124 | 0.01147221 | 4.39670073 |
| DKFZp761E19 | NM_138368.2 | DKFZp761E19 | 20 | Homo sapiens              | FLJ23723; dJ1             | 0.00023393 | 0.00109365 | 4.37154166 |
| LOC642655   | XM_926114.1 | LOC642655   | 17 | PREDICTED: Homo sapiens s |                           | 0.01218678 | 0.02344591 | 4.35719715 |
| LOC152024   | XM_944430.1 | LOC152024   | 4  | BX110921                  | Soares_fetal_liver        | 0.01399029 | 0.02609345 | 4.35139589 |
|             | Hs.49181    | HS.49181    |    |                           |                           |            |            |            |
| LOC643534   | XM_936822.2 | LOC643534   | 10 | BX105574                  | Soares_fetal_liver        | 0.00540737 | 0.0122713  | 4.33068114 |
| LOC643772   | XM_927061.1 | LOC643772   | 2  | Homo sapiens              | myeloid-assoc             | 0.02744431 | 0.04407636 | 4.32921387 |
| DGKG        | NM_001346.1 | DGKG        | 11 | Homo sapiens              | PP1030                    | 0.01801155 | 0.0317363  | 4.32571221 |
| NMNAT3      | NM_178177.2 | NMNAT3      | 3  | PREDICTED: Homo sapiens s |                           | 0.02693398 | 0.04343649 | 4.30634561 |
| ERLIN2      | NM_00100379 | ERLIN2      |    |                           | PREDICTED: Homo sapiens n | 0.0241181  | 0.03997492 | 4.28338597 |
| LEFTY2      | NM_003240.2 | LEFTY2      | 7  | tn48d04.x1                | NCI_CGAP_Kid11            | 0.02923787 | 0.04622594 | 4.25016173 |
| TRAF3       | NM_003300.2 | TRAF3       |    |                           | PREDICTED: Homo sapiens s | 0.00513835 | 0.01181625 | 4.22449423 |
| PAR6B       | NM_032521.1 | PAR6B       | 9  | PREDICTED: Homo sapiens s |                           | 0.00264213 | 0.00701898 | 4.17069865 |
|             | Hs.538300   | HS.538300   |    |                           |                           |            |            |            |
| CDK8        | NM_001260.1 | CDK8        | 3  | Homo sapiens              | DGK-GAMMA;                | 0.00529657 | 0.01208294 | 4.16418059 |
| LOC729985   | XM_929793.1 | LOC729985   | 3  | Homo sapiens              | PNAT-3; PNAT              | 0.009616   | 0.01947571 | 4.15587899 |
| LOC647805   | XM_943032.1 | LOC647805   | 8  | Homo sapiens              | C8orf2; MGC8              | 0.02011644 | 0.03460907 | 4.14120134 |
|             | Hs.543981   | HS.543981   |    |                           |                           |            |            |            |
| GLYCTK      | NM_145262.2 | GLYCTK      | 1  | Homo sapiens              | LEFTA; TGFB4              | 0.02170751 | 0.03675867 | 4.13734206 |
|             | Hs.131087   | HS.131087   |    |                           |                           |            |            |            |
| PLA2G15     | NM_012320.3 | PLA2G15     | 14 | Homo sapiens              | CD40bp; CAP               | 7.82E-05   | 0.00048842 | 4.09916719 |
|             | Hs.254752   | HS.254752   |    |                           |                           |            |            |            |
| LOC642367   | XR_038808.1 | LOC642367   | 20 | Homo sapiens              | PAR6B                     | 0.00436932 | 0.01038166 | 4.09446045 |
| LOC10013359 | XM_00172169 | LOC10013359 | 10 | hi90e01.x1                | Soares_NFL_T_G            | 0.00203957 | 0.00573063 | 4.08880083 |
|             |             |             |    |                           |                           |            |            |            |
|             |             |             | 13 | Homo sapiens              | K35; MGC126               | 0.01774697 | 0.03135144 | 4.08799595 |
|             |             |             | 2  | PREDICTED: Homo sapiens s |                           | 0.01741244 | 0.03089606 | 4.07605543 |
|             |             |             |    |                           | PREDICTED: Homo sapiens h | 0.01684457 | 0.03015927 | 4.03639693 |
|             |             |             | 5  | nk37c05.s1                | NCI_CGAP_GC2              | 0.00725466 | 0.01553263 | 4.01667    |
|             |             |             | 3  | Homo sapiens              | HBeAgBP4A; t              | 0.01565669 | 0.02850677 | 3.9877064  |
|             |             |             | 3  | BX111162                  | Soares_testis_NH          | 0.01634831 | 0.02949917 | 3.96577053 |
|             |             |             | 16 | Homo sapiens              | DKFZp564A01               | 0.00038579 | 0.0015798  | 3.9435196  |
|             |             |             | 3  | xv32c11.x1                | Soares_NFL_T_C            | 0.00118819 | 0.00377028 | 3.93982273 |
|             |             |             |    |                           | PREDICTED: Homo sapiens n | 0.02898728 | 0.04596349 | 3.93922817 |
|             |             |             |    |                           | PREDICTED: Homo sapiens h | 0.01480368 | 0.02727813 | 3.90883715 |

## 2.0 ACL-Dependent Upreg

|             |             |             |    |                           |                      |            |            |            |
|-------------|-------------|-------------|----|---------------------------|----------------------|------------|------------|------------|
| NFRKB       | NM_006165.2 | NFRKB       | 11 | Homo sapiens              | DKFZp547B20          | 0.01646381 | 0.0296485  | 3.90638421 |
| MSI2        | NM_170721.1 | MSI2        | 17 | Homo sapiens              | FLJ36569; MS         | 0.00242518 | 0.00655805 | 3.87432132 |
| MPV17L2     | NM_032683.1 | MPV17L2     | 19 | Homo sapiens              | MGC110861; I         | 0.00306155 | 0.00786038 | 3.83411529 |
| NASP        | NM_172164.1 | NASP        | 1  | Homo sapiens              | MGC20372; M          | 2.75E-05   | 0.00023469 | 3.82867332 |
| ABCF3       | NM_018358.1 | ABCF3       | 3  | Homo sapiens              | EST201864; F         | 0.00159433 | 0.00475761 | 3.82339276 |
| SNORA72     | NR_002581.1 | SNORA72     | 8  | Homo sapiens              | RNU72; U72           | 0.00303697 | 0.00781757 | 3.82155553 |
| SPAG1       | NM_172218.1 | SPAG1       | 8  | Homo sapiens              | HSD-3.8; TPI         | 0.00105179 | 0.00342549 | 3.814681   |
| APOLD1      | NM_030817.1 | APOLD1      | 12 | Homo sapiens              | VERGE; DKFZ          | 0.00054471 | 0.00206339 | 3.81189575 |
| ZNF563      | NM_145276.1 | ZNF563      | 19 | Homo sapiens              | FLJ34797             | 0.00945655 | 0.01921364 | 3.80094031 |
| FANCA       | NM_000135.2 | FANCA       | 16 | Homo sapiens              | FAA; FA; FA1;        | 0.01650161 | 0.02970673 | 3.73963347 |
| NRIP3       | NM_020645.1 | NRIP3       | 11 | Homo sapiens              | NY-SAR-105; C        | 0.00641427 | 0.01408858 | 3.72085462 |
|             | Hs.526528   | HS.526528   | 16 | q08e04.x1                 | Soares_NhHMPu        | 0.01003338 | 0.02013716 | 3.71311228 |
| MMP23B      | NM_006983.1 | MMP23B      | 1  | Homo sapiens              | MIFR-1; MIFR;        | 0.01171389 | 0.02274956 | 3.69908137 |
| LOC645015   | XM_928077.1 | LOC645015   | 11 | PREDICTED: Homo sapiens   | s                    | 0.01099613 | 0.02165355 | 3.67920442 |
| VPREB3      | NM_013378.1 | VPREB3      | 22 | Homo sapiens              | 8HS20; N27C;         | 0.00299153 | 0.00772806 | 3.67447362 |
| ZNF670      | NM_033213.2 | ZNF670      | 1  | Homo sapiens              | FLJ12606; MG         | 0.02261837 | 0.03795806 | 3.66819998 |
| GPER        | NM_001505.1 | GPER        | 7  | Homo sapiens              | LyGPR; DRY12         | 0.0052263  | 0.01197038 | 3.6391281  |
| LOC143188   | NM_00102544 | LOC143188   | 10 | PREDICTED: Homo sapiens   | h                    | 0.0005249  | 0.00200232 | 3.63791621 |
| MGC11082    | XR_079560.1 | MGC11082    |    | PREDICTED: Homo sapiens   | h                    | 0.00415467 | 0.00997195 | 3.63534877 |
|             | Hs.47702    | HS.47702    | 5  | BX111257                  | Soares fetal liver : | 0.0320988  | 0.04961594 | 3.62881826 |
| C14orf147   | NM_138288.2 | C14ORF147   | 14 | Homo sapiens              | MGC24447             | 2.12E-05   | 0.00019455 | 3.61296147 |
| LOC649136   | XM_943597.1 | LOC649136   |    | PREDICTED: Homo sapiens   | h                    | 0.01582888 | 0.02872405 | 3.61018578 |
|             | Hs.549914   | HS.549914   |    | xd29a02.x1                | NCI_CGAP_Ov2:        | 0.01381367 | 0.02582607 | 3.58840165 |
| LOC653127   | XM_931760.1 | LOC653127   | 17 | PREDICTED: Homo sapiens   | s                    | 0.00174426 | 0.00510273 | 3.58388574 |
| EZH1        | NM_001991.2 | EZH1        | 17 | Homo sapiens              | KIAA0388             | 0.01396208 | 0.02605871 | 3.54478807 |
| LOC440421   | XM_934895.1 | LOC440421   | 17 | PREDICTED: Homo sapiens   | s                    | 0.02550151 | 0.04172694 | 3.53225371 |
| LOC145814   | XM_927974.1 | LOC145814   | 15 | PREDICTED: Homo sapiens   | h                    | 0.02324897 | 0.03880065 | 3.52636382 |
|             | Hs.575696   | HS.575696   |    | HESC3_16_C05.g1_A036      | Hu                   | 0.00773713 | 0.01635937 | 3.51543851 |
| LOC10013303 | XR_038070.1 | LOC10013303 | 9  | PREDICTED: Homo sapiens   | n                    | 0.01312813 | 0.02482194 | 3.50502585 |
| LOC642267   | XM_930705.1 | LOC642267   | 11 | PREDICTED: Homo sapiens   | s                    | 0.00293727 | 0.00762414 | 3.50199625 |
| LOC642946   | XM_931870.1 | LOC642946   | 1  | PREDICTED: Homo sapiens   | h                    | 0.00042623 | 0.00170995 | 3.50147125 |
|             | Hs.559766   | HS.559766   | 1  | UI-E-EJ0-ahv-o-12-0-UI.s2 | U                    | 0.02096931 | 0.03577621 | 3.49521811 |
|             | Hs.211930   | HS.211930   |    | PREDICTED: Homo sapiens   | h                    | 0.00932704 | 0.01900023 | 3.49009672 |
| LOC652684   | XM_942287.1 | LOC652684   |    | PREDICTED: Homo sapiens   | s                    | 0.0198617  | 0.03428478 | 3.47497788 |
| DDX60       | NM_017631.3 | DDX60       | 4  | Homo sapiens              | FLJ20035; FLJ        | 0.0178476  | 0.03149337 | 3.42205812 |
| GUCY1B2     | NM_004129.2 | GUCY1B2     | 13 | Homo sapiens              | GC-SB2               | 0.02176435 | 0.03683197 | 3.37506083 |
| NSD1        | NM_022455.3 | NSD1        | 5  | Homo sapiens              | MGC12997; NSD1       | 0.00038628 | 0.00158122 | 3.36332427 |
|             | Hs.570966   | HS.570966   | 5  | 602424629F1               | NIH_MGC_14           | 1.15E-05   | 0.00012147 | 3.31357554 |
| CTRL        | NM_001907.1 | CTRL        | 16 | Homo sapiens              | CTRL1; MGC70         | 2.27E-05   | 0.00020389 | 3.31286207 |
|             | Hs.565987   | HS.565987   | 3  | UI-H-EI1-aza-j-19-0-UI.s1 | N                    | 0.00937376 | 0.01907039 | 3.30010584 |
| C1orf203    | NR_024125.1 | C1ORF203    | 3  | Homo sapiens              | chromosome 1         | 0.00913502 | 0.01866856 | 3.29773463 |
|             | Hs.579870   | HS.579870   | 19 | QV4-OT0035-090300-133-h1  |                      | 0.01346146 | 0.02532441 | 3.28614165 |
| OR2Y1       | NM_00100165 | OR2Y1       | 5  | Homo sapiens              | OR5-2                | 0.00816922 | 0.0170934  | 3.27083718 |
|             | Hs.282470   | HS.282470   |    | AV651250                  | GLC Homo sapiens     | 0.01999191 | 0.03443298 | 3.27019237 |
| LRIG1       | NM_015541.2 | LRIG1       | 3  | Homo sapiens              | LIG-1; LIG1; I       | 0.00073981 | 0.00261133 | 3.27018977 |
| REP15       | NM_00102987 | REP15       | 12 | Homo sapiens              | RAB15 effecto        | 0.0105419  | 0.02092974 | 3.229586   |
| LOC650062   | XM_939151.1 | LOC650062   |    | PREDICTED: Homo sapiens   | s                    | 0.00748468 | 0.01593407 | 3.19253754 |
| LOC643432   | XM_932844.1 | LOC643432   | 6  | PREDICTED: Homo sapiens   | h                    | 0.00859087 | 0.01777714 | 3.1910758  |
| LRRC8C      | NM_032270.2 | LRRC8C      | 1  | Homo sapiens              | AD158; FAD15         | 0.00359868 | 0.00893137 | 3.18693013 |
| SNORA5C     | NR_002991.1 | SNORA5C     | 7  | Homo sapiens              | ACA5c                | 0.03136709 | 0.04868574 | 3.16825917 |
| LOC10013189 | XM_00172286 | LOC10013189 |    | PREDICTED: Homo sapiens   | h                    | 0.00159586 | 0.00476087 | 3.16083155 |
| TRAF3IP1    | NM_015650.2 | TRAF3IP1    | 2  | Homo sapiens              | MIP-T3; DKFZ         | 0.00078777 | 0.00272832 | 3.15403776 |
| LOC10013280 | XR_039272.1 | LOC10013280 |    | PREDICTED: Homo sapiens   | n                    | 0.01508783 | 0.02767503 | 3.15134207 |
| LOC10012990 | XM_00172603 | LOC10012990 | 6  | PREDICTED: Homo sapiens   | h                    | 0.01905657 | 0.0331424  | 3.14592425 |
| HAUS5       | NM_015302.1 | HAUS5       | 19 | Homo sapiens              | HAUS augmin-         | 0.00851996 | 0.01765732 | 3.14212902 |
| TMEM150B    | XM_209187.5 | TMEM150B    | 19 | Homo sapiens              | transmembrar         | 0.00515481 | 0.01184158 | 3.13954391 |
| LOC732172   | Hs.515479   | LOC732172   |    | PREDICTED: Homo sapiens   | h                    | 0.01851227 | 0.03238754 | 3.13371849 |
| TIGD2       | NM_145715.1 | TIGD2       | 4  | Homo sapiens              | DKFZp667D13          | 0.01079839 | 0.02133761 | 3.13040174 |
| LOC644632   | XM_00171499 | LOC644632   | 9  | PREDICTED: Homo sapiens   | s                    | 0.00389918 | 0.00950781 | 3.12452515 |
|             | Hs.544713   | HS.544713   | 6  | zt62c04.s1                | Soares_testis_NH     | 0.02511266 | 0.04119613 | 3.11133937 |
| LOC643342   | XR_016301.2 | LOC643342   | 9  | PREDICTED: Homo sapiens   | n                    | 0.00621742 | 0.0137479  | 3.09741352 |
| UCN         | NM_003353.2 | UCN         | 2  | Homo sapiens              | MGC129974; I         | 0.00488063 | 0.01137522 | 3.09278804 |
| MORN4       | NM_178832.2 | MORN4       | 10 | Homo sapiens              | bA548K23.4; I        | 0.00536728 | 0.01221349 | 3.06626257 |
| BCL2A1      | NM_004049.2 | BCL2A1      | 15 | Homo sapiens              | GRS; ACC-1; I        | 0.03186964 | 0.0493038  | 3.05704455 |
| KLK10       | NM_145888.1 | KLK10       | 19 | Homo sapiens              | NES1; PRSSL1         | 0.02337192 | 0.03896396 | 3.05192046 |
| LOC653060   | XM_925779.1 | LOC653060   | 9  | PREDICTED: Homo sapiens   | s                    | 0.00797873 | 0.01674316 | 3.04362216 |
| NPAL3       | NM_020448.2 | NPAL3       | 1  | Homo sapiens              | RP3-462023.3         | 1.81E-06   | 3.45E-05   | 3.03800288 |
| LOC649765   | XM_938835.1 | LOC649765   |    | PREDICTED: Homo sapiens   | s                    | 0.00137654 | 0.00423442 | 3.03037322 |
|             | Hs.550193   | HS.550193   | 5  | Human unidentified        | mRNA, p              | 0.00046754 | 0.00183107 | 3.02809482 |
| LOC648283   | XR_038536.1 | LOC648283   |    | PREDICTED: Homo sapiens   | n                    | 0.03001879 | 0.04714512 | 3.01256329 |

## 2.0 ACL-Dependent Upreg

|             |             |             |    |                           |                  |            |            |            |
|-------------|-------------|-------------|----|---------------------------|------------------|------------|------------|------------|
| BBS7        | NM_018190.2 | BBS7        | 4  | Homo sapiens              | FLJ10715; BB     | 0.00076108 | 0.00265963 | 2.99989269 |
| FAM75B      | NM_00109880 | FAM75B      | 9  | Homo sapiens              | C9orf36B; bA     | 0.02965782 | 0.04669967 | 2.97634139 |
| FRZB        | NM_001463.2 | FRZB        | 2  | Homo sapiens              | FRZB-1; FRZB     | 0.00628943 | 0.01386762 | 2.96751005 |
| HDAC7       | NM_00109841 | HDAC7       | 12 | Homo sapiens              | DKFZP586J09      | 0.0149432  | 0.02747465 | 2.96106029 |
| FLJ27365    | NM_207477.1 | FLJ27365    | 22 | Homo sapiens              | FLJ27365 prot    | 0.02141652 | 0.0363793  | 2.95325953 |
| L3MBTL4     | NM_173464.1 | L3MBTL4     |    | Homo sapiens              | HsT1031          | 0.02636408 | 0.04277128 | 2.94295393 |
| INPP5A      | XM_936595.1 | INPP5A      |    | PREDICTED: Homo sapiens   | ir               | 0.01678386 | 0.03010514 | 2.94176438 |
| RBMV2FP     | NR_002193.1 | RBMV2FP     |    | Homo sapiens              | MGC26641         | 0.0303487  | 0.04950536 | 2.94014777 |
| TINAG       | NM_014464.2 | TINAG       | 6  | Homo sapiens              | TIN1; TIN-AG;    | 0.00681095 | 0.01481911 | 2.92018459 |
| SNORD53     | NR_002741.1 | SNORD53     | 2  | Homo sapiens              | RNU53; U53       | 0.00260617 | 0.00693872 | 2.91025097 |
| TAS2R49     | NM_176889.1 | TAS2R49     |    | Homo sapiens              | MGC119118; I     | 0.0084823  | 0.01759267 | 2.89862969 |
| LOC644781   | XM_496584.2 | LOC644781   | 9  | PREDICTED: Homo sapiens   | s                | 0.03160718 | 0.04897445 | 2.89309816 |
| LOC652353   | XM_941781.1 | LOC652353   |    | PREDICTED: Homo sapiens   | s                | 0.00037118 | 0.00153385 | 2.88488682 |
| LOC648665   | XR_042388.1 | LOC648665   |    | PREDICTED: Homo sapiens   | n                | 0.00982333 | 0.01980703 | 2.8765322  |
|             | Hs.130590   | Hs.130590   |    | BX105859                  | Soares_testis_NH | 0.00367265 | 0.00908797 | 2.86960573 |
| DCDC1       | NM_181807.1 | DCDC1       | 11 | Homo sapiens              | doublecortin d   | 0.03195273 | 0.04942532 | 2.84898083 |
|             | Hs.561633   | Hs.561633   |    | UI-E-EJ0-ahn-g-14-0-UI.s1 | L                | 0.00399275 | 0.00966871 | 2.8434246  |
| LOC641823   | XM_935705.1 | LOC641823   |    | PREDICTED: Homo sapiens   | s                | 0.02023565 | 0.03476464 | 2.84247027 |
|             | Hs.170534   | Hs.170534   |    | BX094716                  | NCI_CGAP_Kid11   | 0.00315612 | 0.00805937 | 2.84040957 |
| LOC390531   | XM_496025.2 | LOC390531   | 15 | PREDICTED: Homo sapiens   | s                | 0.01324094 | 0.02497875 | 2.81946855 |
| C1orf124    | NM_032018.4 | C1ORF124    | 1  | Homo sapiens              | DKFZP547N04      | 0.00702969 | 0.01515846 | 2.81906119 |
| LOC650823   | XM_939912.1 | LOC650823   |    | PREDICTED: Homo sapiens   | h                | 0.00076008 | 0.00265956 | 2.81468342 |
| LOC653194   | XM_926449.1 | LOC653194   | 6  | PREDICTED: Homo sapiens   | s                | 0.01055822 | 0.02094684 | 2.81060011 |
| DNAJC30     | NM_032317.2 | DNAJC30     | 7  | Homo sapiens              | MGC12943         | 0.00605628 | 0.01347382 | 2.79969013 |
| LOC10019093 | NR_024458.1 | LOC10019093 | 13 | Homo sapiens              | hypothetical L   | 0.00692279 | 0.01498743 | 2.79573134 |
| LBX2        | NM_00100981 | LBX2        | 2  | Homo sapiens              | LP3727           | 0.01766096 | 0.03124013 | 2.78802406 |
| TSPAN1      | NM_005727.2 | TSPAN1      | 1  | Homo sapiens              | NET-1; 90304     | 0.00820678 | 0.01714887 | 2.78426557 |
| LOC646825   | XM_929783.1 | LOC646825   | 19 | PREDICTED: Homo sapiens   | s                | 0.00302433 | 0.00779427 | 2.77503038 |
| LOC649853   | XM_941281.1 | LOC649853   |    | PREDICTED: Homo sapiens   | s                | 0.02673258 | 0.04318859 | 2.7641932  |
| LOC643397   | XM_938878.1 | LOC643397   | 2  | PREDICTED: Homo sapiens   | s                | 0.01383495 | 0.02585695 | 2.76375599 |
| PROK2       | NM_021935.2 | PROK2       | 3  | Homo sapiens              | PK2; BV8; MI     | 0.00988977 | 0.01991884 | 2.74731952 |
| RFXDC2      | NM_022841.2 | RFXDC2      |    | Homo sapiens              | MGC131836; I     | 0.002272   | 0.00621654 | 2.73203978 |
|             | Hs.555595   | Hs.555595   |    | Human (clone xip8)        | mRNA se          | 0.01982771 | 0.03424242 | 2.73196304 |
| FAM90A16    | XM_496952.4 | FAM90A16    | 8  | PREDICTED: Homo sapiens   | fi               | 0.01732998 | 0.03078493 | 2.72893953 |
| LOC647904   | XM_936965.1 | LOC647904   |    | PREDICTED: Homo sapiens   | s                | 0.02804676 | 0.04484511 | 2.72342605 |
|             | Hs.583098   | Hs.583098   |    | DB305811                  | BRAWH3 Homo se   | 0.03058597 | 0.04782165 | 2.72171259 |
| ZNF124      | NM_003431.2 | ZNF124      | 1  | Homo sapiens              | MGC117046; I     | 0.02144306 | 0.0364073  | 2.72101895 |
| LOC645487   | XM_932932.1 | LOC645487   | 20 | PREDICTED: Homo sapiens   | h                | 0.00260866 | 0.00694364 | 2.71686947 |
| LOC648153   | XM_937206.1 | LOC648153   |    | PREDICTED: Homo sapiens   | s                | 0.00396394 | 0.00962683 | 2.70807587 |
| TMEM70      | NM_017866.3 | TMEM70      | 8  | Homo sapiens              | FLJ20533         | 0.00232243 | 0.00633061 | 2.70434087 |
| GABRG2      | NM_198904.1 | GABRG2      | 5  | Homo sapiens              | ECA2; GEFSP      | 0.00092385 | 0.00309315 | 2.68520989 |
| LOC651371   | XM_944620.1 | LOC651371   |    | PREDICTED: Homo sapiens   | h                | 0.02142888 | 0.03638892 | 2.67142336 |
|             | Hs.581554   | Hs.581554   |    | DB114688                  | THYMU2 Homo sa   | 0.01021042 | 0.02040957 | 2.66886238 |
|             | Hs.539123   | Hs.539123   |    | zu74b05.s1                | Soares_testis_NI | 0.00421899 | 0.01009067 | 2.66168203 |
| LOC731444   | XM_925913.1 | LOC731444   |    | PREDICTED: Homo sapiens   | s                | 0.00983826 | 0.01982978 | 2.65637017 |
| ZNF502      | NM_033210.3 | ZNF502      | 3  | Homo sapiens              | FLJ14855; FLJ    | 0.01259764 | 0.02407018 | 2.64306672 |
| LOC642761   | XM_926183.1 | LOC642761   | 16 | PREDICTED: Homo sapiens   | h                | 0.02023647 | 0.03476054 | 2.63526272 |
| ALB         | NM_000477.3 | ALB         | 4  | Homo sapiens              | PRO1341; DK      | 0.01538004 | 0.02811138 | 2.61818047 |
| GMIP        | NM_016573.1 | GMIP        | 19 | Homo sapiens              | GEM interacti    | 0.01496863 | 0.02751211 | 2.61176325 |
| LOC10013355 | XR_038272.1 | LOC10013355 |    | PREDICTED: Homo sapiens   | n                | 0.02742788 | 0.04405648 | 2.60231155 |
| LOC646706   | XM_929652.1 | LOC646706   | 19 | PREDICTED: Homo sapiens   | s                | 0.01267497 | 0.02417968 | 2.58848658 |
| SNX1        | NM_003099.3 | SNX1        | 15 | Homo sapiens              | SNX1A; Vps5;     | 7.86E-05   | 0.00048926 | 2.57296311 |
| LOC642369   | XM_925901.1 | LOC642369   | 11 | PREDICTED: Homo sapiens   | h                | 0.02955378 | 0.04660339 | 2.57057111 |
|             | Hs.523235   | Hs.523235   |    | nq82a06.s1                | NCI_CGAP_Co9     | 0.03124978 | 0.04855219 | 2.56184343 |
| LOC643121   | XM_926493.1 | LOC643121   | 9  | PREDICTED: Homo sapiens   | h                | 0.00720891 | 0.01545904 | 2.55345176 |
|             | Hs.571950   | Hs.571950   |    | ym35h10.s1                | Soares infant br | 0.02068838 | 0.03538023 | 2.54259913 |
| LOC653392   | XM_929544.1 | LOC653392   | 7  | PREDICTED: Homo sapiens   | s                | 0.01865751 | 0.03259441 | 2.53653487 |
|             | Hs.579715   | Hs.579715   |    | DA717721                  | NT2RI2 Homo sa   | 0.01559589 | 0.02841512 | 2.53638848 |
| FUZ         | NM_025129.3 | FUZ         | 19 | Homo sapiens              | FLJ22688; FY     | 0.0201429  | 0.03463814 | 2.52664769 |
|             | Hs.562197   | Hs.562197   |    | 602137688F1               | NIH_MGC_83       | 0.02943518 | 0.04646355 | 2.52109665 |
| LOC729858   | XR_037908.1 | LOC729858   |    | PREDICTED: Homo sapiens   | n                | 0.00198619 | 0.00561257 | 2.51710664 |
| SMARCD3     | NM_003078.3 | SMARCD3     | 7  | Homo sapiens              | Rsc6p; BAF60     | 0.00134363 | 0.004152   | 2.51522691 |
| CIZ1        | NM_012127.2 | CIZ1        | 9  | Homo sapiens              | LSFR1; ZNF35     | 0.0150075  | 0.02757422 | 2.50467042 |
| LOC650796   | XM_939881.1 | LOC650796   |    | PREDICTED: Homo sapiens   | h                | 0.02721239 | 0.04376858 | 2.50403596 |
| LOC643896   | NM_00110138 | LOC643896   | 2  | Homo sapiens              | similar to cAM   | 0.00392408 | 0.00955781 | 2.49830475 |
| MIR25       | NR_029498.1 | MIR25       |    | Homo sapiens              | microRNA 25 (    | 0.01945444 | 0.03371566 | 2.4833448  |
| INHBE       | NM_031479.3 | INHBE       | 12 | Homo sapiens              | MGC4638          | 0.01318144 | 0.02490107 | 2.47949634 |
| SCG5        | NM_003020.1 | SCG5        | 15 | Homo sapiens              | SgV; 7B2; P7E    | 0.01472589 | 0.02717164 | 2.47597686 |
| FIGNL1      | NM_00104276 | FIGNL1      | 7  | Homo sapiens              | fidgetin-like 1  | 1.70E-06   | 3.33E-05   | 2.4728347  |
| LOC647246   | XM_930292.1 | LOC647246   | 1  | PREDICTED: Homo sapiens   | s                | 0.03095773 | 0.04822254 | 2.45705324 |

## 2.0 ACL-Dependent Upreg

|             |             |             |    |                             |            |            |            |
|-------------|-------------|-------------|----|-----------------------------|------------|------------|------------|
| CLVS2       | NM_00101085 | CLVS2       | 6  | Homo sapiens C6orf213; C6c  | 0.00785618 | 0.0165499  | 2.44862752 |
| LOC645349   | XM_928390.1 | LOC645349   | 1  | PREDICTED: Homo sapiens h   | 0.0013118  | 0.00407333 | 2.44645901 |
|             | Hs.580480   | Hs.580480   | 2  | DA584132 HLUNG2 Homo sa     | 0.00623222 | 0.01377782 | 2.44340985 |
| TINAGL1     | NM_022164.1 | TINAGL1     | 1  | Homo sapiens LIECG3; LCN7   | 0.02431655 | 0.04021797 | 2.44297112 |
| DAPK3       | NM_001348.1 | DAPK3       | 19 | Homo sapiens FLJ36473; ZIF  | 0.00020935 | 0.00099704 | 2.44075272 |
| KIR2DL1     | NM_014218.1 | KIR2DL1     | 19 | Homo sapiens KIR-K65; CL-4  | 0.00753443 | 0.01602117 | 2.43843473 |
| LOC653879   | XM_936226.1 | LOC653879   |    | PREDICTED: Homo sapiens s   | 0.02153308 | 0.03654302 | 2.4311844  |
| LOC554207   | XR_040106.1 | LOC554207   |    | PREDICTED: Homo sapiens h   | 0.0128051  | 0.02438083 | 2.42391283 |
|             | Hs.541100   | Hs.541100   | 18 | ov43g05.x1 Soares_testis_Nl | 0.03148709 | 0.0488023  | 2.41967186 |
| KRTDAP      | NM_207392.1 | KRTDAP      | 19 | Homo sapiens MGC163373; l   | 2.78E-05   | 0.00023646 | 2.41011239 |
|             | Hs.307606   | Hs.307606   | 5  | BX094636 Soares_NFL_T_GE    | 0.01903609 | 0.0331386  | 2.40931577 |
| BATF3       | NM_018664.1 | BATF3       | 1  | Homo sapiens JUNDM1; SNF    | 0.01763372 | 0.03120209 | 2.40160722 |
| SLC22A15    | NM_018420.1 | SLC22A15    | 1  | Homo sapiens FLIPT1; DKFZl  | 0.02030867 | 0.03485702 | 2.40011132 |
| SEMA4A      | NM_022367.2 | SEMA4A      | 1  | Homo sapiens RP11-54H19.2   | 0.0032727  | 0.00827349 | 2.400043   |
|             | Hs.478682   | Hs.478682   | 3  | Homo sapiens cDNA FLJ3109   | 0.00209593 | 0.00584066 | 2.39555363 |
| KLF10       | NM_005655.1 | KLF10       | 8  | Homo sapiens TIEG; EGRA; l  | 0.00693778 | 0.0150109  | 2.39264487 |
| CECR6       | NM_031890.2 | CECR6       | 22 | Homo sapiens cat eye syndrc | 0.00121139 | 0.00382603 | 2.39126784 |
| SALL4       | NM_020436.2 | SALL4       | 20 | Homo sapiens MGC133050; l   | 0.00133655 | 0.00413481 | 2.39115368 |
|             | Hs.362932   | Hs.362932   | 5  | Homo sapiens cDNA FLJ2503   | 0.00696699 | 0.01505014 | 2.38200362 |
| LOC10012907 | XM_00172099 | LOC10012907 |    | PREDICTED: Homo sapiens s   | 0.00692479 | 0.01498878 | 2.37401641 |
| LOC647836   | XM_936893.1 | LOC647836   |    | PREDICTED: Homo sapiens s   | 0.03004808 | 0.04717066 | 2.37019478 |
| CXCL17      | NM_198477.1 | CXCL17      | 19 | Homo sapiens UNQ473; VCC    | 0.03203656 | 0.04953384 | 2.35754354 |
| KRT18P44    | XM_00172046 | KRT18P44    |    | PREDICTED: Homo sapiens k   | 0.00170182 | 0.00500416 | 2.35565737 |
| LOC642515   | XM_926011.1 | LOC642515   | 9  | PREDICTED: Homo sapiens s   | 0.02981617 | 0.04688787 | 2.34844861 |
|             | Hs.22347    | Hs.22347    |    | PREDICTED: Homo sapiens h   | 0.02941389 | 0.04645693 | 2.3417627  |
| TTY5        | NR_001541.1 | TTY5        |    | Homo sapiens TTY5           | 0.00248359 | 0.0066745  | 2.33734837 |
|             | Hs.550118   | Hs.550118   | 1  | oy41f08.s1 Soares_parathyr  | 0.01190502 | 0.02304252 | 2.33659509 |
| NMT2        | NM_004808.2 | NMT2        | 10 | Homo sapiens N-myristoyltra | 0.02405178 | 0.03988323 | 2.33567714 |
|             | Hs.553290   | Hs.553290   |    | HESC3_84_D06.g1_A036 Hu     | 0.01678784 | 0.0301073  | 2.32551405 |
| XK          | NM_021083.2 | XK          |    | Homo sapiens XKR1; KX; Xl   | 0.00975558 | 0.01969235 | 2.32275888 |
| LOC401778   | XM_377343.3 | LOC401778   | 14 | PREDICTED: Homo sapiens s   | 0.02339946 | 0.03899791 | 2.32085121 |
| FLJ44290    | NM_198564.1 | FLJ44290    | 3  | Homo sapiens FLJ44290 prot  | 0.01669511 | 0.02999049 | 2.3177619  |
| ZNF586      | NM_017652.2 | ZNF586      | 19 | Homo sapiens FLJ20070       | 0.02837844 | 0.04523568 | 2.31615143 |
|             | Hs.538979   | Hs.538979   | 11 | Homo sapiens RAG1 mRNA, t   | 0.02256648 | 0.03788268 | 2.31046199 |
| NOD1        | NM_006092.1 | NOD1        | 7  | Homo sapiens NLRC1; CARD    | 0.00288722 | 0.00752657 | 2.29560996 |
| PTPRE       | NM_130435.2 | PTPRE       | 10 | Homo sapiens DKFZp313F13    | 0.01083729 | 0.02139504 | 2.28556539 |
| GRRP1       | NM_024869.1 | GRRP1       | 1  | Homo sapiens RP11-96L14.5   | 0.02059193 | 0.03524301 | 2.27214391 |
|             | Hs.142570   | Hs.142570   | 3  | Homo sapiens clone 24629 nr | 0.01208514 | 0.02329159 | 2.26383239 |
| LOC10012897 | XR_037834.1 | LOC10012897 |    | PREDICTED: Homo sapiens n   | 0.00301579 | 0.00777963 | 2.2562146  |
|             | Hs.158036   | Hs.158036   | 5  | BX118491 NCI_CGAP_Brn23     | 0.01351667 | 0.0254063  | 2.25522897 |
| LOC651617   | XM_940799.1 | LOC651617   |    | PREDICTED: Homo sapiens s   | 0.00971445 | 0.01962755 | 2.25487258 |
|             | Hs.558286   | Hs.558286   | 9  | AV730797 HTF Homo sapiens   | 0.0153081  | 0.02800344 | 2.2450642  |
| CYorf15A    | NM_00100585 | CYORF15A    |    | Homo sapiens MGC131732; l   | 0.00244532 | 0.00660103 | 2.2377583  |
| LOC284296   | NM_175908.3 | LOC284296   | 19 | Homo sapiens hypothetical p | 0.00893024 | 0.01834319 | 2.22602094 |
| UPK1B       | NM_006952.3 | UPK1B       | 3  | Homo sapiens UP1B; UPK1; T  | 0.01810712 | 0.03185822 | 2.22376963 |
| LOC642035   | XM_936105.1 | LOC642035   |    | PREDICTED: Homo sapiens h   | 0.00056247 | 0.00211739 | 2.20797477 |
|             | Hs.197017   | Hs.197017   | 8  | wa17h04.x1 NCI_CGAP_Kid1    | 0.01127186 | 0.02206855 | 2.20653466 |
| RANBP9      | NM_005493.2 | RANBP9      | 6  | Homo sapiens RANBPM         | 0.01000816 | 0.02011628 | 2.20187615 |
| LOC10013391 | XM_00171627 | LOC10013391 |    | PREDICTED: Homo sapiens h   | 0.02493281 | 0.04100012 | 2.1949821  |
|             | Hs.382669   | Hs.382669   | 21 | Homo sapiens cDNA clone IM  | 0.02462723 | 0.04058973 | 2.184632   |
| LOC643234   | XM_931426.1 | LOC643234   | 6  | PREDICTED: Homo sapiens h   | 0.02580095 | 0.04209017 | 2.17998404 |
|             | Hs.555260   | Hs.555260   |    | 17000532215901 GRN_ES H     | 0.01154288 | 0.02250592 | 2.17873139 |
| ETAA1       | NM_019002.2 | ETAA1       | 2  | Homo sapiens ETAA16; FLJ2   | 0.01098304 | 0.0216317  | 2.17572529 |
| LOC441795   | XM_937553.1 | LOC441795   | 17 | PREDICTED: Homo sapiens s   | 0.03152748 | 0.04885793 | 2.17145015 |
| FAM65B      | NM_015864.2 | FAM65B      | 6  | Homo sapiens FAM65B; KIAA   | 0.0275981  | 0.04427103 | 2.17083204 |
| HIST2H2AA4  | NM_00104087 | HIST2H2AA4  | 1  | Homo sapiens H2A/R          | 3.64E-06   | 5.60E-05   | 2.16062377 |
|             | Hs.207074   | Hs.207074   | 9  | Homo sapiens, clone IMAGE:  | 0.03079395 | 0.04805695 | 2.15416991 |
| CD82        | NM_002231.3 | CD82        | 11 | Homo sapiens SAR2; TSPAN2   | 0.00058208 | 0.00218063 | 2.14983026 |
| FLJ10120    | XM_941652.1 | FLJ10120    |    | PREDICTED: Homo sapiens h   | 0.02914429 | 0.0461384  | 2.14958385 |
| SNAP23      | NM_003825.2 | SNAP23      | 15 | Homo sapiens SNAP23A; SN    | 0.00020404 | 0.00097601 | 2.14678495 |
|             | Hs.377660   | Hs.377660   | 11 | Homo sapiens cDNA FLJ2624   | 0.02712704 | 0.04367655 | 2.14666783 |
| BCAP29      | NM_00100840 | BCAP29      | 7  | Homo sapiens DKFZp686M2C    | 0.01058529 | 0.02098138 | 2.14560781 |
| BLOC1S2     | NM_00100134 | BLOC1S2     | 10 | Homo sapiens RP11-316M21    | 0.02095563 | 0.03576411 | 2.14360333 |
| OPHN1       | NM_002547.1 | OPHN1       |    | Homo sapiens OPN1; MRX60    | 0.02401677 | 0.03983126 | 2.14333403 |
| CCBL2       | NM_00100866 | CCBL2       | 1  | Homo sapiens DKFZp547N11    | 0.00090262 | 0.00303611 | 2.13718522 |
| SRR         | NM_021947.1 | SRR         | 17 | Homo sapiens ILV1; ISO1     | 0.01687886 | 0.03020076 | 2.13301812 |
| LCMT2       | NM_014793.3 | LCMT2       | 15 | Homo sapiens TYW4; PPM2;    | 0.01241101 | 0.02380987 | 2.12632929 |
| EPM2AIP1    | NM_014805.2 | EPM2AIP1    | 3  | Homo sapiens FLJ11207; KIA  | 0.000325   | 0.00138512 | 2.12416783 |
| B4GALNT1    | NM_001478.2 | B4GALNT1    | 12 | Homo sapiens GALGT; GALN/   | 0.0012421  | 0.00389811 | 2.11959051 |
| C3orf17     | NM_00102507 | C3ORF17     | 3  | Homo sapiens DKFZP434F20    | 0.02566574 | 0.04193254 | 2.11705191 |

## 2.0 ACL-Dependent Upreg

|             |             |              |                                 |            |            |            |
|-------------|-------------|--------------|---------------------------------|------------|------------|------------|
|             | Hs.565917   | HS.565917    | UI-H-BI3-alg-g-11-0-UI.s1 N     | 0.02834766 | 0.04519988 | 2.11610291 |
| TREM2       | NM_018965.1 | TREM2        | 6 Homo sapiens Trem2a; Trem     | 0.0300733  | 0.04719662 | 2.11451944 |
| C8orf44     | NM_019607.1 | C8ORF44      | 8 Homo sapiens FLJ11267         | 0.02512937 | 0.0412111  | 2.11052125 |
| LOC10012881 | XM_00173286 | LOC100128816 | PREDICTED: Homo sapiens A       | 0.00119844 | 0.00379618 | 2.10625769 |
| LOC728975   | XR_042006.1 | LOC728975    | PREDICTED: Homo sapiens n       | 0.02532033 | 0.04146795 | 2.10018907 |
| LOC10013479 | XM_00171880 | LOC10013479  | 7 PREDICTED: Homo sapiens s     | 0.01557702 | 0.02839025 | 2.0948003  |
| LOC648329   | XM_937382.1 | LOC648329    | PREDICTED: Homo sapiens h       | 0.00656012 | 0.01437117 | 2.08604968 |
| EXOC1       | NM_018261.3 | EXOC1        | 4 Homo sapiens SEC3L1; Sec3     | 0.00041886 | 0.00168847 | 2.08458462 |
| SELE        | NM_000450.1 | SELE         | 1 Homo sapiens LECAM2; ESEL     | 0.0081804  | 0.01710691 | 2.08274485 |
| LOC727787   | XM_925796.1 | LOC727787    | 19 PREDICTED: Homo sapiens s    | 0.02636376 | 0.04277714 | 2.08112452 |
| LOC388820   | XR_042089.1 | LOC388820    | 21 PREDICTED: Homo sapiens n    | 0.02920823 | 0.0462127  | 2.08020605 |
| SLC45A4     | NM_00108043 | SLC45A4      | 8 Homo sapiens KIAA1126         | 0.01194035 | 0.02310267 | 2.06671375 |
| GRB10       | NM_005311.3 | GRB10        | 7 Homo sapiens RSS; GRB-IR;     | 0.00383174 | 0.00938124 | 2.06501611 |
| SNX19       | NM_014758.1 | SNX19        | 11 Homo sapiens CHET8; DKFZ;    | 0.00574367 | 0.01289714 | 2.06125332 |
| PRSS22      | NM_022119.3 | PRSS22       | 16 Homo sapiens hBSSP-4; MGC    | 0.00621129 | 0.01373993 | 2.05665751 |
| BCL7A       | NM_020993.3 | BCL7A        | 12 Homo sapiens BCL7            | 0.00352048 | 0.00878745 | 2.05312809 |
| FGGY        | NM_018291.3 | FGGY         | 1 Homo sapiens FLJ10986; RP:    | 0.00395433 | 0.00961208 | 2.05151093 |
| CENTB2      | NM_012287.3 | CENTB2       | 3 Homo sapiens KIAA0041; CN     | 0.01889285 | 0.03293143 | 2.0514402  |
| YPEL3       | NM_031477.3 | YPEL3        | 16 Homo sapiens MGC10500        | 0.00541674 | 0.01229001 | 2.04694296 |
| ZNF48       | NM_152652.1 | ZNF48        | 16 Homo sapiens DKFZp762K01     | 0.00149672 | 0.00453734 | 2.0461887  |
| LOC388381   | XM_936648.1 | LOC388381    | PREDICTED: Homo sapiens h       | 0.03065365 | 0.04787237 | 2.03526438 |
|             | Hs.548645   | HS.548645    | 2 xj40e04.x1 Soares_NFL_T_G     | 0.02042456 | 0.03503932 | 2.0351405  |
| MYOG        | NM_002479.3 | MYOG         | 1 Homo sapiens MYF4; MYOGE      | 0.00792109 | 0.01665114 | 2.03448259 |
| FLJ43276    | NM_207382.1 | FLJ43276     | 15 Homo sapiens FLJ43276 prot   | 0.00121639 | 0.00383736 | 2.03351633 |
|             | Hs.209583   | HS.209583    | 9 UI-H-BW1-anz-d-01-0-UI.s1     | 0.02643196 | 0.04283664 | 2.02932544 |
| FLJ30092    | XM_933560.1 | FLJ30092     | 12 PREDICTED: Homo sapiens A    | 0.02251785 | 0.03781858 | 2.02400043 |
| C20orf133   | NM_080676.4 | C20ORF133    | 20 Homo sapiens RP11-189J1.1    | 0.01166908 | 0.02270311 | 2.02353072 |
| SRPK2       | NM_182692.1 | SRPK2        | 7 Homo sapiens FLJ36101; SFF    | 0.019465   | 0.03372858 | 2.01813017 |
| LOC400891   | NM_00101367 | LOC400891    | 22 Homo sapiens similar to chro | 0.00619105 | 0.0137119  | 2.01169532 |
| NUBP2       | NM_012225.1 | NUBP2        | 16 Homo sapiens CFD1; NUBP1     | 0.00434712 | 0.01034023 | 2.00875806 |
| NOS2        | NM_000625.4 | NOS2         | 17 Homo sapiens nitric oxide sy | 0.03002174 | 0.04713613 | 2.00858245 |
| PHF8        | NM_015107.1 | PHF8         | Homo sapiens ZNF422; MRX;       | 0.01353904 | 0.02542635 | 1.9953009  |
| NCRNA00094  | NR_015427.1 | NCRNA00094   | Homo sapiens non-protein cc     | 0.01734065 | 0.03079885 | 1.99267138 |
|             | Hs.545238   | HS.545238    | 8 ty84b12.x1 NCI_CGAP_Kid11     | 0.01505545 | 0.02762963 | 1.9913146  |
|             | Hs.520750   | HS.520750    | 7 UI-E-EJ0-ahs-a-06-0-UI.s1 U   | 0.00356023 | 0.0088582  | 1.98980643 |
| ATP6V1C1    | NM_001695.3 | ATP6V1C1     | 8 Homo sapiens VATC; FLJ200:    | 9.11E-05   | 0.00054241 | 1.98439782 |
| SLC30A6     | NM_017964.2 | SLC30A6      | 2 Homo sapiens MGC45055; FL     | 0.01177905 | 0.02285569 | 1.98151684 |
| LOC728448   | NR_003929.2 | LOC728448    | 1 Homo sapiens peptidylprolyl   | 0.01800524 | 0.03173034 | 1.97868175 |
| LOC654202   | XM_946257.1 | LOC654202    | PREDICTED: Homo sapiens s       | 0.02454376 | 0.04048287 | 1.97814515 |
|             | Hs.565209   | HS.565209    | 19 Homo sapiens cDNA FLJ3489    | 0.00093007 | 0.00310823 | 1.97396409 |
| CALHM1      | NM_00100141 | CALHM1       | 10 Homo sapiens calcium home    | 0.02786074 | 0.04462646 | 1.97393935 |
| OPN3        | NM_00103001 | OPN3         | 1 Homo sapiens ECPN             | 0.01731632 | 0.03076569 | 1.97337429 |
| CEP97       | NM_024548.2 | CEP97        | 3 Homo sapiens FLJ26462; FLJ    | 0.02904878 | 0.04604085 | 1.96968668 |
| ATP8B2      | NM_00100585 | ATP8B2       | 1 Homo sapiens ATPID; DKFZp     | 0.03112711 | 0.04840312 | 1.96438347 |
| ZNF215      | NM_013250.1 | ZNF215       | 11 Homo sapiens BAZ2            | 0.00037892 | 0.00155694 | 1.96166751 |
| CYorf15B    | NM_032576.2 | CYORF15B     | Homo sapiens chromosome \       | 0.02849204 | 0.04536354 | 1.9592881  |
| C11orf24    | NM_022338.2 | C11ORF24     | 11 Homo sapiens DM4E3           | 0.00382641 | 0.00937242 | 1.95770841 |
| ZNF74       | NM_003426.1 | ZNF74        | 22 Homo sapiens Zfp520; ZNF5:   | 0.00408446 | 0.00983819 | 1.95739361 |
| POLR2J      | NM_006234.4 | POLR2J       | 7 Homo sapiens RPB11; MGC7      | 0.00045305 | 0.00178525 | 1.95569475 |
| LOC389203   | XM_371691.4 | LOC389203    | PREDICTED: Homo sapiens h       | 0.00985623 | 0.01985495 | 1.95347848 |
| LOC653081   | XM_925877.1 | LOC653081    | 1 PREDICTED: Homo sapiens s     | 0.01451557 | 0.02688857 | 1.95208414 |
| TBC1D9      | NM_015130.1 | TBC1D9       | 4 Homo sapiens KIAA0882; MC     | 0.00161064 | 0.00479704 | 1.94839711 |
| SFRP1       | NM_003012.3 | SFRP1        | 8 Homo sapiens FRP; FrzA; SA    | 0.01285266 | 0.02443714 | 1.94479891 |
|             | Hs.103173   | HS.103173    | 12 BX100504 Soares_fetal_hear   | 0.03061284 | 0.04783614 | 1.94448552 |
| ACSM2B      | NM_182617.2 | ACSM2B       | 16 Homo sapiens HYST1046; H>    | 0.01713232 | 0.03052362 | 1.94272592 |
| FLJ35776    | XM_942115.1 | FLJ35776     | 18 Homo sapiens hypothetical p  | 0.01815638 | 0.03190356 | 1.93901068 |
| SAP18       | NM_005870.3 | SAP18        | 13 Homo sapiens SAP18p; MGC:    | 4.53E-05   | 0.00033532 | 1.93042514 |
| MGC22014    | XM_942026.1 | MGC22014     | PREDICTED: Homo sapiens h       | 0.00885606 | 0.01823217 | 1.92842523 |
| CNR1        | NM_016083.3 | CNR1         | 6 Homo sapiens CNR; CANN6;      | 0.00744202 | 0.0158619  | 1.92699877 |
| LOC10013082 | XR_042474.1 | LOC100130827 | PREDICTED: Homo sapiens n       | 0.02280379 | 0.03820435 | 1.92688631 |
| LOC645812   | XM_928801.1 | LOC645812    | 17 PREDICTED: Homo sapiens s    | 0.01613585 | 0.02920307 | 1.92228411 |
| LOC401152   | NM_00100170 | LOC401152    | 4 Homo sapiens HCV F-transac    | 0.01234654 | 0.02370291 | 1.91942186 |
|             | Hs.547160   | HS.547160    | 8 Homo sapiens, clone IMAGE:    | 0.01704255 | 0.03041354 | 1.91816629 |
|             | Hs.382309   | HS.382309    | 6 Homo sapiens cDNA clone IM    | 0.00297109 | 0.00769172 | 1.91734344 |
|             | Hs.534437   | HS.534437    | 14 Homo sapiens T cell antigen  | 0.01993638 | 0.03438092 | 1.91581435 |
| LOC642072   | XM_936152.1 | LOC642072    | PREDICTED: Homo sapiens s       | 0.00277881 | 0.00730706 | 1.90720235 |
| LOC642076   | XM_00171749 | LOC642076    | 6 PREDICTED: Homo sapiens s     | 0.0017735  | 0.005166   | 1.90430933 |
| LOC10012955 | NR_024618.1 | LOC10012955  | 3 Homo sapiens hypothetical L   | 0.00250347 | 0.00671131 | 1.90394613 |
| VPS18       | NM_020857.2 | VPS18        | 15 Homo sapiens KIAA1475; PE    | 0.00022166 | 0.00103791 | 1.9031413  |
| LOC643047   | XM_926417.1 | LOC643047    | 5 PREDICTED: Homo sapiens s     | 0.01798603 | 0.03170675 | 1.90137343 |

## 2.0 ACL-Dependent Upreg

|            |                        |   |                                  |            |            |            |
|------------|------------------------|---|----------------------------------|------------|------------|------------|
| SPTLC2     | NM_004863.2 SPTLC2     |   | 14 Homo sapiens SPT2; KIAA05     | 0.0282175  | 0.04505182 | 1.9007225  |
| RNU1F1     | NR_004402.1 RNU1F1     |   | 14 Homo sapiens UIF; HSD7        | 0.00013832 | 0.00072587 | 1.89833244 |
| LOC646717  | XM_929666.1 LOC646717  |   | 22 PREDICTED: Homo sapiens h     | 0.02436444 | 0.04027878 | 1.89815908 |
| ATRN       | NM_139322.1 ATRN       |   | 20 Homo sapiens DPPT-L; MGC1     | 0.02253278 | 0.03783781 | 1.89712402 |
| EDEM3      | NM_025191.2 EDEM3      |   | 1 Homo sapiens C1orf22           | 0.0097638  | 0.01970162 | 1.89684479 |
| EPHX1      | NM_000120.2 EPHX1      |   | 1 Homo sapiens EPOX; MEH; E      | 4.73E-05   | 0.00034593 | 1.89432896 |
| C10orf26   | NM_017787.3 C10ORF26   |   | 10 Homo sapiens MGC125648; I     | 0.00085637 | 0.0029139  | 1.89358804 |
| POLR3D     | NM_001722.2 POLR3D     |   | 8 Homo sapiens RPC53; BN51T      | 0.00372185 | 0.00919087 | 1.89269157 |
|            | Hs.400131 HS.400131    |   | 21 UI-E-EJO-air-c-22-0-UI.r1 UI- | 0.01832799 | 0.03214794 | 1.8899152  |
| C5orf41    | NM_153607.1 C5ORF41    |   | 5 Homo sapiens DKFZp686G20       | 0.02178095 | 0.03684859 | 1.88717864 |
| LOC729198  | XR_016035.1 LOC729198  |   | PREDICTED: Homo sapiens n        | 0.02250474 | 0.03780823 | 1.88472172 |
| RPL23AP53  | NR_003572.2 RPL23AP53  |   | 8 Homo sapiens ribosomal prot    | 0.00062971 | 0.00230893 | 1.88214255 |
|            | Hs.574069 HS.574069    |   | 12 ou17h07.s1 Soares_NFL_T_C     | 0.01431433 | 0.0265883  | 1.88022764 |
| LOC641999  | XM_936046.1 LOC641999  |   | PREDICTED: Homo sapiens h        | 0.02434633 | 0.04025498 | 1.87632609 |
| LOC728066  | XR_000634.1 LOC728066  |   | 2 PREDICTED: Homo sapiens h      | 0.00383621 | 0.00939008 | 1.87536953 |
| PAFAH2     | NM_000437.2 PAFAH2     |   | 1 Homo sapiens HSD-PLA2; FL      | 0.007925   | 0.01665614 | 1.86099267 |
| TOX4       | NM_014828.1 TOX4       |   | 14 Homo sapiens KIAA0737; LC     | 0.01167835 | 0.02271301 | 1.86072516 |
| KBTBD9     | XM_940375.1 KBTBD9     |   | 2 PREDICTED: Homo sapiens k      | 7.00E-05   | 0.00045174 | 1.86002971 |
|            | Hs.538716 HS.538716    |   | 11 ob56a07.s1 NCI_CGAP_GCB:      | 0.01286557 | 0.02445313 | 1.85654558 |
| ARSD       | NM_009589.2 ARSD       | X | 8 Homo sapiens arylsulfatase I   | 0.00593623 | 0.01325014 | 1.85370193 |
| LOC642216  | XM_942785.1 LOC642216  |   | PREDICTED: Homo sapiens h        | 0.02603774 | 0.04239373 | 1.84697401 |
| HIST2H2AC  | NM_003517.2 HIST2H2AC  |   | 1 Homo sapiens H2AFQ; MGC7       | 2.15E-05   | 0.00019666 | 1.84690348 |
| IGHMBP2    | NM_002180.1 IGHMBP2    |   | 11 Homo sapiens SMARD1; SML      | 0.01827932 | 0.03208846 | 1.84081788 |
| LOC728452  | XM_932756.1 LOC728452  |   | 5 PREDICTED: Homo sapiens s      | 0.00525332 | 0.01201959 | 1.83911816 |
| SLC48A1    | NM_017842.2 SLC48A1    |   | 12 Homo sapiens solute carrier f | 0.00078649 | 0.00272476 | 1.83258048 |
| OS9        | NM_006812.2 OS9        |   | 12 Homo sapiens amplified in os  | 0.00268531 | 0.0071059  | 1.82184894 |
| LOC151457  | XR_038833.1 LOC151457  |   | PREDICTED: Homo sapiens n        | 0.02317727 | 0.03870476 | 1.81978651 |
| LOC650737  | XM_944786.1 LOC650737  |   | PREDICTED: Homo sapiens h        | 0.00084884 | 0.00289191 | 1.81496461 |
| LCAP       | XM_927025.1 LCAP       | X | Homo sapiens lung carcinom.      | 0.00402997 | 0.00973932 | 1.81197182 |
| SMARCA2    | NM_003070.3 SMARCA2    |   | 9 Homo sapiens Sth1p; SNF2L      | 5.87E-05   | 0.00039855 | 1.81100252 |
| LOC654069  | XM_945683.1 LOC654069  |   | PREDICTED: Homo sapiens s        | 0.00065434 | 0.00237996 | 1.80487173 |
| CYB561D2   | NM_007022.3 CYB561D2   |   | 3 Homo sapiens TSP10; 101F6      | 0.00071324 | 0.0025398  | 1.80439801 |
| LOC653313  | XM_926835.1 LOC653313  | X | PREDICTED: Homo sapiens s        | 0.00636442 | 0.0139989  | 1.80165686 |
| RNF187     | XM_047499.9 RNF187     |   | 1 PREDICTED: Homo sapiens r      | 0.01103789 | 0.02172005 | 1.80102323 |
| ZFAND3     | NM_021943.1 ZFAND3     |   | 6 Homo sapiens FLJ13222; TE)     | 0.00066314 | 0.00239673 | 1.79902144 |
| LOC441066  | XM_496741.2 LOC441066  |   | 5 PREDICTED: Homo sapiens s      | 0.01957693 | 0.0338847  | 1.79321976 |
| NCRNA00081 | NR_024142.2 NCRNA00081 |   | 10 Homo sapiens non-protein cc   | 0.02530374 | 0.04145953 | 1.78897713 |
| SH3BP2     | NM_003023.2 SH3BP2     |   | 4 Homo sapiens CRPM; CRBM;       | 0.01587833 | 0.02879934 | 1.78602705 |
|            | Hs.530910 HS.530910    |   | 12 BX094949 Soares infant brai   | 0.03088396 | 0.04815594 | 1.78381134 |
| FAM8A1     | NM_016255.1 FAM8A1     |   | 6 Homo sapiens FLJ23721; AH      | 7.84E-05   | 0.00048879 | 1.7745717  |
| MANEA      | XM_938989.1 MANEA      |   | PREDICTED: Homo sapiens n        | 6.26E-05   | 0.0004167  | 1.77400597 |
|            | Hs.538134 HS.538134    |   | 1 7b56d05.x1 NCI_CGAP_Lu24       | 0.00756652 | 0.01607367 | 1.77392373 |
| PHACTR1    | NM_030948.1 PHACTR1    |   | 6 Homo sapiens RPEL; MGC12       | 0.00172451 | 0.00505721 | 1.76781147 |
| ZADH2      | NM_175907.3 ZADH2      |   | 18 Homo sapiens MGC45594         | 0.00116325 | 0.00372048 | 1.76751003 |
| RHPN1      | NM_052924.1 RHPN1      |   | 8 Homo sapiens ODF5; RHPN;       | 0.00221487 | 0.00608626 | 1.76444068 |
| WDFY3      | NM_178583.1 WDFY3      |   | 4 Homo sapiens ALFY; KIAA09      | 0.02943802 | 0.04646128 | 1.75792914 |
| SRA1       | NM_00103523 SRA1       |   | 5 Homo sapiens MGC87674; SI      | 0.00060392 | 0.00224696 | 1.74861595 |
| LACTB      | NM_171846.1 LACTB      |   | 15 Homo sapiens FLJ14902; G2     | 0.00080267 | 0.00276846 | 1.73802004 |
| LOC162073  | NM_00103484 LOC162073  |   | 16 Homo sapiens MGC126798; I     | 0.00378455 | 0.00929502 | 1.73683139 |
| KIAA0895   | NM_015314.1 KIAA0895   |   | 7 Homo sapiens KIAA0895 (KI      | 0.02268008 | 0.03802053 | 1.73555615 |
| FLJ20489   | NM_017842.1 FLJ20489   |   | 12 Homo sapiens hypothetical p   | 0.0049684  | 0.01152049 | 1.7327118  |
| TRAPPC6A   | NM_024108.1 TRAPPC6A   |   | 19 Homo sapiens MGC2650; TR      | 0.00220582 | 0.00606907 | 1.73201311 |
| C7orf54    | NM_014411.2 C7ORF54    |   | 7 Homo sapiens NSG-X; NAG8;      | 0.00863605 | 0.01786043 | 1.72794906 |
| IMPACT     | NM_018439.1 IMPACT     |   | 18 Homo sapiens MGC33718         | 0.01420862 | 0.02644619 | 1.72304175 |
| LOC730347  | XM_926614.1 LOC730347  |   | PREDICTED: Homo sapiens s        | 0.0016585  | 0.00489932 | 1.72213041 |
| CCRK       | NM_012119.3 CCRK       |   | 9 Homo sapiens p42; CDCH         | 0.00487934 | 0.01137466 | 1.71725528 |
| LOC642864  | XM_926255.1 LOC642864  |   | 1 PREDICTED: Homo sapiens h      | 0.02662751 | 0.04306365 | 1.71133115 |
| SLC26A2    | NM_000112.2 SLC26A2    |   | 5 Homo sapiens DTDST; MSTP:      | 0.00339323 | 0.0085089  | 1.70894291 |
| LOC390748  | XM_372648.3 LOC390748  |   | PREDICTED: Homo sapiens s        | 0.01196046 | 0.02312923 | 1.69940578 |
| LLGL2      | XM_946153.1 LLGL2      |   | PREDICTED: Homo sapiens k        | 0.00248058 | 0.00666969 | 1.69855032 |
| RFTN1      | NM_015150.1 RFTN1      |   | 3 Homo sapiens PIG9; RAFTLI      | 0.00016783 | 0.00084014 | 1.69531945 |
| RIN3       | NM_024832.1 RIN3       |   | 14 Homo sapiens FLJ11700; FLJ    | 0.02251119 | 0.03781323 | 1.69202139 |
| TAGLN      | NM_00100152 TAGLN      |   | 11 Homo sapiens TAGLN1; WS3      | 0.01200179 | 0.02318853 | 1.6911224  |
| NOS2A      | NM_153292.1 NOS2A      |   | 17 Homo sapiens HEP-NOS; INC     | 0.00065951 | 0.00239076 | 1.69101095 |
| OR8J3      | NM_00100406 OR8J3      |   | 11 Homo sapiens OR11-173         | 0.00638207 | 0.01402919 | 1.68461921 |
| NR1H2      | NM_007121.2 NR1H2      |   | 19 Homo sapiens NER; LXR-b; L    | 0.01408764 | 0.02623899 | 1.68340729 |
| C1orf210   | NM_182517.1 C1ORF210   |   | 1 Homo sapiens MGC52423          | 0.03214714 | 0.04968361 | 1.68212384 |
| ZNF532     | NM_018181.4 ZNF532     |   | 18 Homo sapiens FLJ10697         | 0.00011225 | 0.00062691 | 1.67473926 |
| RHBDL3     | NM_138328.2 RHBDL3     |   | 17 Homo sapiens RHBDL4; FLJ4     | 1.49E-05   | 0.00014806 | 1.67327025 |
| SIRT7      | NM_016538.1 SIRT7      |   | 17 Homo sapiens SIR2L7; MGC1     | 5.14E-05   | 0.00036435 | 1.67168432 |



## 2.0 ACL-Dependent Upreg

|             |                          |                                |            |            |            |
|-------------|--------------------------|--------------------------------|------------|------------|------------|
| RNF121      | NM_018320.3 RNF121       | 11 Homo sapiens FLJ11099       | 0.00062643 | 0.00230079 | 1.66955193 |
|             | Hs.426929 HS.426929      | 21 UI-H-FG0-bcw-h-18-0-UI.s1   | 0.01222063 | 0.02349856 | 1.66306201 |
|             | Hs.550111 HS.550111      | 1 AV647906 GLC Homo sapien:    | 0.02647956 | 0.04288181 | 1.65906355 |
| OMG         | NM_002544.3 OMG          | 17 Homo sapiens OMG            | 0.0062469  | 0.01379906 | 1.6590172  |
|             | Hs.154336 HS.154336      | 9 Homo sapiens clone 24583 rr  | 0.00286748 | 0.00747871 | 1.6559357  |
| LOC400304   | XM_375152.3 LOC400304    | 15 PREDICTED: Homo sapiens s   | 2.14E-05   | 0.00019603 | 1.6543417  |
| HEXDC       | NM_173620.1 HEXDC        | 17 Homo sapiens FLJ23825       | 0.00018171 | 0.00089601 | 1.65319353 |
| LOC649800   | XM_938870.1 LOC649800    | PREDICTED: Homo sapiens s      | 0.03045128 | 0.04763847 | 1.65298299 |
| RELL1       | NM_00108540 RELL1        | 4 Homo sapiens MGC50583; Fl    | 1.57E-05   | 0.00015398 | 1.64956797 |
| WWTR1       | NM_015472.3 WWTR1        | 3 Homo sapiens TAZ; DKFZP58    | 0.02716114 | 0.04371202 | 1.64869429 |
| RCADH5      | XM_00171439 RCADH5       | 6 PREDICTED: Homo sapiens s    | 0.00686452 | 0.01489689 | 1.64774414 |
| LOC10012827 | XM_00172555 LOC10012827  | 9 PREDICTED: Homo sapiens h    | 0.00783582 | 0.01651661 | 1.64268504 |
| LOC728969   | XM_00113292 LOC728969    | 1 PREDICTED: Homo sapiens s    | 0.00035628 | 0.00148867 | 1.64195409 |
| C20orf91    | XM_945481.1 C20ORF91     | PREDICTED: Homo sapiens c      | 0.0019579  | 0.00554993 | 1.63945999 |
| DST         | NM_020388.2 DST          | 6 Homo sapiens CATX-15; KIA    | 0.01149534 | 0.02243738 | 1.63674817 |
| SLC31A2     | NM_001860.1 SLC31A2      | 9 Homo sapiens hCTR2; CTR2;    | 0.00492293 | 0.01143701 | 1.63223931 |
| TRAK1       | NM_014965.2 TRAK1        | 3 Homo sapiens OIP106          | 0.01494401 | 0.02747149 | 1.63108685 |
| FCAMR       | NM_032029.2 FCAMR        | Homo sapiens FCA/MR; FKSC      | 0.01575029 | 0.02861487 | 1.63006347 |
| LOC644624   | XM_934133.1 LOC644624    | 4 PREDICTED: Homo sapiens h    | 0.0019238  | 0.00547757 | 1.61890298 |
| LAMA2       | NM_000426.3 LAMA2        | 6 Homo sapiens LAMM            | 0.02235179 | 0.03762107 | 1.61167339 |
| ING3        | NM_198267.1 ING3         | 7 Homo sapiens FLJ20089; p4;   | 0.01565636 | 0.02851094 | 1.61032379 |
| THAP4       | NM_015963.4 THAP4        | 2 Homo sapiens CGI-36          | 0.00589343 | 0.01317354 | 1.60973498 |
| UAP1L1      | NM_207309.1 UAP1L1       | 9 Homo sapiens RP11-229P13.    | 0.02450351 | 0.04043489 | 1.60311836 |
| CXorf40A    | NM_178124.3 CXorf40A X   | Homo sapiens EOLA1; CXorf      | 0.00137172 | 0.00422319 | 1.60228214 |
| H2AFJ       | NM_177925.1 H2AFJ        | 12 Homo sapiens FLJ10903; MG   | 6.92E-05   | 0.00044735 | 1.59411955 |
| ZNF574      | NM_022752.3 ZNF574       | 19 Homo sapiens FP972; FLJ22   | 0.02590504 | 0.04221562 | 1.58982104 |
| CBLB        | NM_170662.3 CBLB         | 3 Homo sapiens DKFZp779F14     | 0.00166129 | 0.00490355 | 1.58855683 |
| HIST1H1C    | NM_005319.3 HIST1H1C     | 6 Homo sapiens MGC3992; H1     | 2.55E-06   | 4.37E-05   | 1.58713972 |
| HBEGF       | NM_001945.1 HBEGF        | 5 Homo sapiens DTS; DTSF; H1   | 5.00E-05   | 0.00035794 | 1.58324586 |
| ERI3        | NM_024066.1 ERI3         | 1 Homo sapiens MGC2683; PIN    | 0.00912021 | 0.01864882 | 1.58187541 |
| FAM176A     | NM_00113503 FAM176A      | 2 Homo sapiens family with sei | 0.00206068 | 0.00577202 | 1.58165997 |
| ARHGAP23    | XM_930977.1 ARHGAP23     | 17 PREDICTED: Homo sapiens R   | 0.00467693 | 0.01097104 | 1.58015526 |
| AASDH       | NM_181806.2 AASDH        | 4 Homo sapiens LYS2; ACSF4;    | 0.02025783 | 0.03479173 | 1.57639435 |
| RANBP6      | NM_012416.2 RANBP6       | 9 Homo sapiens RAN binding p   | 0.02354259 | 0.03919438 | 1.57093123 |
| UBE2L3      | NM_003347.2 UBE2L3       | 22 Homo sapiens L-UBC; UBCH7   | 0.00014642 | 0.00075992 | 1.56763049 |
| SPOPL       | NM_00100166 SPOPL        | 2 Homo sapiens speckle-type F  | 0.0004431  | 0.00175686 | 1.56243589 |
| OR52E6      | NM_00100516 OR52E6       | 11 Homo sapiens OR11-58        | 0.02634106 | 0.04275308 | 1.56076747 |
|             | Hs.19339 HS.19339        | 3 Homo sapiens cDNA clone IM   | 2.82E-06   | 4.67E-05   | 1.55922165 |
| LOC643201   | XM_932165.1 LOC643201    | 5 PREDICTED: Homo sapiens h    | 0.00309735 | 0.00792421 | 1.55868516 |
| RGS11       | NM_183337.1 RGS11        | 16 Homo sapiens RS11           | 0.03146957 | 0.04878906 | 1.55821082 |
| GCC2        | NM_014635.3 GCC2         | 2 Homo sapiens KIAA0336; GC    | 0.00261143 | 0.00694932 | 1.55744195 |
| LOC10013424 | XM_00171742 LOC100134241 | PREDICTED: Homo sapiens h      | 0.00135517 | 0.00418052 | 1.55628243 |
| PI4KAP1     | XM_942088.1 PI4KAP1      | 22 Homo sapiens FLJ39405       | 0.00191329 | 0.00545766 | 1.5490082  |
| LQK1        | XR_041452.1 LQK1         | 1 PREDICTED: Homo sapiens n    | 0.00060664 | 0.00225399 | 1.54848434 |
| GMPPB       | NM_021971.1 GMPPB        | 3 Homo sapiens KIAA1851        | 0.00081039 | 0.00279064 | 1.54521484 |
| LOC728686   | XR_038523.1 LOC728686    | PREDICTED: Homo sapiens n      | 0.00211973 | 0.00589187 | 1.54135197 |
| KIAA1468    | NM_020854.2 KIAA1468     | 18 Homo sapiens HsT885; HsT3   | 0.00045688 | 0.00179644 | 1.52829578 |
| ELMOD2      | NM_153702.1 ELMOD2       | 4 Homo sapiens MGC10084; 9f    | 0.00390268 | 0.00951421 | 1.52419832 |
| BET1        | NM_005868.3 BET1         | 7 Homo sapiens HBET1; DKFZ     | 0.01113882 | 0.02185533 | 1.52332714 |
| ETFDH       | NM_004453.1 ETFDH        | 4 Homo sapiens MADD; ETFQ      | 4.17E-05   | 0.00031666 | 1.52237142 |
| ELL2        | NM_012081.3 ELL2         | Homo sapiens elongation fac    | 0.00265307 | 0.00703773 | 1.51277128 |
|             | Hs.483906 HS.483906      | Homo sapiens mRNA; cDNA l      | 0.00409017 | 0.00984977 | 1.51200318 |
|             | Hs.130036 HS.130036      | 14 Homo sapiens cDNA FLJ4230   | 0.00012243 | 0.00066497 | 1.50802131 |
| GXYLT1      | XM_290597.6 GXYLT1       | 12 Homo sapiens FLJ43151       | 0.00338549 | 0.0084993  | 1.50788763 |
| LOC643035   | XM_931999.1 LOC643035    | 1 PREDICTED: Homo sapiens s    | 0.00135031 | 0.0041679  | 1.50359716 |
| ATP13A3     | XM_931948.1 ATP13A3      | 3 PREDICTED: Homo sapiens A    | 0.03033027 | 0.04748334 | 1.49814233 |
| GPR83       | NM_016540.2 GPR83        | 11 Homo sapiens GPR72; GIR     | 0.02878567 | 0.04571049 | 1.49696426 |
| GBA         | NM_00100574 GBA          | 1 Homo sapiens GCB; GBA1; G    | 7.40E-05   | 0.00046849 | 1.49642971 |
| LOC390387   | XR_000589.1 LOC390387    | 13 PREDICTED: Homo sapiens s   | 0.02790548 | 0.04467179 | 1.49419422 |
| KIAA1715    | NM_030650.1 KIAA1715     | 2 Homo sapiens LNP; MGC102     | 0.00338026 | 0.00848814 | 1.49327861 |
| LOC729101   | NM_144981.1 LOC729101    | 11 PREDICTED: Homo sapiens n   | 0.00093133 | 0.0031115  | 1.49263348 |
| GMCL1       | NM_178439.3 GMCL1        | 2 Homo sapiens GCL1; BTBD1     | 0.00023348 | 0.00107658 | 1.49260357 |
|             | Hs.572219 HS.572219      | CM3-MT0357-260101-690-b:       | 4.02E-05   | 0.0003072  | 1.49061739 |
| LOC10013183 | XM_00172659 LOC100131831 | PREDICTED: Homo sapiens h      | 0.002214   | 0.00608542 | 1.48797361 |
| GNPDA2      | NM_138335.1 GNPDA2       | 4 Homo sapiens SB52            | 0.00787252 | 0.01657469 | 1.4861147  |
| LYSMD4      | NM_152449.2 LYSMD4       | 15 Homo sapiens MGC99501; Fl   | 0.00016572 | 0.00083341 | 1.48315109 |
| CBY1        | NM_015373.3 CBY1         | 22 Homo sapiens PGEA1; arb1;   | 0.0003762  | 0.00154928 | 1.4779896  |
| GOLGA8G     | NM_00101242 GOLGA8G      | 15 Homo sapiens DKFZp434K05    | 0.0104196  | 0.02073618 | 1.47520902 |
| LOC645236   | XM_928275.1 LOC645236    | 7 PREDICTED: Homo sapiens s    | 0.00680645 | 0.01481525 | 1.46850257 |
| ZNF419      | NM_024691.2 ZNF419       | 19 Homo sapiens ZNF419A; FLJ   | 0.00463513 | 0.01089887 | 1.46810409 |

## 2.0 ACL-Dependent Upreg

|           |                       |   |                                |            |            |            |
|-----------|-----------------------|---|--------------------------------|------------|------------|------------|
| SH3BP5L   | NM_030645.1 SH3BP5L   |   | 1 Homo sapiens FLJ33845; KIA   | 0.00015897 | 0.00080845 | 1.4671723  |
| PINX1     | NM_017884.3 PINX1     |   | 8 Homo sapiens LPT5; MGC88     | 0.01242033 | 0.02381933 | 1.46478653 |
| GFOD1     | NM_018988.1 GFOD1     |   | 6 Homo sapiens glucose-fructo  | 0.00366345 | 0.00907141 | 1.46283134 |
| TGOLN2    | NM_006464.2 TGOLN2    |   | 2 Homo sapiens TGN51; MGC1     | 3.12E-05   | 0.00025616 | 1.46140091 |
| IGFALS    | NM_004970.1 IGFALS    |   | 16 Homo sapiens ALS            | 0.00411933 | 0.00990681 | 1.45952752 |
|           | Hs.534680 HS.534680   |   | PREDICTED: Homo sapiens h      | 0.01030225 | 0.02055533 | 1.45851057 |
| B9D2      | NM_030578.2 B9D2      |   | 19 Homo sapiens MGC4093; ICI   | 0.01301499 | 0.02467241 | 1.45834392 |
| GOSR2     | NM_054022.2 GOSR2     |   | 17 Homo sapiens GS27; MEMBR    | 0.02416665 | 0.04002486 | 1.45762225 |
| C16orf93  | NM_00101497 C16ORF93  |   | 16 Homo sapiens MGC104706      | 0.00020299 | 0.00097183 | 1.45626814 |
| LOC646300 | XM_929241.1 LOC646300 |   | PREDICTED: Homo sapiens s      | 0.02267907 | 0.03802471 | 1.45407006 |
| C4orf48   | NM_00114193 C4ORF48   |   | 4 Homo sapiens chromosome 4    | 0.00023377 | 0.00107701 | 1.45238441 |
| POU2F1    | NM_002697.2 POU2F1    |   | 1 Homo sapiens OCT1; OTF1      | 0.02838204 | 0.04523479 | 1.44921995 |
| SCARNA14  | NR_004388.1 SCARNA14  |   | 15 Homo sapiens U100           | 0.00023289 | 0.00107475 | 1.44572323 |
|           | Hs.107418 HS.107418   |   | 5 Homo sapiens cDNA FLJ4185    | 0.00083547 | 0.00285712 | 1.44130813 |
| SNORA49   | NR_002979.2 SNORA49   |   | 12 Homo sapiens small nucleola | 0.0310446  | 0.04832323 | 1.43779572 |
| IFRD1     | NM_001550.2 IFRD1     |   | 7 Homo sapiens PC4; TIS7       | 0.00122283 | 0.00384875 | 1.43657559 |
| CXorf40B  | NM_00101384 CXORF40B  | X | Homo sapiens chromosome 9      | 0.0002102  | 0.00099931 | 1.43400578 |
| SUV420H1  | NM_016028.4 SUV420H1  |   | 11 Homo sapiens MGC21161; M    | 0.01451716 | 0.02688693 | 1.43300989 |
| FLVCR2    | NM_017791.1 FLVCR2    |   | 14 Homo sapiens FLVCR2; C14o   | 0.02938254 | 0.04641416 | 1.42914279 |
| C18orf32  | NM_00103500 C18ORF32  |   | 18 Homo sapiens FLJ23458       | 0.00013898 | 0.00272829 | 1.42790326 |
|           | Hs.570988 HS.570988   |   | 5 Homo sapiens primary neuro   | 0.00048042 | 0.00187006 | 1.42497501 |
| RGPD4     | XM_935060.1 RGPD4     |   | 2 PREDICTED: Homo sapiens R    | 0.03161427 | 0.04897148 | 1.424474   |
|           | Hs.193557 HS.193557   |   | 1 Homo sapiens cDNA FLJ3240    | 0.00488411 | 0.01137845 | 1.42406513 |
| BLCAP     | NM_006698.2 BLCAP     |   | 20 Homo sapiens BC10           | 0.00101896 | 0.00334563 | 1.42342679 |
| KIAA1539  | NM_025182.2 KIAA1539  |   | 9 Homo sapiens P1.11659_5; f   | 0.02839157 | 0.04524334 | 1.42063815 |
| WDR37     | NM_014023.3 WDR37     |   | 10 Homo sapiens KIAA0982; RP   | 0.00027527 | 0.00121809 | 1.42001247 |
| SLC35C2   | NM_173073.2 SLC35C2   |   | 20 Homo sapiens FLJ37039; BA   | 0.01543062 | 0.0281754  | 1.41584451 |
| JAK1      | NM_002227.1 JAK1      |   | 1 Homo sapiens JAK1B; JAK1A    | 0.02418077 | 0.04004215 | 1.41159672 |
| C12orf23  | NM_152261.1 C12ORF23  |   | 12 Homo sapiens FLJ13959; MG   | 0.02503427 | 0.04109234 | 1.40902839 |
| TRAK2     | NM_015049.1 TRAK2     |   | 2 Homo sapiens KIAA0549; GR    | 0.00038693 | 0.00158325 | 1.40623936 |
| MORN2     | NM_194270.1 MORN2     |   | 2 Homo sapiens MGC126131; I    | 0.00046962 | 0.00183722 | 1.40505531 |
| SEMG2     | NM_003008.2 SEMG2     |   | 20 Homo sapiens SGII           | 0.01615652 | 0.02923074 | 1.40392446 |
| C10orf32  | NM_144591.1 C10ORF32  |   | 10 Homo sapiens RP11-753C18.   | 0.00036966 | 0.00152987 | 1.40245197 |
| CD163L1   | NM_174941.4 CD163L1   |   | 12 Homo sapiens M160; CD163I   | 0.00065027 | 0.00236915 | 1.40192976 |
| ZFAND6    | NM_019006.2 ZFAND6    |   | 15 Homo sapiens ZA20D3; AWP    | 2.81E-05   | 0.00023824 | 1.40029971 |
| ARFIP1    | NM_00102559 ARFIP1    |   | 4 Homo sapiens MGC117369; I    | 0.00242403 | 0.00655658 | 1.39784126 |
| BTBD10    | NM_032320.4 BTBD10    |   | 11 Homo sapiens MGC13007; G    | 1.52E-05   | 0.00015033 | 1.39531472 |
| MPPE1     | NM_023075.3 MPPE1     |   | 18 Homo sapiens metallophosph  | 0.00418384 | 0.01003089 | 1.38822292 |
| CLEC11A   | NM_002975.2 CLEC11A   |   | 19 Homo sapiens LSLCL; P47; S  | 0.00159394 | 0.00475774 | 1.38765351 |
| FAM116A   | NM_152678.1 FAM116A   |   | PREDICTED: Homo sapiens fi     | 0.00011858 | 0.00065184 | 1.38632227 |
| LOC440225 | XR_042392.1 LOC440225 |   | PREDICTED: Homo sapiens n      | 0.0230238  | 0.03848988 | 1.3853943  |
| LPCAT1    | NM_024830.3 LPCAT1    |   | 5 Homo sapiens FLJ12443; PF    | 0.00552599 | 0.01249355 | 1.38485712 |
| VPS13B    | NM_152564.3 VPS13B    |   | 8 Homo sapiens COH1; DKFZp     | 0.00875342 | 0.01805164 | 1.384662   |
| RPS4Y2    | NM_00103956 RPS4Y2    | Y | Homo sapiens RPS4Y2P           | 0.00453201 | 0.01071435 | 1.38374614 |
| MED14     | NM_004229.3 MED14     | X | Homo sapiens CXorf4; CRSP      | 0.01974416 | 0.03410897 | 1.38284976 |
| TMEM185A  | NM_032508.1 TMEM185A  | X | Homo sapiens FAM11A; MGC       | 0.01020177 | 0.02039603 | 1.38206406 |
| LOC730820 | NM_030759.1 LOC730820 |   | PREDICTED: Homo sapiens s      | 0.000122   | 0.00066427 | 1.37659998 |
| ENPP4     | NM_014936.3 ENPP4     |   | 6 Homo sapiens KIAA0879; NP    | 0.00378326 | 0.00929395 | 1.37516752 |
| TYROBP    | NM_003332.2 TYROBP    |   | 19 Homo sapiens DAP12; KARAI   | 0.02963792 | 0.04668187 | 1.37295058 |
| DIRC2     | NM_032839.1 DIRC2     |   | 3 Homo sapiens FLJ14784; RC    | 2.32E-05   | 0.00020654 | 1.37126427 |
| GDPD1     | NM_182569.1 GDPD1     |   | 17 Homo sapiens FLJ27503; UG   | 0.03127647 | 0.04857282 | 1.36959251 |
| PRRG1     | NM_000950.1 PRRG1     | X | Homo sapiens PRGP1             | 0.00411209 | 0.00989379 | 1.36781811 |
| FER       | NM_005246.1 FER       |   | 5 Homo sapiens TYK3            | 0.00019285 | 0.00093524 | 1.36671756 |
| HADHA     | NM_000182.3 HADHA     |   | 2 Homo sapiens LCHAD; MGC1     | 0.01893868 | 0.03299544 | 1.36667171 |
| TRIM5     | NM_033092.1 TRIM5     |   | 11 Homo sapiens RNF88; TRIM5   | 0.01242348 | 0.02382117 | 1.366139   |
| LOC643558 | XM_932319.1 LOC643558 |   | 7 PREDICTED: Homo sapiens s    | 0.01815225 | 0.03190662 | 1.36412766 |
| C17orf95  | NM_00108051 C17ORF95  |   | 17 Homo sapiens chromosome 1   | 0.0001143  | 0.00063507 | 1.3637091  |
| LYRM5     | NM_00100166 LYRM5     |   | 12 Homo sapiens LYR motif cont | 0.02247201 | 0.03777077 | 1.36301703 |
| SNRK      | NM_017719.3 SNRK      |   | 3 Homo sapiens HSNFRK; DKF     | 0.00018337 | 0.00090175 | 1.36163592 |
| LOC644799 | XM_934554.1 LOC644799 |   | 20 PREDICTED: Homo sapiens h   | 7.17E-07   | 1.85E-05   | 1.36147303 |
| C1GALT1C1 | NM_00101155 C1GALT1C1 | X | Homo sapiens MGC19947; C       | 0.00046002 | 0.00180489 | 1.35857489 |
| C1orf66   | NM_015997.2 C1ORF66   |   | 1 Homo sapiens CGI-41          | 0.00141455 | 0.00433416 | 1.35691148 |
| NFKB2     | NM_00107749 NFKB2     |   | 10 Homo sapiens LYT10; LYT-10  | 0.01339246 | 0.02522517 | 1.35467472 |
| MPV17     | NM_002437.3 MPV17     |   | 2 Homo sapiens SYM1            | 1.28E-05   | 0.00013163 | 1.35377465 |
| FBXO8     | NM_012180.2 FBXO8     |   | 4 Homo sapiens FBS; FBX8; D    | 0.00358864 | 0.00891257 | 1.35273916 |
| RRM2      | NM_001034.1 RRM2      |   | 2 Homo sapiens RRM2; R2        | 6.77E-05   | 0.00044203 | 1.35242597 |
| PTRH1     | NM_00100291 PTRH1     |   | 9 Homo sapiens MGC51999; P     | 0.00217226 | 0.00599799 | 1.35217513 |
| SLC31A1   | NM_001859.2 SLC31A1   |   | 9 Homo sapiens hCTR1; COPT1    | 0.00433778 | 0.01032253 | 1.35146899 |
| PKD2      | NM_000297.2 PKD2      |   | 4 Homo sapiens PC2; PKD4; A    | 0.01536616 | 0.02809073 | 1.35071112 |
| AYP1p1    | XR_001434.1 AYP1P1    |   | PREDICTED: Homo sapiens A      | 0.01656608 | 0.02980304 | 1.34771462 |

## 2.0 ACL-Dependent Upreg

|            |             |            |    |              |                            |            |            |            |
|------------|-------------|------------|----|--------------|----------------------------|------------|------------|------------|
| ITPK1      | NM_014216.3 | ITPK1      | 14 | Homo sapiens | ITRPK1                     | 0.00506335 | 0.01168829 | 1.34747288 |
| LOC647346  | XM_942836.1 | LOC647346  |    |              | PREDICTED: Homo sapiens s  | 0.0004053  | 0.0016405  | 1.34498487 |
| LOC2555783 | XR_001409.1 | LOC2555783 | 19 | Homo sapiens | hypothetical p             | 0.00011006 | 0.00061913 | 1.34423389 |
| CHIC2      | NM_012110.2 | CHIC2      | 4  | Homo sapiens | BTL; MGC211;               | 8.90E-05   | 0.00053488 | 1.34248508 |
| OKL38      | NM_013370.2 | OKL38      | 16 | Homo sapiens | BDGI                       | 0.00022485 | 0.00104922 | 1.34121959 |
| ABHD15     | NM_198147.1 | ABHD15     | 17 | Homo sapiens | abhydrolase d              | 0.02835806 | 0.04520983 | 1.33753537 |
| ELOVL1     | NM_022821.2 | ELOVL1     | 1  | Homo sapiens | CGI-88; Ssc1               | 0.02005858 | 0.03453139 | 1.33619648 |
| PNPLA2     | NM_020376.2 | PNPLA2     | 11 | Homo sapiens | PEDF-R; FP17!              | 0.00061675 | 0.00227756 | 1.33519208 |
| SEPHS2     | NM_012248.2 | SEPHS2     | 16 | Homo sapiens | SPS2                       | 0.00103348 | 0.00338105 | 1.33252618 |
| CPVL       | NM_031311.3 | CPVL       | 7  | Homo sapiens | HVLP; MGC10                | 0.00018377 | 0.00090129 | 1.3316905  |
| IRX1       | NM_024337.3 | IRX1       | 5  | Homo sapiens | IRX-5                      | 0.02866817 | 0.04557719 | 1.33090083 |
| MOAP1      | NM_022151.4 | MOAP1      | 14 | Homo sapiens | MAP-1; PNMA                | 0.00037278 | 0.00153867 | 1.33017793 |
| NRBF2      | NM_030759.3 | NRBF2      | 10 | Homo sapiens | COPR2; COPR                | 0.00879915 | 0.01813563 | 1.3278175  |
| APITD1     | NM_198544.2 | APITD1     | 1  | Homo sapiens | MGC32686; Cl               | 0.00237444 | 0.00644492 | 1.32668452 |
| UBAP2      | NM_018449.2 | UBAP2      | 9  | Homo sapiens | FLJ22435; KIA              | 0.00371119 | 0.00917081 | 1.32636668 |
| NAP1L6     | XR_017709.1 | NAP1L6     |    |              | PREDICTED: Homo sapiens n  | 0.00795727 | 0.01671104 | 1.32606448 |
| DHRS7B     | NM_015510.3 | DHRS7B     | 17 | Homo sapiens | MGC8916; CG                | 7.33E-05   | 0.00046551 | 1.32534104 |
| OXR1       | NM_181354.3 | OXR1       | 8  | Homo sapiens | FLJ10125; FLJ              | 9.09E-06   | 0.00010424 | 1.32487223 |
| SAMD4B     | NM_018028.2 | SAMD4B     | 19 | Homo sapiens | FLJ10211; SM               | 0.02636264 | 0.04278173 | 1.32228323 |
| SLC12A2    | NM_001046.2 | SLC12A2    | 5  | Homo sapiens | NKCC1; BSC2                | 0.00021232 | 0.00100072 | 1.32225281 |
| LOC92659   | NR_015454.1 | LOC92659   | 17 | Homo sapiens | hypothetical L             | 0.00178842 | 0.00519276 | 1.31890986 |
| UGCGL2     | NM_020121.2 | UGCGL2     | 13 | Homo sapiens | MGC87276; Fl               | 0.00092131 | 0.00308752 | 1.31815403 |
| PTPRA      | NM_002836.2 | PTPRA      | 20 | Homo sapiens | HPTPalpha; Rf              | 0.00065411 | 0.00237992 | 1.31603809 |
| PLK2       | NM_006622.1 | PLK2       | 5  | Homo sapiens | SNK                        | 0.02303493 | 0.03850256 | 1.31590728 |
| CBX4       | NM_003655.2 | CBX4       | 17 | Homo sapiens | NBP16; PC2; P              | 0.00054102 | 0.0020523  | 1.31519575 |
| FES        | NM_002005.2 | FES        | 15 | Homo sapiens | FPS                        | 0.00012118 | 0.0006618  | 1.31110329 |
| ABCD3      | NM_002858.2 | ABCD3      | 1  | Homo sapiens | ABC43; PXMP:               | 0.00990263 | 0.01993733 | 1.30749569 |
| ALG6       | NM_013339.2 | ALG6       | 1  | Homo sapiens | asparagine-lin             | 8.87E-05   | 0.00053408 | 1.30623955 |
| LOC283267  | NR_015451.1 | LOC283267  | 11 | Homo sapiens | hypothetical L             | 0.00241388 | 0.00653239 | 1.30485166 |
| MCFD2      | NM_139279.3 | MCFD2      | 2  | Homo sapiens | DKFZp686G21                | 0.00453867 | 0.01072543 | 1.30274514 |
| KIDINS220  | NM_020738.1 | KIDINS220  | 2  | Homo sapiens | ARMS; MGC16                | 0.00060161 | 0.00223992 | 1.3025845  |
| ZNF45      | NM_003425.2 | ZNF45      | 19 | Homo sapiens | KOX5; ZNF13                | 0.02628043 | 0.0427057  | 1.30246368 |
| CLCN3      | NM_001829.2 | CLCN3      | 4  | Homo sapiens | CIC-3; CLC3                | 0.00450244 | 0.01066068 | 1.29461919 |
| ELAVL1     | NM_001419.2 | ELAVL1     | 19 | Homo sapiens | MelG; HUR; El              | 0.00093667 | 0.00312262 | 1.29441868 |
| IDH3G      | NM_004135.2 | IDH3G      |    |              | Homo sapiens H-IDHG        | 0.0003824  | 0.00156829 | 1.29119558 |
| FOXO4      | NM_005938.1 | FOXO4      |    |              | Homo sapiens AFX1; AFX; FC | 0.01555959 | 0.02836799 | 1.29117693 |
| LOC648740  | NR_024438.2 | LOC648740  | 1  | Homo sapiens | ACTB pseudog               | 0.00397177 | 0.0096394  | 1.29094574 |
| PIK3C3     | NM_002647.2 | PIK3C3     | 18 | Homo sapiens | MGC61518; Vj               | 0.01126424 | 0.02206557 | 1.29049793 |
| MPHOSPH8   | NM_017520.2 | MPHOSPH8   | 13 | Homo sapiens | TWA3; FLJ352               | 0.00089097 | 0.00300158 | 1.29030663 |
| UBL3       | NM_007106.2 | UBL3       | 13 | Homo sapiens | DKFZP434K15                | 0.00508181 | 0.01172095 | 1.29017705 |
| POLR2J2    | NM_032959.4 | POLR2J2    | 7  | Homo sapiens | MGC54043; M                | 2.83E-05   | 0.00233887 | 1.28851789 |
| GCLC       | NM_001498.2 | GCLC       | 6  | Homo sapiens | GCS; GLCLC; I              | 0.01173596 | 0.02278021 | 1.28779545 |
| CHTF18     | NM_022092.1 | CHTF18     | 16 | Homo sapiens | Ctf18; C321D;              | 0.00066881 | 0.00241244 | 1.28771418 |
| OXSM       | NM_017897.1 | OXSM       | 3  | Homo sapiens | FLJ20604; FA               | 0.00135242 | 0.00417322 | 1.28647062 |
| QSOX1      | NM_002826.4 | QSOX1      | 1  | Homo sapiens | QSCN6; FLJ34               | 0.00031155 | 0.0013399  | 1.28631058 |
| SERINC3    | NM_198941.1 | SERINC3    | 20 | Homo sapiens | TMS-1; TDE; S              | 0.00635637 | 0.01398684 | 1.28620917 |
| C12orf62   | NM_032901.2 | C12ORF62   | 12 | Homo sapiens | MGC14288                   | 0.00156017 | 0.00468524 | 1.28541508 |
| TUSC2      | NM_007275.1 | TUSC2      | 3  | Homo sapiens | FUS1; C3orf11              | 0.02352236 | 0.0391667  | 1.28463975 |
| GPC2       | NM_152742.1 | GPC2       | 7  | Homo sapiens | FLJ38962; DK               | 0.00538672 | 0.0122449  | 1.28411371 |
| SSR2       | NM_003145.2 | SSR2       | 1  | Homo sapiens | HSD25; DKFZ                | 1.79E-05   | 0.00017075 | 1.28404394 |
| RAB8B      | NM_016530.2 | RAB8B      | 15 | Homo sapiens | FLJ38125                   | 0.0032107  | 0.00815467 | 1.28263652 |
| ANTXR1     | NM_032208.1 | ANTXR1     | 2  | Homo sapiens | ATR; FLJ2177               | 0.00132956 | 0.00411789 | 1.28099894 |
| DOPEY2     | NM_005128.2 | DOPEY2     | 21 | Homo sapiens | C21orf5                    | 0.01190359 | 0.02304797 | 1.28080618 |
| RIOK3      | NM_003831.2 | RIOK3      | 18 | Homo sapiens | DKFZp779L13                | 5.38E-05   | 0.0003767  | 1.28079073 |
| C7orf43    | NM_018275.3 | C7ORF43    | 7  | Homo sapiens | FLJ10925; DK               | 0.01028039 | 0.02052302 | 1.27957625 |
| RHBDF1     | NM_022450.2 | RHBDF1     | 16 | Homo sapiens | gene -90; gen              | 0.00019645 | 0.0009493  | 1.27702298 |
| GOLGA7     | NM_016099.2 | GOLGA7     | 8  | Homo sapiens | MGC4876; GO                | 0.00018245 | 0.00089846 | 1.27398774 |
| CRBN       | NM_016302.2 | CRBN       | 3  | Homo sapiens | MGC27358; D                | 0.01106401 | 0.02174781 | 1.27362982 |
| LOC641992  | XM_935770.1 | LOC641992  |    |              | PREDICTED: Homo sapiens s  | 0.01204746 | 0.02325196 | 1.27354055 |
| MYCBP2     | NM_015057.2 | MYCBP2     | 13 | Homo sapiens | FLJ21597; PAI              | 0.00474371 | 0.01110852 | 1.27285765 |
| INSIG2     | NM_016133.2 | INSIG2     | 2  | Homo sapiens | MGC26273                   | 0.00092604 | 0.00309666 | 1.27272611 |
| TSNAX      | NM_005999.2 | TSNAX      | 1  | Homo sapiens | TRAX                       | 0.00051281 | 0.00196446 | 1.26977985 |
| M160       | NM_174941.3 | M160       | 12 | Homo sapiens | CD163B                     | 0.00068772 | 0.00246917 | 1.26829943 |
| UFM1       | NM_016617.1 | UFM1       | 13 | Homo sapiens | bA131P10.1; C              | 0.00047166 | 0.00184323 | 1.26718461 |
| STAT1      | NM_139266.1 | STAT1      | 2  | Homo sapiens | ISGF-3; STAT               | 3.08E-05   | 0.00025363 | 1.26607674 |
| POLR3B     | NM_018082.3 | POLR3B     | 12 | Homo sapiens | PC2; FLJ103                | 0.01366489 | 0.02561401 | 1.26490003 |
| FTSJ3      | NM_017647.2 | FTSJ3      | 17 | Homo sapiens | FLJ20062; EP               | 0.00533511 | 0.012153   | 1.2644231  |
| RIC8B      | NM_018157.1 | RIC8B      | 12 | Homo sapiens | hSyn; FLJ106               | 0.01487264 | 0.02737271 | 1.26115194 |
| DLEU2      | XM_934422.1 | DLEU2      | 13 | Homo sapiens | MGC88287; II               | 0.00355318 | 0.00884672 | 1.26087136 |
| ASF1A      | NM_014034.1 | ASF1A      | 6  | Homo sapiens | DKFZP547E21                | 0.00163734 | 0.00485793 | 1.26052319 |

## 2.0 ACL-Dependent Upreg

|           |                       |                                |            |            |             |
|-----------|-----------------------|--------------------------------|------------|------------|-------------|
| HTRA2     | NM_013247.4 HTRA2     | 2 Homo sapiens PARK13; OMI;    | 0.01373572 | 0.02572459 | 1.26030946  |
| TCTN3     | NM_015631.4 TCTN3     | Homo sapiens tectonic family   | 0.01086174 | 0.02143162 | 1.26006192  |
| DBT       | Hs.444093 DBT         | 1 Homo sapiens BCATE2; MGC     | 0.00313193 | 0.00800136 | 1.25977202  |
| ACAA1     | NM_001607.2 ACAA1     | 3 Homo sapiens THIO; ACAA; I   | 0.0016103  | 0.00479736 | 1.25916673  |
| C2orf42   | NM_017880.1 C2ORF42   | 2 Homo sapiens FLJ20558        | 0.00951579 | 0.01930874 | 1.25862152  |
| ETS1      | NM_005238.2 ETS1      | 11 Homo sapiens FLJ10768; ET   | 0.00103378 | 0.003381   | 1.25740206  |
| MGC72104  | NM_207350.1 MGC72104  | 20 Homo sapiens similar to FRG | 0.00254417 | 0.00679864 | 1.25723815  |
| COQ10A    | NM_144576.2 COQ10A    | 12 Homo sapiens FLJ32452       | 0.00730584 | 0.01562375 | 1.254739    |
| FAM131A   | NM_144635.3 FAM131A   | 3 Homo sapiens MGC21688; Pf    | 0.00532861 | 0.01214075 | 1.25300072  |
| TMEM184C  | NM_018241.2 TMEM184C  | 4 Homo sapiens transmembran    | 0.00831619 | 0.01734747 | 1.25287524  |
| MNAT1     | NM_002431.2 MNAT1     | 14 Homo sapiens MAT1; RNF66    | 0.00051241 | 0.00196432 | 1.25237434  |
| AFTPH     | NM_017657.3 AFTPH     | 2 Homo sapiens MGC33965; Fl    | 0.0086494  | 0.01788124 | 1.25197068  |
| USP9X     | NM_004652.3 USP9X     | Homo sapiens DFFRX; FAF        | 0.00199078 | 0.00562408 | 1.25149627  |
| SASH1     | NM_015278.3 SASH1     | 6 Homo sapiens RP3-323M4.1;    | 0.01712648 | 0.03052322 | 1.25144464  |
| EXTL2     | NM_00103302 EXTL2     | 1 Homo sapiens EXTR2           | 0.00347677 | 0.00869432 | 1.25124003  |
| FAM190B   | NM_018999.2 FAM190B   | 10 Homo sapiens FLJ14262; Gc   | 0.01744285 | 0.03092983 | 1.25102247  |
| SIL1      | NM_00103763 SIL1      | 5 Homo sapiens MSS; BAP; UL    | 0.01092833 | 0.02153956 | 1.24843522  |
| C14orf129 | NM_016472.3 C14ORF129 | 14 Homo sapiens HSPC210; GS    | 0.00037374 | 0.00154206 | 1.24767917  |
| UNC5A     | NM_133369.2 UNC5A     | 5 Homo sapiens UNC5H1; FLJ1    | 0.00439314 | 0.01043371 | 1.24682734  |
| SELK      | NM_021237.3 SELK      | 3 Homo sapiens HSPC297; MG     | 0.00077779 | 0.00270152 | 1.24681193  |
| C1orf52   | NM_198077.1 C1ORF52   | 1 Homo sapiens RP11-234D19.    | 0.00012208 | 0.00066435 | 1.24571612  |
| AFF4      | NM_014423.2 AFF4      | 5 Homo sapiens AF5Q31; MGC     | 0.016414   | 0.02958822 | 1.24500073  |
| ULK1      | XM_942125.1 ULK1      | PREDICTED: Homo sapiens u      | 0.0001555  | 0.0007938  | 1.24256291  |
| TRAPPC6B  | NM_00107953 TRAPPC6B  | 14 Homo sapiens trafficking TR | 0.00812754 | 0.01703242 | 1.24225374  |
| HIST1H2BK | NM_080593.1 HIST1H2BK | 6 Homo sapiens MGC131989; I    | 7.58E-06   | 9.24E-05   | 1.242197257 |
| LOC648399 | XM_926857.1 LOC648399 | PREDICTED: Homo sapiens s      | 0.00077875 | 0.00270399 | 1.24089433  |
| APAF1     | NM_181869.1 APAF1     | 12 Homo sapiens CED4; DKFZp    | 0.02046538 | 0.0350872  | 1.24089298  |
| SLC30A3   | NM_003459.4 SLC30A3   | 2 Homo sapiens ZNT3            | 2.88E-05   | 0.00024208 | 1.23975706  |
| KIAA0556  | NM_015202.1 KIAA0556  | 16 Homo sapiens KIAA0556 (KI   | 0.0097626  | 0.01970287 | 1.23949559  |
| PPP1R7    | NM_002712.1 PPP1R7    | 2 Homo sapiens SDS22           | 0.00607009 | 0.01349903 | 1.23816582  |
| PRKD2     | NM_016457.3 PRKD2     | 19 Homo sapiens HSPC187; PK    | 0.01613191 | 0.02920079 | 1.23807506  |
| FAM89B    | NM_152832.1 FAM89B    | 11 Homo sapiens MTRV1          | 2.27E-05   | 0.00020414 | 1.23774616  |
| C3orf31   | NM_138807.2 C3ORF31   | 3 Homo sapiens MGC16471; D     | 0.01366253 | 0.025614   | 1.2370609   |
| AGGF1     | NM_018046.3 AGGF1     | 5 Homo sapiens VG5Q; FLJ102    | 0.01563817 | 0.0284826  | 1.23661217  |
| CPSF3L    | NM_017871.3 CPSF3L    | 1 Homo sapiens RC68; RC-68;    | 0.00144622 | 0.00441257 | 1.23614578  |
| CYB5R4    | NM_016230.2 CYB5R4    | 6 Homo sapiens RP4-676J13.1    | 0.01173131 | 0.02277932 | 1.23397328  |
| EIF4G3    | NM_003760.2 EIF4G3    | 1 Homo sapiens EIF4GII         | 0.0026132  | 0.0095234  | 1.2338019   |
| CENTG2    | NM_014914.2 CENTG2    | 2 Homo sapiens GGAP1; MGC7     | 7.35E-05   | 0.00046603 | 1.23310663  |
| PIGF      | NM_173074.1 PIGF      | 2 Homo sapiens MGC32646; M     | 0.0072506  | 0.01553007 | 1.23302203  |
| STYXL1    | NM_016086.2 STYXL1    | 7 Homo sapiens MK-STYX; DU     | 0.0010026  | 0.00329589 | 1.23301696  |
| TOM1      | NM_005488.1 TOM1      | 22 Homo sapiens FLJ33404       | 0.01903314 | 0.03313877 | 1.23228562  |
| MTF2      | NM_007358.1 MTF2      | 1 Homo sapiens dJ976O13.2; F   | 0.00851579 | 0.01765877 | 1.2317048   |
| KIAA0090  | NM_015047.1 KIAA0090  | 1 Homo sapiens RP1-43E13.1     | 0.00040059 | 0.0016257  | 1.23118971  |
| SCOC      | NM_032547.1 SCOC      | 4 Homo sapiens HRIHFB2072;     | 0.00027547 | 0.0012185  | 1.23094918  |
| PMAIP1    | NM_021127.1 PMAIP1    | 18 Homo sapiens APR; NOXA      | 0.0002953  | 0.00128167 | 1.23081721  |
| PURB      | NM_033224.3 PURB      | 7 Homo sapiens MGC126786; I    | 0.0005038  | 0.00194298 | 1.23056609  |
| AP4E1     | NM_007347.3 AP4E1     | 15 Homo sapiens DKFZp686L12    | 0.02260112 | 0.03793497 | 1.22982318  |
| BICD2     | NM_00100380 BICD2     | 9 Homo sapiens bA526D8.1; K    | 0.01281139 | 0.02438427 | 1.22884212  |
| GATAD2B   | NM_020699.1 GATAD2B   | 1 Homo sapiens MGC138285; I    | 0.00616449 | 0.01366144 | 1.22778438  |
| POLG2     | NM_007215.2 POLG2     | 17 Homo sapiens POLB; MTPOLF   | 0.01390647 | 0.02596383 | 1.22776418  |
| C12orf5   | NM_020375.1 C12ORF5   | 12 Homo sapiens TIGAR          | 0.01905643 | 0.03314746 | 1.22715164  |
| CRIP1     | NM_014171.3 CRIP1     | 2 Homo sapiens HSPC139         | 3.35E-05   | 0.00026884 | 1.22440226  |
| L2HGDH    | NM_024884.1 L2HGDH    | 14 Homo sapiens FLJ12618; C1   | 0.01453712 | 0.02691014 | 1.22420152  |
| RAB11FIP5 | NM_015470.1 RAB11FIP5 | 2 Homo sapiens RIP11; pp75;    | 0.00013916 | 0.00072884 | 1.22405215  |
| CAMSAP1L1 | NM_203459.1 CAMSAP1L1 | 1 Homo sapiens KIAA1078; MC    | 0.01726928 | 0.0307022  | 1.22338269  |
| ITGB3BP   | NM_014288.3 ITGB3BP   | 1 Homo sapiens HSU37139; Cf    | 0.01455062 | 0.02693055 | 1.22291936  |
| ACTR1B    | NM_005735.2 ACTR1B    | 2 Homo sapiens CTRN2; ARP1E    | 0.00023494 | 0.00108055 | 1.22216162  |
| LHPP      | NM_022126.2 LHPP      | 10 Homo sapiens MGC142189; I   | 3.02E-05   | 0.00024976 | 1.22086815  |
| SUPT4H1   | NM_003168.1 SUPT4H1   | 17 Homo sapiens SPT4H; SUPT4   | 8.44E-05   | 0.00051353 | 1.22022195  |
| UTP14C    | NM_021645.4 UTP14C    | 13 Homo sapiens UTP14B; KIAA   | 0.00402257 | 0.0097236  | 1.21902501  |
| TM2D1     | NM_032027.2 TM2D1     | 1 Homo sapiens BBP             | 0.00010831 | 0.00061114 | 1.21887847  |
| VPS25     | NM_032353.2 VPS25     | 17 Homo sapiens MGC10540; F    | 0.00787112 | 0.01657817 | 1.21887788  |
| LMF2      | NM_033200.1 LMF2      | 22 Homo sapiens TMEM153; TM    | 0.00395428 | 0.00961412 | 1.21716964  |
|           | Hs.542428 HS.542428   | 20 xc76e10.x1 NCI_CGAP_Ov32    | 0.02015988 | 0.03465637 | 1.21666699  |
| ANKRD54   | NM_138797.1 ANKRD54   | 22 Homo sapiens ankyrin repeat | 0.00637284 | 0.01401174 | 1.21654377  |
| VRK1      | NM_003384.2 VRK1      | 14 Homo sapiens MGC142070; I   | 0.00064994 | 0.00236874 | 1.21619508  |
| TNFAIP8L1 | NM_152362.1 TNFAIP8L1 | 19 Homo sapiens MGC17791       | 0.02748033 | 0.04411465 | 1.21569741  |
| ACN9      | NM_020186.1 ACN9      | 7 Homo sapiens DC11            | 7.99E-05   | 0.00049449 | 1.21533822  |
| MFF       | NM_020194.4 MFF       | 2 Homo sapiens MGC110913; C    | 0.00193134 | 0.00549471 | 1.21431507  |
| C1orf122  | NM_198446.1 C1ORF122  | 1 Homo sapiens ALAESM; FLJ4    | 0.00104605 | 0.00341088 | 1.21219888  |

## 2.0 ACL-Dependent Upreg

|             |             |             |    |                           |                           |            |            |            |
|-------------|-------------|-------------|----|---------------------------|---------------------------|------------|------------|------------|
| WRB         | NM_004627.2 | WRB         | 21 | Homo sapiens              | CHD5                      | 0.00106179 | 0.00345185 | 1.21105418 |
| PGM3        | NM_015599.1 | PGM3        | 6  | Homo sapiens              | AGM1; PAGM;               | 0.00301733 | 0.00778175 | 1.21089348 |
| GPAM        | NM_020918.2 | GPAM        | 10 | Homo sapiens              | GPAT1; MGC2               | 0.00322846 | 0.00819405 | 1.21087972 |
| NKIRAS1     | NM_020345.3 | NKIRAS1     | 3  | Homo sapiens              | KBRAS1; kapp              | 0.00013038 | 0.00069701 | 1.21073002 |
| KIAA0913    | NM_015037.1 | KIAA0913    | 10 | Homo sapiens              | FLJ34302                  | 0.00012438 | 0.00067287 | 1.21019469 |
| TUBG2       | NM_016437.1 | TUBG2       | 17 | Homo sapiens              | MGC131994                 | 0.01131032 | 0.02212394 | 1.20781777 |
| BRD7P2      | XR_039198.1 | BRD7P2      |    |                           | PREDICTED: Homo sapiens n | 0.00283418 | 0.00740428 | 1.20750486 |
| NANS        | NM_018946.2 | NANS        | 9  | Homo sapiens              | SAS                       | 0.00120322 | 0.00380688 | 1.20650896 |
| TRIM66      | NM_014818.1 | TRIM66      | 11 | Homo sapiens              | tripartite motil          | 0.02198833 | 0.03711854 | 1.20609079 |
| MEF2D       | NM_005920.2 | MEF2D       | 1  | Homo sapiens              | DKFZp686I15.              | 0.00071854 | 0.00255618 | 1.20601636 |
| ZNF557      | NM_00104438 | ZNF557      | 19 | Homo sapiens              | MGC4054                   | 0.0255454  | 0.04177361 | 1.20553767 |
| LOC552889   | NM_00113626 | LOC552889   | 12 | Homo sapiens              | hypothetical p            | 0.0087303  | 0.01801079 | 1.20536037 |
| C14orf142   | NM_032490.3 | C14ORF142   | 14 | Homo sapiens              | MGC133207; I              | 0.0316102  | 0.04897215 | 1.20459373 |
| STT3B       | NM_178862.1 | STT3B       | 3  | Homo sapiens              | STT3-B; SIMP              | 0.01867032 | 0.03261154 | 1.20406478 |
| CABC1       | NM_020247.3 | CABC1       | 1  | Homo sapiens              | MGC4849; CO               | 0.00037434 | 0.00154337 | 1.20396387 |
| CCNC        | NM_00101339 | CCNC        | 6  | Homo sapiens              | CycC                      | 0.00010342 | 0.00059282 | 1.20375961 |
| LOC93622    | NM_138699.2 | LOC93622    |    |                           | PREDICTED: Homo sapiens h | 0.00577345 | 0.01295598 | 1.20218623 |
| LRRC58      | NM_00109967 | LRRC58      | 3  | Homo sapiens              | leucine rich re           | 0.00212474 | 0.00590277 | 1.20181585 |
| BIK         | NM_001197.3 | BIK         | 22 | Homo sapiens              | NBK; BIP1; BF             | 0.00323836 | 0.00820766 | 1.20050287 |
| RNF216      | NM_019011.4 | RNF216      | 7  | Homo sapiens              | ZIN; UBCE7IP              | 0.00707234 | 0.01522928 | 1.20045896 |
| CD46        | NM_172358.1 | CD46        | 1  | Homo sapiens              | TLX; MCP; TR/             | 0.00727034 | 0.015557   | 1.19911108 |
|             | Hs.279842   | HS.279842   | 1  | Homo sapiens              | HSPC157 prot              | 0.00744264 | 0.01586012 | 1.19890606 |
| TMEM9       | NM_016456.2 | TMEM9       | 1  | Homo sapiens              | TMEM9A                    | 0.00126846 | 0.00396938 | 1.19831834 |
| CBARA1      | NM_006077.1 | CBARA1      | 10 | Homo sapiens              | CALC; EFHA3;              | 0.02127175 | 0.03621262 | 1.19828135 |
| PPHLN1      | NM_201438.1 | PPHLN1      | 12 | Homo sapiens              | HSPC206; HSF              | 0.00205984 | 0.00577264 | 1.19796644 |
| AKAP11      | NM_016248.2 | AKAP11      | 13 | Homo sapiens              | PRKA11; AKAF              | 0.009013   | 0.01847827 | 1.19442176 |
| LRRC1       | NM_025168.1 | LRRC1       | 6  | Homo sapiens              | dJ523E19.1; L             | 0.01081521 | 0.02136308 | 1.19421132 |
| FAM188A     | NM_024948.2 | FAM188A     | 10 | Homo sapiens              | DERP5; MST1.              | 0.00013369 | 0.00070805 | 1.19333884 |
| TMEM42      | NM_144638.1 | TMEM42      | 3  | Homo sapiens              | MGC29956                  | 0.02469221 | 0.04067216 | 1.19257532 |
| ACAD8       | NM_014384.1 | ACAD8       | 11 | Homo sapiens              | ACAD-8                    | 0.01218251 | 0.02344184 | 1.19255651 |
| SDCBP       | NM_00100706 | SDCBP       | 8  | Homo sapiens              | MDA-9; SYCL;              | 0.00087629 | 0.00296498 | 1.19150824 |
| C4orf34     | NM_174921.1 | C4ORF34     | 4  | Homo sapiens              | FLJ13289                  | 3.31E-05   | 0.00026687 | 1.19116468 |
| MRPL10      | NM_145255.2 | MRPL10      | 17 | Homo sapiens              | MGC17973; RI              | 0.00093325 | 0.003116   | 1.1897294  |
| UBE4A       | NM_004788.2 | UBE4A       | 11 | Homo sapiens              | UFD2; KIAA01              | 0.00010728 | 0.00060817 | 1.18963545 |
| CORO1B      | NM_020441.2 | CORO1B      | 11 | Homo sapiens              | CORONIN-2; I              | 0.00497667 | 0.01152983 | 1.18939474 |
| ASB1        | NM_016114.3 | ASB1        | 2  | Homo sapiens              | MGC11165; KI              | 0.00725315 | 0.01553245 | 1.1883512  |
| WBP1        | NM_012477.2 | WBP1        | 2  | Homo sapiens              | MGC15305; W               | 0.00830248 | 0.0173222  | 1.18825215 |
| CCDC84      | NM_198489.1 | CCDC84      | 11 | Homo sapiens              | DLNB14                    | 0.00117394 | 0.00374147 | 1.18821543 |
| DFFA        | NM_004401.2 | DFFA        | 1  | Homo sapiens              | DFF-45; ICAD              | 0.00124554 | 0.00390552 | 1.18801058 |
| OSBPL2      | NM_144498.1 | OSBPL2      | 20 | Homo sapiens              | MGC4307; KIA              | 0.02370659 | 0.03941306 | 1.18729383 |
| FAM53C      | NM_016605.1 | FAM53C      | 5  | Homo sapiens              | C5orf6                    | 0.00011312 | 0.00062949 | 1.18566566 |
| HERPUD1     | NM_00101099 | HERPUD1     | 16 | Homo sapiens              | Mif1; SUP; HE             | 0.00011931 | 0.00065456 | 1.18559429 |
| LOC728602   | XR_039532.1 | LOC728602   |    |                           | PREDICTED: Homo sapiens n | 0.00966072 | 0.01954443 | 1.18482355 |
| LOC10013453 | XR_039501.1 | LOC10013453 | 7  | PREDICTED: Homo sapiens n |                           | 5.95E-05   | 0.000401   | 1.18458512 |
| C14orf109   | NM_015676.1 | C14ORF109   | 14 | Homo sapiens              | DKFZP564F11               | 0.00235261 | 0.00639844 | 1.18436702 |
| CCNH        | NM_001239.2 | CCNH        | 5  | Homo sapiens              | p34; CAK; p3;             | 0.01515628 | 0.02776309 | 1.18313387 |
| GMPPA       | NM_013335.2 | GMPPA       | 2  | Homo sapiens              | GDP-mannose               | 0.00044817 | 0.00177115 | 1.18290622 |
| HDHD1A      | NM_012080.3 | HDHD1A      |    |                           | Homo sapiens DXF68S1E; G  | 0.02235107 | 0.03762569 | 1.18288009 |
| LOC650832   | XM_939919.1 | LOC650832   |    |                           | PREDICTED: Homo sapiens s | 0.01108017 | 0.02177564 | 1.18230806 |
| C5orf37     | NM_152408.1 | C5ORF37     | 5  | Homo sapiens              | MGC120443; I              | 0.00191425 | 0.00545752 | 1.18224607 |
| RNF167      | NM_015528.1 | RNF167      | 17 | Homo sapiens              | 5730408C10R               | 0.00631673 | 0.01391654 | 1.18165266 |
| HOXA10      | NM_018951.2 | HOXA10      | 7  | Homo sapiens              | MGC12859; PI              | 0.01534188 | 0.02806051 | 1.18086959 |
| EIF2B3      | NM_020365.2 | EIF2B3      | 1  | Homo sapiens              | EIF-2B; EIF2B             | 0.01896648 | 0.03303858 | 1.18013662 |
| STAG3L2     | NM_00101373 | STAG3L2     | 7  | Homo sapiens              | MGC131759                 | 0.00391417 | 0.0095358  | 1.17951366 |
| GOLGA8B     | NM_00102356 | GOLGA8B     |    |                           | Homo sapiens KIAA0855; GC | 0.00037389 | 0.00154211 | 1.1790267  |
| UNC45A      | NM_017979.1 | UNC45A      | 15 | Homo sapiens              | FLJ10043; SM              | 0.00762746 | 0.01617784 | 1.17841427 |
| REEP6       | NM_138393.1 | REEP6       | 19 | Homo sapiens              | FLJ25383; DP              | 0.00067045 | 0.00241672 | 1.17753753 |
| ARIH1       | NM_005744.2 | ARIH1       | 15 | Homo sapiens              | ARI; HHARI; L             | 0.01948829 | 0.03376356 | 1.17749667 |
| KLHL9       | NM_018847.1 | KLHL9       | 9  | Homo sapiens              | RP11-380P16.              | 0.00074366 | 0.00262235 | 1.17660932 |
| LOC10013410 | XM_00171397 | LOC10013410 |    |                           | PREDICTED: Homo sapiens s | 0.00257542 | 0.00686694 | 1.17644559 |
| AKTIP       | NM_022476.2 | AKTIP       | 16 | Homo sapiens              | FTS; FT1                  | 0.00028818 | 0.00126032 | 1.17613152 |
| COG2        | NM_007357.1 | COG2        | 1  | Homo sapiens              | LDLC                      | 0.02530419 | 0.04145402 | 1.17554682 |
| PROCR       | NM_006404.3 | PROCR       | 20 | Homo sapiens              | CCCA; EPCR; I             | 0.00951212 | 0.01930489 | 1.17470002 |
| C4orf27     | NM_017867.1 | C4ORF27     | 4  | Homo sapiens              | FLJ20534                  | 0.00306322 | 0.00786093 | 1.17464049 |
| CMC1        | NM_182523.1 | CMC1        | 3  | Homo sapiens              | DKFZp779D08               | 0.00686357 | 0.0148978  | 1.17436425 |
| C1orf63     | NM_207035.1 | C1ORF63     | 1  | Homo sapiens              | RP3-465N24.4              | 0.00380845 | 0.00933475 | 1.17380433 |
| LOC10013178 | XR_039574.1 | LOC10013178 | 7  | PREDICTED: Homo sapiens n |                           | 0.01168918 | 0.02272594 | 1.1737666  |
| SPTAN1      | NM_003127.1 | SPTAN1      | 9  | Homo sapiens              | FLJ44613; (AL             | 0.00398965 | 0.00966983 | 1.17313397 |
| RAB11FIP2   | NM_014904.1 | RAB11FIP2   | 10 | Homo sapiens              | Rab11-FIP2; k             | 0.00781428 | 0.01648721 | 1.17300115 |
| ZWINT       | NM_00100541 | ZWINT       | 10 | Homo sapiens              | MGC117174; I              | 0.01711211 | 0.0305026  | 1.17124129 |

## 2.0 ACL-Dependent Upreg

|           |                       |                                  |            |            |            |
|-----------|-----------------------|----------------------------------|------------|------------|------------|
| PIP4K2A   | NM_005028.4 PIP4K2A   | 10 Homo sapiens PIP5KII-alpha;   | 4.33E-06   | 6.30E-05   | 1.17102948 |
| C5orf21   | NM_032042.3 CSORF21   | 5 Homo sapiens DKFZP564D17       | 0.00536842 | 0.01221351 | 1.16988943 |
| HSF2      | NM_004506.2 HSF2      | 6 Homo sapiens MGC117376; I      | 0.02065071 | 0.03533248 | 1.16988861 |
| C2orf44   | NM_025203.1 C2ORF44   | 2 Homo sapiens FLJ21945; PP:     | 0.00062995 | 0.00230903 | 1.16981835 |
| ZSWIM7    | NM_00104269 ZSWIM7    | 17 Homo sapiens SWS1             | 0.0231275  | 0.03863946 | 1.16939972 |
| DNAJB2    | NM_006736.5 DNAJB2    | 2 Homo sapiens HSPF3; HSJ1       | 0.00419082 | 0.01004319 | 1.16861699 |
| MYO9B     | NM_004145.2 MYO9B     | 19 Homo sapiens MYR5; CELIAC     | 0.00834019 | 0.01738085 | 1.16786972 |
| THOC2     | NM_020449.1 THOC2     | Homo sapiens CXorf3; dJ506       | 0.00565066 | 0.01272247 | 1.16774386 |
| LOC648852 | XM_940430.1 LOC648852 | PREDICTED: Homo sapiens h        | 0.00527142 | 0.01204327 | 1.1677301  |
| SPNS1     | NM_032038.1 SPNS1     | 16 Homo sapiens SPINL; FLJ383    | 0.00312999 | 0.00799829 | 1.16728478 |
| GDF15     | NM_004864.1 GDF15     | 19 Homo sapiens PTGFB; GDF-1     | 9.77E-06   | 0.0001096  | 1.16702898 |
| DGKQ      | NM_001347.2 DGKQ      | 4 Homo sapiens DAGK7; DAGK       | 0.00052997 | 0.00202023 | 1.16560771 |
| SDSL      | NM_138432.2 SDSL      | 12 Homo sapiens SDS-RS1          | 0.00713531 | 0.01534056 | 1.16503945 |
| PMM1      | NM_002676.1 PMM1      | 22 Homo sapiens Sec53            | 0.0013362  | 0.00413492 | 1.16450647 |
| HDAC3     | NM_003883.2 HDAC3     | 5 Homo sapiens RPD3; HD3; R      | 4.78E-05   | 0.00034785 | 1.16390005 |
| BIRC2     | NM_001166.3 BIRC2     | 11 Homo sapiens AP1; Hiap-2;     | 0.00671295 | 0.01464106 | 1.16369584 |
| ARPC4     | NM_005718.3 ARPC4     | 3 Homo sapiens ARC20; p20-A      | 0.0011881  | 0.0037711  | 1.16329368 |
| GLRX      | NM_002064.1 GLRX      | 5 Homo sapiens GRX; GRX1; M      | 4.13E-05   | 0.00031442 | 1.16280169 |
| SLC30A7   | NM_133496.3 SLC30A7   | 1 Homo sapiens ZnT-7; ZNT7;      | 0.00152307 | 0.00459671 | 1.16277682 |
| ENO2      | NM_001975.2 ENO2      | 12 Homo sapiens NSE              | 7.66E-05   | 0.00048009 | 1.16209643 |
| LMO4      | NM_006769.2 LMO4      | 1 Homo sapiens LIM domain or     | 0.00021249 | 0.00100581 | 1.16194977 |
| PDCD6IP   | NM_013374.3 PDCD6IP   | 3 Homo sapiens MGC17003; Al      | 0.02501141 | 0.04107964 | 1.16194584 |
| LOC728153 | XM_926814.1 LOC728153 | 5 PREDICTED: Homo sapiens s      | 0.03109321 | 0.04838502 | 1.16186007 |
| KLHDC5    | NM_020782.1 KLHDC5    | 12 Homo sapiens MGC131714; I     | 0.00073056 | 0.00258707 | 1.16179293 |
| PIGM      | NM_145167.1 PIGM      | 1 Homo sapiens MGC29896          | 0.01540947 | 0.02815096 | 1.16105883 |
| MCL1      | NM_021960.3 MCL1      | 1 Homo sapiens MCL1L; MGC1       | 0.00333678 | 0.00839835 | 1.16005817 |
| KIAA1751  | XM_933934.1 KIAA1751  | 1 PREDICTED: Homo sapiens K      | 0.00720957 | 0.01545437 | 1.15974143 |
| LMAN2L    | NM_030805.1 LMAN2L    | 2 Homo sapiens MGC11139; V       | 0.0004743  | 0.00185022 | 1.15948859 |
| PGS1      | NM_024419.3 PGS1      | 17 Homo sapiens DKFZP762M18      | 0.00051747 | 0.00197813 | 1.15948743 |
| UCHL3     | NM_006002.3 UCHL3     | 13 Homo sapiens UCH-L3           | 0.00074866 | 0.00263316 | 1.15912552 |
| ARL1      | NM_001177.3 ARL1      | 12 Homo sapiens ARFL1            | 0.00199204 | 0.00562618 | 1.15887767 |
| TSPYL1    | NM_003309.1 TSPYL1    | 6 Homo sapiens TSPYL             | 0.0001236  | 0.00066964 | 1.15861277 |
| HELZ      | NM_014877.2 HELZ      | 17 Homo sapiens FLJ2p586G19      | 0.0292227  | 0.04622886 | 1.15698895 |
| EXOC2     | NM_018303.4 EXOC2     | 6 Homo sapiens Sec5p; FLJ110     | 0.02479681 | 0.04081972 | 1.15679241 |
| DCAF7     | NM_005828.2 DCAF7     | 17 Homo sapiens AN11; HAN11      | 6.51E-05   | 0.00042972 | 1.15647822 |
| SLC39A3   | NM_213568.1 SLC39A3   | 19 Homo sapiens ZIP3             | 0.00625509 | 0.01381153 | 1.15592778 |
| EAPP      | NM_018453.3 EAPP      | 14 Homo sapiens FLJ20578; MG     | 0.00082392 | 0.0028265  | 1.15555705 |
| KATNA1    | NM_007044.2 KATNA1    | 6 Homo sapiens katanin p60 (A    | 0.01263736 | 0.02413334 | 1.15502362 |
|           | Hs.497591 HS.497591   | 14 Homo sapiens cDNA FLJ4184     | 0.01480396 | 0.02727402 | 1.15497054 |
| PEA15     | NM_003768.2 PEA15     | 1 Homo sapiens HUMMAT1H; P       | 0.00014468 | 0.00075379 | 1.15331249 |
| HNRNPH2   | NM_00103239 HNRNPH2   | Homo sapiens HNRPH1; FTP3        | 0.01767617 | 0.03125178 | 1.1528432  |
| MRPS31    | NM_005830.2 MRPS31    | 13 Homo sapiens MRP-S31; IMC     | 0.0024057  | 0.00651349 | 1.15273165 |
| MFAP1     | NM_005926.2 MFAP1     | 15 Homo sapiens microfibrillar-a | 0.00400213 | 0.00968495 | 1.15260919 |
| SLC4A5    | NM_133478.2 SLC4A5    | 2 Homo sapiens NBC4; MGC12       | 0.0202179  | 0.03473963 | 1.15149891 |
| MKRN2     | NM_014160.3 MKRN2     | 3 Homo sapiens HSCP070; RNF      | 0.00213035 | 0.00591383 | 1.15052773 |
| UNC84A    | NM_025154.2 UNC84A    | 7 Homo sapiens KIAA0810; SU      | 0.00116541 | 0.00372302 | 1.14994461 |
| BTG1      | NM_001731.1 BTG1      | 12 Homo sapiens B-cell transloc  | 9.30E-05   | 0.00054938 | 1.14955056 |
| STX2      | NM_001980.2 STX2      | 12 Homo sapiens MGC51014; S'     | 0.00266091 | 0.00705337 | 1.14937154 |
| HRASLS3   | NM_007069.1 HRASLS3   | 11 Homo sapiens HREV107-3; H     | 0.01009166 | 0.02022799 | 1.14917307 |
| PRKCSH    | NM_00100132 PRKCSH    | 19 Homo sapiens K19P1; AGE-R     | 0.00118741 | 0.00377112 | 1.14858168 |
| KATNB1    | NM_005886.1 KATNB1    | 16 Homo sapiens KAT              | 0.00214634 | 0.00595214 | 1.1468054  |
| BRP44     | NM_015415.1 BRP44     | 1 Homo sapiens MGC125752; I      | 0.00109308 | 0.00353559 | 1.14639231 |
| CDC7      | NM_003503.2 CDC7      | 1 Homo sapiens HsCDC7; MGC       | 0.0007237  | 0.00257033 | 1.1463311  |
| KBTBD11   | NM_014867.1 KBTBD11   | 8 Homo sapiens KIAA0711; KL      | 0.01043328 | 0.0207558  | 1.14583397 |
| STX5      | NM_003164.2 STX5      | 11 Homo sapiens STX5A; SED5      | 0.00185735 | 0.00533448 | 1.14559975 |
| DBNL      | NM_014063.5 DBNL      | 7 Homo sapiens SH3P7; HIP-5'     | 0.00019091 | 0.00092789 | 1.14539488 |
| WDR33     | NM_00100662 WDR33     | 2 Homo sapiens WDC146; FLJ1      | 0.02239664 | 0.03769072 | 1.14521597 |
| LOC730432 | XM_936257.1 LOC730432 | PREDICTED: Homo sapiens s        | 0.00045664 | 0.00179681 | 1.1448213  |
| STX6      | NM_005819.4 STX6      | 1 Homo sapiens syntaxin 6 (ST    | 0.00493091 | 0.01145312 | 1.14480629 |
| LOC646567 | XM_940087.1 LOC646567 | 1 PREDICTED: Homo sapiens s      | 0.00045162 | 0.0017822  | 1.14462999 |
| C2orf30   | NM_015701.2 C2ORF30   | 2 Homo sapiens CL24936; CL2      | 0.00545589 | 0.01237109 | 1.14460379 |
| HSD17B10  | NM_004493.2 HSD17B10  | Homo sapiens HCD2; ABAD;         | 0.01148923 | 0.0242948  | 1.14393676 |
| YIPF3     | NM_015388.2 YIPF3     | 6 Homo sapiens FinGER3; dJ33     | 0.00037497 | 0.0015454  | 1.14319436 |
| SH3GL1    | NM_003025.2 SH3GL1    | 19 Homo sapiens SH3P8; MGC1      | 0.03008467 | 0.04719403 | 1.14290009 |
| RNF123    | NM_022064.2 RNF123    | 3 Homo sapiens KPC1; DKFZp6      | 0.00461997 | 0.01087029 | 1.14250306 |
| CCDC45    | NM_138363.1 CCDC45    | 17 Homo sapiens DKFZp667E18      | 0.00651707 | 0.01428549 | 1.14187043 |
| LOC642333 | XM_939884.1 LOC642333 | PREDICTED: Homo sapiens s        | 0.0061304  | 0.01359421 | 1.14122899 |
| ZNF526    | NM_133444.1 ZNF526    | 19 Homo sapiens KIAA1951; MC     | 0.02993254 | 0.04702326 | 1.14116704 |
| DPM1      | NM_003859.1 DPM1      | 20 Homo sapiens MPDS; CDGIE      | 3.01E-05   | 0.00024969 | 1.14115909 |
| CHEK2     | NM_007194.3 CHEK2     | 22 Homo sapiens HuCds1; CHK2     | 0.030648   | 0.04787042 | 1.14094938 |

## 2.0 ACL-Dependent Upreg

|             |                                            |    |                                                          |                          |                          |                          |
|-------------|--------------------------------------------|----|----------------------------------------------------------|--------------------------|--------------------------|--------------------------|
| ATP6V1A     | NM_001690.2 ATP6V1A<br>Hs.579631 HS.579631 |    | 3 Homo sapiens VA68; Vma1;<br>19 AGENCOURT_10229596 NIH_ | 0.000133<br>9.43E-05     | 0.00070682<br>0.00055566 | 1.1406916<br>1.14067797  |
| FLJ40722    | XM_945696.1 FLJ40722                       |    | PREDICTED: Homo sapiens h                                | 0.020848                 | 0.03562517               | 1.14064692               |
| TMEM55B     | NM_144568.1 TMEM55B                        |    | 14 Homo sapiens DKFZp434M05                              | 0.00864809               | 0.01788194               | 1.1397438                |
| COPE        | NM_199444.1 COPE                           |    | 19 Homo sapiens FLJ13241; eps                            | 0.0001186                | 0.00065162               | 1.13933747               |
| EAF1        | NM_033083.5 EAF1                           |    | 3 Homo sapiens ELL associatec                            | 0.00866802               | 0.01791633               | 1.13886453               |
| RNF31       | NM_017999.3 RNF31                          |    | 14 Homo sapiens FLJ23501; MG                             | 0.02196127               | 0.03708438               | 1.13837305               |
| LOC644310   | XM_927480.1 LOC644310                      |    | PREDICTED: Homo sapiens s                                | 0.00833981               | 0.0173834                | 1.13817534               |
| ITGAV       | NM_002210.2 ITGAV                          |    | 2 Homo sapiens CD51; DKFZp                               | 0.0056591                | 0.0127362                | 1.1379286                |
| MAGEB6B     | XM_373340.1 MAGEB6B                        | X  | PREDICTED: Homo sapiens n                                | 0.00332732               | 0.00837649               | 1.13767304               |
| SWAP70      | NM_015055.1 SWAP70                         |    | 11 Homo sapiens HSPC321; FLJ                             | 0.00778587               | 0.01644962               | 1.13706968               |
| MRPS33      | NM_016071.2 MRPS33                         |    | 7 Homo sapiens FLJ21123; CG                              | 0.00158753               | 0.00474381               | 1.13688817               |
| GGCT        | NM_024051.2 GGCT                           |    | 7 Homo sapiens FLJ11717; MG                              | 0.00037661               | 0.00155038               | 1.13618368               |
| LOC10013366 | XM_00171361 LOC10013366                    |    | PREDICTED: Homo sapiens h                                | 0.00495498               | 0.0114992                | 1.13596075               |
| C2orf56     | NM_144736.3 C2ORF56                        |    | 2 Homo sapiens PRO1853                                   | 0.03137067               | 0.04868434               | 1.13557216               |
| ZSWIM1      | NM_080603.3 ZSWIM1                         |    | 20 Homo sapiens C2orf162                                 | 0.01743213               | 0.03092091               | 1.13504236               |
| ITM2B       | NM_021999.2 ITM2B                          |    | 13 Homo sapiens E3-16; BRICD                             | 0.00018229               | 0.00089845               | 1.13502726               |
| HSPC171     | NM_014187.1 HSPC171                        |    | Homo sapiens HSPC171 prot                                | 0.00417101               | 0.01000453               | 1.13460347               |
| BCDIN3D     | NM_181708.1 BCDIN3D                        |    | 12 Homo sapiens BCDIN3 doma                              | 0.02067029               | 0.03535485               | 1.13451092               |
| C19orf60    | NM_00110041C19ORF60                        |    | 19 Homo sapiens FLJ20850; FLJ                            | 0.00077554               | 0.00269456               | 1.13436751               |
| NECAP1      | NM_015509.2 NECAP1                         |    | 12 Homo sapiens DKFZP566B18                              | 0.00032286               | 0.00137817               | 1.13399284               |
| C14orf179   | NM_052873.1 C14ORF179                      |    | 14 Homo sapiens FLJ32173; MG                             | 0.02687092               | 0.04336697               | 1.13353863               |
| PGRMC2      | NM_006320.1 PGRMC2                         |    | 4 Homo sapiens DG6; PMBP                                 | 0.00137879               | 0.00424016               | 1.13326139               |
| C6orf173    | NM_00101250C6ORF173                        |    | 6 Homo sapiens DKFZp686L15                               | 0.00111667               | 0.00359479               | 1.13323736               |
| OCEL1       | NM_024578.1 OCEL1                          |    | 19 Homo sapiens S863-9; FLJ22                            | 0.00716728               | 0.01538798               | 1.13322298               |
| RNF126      | NM_194460.1 RNF126                         |    | 19 Homo sapiens MGC14317; M                              | 0.01737062               | 0.03083697               | 1.1324994                |
| SYAP1       | NM_032796.2 SYAP1                          | X  | Homo sapiens FLJ14495; DK                                | 0.00844188               | 0.01754568               | 1.13241402               |
| AP3D1       | NM_003938.4 AP3D1                          |    | 19 Homo sapiens hBLVR; ADTD                              | 0.00837004               | 0.01742302               | 1.13143856               |
| CLPTM1      | NM_001294.1 CLPTM1                         |    | 19 Homo sapiens cleft lip and p                          | 0.00023102               | 0.00106932               | 1.13106664               |
| LOC728499   | XM_928299.1 LOC728499                      |    | 5 PREDICTED: Homo sapiens s                              | 0.01015659               | 0.02033938               | 1.13066744               |
| C7orf26     | NM_024067.2 C7ORF26                        |    | 7 Homo sapiens MGC2718                                   | 0.00303981               | 0.00781933               | 1.12978727               |
| DENND5A     | NM_015213.2 DENND5A                        |    | 11 Homo sapiens FLJ33829; FLJ                            | 0.00487405               | 0.01136477               | 1.12973168               |
| MCOLN2      | NM_153259.2 MCOLN2                         |    | 1 Homo sapiens TRP-ML2; TRP                              | 0.00580226               | 0.01300454               | 1.12971389               |
| AP1G1       | NM_001128.5 AP1G1                          |    | 16 Homo sapiens MGC18255; AI                             | 0.03017171               | 0.04730326               | 1.12848151               |
| PSMC4       | NM_006503.2 PSMC4                          |    | 19 Homo sapiens MIP224; MGC                              | 0.00463527               | 0.01089684               | 1.1282691                |
| UBLCP1      | NM_145049.1 UBLCP1                         |    | 5 Homo sapiens MGC10067; FI                              | 0.00522212               | 0.01196585               | 1.12826749               |
| DCP2        | NM_152624.4 DCP2                           |    | 5 Homo sapiens NUDT20; FLJ3                              | 0.00049207               | 0.00190584               | 1.12720645               |
| TMEM118     | NM_032814.1 TMEM118<br>Hs.545976 HS.545976 | X  | Homo sapiens FLJ14627<br>xm52h06.x1 NCI_CGAP_GC6         | 0.00187348<br>0.02316693 | 0.00536803<br>0.03869938 | 1.12700892<br>1.12579133 |
| PI4K2B      | NM_018323.2 PI4K2B                         |    | 4 Homo sapiens FLJ11105; PIK                             | 0.03140908               | 0.04873003               | 1.125045                 |
| NDFIP2      | NM_019080.1 NDFIP2                         |    | 13 Homo sapiens FLJ25842; N4                             | 0.00021686               | 0.00102072               | 1.12495081               |
| LRPAP1      | NM_002337.1 LRPAP1                         |    | 4 Homo sapiens MGC138272; J                              | 0.00307918               | 0.00788886               | 1.12452443               |
| CHSY1       | NM_014918.3 CHSY1                          |    | 15 Homo sapiens CSS1; KIAA09                             | 0.00028745               | 0.00125816               | 1.1237411                |
| RTN4IP1     | NM_032730.3 RTN4IP1                        |    | 6 Homo sapiens NIMP; MGC12                               | 0.01295023               | 0.02457965               | 1.12365814               |
| OAT         | NM_000274.1 OAT                            |    | 10 Homo sapiens HOGA; DKFZp                              | 0.0001154                | 0.00063985               | 1.12331909               |
| LOC646966   | XR_038853.1 LOC646966                      |    | PREDICTED: Homo sapiens n                                | 0.00902166               | 0.01848557               | 1.12301604               |
| TMEM60      | NM_032936.2 TMEM60                         |    | 7 Homo sapiens MGC74482; C                               | 0.00117242               | 0.0037399                | 1.12259113               |
| SPPL2A      | NM_032802.2 SPPL2A                         |    | 15 Homo sapiens PSL2; IMP3                               | 0.00245873               | 0.00663065               | 1.12231602               |
| FRG1        | NM_004477.2 FRG1                           |    | 4 Homo sapiens FSG1; FRG1A                               | 0.00197031               | 0.00557784               | 1.12192969               |
| PLRG1       | NM_002669.2 PLRG1                          |    | 4 Homo sapiens MGC110980; I                              | 0.00030114               | 0.00130235               | 1.12159953               |
| CAPRIN2     | NM_023925.3 CAPRIN2                        |    | 12 Homo sapiens MGC134848; I                             | 0.0247597                | 0.04077098               | 1.12157366               |
| SRP54       | NM_003136.2 SRP54                          |    | 14 Homo sapiens signal recognit                          | 0.00024593               | 0.00111691               | 1.12013989               |
| M6PR        | NM_002355.2 M6PR                           |    | 12 Homo sapiens SMPR; FLJ329                             | 0.00960744               | 0.019462                 | 1.11903697               |
| ACTR1A      | NM_005736.2 ACTR1A                         |    | 10 Homo sapiens ARP1                                     | 0.00149611               | 0.00453676               | 1.1189017                |
| SIVA        | NM_006427.2 SIVA                           |    | 14 Homo sapiens CD27BP                                   | 3.18E-05                 | 0.00025936               | 1.11847663               |
| VAMP7       | NM_005638.3 VAMP7                          | XY | Homo sapiens TI-VAMP; VAM                                | 0.00934033               | 0.01902017               | 1.11838797               |
| COQ2        | NM_015697.5 COQ2                           |    | 4 Homo sapiens CL640; FLJ26                              | 0.01458619               | 0.02695964               | 1.11835755               |
| NPLOC4      | NM_017921.1 NPLOC4                         |    | 17 Homo sapiens FLJ20657; FLJ                            | 0.00467554               | 0.01097016               | 1.11829464               |
| TFB1M       | NM_016020.1 TFB1M                          |    | 6 Homo sapiens CGI75; mtTFB                              | 0.00598754               | 0.01334548               | 1.11828445               |
| MRPS11      | NM_176805.1 MRPS11                         |    | 15 Homo sapiens HCC-2; FLJ22                             | 0.00198328               | 0.0056058                | 1.1178573                |
| ATP1B1      | NM_00100178 ATP1B1                         |    | 1 Homo sapiens MGC1798; ATI                              | 0.00050417               | 0.00194233               | 1.11780239               |
| LOC10013464 | XM_00172468 LOC10013464                    |    | 7 PREDICTED: Homo sapiens s                              | 0.02656275               | 0.04298451               | 1.11763869               |
| FOXO3       | NM_001455.2 FOXO3                          |    | 6 Homo sapiens FOXO2; FKHR                               | 0.01164192               | 0.02266649               | 1.11700369               |
| CNIH        | NM_005776.2 CNIH                           |    | 14 Homo sapiens CNIH1; CNIL;                             | 0.00018743               | 0.00091508               | 1.11633703               |
| BCL2L12     | NM_052842.2 BCL2L12                        |    | 19 Homo sapiens MGC120315; I                             | 7.74E-05                 | 0.00048406               | 1.1163352                |
| YIF1A       | NM_020470.1 YIF1A                          |    | 11 Homo sapiens FinGER7; 54T                             | 0.01054913               | 0.02093643               | 1.11616509               |
| ARIH2       | NM_006321.1 ARIH2                          |    | 3 Homo sapiens FLJ10938; TRJ                             | 0.00030347               | 0.00131034               | 1.11559026               |
| KIAA0355    | NM_014686.2 KIAA0355                       |    | 19 Homo sapiens KIAA0355 (KI                             | 0.0314866                | 0.0488085                | 1.11530262               |
| LOC347376   | XM_937928.1 LOC347376                      |    | PREDICTED: Homo sapiens s                                | 0.01170062               | 0.02273192               | 1.11454241               |
| LOC389517   | NM_00103238 LOC389517                      |    | Homo sapiens similar to Willi                            | 0.00209119               | 0.00583195               | 1.11440177               |

## 2.0 ACL-Dependent Upreg

|               |             |               |    |                         |                |            |            |            |
|---------------|-------------|---------------|----|-------------------------|----------------|------------|------------|------------|
| RP11-529I10.1 | NM_015448.1 | RP11-529I10.1 | 10 | Homo sapiens            | DKFZP566F08    | 0.01212146 | 0.0233409  | 1.11426901 |
| ANKMY2        | NM_020319.1 | ANKMY2        | 7  | Homo sapiens            | DKFZP564O04    | 0.02158609 | 0.03660441 | 1.11402439 |
| C16orf80      | NM_013242.2 | C16ORF80      | 16 | Homo sapiens            | EVORF; GTL3    | 0.01002675 | 0.02013129 | 1.11387162 |
| ELP3          | NM_018091.3 | ELP3          | 8  | Homo sapiens            | FLJ10422; KAI1 | 0.0173474  | 0.0308058  | 1.11383359 |
| ZNF330        | NM_014487.2 | ZNF330        | 4  | Homo sapiens            | NOA36; HSA6    | 0.01792649 | 0.03162745 | 1.11342283 |
| RNGTT         | NM_003800.1 | RNGTT         | 6  | Homo sapiens            | HCE1; hCAP; (  | 0.00543611 | 0.01232881 | 1.1126038  |
| PMP22         | NM_153321.1 | PMP22         | 17 | Homo sapiens            | CMT1A; GAS-1   | 0.0083459  | 0.01738942 | 1.11228351 |
| GLA           | NM_000169.1 | GLA           |    | Homo sapiens            | GALA           | 0.00109863 | 0.00355144 | 1.11133838 |
| ZDHHC7        | NM_017740.1 | ZDHHC7        | 16 | Homo sapiens            | ZNF370; FLJ1   | 0.00053378 | 0.00202978 | 1.1111273  |
| BRD7          | NM_013263.2 | BRD7          | 16 | Homo sapiens            | CELTIX1; NAG   | 0.00552873 | 0.01249714 | 1.10956156 |
| DCTN5         | NM_032486.2 | DCTN5         | 16 | Homo sapiens            | MGC3248; p2    | 0.02548632 | 0.04170838 | 1.10928042 |
| TUSC4         | NM_006545.4 | TUSC4         | 3  | Homo sapiens            | NPR2L; NPRL2   | 0.00111535 | 0.00359158 | 1.10904703 |
| PRPF19        | NM_014502.3 | PRPF19        | 11 | Homo sapiens            | NMP200; PRP1   | 0.01874733 | 0.03270927 | 1.10894358 |
| TMEM14D       | XM_928242.2 | TMEM14D       | 10 | PREDICTED: Homo sapiens | tm14d          | 0.00023083 | 0.00106889 | 1.10838485 |
| CBWD5         | NM_00102491 | CBWD5         | 9  | Homo sapiens            | FLJ40320; DC   | 0.01889911 | 0.03293179 | 1.10818658 |
| BTAF1         | NM_003972.2 | BTAF1         | 10 | Homo sapiens            | BTAF172; KIAA  | 0.01939764 | 0.03364404 | 1.10800461 |
| LOC728324     | XR_015322.2 | LOC728324     |    | PREDICTED: Homo sapiens | n728324        | 0.00182064 | 0.00525824 | 1.10784138 |
| RAP2A         | NM_021033.4 | RAP2A         | 13 | Homo sapiens            | RAP2; K-REV;   | 0.00999778 | 0.02009912 | 1.10766847 |
| KRT10         | NM_000421.2 | KRT10         | 17 | Homo sapiens            | K10; KPP; CK1  | 0.0166831  | 0.02997387 | 1.10701099 |
| TMED9         | NM_017510.3 | TMED9         | 15 | Homo sapiens            | HSGP25L2G      | 0.00050391 | 0.00194271 | 1.10666257 |
| SERBP1        | NM_00101806 | SERBP1        | 1  | Homo sapiens            | CGI-55; FLJ9C  | 0.02058038 | 0.03525099 | 1.10589446 |
| G6PD          | NM_000402.2 | G6PD          |    | Homo sapiens            | G6PD1          | 0.0185051  | 0.03239064 | 1.10569747 |
| LOC727808     | XR_041978.1 | LOC727808     |    | PREDICTED: Homo sapiens | h727808        | 0.02684969 | 0.04334558 | 1.10494414 |
| LOC644330     | XM_946163.1 | LOC644330     | 19 | PREDICTED: Homo sapiens | s644330        | 0.01091523 | 0.02151763 | 1.10445345 |
| CSNK1E        | NM_001894.4 | CSNK1E        | 22 | Homo sapiens            | MGC10398; H    | 0.02908739 | 0.04608189 | 1.10424218 |
| RAD51C        | NM_058216.1 | RAD51C        | 17 | Homo sapiens            | MGC104277; I   | 0.00105416 | 0.00343217 | 1.10419877 |
| CXXC1         | NM_014593.2 | CXXC1         | 18 | Homo sapiens            | SPP1; HsT264   | 0.00141448 | 0.00433518 | 1.10387526 |
| PNPLA6        | NM_006702.2 | PNPLA6        | 19 | Homo sapiens            | sws; NTE       | 0.00490576 | 0.01141177 | 1.10337657 |
| OCRL          | NM_001587.3 | OCRL          |    | Homo sapiens            | NPHL2; OCRL1   | 0.02295206 | 0.03839947 | 1.10223763 |
| CCBE1         | NM_133459.1 | CCBE1         | 18 | Homo sapiens            | FLJ30681; MG   | 0.00889467 | 0.0182805  | 1.10204469 |
| PRIM1         | NM_000946.2 | PRIM1         | 12 | Homo sapiens            | MGC12308; p    | 0.00122036 | 0.00384766 | 1.10191497 |
| LOC10013430   | XM_00172073 | LOC100134304  |    | PREDICTED: Homo sapiens | s100134304     | 0.00161187 | 0.00479939 | 1.10184675 |
| ANKIB1        | NM_019004.1 | ANKIB1        | 7  | Homo sapiens            | DKFZP434A02    | 0.01477489 | 0.02723431 | 1.10148872 |
| FGFRL1        | NM_00100435 | FGFRL1        | 4  | Homo sapiens            | FGFR5; FHFR    | 0.03199761 | 0.04948065 | 1.10130464 |
| DYNLT1        | NM_006519.1 | DYNLT1        | 6  | Homo sapiens            | tctex-1; CW-1  | 4.03E-05   | 0.0003079  | 1.10040298 |
| GAPVD1        | NM_015635.2 | GAPVD1        | 9  | Homo sapiens            | MGC138848; I   | 0.01227235 | 0.02357297 | 1.09956153 |
| C3orf26       | NM_032359.2 | C3ORF26       | 3  | Homo sapiens            | MGC4308        | 0.00683507 | 0.01485076 | 1.09915093 |
| TNFRSF12A     | NM_016639.1 | TNFRSF12A     | 16 | Homo sapiens            | CD266; TWEA    | 0.00308847 | 0.00790707 | 1.09852594 |
| SERTAD1       | NM_013376.1 | SERTAD1       | 19 | Homo sapiens            | TRIP-Br1; SEI  | 0.00516348 | 0.01185648 | 1.09806015 |
| TAF10         | NM_006284.2 | TAF10         | 11 | Homo sapiens            | TAF2H; TAF2A   | 0.00217522 | 0.00600311 | 1.09774745 |
| R3HCC1        | XM_114618.6 | R3HCC1        |    | PREDICTED: Homo sapiens | R3HCC1         | 0.01337366 | 0.02519851 | 1.09698657 |
| PHPT1         | NM_014172.2 | PHPT1         | 9  | Homo sapiens            | bA216L13.10;   | 0.01629669 | 0.02943534 | 1.09633259 |
| CD81          | NM_004356.3 | CD81          | 11 | Homo sapiens            | S5.7; TAPA1;   | 0.00022884 | 0.00106104 | 1.09600019 |
| RAB3IP        | NM_175624.1 | RAB3IP        | 12 | Homo sapiens            | MGC71495; R    | 0.00767916 | 0.01626211 | 1.09488921 |
| HLA-E         | NM_005516.4 | HLA-E         | 6  | Homo sapiens            | DKFZp686P19    | 0.01196046 | 0.02312512 | 1.0946491  |
| LASS6         | NM_203463.1 | LASS6         | 2  | Homo sapiens            | CerS6; MGC12   | 0.00029231 | 0.00127175 | 1.09406565 |
| G3BP2         | NM_012297.3 | G3BP2         | 4  | Homo sapiens            | GTPase activat | 0.0120278  | 0.0232264  | 1.09364577 |
| FEZ2          | NM_005102.2 | FEZ2          | 2  | Homo sapiens            | MGC117372; I   | 0.00285154 | 0.00744428 | 1.09358565 |
| COPA          | NM_004371.2 | COPA          | 1  | Homo sapiens            | FLJ26320; HEI  | 0.00112017 | 0.00360389 | 1.09301466 |
| THEM2         | NM_018473.2 | THEM2         | 6  | Homo sapiens            | HT012; PNAS-   | 0.01157951 | 0.02256115 | 1.0930051  |
| CDCA4         | NM_017955.2 | CDCA4         | 14 | Homo sapiens            | MGC19517; FI   | 0.00793593 | 0.01667589 | 1.09277591 |
| H3F3B         | NM_005324.3 | H3F3B         | 17 | Homo sapiens            | H3F3A; H3.3B   | 0.00060675 | 0.00225365 | 1.09174355 |
| KLHL8         | NM_020803.3 | KLHL8         | 4  | Homo sapiens            | FLJ46304; KIA  | 0.01886959 | 0.03290144 | 1.09125881 |
| LRPPRC        | NM_133259.2 | LRPPRC        | 2  | Homo sapiens            | GP130; CLON    | 0.02523635 | 0.04136782 | 1.09024592 |
| CGGBP1        | NM_003663.3 | CGGBP1        | 3  | Homo sapiens            | CGGBP; p20-C   | 0.008355   | 0.01739838 | 1.08984115 |
| RAB2B         | NM_032846.2 | RAB2B         | 14 | Homo sapiens            | FLJ14824       | 0.00426114 | 0.01017357 | 1.08949344 |
| RARS          | NM_002887.3 | RARS          | 5  | Homo sapiens            | ArgRS; DALRC   | 0.00048601 | 0.00188573 | 1.08925876 |
| FNBP1         | NM_015033.2 | FNBP1         | 9  | Homo sapiens            | FBP17; MGC12   | 0.01261355 | 0.02409634 | 1.08913095 |
| POLB          | NM_002690.1 | POLB          | 8  | Homo sapiens            | MGC125976      | 0.00407787 | 0.0098245  | 1.08828576 |
| EFHA1         | NM_152726.1 | EFHA1         | 13 | Homo sapiens            | FLJ34588; FLJ  | 0.00114975 | 0.00368381 | 1.08824951 |
| CCNF          | NM_001761.1 | CCNF          | 16 | Homo sapiens            | FBX1; FBXO1    | 0.00627081 | 0.01384343 | 1.08696355 |
| TRAPPC4       | NM_016146.1 | TRAPPC4       | 11 | Homo sapiens            | SBDN; CGI-10   | 0.01767075 | 0.03124727 | 1.0869418  |
| C19orf53      | NM_014047.1 | C19ORF53      | 19 | Homo sapiens            | HSPC023        | 0.00065068 | 0.00236983 | 1.08663254 |
| LOC644774     | XM_927868.1 | LOC644774     |    | PREDICTED: Homo sapiens | s644774        | 0.02686525 | 0.04336425 | 1.08562401 |
| COX7A2L       | NM_004718.2 | COX7A2L       | 2  | Homo sapiens            | EB1; COX7RP;   | 0.00030108 | 0.0013026  | 1.08515653 |
| C15orf24      | NM_020154.2 | C15ORF24      | 15 | Homo sapiens            | C11orf3; HT02  | 0.00176184 | 0.00514169 | 1.08459624 |
| C18orf8       | NM_013326.2 | C18ORF8       | 18 | Homo sapiens            | HsT2591; MIC   | 0.00467176 | 0.01096365 | 1.08421326 |
| ACBD3         | NM_022735.3 | ACBD3         | 1  | Homo sapiens            | GOLPH1; PAP7   | 0.00673542 | 0.01467533 | 1.08402387 |
| POFUT1        | NM_015352.1 | POFUT1        | 20 | Homo sapiens            | O-Fuc-T; O-FU  | 0.0213496  | 0.03631672 | 1.08389239 |
| RNF181        | NM_016494.3 | RNF181        | 2  | Homo sapiens            | HSPC238        | 0.00130618 | 0.00405819 | 1.08374212 |



## 2.0 ACL-Dependent Upreg

|             |              |             |    |                           |                 |            |            |            |
|-------------|--------------|-------------|----|---------------------------|-----------------|------------|------------|------------|
| CHP         | NM_007236.3  | CHP         | 15 | Homo sapiens              | SLC9A1BP        | 0.0013653  | 0.00420701 | 1.08193798 |
| LOC10013254 | XR_039468.1  | LOC10013254 | 12 | PREDICTED: Homo sapiens n |                 | 0.02193039 | 0.03704374 | 1.08125047 |
| HNRNPA0     | NM_006805.3  | HNRNPA0     | 5  | Homo sapiens              | hnrNPA0         | 0.01675092 | 0.03007085 | 1.08105974 |
| SUCLG1      | NM_003849.1  | SUCLG1      | 2  | Homo sapiens              | FLJ21114; SU    | 0.00178109 | 0.00517839 | 1.08057242 |
| MYL12A      | NM_006471.2  | MYL12A      | 18 | Homo sapiens              | MLCB; MRLC3     | 0.00054432 | 0.00206264 | 1.08049457 |
| UTP6        | NM_018428.2  | UTP6        | 17 | Homo sapiens              | HCA66; C17or    | 0.00403296 | 0.00974221 | 1.08027346 |
| LOC647673   | XM_936731.1  | LOC647673   |    | PREDICTED: Homo sapiens s |                 | 0.00193102 | 0.00549523 | 1.08023453 |
| ALCAM       | NM_001627.2  | ALCAM       | 3  | Homo sapiens              | CD166; FLJ38    | 0.01386212 | 0.02588994 | 1.08022312 |
| VPS37C      | NM_017966.4  | VPS37C      | 11 | Homo sapiens              | FLJ20847        | 0.00682119 | 0.01483544 | 1.08017808 |
| PDXP        | NM_020315.3  | PDXP        | 22 | Homo sapiens              | CIN; FLJ3270    | 0.00192236 | 0.00547634 | 1.08012136 |
| LOC10013093 | XM_00172657  | LOC10013093 |    | PREDICTED: Homo sapiens s |                 | 0.0138317  | 0.02585534 | 1.0800607  |
| DAP3        | NM_001867.1  | DAP3        | 1  | Homo sapiens              | MGC126059; I    | 0.00224761 | 0.00616066 | 1.07984405 |
| SAPS3       | NM_018312.3  | SAPS3       | 11 | Homo sapiens              | MGC125712; S    | 0.00683081 | 0.01485041 | 1.07877744 |
| CD2BP2      | NM_006110.1  | CD2BP2      | 16 | Homo sapiens              | FWP010; LIN1    | 0.00785194 | 0.01654418 | 1.07869169 |
| WDYHV1      | NM_018024.1  | WDYHV1      | 8  | Homo sapiens              | FLJ10204        | 0.02822163 | 0.04504519 | 1.07837922 |
| MMGT1       | XM_932381.1  | MMGT1       |    | Homo sapiens              | membrane ma     | 0.01156092 | 0.02253706 | 1.07720216 |
| RPUSD3      | NM_0173659.2 | RPUSD3      | 3  | Homo sapiens              | FLJ34707; MG    | 0.01815265 | 0.03190217 | 1.07696426 |
| CCNK        | NM_003858.2  | CCNK        | 14 | Homo sapiens              | CPR4; MGC91     | 0.01958601 | 0.03388963 | 1.0766535  |
| LOC10013171 | XR_038705.1  | LOC10013171 |    | PREDICTED: Homo sapiens n |                 | 0.02495298 | 0.04100847 | 1.07584356 |
| COX7C       | NM_001867.1  | COX7C       | 5  | Homo sapiens              | cytochrome c    | 0.00163226 | 0.00484815 | 1.07577668 |
| LOC654121   | XM_942442.1  | LOC654121   |    | PREDICTED: Homo sapiens s |                 | 0.00227132 | 0.00621625 | 1.07539836 |
| TMEM9B      | NM_020644.1  | TMEM9B      | 11 | Homo sapiens              | C11orf15        | 0.01781215 | 0.03145125 | 1.07524954 |
| NDUFA8      | NM_014222.2  | NDUFA8      | 9  | Homo sapiens              | CI-19KD; PGI    | 0.00036953 | 0.00153052 | 1.07507377 |
| LOC401206   | XM_376420.3  | LOC401206   | 5  | PREDICTED: Homo sapiens s |                 | 0.01402077 | 0.02613683 | 1.0743299  |
| RAB5B       | NM_002868.2  | RAB5B       | 12 | Homo sapiens              | RAB5B, memb     | 0.00940153 | 0.01910901 | 1.07406218 |
| C21orf55    | NM_017833.2  | C21ORF55    | 21 | Homo sapiens              | C21orf78        | 0.01404674 | 0.02617177 | 1.07346626 |
| TMEM181     | XM_941693.1  | TMEM181     | 6  | Homo sapiens              | KIAA1423; GP    | 0.00816446 | 0.01708673 | 1.07229477 |
| ZDHHC8      | NM_013373.2  | ZDHHC8      | 22 | Homo sapiens              | ZNF378; ZDHI    | 0.00294582 | 0.00764086 | 1.0722763  |
| MBTPS1      | NM_201268.1  | MBTPS1      | 16 | Homo sapiens              | MGC138712; I    | 0.01802105 | 0.03174789 | 1.07217133 |
| TMEM14A     | NM_014051.2  | TMEM14A     | 6  | Homo sapiens              | C6orf73; PTDC   | 0.00434085 | 0.01032756 | 1.07184933 |
| ASCC2       | NM_032204.3  | ASCC2       | 22 | Homo sapiens              | ASC1p100        | 0.02908651 | 0.04608721 | 1.07160642 |
| TOMM70A     | NM_014820.3  | TOMM70A     | 3  | Homo sapiens              | FLJ90470        | 0.01993132 | 0.03437765 | 1.07146474 |
| LOC10012808 | XM_00171979  | LOC10012808 |    | PREDICTED: Homo sapiens h |                 | 0.01405335 | 0.0261796  | 1.07108262 |
| LOC10013030 | XR_036947.1  | LOC10013030 |    | PREDICTED: Homo sapiens n |                 | 0.02502161 | 0.04108399 | 1.07008754 |
| LOC255167   | NR_024424.1  | LOC255167   | 5  | Homo sapiens              | hypothetical L  | 0.01907644 | 0.03316103 | 1.06983326 |
| KCNH6       | NM_030779.2  | KCNH6       | 17 | Homo sapiens              | HERG2; ERG2     | 0.007989   | 0.01676148 | 1.06939771 |
| OSTC        | NM_021227.2  | OSTC        | 4  | Homo sapiens              | oligosaccharyl  | 0.00140389 | 0.00431002 | 1.06864128 |
| RALA        | NM_005402.2  | RALA        | 7  | Homo sapiens              | MGC48949; R     | 0.00591629 | 0.01321105 | 1.06832988 |
| SLC30A9     | NM_006345.3  | SLC30A9     | 4  | Homo sapiens              | C4orf1; HUEL    | 0.01199305 | 0.02317575 | 1.06796881 |
| ETFA        | NM_000126.1  | ETFA        | 15 | Homo sapiens              | GAG2; MADD; E   | 0.00651169 | 0.01427946 | 1.06765879 |
| BUD31       | NM_003910.2  | BUD31       | 7  | Homo sapiens              | MGC111202; `    | 0.00460648 | 0.01085263 | 1.06751516 |
| GOT1        | NM_002079.1  | GOT1        | 10 | Homo sapiens              | GIG18           | 0.00282443 | 0.00738592 | 1.06681783 |
| MRPL17      | NM_022061.2  | MRPL17      | 11 | Homo sapiens              | RPML26; MRP-    | 0.00952684 | 0.01932395 | 1.06670347 |
| UBXN1       | NM_015853.3  | UBXN1       | 11 | Homo sapiens              | 2B28            | 0.00718425 | 0.01541833 | 1.06666194 |
| KLHDC3      | NM_057161.2  | KLHDC3      | 6  | Homo sapiens              | RP1-20C7.3; t   | 0.02191241 | 0.03702489 | 1.06662515 |
| DHCR24      | NM_014762.2  | DHCR24      | 1  | Homo sapiens              | Nbla03646; se   | 0.02897393 | 0.04594902 | 1.06614878 |
| RPS28       | NM_001031.4  | RPS28       | 19 | Homo sapiens              | ribosomal prot  | 0.00018254 | 0.00089808 | 1.06467517 |
| ARF4        | NM_001660.2  | ARF4        | 3  | Homo sapiens              | ARF2            | 0.0043289  | 0.01030365 | 1.0646237  |
| PGRMC1      | NM_006667.2  | PGRMC1      |    | Homo sapiens              | HPR6.6; MPR     | 0.00772477 | 0.01633641 | 1.06413575 |
| IL18        | NM_001562.2  | IL18        | 11 | Homo sapiens              | MGC12320; IL    | 0.00690207 | 0.01496045 | 1.06391629 |
| LOC90586    | XR_000544.1  | LOC90586    | 17 | PREDICTED: Homo sapiens A |                 | 0.0296071  | 0.04664685 | 1.06308904 |
| YWHAB       | NM_139323.2  | YWHAB       | 20 | Homo sapiens              | KCIP-1; HS1     | 0.00439646 | 0.0104393  | 1.06303605 |
| EIF2B2      | NM_014239.2  | EIF2B2      | 14 | Homo sapiens              | EIF-2Bbeta; E   | 0.02815325 | 0.04498229 | 1.06281011 |
| SPOP        | NM_00100722  | SPOP        | 17 | Homo sapiens              | TEF2            | 0.01248976 | 0.02391029 | 1.06244346 |
| SCAP        | NM_012235.2  | SCAP        | 3  | Homo sapiens              | KIAA0199        | 0.01286355 | 0.02445357 | 1.06181606 |
| PFDN6       | NM_014260.2  | PFDN6       | 6  | Homo sapiens              | HKE2; PFD6; I   | 0.01455606 | 0.02693602 | 1.06130862 |
| ADIPOR1     | NM_015999.2  | ADIPOR1     | 1  | Homo sapiens              | ACDCR1; TESI    | 0.01255265 | 0.02399686 | 1.06099887 |
| C7orf30     | NM_138446.1  | C7ORF30     | 7  | Homo sapiens              | chromosome 7    | 0.00685079 | 0.01487896 | 1.06080655 |
| MIR1978     | NR_031742.1  | MIR1978     |    | Homo sapiens              | microRNA 197    | 0.00357951 | 0.00889597 | 1.06031774 |
| MMADHC      | NM_015702.2  | MMADHC      | 2  | Homo sapiens              | methylmalonic   | 0.02120818 | 0.03612137 | 1.06011511 |
| PGK1        | NM_000291.2  | PGK1        |    | Homo sapiens              | MGC117307; I    | 0.00741419 | 0.01581811 | 1.06006824 |
| POLR1D      | NM_015972.1  | POLR1D      | 13 | Homo sapiens              | MGC9850; RP     | 0.00555588 | 0.01255067 | 1.05995458 |
| LOC730187   | XR_042419.1  | LOC730187   |    | PREDICTED: Homo sapiens n |                 | 0.00306292 | 0.00786202 | 1.05968165 |
| ANKRD30B    | NM_00102986  | ANKRD30B    | 18 | Homo sapiens              | NY-BR-1.1       | 0.02427962 | 0.04018134 | 1.05941043 |
| LOC10013436 | XM_00171381  | LOC10013436 |    | PREDICTED: Homo sapiens h |                 | 0.00833658 | 0.01738    | 1.0589539  |
| RPL38       | NM_00103525  | RPL38       | 17 | Homo sapiens              | ribosomal rpl38 | 0.00326336 | 0.00825564 | 1.05872638 |
| PRDX2       | NM_181738.1  | PRDX2       | 19 | Homo sapiens              | TDPX1; MGC4     | 0.02105008 | 0.03590273 | 1.05852652 |
| ODC1        | NM_002539.1  | ODC1        | 2  | Homo sapiens              | ornithine deca  | 0.00397998 | 0.00965284 | 1.05810539 |
| CD151       | NM_004357.3  | CD151       | 11 | Homo sapiens              | TSPAN24; MEF    | 0.02655903 | 0.0429849  | 1.05723587 |
| COX7A2      | NM_001865.2  | COX7A2      | 6  | Homo sapiens              | MGC118950; I    | 0.00339085 | 0.00850489 | 1.05706505 |

## 2.0 ACL-Dependent Upreg

|           |             |           |    |                             |            |            |            |
|-----------|-------------|-----------|----|-----------------------------|------------|------------|------------|
| ARF1      | NM_00102422 | ARF1      | 1  | Homo sapiens ADP-ribosylati | 0.01927261 | 0.03348061 | 1.05698267 |
| CREB1     | NM_134442.2 | CREB1     | 2  | Homo sapiens MGC9284; CR    | 0.00837235 | 0.01742449 | 1.05690652 |
| LOC650276 | XM_939363.1 | LOC650276 |    | PREDICTED: Homo sapiens     | 0.00511608 | 0.01177252 | 1.05647097 |
| COX17     | NM_005694.1 | COX17     | 3  | Homo sapiens MGC117386; I   | 0.00157051 | 0.00470719 | 1.05592005 |
| ATP6V1F   | NM_004231.2 | ATP6V1F   | 7  | Homo sapiens Vma7; MGC12    | 0.00419107 | 0.01004157 | 1.05580451 |
| CALM2     | NM_001743.3 | CALM2     | 2  | Homo sapiens PHKD; CAMII;   | 0.00155074 | 0.00466208 | 1.05516852 |
| RHEB      | NM_005614.2 | RHEB      | 7  | Homo sapiens MGC111559; I   | 0.01684431 | 0.03016377 | 1.05503308 |
| LOC390466 | XM_372521.1 | LOC390466 | 14 | PREDICTED: Homo sapiens s   | 0.00601276 | 0.01338522 | 1.05503177 |
| ARL6IP1   | NM_015161.1 | ARL6IP1   | 16 | Homo sapiens ARMER; AIP1;   | 0.0079675  | 0.01672929 | 1.0548774  |
| SEPW1     | NM_003009.2 | SEPW1     | 19 | Homo sapiens selW           | 0.01690378 | 0.03022047 | 1.05413509 |
| ARPC5     | NM_005717.2 | ARPC5     | 1  | Homo sapiens ARC16; dJ127   | 0.01254857 | 0.02399751 | 1.05387428 |
| FAM98A    | NM_015475.3 | FAM98A    | 2  | Homo sapiens DKFZp686O03    | 0.01933291 | 0.03355319 | 1.05305721 |
| CHCHD9    | XM_928381.1 | CHCHD9    | 9  | PREDICTED: Homo sapiens c   | 0.01051361 | 0.0208812  | 1.0528787  |
| LOC642975 | XR_036988.1 | LOC642975 |    | PREDICTED: Homo sapiens n   | 0.02058845 | 0.03524261 | 1.0528017  |
| DYNC1LI2  | NM_006141.2 | DYNC1LI2  | 16 | Homo sapiens DNCL12; LIC2   | 0.02267216 | 0.03801898 | 1.05261997 |
| ARPC3     | NM_005719.2 | ARPC3     | 12 | Homo sapiens p21-Arc; ARC2  | 0.0276091  | 0.04428214 | 1.05246151 |
| ALKBH5    | NM_017758.2 | ALKBH5    | 17 | Homo sapiens OFOX1; OFO     | 0.0037085  | 0.00917041 | 1.05202096 |
| ROBLD3    | NM_014017.2 | ROBLD3    |    | Homo sapiens roadblock dor  | 0.01685688 | 0.03017138 | 1.05177699 |
| TM9SF2    | NM_004800.1 | TM9SF2    | 13 | Homo sapiens P76; MGC117:   | 0.02219019 | 0.03741861 | 1.05155928 |
| POLR2H    | NM_006232.2 | POLR2H    | 3  | Homo sapiens RPB17; hsRPB   | 0.00255436 | 0.00682083 | 1.05102748 |
| XPNPEP3   | NM_022098.2 | XPNPEP3   | 22 | Homo sapiens APP3           | 0.02447373 | 0.04040415 | 1.05050636 |
| ATP6V1G1  | NM_004888.2 | ATP6V1G1  | 9  | Homo sapiens Vma10; ATP6J   | 0.02443148 | 0.04034666 | 1.05033197 |
| PKM2      | NM_002654.3 | PKM2      | 15 | Homo sapiens OIP3; TCB; PK  | 0.01811443 | 0.03186592 | 1.050203   |
| WBP5      | NM_00100661 | WBP5      |    | Homo sapiens DKFZp313K19    | 0.01889301 | 0.03292644 | 1.04998975 |
| ENY2      | NM_020189.4 | ENY2      | 8  | Homo sapiens DC6; FLJ2048   | 0.00788939 | 0.01660055 | 1.0498184  |
| LOC646630 | XM_929572.1 | LOC646630 | 13 | PREDICTED: Homo sapiens s   | 0.03022963 | 0.04735989 | 1.04960188 |
| C16orf61  | NM_020188.2 | C16orf61  | 16 | Homo sapiens DC13; 231006   | 0.00967829 | 0.01957269 | 1.04855981 |
| TCEB1     | NM_005648.2 | TCEB1     | 8  | Homo sapiens SIII           | 0.01104543 | 0.02173095 | 1.04844086 |
| BCAP31    | NM_005745.6 | BCAP31    |    | Homo sapiens DXS1357E; 6C   | 0.01854605 | 0.03244414 | 1.04822538 |
| DCTN2     | NM_006400.3 | DCTN2     | 12 | Homo sapiens DCTN50; RBP1   | 0.02448128 | 0.04041047 | 1.04772306 |
| NDUFA3    | NM_004542.1 | NDUFA3    | 19 | Homo sapiens B9             | 0.01664588 | 0.02992184 | 1.04689779 |
| C8orf59   | XM_929832.1 | C8orf59   | 8  | Homo sapiens chromosome 8   | 0.00281001 | 0.00735885 | 1.04672082 |
| ID1       | NM_181353.3 | ID1       | 20 | Homo sapiens ID             | 0.01001087 | 0.02011427 | 1.04649623 |
| SLC16A3   | NM_004207.2 | SLC16A3   | 17 | Homo sapiens MCT3; MGC13    | 0.02503986 | 0.04109532 | 1.04636396 |
| MAGEB2    | NM_002364.3 | MAGEB2    |    | Homo sapiens MAGE-XP-2; M   | 0.02210164 | 0.03729243 | 1.04634947 |
| RPL27     | NM_000988.2 | RPL27     | 17 | Homo sapiens ribosomal prot | 0.01440746 | 0.0267293  | 1.04617894 |
| EIF3H     | NM_003756.1 | EIF3H     | 8  | Homo sapiens EIF3S3; eIF3h  | 0.01209874 | 0.0233054  | 1.04573808 |
| P4HB      | NM_000918.2 | P4HB      | 17 | Homo sapiens GIT; DSI; PO4  | 0.02293506 | 0.03838286 | 1.04492619 |
| LOC728481 | XM_926984.1 | LOC728481 | 1  | PREDICTED: Homo sapiens s   | 0.01639025 | 0.02955031 | 1.04482253 |
| C2orf25   | NM_015702.1 | C2orf25   | 2  | Homo sapiens CL25022        | 0.01466359 | 0.02708428 | 1.04442334 |
| AP2S1     | NM_004069.3 | AP2S1     | 19 | Homo sapiens AP17; CLAPS2   | 0.00451189 | 0.01067376 | 1.04438779 |
| NDUFB9    | NM_005005.2 | NDUFB9    | 8  | Homo sapiens DKFZp566O17    | 0.00600632 | 0.01337636 | 1.04382091 |
| MRPS10    | NM_018141.2 | MRPS10    | 6  | Homo sapiens FLJ10567; PN1  | 0.02247986 | 0.03777813 | 1.04320878 |
| H3F3A     | XR_001222.1 | H3F3A     | 1  | Homo sapiens MGC87783; H:   | 0.01057306 | 0.02096479 | 1.04295614 |
| PSMB7     | NM_002799.2 | PSMB7     | 9  | Homo sapiens Z              | 0.0190383  | 0.03313714 | 1.04205781 |
| SEC61G    | NM_014302.3 | SEC61G    | 7  | Homo sapiens SSS1           | 0.00404639 | 0.00976381 | 1.04101073 |
| LOC402175 | XR_038253.1 | LOC402175 |    | PREDICTED: Homo sapiens n   | 0.0147242  | 0.02717314 | 1.04097313 |
| LOC731542 | XR_015517.2 | LOC731542 |    | PREDICTED: Homo sapiens n   | 0.01754553 | 0.03108146 | 1.04011539 |
| C20orf24  | NM_199485.1 | C20orf24  | 20 | Homo sapiens PNAS-11; RIP1  | 0.01047114 | 0.02081587 | 1.03959148 |
| ATP5J     | NM_00100370 | ATP5J     | 21 | Homo sapiens ATP5A; CF6; F  | 0.01120007 | 0.02195965 | 1.0387676  |
| OAZ1      | NM_004152.2 | OAZ1      | 19 | Homo sapiens OAZ; MGC138    | 0.02531325 | 0.0414626  | 1.03846927 |
| MRFAP1    | NM_033296.1 | MRFAP1    | 4  | Homo sapiens PAM14; PGR1    | 0.02618943 | 0.04258967 | 1.03782127 |
| STRAP     | NM_007178.2 | STRAP     | 12 | Homo sapiens MAWD; PT-WC    | 0.02601745 | 0.04237974 | 1.03739056 |
| LOC402057 | NM_00108049 | LOC402057 | 22 | Homo sapiens similar to 40S | 0.029883   | 0.046959   | 1.03677349 |
| FAM115A   | NM_014719.1 | FAM115A   | 7  | Homo sapiens KIAA0738       | 0.01475788 | 0.02722143 | 1.03656774 |
| LOC648729 | XR_039144.1 | LOC648729 | 8  | PREDICTED: Homo sapiens n   | 0.00781783 | 0.01649149 | 1.03531166 |

## 2.0 ACL-Independent Upreg

| SYMBOL      | SEARCH_KEY  | ILMN_GENE    | CHROMOSOME | DEFINITION                  | SYNONYMS | pval       | fdr        | fold       |
|-------------|-------------|--------------|------------|-----------------------------|----------|------------|------------|------------|
| SMN2        | NM_022875.1 | SMN2         | 5          | Homo sapiens SMNC; BCD54    |          | 0.00416913 | 0.01000222 | 1428.42036 |
| TES         | NM_015641.2 | TES          | 7          | Homo sapiens DKFZP586B20    |          | 5.49E-07   | 1.57E-05   | 299.601935 |
| CEND1       | NM_016564.2 | CEND1        | 11         | Homo sapiens FLJ90066; MG   |          | 3.42E-06   | 5.38E-05   | 242.6427   |
| SPRYD4      | NM_207344.1 | SPRYD4       | 12         | Homo sapiens DKFZp686N08    |          | 0.00182229 | 0.0052602  | 171.176695 |
| MYO19       | NM_00103358 | MYO19        | 17         | Homo sapiens FLJ22865; MY   |          | 8.66E-06   | 0.00010071 | 157.288787 |
| ABCA3       | NM_001089.1 | ABCA3        | 16         | Homo sapiens ABC-C; EST11   |          | 0.01022662 | 0.02043067 | 156.162869 |
| CORO6       | NM_032854.1 | CORO6        | 17         | Homo sapiens FLJ14871       |          | 0.00024972 | 0.00112708 | 73.8383842 |
| KLRC2       | NM_002260.3 | KLRC2        | 12         | Homo sapiens NKG2-C; CD1!   |          | 1.21E-07   | 6.06E-06   | 55.8551391 |
| TM4SF18     | NM_138786.1 | TM4SF18      | 3          | Homo sapiens L6D            |          | 0.00015351 | 0.00078733 | 38.1466038 |
| ARC         | NM_015193.3 | ARC          | 8          | Homo sapiens KIAA0278       |          | 1.54E-06   | 3.11E-05   | 35.8661271 |
| RNF160      | NM_015565.1 | RNF160       | 21         | Homo sapiens FLJ11053; RN   |          | 0.00372667 | 0.00920069 | 35.738803  |
| DNAJC2      | NM_014377.1 | DNAJC2       | 7          | Homo sapiens MPP11; MPHO    |          | 0.00149504 | 0.00453732 | 34.9789065 |
| FAR2        | NM_018099.3 | FAR2         | 12         | Homo sapiens FAR2; FLJ104   |          | 5.31E-06   | 7.21E-05   | 34.4907576 |
| LRRC49      | NM_017691.2 | LRRC49       | 15         | Homo sapiens FLJ20156       |          | 1.17E-06   | 2.55E-05   | 30.4108136 |
| LAMP3       | NM_014398.2 | LAMP3        | 3          | Homo sapiens FLJ3403; DC-L  |          | 1.53E-07   | 6.83E-06   | 30.068582  |
| GFPT2       | NM_005110.1 | GFPT2        | 5          | Homo sapiens GFAT2; FLJ10   |          | 2.98E-06   | 4.85E-05   | 29.2706824 |
| DNA2        | NM_00108044 | DNA2         | 10         | Homo sapiens KIAA0083; DN   |          | 0.01193052 | 0.02308776 | 28.2220645 |
| LOC285550   | XR_001250.1 | LOC285550    |            | PREDICTED: Homo sapiens n   |          | 0.01207041 | 0.02327972 | 27.4624467 |
| SEMA3C      | NM_006379.2 | SEMA3C       | 7          | Homo sapiens SEMAE; SemE    |          | 5.61E-05   | 0.00038932 | 27.3882883 |
| C5orf34     | NM_198566.1 | C5ORF34      | 5          | Homo sapiens MGC46448; Fl   |          | 0.00199458 | 0.00563186 | 27.1011378 |
| NEBL        | NM_006393.1 | NEBL         | 10         | Homo sapiens MGC119747; l   |          | 5.68E-05   | 0.00039189 | 25.9723766 |
| C14orf45    | NM_025057.1 | C14ORF45     | 14         | Homo sapiens FLJ23189       |          | 0.00010398 | 0.0005951  | 25.3425883 |
| LOC400836   | XR_018904.2 | LOC400836    |            | PREDICTED: Homo sapiens n   |          | 0.02046309 | 0.03509434 | 24.5013272 |
| C14orf132   | NM_020215.2 | C14ORF132    | 14         | Homo sapiens DKFZp761F20    |          | 5.66E-05   | 0.00039152 | 23.8023782 |
|             | Hs.133261   | HS.133261    | Y          | UI-E-EJ0-aiq-m-17-0-UI.r1 U |          | 0.00042295 | 0.00169866 | 23.1306905 |
| HEG1        | XM_087386.8 | HEG1         | 3          | Homo sapiens KIAA1237; MS   |          | 2.20E-05   | 0.00019947 | 23.0484594 |
| S1PR5       | NM_030760.3 | S1PR5        | 19         | Homo sapiens SPPR-2; SPPR   |          | 0.01013088 | 0.02029911 | 22.1711862 |
|             | Hs.505676   | HS.505676    | 12         | Homo sapiens cDNA FLJ3377   |          | 9.65E-08   | 5.17E-06   | 22.0251458 |
| SLC36A1     | NM_078483.2 | SLC36A1      | 5          | Homo sapiens TRAMD3; PAT    |          | 5.11E-07   | 1.50E-05   | 21.3909684 |
| PGF         | NM_002632.4 | PGF          | 14         | Homo sapiens PGFL; PIGF-2;  |          | 0.00099806 | 0.00328495 | 21.2031686 |
| LOC10013430 | XM_00172071 | LOC100134301 |            | PREDICTED: Homo sapiens h   |          | 0.00449806 | 0.01065495 | 19.810088  |
|             | Hs.98330    | HS.98330     |            | PREDICTED: Homo sapiens h   |          | 0.0092     | 0.0187837  | 19.5537641 |
| TMEM166     | NM_032181.1 | TMEM166      | 2          | Homo sapiens FLJ13391       |          | 0.00294125 | 0.00763263 | 18.082228  |
| C12orf26    | NM_032230.1 | C12ORF26     | 12         | Homo sapiens FLJ22789       |          | 5.16E-08   | 3.62E-06   | 18.0372824 |
| ZNF767      | NM_024910.1 | ZNF767       | 7          | Homo sapiens MGC51818; Fl   |          | 0.00210371 | 0.00585632 | 17.871045  |
| MYBBP1A     | NM_014520.1 | MYBBP1A      |            | Homo sapiens PAP2; P160; F  |          | 0.01667121 | 0.02995745 | 17.7729712 |
| GPRIN1      | NM_052899.1 | GPRIN1       | 5          | Homo sapiens KIAA1893; GR   |          | 2.05E-05   | 0.00018857 | 17.0784829 |
| ADPRHL1     | NM_199162.1 | ADPRHL1      | 13         | Homo sapiens ARH2           |          | 0.00289391 | 0.00753499 | 17.0378924 |
| NAPEPLD     | NM_198990.3 | NAPEPLD      | 7          | Homo sapiens FMP30; NAPE-   |          | 5.99E-06   | 7.86E-05   | 15.2429616 |
| CHMP7       | NM_152272.2 | CHMP7        | 8          | Homo sapiens MGC29816       |          | 0.01274389 | 0.02428557 | 15.0990651 |
| TMEM59L     | NM_012109.2 | TMEM59L      | 19         | Homo sapiens BSMAP; C19or   |          | 5.20E-08   | 3.60E-06   | 14.5860056 |
| KIAA0513    | NM_014732.2 | KIAA0513     | 16         | Homo sapiens KIAA0513 (KI   |          | 6.08E-05   | 0.0004074  | 14.1891901 |
| SNORA17     | NR_002958.1 | SNORA17      | 9          | Homo sapiens ACA17          |          | 0.00486337 | 0.01134474 | 13.8116369 |
| ENPP5       | NM_021572.4 | ENPP5        | 6          | Homo sapiens KIAA0879       |          | 1.79E-07   | 7.49E-06   | 13.1401558 |
| SERPINE1    | NM_000602.1 | SERPINE1     | 7          | Homo sapiens PAI; PAI-1; PA |          | 1.40E-06   | 2.91E-05   | 13.0884012 |
| ESAM        | NM_138961.1 | ESAM         | 11         | Homo sapiens W117m          |          | 7.57E-08   | 4.47E-06   | 13.0582403 |
| FAM46C      | NM_017709.2 | FAM46C       | 1          | Homo sapiens FLJ20202       |          | 0.00015232 | 0.00078269 | 12.8473254 |
| SRPX2       | NM_014467.1 | SRPX2        | X          | Homo sapiens SRPUL; RESD    |          | 0.00058466 | 0.00218728 | 12.188106  |
| IVD         | NM_002225.2 | IVD          | 15         | Homo sapiens ACAD2          |          | 0.02225433 | 0.03750931 | 11.9638112 |
| SLC22A17    | NM_016609.3 | SLC22A17     | 14         | Homo sapiens BOIT; BOCT; h  |          | 1.87E-06   | 3.52E-05   | 11.7216818 |
| TMTC4       | NM_032813.2 | TMTC4        | 13         | Homo sapiens FLJ22153; FLJ  |          | 7.22E-05   | 0.00046045 | 11.4771653 |
| CHSY3       | NM_175856.4 | CHSY3        | 5          | Homo sapiens CSS3; CHSY2    |          | 0.00042876 | 0.00171757 | 11.0491309 |
| PDLIM7      | NM_005451.3 | PDLIM7       | 5          | Homo sapiens PDZ and LIM c  |          | 0.00037901 | 0.00155671 | 10.8176521 |
| CHD5        | NM_015557.1 | CHD5         | 1          | Homo sapiens KIAA0444; DK   |          | 3.51E-07   | 1.16E-05   | 10.7901794 |
| OR7E156P    | NR_002171.1 | OR7E156P     | 13         | Homo sapiens olfactory rece |          | 9.45E-06   | 0.00010694 | 10.4544178 |
| BAPX1       | NM_001189.2 | BAPX1        | 4          | Homo sapiens NKX3B; NKX3    |          | 0.00150799 | 0.00456385 | 10.3069163 |
| PLAT        | NM_000930.2 | PLAT         | 8          | Homo sapiens T-PA; DKFZp6   |          | 0.0003752  | 0.00154575 | 9.71407628 |
| KCNK13      | NM_022054.2 | KCNK13       | 14         | Homo sapiens THIK-1; THIK1  |          | 0.0136702  | 0.02561954 | 9.04309386 |
| CRISPLD2    | NM_031476.1 | CRISPLD2     | 16         | Homo sapiens DKFZP434B04    |          | 6.70E-10   | 2.70E-07   | 9.02096858 |
| GINS4       | NM_032336.1 | GINS4        | 8          | Homo sapiens MGC14799; SI   |          | 0.02463744 | 0.04060041 | 8.85431774 |
| SPATA7      | NM_018418.1 | SPATA7       | 14         | Homo sapiens MGC102934; l   |          | 1.48E-05   | 0.00014714 | 8.70732135 |
| COL1A1      | NM_000088.2 | COL1A1       | 17         | Homo sapiens OI4            |          | 1.91E-07   | 7.91E-06   | 8.61682613 |
| GCNT3       | NM_004751.1 | GCNT3        | 15         | Homo sapiens C2/4GnT; GnT   |          | 3.09E-06   | 4.97E-05   | 8.43108526 |
| CPA4        | NM_016352.2 | CPA4         | 7          | Homo sapiens CPA3           |          | 1.15E-10   | 9.63E-08   | 8.27241063 |
| SYK         | NM_003177.3 | SYK          | 9          | Homo sapiens spleen tyrosin |          | 0.00655038 | 0.01435274 | 8.16010823 |
| PTPN9       | NM_002833.2 | PTPN9        |            | PREDICTED: Homo sapiens p   |          | 0.00378674 | 0.00929831 | 8.06913959 |
| ANKRD33     | NM_182608.2 | ANKRD33      | 12         | Homo sapiens DKFZp686O16    |          | 0.00092433 | 0.00309382 | 7.89601337 |
| GULP1       | NM_016315.2 | GULP1        | 2          | Homo sapiens CED-6; FLJ31   |          | 0.00216309 | 0.00598181 | 7.79134637 |
| SNN         | NM_003498.3 | SNN          | 16         | Homo sapiens stannin (SNN)  |          | 1.00E-05   | 0.00011164 | 7.73602433 |

## 2.0 ACL-Independent Upreg

|             |             |             |    |                         |                              |            |            |            |
|-------------|-------------|-------------|----|-------------------------|------------------------------|------------|------------|------------|
| WFDC3       | NM_080614.1 | WFDC3       | 20 | Homo sapiens            | WAP14; dJ447                 | 0.00439248 | 0.01043441 | 7.39044882 |
| GSTT2B      | NM_00108084 | GSTT2B      | 22 | Homo sapiens            | MGC87963; G                  | 8.57E-05   | 0.00052031 | 7.3444017  |
| USH1G       | NM_173477.2 | USH1G       | 17 | Homo sapiens            | ANKS4A; FLJ3                 | 0.00790219 | 0.01662428 | 7.26541883 |
| SMAD6       | NM_005585.2 | SMAD6       | 15 | Homo sapiens            | MADH6; HsT1                  | 9.82E-05   | 0.00057157 | 7.22603314 |
| DNER        | NM_139072.2 | DNER        | 2  | Homo sapiens            | bet; UNQ26                   | 1.83E-08   | 1.93E-06   | 7.03057623 |
| METT10D     | NM_024086.2 | METT10D     | 17 | Homo sapiens            | MGC3329                      | 0.00370866 | 0.00916872 | 7.00415784 |
| SLC38A6     | NM_153811.1 | SLC38A6     | 14 | Homo sapiens            | NAT-1; MGC10                 | 0.00073805 | 0.00260679 | 6.99871897 |
| AACS        | NM_023928.2 | AACS        | 12 | Homo sapiens            | FLJ41251; SU                 | 0.00523657 | 0.01199138 | 6.98855995 |
| LOC654433   | NR_015377.1 | LOC654433   | 2  | Homo sapiens            | DKFZp686E10                  | 0.02090443 | 0.03571036 | 6.90829495 |
|             | Hs.20255    | HS.20255    | 2  | Homo sapiens            | AV652851 GLC Homo sapiens    | 0.02240126 | 0.03769266 | 6.82101752 |
| TCIRG1      | NM_006019.2 | TCIRG1      | 11 | Homo sapiens            | ATP6N1C; OC-                 | 9.99E-05   | 0.00057746 | 6.64110181 |
| EFNB1       | NM_004429.3 | EFNB1       | X  | Homo sapiens            | MGC8782; LEF                 | 0.00871605 | 0.01798482 | 6.54599407 |
| FHL1        | NM_001449.3 | FHL1        | X  | Homo sapiens            | KYO-T; SLIM1;                | 7.11E-07   | 1.84E-05   | 6.49047286 |
| RAB6B       | NM_016577.2 | RAB6B       | 3  | Homo sapiens            | RAB6B, memb                  | 2.16E-05   | 0.00019705 | 6.280325   |
| EGFL7       | NM_016215.3 | EGFL7       | 9  | Homo sapiens            | RP11-251M1.2                 | 0.00366183 | 0.00906946 | 6.27768864 |
| HSD11B2     | NM_000196.2 | HSD11B2     | 16 | Homo sapiens            | AME1; HSD2;                  | 0.0004608  | 0.01801873 | 6.24146649 |
| RFESD       | NM_173362.2 | RFESD       | 5  | Homo sapiens            | Rieske (Fe-S)                | 0.01708094 | 0.03045204 | 6.14194827 |
| APLP1       | NM_005166.3 | APLP1       | 19 | Homo sapiens            | APLP                         | 1.14E-05   | 0.00012148 | 6.13388393 |
| LOC644517   | XR_042369.1 | LOC644517   | 4  | PREDICTED: Homo sapiens | n                            | 0.00937999 | 0.01907592 | 6.11802162 |
| MSL1        | NM_00101224 | MSL1        | 17 | Homo sapiens            | DKFZp686J17.                 | 0.00191091 | 0.00545372 | 5.99664959 |
| LOC10013172 | XM_00172015 | LOC10013172 | 4  | PREDICTED: Homo sapiens | h                            | 2.51E-05   | 0.00021957 | 5.96964683 |
| TBX18       | NM_00108050 | TBX18       | 6  | Homo sapiens            | T-box 18 (TBX                | 0.00583898 | 0.01307603 | 5.90195983 |
| PRKACB      | NM_207578.1 | PRKACB      | 1  | Homo sapiens            | PKACB; MGC4                  | 2.86E-05   | 0.00024074 | 5.87021937 |
| OLFML2A     | NM_182487.1 | OLFML2A     | 9  | Homo sapiens            | PRO34319; FL                 | 6.35E-06   | 8.21E-05   | 5.77791161 |
| CCDC92      | NM_025140.1 | CCDC92      | 12 | Homo sapiens            | FLJ22471                     | 2.33E-05   | 0.00020691 | 5.6900378  |
| CCNT2       | NM_001241.2 | CCNT2       | 2  | Homo sapiens            | FLJ90560; MG                 | 0.00278134 | 0.00730842 | 5.64458752 |
| C22orf34    | NM_198851.1 | C22ORF34    | 22 | Homo sapiens            | chromosome 2                 | 0.0025641  | 0.00684179 | 5.56354331 |
| SLC2A3      | NM_006931.1 | SLC2A3      | 12 | Homo sapiens            | GLUT3; FLJ90                 | 2.18E-10   | 1.40E-07   | 5.55821921 |
| ARRDC1      | NM_152285.2 | ARRDC1      | 9  | Homo sapiens            | RP11-48C7.5;                 | 0.01722452 | 0.03063264 | 5.5125439  |
| HNF1B       | NM_000458.2 | HNF1B       | 17 | Homo sapiens            | VHNF1; MODY                  | 9.60E-06   | 0.00010823 | 5.52947109 |
|             | Hs.202140   | HS.202140   |    | Homo sapiens            | BX114021 NCI_CGAP_Lu24 t     | 0.00011733 | 0.00064664 | 5.50692295 |
|             | Hs.22689    | HS.22689    |    | Homo sapiens            | mRNA; cDNA l                 | 0.00093942 | 0.00313083 | 5.49266072 |
| SEMA6A      | NM_020796.2 | SEMA6A      | 5  | Homo sapiens            | VIA; SEMA6A;                 | 2.59E-08   | 2.18E-06   | 5.36114394 |
| PLA2G10     | NM_003561.1 | PLA2G10     | 16 | Homo sapiens            | GXPLA2; SPLA                 | 2.22E-07   | 8.72E-06   | 5.26696467 |
| PCBP4       | NM_033009.1 | PCBP4       | 3  | Homo sapiens            | LIP4; MCG10                  | 0.00081395 | 0.00280115 | 5.25621898 |
| AADAC       | NM_001086.2 | AADAC       | 3  | Homo sapiens            | CES5A1; DAC                  | 0.01457969 | 0.0269568  | 5.24555874 |
| ZNF805      | NM_00102356 | ZNF805      | 19 | Homo sapiens            | DKFZp686P08                  | 0.01321159 | 0.0249407  | 5.23391019 |
| TGFBRAP1    | NM_004257.3 | TGFBRAP1    | 2  | Homo sapiens            | TRAP-1; TRAP                 | 0.00486882 | 0.01135501 | 5.22594538 |
| GSTM1       | NM_000561.2 | GSTM1       | 1  | Homo sapiens            | MGC26563; G                  | 1.36E-06   | 2.85E-05   | 5.19292194 |
| LOC253039   | NR_024408.1 | LOC253039   | 9  | Homo sapiens            | hypothetical l               | 0.01452195 | 0.02689121 | 5.14965877 |
| PITPNA      | NM_006224.2 | PITPNA      | 17 | Homo sapiens            | PITPN; VIB1A;                | 0.00043496 | 0.00173728 | 5.09667042 |
| WDR91       | NM_014149.2 | WDR91       | 7  | Homo sapiens            | HSPC049                      | 0.0069502  | 0.0150288  | 5.08394891 |
| TCEAL5      | NM_00101297 | TCEAL5      | X  | Homo sapiens            | transcription e              | 0.01396271 | 0.02605542 | 5.00405666 |
| HERC6       | NM_00101300 | HERC6       | 4  | Homo sapiens            | FLJ20637                     | 0.00953256 | 0.01933195 | 4.80501107 |
| FARP1       | NM_00100171 | FARP1       | 13 | Homo sapiens            | CDEP; PLEKHC                 | 2.69E-05   | 0.00023116 | 4.80354705 |
| FUT4        | NM_002033.2 | FUT4        | 11 | Homo sapiens            | FCT3A; ELFT;                 | 9.23E-05   | 0.00054653 | 4.7349845  |
| LIMCH1      | NM_014988.1 | LIMCH1      | 4  | Homo sapiens            | DKFZp686B24                  | 0.00500549 | 0.01157687 | 4.7182365  |
| STAT4       | NM_003151.2 | STAT4       | 2  | Homo sapiens            | signal transdu               | 2.05E-06   | 3.78E-05   | 4.6390525  |
| BEGAIN      | NM_020836.2 | BEGAIN      | 14 | Homo sapiens            | KIAA1446; BE                 | 1.37E-07   | 6.48E-06   | 4.60036674 |
| HPCAL4      | NM_016257.2 | HPCAL4      | 1  | Homo sapiens            | DKFZp761G12                  | 1.85E-07   | 7.68E-06   | 4.59035749 |
| LEPR        | NM_002303.3 | LEPR        | 1  | Homo sapiens            | OBR; CD295                   | 0.00496647 | 0.01151848 | 4.58681266 |
| CD40        | NM_001250.3 | CD40        | 20 | Homo sapiens            | TNFRSF5; p50                 | 0.00126919 | 0.00396821 | 4.58351723 |
| WBSCR16     | XM_933544.1 | WBSCR16     | 7  | Homo sapiens            | DKFZp434D04                  | 0.00015786 | 0.00080472 | 4.57134682 |
| AP2A2       | NM_012305.2 | AP2A2       | 11 | Homo sapiens            | CLAPA2; HYPJ                 | 0.00147942 | 0.00449493 | 4.55741113 |
| CKMT1B      | NM_020990.3 | CKMT1B      | 15 | Homo sapiens            | UMTCK; CKMT                  | 1.59E-08   | 1.86E-06   | 4.55436219 |
| FLJ35767    | NM_207459.1 | FLJ35767    | 17 | Homo sapiens            | FLJ35767 prot                | 3.55E-12   | 9.64E-09   | 4.54060616 |
| BBS4        | NM_033028.2 | BBS4        | 15 | Homo sapiens            | Bardet-Biedl s               | 0.00162911 | 0.00484277 | 4.53295705 |
| PLEKHB1     | NM_021200.1 | PLEKHB1     | 11 | Homo sapiens            | PHR1; PHRETJ                 | 1.71E-10   | 1.16E-07   | 4.52660955 |
| LOC649025   | XM_938110.1 | LOC649025   |    | PREDICTED: Homo sapiens | h                            | 1.06E-06   | 2.42E-05   | 4.4903635  |
| HIST1H2BD   | NM_138720.1 | HIST1H2BD   | 6  | Homo sapiens            | H2B.1B; HIRIF                | 9.73E-11   | 8.82E-08   | 4.46468265 |
| MGC18216    | XM_927732.1 | MGC18216    | 15 | PREDICTED: Homo sapiens | h                            | 2.98E-05   | 0.00024768 | 4.4386977  |
|             | Hs.547277   | HS.547277   |    | Homo sapiens            | zh47e08.r1 Soares_fetal_live | 0.00727475 | 0.01556338 | 4.43104276 |
| OVOL2       | NM_021220.2 | OVOL2       | 20 | Homo sapiens            | EUROIMAGE56                  | 0.00152528 | 0.00459955 | 4.39316189 |
| METTL10     | NM_212554.2 | METTL10     | 10 | Homo sapiens            | methyltransfer               | 0.00415177 | 0.00996939 | 4.36664432 |
| CCNYL1      | NM_152523.1 | CCNYL1      | 2  | Homo sapiens            | FLJ40432                     | 2.24E-06   | 4.06E-05   | 4.35090136 |
| DOK4        | NM_018110.2 | DOK4        | 16 | Homo sapiens            | FLJ10488                     | 0.00044171 | 0.0017533  | 4.30188056 |
| RBMS2       | NM_002898.2 | RBMS2       | 12 | Homo sapiens            | SCR3                         | 0.00294977 | 0.00764744 | 4.29056221 |
| NUDT6       | NM_007083.3 | NUDT6       | 4  | Homo sapiens            | ASFGF2; gfg-1                | 0.00157306 | 0.00471093 | 4.2808442  |
| HLA-DRA     | NM_019111.3 | HLA-DRA     | 6  | Homo sapiens            | HLA-DRA1                     | 2.17E-09   | 5.62E-07   | 4.26587575 |
| CTGF        | NM_001901.2 | CTGF        | 6  | Homo sapiens            | CCN2; MGC10                  | 1.30E-11   | 2.35E-08   | 4.24237896 |

## 2.0 ACL-Independent Upreg

|            |             |            |    |                         |                  |            |            |            |
|------------|-------------|------------|----|-------------------------|------------------|------------|------------|------------|
| FAM13A     | NM_014883.2 | FAM13A     | 4  | Homo sapiens            | FLJ34562; MG     | 0.00264901 | 0.00703211 | 4.22115883 |
| HLA-DMB    | NM_002118.3 | HLA-DMB    | 6  | Homo sapiens            | D6S221E; RIN     | 1.04E-08   | 1.45E-06   | 4.18647506 |
| ABCC10     | NM_033450.2 | ABCC10     | 6  | Homo sapiens            | MRP7; EST182     | 2.64E-05   | 0.00022776 | 4.16967341 |
| FLJ90757   | NM_00100433 | FLJ90757   | 17 | PREDICTED: Homo sapiens | h                | 2.56E-07   | 9.35E-06   | 4.14697232 |
| C9orf25    | NM_147202.1 | C9ORF25    | 9  | Homo sapiens            | bA573M23.5;      | 0.00159947 | 0.00477031 | 4.12466579 |
| DIDO1      | NM_080797.2 | DIDO1      | 20 | Homo sapiens            | dJ885L7.8; DI    | 0.02888778 | 0.04583246 | 4.11244684 |
| PKP3       | NM_007183.2 | PKP3       | 11 | Homo sapiens            | plakophilin 3 (  | 0.00319358 | 0.00812069 | 4.10328299 |
| MKS1       | NM_017777.1 | MKS1       | 17 | Homo sapiens            | FLJ20345; ME     | 0.0014954  | 0.00453712 | 4.10266294 |
| HIST2H2AA3 | NM_003516.2 | HIST2H2AA3 | 1  | Homo sapiens            | H2a-615; H2A     | 1.01E-05   | 0.00011253 | 4.10158005 |
| AMN1       | NM_207337.1 | AMN1       | 12 | Homo sapiens            | antagonist of r  | 0.00012045 | 0.00065914 | 4.02545072 |
| LOC730153  | XM_00171767 | LOC730153  | 16 | PREDICTED: Homo sapiens | h                | 9.49E-06   | 0.0001072  | 4.02516904 |
| HES2       | NM_019089.3 | HES2       | 1  | Homo sapiens            | hairly and enh   | 6.39E-07   | 1.74E-05   | 4.02453402 |
| FAM108A3   | NM_00108042 | FAM108A3   | 1  | Homo sapiens            | FAM108A2; C1     | 0.00028627 | 0.00125551 | 4.01150877 |
| SMPDL3A    | NM_006714.2 | SMPDL3A    | 6  | Homo sapiens            | yR36GH4.1; F     | 0.00122115 | 0.00384679 | 4.00286932 |
| CD47       | NM_00102508 | CD47       | 3  | Homo sapiens            | OA3; MER6; I/    | 5.02E-07   | 1.48E-05   | 3.97885248 |
| GAL3ST4    | NM_024637.3 | GAL3ST4    | 7  | Homo sapiens            | FLJ12116; GA     | 7.15E-05   | 0.00045793 | 3.95464472 |
| LOC650708  | XM_939796.1 | LOC650708  |    | PREDICTED: Homo sapiens | s                | 0.00457891 | 0.01080173 | 3.94878903 |
| HYAL3      | NM_003549.2 | HYAL3      | 3  | Homo sapiens            | LUCA14; Minn     | 2.90E-05   | 0.00024373 | 3.94449318 |
| TMEM191B   | XM_938147.1 | TMEM191B   | 22 | PREDICTED: Homo sapiens | t                | 0.00042988 | 0.00172078 | 3.94229095 |
| LOC441714  | XR_019458.2 | LOC441714  |    | PREDICTED: Homo sapiens | n                | 0.01059529 | 0.02099738 | 3.93471196 |
| USP46      | NM_022832.2 | USP46      | 4  | Homo sapiens            | FLJ12552         | 0.00011309 | 0.00062964 | 3.89907233 |
| LOC730323  | XM_00172209 | LOC730323  | 7  | PREDICTED: Homo sapiens | h                | 4.29E-05   | 0.00032331 | 3.86748262 |
| ZMIZ2      | NM_031449.3 | ZMIZ2      | 7  | Homo sapiens            | DKFZp761I21;     | 1.10E-07   | 5.68E-06   | 3.84869901 |
| PRF1       | NM_005041.3 | PRF1       | 10 | Homo sapiens            | HPLH2; FLH2;     | 7.03E-06   | 8.84E-05   | 3.8192034  |
|            | Hs.547601   | HS.547601  | 22 | Homo sapiens            | full length inse | 1.49E-06   | 3.04E-05   | 3.79013575 |
| TMOD1      | NM_003275.1 | TMOD1      | 9  | Homo sapiens            | ETMOD; D9S5      | 0.00095976 | 0.00318495 | 3.74763291 |
| LOC653158  | XM_926814.1 | LOC653158  | 5  | PREDICTED: Homo sapiens | s                | 2.13E-05   | 0.00019491 | 3.73837159 |
| C8orf83    | NR_015339.1 | C8ORF83    | 8  | Homo sapiens            | FLJ40637; DK     | 0.00276042 | 0.00726749 | 3.65721582 |
| KIAA1804   | NM_032435.1 | KIAA1804   | 1  | Homo sapiens            | RP5-862P8.2;     | 0.00985304 | 0.01985222 | 3.64128651 |
| LOC728285  | XM_937100.1 | LOC728285  | 17 | PREDICTED: Homo sapiens | s                | 1.79E-07   | 7.51E-06   | 3.63831131 |
| DNAJB12    | NM_00100276 | DNAJB12    | 10 | Homo sapiens            | DJ10; DKFZp5     | 0.03135807 | 0.04867869 | 3.59746858 |
| PTPN23     | NM_015466.1 | PTPN23     | 3  | Homo sapiens            | HDPTP; KIAA1     | 0.02463816 | 0.04059544 | 3.5910285  |
| SCARNA18   | NR_003139.1 | SCARNA18   | 5  | Homo sapiens            | UI09             | 7.06E-07   | 1.84E-05   | 3.58938669 |
| GALNT2     | NM_004481.2 | GALNT2     | 1  | Homo sapiens            | GalNAc-T2        | 0.00081921 | 0.00281478 | 3.57318483 |
| GLDC       | NM_000170.1 | GLDC       | 9  | Homo sapiens            | MG138198; (      | 2.01E-08   | 2.04E-06   | 3.56463428 |
|            | Hs.21177    | HS.21177   | 6  | Homo sapiens            | mRNA full leng   | 0.00163642 | 0.00485919 | 3.54198526 |
| MMP11      | NM_005940.3 | MMP11      | 22 | Homo sapiens            | ST3; SL-3; ST    | 0.00108531 | 0.00351359 | 3.47504873 |
| ZHX3       | NM_015035.3 | ZHX3       | 20 | Homo sapiens            | KIAA0395; TI     | 0.00028697 | 0.00125758 | 3.46431381 |
| NAV1       | NM_020443.2 | NAV1       | 1  | Homo sapiens            | POMFIL3; KIA     | 0.0029968  | 0.00773616 | 3.45409079 |
| LOC644761  | XR_019390.1 | LOC644761  |    | PREDICTED: Homo sapiens | n                | 1.38E-05   | 0.00013987 | 3.43561275 |
| SOCS5      | NM_014011.4 | SOCS5      | 2  | Homo sapiens            | CIS6; SOCS-5     | 0.01841299 | 0.03226578 | 3.37045041 |
| ATG4A      | NM_178271.1 | ATG4A      |    | Homo sapiens            | APG4A; AURL2     | 2.17E-06   | 3.94E-05   | 3.36271284 |
| PRICKLE1   | NM_153026.1 | PRICKLE1   | 12 | Homo sapiens            | MG138902; I      | 0.00034416 | 0.00144862 | 3.33910305 |
| NKIRAS2    | NM_00100134 | NKIRAS2    | 17 | Homo sapiens            | KBRAS2; MGC      | 7.11E-05   | 0.00045685 | 3.32549125 |
|            | Hs.576106   | HS.576106  | 10 | Homo sapiens            | cDNA FLJ4005     | 2.45E-05   | 0.00021499 | 3.3017224  |
| KIAA0427   | NM_014772.1 | KIAA0427   | 18 | Homo sapiens            | Gm672            | 4.84E-05   | 0.00035087 | 3.29783364 |
| SERPINA5   | NM_000624.3 | SERPINA5   | 14 | Homo sapiens            | PROCI; PAI3;     | 0.00010346 | 0.00059272 | 3.29284938 |
| MAN2A2     | NM_006122.2 | MAN2A2     | 15 | Homo sapiens            | MANA2X           | 0.0023991  | 0.00649723 | 3.27250685 |
| PTPN18     | NM_014369.2 | PTPN18     | 2  | Homo sapiens            | BDP1             | 0.01169573 | 0.02273054 | 3.25631337 |
| GCH1       | NM_000161.2 | GCH1       | 14 | Homo sapiens            | DYT5; GTP-CH     | 0.00612138 | 0.01358807 | 3.23188253 |
| PIGQ       | NM_004204.2 | PIGQ       | 16 | Homo sapiens            | GPI1; c407A1     | 2.18E-05   | 0.0001984  | 3.22930727 |
| ZMAT5      | NM_019103.2 | ZMAT5      | 22 | Homo sapiens            | zinc finger, ma  | 2.25E-06   | 4.05E-05   | 3.22666927 |
| TBC1D5     | NM_014744.1 | TBC1D5     | 3  | Homo sapiens            | KIAA0210         | 0.01264555 | 0.0241405  | 3.2029478  |
| TCTA       | NM_022171.1 | TCTA       | 3  | Homo sapiens            | T-cell leukemi   | 6.17E-06   | 8.01E-05   | 3.19648977 |
| KIAA0319L  | NM_182686.1 | KIAA0319L  | 1  | Homo sapiens            | PP791; RP4-7     | 0.01301354 | 0.02467827 | 3.18046815 |
| SNORA79    | NR_003021.2 | SNORA79    | 14 | Homo sapiens            | ACA65            | 0.00011589 | 0.00064128 | 3.17770629 |
| FLJ32810   | XM_926804.1 | FLJ32810   |    | PREDICTED: Homo sapiens | h                | 0.00782179 | 0.01649665 | 3.14186943 |
| LOC727773  | XM_930899.1 | LOC727773  | 2  | PREDICTED: Homo sapiens | s                | 0.01017941 | 0.02037007 | 3.1387061  |
| SLC43A3    | NM_017611.2 | SLC43A3    | 11 | Homo sapiens            | FOAP-13; EEG     | 0.02385609 | 0.03962525 | 3.1273644  |
| ZNF548     | NM_152909.2 | ZNF548     | 19 | Homo sapiens            | FLJ32932         | 0.02648803 | 0.04288914 | 3.11575041 |
| CR2        | NM_00100665 | CR2        | 1  | Homo sapiens            | CD21; SLEB9;     | 0.00100222 | 0.00329565 | 3.09759823 |
| HTR7       | NM_000872.3 | HTR7       | 10 | Homo sapiens            | 5-HT7            | 0.00020822 | 0.00099294 | 3.09675203 |
| RAB11B     | NM_004218.1 | RAB11B     | 19 | Homo sapiens            | H-YPT3; MGC1     | 0.01467205 | 0.02709529 | 3.09373456 |
| FAM83B     | NM_00101087 | FAM83B     | 6  | Homo sapiens            | FLJ30642; MG     | 0.00128837 | 0.00401664 | 3.08547742 |
| CD24       | NM_013230.2 | CD24       |    | Homo sapiens            | CD24A            | 1.43E-09   | 4.43E-07   | 3.07972204 |
| WDHD1      | NM_00100839 | WDHD1      | 14 | Homo sapiens            | AND-1            | 0.01168039 | 0.02271292 | 3.07597555 |
| LOC284293  | XM_209104.2 | LOC284293  | 18 | PREDICTED: Homo sapiens | s                | 0.00072407 | 0.00257078 | 3.05427353 |
| LOC730525  | NM_199327.1 | LOC730525  |    | PREDICTED: Homo sapiens | h                | 0.00897352 | 0.0184147  | 3.05056564 |
| MAN1A1     | NM_005907.2 | MAN1A1     | 6  | Homo sapiens            | MAN9; HUMM:      | 2.32E-06   | 4.11E-05   | 3.02742586 |
| ADAT2      | NM_182503.2 | ADAT2      | 6  | Homo sapiens            | TAD2; dJ20N2     | 0.00033669 | 0.00142435 | 3.01965937 |

## 2.0 ACL-Independent Upreg

|            |                        |   |                               |            |            |            |
|------------|------------------------|---|-------------------------------|------------|------------|------------|
| CLDN23     | NM_194284.1 CLDN23     |   | 8 Homo sapiens CLDNL; hCG16   | 5.46E-06   | 7.38E-05   | 2.99737474 |
| GDPD5      | NM_030792.4 GDPD5      |   | 11 Homo sapiens PP1665; GDE2  | 1.11E-05   | 0.00011914 | 2.97216968 |
| FAM43A     | NM_153690.4 FAM43A     |   | 3 Homo sapiens FLJ90022       | 4.83E-07   | 1.45E-05   | 2.94936327 |
| SGK        | NM_005627.2 SGK        |   | 6 Homo sapiens SGK1           | 2.91E-09   | 6.88E-07   | 2.94834233 |
| SUSD3      | NM_145006.2 SUSD3      |   | 9 Homo sapiens MGC26847       | 7.23E-05   | 0.00046091 | 2.94542189 |
| HIST1H4K   | NM_003541.2 HIST1H4K   |   | 6 Homo sapiens DJ160A22.1; H  | 0.00348256 | 0.0087028  | 2.94130813 |
| HOXC8      | NM_022658.3 HOXC8      |   | 12 Homo sapiens HOX3; HOX3A   | 0.00232443 | 0.00633448 | 2.93537271 |
| KIF13B     | NM_015254.2 KIF13B     |   | 8 Homo sapiens KIAA0639; GA   | 6.29E-05   | 0.00041745 | 2.92910701 |
| NCRNA00092 | NR_024129.1 NCRNA00092 |   | 9 Homo sapiens non-protein cc | 0.00096691 | 0.00320281 | 2.92906905 |
| TRAPPC2P1  | NR_002166.1 TRAPPC2P1  |   | 19 Homo sapiens SEDLP1; MIP-  | 0.0011014  | 0.00355825 | 2.91751475 |
| RNFT1      | NM_016125.2 RNFT1      |   | 17 Homo sapiens PTD016; MGC   | 1.50E-06   | 3.05E-05   | 2.90719807 |
| OGDHL      | NM_018245.1 OGDHL      |   | 10 Homo sapiens OGDHL         | 4.01E-07   | 1.27E-05   | 2.90342124 |
| PCIF1      | NM_022104.3 PCIF1      |   | 20 Homo sapiens PCIF1         | 0.00203089 | 0.00571066 | 2.89707854 |
| U2AF1L4    | NM_144987.1 U2AF1L4    |   | 19 Homo sapiens U2AF1L3; U2a  | 0.000759   | 0.00265748 | 2.89509175 |
| SH3BGR2    | NM_031469.1 SH3BGR2    |   | 6 Homo sapiens FLJ90025       | 6.41E-08   | 4.15E-06   | 2.89178575 |
| RUNDC3B    | NM_138290.1 RUNDC3B    |   | 7 Homo sapiens RPIP9; RPIB9;  | 4.38E-06   | 6.34E-05   | 2.88820909 |
| TMEM25     | NM_032780.2 TMEM25     |   | 11 Homo sapiens FLJ14399      | 0.00107812 | 0.00349658 | 2.88361746 |
| ELOVL3     | NM_152310.1 ELOVL3     |   | 10 Homo sapiens CIG30; CIG-30 | 2.08E-07   | 8.40E-06   | 2.88053294 |
| TMEM80     | XM_938671.1 TMEM80     |   | PREDICTED: Homo sapiens t     | 0.00538295 | 0.01224145 | 2.87943137 |
| TMCO4      | NM_181719.2 TMCO4      |   | 1 Homo sapiens RP5-1056L3.6   | 0.01121281 | 0.02198066 | 2.87261639 |
| HPSE       | NM_006665.2 HPSE       |   | 4 Homo sapiens HPA; HSE1; H   | 4.19E-05   | 0.00031765 | 2.86953755 |
| ATP6AP1L   | NM_00101797 ATP6AP1L   |   | 5 Homo sapiens MGC138396      | 4.77E-06   | 6.67E-05   | 2.86946032 |
| LFNG       | NM_00104016 LFNG       |   | 7 Homo sapiens SCDO3          | 2.26E-06   | 4.06E-05   | 2.85270349 |
| ZXDB       | NM_007157.3 ZXDB       | X | Homo sapiens dJ83L6.1         | 0.0004213  | 0.00169393 | 2.83781999 |
| CSPG4      | NM_001897.3 CSPG4      |   | 15 Homo sapiens MSK16; MCSP   | 8.13E-05   | 0.00049856 | 2.83380627 |
| CRLF1      | NM_004750.2 CRLF1      |   | 19 Homo sapiens CISS; CISS1;  | 1.76E-07   | 7.43E-06   | 2.83021587 |
| SGK1       | NM_005627.3 SGK1       |   | 6 Homo sapiens SGK            | 1.97E-08   | 2.02E-06   | 2.82448689 |
| RALGPS1    | NM_014636.1 RALGPS1    |   | 9 Homo sapiens KIAA0351; RA   | 7.93E-05   | 0.00049227 | 2.81063737 |
| CCS        | XM_938909.1 CCS        |   | PREDICTED: Homo sapiens c     | 1.07E-06   | 2.42E-05   | 2.79456126 |
| SLC25A21   | NM_030631.1 SLC25A21   |   | 14 Homo sapiens MGC126570; C  | 0.00029006 | 0.00126501 | 2.78648117 |
| DAB2       | NM_001343.1 DAB2       |   | 5 Homo sapiens FLJ26626; DO   | 0.00154388 | 0.00464532 | 2.78568409 |
| XKR8       | NM_018053.2 XKR8       |   | 1 Homo sapiens XRG8; FLJ103   | 0.00043511 | 0.00173661 | 2.7785914  |
| SCARNA11   | NR_003012.1 SCARNA11   |   | 12 Homo sapiens ACA57         | 8.59E-09   | 1.30E-06   | 2.76318493 |
| CHURC1     | NM_145165.2 CHURC1     |   | 14 Homo sapiens FLJ33064; chc | 9.51E-08   | 5.22E-06   | 2.75953596 |
| FOXD4L1    | NM_012184.3 FOXD4L1    |   | 2 Homo sapiens bA395L14.1     | 3.58E-05   | 0.00028376 | 2.74989459 |
| FZD3       | NM_017412.2 FZD3       |   | 8 Homo sapiens hFz3; Fz-3     | 0.00217044 | 0.00599755 | 2.74663223 |
|            | Hs.522924 Hs.522924    |   | 10 Homo sapiens cDNA FLJ4316  | 0.00044631 | 0.00176703 | 2.74184659 |
| TPCN2      | NM_139075.1 TPCN2      |   | Homo sapiens FLJ41094; TPC    | 0.01319609 | 0.02492009 | 2.74164457 |
| OPTN       | NM_00100821 OPTN       |   | 10 Homo sapiens FIP2; HYPL; N | 2.32E-07   | 8.96E-06   | 2.74101731 |
| GEM        | NM_005261.2 GEM        |   | 8 Homo sapiens KIR; MGC2629   | 0.00014499 | 0.00075505 | 2.73698747 |
| ADCK5      | NM_174922.3 ADCK5      |   | 8 Homo sapiens MGC126708; I   | 4.95E-06   | 6.84E-05   | 2.73665522 |
| ZNF354A    | NM_005649.2 ZNF354A    |   | 5 Homo sapiens EZNF; TCF17;   | 0.0023903  | 0.00647502 | 2.73321813 |
| GALNT5     | NM_014568.1 GALNT5     |   | 2 Homo sapiens MGC165041; C   | 0.01731164 | 0.03076241 | 2.73226737 |
| CA11       | NM_001217.3 CA11       |   | 19 Homo sapiens CARP2; CA-RP  | 0.00014297 | 0.00074596 | 2.73094642 |
| C7orf52    | NM_198571.1 C7ORF52    |   | 7 Homo sapiens FLJ39237; DK   | 0.00189922 | 0.0054275  | 2.71821568 |
| MICAL1     | NM_022765.2 MICAL1     |   | 6 Homo sapiens NICAL; DKFZp   | 2.42E-05   | 0.00021305 | 2.70441853 |
| C3orf59    | NM_178496.2 C3ORF59    |   | 3 Homo sapiens chromosome 3   | 0.01349158 | 0.02536791 | 2.70356935 |
| RELL2      | NM_173828.3 RELL2      |   | 5 Homo sapiens RELL2; FLJ905  | 0.00036335 | 0.00150952 | 2.69686453 |
| ETNK2      | NM_018208.1 ETNK2      |   | 1 Homo sapiens FLJ10761; HM   | 8.99E-05   | 0.00053821 | 2.68454981 |
| TFAP2C     | NM_003222.3 TFAP2C     |   | 20 Homo sapiens AP2-GAMMA; T  | 7.89E-07   | 1.95E-05   | 2.68173922 |
| MTSS1      | NM_014751.2 MTSS1      |   | 8 Homo sapiens MIM; KIAA042   | 1.79E-06   | 3.44E-05   | 2.68062445 |
| HOXC4      | NM_014620.2 HOXC4      |   | 12 Homo sapiens cp19; HOX3E;  | 0.00224362 | 0.00615128 | 2.67865464 |
| MPP7       | NM_173496.2 MPP7       |   | 10 Homo sapiens FLJ32798; RP  | 0.00044017 | 0.00174972 | 2.67778479 |
| CD164L2    | NM_207397.1 CD164L2    |   | 1 Homo sapiens UNQ6122        | 0.00499412 | 0.01155794 | 2.67485905 |
| AMH        | NM_000479.2 AMH        |   | 19 Homo sapiens MIF; MIS      | 8.45E-05   | 0.00051412 | 2.67447996 |
| IFIT1      | NM_001548.2 IFIT1      |   | 10 Homo sapiens RNM561; IFI-  | 0.00305175 | 0.00784076 | 2.67210523 |
| DNAJC27    | NM_016544.1 DNAJC27    |   | 2 Homo sapiens RabJS; DKFZp   | 0.00277802 | 0.00730853 | 2.669608   |
| FZD4       | NM_012193.2 FZD4       |   | 11 Homo sapiens FzE4; EVR1; C | 1.50E-07   | 6.75E-06   | 2.66889952 |
| FOXD4      | NM_207305.2 FOXD4      |   | 9 Homo sapiens FOXD4A; MGC    | 5.51E-07   | 1.57E-05   | 2.65172547 |
| ABHD8      | NM_024527.3 ABHD8      |   | 19 Homo sapiens FLJ11743; MG  | 3.67E-06   | 5.63E-05   | 2.62458054 |
| MUC1       | NM_00104439 MUC1       |   | 1 Homo sapiens PEMT; PUM; PI  | 0.00025145 | 0.00113109 | 2.62453331 |
| PTPN20     | XM_937744.1 PTPN20     |   | PREDICTED: Homo sapiens p     | 0.0199576  | 0.03441205 | 2.61504122 |
| KISS1R     | NM_032551.3 KISS1R     |   | 19 Homo sapiens HOT7T175; A>  | 1.77E-06   | 3.41E-05   | 2.61383203 |
| CHCHD7     | NM_00101167 CHCHD7     |   | 8 Homo sapiens FLJ40966; MG   | 4.36E-08   | 3.16E-06   | 2.6040121  |
| MLF1IP     | NM_024629.2 MLF1IP     |   | 4 Homo sapiens CENPU; KLIP1   | 0.00027489 | 0.0012169  | 2.60185876 |
| LYPD6      | NM_194317.2 LYPD6      |   | 2 Homo sapiens MGC52057       | 0.00096722 | 0.00320284 | 2.59459702 |
| AP2A1      | NM_014203.2 AP2A1      |   | 19 Homo sapiens CLAPA1; AP2-  | 4.77E-06   | 6.68E-05   | 2.57804436 |
| VAC14      | NM_018052.3 VAC14      |   | PREDICTED: Homo sapiens V     | 2.46E-05   | 0.00021574 | 2.56892244 |
| SOX12      | NM_006943.2 SOX12      |   | 20 Homo sapiens SOX22         | 0.01128764 | 0.02209547 | 2.56882207 |
| GPR137B    | NM_003272.1 GPR137B    |   | 1 Homo sapiens TM7SF1         | 0.00010511 | 0.00059936 | 2.55938169 |

## 2.0 ACL-Independent Upreg

|             |             |              |   |                               |            |            |            |
|-------------|-------------|--------------|---|-------------------------------|------------|------------|------------|
| PKK3        | NM_005391.1 | PKK3         | X | Homo sapiens pyruvate dehy    | 0.00013649 | 0.00071801 | 2.5562195  |
| PLEKHM1     | NM_014798.1 | PLEKHM1      |   | PREDICTED: Homo sapiens p     | 1.14E-05   | 0.00012146 | 2.55571002 |
| MANEAL      | NM_00103174 | MANEAL       |   | 1 Homo sapiens RP11-109P14.   | 0.00093644 | 0.0031228  | 2.54273319 |
| CHMP6       | NM_024591.3 | CHMP6        |   | PREDICTED: Homo sapiens c     | 0.00606592 | 0.01349251 | 2.53437945 |
| C4orf33     | NM_173487.1 | C4ORF33      |   | 4 Homo sapiens FLJ33703       | 5.10E-05   | 0.00036177 | 2.52940546 |
| GRAMD3      | NM_023927.1 | GRAMD3       |   | 5 Homo sapiens NS3TP2; FLJ2.  | 0.00013177 | 0.00070303 | 2.50516153 |
| TMEM22      | NM_025246.1 | TMEM22       |   | 3 Homo sapiens DKFZp564K24    | 0.00669585 | 0.01461255 | 2.50486752 |
| RND3        | NM_005168.3 | RND3         |   | 2 Homo sapiens RhoE; Rho8; r  | 2.18E-08   | 2.09E-06   | 2.50379829 |
| METTL9      | NM_00107718 | METTL9       |   | 16 Homo sapiens PAP1; FLJ2191 | 0.02507231 | 0.04114235 | 2.49924415 |
| FBXO17      | NM_148169.1 | FBXO17       |   | 19 Homo sapiens FBXO26; MGC   | 8.23E-05   | 0.00050383 | 2.49915991 |
| LOC645448   | XM_928480.1 | LOC645448    |   | 9 PREDICTED: Homo sapiens s   | 0.02615327 | 0.04254359 | 2.49772281 |
| NAV3        | NM_014903.3 | NAV3         |   | 12 Homo sapiens unc53H3; STE  | 0.00044776 | 0.00177702 | 2.49300285 |
| TTC13       | XM_939087.1 | TTC13        |   | 1 Homo sapiens FLJ22584       | 0.00058165 | 0.00217979 | 2.4895637  |
| JUN         | NM_002228.3 | JUN          |   | 1 Homo sapiens AP1; c-Jun     | 5.89E-10   | 2.46E-07   | 2.48565745 |
| MCM3APAS    | NR_002776.1 | MCM3APAS     |   | 21 Homo sapiens C21orf85; FLJ | 0.02058691 | 0.03524551 | 2.48565365 |
| PCBD2       | NM_032151.3 | PCBD2        |   | 5 Homo sapiens DCOH2; DCOH    | 0.01822336 | 0.03200055 | 2.48433052 |
| MMP15       | NM_002428.2 | MMP15        |   | 16 Homo sapiens MTMMP2; MT2   | 0.00042466 | 0.00170489 | 2.48022571 |
| LMO2        | NM_005574.2 | LMO2         |   | 11 Homo sapiens TTG2; RBTN2;  | 0.00217149 | 0.00599741 | 2.4688272  |
| GSTT2       | NM_00108084 | GSTT2        |   | Homo sapiens glutathione S-   | 9.26E-06   | 0.00010575 | 2.46580488 |
| EGFR        | NM_201284.1 | EGFR         |   | 7 Homo sapiens ERBB1; HER1;   | 0.01259079 | 0.02406131 | 2.45902788 |
| C14orf21    | NM_174913.1 | C14ORF21     |   | 14 Homo sapiens KIAA2021      | 0.01638893 | 0.02955284 | 2.45277145 |
| HCP5        | NM_006674.2 | HCP5         |   | 6 Homo sapiens P5-1; D6S265   | 1.49E-08   | 1.85E-06   | 2.45143457 |
| ZNF177      | NM_003451.1 | ZNF177       |   | 19 Homo sapiens PIGX          | 0.03088506 | 0.04815074 | 2.44413758 |
| C11orf60    | NM_020153.2 | C11ORF60     |   | 11 Homo sapiens C11orf2; FLJ2 | 0.00175991 | 0.00513744 | 2.44402645 |
| LOC10013377 | XM_00171384 | LOC100133770 |   | PREDICTED: Homo sapiens s     | 0.02003671 | 0.0344992  | 2.43378532 |
| LOC648526   | XM_937579.1 | LOC648526    |   | PREDICTED: Homo sapiens s     | 2.83E-08   | 2.33E-06   | 2.42578123 |
| TMEM2       | NM_013390.1 | TMEM2        |   | 9 Homo sapiens transmembrar   | 9.23E-06   | 0.0001056  | 2.42510952 |
| GM2A        | NM_000405.3 | GM2A         |   | 5 Homo sapiens SAP-3          | 0.00014998 | 0.00077397 | 2.41973344 |
| ARL3        | NM_004311.2 | ARL3         |   | 10 Homo sapiens ARL3          | 7.09E-08   | 4.35E-06   | 2.41804124 |
| MYO1D       | NM_015194.1 | MYO1D        |   | 17 Homo sapiens KIAA0727; my  | 6.87E-07   | 1.82E-05   | 2.41465752 |
| NEU1        | NM_000434.2 | NEU1         |   | 6 Homo sapiens NEU; SIAL1     | 3.34E-09   | 7.57E-07   | 2.40882075 |
| LOC339352   | XR_019601.2 | LOC339352    |   | PREDICTED: Homo sapiens n     | 0.00021248 | 0.00100622 | 2.39954871 |
| PNPLA8      | NM_015723.2 | PNPLA8       |   | 7 Homo sapiens IPLA2G; IPLA2  | 5.16E-05   | 0.00036487 | 2.39407906 |
| SGSM1       | XM_943783.1 | SGSM1        |   | 22 Homo sapiens MGC133298; I  | 0.0011179  | 0.00359766 | 2.39396386 |
| TNFSF9      | NM_003811.2 | TNFSF9       |   | 19 Homo sapiens 4-1BB-L       | 2.21E-05   | 0.00019969 | 2.3910442  |
| VASH1       | NM_014909.2 | VASH1        |   | 14 Homo sapiens KIAA1036      | 7.00E-07   | 1.83E-05   | 2.38741638 |
| C9orf169    | NM_199001.1 | C9ORF169     |   | Homo sapiens chromosome 9     | 1.86E-06   | 3.51E-05   | 2.38204588 |
| SLC35E3     | NM_018656.2 | SLC35E3      |   | 12 Homo sapiens BLOV1         | 1.69E-05   | 0.00016367 | 2.37701575 |
| MPP1        | NM_002436.2 | MPP1         | X | Homo sapiens AAG12; EMP5!     | 2.78E-06   | 4.64E-05   | 2.37656247 |
| MT1G        | NM_005950.1 | MT1G         |   | 16 Homo sapiens MT1; MT1K; M  | 8.65E-10   | 3.13E-07   | 2.37474616 |
| JAK2        | NM_004972.2 | JAK2         |   | 9 Homo sapiens JTK10          | 0.00656776 | 0.01438211 | 2.37101175 |
| KCNS3       | NM_002252.3 | KCNS3        |   | 2 Homo sapiens MGC9481; KV    | 6.97E-06   | 8.78E-05   | 2.36588828 |
| MGC39900    | XM_936687.1 | MGC39900     |   | PREDICTED: Homo sapiens h     | 3.57E-08   | 2.73E-06   | 2.35524918 |
| BMPR2       | NM_001204.5 | BMPR2        |   | 2 Homo sapiens BRK-3; BMPR3   | 0.0009747  | 0.00322172 | 2.35296208 |
| CAPN5       | NM_004055.3 | CAPN5        |   | 11 Homo sapiens HTRA3; FLJ46  | 3.49E-06   | 5.43E-05   | 2.34529672 |
| NRGN        | NM_006176.1 | NRGN         |   | 11 Homo sapiens RC3; hng      | 1.01E-08   | 1.42E-06   | 2.32563247 |
| CYR61       | NM_001554.3 | CYR61        |   | 1 Homo sapiens CCN1; IGFBP1   | 5.15E-09   | 9.48E-07   | 2.31990782 |
| CYP2R1      | NM_024514.4 | CYP2R1       |   | 11 Homo sapiens MGC4663       | 1.09E-06   | 2.43E-05   | 2.31727943 |
| CTAGE5      | NM_203356.1 | CTAGE5       |   | 14 Homo sapiens MEA6; MGEA;   | 0.00091734 | 0.00307896 | 2.31379061 |
| CNOT6L      | NM_144571.2 | CNOT6L       |   | 4 Homo sapiens CCR4b          | 0.01868257 | 0.03262245 | 2.31362342 |
| ARHGAP29    | NM_004815.2 | ARHGAP29     |   | 1 Homo sapiens RP11-255E17.   | 0.00030993 | 0.00133347 | 2.31133339 |
| ST7OT2      | NR_002331.1 | ST7OT2       |   | 7 Homo sapiens ST7 overlappir | 0.02026813 | 0.03479843 | 2.31120374 |
| LOC732371   | XM_941758.1 | LOC732371    |   | PREDICTED: Homo sapiens s     | 0.00148618 | 0.00451294 | 2.31029319 |
| ISL1        | NM_002202.1 | ISL1         |   | 5 Homo sapiens Isl-1          | 2.02E-05   | 0.00018705 | 2.30926991 |
| AGTPBP1     | NM_015239.1 | AGTPBP1      |   | 9 Homo sapiens NNA1; KIAA1C   | 0.00195774 | 0.00555094 | 2.30477119 |
| SNORA31     | NR_002967.1 | SNORA31      |   | 13 Homo sapiens ACA31         | 0.02183614 | 0.03693622 | 2.30231854 |
| MICA        | NM_000247.1 | MICA         |   | 6 Homo sapiens PERB11.1; MG   | 3.61E-07   | 1.19E-05   | 2.30019425 |
| CORIN       | NM_006587.2 | CORIN        |   | 4 Homo sapiens Lrp4; TMPRSS   | 3.07E-07   | 1.05E-05   | 2.29107506 |
| C5orf5      | NM_016603.1 | C5ORF5       |   | 5 Homo sapiens KHCHP; MGC5    | 2.19E-05   | 0.00019894 | 2.28268903 |
| TM2D2       | NM_078473.2 | TM2D2        |   | 8 Homo sapiens MGC125814; I   | 1.44E-05   | 0.00014397 | 2.27331494 |
| GOSR1       | NM_004871.2 | GOSR1        |   | 17 Homo sapiens GOS-28; GOS:  | 0.02331404 | 0.03889132 | 2.27310161 |
| SORL1       | NM_003105.3 | SORL1        |   | 11 Homo sapiens LR11; LRP9; S | 7.42E-06   | 9.11E-05   | 2.27039005 |
| ISG20       | NM_002201.4 | ISG20        |   | 15 Homo sapiens CD25; HEM45   | 0.00583459 | 0.01306891 | 2.26850642 |
| SP100       | NM_00108039 | SP100        |   | 2 Homo sapiens DKFZp686E07    | 0.0003993  | 0.00162168 | 2.26581944 |
| RN7SK       | NR_001445.1 | RN7SK        |   | 6 Homo sapiens 7SK            | 6.21E-08   | 4.07E-06   | 2.26554567 |
| DIP2A       | NM_206889.1 | DIP2A        |   | 21 Homo sapiens DIP2; C21orf1 | 6.89E-06   | 8.73E-05   | 2.2649048  |
| SNORD13     | Hs.583806   | SNORD13      |   | 8 Homo sapiens U13            | 1.94E-08   | 2.01E-06   | 2.25948218 |
| C21orf2     | NM_004928.1 | C21ORF2      |   | 21 Homo sapiens A2; YF5       | 0.00099806 | 0.00328594 | 2.25898119 |
| SNORD3A     | NR_006880.1 | SNORD3A      |   | 17 Homo sapiens U3            | 3.11E-09   | 7.19E-07   | 2.2551573  |
| CNTD2       | NM_024877.1 | CNTD2        |   | 19 Homo sapiens FLJ13265      | 0.00841028 | 0.01749339 | 2.25177548 |

## 2.0 ACL-Independent Upreg

|           |             |           |    |                         |                 |            |            |            |
|-----------|-------------|-----------|----|-------------------------|-----------------|------------|------------|------------|
| PCDH15    | NM_033056.2 | PCDH15    | 10 | Homo sapiens            | USH1H; DFNB     | 0.0171901  | 0.03059646 | 2.24855177 |
| CSPG4LYP2 | NR_002194.1 | CSPG4LYP2 |    | Homo sapiens            | chondroitin su  | 0.00764971 | 0.01621554 | 2.2481304  |
| LOC652458 | XM_941907.1 | LOC652458 |    | PREDICTED: Homo sapiens | s               | 0.02492596 | 0.04099506 | 2.24756738 |
| C1orf53   | NM_00102459 | C1ORF53   | 1  | Homo sapiens            | chromosome 1    | 2.82E-07   | 1.00E-05   | 2.24399788 |
| SCNN1D    | NM_002978.2 | SCNN1D    | 1  | Homo sapiens            | SCNED; ENAC     | 0.00012581 | 0.00067991 | 2.2405168  |
| PLD1      | NM_002662.2 | PLD1      | 3  | Homo sapiens            | phospholipase   | 0.00701176 | 0.0151258  | 2.24002821 |
| PRPH      | NM_006262.3 | PRPH      | 12 | Homo sapiens            | PRPH1; NEF4     | 4.91E-07   | 1.46E-05   | 2.23394371 |
| FAM71E1   | NM_138411.1 | FAM71E1   | 19 | Homo sapiens            | FLJ27522; FLJ   | 1.44E-09   | 4.36E-07   | 2.23146029 |
| LPXN      | NM_004811.1 | LPXN      | 11 | Homo sapiens            | LDPL            | 0.00065524 | 0.00238165 | 2.23021922 |
| SLC30A1   | NM_021194.2 | SLC30A1   | 1  | Homo sapiens            | ZNT1; ZRC1      | 8.27E-06   | 9.79E-05   | 2.22328267 |
| TBC1D2    | NM_018421.2 | TBC1D2    | 9  | Homo sapiens            | FLJ10702; DK    | 0.00035943 | 0.00149723 | 2.21401656 |
| C20orf108 | NM_080821.1 | C20ORF108 | 20 | Homo sapiens            | DKFZP434A11     | 1.80E-08   | 1.94E-06   | 2.20277983 |
| CYB5R1    | NM_016243.2 | CYB5R1    | 1  | Homo sapiens            | B5R.1; NQO3/    | 2.94E-06   | 4.81E-05   | 2.19776359 |
| FLJ10986  | NM_018291.2 | FLJ10986  | 1  | Homo sapiens            | RP11-242B9.1    | 6.03E-05   | 0.00040513 | 2.18621867 |
| TMEM50A   | NM_014313.2 | TMEM50A   | 1  | Homo sapiens            | SMP1; RP11-3    | 3.45E-05   | 0.00027484 | 2.18406759 |
| IRX3      | NM_024336.1 | IRX3      | 16 | Homo sapiens            | IRX-1           | 7.86E-07   | 1.95E-05   | 2.18336742 |
| LOC653166 | XM_926309.1 | LOC653166 | 17 | PREDICTED: Homo sapiens | s               | 0.02301543 | 0.03848772 | 2.17623283 |
| CLN5      | NM_006493.1 | CLN5      | 13 | Homo sapiens            | FLJ90628; NC    | 0.0019263  | 0.00548325 | 2.17485281 |
| RAB24     | NM_00103167 | RAB24     | 5  | Homo sapiens            | RAB24, memb     | 6.81E-08   | 4.23E-06   | 2.17081199 |
| RNU4-2    | NR_003137.2 | RNU4-2    |    | Homo sapiens            | RNA, U4 small   | 6.11E-06   | 7.95E-05   | 2.17004348 |
| GADD45B   | NM_015675.1 | GADD45B   | 19 | Homo sapiens            | MYD118; DKF     | 3.89E-05   | 0.00029999 | 2.16327082 |
| FLJ21865  | NM_022759.1 | FLJ21865  | 17 | Homo sapiens            | DKFZp434P17     | 0.00023438 | 0.00107886 | 2.15934264 |
| LASS5     | NM_147190.1 | LASS5     | 12 | Homo sapiens            | Trh4; MGC454    | 1.49E-05   | 0.00014784 | 2.14733978 |
| DAAM1     | NM_014992.1 | DAAM1     | 14 | Homo sapiens            | FLJ41657; KIA   | 7.83E-05   | 0.00048864 | 2.13318411 |
| OSMR      | NM_003999.1 | OSMR      | 5  | Homo sapiens            | OSMRB; MGC      | 0.02499031 | 0.04105739 | 2.13235242 |
| GLDN      | NM_181789.1 | GLDN      | 15 | Homo sapiens            | CRG-L2; UNC-    | 1.73E-05   | 0.00016613 | 2.12713669 |
| KBTBD7    | NM_032138.3 | KBTBD7    | 13 | Homo sapiens            | DKFZP434E23     | 0.00341236 | 0.00855096 | 2.12463913 |
| MOCS1     | NM_138928.1 | MOCS1     | 6  | Homo sapiens            | MOCS1B; MIG     | 0.00060692 | 0.0022535  | 2.1219503  |
| ZBTB42    | NM_00113760 | ZBTB42    | 14 | Homo sapiens            | zinc finger anc | 2.89E-05   | 0.0002427  | 2.11991552 |
| ACAD10    | NM_025247.3 | ACAD10    | 12 | Homo sapiens            | MGC5601         | 9.81E-05   | 0.00057148 | 2.11644193 |
| TUFT1     | NM_020127.1 | TUFT1     | 1  | Homo sapiens            | tuftelin 1 (TUF | 2.99E-08   | 2.41E-06   | 2.11080753 |
| DENND1A   | NM_020946.1 | DENND1A   | 9  | Homo sapiens            | RP11-230L22.    | 0.00920736 | 0.01879518 | 2.10813785 |
| CHD2      | NM_001271.1 | CHD2      | 15 | Homo sapiens            | DKFZp781D17     | 0.00122216 | 0.00384776 | 2.10813699 |
|           | Hs.326560   | HS.326560 |    | PREDICTED: Homo sapiens | L               | 0.00012167 | 0.00066313 | 2.10550767 |
| LOC441019 | XM_498969.2 | LOC441019 | 4  | PREDICTED: Homo sapiens | h               | 9.30E-07   | 2.19E-05   | 2.10483268 |
| UFSP1     | NM_00101507 | UFSP1     | 7  | Homo sapiens            | UFM1-specific   | 0.00106361 | 0.00345571 | 2.10219811 |
| ST3GAL5   | NM_003896.2 | ST3GAL5   | 2  | Homo sapiens            | SIAT9; ST3Ga    | 1.39E-06   | 2.91E-05   | 2.09866714 |
| PPP1R12C  | NM_017607.1 | PPP1R12C  | 19 | Homo sapiens            | p84; DKFZp43    | 0.00020349 | 0.00097381 | 2.09550921 |
| FAH       | NM_000137.1 | FAH       | 15 | Homo sapiens            | fumarylacetoa   | 0.0211219  | 0.03600263 | 2.08298813 |
| MLF1      | NM_022443.2 | MLF1      | 3  | Homo sapiens            | myeloid leukei  | 3.49E-06   | 5.42E-05   | 2.07886961 |
| AKAP13    | NM_007200.3 | AKAP13    | 15 | Homo sapiens            | HA-3; FLJ1195   | 4.22E-05   | 0.00031939 | 2.07804002 |
| LOC729776 | Hs.535844   | LOC729776 | 6  | PREDICTED: Homo sapiens | h               | 4.93E-05   | 0.00035417 | 2.07753427 |
| VGF       | NM_003378.2 | VGF       | 7  | Homo sapiens            | VGF nerve gro   | 1.40E-09   | 4.46E-07   | 2.07641015 |
| PARM1     | NM_015393.2 | PARM1     | 4  | Homo sapiens            | prostate andrc  | 6.32E-09   | 1.06E-06   | 2.07347694 |
| LOC645166 | XM_00112944 | LOC645166 | 4  | PREDICTED: Homo sapiens | s               | 5.67E-09   | 9.63E-07   | 2.07279902 |
| ADAMTSL5  | NM_213604.1 | ADAMTSL5  | 19 | Homo sapiens            | THSD6           | 0.00045169 | 0.00178183 | 2.07193936 |
| FRMD3     | NM_174938.3 | FRMD3     | 9  | Homo sapiens            | MGC20553; EI    | 0.01593464 | 0.02888701 | 2.0711046  |
| CSAD      | NM_015989.3 | CSAD      | 12 | Homo sapiens            | PCAP; MGC11     | 3.06E-05   | 0.00025302 | 2.06746952 |
| MYOM2     | NM_003970.1 | MYOM2     | 8  | Homo sapiens            | TTNAP           | 0.00314204 | 0.0080253  | 2.06737739 |
| TMEM45A   | NM_018004.1 | TMEM45A   | 3  | Homo sapiens            | DERP7; FLJ10    | 1.23E-05   | 0.00012842 | 2.06708011 |
| CRIP2     | NM_001312.2 | CRIP2     | 14 | Homo sapiens            | CRP2; CRIP; E   | 8.63E-08   | 4.93E-06   | 2.06276132 |
| ANGPTL4   | NM_00103966 | ANGPTL4   | 19 | Homo sapiens            | HFARP; ANGPT    | 2.01E-05   | 0.00018629 | 2.05643354 |
| SUSD2     | NM_019601.3 | SUSD2     | 22 | Homo sapiens            | BK65A6.2; FL    | 2.00E-05   | 0.00018605 | 2.05642799 |
| EXPH5     | NM_015065.1 | EXPH5     | 11 | Homo sapiens            | SLAC2-B; KIA    | 0.00756831 | 0.01607433 | 2.05520284 |
| LOC388588 | XM_946205.1 | LOC388588 | 1  | PREDICTED: Homo sapiens | h               | 4.27E-05   | 0.00032212 | 2.05422335 |
| SLC35F3   | NM_173508.1 | SLC35F3   | 1  | Homo sapiens            | FLJ37712        | 0.00441936 | 0.01048682 | 2.0535939  |
| SLCO1B3   | NM_019844.1 | SLCO1B3   | 12 | Homo sapiens            | LST-3TM13; S    | 0.00018009 | 0.00088883 | 2.0489564  |
| CKMT1A    | NM_00101500 | CKMT1A    | 15 | Homo sapiens            | UMTCK; CKMT     | 3.92E-08   | 2.92E-06   | 2.04783922 |
| FAM173B   | NM_199133.1 | FAM173B   | 5  | Homo sapiens            | FLJ20667        | 0.00024912 | 0.00112577 | 2.0430279  |
| LAMB2     | NM_002292.2 | LAMB2     | 3  | Homo sapiens            | LAMS            | 8.40E-07   | 2.04E-05   | 2.04098489 |
| FAM46B    | NM_052943.2 | FAM46B    | 1  | Homo sapiens            | MGC16491; M     | 4.86E-07   | 1.46E-05   | 2.04089797 |
| NHEDC2    | XM_933390.1 | NHEDC2    | 4  | Homo sapiens            | FLJ23984; NH    | 0.00680977 | 0.0148195  | 2.03977792 |
| IFI6      | NM_002038.2 | IFI6      | 1  | Homo sapiens            | IFI-6-16; 6-16  | 3.45E-10   | 1.70E-07   | 2.03308705 |
| SLC6A9    | NM_201649.2 | SLC6A9    | 1  | Homo sapiens            | DKFZp547A11     | 0.0070691  | 0.01522532 | 2.03206322 |
| PTH2      | NM_178449.2 | PTH2      | 19 | Homo sapiens            | parathyroid hc  | 0.00522577 | 0.01197168 | 2.03033397 |
| MT1F      | NM_005949.1 | MT1F      | 16 | Homo sapiens            | MT1; MGC327     | 7.40E-10   | 2.77E-07   | 2.02406753 |
| FSTL3     | NM_005860.1 | FSTL3     | 19 | Homo sapiens            | FLRG; FSRP      | 0.00013592 | 0.00071567 | 2.01309602 |
| TSPAN13   | NM_014399.3 | TSPAN13   | 7  | Homo sapiens            | FLJ22934; NE    | 3.42E-10   | 1.77E-07   | 2.01307732 |
| EXT1      | NM_000127.2 | EXT1      | 8  | Homo sapiens            | ttv; EXT        | 6.38E-07   | 1.74E-05   | 2.01144263 |
| GRIN1     | NM_000832.5 | GRIN1     | 9  | Homo sapiens            | NMDAR1; NMD     | 2.50E-07   | 9.25E-06   | 2.011252   |



## 2.0 ACL-Independent Upreg

|             |             |              |    |                               |            |            |            |
|-------------|-------------|--------------|----|-------------------------------|------------|------------|------------|
| ZNF227      | NM_182490.1 | ZNF227       | 19 | Homo sapiens zinc finger pro  | 0.0131503  | 0.02485521 | 2.01024625 |
| C14orf133   | NM_022067.2 | C14ORF133    | 14 | Homo sapiens FLJ12707         | 0.00465587 | 0.0109358  | 2.00807602 |
| RRAGC       | NM_022157.2 | RRAGC        | 1  | Homo sapiens FLJ13311; GTI    | 0.0056393  | 0.01270478 | 2.00334488 |
| C2orf7      | NM_032319.1 | C2ORF7       | 2  | Homo sapiens PAP21; MGC1      | 2.19E-05   | 0.0001987  | 2.00103853 |
| SECISBP2L   | NM_014701.2 | SECISBP2L    | 15 | Homo sapiens SECIS binding    | 0.00074138 | 0.00261517 | 1.99985152 |
| C7orf41     | NM_152793.1 | C7ORF41      | 7  | Homo sapiens FLJ25903; Els    | 9.55E-08   | 5.14E-06   | 1.9987279  |
| LOC652097   | XM_941428.1 | LOC652097    |    | PREDICTED: Homo sapiens h     | 8.08E-07   | 1.99E-05   | 1.9953209  |
| TRAPPC2     | NM_00101165 | TRAPPC2      | X  | Homo sapiens hYP38334; TR     | 0.00011634 | 0.0006431  | 1.99268645 |
| PPIL6       | NM_173672.1 | PPIL6        | 6  | Homo sapiens bA425D10.6;      | 0.00023636 | 0.00108434 | 1.98707323 |
| ABHD6       | NM_020676.4 | ABHD6        | 3  | Homo sapiens abhydrolase d    | 1.64E-07   | 7.14E-06   | 1.98657809 |
| FKBP1B      | NM_054033.1 | FKBP1B       | 2  | Homo sapiens FKBP12.6; FKf    | 0.00412107 | 0.00990443 | 1.98187828 |
| HLA-DMA     | NM_006120.2 | HLA-DMA      | 6  | Homo sapiens HLADM; RING      | 1.94E-07   | 8.00E-06   | 1.97694213 |
| PNPLA7      | NM_152286.2 | PNPLA7       | 9  | Homo sapiens FLJ44279; NTL    | 0.00025967 | 0.00116088 | 1.97357775 |
| C17orf28    | NM_030630.1 | C17ORF28     | 17 | Homo sapiens FLJ43526; DM     | 0.00522115 | 0.01196614 | 1.97267921 |
|             | Hs.572495   | HS.572495    | 17 | Homo sapiens cDNA clone IM    | 0.02359391 | 0.03926779 | 1.97261785 |
| KLK8        | NM_144507.1 | KLK8         | 19 | Homo sapiens NRPN; NP; HN     | 0.01633762 | 0.02948476 | 1.97226573 |
| PPP1R13B    | NM_015316.1 | PPP1R13B     | 14 | Homo sapiens p53BP2-like; p   | 1.92E-05   | 0.00017935 | 1.97035474 |
| LOC644128   | XM_927344.1 | LOC644128    | 8  | PREDICTED: Homo sapiens h     | 0.00144175 | 0.00440385 | 1.96662666 |
| MPP2        | NM_005374.3 | MPP2         | 17 | Homo sapiens DKFZp686J21      | 0.007357   | 0.01572078 | 1.96389491 |
| FAM113A     | NM_022760.3 | FAM113A      | 20 | Homo sapiens C20orf81; bA1    | 9.80E-05   | 0.00057179 | 1.96309206 |
| SUZ12P      | XM_934900.1 | SUZ12P       | 17 | PREDICTED: Homo sapiens s     | 0.01052829 | 0.02090654 | 1.96158653 |
| LOC391692   | XM_373031.3 | LOC391692    | 4  | PREDICTED: Homo sapiens s     | 0.00122056 | 0.00384716 | 1.95584796 |
| GDE1        | NM_016641.3 | GDE1         | 16 | Homo sapiens GDE1; 363E6.     | 1.09E-05   | 0.00011797 | 1.95475085 |
| MEGF6       | NM_001409.3 | MEGF6        | 1  | Homo sapiens KIAA0815; EG     | 0.00206596 | 0.00578085 | 1.95338878 |
| RPL28       | NM_000991.3 | RPL28        | 19 | Homo sapiens FLJ43307         | 2.89E-06   | 4.75E-05   | 1.95262261 |
| TMEM175     | NM_032326.2 | TMEM175      | 4  | Homo sapiens MGC4618          | 3.35E-08   | 2.62E-06   | 1.94642888 |
| CAMTA1      | NM_015215.1 | CAMTA1       | 1  | Homo sapiens KIAA0833         | 5.13E-06   | 7.03E-05   | 1.94482423 |
| CASC5       | NM_144508.2 | CASC5        | 15 | Homo sapiens D40; AF15Q14     | 0.01341211 | 0.02525781 | 1.93816519 |
| ST7L        | NM_138729.2 | ST7L         | 1  | Homo sapiens FLJ11657; FLJ    | 0.00045485 | 0.00179172 | 1.93451205 |
| H2AFV       | NM_138635.2 | H2AFV        | 7  | Homo sapiens MGC1947; H2.     | 0.02157255 | 0.03659287 | 1.93360184 |
| TMEM8       | NM_021259.1 | TMEM8        | 16 | Homo sapiens M83; TMEM6       | 0.00022411 | 0.00104711 | 1.9331523  |
| CDC20B      | NM_152623.1 | CDC20B       | 5  | Homo sapiens FLJ37927; G6'    | 0.00271012 | 0.00715936 | 1.93114692 |
| ING5        | XM_941026.1 | ING5         |    | PREDICTED: Homo sapiens ir    | 0.00099478 | 0.00327712 | 1.9264384  |
| SCARNA16    | NR_003013.1 | SCARNA16     | 17 | Homo sapiens ACA47            | 2.29E-06   | 4.08E-05   | 1.9248001  |
| ACTA2       | NM_001613.1 | ACTA2        | 10 | Homo sapiens ACTSA            | 2.65E-07   | 9.63E-06   | 1.92227404 |
| HS1BP3      | NM_022460.3 | HS1BP3       | 2  | Homo sapiens ETM2; FLJ142     | 6.94E-07   | 1.83E-05   | 1.92051058 |
| LOC649970   | XM_939056.1 | LOC649970    |    | PREDICTED: Homo sapiens s     | 1.73E-08   | 1.92E-06   | 1.91799012 |
| TLE6        | NM_024760.1 | TLE6         | 19 | Homo sapiens FLJ14009; MG     | 0.00013295 | 0.00070689 | 1.91679311 |
| C9orf45     | NM_030814.4 | C9ORF45      | 9  | PREDICTED: Homo sapiens c     | 7.23E-05   | 0.00046096 | 1.91651372 |
| LOC10013357 | XM_00171453 | LOC100133578 |    | PREDICTED: Homo sapiens s     | 3.59E-05   | 0.00028392 | 1.91429945 |
| IFT20       | NM_174887.2 | IFT20        | 17 | Homo sapiens intraflagellar t | 0.00044149 | 0.00175306 | 1.9125612  |
| MAP3K12     | NM_006301.2 | MAP3K12      | 12 | Homo sapiens DLK; ZPKP1; Z    | 0.00011739 | 0.00064661 | 1.90555913 |
| PTPRU       | NM_005704.3 | PTPRU        | 1  | Homo sapiens GLEPP1; hPTP     | 2.63E-05   | 0.00022745 | 1.89845282 |
| PPP1R14C    | NM_030949.1 | PPP1R14C     | 6  | Homo sapiens KEPI; NY-BR-8    | 1.36E-07   | 6.44E-06   | 1.89531254 |
| NICN1       | NM_032316.2 | NICN1        | 3  | Homo sapiens MGC12936         | 0.00015279 | 0.00078436 | 1.89429614 |
| MTL5        | NM_00103965 | MTL5         | 11 | Homo sapiens TESMIN; MTLT     | 0.00318236 | 0.00810353 | 1.8938739  |
| MOSPD1      | NM_019556.1 | MOSPD1       | X  | Homo sapiens DJ473B4          | 1.89E-06   | 3.55E-05   | 1.88613075 |
| UNC13B      | NM_006377.2 | UNC13B       | 9  | Homo sapiens hmunc13; Unc     | 0.01689622 | 0.0302169  | 1.8858212  |
| C12orf4     | NM_020374.2 | C12ORF4      | 12 | Homo sapiens FLJ23899; FLJ    | 0.00882553 | 0.01817621 | 1.88262008 |
| NEDD4L      | NM_015277.2 | NEDD4L       | 18 | Homo sapiens FLJ33870; KIA    | 0.00020105 | 0.00096598 | 1.88100851 |
| RGS22       | NM_015668.2 | RGS22        | 8  | Homo sapiens MGC102908; I     | 0.02804187 | 0.04485048 | 1.86988868 |
| MAPT        | NM_016841.2 | MAPT         | 17 | Homo sapiens MTBT2; MAPTI     | 3.99E-06   | 5.97E-05   | 1.86917589 |
| LOC653108   | XM_930914.1 | LOC653108    | 21 | PREDICTED: Homo sapiens s     | 0.00301889 | 0.00778392 | 1.86915953 |
| C6orf203    | NM_016487.2 | C6ORF203     | 6  | Homo sapiens RP11-5919.1;     | 1.25E-06   | 2.68E-05   | 1.86452202 |
| FBXO41      | Hs.23158    | FBXO41       | 2  | Homo sapiens FLJ37709; Fb>    | 0.0088667  | 0.01824026 | 1.86410863 |
| C14orf79    | NM_174891.2 | C14ORF79     | 14 | Homo sapiens chromosome J     | 0.00021386 | 0.00101143 | 1.8615851  |
| TP53INP1    | NM_033285.2 | TP53INP1     | 8  | Homo sapiens TP53INP1A; T     | 7.39E-08   | 4.44E-06   | 1.86104813 |
| ULBP2       | NM_025217.2 | ULBP2        | 6  | Homo sapiens RAET1H; N2DI     | 3.93E-07   | 1.26E-05   | 1.86073695 |
| CYTH1       | NM_017456.2 | CYTH1        | 17 | Homo sapiens FLJ41900; D1'    | 2.06E-05   | 0.00018948 | 1.85085847 |
| NES         | NM_006617.1 | NES          | 1  | Homo sapiens FLJ21841; Nbl    | 3.98E-05   | 0.00030463 | 1.85014504 |
| C5orf13     | NM_004772.1 | C5ORF13      | 5  | Homo sapiens PTZ17; D4S11     | 0.02367923 | 0.0393736  | 1.8470298  |
| ZSWIM6      | XM_035299.7 | ZSWIM6       | 5  | PREDICTED: Homo sapiens z     | 6.03E-06   | 7.89E-05   | 1.84313426 |
| ANKRD20A1   | NM_00101242 | ANKRD20A1    |    | Homo sapiens DKFZp434A17      | 8.54E-06   | 1.00E-04   | 1.8424366  |
| REEP1       | NM_022912.1 | REEP1        | 2  | Homo sapiens SPG31; C2orf     | 5.14E-07   | 1.51E-05   | 1.8413591  |
| LOC10013151 | XM_00172289 | LOC100131512 |    | PREDICTED: Homo sapiens h     | 0.00851911 | 0.01765891 | 1.84107976 |
| TBC1D16     | NM_019020.2 | TBC1D16      | 17 | Homo sapiens FLJ20748; MG     | 0.00015195 | 0.00078152 | 1.83657301 |
| ITFG3       | NM_032039.1 | ITFG3        | 16 | Homo sapiens FLJ32603; DK     | 2.40E-06   | 4.18E-05   | 1.83512242 |
| TMEM145     | NM_173633.1 | TMEM145      | 19 | Homo sapiens FLJ90805         | 6.23E-05   | 0.00041534 | 1.82506686 |
| RBM43       | NM_198557.2 | RBM43        | 2  | Homo sapiens RNA binding r    | 0.01371286 | 0.0256862  | 1.82143986 |
| LRRC20      | NM_207119.1 | LRRC20       | 10 | Homo sapiens FLJ10751; FLJ    | 5.19E-08   | 3.62E-06   | 1.81913133 |

## 2.0 ACL-Independent Upreg

|           |                         |   |                                |            |            |            |
|-----------|-------------------------|---|--------------------------------|------------|------------|------------|
| CBR4      | NM_032783.3 CBR4        |   | 4 Homo sapiens FLJ14431        | 3.64E-06   | 5.59E-05   | 1.8162221  |
| ZC3H10    | NM_032786.1 ZC3H10      |   | 12 Homo sapiens FLJ14451; ZC:  | 0.00072447 | 0.00257136 | 1.8154227  |
|           | Hs.535044 HS.535044     |   | PREDICTED: Homo sapiens s      | 0.01235439 | 0.02371379 | 1.81521033 |
| GOLPH4    | NM_014498.2 GOLPH4      |   | 3 Homo sapiens P138; GIMPC;    | 0.00066292 | 0.00239674 | 1.81425133 |
| RNU1-3    | NR_004408.1 RNU1-3      |   | 1 Homo sapiens U1C21           | 1.84E-06   | 3.48E-05   | 1.8129596  |
| OSGEPL1   | NM_022353.1 OSGEPL1     |   | 2 Homo sapiens O-sialoglycopr  | 0.00905624 | 0.01854243 | 1.81130184 |
| FTO       | NM_00108043 FTO         |   | 16 Homo sapiens KIAA1752; MC   | 0.0006131  | 0.00226949 | 1.80895685 |
| GAA       | NM_000152.2 GAA         |   | 17 Homo sapiens LYAG           | 1.32E-05   | 0.00013457 | 1.80519712 |
| AMOT      | NM_133265.2 AMOT        | X | Homo sapiens KIAA1071          | 0.00045787 | 0.00179837 | 1.80083544 |
| CLDN14    | NM_144492.1 CLDN14      |   | 21 Homo sapiens DFNB29         | 0.00156504 | 0.00469728 | 1.79919729 |
| GPR108    | NM_00108045 GPR108      |   | 19 Homo sapiens LUSTR2; MGC    | 9.39E-05   | 0.00055395 | 1.79815968 |
| CNFN      | NM_032488.2 CNFN        |   | 19 Homo sapiens PLAC8L2        | 3.96E-06   | 5.96E-05   | 1.79628625 |
| FAM116B   | NM_00100179 FAM116B     |   | Homo sapiens MGC33692          | 1.29E-05   | 0.00013248 | 1.79392442 |
| FAM13B    | NM_00110180 FAM13B      |   | 5 Homo sapiens KHCHP; MGC5     | 3.21E-07   | 1.08E-05   | 1.79246018 |
| PHTF1     | NM_006608.1 PHTF1       |   | 1 Homo sapiens PHTF            | 4.67E-06   | 6.62E-05   | 1.7869743  |
| LOC652850 | XM_946103.1 LOC652850   |   | PREDICTED: Homo sapiens h      | 0.01001228 | 0.0201134  | 1.78662825 |
| TMEM184A  | NM_152689.2 TMEM184A    |   | 7 Homo sapiens MGC9712; FLJ    | 0.01676732 | 0.03009532 | 1.78424456 |
| LPPR2     | NM_022737.1 LPPR2       |   | 19 Homo sapiens FLJ13055; DK   | 0.00087642 | 0.0029645  | 1.78362734 |
| SNAP29    | NM_004782.2 SNAP29      |   | 22 Homo sapiens CEDNIK; SNAI   | 5.75E-05   | 0.00039378 | 1.78321522 |
| LOC653438 | XM_929895.1 LOC653438   |   | 1 PREDICTED: Homo sapiens s    | 8.08E-05   | 0.0004979  | 1.78174362 |
| CPLX1     | NM_006651.3 CPLX1       |   | 4 Homo sapiens CPX-1; CPX1     | 0.00218486 | 0.00602055 | 1.78069981 |
|           | Hs.4988 HS.4988         |   | 2 Homo sapiens mRNA; cDNA l    | 3.39E-07   | 1.13E-05   | 1.7798259  |
| MAGEE1    | NM_020932.1 MAGEE1      | X | Homo sapiens KIAA1587; HC      | 0.0057698  | 0.01295316 | 1.7777214  |
| KRTAP2-2  | XM_496261.2 KRTAP2-2    |   | PREDICTED: Homo sapiens k      | 0.00099762 | 0.0032855  | 1.77759191 |
| PCYOX1L   | NM_024028.2 PCYOX1L     |   | 5 Homo sapiens MGC3265         | 0.00028884 | 0.00126119 | 1.77626631 |
| SCARNA9   | NR_002569.1 SCARNA9     |   | 11 Homo sapiens Z32; mgU2-19   | 8.81E-07   | 2.10E-05   | 1.77605458 |
| KIAA1024  | NM_015206.1 KIAA1024    |   | 15 Homo sapiens KIAA1024 (KI   | 0.00062537 | 0.00229845 | 1.77208941 |
| SKAP2     | NM_003930.3 SKAP2       |   | 7 Homo sapiens RA70; SCAP2;    | 1.66E-06   | 3.31E-05   | 1.7703235  |
| RCOR2     | NM_173587.2 RCOR2       |   | 11 Homo sapiens REST corepres  | 8.12E-05   | 0.0004985  | 1.76633871 |
| LRRC3     | NM_030891.3 LRRC3       |   | 21 Homo sapiens C21orf102      | 0.01357642 | 0.02548335 | 1.7648632  |
| ZCCHC24   | NM_153367.1 ZCCHC24     |   | 10 Homo sapiens FLJ90798       | 0.00131727 | 0.00408564 | 1.76401085 |
| CDKN1C    | NM_000076.1 CDKN1C      |   | 11 Homo sapiens WBCR; p57; B   | 0.00090814 | 0.0030509  | 1.76336403 |
| YPEL5     | NM_016061.1 YPEL5       |   | 2 Homo sapiens CGI-127         | 6.74E-08   | 4.21E-06   | 1.76087858 |
| NUDT7     | NM_00110566 NUDT7       |   | 16 Homo sapiens nudix (nucleos | 2.20E-07   | 8.64E-06   | 1.75288795 |
| ZDHHC11   | XM_940764.1 ZDHHC11     |   | 5 Homo sapiens ZNF399; FLJ1:   | 0.00107956 | 0.00349917 | 1.75106516 |
| SLC29A4   | NM_00104066 SLC29A4     |   | 7 Homo sapiens PMAT; FLJ349;   | 1.67E-07   | 7.20E-06   | 1.74947355 |
| IFT52     | NM_016004.2 IFT52       |   | 20 Homo sapiens NGD5; CGI-53   | 7.93E-05   | 0.00049233 | 1.74860143 |
| GLB1L2    | NM_138342.2 GLB1L2      |   | 11 Homo sapiens MST114; MSTI   | 7.31E-06   | 9.03E-05   | 1.74647903 |
| LOC646786 | XM_929738.1 LOC646786   |   | 6 PREDICTED: Homo sapiens s    | 0.00025359 | 0.00113883 | 1.74368531 |
| ARL4A     | NM_00103716 ARL4A       |   | 7 Homo sapiens ARL4            | 1.89E-05   | 0.00017729 | 1.74366772 |
| ZNF174    | NM_00103229 ZNF174      |   | 16 Homo sapiens ZSCAN8         | 0.02168984 | 0.03674021 | 1.74357317 |
| PBX3      | NM_006195.4 PBX3        |   | 9 Homo sapiens pre-B-cell leuk | 2.37E-06   | 4.15E-05   | 1.74328646 |
| LOC441268 | NM_00101372 LOC441268   |   | 7 Homo sapiens hypothetical g  | 0.01653685 | 0.0297603  | 1.74290557 |
| ACAA2     | NM_006111.1 ACAA2       |   | 18 Homo sapiens DSAEC          | 0.00011275 | 0.00062839 | 1.74061554 |
| CIB2      | NM_006383.2 CIB2        |   | 15 Homo sapiens KIP2           | 0.0019425  | 0.00551779 | 1.74030217 |
| DGCR14    | NM_022719.1 DGCR14      |   | 22 Homo sapiens ES2; DGSI; D   | 0.00242715 | 0.00656177 | 1.73954428 |
| GNG7      | NM_052847.1 GNG7        |   | 19 Homo sapiens FLJ00058       | 2.79E-07   | 9.96E-06   | 1.73565631 |
| CADM4     | NM_145296.1 CADM4       |   | 19 Homo sapiens Necl-4; TSL2   | 3.60E-05   | 0.00028437 | 1.7333099  |
| GCA       | NM_012198.2 GCA         |   | 2 Homo sapiens GCL             | 1.66E-07   | 7.19E-06   | 1.73069507 |
| AK1       | NM_000476.1 AK1         |   | 9 Homo sapiens adenylate kin   | 4.75E-06   | 6.67E-05   | 1.73012192 |
| NEURL1B   | NM_00114265 NEURL1B     |   | 5 Homo sapiens neuralized hor  | 1.34E-06   | 2.82E-05   | 1.72890925 |
| MXRA7     | NM_00100852 MXRA7       |   | 17 Homo sapiens TMAP1; PS1TF   | 4.10E-05   | 0.00031258 | 1.72756174 |
| LOC728229 | XM_943555.1 LOC728229   |   | 22 PREDICTED: Homo sapiens h   | 0.00288755 | 0.00752563 | 1.72733568 |
| CGNL1     | NM_032866.3 CGNL1       |   | 15 Homo sapiens MGC138254; ;   | 8.07E-06   | 9.61E-05   | 1.72258343 |
| FAM195B   | NM_207368.1 FAM195B     |   | 17 Homo sapiens DKFZp686A17    | 4.53E-05   | 0.00033548 | 1.72054385 |
| ABCG4     | NM_022169.3 ABCG4       |   | 11 Homo sapiens WHITE2         | 0.00091902 | 0.0030827  | 1.71856019 |
| HLA-DRB3  | NM_022555.3 HLA-DRB3    |   | 6 Homo sapiens MGC117330; I    | 4.05E-06   | 6.02E-05   | 1.7146002  |
| ABHD12    | NM_00104247 ABHD12      |   | 20 Homo sapiens DKFZP434P10    | 0.00017589 | 0.00087289 | 1.71429654 |
| MYLIP     | NM_013262.3 MYLIP       |   | 6 Homo sapiens MIR             | 3.29E-08   | 2.59E-06   | 1.71353766 |
|           | 3-Sep NM_019106.4 3-Sep |   | 22 Homo sapiens SEP3; MGC13:   | 1.94E-07   | 7.97E-06   | 1.71282114 |
| CTSH      | NM_004390.2 CTSH        |   | 15 Homo sapiens CPSB; ACC-4;   | 7.87E-06   | 9.45E-05   | 1.7127535  |
| SLC25A20  | XM_941287.1 SLC25A20    |   | PREDICTED: Homo sapiens s      | 0.01535859 | 0.02808162 | 1.70778189 |
| POLR3H    | NM_00101805 POLR3H      |   | 22 Homo sapiens RPC8; MGC29:   | 0.00012149 | 0.00066281 | 1.70453856 |
| BEND6     | NM_152731.2 BEND6       |   | 6 Homo sapiens bA203B9.1; Fl   | 0.00102598 | 0.0033636  | 1.70038856 |
| GK5       | NM_152776.1 GK5         |   | 3 Homo sapiens MGC40579; J     | 0.01271819 | 0.02424509 | 1.70008112 |
| STAT3     | NM_213662.1 STAT3       |   | 17 Homo sapiens APRF; FLJ208:  | 6.12E-07   | 1.68E-05   | 1.69791623 |
| LOC643031 | XM_926402.1 LOC643031   |   | 5 PREDICTED: Homo sapiens s    | 7.18E-07   | 1.84E-05   | 1.69690265 |
| F8A1      | NM_012151.3 F8A1        | X | Homo sapiens DXS522E; HAI      | 0.0274065  | 0.04402865 | 1.6917907  |
| VASN      | NM_138440.1 VASN        |   | 16 Homo sapiens SLITL2         | 1.20E-07   | 6.06E-06   | 1.68882082 |
| TBC1D7    | NM_016495.2 TBC1D7      |   | 6 Homo sapiens DKFZp686N23     | 3.43E-06   | 5.39E-05   | 1.68840029 |

## 2.0 ACL-Independent Upreg

|           |                       |                                 |            |            |            |
|-----------|-----------------------|---------------------------------|------------|------------|------------|
| RABAC1    | NM_006423.1 RABAC1    | 19 Homo sapiens PRAF1; PRA1;    | 5.51E-06   | 7.42E-05   | 1.68834694 |
| C11orf67  | NM_024684.2 C11ORF67  | 11 Homo sapiens FLJ21035; MG    | 2.53E-07   | 9.33E-06   | 1.68625439 |
| SPIRE2    | NM_032451.1 SPIRE2    | 16 Homo sapiens MGC117166; S    | 0.00016697 | 0.00083818 | 1.68491719 |
| RNU1G2    | NR_004426.1 RNU1G2    | 1 Homo sapiens U1D2; U1B2;      | 1.35E-07   | 6.43E-06   | 1.68308448 |
| MPZL1     | NM_024569.3 MPZL1     | 1 Homo sapiens PZR; PZRα; PZ    | 4.36E-06   | 6.32E-05   | 1.67894263 |
|           | Hs.291319 HS.291319   | Homo sapiens mRNA; cDNA l       | 0.00103939 | 0.00339529 | 1.6762746  |
| CITED2    | NM_006079.3 CITED2    | 6 Homo sapiens P35SRJ; MRG1     | 2.39E-08   | 2.20E-06   | 1.67625415 |
| ATXN1     | NM_000332.2 ATXN1     | 6 Homo sapiens SCA1; D6S504     | 1.31E-05   | 0.000134   | 1.67235785 |
| PTPN13    | NM_080684.1 PTPN13    | 4 Homo sapiens PTP1E; PNP1;     | 0.0195748  | 0.03388642 | 1.67077435 |
| MTF1      | NM_005955.1 MTF1      | 1 Homo sapiens MGC23036; ZI     | 5.88E-05   | 0.00039911 | 1.66986951 |
| SCARNA8   | NR_003009.1 SCARNA8   | 9 Homo sapiens U92              | 3.26E-08   | 2.58E-06   | 1.66974182 |
| SORT1     | NM_002959.4 SORT1     | 1 Homo sapiens NT3; Gp95        | 2.11E-07   | 8.42E-06   | 1.66866526 |
| LOC729495 | XR_015564.1 LOC729495 | 22 PREDICTED: Homo sapiens s    | 5.28E-06   | 7.18E-05   | 1.6685761  |
| LOC649917 | XR_036859.1 LOC649917 | PREDICTED: Homo sapiens n       | 0.00075369 | 0.00264657 | 1.66790998 |
| FOXO1     | NM_002015.2 FOXO1     | 13 Homo sapiens FKHR; FKH1; I   | 0.00959839 | 0.0194473  | 1.66789074 |
| SLC25A30  | NM_00101087.SLC25A30  | 13 Homo sapiens KMCP1           | 4.76E-05   | 0.00034714 | 1.66390084 |
| TSPAN33   | NM_178562.2 TSPAN33   | 7 Homo sapiens MGC50844; Pt     | 0.00010466 | 0.00059706 | 1.66346107 |
| GRPR      | NM_005314.2 GRPR      | Homo sapiens gastrin-releasi    | 0.01157247 | 0.02255149 | 1.65950219 |
| RHOA      | NM_021205.4 RHOA      | 1 Homo sapiens WRCH1; CDC4      | 0.00375967 | 0.00925483 | 1.6567435  |
| SIPA1L2   | NM_020808.1 SIPA1L2   | 1 Homo sapiens SPAL2; FLJ231    | 5.20E-06   | 7.11E-05   | 1.65601376 |
| FLJ22795  | NM_025084.1 FLJ22795  | 15 Homo sapiens hypothetical p  | 2.83E-06   | 4.68E-05   | 1.65566573 |
| NKX3-1    | NM_006167.2 NKX3-1    | 8 Homo sapiens NKX3A; BAPX;     | 1.49E-06   | 3.04E-05   | 1.654928   |
| U1SNRNPBP | NM_180703.1 U1SNRNPBP | 12 Homo sapiens MGC138160; I    | 0.00356662 | 0.00887206 | 1.65398078 |
| SPRY1     | NM_005841.1 SPRY1     | 4 Homo sapiens hSPRY1           | 0.0177185  | 0.03131133 | 1.65337374 |
| APLP2     | NM_001642.1 APLP2     | 11 Homo sapiens CDEBP; APPH;    | 2.11E-07   | 8.45E-06   | 1.6527375  |
| WIPI1     | NM_017983.3 WIPI1     | Homo sapiens WIPI49; FLJ10      | 5.91E-06   | 7.78E-05   | 1.65154722 |
| PEX6      | NM_000287.2 PEX6      | 6 Homo sapiens PAF-2; PAF2; I   | 3.37E-05   | 0.00026933 | 1.65134712 |
| MAP1LC3B  | NM_022818.3 MAP1LC3B  | 16 Homo sapiens MAP1A/1BLC3     | 7.19E-09   | 1.18E-06   | 1.65078257 |
| GMPR      | NM_006877.2 GMPR      | 6 Homo sapiens GMPR1            | 6.28E-05   | 0.00041723 | 1.6488767  |
| FAM149B1  | NM_173348.1 FAM149B1  | 10 Homo sapiens family with se  | 0.0001124  | 0.00062738 | 1.64675534 |
| TPMT      | NM_000367.2 TPMT      | 6 Homo sapiens thiopurine S-n   | 3.40E-06   | 5.37E-05   | 1.64143147 |
| BAMBI     | NM_012342.2 BAMBI     | 10 Homo sapiens NMA             | 5.02E-09   | 9.41E-07   | 1.64073468 |
| IRS2      | NM_003749.2 IRS2      | 13 Homo sapiens insulin receptc | 0.00019957 | 0.00096013 | 1.63872999 |
| SLC7A11   | NM_014331.2 SLC7A11   | 4 Homo sapiens CCBR1; xCT       | 0.00072294 | 0.00256847 | 1.63782858 |
| EIF4E3    | NM_173359.3 EIF4E3    | 3 Homo sapiens MGC86971; M      | 0.00014039 | 0.00073389 | 1.63701502 |
| GALT      | NM_000155.2 GALT      | 9 Homo sapiens galactose-1-pt   | 0.00722399 | 0.01547916 | 1.63330916 |
| ASAP2     | NM_003887.2 ASAP2     | 2 Homo sapiens ArfGAP with Sl   | 5.22E-06   | 7.13E-05   | 1.63314219 |
| SLC44A3   | NM_152369.2 SLC44A3   | 1 Homo sapiens CTL3; MGC454     | 6.80E-05   | 0.00044323 | 1.63296417 |
| CBX7      | NM_175709.2 CBX7      | 22 Homo sapiens chromobox ho    | 4.74E-05   | 0.00034641 | 1.63215705 |
| LRRC45    | NM_144999.2 LRRC45    | 17 Homo sapiens MGC20806        | 0.00015334 | 0.00078682 | 1.63169698 |
| POLR2L    | NM_021128.3 POLR2L    | 11 Homo sapiens hSRPB10b; RP    | 8.60E-06   | 0.00010029 | 1.63076703 |
| IRF2BP2   | NM_182972.1 IRF2BP2   | 1 Homo sapiens MGC72189         | 1.43E-05   | 0.00014373 | 1.62764386 |
| ABL2      | NM_005158.2 ABL2      | 1 Homo sapiens FLJ31718; ABI    | 0.00451781 | 0.01068543 | 1.62563416 |
| FYCO1     | NM_024513.1 FYCO1     | 3 Homo sapiens FLJ13335; RU     | 7.39E-07   | 1.87E-05   | 1.62377783 |
| ZBTB46    | NM_025224.2 ZBTB46    | 20 Homo sapiens BTBD4; ZNF34    | 7.94E-05   | 0.00049255 | 1.62102885 |
| SLC9A1    | NM_003047.2 SLC9A1    | 1 Homo sapiens APNH; FLJ422     | 1.35E-05   | 0.00013703 | 1.6188983  |
| DDAH2     | NM_013974.1 DDAH2     | 6 Homo sapiens DDAHII; NG30     | 0.03013728 | 0.0472629  | 1.61772205 |
| LOC645094 | XR_039085.1 LOC645094 | PREDICTED: Homo sapiens n       | 3.30E-06   | 5.24E-05   | 1.61574922 |
| RNU1A3    | NR_004430.1 RNU1A3    | 1 Homo sapiens HSD1; U1A1       | 8.76E-08   | 4.96E-06   | 1.61495333 |
| C7orf36   | NM_020192.1 C7ORF36   | 7 Homo sapiens GK003            | 0.0001881  | 0.00091715 | 1.61424141 |
| NAGK      | NM_017567.2 NAGK      | 2 Homo sapiens GNK; HSA242'     | 2.06E-07   | 8.37E-06   | 1.61239725 |
| ZNRF3     | XM_945269.1 ZNRF3     | 22 Homo sapiens RNF203; BK74    | 0.004244   | 0.01014156 | 1.61153941 |
| GNGT1     | NM_021955.3 GNGT1     | 7 Homo sapiens GNG1             | 0.02676178 | 0.04322934 | 1.60948836 |
| PLSCR4    | NM_020353.1 PLSCR4    | 3 Homo sapiens phospholipid s   | 0.00037202 | 0.00153616 | 1.60935684 |
| MAP2K3    | NM_145109.1 MAP2K3    | 17 Homo sapiens MAPKK3; PRKI    | 0.00179339 | 0.00520164 | 1.60717072 |
| HABP4     | NM_014282.1 HABP4     | 9 Homo sapiens SERBP1L; IHA     | 1.59E-07   | 6.96E-06   | 1.60704019 |
| RBM20     | XM_291671.6 RBM20     | PREDICTED: Homo sapiens R       | 0.03101346 | 0.0482955  | 1.60590629 |
| TRIM68    | NM_018073.5 TRIM68    | 11 Homo sapiens MGC126176; S    | 0.00072479 | 0.00257166 | 1.60354723 |
| SNORD3D   | NR_006882.1 SNORD3D   | 17 Homo sapiens U3-4            | 4.33E-07   | 1.33E-05   | 1.60041916 |
| B4GALNT4  | NM_178537.3 B4GALNT4  | 11 Homo sapiens Beta4GalNAC-1   | 0.00961783 | 0.01947579 | 1.60024043 |
| KIFAP3    | NM_014970.2 KIFAP3    | 1 Homo sapiens SMAP; Smg-G      | 7.85E-06   | 9.45E-05   | 1.59948174 |
| CEBPA     | NM_004364.2 CEBPA     | 19 Homo sapiens CEBP; C/EBP-    | 0.00118035 | 0.00375418 | 1.59534851 |
| IGSF3     | NM_001542.2 IGSF3     | 1 Homo sapiens V8; EWI-3; M     | 3.65E-08   | 2.77E-06   | 1.59489298 |
| ATE1      | NM_007041.2 ATE1      | 10 Homo sapiens MGC26724        | 0.00352507 | 0.00879487 | 1.59459026 |
| TPM1      | NM_00101800 TPM1      | 15 Homo sapiens TPM1-alpha; T   | 0.00177304 | 0.00516744 | 1.59189801 |
| FAM105A   | NM_019018.1 FAM105A   | 5 Homo sapiens FLJ11127         | 0.01503018 | 0.02759722 | 1.59098838 |
| SEC22B    | NM_004892.3 SEC22B    | 1 Homo sapiens SEC22L1; ERS     | 6.53E-06   | 8.40E-05   | 1.58990926 |
| HSPA4L    | NM_014278.2 HSPA4L    | 4 Homo sapiens Osp94; APG-1     | 5.69E-05   | 0.00039179 | 1.5896848  |
| ARID5B    | NM_032199.1 ARID5B    | 10 Homo sapiens MRF2; FLJ211    | 8.77E-06   | 0.00010153 | 1.58936394 |
| MT2A      | NM_005953.2 MT2A      | 16 Homo sapiens MT2             | 7.57E-07   | 1.90E-05   | 1.58883782 |

## 2.0 ACL-Independent Upreg

|             |                         |   |                                 |            |            |            |
|-------------|-------------------------|---|---------------------------------|------------|------------|------------|
| PLXNA1      | NM_032242.2 PLXNA1      |   | 3 Homo sapiens NOV; PLXN1; I    | 0.00020134 | 0.00096648 | 1.58469135 |
| PIGH        | NM_004569.2 PIGH        |   | 14 Homo sapiens GPI-H           | 6.10E-06   | 7.94E-05   | 1.58327276 |
| CDK5        | NM_004935.2 CDK5        |   | 7 Homo sapiens PSSALRE          | 5.70E-07   | 1.60E-05   | 1.582663   |
| TMSB15A     | NM_021992.2 TMSB15A     | X | Homo sapiens Tb15; TMSNB;       | 6.98E-10   | 2.71E-07   | 1.57986181 |
|             | Hs.363526 HS.363526     |   | 8 Homo sapiens cDNA clone IM    | 4.34E-07   | 1.33E-05   | 1.57982965 |
| CXorf57     | NM_018015.3 CXORF57     | X | Homo sapiens RP11-647M7.1       | 1.56E-05   | 0.00015342 | 1.57949789 |
| GSDMB       | NM_018530.1 GSDMB       |   | 17 Homo sapiens PRO2521; PP4    | 2.59E-07   | 9.44E-06   | 1.57565576 |
| DHDH        | NM_014475.2 DHDH        |   | 19 Homo sapiens HUM2DD          | 7.67E-05   | 0.00048039 | 1.57324699 |
| LGMM        | NM_005606.5 LGMM        |   | 14 Homo sapiens AEP; LGMM1; I   | 2.72E-07   | 9.79E-06   | 1.57103315 |
| UPLP        | NM_00111440 UPLP        |   | Homo sapiens uroplakin-like     | 6.91E-07   | 1.82E-05   | 1.56997016 |
| CTSD        | NM_001909.3 CTSD        |   | 11 Homo sapiens CLN10; MGC2.    | 6.90E-05   | 0.00044665 | 1.56960758 |
| TMEM30A     | NM_018247.2 TMEM30A     |   | 6 Homo sapiens FLJ10856; C6c    | 2.99E-06   | 4.87E-05   | 1.56950233 |
| LOC440731   | XM_933693.1 LOC440731   |   | 1 PREDICTED: Homo sapiens h     | 7.28E-07   | 1.85E-05   | 1.56927924 |
| ZDHHC18     | NM_032283.1 ZDHHC18     |   | 1 Homo sapiens DKFZp667O24      | 0.02915643 | 0.0461509  | 1.56897772 |
| SH3PXD2A    | NM_014631.2 SH3PXD2A    |   | 10 Homo sapiens SH3MD1; FIS     | 1.74E-05   | 0.0001666  | 1.56581453 |
| C11orf74    | NM_138787.2 C11ORF74    |   | 11 Homo sapiens FLJ38678        | 6.42E-07   | 1.73E-05   | 1.56533394 |
| SOX8        | NM_014587.2 SOX8        |   | 16 Homo sapiens MGC24837        | 1.33E-05   | 0.00013504 | 1.56527993 |
| SLC25A29    | NM_00103935 SLC25A29    |   | 14 Homo sapiens CACL; C14orf    | 0.0128273  | 0.02440174 | 1.56366264 |
| CSRNP2      | NM_030809.1 CSRNP2      |   | 12 Homo sapiens FLJ25576; C1:   | 6.44E-05   | 0.00042587 | 1.5622261  |
| LOC402509   | XM_935493.1 LOC402509   |   | PREDICTED: Homo sapiens s       | 3.31E-05   | 0.00026689 | 1.56213991 |
| GPC4        | NM_001448.2 GPC4        | X | Homo sapiens K-glypican         | 1.76E-06   | 3.41E-05   | 1.5619591  |
| ACY1        | NM_000666.1 ACY1        |   | 3 Homo sapiens ACY1D; ACYL      | 0.00012061 | 0.00065971 | 1.56114094 |
| GBF1        | NM_004193.1 GBF1        |   | 10 Homo sapiens KIAA0248; MC    | 0.00078605 | 0.00272412 | 1.56093912 |
|             | Hs.551538 HS.551538     |   | 7 Homo sapiens mRNA; cDNA I     | 3.46E-06   | 5.41E-05   | 1.55971214 |
| SYN2        | NM_003178.3 SYN2        |   | 3 Homo sapiens SYN1a; SYNII     | 0.00387597 | 0.00946395 | 1.55851964 |
| GLCE        | NM_015554.1 GLCE        |   | 15 Homo sapiens KIAA0836; HS    | 1.79E-07   | 7.53E-06   | 1.55669052 |
| PMS2L4      | NR_022007.1 PMS2L4      |   | 7 Homo sapiens postmeiotic se   | 4.79E-05   | 0.00034875 | 1.55657966 |
| FAM108A2    | XM_00172466 FAM108A2    |   | PREDICTED: Homo sapiens f       | 3.63E-05   | 0.00028589 | 1.55514998 |
| LEPRE1      | NM_022356.2 LEPRE1      |   | 1 Homo sapiens P3H1; MGC11      | 5.80E-05   | 0.0003954  | 1.5549586  |
| VPS16       | NM_080413.1 VPS16       |   | 20 Homo sapiens hVPS16          | 1.35E-05   | 0.00013713 | 1.5543275  |
| NOXA1       | NM_006647.1 NOXA1       |   | 9 Homo sapiens MGC131800; I     | 7.13E-05   | 0.00045711 | 1.55394721 |
| HSDL1       | NM_031463.3 HSDL1       |   | 16 Homo sapiens MGC125994; I    | 0.00033008 | 0.00140237 | 1.55201777 |
| RAB11FIP3   | NM_014700.2 RAB11FIP3   |   | 16 Homo sapiens KIAA0665; Ra    | 0.00025496 | 0.00114359 | 1.55195356 |
| SNORD83B    | NR_000028.1 SNORD83B    |   | 22 Homo sapiens U83B; RNU83I    | 0.00032229 | 0.00137628 | 1.55167359 |
| TUBB4       | NM_006087.2 TUBB4       |   | 19 Homo sapiens TUBB5; beta-5   | 6.49E-07   | 1.74E-05   | 1.54697125 |
| CLEC16A     | NM_015226.1 CLEC16A     |   | 16 Homo sapiens KIAA0350; Go    | 2.30E-06   | 4.09E-05   | 1.54596864 |
| AP1B1       | NM_145730.1 AP1B1       |   | 22 Homo sapiens CLAPB2; ADTE    | 4.60E-06   | 6.56E-05   | 1.54572638 |
| TTYH3       | NM_025250.2 TTYH3       |   | 7 Homo sapiens KIAA1691         | 0.00012233 | 0.00066474 | 1.54409945 |
| TBC1D2B     | NM_015079.2 TBC1D2B     |   | 15 Homo sapiens KIAA1055; FL    | 0.00014379 | 0.00074948 | 1.54402876 |
| ZNF503      | NM_032772.4 ZNF503      |   | 10 Homo sapiens zinc finger pro | 5.46E-07   | 1.57E-05   | 1.54334442 |
| CCDC3       | NM_031455.2 CCDC3       |   | 10 Homo sapiens FLJ20925; DK    | 0.00151959 | 0.00459384 | 1.54239728 |
| PPM1H       | XM_939302.1 PPM1H       |   | 12 Homo sapiens KIAA1157; FL    | 2.31E-05   | 0.0002061  | 1.53977854 |
| HCCS        | NM_005333.2 HCCS        | X | Homo sapiens MCOPS7; DKF        | 9.98E-05   | 0.00057747 | 1.53962015 |
|             | Hs.159057 HS.159057     |   | 22 Homo sapiens hypothetical p  | 0.02241677 | 0.03770708 | 1.53895715 |
| ADARB1      | NM_00103304 ADARB1      |   | 21 Homo sapiens ADAR2a; ADA     | 0.00054144 | 0.00205317 | 1.538464   |
| HES1        | NM_005524.2 HES1        |   | 3 Homo sapiens HHL; FLJ2040:    | 5.63E-05   | 0.00038998 | 1.53811192 |
| TIMP2       | XM_941104.1 TIMP2       |   | PREDICTED: Homo sapiens T       | 4.28E-09   | 8.77E-07   | 1.53742597 |
| KDM5B       | NM_006618.3 KDM5B       |   | 1 Homo sapiens FLJ23670; FLJ    | 1.67E-05   | 0.00016187 | 1.53666598 |
| DKK1        | NM_012242.2 DKK1        |   | 10 Homo sapiens DKK-1; SK       | 2.46E-08   | 2.20E-06   | 1.53651697 |
| NDFIP1      | NM_030571.2 NDFIP1      |   | 5 Homo sapiens N4WBP5; MGC      | 0.01523785 | 0.02788902 | 1.5362503  |
| TMEM98      | NM_015544.2 TMEM98      |   | 17 Homo sapiens DKFZP564K19     | 7.25E-07   | 1.85E-05   | 1.53596625 |
| PSMA2       | NM_002787.3 PSMA2       |   | 7 Homo sapiens HC3; MU; PSC     | 4.54E-06   | 6.50E-05   | 1.53338892 |
| RN5S9       | NR_023371.1 RN5S9       |   | 1 Homo sapiens RNA, 5S ribos    | 4.90E-05   | 0.00035281 | 1.5325845  |
| SNTA1       | NM_003098.2 SNTA1       |   | 20 Homo sapiens SNT1; dJ1187.   | 0.00077469 | 0.00269505 | 1.53163563 |
| VRK3        | NM_00102577 VRK3        |   | 19 Homo sapiens vaccinia relate | 0.00322977 | 0.00819547 | 1.53000087 |
| WNT3A       | NM_033131.2 WNT3A       |   | 1 Homo sapiens MGC119419; I     | 0.00151961 | 0.00459264 | 1.52974656 |
| SLC25A44    | NM_014655.1 SLC25A44    |   | 1 Homo sapiens FLJ90431; KIA    | 5.74E-06   | 7.64E-05   | 1.52903718 |
| ASMTL       | XM_942506.1 ASMTL       |   | PREDICTED: Homo sapiens a       | 1.04E-06   | 2.39E-05   | 1.52803361 |
| IDH2        | NM_002168.2 IDH2        |   | 15 Homo sapiens ICD-M; IDHM;    | 6.46E-06   | 8.33E-05   | 1.52302786 |
| TMEM189     | NM_199129.1 TMEM189     |   | 20 Homo sapiens UBE2V1; Kua     | 5.70E-07   | 1.60E-05   | 1.52143778 |
| KCTD20      | NM_173562.3 KCTD20      |   | 6 Homo sapiens MGC14254; d:     | 0.00051738 | 0.0019785  | 1.51951074 |
| LOC10012966 | XM_00171360 LOC10012966 |   | PREDICTED: Homo sapiens h       | 2.79E-09   | 6.73E-07   | 1.51865307 |
| TMEM205     | NM_198536.1 TMEM205     |   | 19 Homo sapiens UNQ501; MGC     | 5.34E-09   | 9.52E-07   | 1.51858614 |
| PCTP        | NM_021213.1 PCTP        |   | 17 Homo sapiens STARD2          | 0.00015093 | 0.00077741 | 1.51774387 |
| LOC132241   | XM_379215.2 LOC132241   |   | PREDICTED: Homo sapiens h       | 0.00585521 | 0.01310428 | 1.51736004 |
| EIF4EBP2    | NM_004096.3 EIF4EBP2    |   | 10 Homo sapiens 4EBP2           | 1.60E-06   | 3.22E-05   | 1.5168034  |
| RNU1-5      | NR_004400.1 RNU1-5      |   | 1 Homo sapiens HSD4             | 6.42E-08   | 4.13E-06   | 1.514659   |
| KLHL29      | XM_00171745 KLHL29      |   | 2 PREDICTED: Homo sapiens k     | 4.67E-06   | 6.60E-05   | 1.51434819 |
| KIAA1602    | XM_035497.1 KIAA1602    |   | 12 Homo sapiens FP1193          | 0.00459702 | 0.01083975 | 1.51384485 |
| TSPAN31     | NM_005981.3 TSPAN31     |   | 12 Homo sapiens SAS             | 0.00396812 | 0.00963483 | 1.51369773 |

## 2.0 ACL-Independent Upreg

|           |                       |   |                               |            |            |            |
|-----------|-----------------------|---|-------------------------------|------------|------------|------------|
| CBWD3     | NM_201453.2 CBWD3     |   | 9 Homo sapiens bA561O23.1     | 2.07E-05   | 0.00019024 | 1.51363966 |
| MT1X      | NM_005952.2 MT1X      |   | 16 Homo sapiens MT1; MT-1I    | 2.10E-09   | 5.57E-07   | 1.5136238  |
| LOC649679 | XM_945046.1 LOC649679 |   | PREDICTED: Homo sapiens s     | 0.0002254  | 0.00105135 | 1.51060593 |
| VPS13A    | NM_033305.2 VPS13A    |   | 9 Homo sapiens KIAA0986; CH   | 0.00043912 | 0.00174746 | 1.51024376 |
| WFS1      | NM_006005.2 WFS1      |   | 4 Homo sapiens DFNA14; DIDM   | 7.91E-08   | 4.60E-06   | 1.50836219 |
| ACSL1     | NM_001995.2 ACSL1     |   | 4 Homo sapiens FACL2; LACS;   | 0.00085935 | 0.0029213  | 1.50783273 |
| SLC22A18  | NM_002555.3 SLC22A18  |   | 11 Homo sapiens IMPT1; ORCTL  | 0.0007913  | 0.00273621 | 1.50683898 |
| TRIM21    | NM_003141.3 TRIM21    |   | 11 Homo sapiens RNF81; RO52;  | 0.00548165 | 0.01242172 | 1.50565422 |
|           | Hs.491292 HS.491292   |   | 8 Homo sapiens cDNA FLJ3655   | 0.00569813 | 0.01281076 | 1.5054764  |
| STX12     | NM_177424.1 STX12     |   | 1 Homo sapiens STX14; MGC5    | 0.00016171 | 0.00081741 | 1.5045055  |
| TTPAL     | NM_024331.2 TTPAL     |   | 20 Homo sapiens DKFZp686E08   | 8.48E-05   | 0.00051558 | 1.50430193 |
| C9orf40   | NM_017998.1 C9orf40   |   | 9 Homo sapiens FLJ10110; FLJ  | 0.00056223 | 0.00211796 | 1.50398959 |
|           | Hs.371609 HS.371609   |   | 3 Homo sapiens cDNA clone IM  | 7.48E-06   | 9.14E-05   | 1.50313003 |
| RABL4     | NM_006860.2 RABL4     |   | 22 Homo sapiens RAYL          | 0.00013392 | 0.00070891 | 1.50214202 |
| COL4A5    | NM_033381.1 COL4A5    | X | Homo sapiens MGC42377; A      | 0.00046714 | 0.00183018 | 1.49889831 |
| FBXL2     | NM_012157.2 FBXL2     |   | 3 Homo sapiens FBL2; FBL3; D  | 0.00018543 | 0.00090738 | 1.4988903  |
| TNFAIP1   | NM_021137.3 TNFAIP1   |   | 17 Homo sapiens EDP1; B61; B  | 6.80E-06   | 8.68E-05   | 1.49754693 |
| GAD1      | NM_013445.3 GAD1      |   | 2 Homo sapiens SCP; FLJ4588   | 0.01148292 | 0.0224212  | 1.49451141 |
| HLA-B     | NM_005514.5 HLA-B     |   | 6 Homo sapiens AS; HLA-B-55   | 3.50E-08   | 2.72E-06   | 1.49229098 |
| C15orf21  | NM_00100526 C15orf21  |   | 15 Homo sapiens D-PCa-2; FLJ3 | 0.00062062 | 0.00228718 | 1.49063031 |
| ZDHHC9    | NM_00100822 ZDHHC9    | X | Homo sapiens ZNF379; CGI-1    | 0.0001074  | 0.00060826 | 1.48603891 |
| UBL7      | NM_032907.3 UBL7      |   | 15 Homo sapiens TCBA1; MGC1   | 0.00013854 | 0.00072669 | 1.48474918 |
| DENND5B   | NM_144973.2 DENND5B   |   | 12 Homo sapiens FLJ41648; DK  | 5.88E-05   | 0.00039909 | 1.48268346 |
| PACSIN1   | NM_020804.2 PACSIN1   |   | 6 Homo sapiens KIAA1379; SD   | 0.01114219 | 0.021858   | 1.48118112 |
| STRBP     | NM_018387.2 STRBP     |   | 9 Homo sapiens DKFZp434N21    | 0.00106897 | 0.00347105 | 1.47948953 |
| HERC1     | NM_003922.2 HERC1     |   | 15 Homo sapiens p619; p532    | 7.99E-05   | 0.00049423 | 1.47780946 |
| AZI1      | NM_014984.1 AZI1      |   | 17 Homo sapiens AZ1; Cep131   | 9.32E-06   | 0.00010579 | 1.47684398 |
| PMVK      | NM_006556.2 PMVK      |   | 1 Homo sapiens PMKASE; HUM    | 0.00038882 | 0.00158681 | 1.47586104 |
| AHNAK2    | NM_138420.2 AHNAK2    |   | 14 Homo sapiens KIAA2019; C1  | 0.0001366  | 0.00071824 | 1.47450542 |
|           | Hs.296031 HS.296031   | X | Homo sapiens cDNA clone IM    | 5.02E-06   | 6.91E-05   | 1.4724076  |
| TMEM120A  | NM_031925.1 TMEM120A  |   | 7 Homo sapiens TMPIT          | 4.20E-05   | 0.00031835 | 1.47069155 |
| SNORA7B   | XM_930024.1 SNORA7B   |   | 3 Homo sapiens ACA7B          | 0.02494547 | 0.04100232 | 1.4704247  |
| MST1      | NM_020998.2 MST1      |   | 3 Homo sapiens HGFL; NF15S2   | 2.32E-05   | 0.00020619 | 1.47025906 |
| SLC16A10  | NM_018593.3 SLC16A10  |   | 6 Homo sapiens TAT1; PRO081   | 0.00043339 | 0.0017329  | 1.46969154 |
| EXT2      | NM_000401.2 EXT2      |   | 11 Homo sapiens SOTV          | 2.57E-05   | 0.00022367 | 1.46955682 |
| ENC1      | NM_003633.1 ENC1      |   | 5 Homo sapiens PIG10; NRPB;   | 2.65E-05   | 0.00022899 | 1.46829565 |
| GRAMD4    | NM_015124.2 GRAMD4    |   | 22 Homo sapiens KIAA0767; MC  | 0.00706367 | 0.01521665 | 1.46785553 |
| MYBL1     | NM_00108041 MYBL1     |   | 8 Homo sapiens MGC120061; I   | 0.01000866 | 0.02011356 | 1.46704921 |
| GJB5      | NM_005268.2 GJB5      |   | 1 Homo sapiens CX31.1         | 0.01002096 | 0.02012712 | 1.46612121 |
| HSDL2     | NM_032303.2 HSDL2     |   | 9 Homo sapiens MGC10940; C    | 7.94E-06   | 9.51E-05   | 1.46557455 |
| PIP5K1C   | NM_012398.1 PIP5K1C   |   | 19 Homo sapiens PIP5Kgamma;   | 8.99E-05   | 0.00053848 | 1.46510786 |
| AP1S2     | NM_003916.3 AP1S2     | X | Homo sapiens MGC:1902; SI     | 6.92E-06   | 8.74E-05   | 1.46469261 |
| BCL6      | NM_001706.2 BCL6      |   | 3 Homo sapiens ZBTB27; ZNF5   | 0.00024219 | 0.00110409 | 1.46216995 |
| BAIAP2    | NM_017450.1 BAIAP2    |   | 17 Homo sapiens IRSP53; BAP2  | 1.72E-05   | 0.00016539 | 1.46174474 |
| CLYBL     | NM_138280.3 CLYBL     |   | 13 Homo sapiens BA134O15.1;   | 6.72E-06   | 8.61E-05   | 1.46166563 |
| APBB3     | NM_006051.2 APBB3     |   | 5 Homo sapiens MGC87674; SI   | 2.48E-07   | 9.21E-06   | 1.46084497 |
| PLEKHB2   | NM_017958.1 PLEKHB2   |   | 2 Homo sapiens EVT2; FLJ207   | 0.00031224 | 0.00134232 | 1.46031236 |
| RAPGEF2   | NM_014247.2 RAPGEF2   |   | 4 Homo sapiens RA-GEF; PDZC   | 4.35E-05   | 0.00032583 | 1.45850576 |
| SMYD3     | NM_022743.1 SMYD3     |   | 1 Homo sapiens BA74P14.1; ZI  | 4.88E-07   | 1.46E-05   | 1.45812388 |
| CENPT     | NM_025082.3 CENPT     |   | 16 Homo sapiens FLJ13111; CEI | 0.00024825 | 0.0011232  | 1.45587515 |
| PCOLCE2   | NM_013363.2 PCOLCE2   |   | 3 Homo sapiens PCPE2          | 0.00188944 | 0.00540523 | 1.45574381 |
| LOC644988 | XR_017586.2 LOC644988 |   | 17 PREDICTED: Homo sapiens n  | 2.04E-05   | 0.00018845 | 1.45430299 |
| ATP6V0D1  | NM_004691.3 ATP6V0D1  |   | 16 Homo sapiens VPATPD; ATP6  | 2.22E-05   | 0.00020064 | 1.4515846  |
| TMEM188   | NM_153261.3 TMEM188   |   | 16 Homo sapiens C16orf69; FLJ | 8.92E-05   | 0.00053544 | 1.44954678 |
| NPC1      | NM_000271.1 NPC1      |   | 18 Homo sapiens NPC           | 3.14E-07   | 1.06E-05   | 1.4485801  |
| MT1A      | NM_005946.2 MT1A      |   | 16 Homo sapiens MTC; MT1; MC  | 2.29E-05   | 0.00020479 | 1.44830574 |
| MAMLD1    | NM_005491.1 MAMLD1    | X | Homo sapiens CXorf6; F18; C   | 0.00214029 | 0.0059399  | 1.44808742 |
| UQCR      | NM_006830.2 UQCR      |   | 19 Homo sapiens 0710008D09R   | 0.017215   | 0.03062573 | 1.44761014 |
| SNX22     | NM_024798.2 SNX22     |   | 15 Homo sapiens FLJ13952      | 0.00540098 | 0.01226706 | 1.44694864 |
| HSPA12A   | XM_945467.1 HSPA12A   |   | PREDICTED: Homo sapiens h     | 0.00058151 | 0.00218002 | 1.44655068 |
| KIAA0672  | NM_014859.3 KIAA0672  |   | 17 Homo sapiens KIAA0672 gen  | 0.00035639 | 0.00148855 | 1.44642355 |
| C7orf70   | XM_935791.1 C7orf70   |   | 7 Homo sapiens chromosome 7   | 1.28E-05   | 0.00013175 | 1.44594068 |
| CDC14B    | NM_033332.1 CDC14B    |   | 9 Homo sapiens CDC14B3; hCI   | 0.0002214  | 0.00103803 | 1.44432315 |
| TSPAN9    | NM_006675.3 TSPAN9    |   | 12 Homo sapiens PP1057; NET-! | 2.41E-08   | 2.20E-06   | 1.44364082 |
| LIPA      | NM_000235.2 LIPA      |   | 10 Homo sapiens CESD; LAL     | 2.38E-08   | 2.21E-06   | 1.44297485 |
| TOR1B     | NM_014506.1 TOR1B     |   | 9 Homo sapiens DQ1; MGC438    | 0.00393005 | 0.00956804 | 1.44131155 |
| MGC4677   | XM_939115.1 MGC4677   |   | 2 Homo sapiens MGC17532; M    | 1.63E-05   | 0.00015814 | 1.44112679 |
| CGN       | NM_020770.1 CGN       |   | 1 Homo sapiens FLJ39281; DK   | 2.36E-06   | 4.16E-05   | 1.44103868 |
| PUS3      | NM_031307.2 PUS3      |   | 11 Homo sapiens FKSG32; FLJ2  | 0.00012026 | 0.0006584  | 1.44012623 |
| BCOR      | NM_017745.4 BCOR      | X | Homo sapiens MGC131961; I     | 9.98E-05   | 0.00057767 | 1.43794543 |

## 2.0 ACL-Independent Upreg

|             |             |             |    |                              |            |            |            |
|-------------|-------------|-------------|----|------------------------------|------------|------------|------------|
| CYTH3       | NM_004227.3 | CYTH3       | 7  | Homo sapiens GRP1; ARNO3     | 0.00911723 | 0.01864623 | 1.43763034 |
| EPAS1       | NM_001430.3 | EPAS1       | 2  | Homo sapiens HLF; ECTY4; H   | 4.41E-05   | 0.00032906 | 1.4372422  |
| CHKA        | XM_945706.1 | CHKA        |    | PREDICTED: Homo sapiens c    | 1.03E-05   | 0.00011385 | 1.43698248 |
| C18orf54    | NM_173529.3 | C18ORF54    | 18 | Homo sapiens MGC33382        | 0.00078006 | 0.00270678 | 1.43388756 |
| SPRED2      | NM_181784.1 | SPRED2      | 2  | Homo sapiens MGC163164; I    | 3.07E-05   | 0.00025358 | 1.43284032 |
| NME7        | NM_013330.3 | NME7        | 1  | Homo sapiens nm23-H7; FLJ    | 8.14E-06   | 9.65E-05   | 1.4322658  |
| U2AF1L2     | NM_005089.1 | U2AF1L2     |    | Homo sapiens U2AF1RS2; U2    | 0.00223459 | 0.0061296  | 1.43215271 |
| SELM        | NM_080430.2 | SELM        | 22 | Homo sapiens MGC40146; SI    | 2.23E-05   | 0.00020127 | 1.43142233 |
| HN1         | NM_016185.2 | HN1         | 17 | Homo sapiens HN1A; ARM2      | 1.41E-08   | 1.79E-06   | 1.4304922  |
| CCDC128     | NM_152994.2 | CCDC128     | 2  | Homo sapiens MGC111781; I    | 0.00011727 | 0.00064663 | 1.43003479 |
|             |             | Hs.545615   | 9  | od80c09.s1 NCI_CGAP_Ov2 I    | 0.00222795 | 0.00611604 | 1.42766451 |
| SUB1        | NM_006713.2 | SUB1        | 5  | Homo sapiens P15; p14; MG    | 1.45E-05   | 0.00014531 | 1.4271442  |
|             |             | XR_038676.1 |    | PREDICTED: Homo sapiens n    | 0.00409582 | 0.009859   | 1.42679055 |
| LOC10013017 | XR_038676.1 | LOC10013017 |    |                              |            |            |            |
| ST6GALNAC6  | NM_013443.3 | ST6GALNAC6  | 9  | Homo sapiens RP11-203J24.    | 0.02533637 | 0.04148798 | 1.42605807 |
| PRAF2       | NM_007213.1 | PRAF2       |    | Homo sapiens JM4             | 5.15E-05   | 0.00036434 | 1.42535862 |
| C14orf78    | XM_941311.1 | C14ORF78    |    | PREDICTED: Homo sapiens c    | 0.00049757 | 0.00192371 | 1.42519551 |
| SCPEP1      | NM_021626.1 | SCPEP1      | 17 | Homo sapiens RISC; HSCP1     | 8.77E-08   | 4.94E-06   | 1.42504629 |
| CGRRF1      | NM_006568.2 | CGRRF1      | 14 | Homo sapiens RNF197; CGR     | 0.00018757 | 0.00091537 | 1.42495827 |
| ID2         | NM_002166.4 | ID2         | 2  | Homo sapiens GIG8; MGC26     | 2.49E-08   | 2.20E-06   | 1.42478467 |
| ZNF558      | NM_144693.1 | ZNF558      | 19 | Homo sapiens FLJ30932        | 0.0042603  | 0.01017604 | 1.42478146 |
| FAM103A1    | NM_031452.2 | FAM103A1    | 15 | Homo sapiens HsT19360; C1    | 4.75E-06   | 6.67E-05   | 1.42454461 |
| C1orf97     | NM_032705.2 | C1ORF97     | 1  | Homo sapiens MGC14801; FI    | 4.67E-06   | 6.61E-05   | 1.42209262 |
| SEMA4F      | NM_004263.2 | SEMA4F      | 2  | Homo sapiens PRO2353; M-S    | 6.32E-05   | 0.00041924 | 1.42166785 |
| SMA4        | NM_021652.2 | SMA4        |    | Homo sapiens MGC22265        | 0.00055009 | 0.002078   | 1.42004499 |
| ADAT1       | NM_012091.2 | ADAT1       | 16 | Homo sapiens HADAT1          | 0.02155685 | 0.03657764 | 1.41986788 |
| IPO13       | NM_014652.2 | IPO13       | 1  | Homo sapiens RANBP13; KIA    | 0.01375003 | 0.02573809 | 1.41977643 |
| CYB5A       | NM_148923.2 | CYB5A       | 18 | Homo sapiens MCB5; CYB5      | 3.91E-07   | 1.25E-05   | 1.41943304 |
| DFNA5       | NM_004403.1 | DFNA5       | 7  | Homo sapiens ICERE-1         | 2.32E-05   | 0.00020632 | 1.41884443 |
| C15orf57    | NM_052849.2 | C15ORF57    | 15 | Homo sapiens MGC20481; FI    | 1.04E-05   | 0.00011427 | 1.41825365 |
|             |             | XM_942503.1 |    | PREDICTED: Homo sapiens fi   | 0.00013999 | 0.00073251 | 1.41778296 |
| FAM69B      | XM_942503.1 | FAM69B      |    |                              |            |            |            |
| MAST3       | XM_038150.5 | MAST3       | 19 | Homo sapiens KIAA0561        | 0.00013493 | 0.00071291 | 1.41713132 |
| DDEF2       | NM_003887.1 | DDEF2       | 2  | Homo sapiens PAG3; Pap-alp   | 0.00010764 | 0.00060836 | 1.4166161  |
| KIF3B       | NM_004798.2 | KIF3B       | 20 | Homo sapiens HFO048; KIAA    | 8.27E-06   | 9.78E-05   | 1.41654649 |
| WDR26       | NM_025160.4 | WDR26       | 1  | Homo sapiens FLJ21016; MIF   | 0.00519793 | 0.01192801 | 1.4155501  |
| PIH1D1      | NM_017916.1 | PIH1D1      | 19 | Homo sapiens NOP17; FLJ20    | 5.80E-05   | 0.00039544 | 1.4141501  |
| LOC399965   | XR_036921.1 | LOC399965   |    | PREDICTED: Homo sapiens n    | 2.71E-05   | 0.00023253 | 1.41371431 |
| PRAME       | NM_206956.1 | PRAME       | 22 | Homo sapiens MAPE; OIP4      | 0.00374907 | 0.00923921 | 1.41365303 |
| UBE2L6      | NM_198183.1 | UBE2L6      | 11 | Homo sapiens UBCH8; RIG-E    | 4.88E-05   | 0.00035289 | 1.41355241 |
| CPE         | NM_001873.1 | CPE         | 4  | Homo sapiens carboxypeptid   | 4.55E-05   | 0.00033649 | 1.41280366 |
| CCDC53      | NM_016053.1 | CCDC53      | 12 | Homo sapiens CGI-116         | 0.00016289 | 0.00082261 | 1.41214291 |
| LMBRD1      | NM_018368.2 | LMBRD1      | 6  | Homo sapiens HA810I22.1; F   | 1.65E-06   | 3.30E-05   | 1.41153551 |
| CYB561D1    | NM_182580.2 | CYB561D1    | 1  | Homo sapiens cytochrome b-   | 8.33E-05   | 0.00050853 | 1.40951643 |
| CDK2AP2     | NM_005851.3 | CDK2AP2     | 11 | Homo sapiens p14; FLJ1063f   | 0.00087926 | 0.00296949 | 1.40861021 |
| MAPK14      | NM_139013.1 | MAPK14      | 6  | Homo sapiens p38; PRKM15;    | 0.01330347 | 0.02507929 | 1.40770537 |
| CPT2        | NM_000098.1 | CPT2        | 1  | Homo sapiens CPTASE; CPT1    | 7.58E-05   | 0.00047703 | 1.40770135 |
| HLA-F       | NM_018950.1 | HLA-F       | 6  | Homo sapiens HLA-5.4; HLAf   | 4.75E-06   | 6.68E-05   | 1.40753953 |
| IFI30       | NM_006332.3 | IFI30       | 19 | Homo sapiens MGC32056; IF    | 5.98E-05   | 0.00040271 | 1.40724906 |
| KDEL3       | NM_016657.1 | KDEL3       | 22 | Homo sapiens ERD2L3          | 3.19E-06   | 5.09E-05   | 1.405255   |
| TMEM132A    | NM_178031.2 | TMEM132A    | 11 | Homo sapiens DKFZp547E21     | 7.21E-06   | 8.94E-05   | 1.40463377 |
| HIF1AN      | NM_017902.1 | HIF1AN      | 10 | Homo sapiens DKFZp762F18     | 6.80E-05   | 0.0004433  | 1.40374938 |
| PQLC3       | NM_152391.2 | PQLC3       | 2  | Homo sapiens C2orf22; MGC    | 6.41E-07   | 1.74E-05   | 1.40353817 |
| DDB2        | NM_000107.1 | DDB2        | 11 | Homo sapiens FLJ34321        | 0.00056122 | 0.00211563 | 1.40102982 |
| HADHB       | NM_000183.2 | HADHB       | 2  | Homo sapiens MGC87480; M     | 0.00010377 | 0.00059416 | 1.40030236 |
| PCNX        | NM_014982.1 | PCNX        | 14 | Homo sapiens KIAA0805; PC    | 0.00076243 | 0.00266177 | 1.39939528 |
| MTE         | NM_175621.2 | MTE         |    | Homo sapiens MT1I            | 1.51E-09   | 4.31E-07   | 1.39885013 |
| CSRP1       | NM_004078.1 | CSRP1       | 1  | Homo sapiens CRP; CRP1; DI   | 2.97E-06   | 4.84E-05   | 1.39777075 |
| ASAP3       | NM_017707.2 | ASAP3       | 1  | Homo sapiens CENTB6; ACAf    | 8.99E-06   | 0.00010331 | 1.3972766  |
| C3orf39     | NM_032806.4 | C3ORF39     | 3  | Homo sapiens AGO61; FLJ14    | 0.0003533  | 0.00147962 | 1.3972335  |
| ANKDD1A     | NM_182703.2 | ANKDD1A     | 15 | Homo sapiens MGC120306; I    | 3.32E-05   | 0.00026692 | 1.39686085 |
| GRK5        | NM_005308.2 | GRK5        | 10 | Homo sapiens GPRK5           | 5.35E-05   | 0.000375   | 1.39675641 |
| FIG4        | NM_014845.4 | FIG4        | 6  | Homo sapiens SAC3; RP1-24    | 0.00054946 | 0.00207633 | 1.39667337 |
| ESPN        | NM_031475.1 | ESPN        | 1  | Homo sapiens DKFZP434A19     | 8.12E-05   | 0.00049884 | 1.39351976 |
| C6orf129    | NM_138493.1 | C6ORF129    | 6  | Homo sapiens HSPC265; MG     | 1.31E-05   | 0.00013428 | 1.3929141  |
| SEC22A      | NM_012430.2 | SEC22A      | 3  | Homo sapiens SEC22L2         | 0.00025755 | 0.0011528  | 1.39289077 |
| DYNLL2      | NM_080677.1 | DYNLL2      | 17 | Homo sapiens MGC17810; D     | 9.86E-07   | 2.28E-05   | 1.39269858 |
| EVI5L       | NM_145245.2 | EVI5L       | 19 | Homo sapiens ecotropic viral | 1.54E-05   | 0.00015187 | 1.39114543 |
| PXDN        | NM_012293.1 | PXDN        | 2  | Homo sapiens D2S448E; D2S    | 0.00091945 | 0.00308224 | 1.39094119 |
| C10orf47    | NM_153256.2 | C10ORF47    | 10 | Homo sapiens MGC35403        | 0.0047974  | 0.01121009 | 1.39091513 |
| GPAA1       | NM_003801.2 | GPAA1       | 8  | Homo sapiens hGAA1; GAA1     | 3.75E-06   | 5.72E-05   | 1.39038171 |
| CTSL2       | NM_001333.2 | CTSL2       | 9  | Homo sapiens CTSV; CATL2;    | 4.51E-08   | 3.24E-06   | 1.3900463  |

## 2.0 ACL-Independent Upreg

|           |                       |                                 |            |            |            |
|-----------|-----------------------|---------------------------------|------------|------------|------------|
| DCUN1D3   | NM_173475.1 DCUN1D3   | 16 Homo sapiens MGC48972; FI    | 1.12E-05   | 0.00012016 | 1.38977823 |
| PTEN      | NM_000314.3 PTEN      | 10 Homo sapiens MMAC1; MHA      | 7.40E-06   | 9.11E-05   | 1.3894274  |
| CYP26B1   | NM_019885.2 CYP26B1   | 2 Homo sapiens CYP26A2; MG      | 3.54E-06   | 5.48E-05   | 1.38935344 |
| RRM2B     | NM_015713.3 RRM2B     | 8 Homo sapiens DKFZp686M05      | 0.00018436 | 0.00090335 | 1.38882493 |
| PRKAB2    | NM_005399.3 PRKAB2    | 1 Homo sapiens MGC61468         | 0.02046353 | 0.03508956 | 1.38579381 |
| PEX16     | NM_004813.1 PEX16     | 11 Homo sapiens peroxisomal bi  | 0.00108378 | 0.00351075 | 1.38571088 |
| FBXO2     | NM_183412.2 FBXO2     | 1 Homo sapiens Fbs1; FBG1; F    | 5.45E-06   | 7.37E-05   | 1.38536723 |
| DDIT4L    | NM_145244.2 DDIT4L    | 4 Homo sapiens Rtp801L; RED     | 1.54E-05   | 0.00015202 | 1.38461199 |
| TMEM184B  | NM_012264.3 TMEM184B  | 22 Homo sapiens DKFZp686N11     | 8.57E-05   | 0.00052017 | 1.38395944 |
| LOC113386 | NM_138781.2 LOC113386 | 19 Homo sapiens FLJ44718; FLJ   | 0.00269285 | 0.00712067 | 1.383894   |
| CXADR     | NM_001338.3 CXADR     | 21 Homo sapiens CAR; HCAR       | 8.43E-06   | 9.90E-05   | 1.38382328 |
| ISCA2     | NM_194279.1 ISCA2     | 14 Homo sapiens HBLD1; ISA2;    | 0.0051126  | 0.01177199 | 1.38371341 |
| EPHA2     | NM_004431.2 EPHA2     | 1 Homo sapiens ECK              | 0.00020478 | 0.00097828 | 1.38327349 |
| HLA-G     | NM_002127.3 HLA-G     | 6 Homo sapiens MHC-G            | 0.01377624 | 0.02577383 | 1.38231549 |
| SP4       | NM_003112.3 SP4       | 7 Homo sapiens MGC130009; S     | 0.00303764 | 0.0078156  | 1.38212186 |
| SLC2A8    | NM_014524.2 SLC2A8    | 9 Homo sapiens FLUTX1; GLU1     | 3.04E-06   | 4.93E-05   | 1.38010861 |
| PECR      | NM_018441.2 PECR      | 2 Homo sapiens HSA250303; T     | 0.02753467 | 0.04419536 | 1.37987782 |
| GRB2      | NM_002086.3 GRB2      | 17 Homo sapiens MST084; ASH;    | 0.00041721 | 0.00168248 | 1.37938487 |
| TYSND1    | NM_173555.1 TYSND1    | 10 Homo sapiens FLJ40378; MG    | 0.00354041 | 0.00882101 | 1.37932504 |
| C13orf15  | NM_014059.1 C13ORF15  | 13 Homo sapiens RGC-32; KIAA    | 9.14E-05   | 0.0005429  | 1.37886225 |
| PDLIM3    | NM_014476.1 PDLIM3    | 4 Homo sapiens DKFZp686L03      | 0.00166067 | 0.00490307 | 1.37785897 |
| SKP1      | NM_006930.3 SKP1      | 5 Homo sapiens TCEB1L; MGC:     | 0.00045649 | 0.00179688 | 1.37743091 |
|           | Hs.294603 HS.294603   | 14 Homo sapiens cDNA FLJ1287    | 1.12E-06   | 2.48E-05   | 1.37734966 |
| NPTN      | NM_012428.1 NPTN      | 15 Homo sapiens SDFR1; GP55;    | 1.72E-08   | 1.93E-06   | 1.37669141 |
| DGCR2     | NM_005137.1 DGCR2     | 22 Homo sapiens SEZ-12; IDD;    | 3.70E-05   | 0.00028971 | 1.37557595 |
| SYTL4     | NM_080737.1 SYTL4     | X Homo sapiens DKFZp451P01      | 0.01859119 | 0.03249945 | 1.37553847 |
| TBCE      | NM_003193.3 TBCE      | 1 Homo sapiens KCS; KCS1; p;    | 2.25E-06   | 4.06E-05   | 1.37546735 |
| ACPL2     | NM_152282.2 ACPL2     | 3 Homo sapiens FLJ23751         | 0.00016824 | 0.00084144 | 1.37468834 |
| KRT8P9    | XR_017231.2 KRT8P9    | 15 PREDICTED: Homo sapiens n    | 3.75E-05   | 0.0002927  | 1.37428789 |
| YIF1B     | NM_00103173 YIF1B     | 19 Homo sapiens FinGER8         | 3.58E-06   | 5.53E-05   | 1.3740809  |
| ISCA1     | NM_030940.3 ISCA1     | 9 Homo sapiens hIsaC; RP11-5    | 0.00024296 | 0.00110667 | 1.37232825 |
| LOC220686 | NM_199283.4 LOC220686 | 22 Homo sapiens hypothetical p  | 0.00572092 | 0.01285138 | 1.37144305 |
| MICB      | NM_005931.2 MICB      | 6 Homo sapiens PERB11.2         | 6.70E-05   | 0.00043879 | 1.37105831 |
| PIGS      | NM_033198.2 PIGS      | 17 Homo sapiens FLJ45226; DK    | 0.01024288 | 0.0204594  | 1.37022086 |
| RNF216L   | NR_023385.1 RNF216L   | 7 Homo sapiens ring finger pro  | 0.01992943 | 0.03437984 | 1.37017085 |
| YIPF1     | NM_018982.3 YIPF1     | 1 Homo sapiens FinGER1; DJ1f    | 7.13E-06   | 8.88E-05   | 1.36965491 |
| SNAPIN    | NM_012437.3 SNAPIN    | 1 Homo sapiens SNAAP; SNAF      | 0.00053204 | 0.00202527 | 1.36942167 |
| C6orf170  | NM_152730.4 C6ORF170  | 6 Homo sapiens bA301B7.2; FI    | 0.00180034 | 0.00520928 | 1.36940084 |
| PDE6D     | NM_002601.2 PDE6D     | 2 Homo sapiens PDED             | 2.66E-06   | 4.49E-05   | 1.36785023 |
| SYNJ2BP   | NM_018373.1 SYNJ2BP   | 14 Homo sapiens Arip2; OMP25;   | 1.75E-06   | 3.41E-05   | 1.36756891 |
| FGFR1OP2  | NM_015633.1 FGFR1OP2  | 12 Homo sapiens DKFZp564O18     | 1.72E-05   | 0.00016529 | 1.36636692 |
| CALU      | NM_001219.2 CALU      | 7 Homo sapiens FLJ90608         | 2.01E-06   | 3.73E-05   | 1.36438658 |
| EFNA4     | NM_005227.2 EFNA4     | 1 Homo sapiens EFL4; LERK4;     | 0.00867809 | 0.01793031 | 1.36352324 |
| ABCB6     | NM_005689.1 ABCB6     | 2 Homo sapiens ABC; EST455s     | 0.0022002  | 0.00605668 | 1.3626124  |
| LOC729086 | XM_00112928 LOC729086 | 1 PREDICTED: Homo sapiens s     | 1.85E-05   | 0.00017489 | 1.36072184 |
| SAR1A     | NM_020150.3 SAR1A     | 10 Homo sapiens masra2; SARA    | 3.63E-05   | 0.00028608 | 1.36030579 |
| PSCD1     | NM_017456.1 PSCD1     | 17 Homo sapiens D17S811E; B2    | 3.17E-06   | 5.06E-05   | 1.35810264 |
| HEYL      | NM_014571.2 HEYL      | 1 Homo sapiens MGC12623; H      | 9.03E-05   | 0.00053997 | 1.35750689 |
| GTF2B     | NM_001514.3 GTF2B     | 1 Homo sapiens TFIIB; TF2B      | 3.01E-06   | 4.88E-05   | 1.3573961  |
| GPS2      | NM_004489.4 GPS2      | 17 Homo sapiens MGC104294; I    | 4.36E-05   | 0.00032686 | 1.35698947 |
| CD164     | NM_006016.3 CD164     | 6 Homo sapiens endolyn; MGC     | 0.00524487 | 0.01200279 | 1.3568333  |
| ELF1      | NM_172373.2 ELF1      | 13 Homo sapiens E74-like factor | 1.30E-05   | 0.00013368 | 1.35656568 |
| BCAS4     | NM_017843.3 BCAS4     | 20 Homo sapiens FLJ20495        | 0.00015379 | 0.00078837 | 1.3554668  |
| FUCA1     | NM_000147.2 FUCA1     | 1 Homo sapiens fucosidase, al   | 8.46E-07   | 2.05E-05   | 1.35532706 |
| CRYZL1    | NM_145858.1 CRYZL1    | 21 Homo sapiens QOH-1; 4P11     | 0.00623671 | 0.01378494 | 1.3551195  |
| FBXO33    | NM_203301.1 FBXO33    | 14 Homo sapiens c14_5247; Fb;   | 3.49E-06   | 5.43E-05   | 1.35496573 |
| JUNB      | NM_002229.2 JUNB      | 19 Homo sapiens jun B proto-or  | 0.00123512 | 0.00388406 | 1.35487159 |
| TAGLN2    | NM_003564.1 TAGLN2    | 1 Homo sapiens KIAA0120; HA     | 2.55E-06   | 4.36E-05   | 1.3547915  |
| ZCCHC14   | NM_015144.1 ZCCHC14   | 16 Homo sapiens MGC126527; I    | 4.31E-06   | 6.29E-05   | 1.35463666 |
| DNM2      | NM_004945.2 DNM2      | 19 Homo sapiens CMTDI1; CMTI    | 0.00362715 | 0.00899175 | 1.35419327 |
| GPR177    | NM_024911.4 GPR177    | 1 Homo sapiens FLJ23091; C1c    | 1.09E-05   | 0.00011801 | 1.35381232 |
| STIM1     | NM_003156.2 STIM1     | 11 Homo sapiens GOK; D11S48     | 0.02006556 | 0.03453793 | 1.35378359 |
| C6orf85   | NM_021945.4 C6ORF85   | 6 Homo sapiens DKFZP434F01      | 8.37E-05   | 0.00051026 | 1.35338213 |
| CRABP2    | NM_001878.2 CRABP2    | 1 Homo sapiens CRABP-II; RBF    | 1.77E-08   | 1.92E-06   | 1.34983991 |
| TMEM208   | NM_014187.3 TMEM208   | 16 Homo sapiens HSPC171         | 0.00080224 | 0.00276786 | 1.34940169 |
| GLIPR2    | NM_022343.2 GLIPR2    | 9 Homo sapiens GLIPR2; GLAPR    | 2.72E-07   | 9.82E-06   | 1.34755133 |
| NUDT18    | NM_024815.2 NUDT18    | 8 Homo sapiens FLJ22494         | 0.00068801 | 0.00246939 | 1.34750332 |
| CYFIP2    | NM_00103733 CYFIP2    | 5 Homo sapiens PIR121           | 3.97E-05   | 0.00030448 | 1.3461994  |
| C3orf10   | NM_018462.4 C3ORF10   | 3 Homo sapiens MDS027; HSP      | 3.97E-07   | 1.27E-05   | 1.34615093 |
| FLJ31306  | XM_00171796 FLJ31306  | 14 PREDICTED: Homo sapiens h    | 0.00238482 | 0.0064634  | 1.3459372  |

## 2.0 ACL-Independent Upreg

|             |             |              |    |                             |            |            |             |
|-------------|-------------|--------------|----|-----------------------------|------------|------------|-------------|
| NUAK1       | NM_014840.2 | NUAK1        | 12 | Homo sapiens KIAA0537; AR   | 0.00042685 | 0.00171181 | 1.34574508  |
| ZCCHC17     | NM_016505.2 | ZCCHC17      | 1  | Homo sapiens pNO40; PS1D;   | 8.05E-07   | 1.98E-05   | 1.34503351  |
| LOC151162   | NR_024275.1 | LOC151162    | 2  | Homo sapiens hypothetical L | 7.80E-08   | 4.58E-06   | 1.34478057  |
| STX8        | NM_004853.1 | STX8         | 17 | Homo sapiens CARB           | 1.74E-06   | 3.40E-05   | 1.34427395  |
| LOC653344   | XM_933085.1 | LOC653344    | 15 | PREDICTED: Homo sapiens s   | 2.28E-06   | 4.08E-05   | 1.34385653  |
| LOC641298   | XR_041850.1 | LOC641298    | 16 | PREDICTED: Homo sapiens n   | 0.00084116 | 0.00287205 | 1.34346603  |
| COBL        | NM_015198.2 | COBL         | 7  | Homo sapiens DKFZp686G13    | 3.01E-06   | 4.89E-05   | 1.34334578  |
| AADAACL1    | NM_020792.3 | AADAACL1     | 3  | Homo sapiens arylacetamide  | 8.12E-05   | 0.00049847 | 1.343325    |
| TULP4       | NM_020245.3 | TULP4        | 6  | Homo sapiens RP3-442A17.1   | 0.00291671 | 0.00758706 | 1.342796    |
| MYEOV       | NM_138768.2 | MYEOV        | 11 | Homo sapiens OCIM           | 0.00014612 | 0.00075873 | 1.3425344   |
| JARID2      | NM_004973.2 | JARID2       | 6  | Homo sapiens JMJ            | 1.35E-05   | 0.00013717 | 1.34186816  |
| FLNB        | NM_001457.1 | FLNB         | 3  | Homo sapiens FLN1L; filamin | 4.96E-07   | 1.47E-05   | 1.341791    |
| MFGE8       | NM_005928.1 | MFGE8        | 15 | Homo sapiens HsT19888; BA   | 5.73E-08   | 3.82E-06   | 1.34178306  |
| KLRAQ1      | NM_00113562 | KLRAQ1       | 2  | Homo sapiens KLRAQ motif c  | 0.03036529 | 0.04752448 | 1.34047155  |
| RTN3        | NM_201428.1 | RTN3         | 11 | Homo sapiens NSPLII; NSPLI  | 5.95E-05   | 0.00040109 | 1.33869108  |
| DKFZp761P04 | XM_291277.4 | DKFZP761P04  | 8  | PREDICTED: Homo sapiens h   | 0.00118712 | 0.00377128 | 1.33864223  |
| CREG1       | NM_003851.2 | CREG1        | 1  | Homo sapiens CREG           | 1.12E-06   | 2.48E-05   | 1.33813983  |
| PDRG1       | NM_030815.2 | PDRG1        | 20 | Homo sapiens PDRG; C20orf   | 9.52E-05   | 0.00055971 | 1.33768264  |
| SLC25A4     | NM_001151.2 | SLC25A4      | 4  | Homo sapiens PEO2; ANT1; I  | 1.12E-07   | 5.70E-06   | 1.33746716  |
| GHDC        | NM_032484.3 | GHDC         | 17 | Homo sapiens D11LGP1; LGF   | 0.02226379 | 0.03751362 | 1.33669385  |
| PANX2       | NM_052839.2 | PANX2        | 22 | Homo sapiens hPANX2; MGC    | 0.01374293 | 0.02572923 | 1.33516675  |
| RANBP10     | NM_020850.1 | RANBP10      | 16 | Homo sapiens KIAA1464; FL   | 0.00308697 | 0.00790509 | 1.33514519  |
| C8orf55     | NM_016647.1 | C8ORF55      | 8  | Homo sapiens DSCD75         | 2.41E-06   | 4.19E-05   | 1.33292309  |
|             | Hs.27048    | Hs.27048     | 12 | Homo sapiens cDNA FLJ3175   | 0.00037186 | 0.00153604 | 1.33253878  |
| CTSB        | NM_001908.3 | CTSB         | 8  | Homo sapiens CPSB; APPS     | 0.00030129 | 0.00130247 | 1.332143142 |
| ANKFY1      | NM_020740.1 | ANKFY1       | 17 | Homo sapiens KIAA1255; DK   | 0.0038564  | 0.00942464 | 1.32941103  |
| NELF        | NM_015537.3 | NELF         | 9  | Homo sapiens RP11-48C7.1;   | 6.00E-06   | 7.86E-05   | 1.32922436  |
| SLC25A42    | NM_178526.1 | SLC25A42     | 19 | Homo sapiens MGC26694       | 0.00627083 | 0.01384064 | 1.32845869  |
| MTMR14      | NM_022485.2 | MTMR14       | 3  | Homo sapiens FLJ22405; C3   | 8.94E-05   | 0.00053591 | 1.32806861  |
| RAB31       | NM_006868.2 | RAB31        | 18 | Homo sapiens Rab22B         | 7.53E-07   | 1.89E-05   | 1.32771284  |
| TPST2       | NM_00100856 | TPST2        | 22 | Homo sapiens tyrosylprotein | 0.00033538 | 0.00142048 | 1.32768724  |
| ACAD11      | NM_032169.3 | ACAD11       | 3  | Homo sapiens FLJ12592; MG   | 0.00028453 | 0.00125041 | 1.32710942  |
| C9orf16     | NM_024111.2 | C9ORF16      | 9  | Homo sapiens EST00098; FL   | 0.02242956 | 0.03771693 | 1.32662478  |
| CSAG3B      | NM_00108084 | CSAG3B       |    | Homo sapiens CSAG2          | 0.01507734 | 0.02766045 | 1.32636238  |
| EIF2S1      | NM_004094.4 | EIF2S1       | 14 | Homo sapiens EIF2A; EIF-2A  | 0.00013419 | 0.00070967 | 1.32588968  |
| RERE        | NM_012102.3 | RERE         | 1  | Homo sapiens ARP; ATN1L; A  | 0.01103668 | 0.0217216  | 1.3248253   |
| NECAP2      | NM_018090.3 | NECAP2       | 1  | Homo sapiens FLJ10420; RP   | 1.13E-05   | 0.00012073 | 1.32390207  |
| IGF2R       | NM_000876.1 | IGF2R        | 6  | Homo sapiens M6P-R; CD22    | 7.76E-07   | 1.93E-05   | 1.32301541  |
| MAP3K1      | XM_042066.1 | MAP3K1       | 5  | Homo sapiens MAPKKK1; ME    | 0.00099886 | 0.00328659 | 1.32263979  |
| SGPL1       | NM_003901.2 | SGPL1        | 10 | Homo sapiens KIAA1252; SP   | 0.00538827 | 0.01224587 | 1.32251271  |
| PLOD2       | NM_182943.2 | PLOD2        | 3  | Homo sapiens LH2; TLH       | 8.76E-06   | 0.00010161 | 1.32234024  |
| NUDCD3      | NM_015332.2 | NUDCD3       | 7  | Homo sapiens KIAA1068; Nu   | 8.12E-05   | 0.00049865 | 1.32128271  |
| ZBTB48      | NM_005341.1 | ZBTB48       | 1  | Homo sapiens pp9964; HKR    | 0.0002372  | 0.0010868  | 1.32122434  |
| POR         | NM_000941.1 | POR          | 7  | Homo sapiens CPR; FLJ2646   | 7.41E-05   | 0.00046929 | 1.32042101  |
| LOC10013253 | XR_038464.1 | LOC100132535 |    | PREDICTED: Homo sapiens n   | 0.00113372 | 0.00363996 | 1.31974138  |
| ELOVL5      | NM_021814.3 | ELOVL5       | 6  | Homo sapiens HELO1; RP3-4   | 1.13E-05   | 0.00012074 | 1.31951822  |
| CSRP2       | NM_001321.1 | CSRP2        | 12 | Homo sapiens CRP2; LMO5; :  | 4.00E-06   | 5.97E-05   | 1.31929439  |
| UBN1        | NM_00107951 | UBN1         | 16 | Homo sapiens VT4; VT        | 1.44E-05   | 0.00014424 | 1.31917351  |
| PVRL2       | NM_00104272 | PVRL2        | 19 | Homo sapiens PVRR2; HVEB;   | 0.00117084 | 0.00373816 | 1.31764978  |
| LOC143666   | NM_002020.1 | LOC143666    | 11 | PREDICTED: Homo sapiens h   | 0.00217229 | 0.00599655 | 1.31753846  |
| CDCP1       | NM_022842.3 | CDCP1        | 3  | Homo sapiens SIMA135; TRA   | 0.00023317 | 0.00107557 | 1.31748417  |
| TM7SF2      | NM_003273.1 | TM7SF2       | 11 | Homo sapiens ANG1; DHCR1    | 2.81E-06   | 4.67E-05   | 1.31708637  |
| TMEM50B     | NM_006134.4 | TMEM50B      | 21 | Homo sapiens C21orf4; HCVI  | 2.39E-05   | 0.00021143 | 1.31691465  |
| HCFC1R1     | NM_00100201 | HCFC1R1      | 16 | Homo sapiens MGC99622; H    | 7.81E-07   | 1.94E-05   | 1.31653474  |
| MIDN        | NM_177401.4 | MIDN         | 19 | Homo sapiens DKFZp547M07    | 0.00011134 | 0.00062343 | 1.3162217   |
| FUK         | NM_145059.2 | FUK          | 16 | Homo sapiens 1110046B12R    | 0.00164672 | 0.00487513 | 1.31576614  |
| NOTCH3      | NM_000435.1 | NOTCH3       | 19 | Homo sapiens CASIL; CADAS   | 0.00531043 | 0.0121044  | 1.31356965  |
| FAM127A     | NM_003928.1 | FAM127A      |    | Homo sapiens CXX1; MAR8C    | 1.04E-05   | 0.00011446 | 1.31301777  |
| POFUT2      | NM_015227.3 | POFUT2       | 21 | Homo sapiens C21orf80; FUT  | 8.04E-05   | 0.00049643 | 1.31203376  |
| TBC1D20     | NM_144628.2 | TBC1D20      | 20 | Homo sapiens FLJ45119; C2   | 0.00376195 | 0.00925835 | 1.31199171  |
| PRKCZ       | NM_00103358 | PRKCZ        | 1  | Homo sapiens PKC2           | 0.01033939 | 0.02061428 | 1.31082523  |
| RNF182      | NM_152737.2 | RNF182       | 6  | Homo sapiens FLJ40772; MG   | 0.01169511 | 0.0227334  | 1.3104843   |
| CDK6        | NM_001259.5 | CDK6         | 7  | Homo sapiens PLSTIRE; MGC   | 9.48E-06   | 0.00010724 | 1.30967529  |
| DUSP6       | NM_001946.2 | DUSP6        | 12 | Homo sapiens MKP3; PYST1    | 1.41E-07   | 6.60E-06   | 1.30882969  |
| SCAND1      | NM_033630.1 | SCAND1       | 20 | Homo sapiens RAZ1; SDP1     | 9.09E-05   | 0.0005419  | 1.30839393  |
| C9orf156    | NM_016481.2 | C9ORF156     | 9  | Homo sapiens NAP1; RP11-2   | 0.01121307 | 0.0219772  | 1.30819148  |
| HFE         | NM_000410.3 | HFE          | 6  | Homo sapiens MGC103790; I   | 0.03102581 | 0.04830089 | 1.30810818  |
| NAPB        | NM_022080.1 | NAPB         | 20 | Homo sapiens SNAP-BETA; M   | 0.01706833 | 0.03043455 | 1.30736636  |
| ARFGAP1     | NM_175609.1 | ARFGAP1      | 20 | Homo sapiens ARF1GAP; HRJ   | 0.00455349 | 0.01075344 | 1.30563427  |
| ITM2C       | NM_00101251 | ITM2C        | 2  | Homo sapiens E25; ITM3; BF  | 1.50E-08   | 1.83E-06   | 1.30554689  |



## 2.0 ACL-Independent Upreg

|             |             |              |    |                              |            |            |            |
|-------------|-------------|--------------|----|------------------------------|------------|------------|------------|
| TMEM179B    | NM_199337.2 | TMEM179B     | 11 | Homo sapiens transmembran    | 2.49E-05   | 0.00021821 | 1.30496777 |
| ARL8B       | NM_018184.2 | ARL8B        | 3  | Homo sapiens FLJ10702; ARL   | 5.25E-07   | 1.52E-05   | 1.30477946 |
| ZDHHC12     | NM_032799.4 | ZDHHC12      | 9  | Homo sapiens MGC13153; M     | 0.00016147 | 0.00081697 | 1.3036848  |
| OSTF1       | NM_012383.3 | OSTF1        | 9  | Homo sapiens bA235O14.1; O   | 8.62E-06   | 0.0001004  | 1.30327186 |
| TBPL1       | NM_004865.2 | TBPL1        | 6  | Homo sapiens TRF2; STU       | 1.28E-06   | 2.73E-05   | 1.30310957 |
| ARID3A      | NM_005224.1 | ARID3A       | 19 | Homo sapiens E2FBP1; BRIG    | 0.00150758 | 0.0045639  | 1.3020249  |
| CTGLF7      | XM_00171478 | CTGLF7       | 10 | PREDICTED: Homo sapiens c    | 3.10E-07   | 1.05E-05   | 1.30172761 |
| MED19       | NM_152450.1 | MED19        | 11 | Homo sapiens LCMR1           | 0.00029345 | 0.00127516 | 1.30153083 |
| MXD4        | NM_006454.2 | MXD4         | 4  | Homo sapiens MSTP149; MAI    | 5.30E-05   | 0.00037264 | 1.29970182 |
| TMEM99      | Hs.562720   | TMEM99       | 17 | Homo sapiens MGC21518        | 9.99E-06   | 0.00011143 | 1.29958425 |
| AGRN        | NM_198576.2 | AGRN         | 1  | Homo sapiens FLJ45064        | 0.0006454  | 0.00235534 | 1.2992451  |
| LAMP2       | NM_002294.1 | LAMP2        | 3  | Homo sapiens CD107b; LAMF    | 4.61E-06   | 6.56E-05   | 1.29840511 |
| C20orf127   | NM_080757.1 | C20ORF127    | 20 | Homo sapiens dj614O4.6; M    | 8.55E-07   | 2.07E-05   | 1.2983785  |
| PREB        | NM_013388.4 | PREB         | 2  | Homo sapiens SEC12; MGC3     | 4.59E-05   | 0.00033861 | 1.29804701 |
| CDA         | NM_001785.1 | CDA          | 1  | Homo sapiens CDD             | 0.00328049 | 0.00828547 | 1.29654885 |
| NSFL1C      | NM_182483.1 | NSFL1C       | 20 | Homo sapiens LCBXD10; p47;   | 0.00017694 | 0.00087727 | 1.29615142 |
| CCND3       | NM_001760.2 | CCND3        | 6  | Homo sapiens cyclin D3 (CCN  | 1.30E-07   | 6.32E-06   | 1.29607254 |
| TMEM206     | NM_018252.2 | TMEM206      | 1  | Homo sapiens C1orf75; RP11   | 0.00041923 | 0.00168874 | 1.29560907 |
| SNAP47      | NM_053052.2 | SNAP47       | 1  | Homo sapiens DKFZp686M1C     | 0.00618917 | 0.01371053 | 1.29373514 |
| BNIP3L      | NM_004331.2 | BNIP3L       | 8  | Homo sapiens BNIP3a; NIX     | 0.00076128 | 0.00265945 | 1.29358937 |
| RNF4        | NM_002938.2 | RNF4         | 4  | Homo sapiens RES4-26; SNU    | 4.67E-05   | 0.00034307 | 1.29338152 |
| RRAS        | NM_006270.2 | RRAS         | 19 | Homo sapiens related RAS vi  | 7.00E-07   | 1.82E-05   | 1.29318591 |
| RHOB        | NM_004040.2 | RHOB         | 2  | Homo sapiens ARH6; MST08     | 1.57E-07   | 6.95E-06   | 1.29308745 |
| FERMT2      | NM_006832.1 | FERMT2       | 14 | Homo sapiens KIND2; FLJ44    | 4.83E-05   | 0.00035055 | 1.29307432 |
| ATP6V1D     | NM_015994.2 | ATP6V1D      | 14 | Homo sapiens ATP6M; VATD;    | 2.92E-07   | 1.00E-05   | 1.29205344 |
| TTC37       | NM_014639.2 | TTC37        | 5  | Homo sapiens MGC32587; T     | 0.00152151 | 0.00459454 | 1.29128458 |
| BPHL        | NM_004332.1 | BPHL         | 6  | Homo sapiens MGC125930; I    | 0.00266807 | 0.00706544 | 1.29101645 |
| BMP4        | NM_001202.2 | BMP4         | 14 | Homo sapiens BMP2B1; BMP     | 1.36E-05   | 0.00013748 | 1.29057484 |
| SLC35A5     | NM_017945.2 | SLC35A5      | 3  | Homo sapiens FLJ25973; DK    | 0.00621316 | 0.01374127 | 1.29047724 |
| ASAP1       | NM_018482.2 | ASAP1        | 8  | Homo sapiens ZG14P; AMAP     | 4.08E-06   | 6.04E-05   | 1.29024443 |
| TEX2        | NM_018469.3 | TEX2         | 17 | Homo sapiens KIAA1738; TM    | 3.29E-05   | 0.00026653 | 1.28947665 |
| ADCK2       | NM_052853.3 | ADCK2        | 7  | Homo sapiens MGC20727; A     | 0.00012144 | 0.00066291 | 1.28776512 |
| C9orf58     | NM_00100226 | C9ORF58      | 9  | Homo sapiens MGC29466; FL    | 0.01424085 | 0.02648803 | 1.28651062 |
| TMEM111     | NM_018447.1 | TMEM111      | 3  | Homo sapiens POB             | 0.00104278 | 0.00340534 | 1.28604401 |
| GRN         | NM_002087.2 | GRN          | 17 | Homo sapiens PEPI; PGRN; P   | 7.86E-05   | 0.00048954 | 1.28576876 |
| CALM1       | NM_006888.2 | CALM1        | 14 | Homo sapiens PHKD; CALML     | 3.72E-07   | 1.21E-05   | 1.28546603 |
| TUBB2A      | TUBB        | TUBB2A       | 6  | Homo sapiens TUBB; TUBB2;    | 1.23E-05   | 0.00012838 | 1.28539584 |
| SRXN1       | NM_080725.1 | SRXN1        | 20 | Homo sapiens Npn3; SRX1; C   | 9.13E-07   | 2.17E-05   | 1.28444784 |
| HCCA2       | NM_053005.2 | HCCA2        | 11 | Homo sapiens MOB2            | 0.01033706 | 0.02061343 | 1.2842189  |
| UROS        | NM_000375.1 | UROS         | 10 | Homo sapiens uroporphyrino   | 1.23E-06   | 2.64E-05   | 1.28318105 |
| CRIPAK      | NM_175918.2 | CRIPAK       | 4  | Homo sapiens FLJ34443        | 0.00460254 | 0.01085041 | 1.28305861 |
| SKIV2L      | NM_006929.4 | SKIV2L       | 6  | Homo sapiens SKIV2; DDX1     | 0.00279748 | 0.00733841 | 1.28238961 |
| ITGA5       | NM_002205.2 | ITGA5        | 12 | Homo sapiens CD49e; VLA5A    | 0.00062637 | 0.00230136 | 1.28081893 |
| LSR         | NM_205834.2 | LSR          | 19 | Homo sapiens MGC48312; LI    | 0.00111226 | 0.00358482 | 1.27946519 |
| STK19       | NM_032454.1 | STK19        | 6  | Homo sapiens RP1; G11; D6;   | 0.00096783 | 0.00320292 | 1.2790142  |
| ALDH2       | NM_000690.2 | ALDH2        | 12 | Homo sapiens ALDM; ALDH-I    | 0.00090116 | 0.00303213 | 1.27826399 |
| SLC25A13    | NM_014251.1 | SLC25A13     | 7  | Homo sapiens CTLN2; ARALA    | 0.00591062 | 0.01320111 | 1.27813662 |
| ATP6V0E2    | NM_145230.1 | ATP6V0E2     | 7  | Homo sapiens ATP6V0E2L; C    | 2.88E-07   | 1.01E-05   | 1.27784003 |
| LOC10013413 | XM_00172085 | LOC100134134 | 8  | PREDICTED: Homo sapiens s    | 2.45E-07   | 9.12E-06   | 1.27706577 |
| TSTA3       | NM_003313.2 | TSTA3        | 8  | Homo sapiens FX; P35B        | 0.00495072 | 0.01149176 | 1.27455553 |
| C12orf44    | NM_021934.3 | C12ORF44     | 12 | Homo sapiens FLJ11773        | 7.14E-06   | 8.88E-05   | 1.27432278 |
|             | Hs.534061   | HS.534061    | 17 | full-length cDNA clone XCL0E | 4.61E-06   | 6.56E-05   | 1.27355816 |
| EPHA1       | NM_005232.3 | EPHA1        | 7  | Homo sapiens EPHT; MGC16     | 0.00068551 | 0.00246204 | 1.27338363 |
| LOC653297   | XM_926730.1 | LOC653297    | 8  | PREDICTED: Homo sapiens s    | 0.01303042 | 0.02468444 | 1.27298984 |
| LHX2        | NM_004789.3 | LHX2         | 9  | Homo sapiens LH2; hLhx2; N   | 0.00012943 | 0.00069431 | 1.27253659 |
| FOXD2       | NM_004474.2 | FOXD2        | 1  | Homo sapiens FREAC-9; FKH    | 0.01566607 | 0.02851429 | 1.27238592 |
| SMAD5       | NM_005903.5 | SMAD5        | 5  | Homo sapiens Dwfc; DKFZp7    | 3.83E-05   | 0.00029719 | 1.27212038 |
| ZFHX3       | NM_006885.2 | ZFHX3        | 16 | Homo sapiens ATBF1; ZFHX3    | 0.0102477  | 0.02046528 | 1.27134614 |
| ASRGL1      | NM_025080.2 | ASRGL1       | 11 | Homo sapiens ALP1; ALP; FL   | 0.01686618 | 0.03018305 | 1.27132634 |
| FBXL18      | NM_024963.2 | FBXL18       | 1  | Homo sapiens FLJ11467; FLJ   | 5.72E-05   | 0.00039237 | 1.27131922 |
| LOC10013442 | XR_038546.1 | LOC100134424 | 12 | PREDICTED: Homo sapiens n    | 0.02913364 | 0.04612827 | 1.26964819 |
| PLCG1       | NM_182811.1 | PLCG1        | 20 | Homo sapiens PLC1; PLCgam    | 0.01678025 | 0.03010362 | 1.26875523 |
| NDRG3       | NM_022477.2 | NDRG3        | 20 | Homo sapiens FLJ13556        | 4.09E-05   | 0.00031197 | 1.26848935 |
| CYB5D2      | NM_144611.2 | CYB5D2       | 17 | Homo sapiens MGC32124        | 0.00182912 | 0.00527431 | 1.26807314 |
| RABEP1      | NM_004703.3 | RABEP1       | 17 | Homo sapiens RABPT5; RABP    | 3.14E-05   | 0.00025717 | 1.26738318 |
| C9orf5      | NM_032012.1 | C9ORF5       | 9  | Homo sapiens CG2; FLJ3322    | 9.25E-05   | 0.00054731 | 1.26716419 |
| TPRG1L      | NM_182752.3 | TPRG1L       | 1  | Homo sapiens RP11-46F15.3    | 4.29E-07   | 1.33E-05   | 1.26715465 |
| AXIN2       | NM_004655.2 | AXIN2        | 17 | Homo sapiens MGC126582; I    | 9.08E-05   | 0.00054135 | 1.26714582 |
| C20orf46    | NM_018354.1 | C20ORF46     | 20 | Homo sapiens FLJ11190        | 3.65E-05   | 0.00028722 | 1.26631783 |
| STAT2       | NM_005419.2 | STAT2        | 12 | Homo sapiens ISGF-3; STAT1   | 2.91E-05   | 0.00024377 | 1.26572209 |

## 2.0 ACL-Independent Upreg

|             |                         |                                 |            |            |            |
|-------------|-------------------------|---------------------------------|------------|------------|------------|
| C9orf119    | XM_937771.1 C9ORF119    | 9 Homo sapiens bA395P17.9       | 0.0014532  | 0.00442639 | 1.26521105 |
| RNFT2       | NM_032814.3 RNFT2       | 12 Homo sapiens FLJ14627; TM    | 0.00014144 | 0.00073829 | 1.26475321 |
| IFNGR1      | NM_000416.1 IFNGR1      | 6 Homo sapiens CD119; IFNGR     | 7.69E-06   | 9.31E-05   | 1.26360721 |
| KIF1B       | NM_183416.2 KIF1B       | 1 Homo sapiens KIAA0591; HM     | 0.00150281 | 0.00455199 | 1.26338138 |
| ISG15       | NM_005101.1 ISG15       | 1 Homo sapiens G1P2; UCRP; I    | 5.78E-07   | 1.61E-05   | 1.26329615 |
| C1orf50     | NM_024097.1 C1ORF50     | 1 Homo sapiens MGC955           | 0.00067786 | 0.00243858 | 1.26301969 |
| FLYWCH2     | NM_138439.1 FLYWCH2     | 16 Homo sapiens FLYWCH family   | 0.00899738 | 0.01845668 | 1.26296035 |
| PPP1R2      | NM_006221.3 PPP1R2      | 3 Homo sapiens MGC87148; IF     | 9.19E-06   | 0.00010519 | 1.26290911 |
| TPST1       | NM_003596.2 TPST1       | 7 Homo sapiens tyrosylprotein   | 0.00345224 | 0.00864094 | 1.26273594 |
| SNAPC2      | NM_003083.1 SNAPC2      | 19 Homo sapiens PTFdelta; SNA   | 0.00023111 | 0.00106924 | 1.26211186 |
| LOC728014   | XM_946270.1 LOC728014   | 12 PREDICTED: Homo sapiens s    | 5.05E-05   | 0.00036047 | 1.26195743 |
| C2orf64     | NM_00100821 C2ORF64     | 2 Homo sapiens 6330578E17R      | 0.00164301 | 0.00486811 | 1.26139353 |
| SBF1        | NM_002972.1 SBF1        | 22 Homo sapiens DKFZp761D04     | 1.09E-05   | 0.00011784 | 1.2606742  |
| ID3         | NM_002167.2 ID3         | 1 Homo sapiens HEIR-1           | 2.52E-08   | 2.21E-06   | 1.25954736 |
| LAPTM4A     | NM_014713.3 LAPTM4A     | 2 Homo sapiens LAPTM4; KIAA     | 0.00027948 | 0.00123272 | 1.25936679 |
| PACSIN2     | NM_000221.3 PACSIN2     | 22 Homo sapiens SDPII           | 1.94E-06   | 3.61E-05   | 1.25920388 |
| ANXA2P3     | NR_001446.1 ANXA2P3     | 10 Homo sapiens ANX2L3; LIP2;   | 0.01292384 | 0.02454671 | 1.25889736 |
| HSPC157     | NR_023919.1 HSPC157     | 1 Homo sapiens hypothetical L   | 0.00174721 | 0.00510861 | 1.2586826  |
| GGH         | NM_003878.1 GGH         | 8 Homo sapiens GH               | 3.10E-06   | 4.98E-05   | 1.25688918 |
| SUPT5H      | NM_003169.2 SUPT5H      | 19 Homo sapiens SPT5H; SPT5;    | 0.00010081 | 0.00058153 | 1.25601473 |
| RNF165      | NM_152470.2 RNF165      | 18 Homo sapiens ring finger pro | 0.02394532 | 0.03974308 | 1.25444012 |
| MUM1        | NM_032853.2 MUM1        | 19 Homo sapiens MGC163315; I    | 7.93E-06   | 9.51E-05   | 1.25418196 |
| FLNC        | NM_001458.2 FLNC        | 7 Homo sapiens FLN2; ABPL; A    | 7.32E-06   | 9.03E-05   | 1.25379348 |
| STX1A       | NM_004603.1 STX1A       | 7 Homo sapiens HPC-1; STX1;     | 0.00033562 | 0.00142039 | 1.25285666 |
| LPCAT3      | NM_005768.5 LPCAT3      | 12 Homo sapiens C3F; OACT5; r   | 1.69E-05   | 0.00016367 | 1.25213054 |
| PPIC        | NM_000943.4 PPIC        | 5 Homo sapiens MGC3673; CYI     | 0.0001476  | 0.0007642  | 1.25165056 |
| ADD3        | NM_019903.3 ADD3        | 10 Homo sapiens ADDL            | 0.0002698  | 0.00119876 | 1.25150887 |
| TOP3B       | NM_003935.3 TOP3B       | 22 Homo sapiens FLJ39376        | 0.00086508 | 0.00293711 | 1.25132046 |
| MGMT        | NM_002412.2 MGMT        | 10 Homo sapiens O-6-methylgu.   | 0.0031719  | 0.00808258 | 1.25125937 |
| CMTM3       | NM_144601.2 CMTM3       | 16 Homo sapiens BNAS2; CKLF5    | 0.01423406 | 0.02648446 | 1.25039969 |
| UBE2E2      | NM_152653.1 UBE2E2      | 3 Homo sapiens UBCH8; FLJ25     | 0.00095033 | 0.00315942 | 1.24946866 |
| HNRPLL      | NM_138394.2 HNRPLL      | 2 Homo sapiens SRRF             | 0.00247013 | 0.00665147 | 1.24924943 |
| FAR1        | NM_032228.4 FAR1        | 11 Homo sapiens FLJ33561; FAF   | 0.00373353 | 0.00920927 | 1.24826383 |
| GPRC5A      | NM_003979.3 GPRC5A      | 12 Homo sapiens RAIG1; RAI3;    | 0.0037921  | 0.00930306 | 1.24783922 |
| SLC9A3R1    | NM_004252.1 SLC9A3R1    | 17 Homo sapiens NHERF1; NHEI    | 5.97E-07   | 1.65E-05   | 1.24695219 |
| ZFP90       | NM_133458.1 ZFP90       | 16 Homo sapiens ZNF756; NK10    | 0.00972761 | 0.0196505  | 1.24675987 |
| GUSBL1      | NM_00103352 GUSBL1      | 6 Homo sapiens bA239L20.5; t    | 0.00355491 | 0.0088849  | 1.24612397 |
| TERC        | NR_001566.1 TERC        | 3 Homo sapiens TRC3; TR; hTF    | 0.0045061  | 0.01066238 | 1.24521952 |
| TUBB4Q      | NM_020040.3 TUBB4Q      | 4 Homo sapiens tubulin, beta p  | 2.44E-05   | 0.00021485 | 1.2447552  |
|             | Hs.14555 HS.14555       | 10 Homo sapiens cDNA: FLJ215    | 0.00074929 | 0.00263451 | 1.24443455 |
| C16orf56    | NM_025082.1 C16ORF56    | 16 Homo sapiens FLJ13111        | 0.00051011 | 0.00195896 | 1.24413872 |
| PSMD3       | NM_002809.2 PSMD3       | 17 Homo sapiens RPN3; P58; S    | 0.01018655 | 0.02038059 | 1.24398001 |
| H1FX        | NM_006026.2 H1FX        | 3 Homo sapiens MGC8350; H1      | 0.00018003 | 0.00088892 | 1.24393421 |
| CMAS        | NM_018686.3 CMAS        | 12 Homo sapiens cytidine mono   | 2.54E-06   | 4.35E-05   | 1.24347141 |
| UCRC        | NM_00100368 UCRC        | 22 Homo sapiens HSPC151; HSF    | 0.00028469 | 0.00125061 | 1.24345823 |
| CTSA        | NM_000308.1 CTSA        | 20 Homo sapiens NGBE; PPCA; r   | 0.00325382 | 0.00823534 | 1.24339648 |
| SGTA        | NM_003021.3 SGTA        | 19 Homo sapiens hSGT; SGT       | 0.00432222 | 0.01029225 | 1.24306129 |
| LZTR1       | NM_006767.2 LZTR1       | 22 Homo sapiens MGC21205; T     | 5.01E-06   | 6.90E-05   | 1.2430498  |
| FLOT1       | NM_005803.2 FLOT1       | 6 Homo sapiens flotillin 1 (FLO | 4.68E-05   | 0.00034342 | 1.24282622 |
| LOC10013009 | XR_039545.1 LOC10013009 | 8 PREDICTED: Homo sapiens n     | 0.00328573 | 0.00829293 | 1.24275287 |
| OBFC2A      | NM_022837.1 OBFC2A      | 2 Homo sapiens MGC111163; I     | 0.00033746 | 0.00142592 | 1.24225571 |
| SMAP2       | NM_022733.1 SMAP2       | 1 Homo sapiens SMAP1L; RP1-     | 5.82E-05   | 0.00039577 | 1.24153402 |
| NUCB2       | NM_005013.1 NUCB2       | 11 Homo sapiens NEFA            | 0.00042153 | 0.00169423 | 1.24145572 |
| CCDC50      | NM_174908.2 CCDC50      | 3 Homo sapiens C3orf6; DFNA     | 0.00035186 | 0.00147532 | 1.24132717 |
| KRT18P28    | XR_017689.1 KRT18P28    | 1 PREDICTED: Homo sapiens n     | 0.00338549 | 0.00849735 | 1.24131622 |
| TESC        | NM_017899.1 TESC        | 12 Homo sapiens TSC; FLJ2060    | 0.00028079 | 0.00123599 | 1.24114286 |
| LAMC1       | NM_002293.2 LAMC1       | 1 Homo sapiens LAMB2; MGC8      | 1.10E-06   | 2.46E-05   | 1.24074076 |
| ITGA2       | NM_002203.2 ITGA2       | 5 Homo sapiens CD49B; VLAA      | 0.01163353 | 0.02265423 | 1.24048056 |
| HSPA5       | NM_005347.2 HSPA5       | 9 Homo sapiens BIP; FLJ26106    | 3.89E-05   | 0.00030018 | 1.24022959 |
| SNORA12     | NR_002954.1 SNORA12     | 10 Homo sapiens U108            | 3.46E-07   | 1.16E-05   | 1.2398526  |
| PPM1D       | NM_003620.2 PPM1D       | 17 Homo sapiens PP2C-DELTA; \   | 0.0004802  | 0.00186987 | 1.23985196 |
| ANKRD13A    | NM_033121.1 ANKRD13A    | 12 Homo sapiens ANKRD13; NY-    | 0.01242385 | 0.02381348 | 1.23953221 |
| C9orf69     | NM_152833.2 C9ORF69     | 9 Homo sapiens bA83N9.1         | 0.00671604 | 0.01464484 | 1.23949392 |
| CPNE1       | NM_003915.2 CPNE1       | 20 Homo sapiens CPN1; COPN1;    | 7.06E-06   | 8.85E-05   | 1.2390604  |
| ZBTB17      | NM_003443.1 ZBTB17      | 1 Homo sapiens ZNF60; pHZ-6     | 0.00469425 | 0.01100218 | 1.23777254 |
| CSAG3A      | NM_203311.1 CSAG3A      | Homo sapiens MGC17065           | 0.01554137 | 0.0283443  | 1.23770814 |
| CRK         | NM_016823.2 CRK         | 17 Homo sapiens CRKII           | 4.22E-05   | 0.00031948 | 1.23742015 |
| MTIF3       | NM_152912.3 MTIF3       | 13 Homo sapiens IF-3mt; IF3(m   | 9.08E-05   | 0.00054137 | 1.23602811 |
| KIFC2       | NM_145754.2 KIFC2       | 8 Homo sapiens kinesin family   | 4.03E-06   | 6.00E-05   | 1.23592311 |
| C17orf63    | NM_018182.1 C17ORF63    | 17 Homo sapiens FLJ10700        | 0.02415739 | 0.04002173 | 1.23563481 |

## 2.0 ACL-Independent Upreg

|           |                       |   |                                |            |            |            |
|-----------|-----------------------|---|--------------------------------|------------|------------|------------|
| NTAN1     | NM_173474.2 NTAN1     |   | 16 Homo sapiens DKFZp666E05    | 0.00164768 | 0.0048753  | 1.23543974 |
|           | Hs.374278 HS.374278   |   | 16 Homo sapiens cDNA FLJ3838   | 0.00921781 | 0.01880946 | 1.23470498 |
| PTK7      | NM_152880.2 PTK7      |   | 6 Homo sapiens CCK4            | 0.00536405 | 0.01220868 | 1.23452407 |
| LOC730455 | NM_015027.1 LOC730455 |   | PREDICTED: Homo sapiens s      | 0.00033216 | 0.00140959 | 1.23364237 |
| RAB40B    | NM_006822.1 RAB40B    |   | 17 Homo sapiens FLJ42385; SE   | 2.03E-05   | 0.00018805 | 1.23362123 |
| CD9       | NM_001769.2 CD9       |   | 12 Homo sapiens MRP-1; MIC3;   | 7.44E-05   | 0.00047047 | 1.2335332  |
| CDKN1A    | NM_078467.1 CDKN1A    |   | 6 Homo sapiens P21; MDA-6; S   | 1.41E-06   | 2.92E-05   | 1.23341977 |
| NKD2      | NM_033120.2 NKD2      |   | 5 Homo sapiens Naked2          | 1.95E-05   | 0.00018205 | 1.23316207 |
| CREB3L2   | NM_194071.2 CREB3L2   |   | 7 Homo sapiens MGC131709; I    | 7.62E-05   | 0.00047872 | 1.23297042 |
| STK38     | NM_007271.2 STK38     |   | 6 Homo sapiens NDR1; NDR       | 0.00105457 | 0.00343249 | 1.23275593 |
| PI4KAP2   | NM_199345.2 PI4KAP2   |   | Homo sapiens FLJ44912; MG      | 6.08E-06   | 7.93E-05   | 1.23242492 |
| C3orf52   | NM_024616.1 C3ORF52   |   | 3 Homo sapiens FLJ23186; TT    | 0.01750008 | 0.03102118 | 1.23188353 |
| CORO1C    | NM_014325.2 CORO1C    |   | 12 Homo sapiens HCRNN4; coro   | 4.99E-05   | 0.00035774 | 1.23184483 |
| LSMD1     | NM_032356.3 LSMD1     |   | 17 Homo sapiens PFAAP2; MGC1   | 1.11E-05   | 0.0001196  | 1.23174151 |
| C16orf57  | NM_024598.2 C16ORF57  |   | 16 Homo sapiens FLJ13154       | 7.03E-06   | 8.84E-05   | 1.2317126  |
| TMEM158   | NM_015444.1 TMEM158   |   | 16 Homo sapiens BBP; DKFZp5E   | 3.71E-07   | 1.21E-05   | 1.23090534 |
| PLEKHG4   | NM_015432.2 PLEKHG4   |   | 16 Homo sapiens puratrophin1;  | 0.01659455 | 0.02983451 | 1.23087435 |
| CKB       | NM_001823.3 CKB       |   | 14 Homo sapiens B-CK; CKBB     | 2.54E-07   | 9.34E-06   | 1.23082301 |
| INTS12    | NM_020395.2 INTS12    |   | 4 Homo sapiens PHF22; INT12    | 3.84E-05   | 0.00029762 | 1.22967403 |
| MT1E      | NM_175617.2 MT1E      |   | 16 Homo sapiens MT1; MTD       | 4.75E-06   | 6.67E-05   | 1.22907924 |
| RAB5C     | NM_201434.1 RAB5C     |   | 17 Homo sapiens RAB5CL; RABL   | 0.00118509 | 0.00376596 | 1.22870072 |
| DPYSL2    | NM_001386.4 DPYSL2    |   | 8 Homo sapiens DHPRP2; DRP-    | 7.98E-07   | 1.97E-05   | 1.22856304 |
| FGFR3     | NM_000142.2 FGFR3     |   | 4 Homo sapiens HSGFR3EX; J     | 3.70E-05   | 0.00028958 | 1.22835762 |
| EFNB2     | NM_004093.2 EFNB2     |   | 13 Homo sapiens MGC126227; I   | 1.05E-05   | 0.00011534 | 1.22828476 |
| ELOF1     | NM_032377.2 ELOF1     |   | 19 Homo sapiens ELF1           | 0.00091374 | 0.00306782 | 1.22767556 |
| FLJ20021  | XM_028217.4 FLJ20021  |   | 4 PREDICTED: Homo sapiens h    | 0.00028879 | 0.00126146 | 1.22734962 |
| STUB1     | NM_005861.2 STUB1     |   | 16 Homo sapiens CHIP; SDCCA    | 1.17E-05   | 0.00012311 | 1.22678393 |
| ALS2      | NM_020919.2 ALS2      |   | 2 Homo sapiens MGC87187; IA    | 0.00122175 | 0.00384757 | 1.22609398 |
| SH3BGR13  | NM_031286.2 SH3BGR13  |   | 1 Homo sapiens TIP-B1; SH3B    | 0.00116962 | 0.00373536 | 1.22592147 |
| RUNX3     | NM_004350.1 RUNX3     |   | 1 Homo sapiens FLJ34510; MG    | 0.00375374 | 0.00924443 | 1.22406782 |
| FRMD8     | NM_031904.3 FRMD8     |   | 11 Homo sapiens MGC31785; F    | 0.00329844 | 0.0083192  | 1.2232835  |
| PINK1     | NM_032409.1 PINK1     |   | 1 Homo sapiens FLJ27236; PA    | 0.0017892  | 0.00519364 | 1.22305184 |
| LOC149501 | XR_017100.2 LOC149501 |   | 1 PREDICTED: Homo sapiens n    | 3.50E-07   | 1.16E-05   | 1.2226984  |
| MTMR9     | NM_015458.3 MTMR9     |   | 8 Homo sapiens LIP-STYX; C8c   | 0.00114199 | 0.00366111 | 1.22242139 |
| SPIRE1    | NM_020148.1 SPIRE1    |   | 18 Homo sapiens Spir-1; MGC1   | 0.0002229  | 0.00104235 | 1.22218395 |
| IGFBP2    | NM_000597.2 IGFBP2    |   | 2 Homo sapiens IGF-BP53; IBP   | 6.63E-05   | 0.00043602 | 1.22211271 |
| RHBDD2    | NM_00104045 RHBDD2    |   | 7 Homo sapiens NPD007; RHB     | 1.81E-06   | 3.45E-05   | 1.22206339 |
| PIK4CA    | NM_058004.1 PIK4CA    |   | 22 Homo sapiens pi4K230; FLJ1  | 0.00022257 | 0.00104128 | 1.22200735 |
| PDLIM1    | NM_020992.2 PDLIM1    |   | 10 Homo sapiens CLP36; CLP-3   | 1.48E-05   | 0.00014698 | 1.22199004 |
| NUDT22    | NM_032344.1 NUDT22    |   | 11 Homo sapiens MGC13045       | 0.0080869  | 0.01695379 | 1.2217272  |
| C20orf3   | NM_020531.2 C20ORF3   |   | 20 Homo sapiens BSCV; APMAP    | 4.64E-05   | 0.00034094 | 1.22092371 |
| GPR137    | NM_020155.2 GPR137    |   | 11 Homo sapiens GPR137A; TM    | 0.00049253 | 0.00190693 | 1.22065834 |
| CKLF      | NM_016326.2 CKLF      |   | 16 Homo sapiens UCK-1; CKLF1   | 8.92E-06   | 0.0001028  | 1.22053587 |
| CDKN3     | NM_005192.2 CDKN3     |   | 14 Homo sapiens CD11; KAP; M   | 7.05E-06   | 8.84E-05   | 1.21976893 |
| APPBP2    | NM_006380.2 APPBP2    |   | 17 Homo sapiens PAT1; KIAA02   | 0.00041593 | 0.00167918 | 1.21958531 |
| MMD       | NM_012329.2 MMD       |   | 17 Homo sapiens PAQR11; MMA    | 6.78E-06   | 8.66E-05   | 1.21940646 |
| LIMA1     | NM_016357.3 LIMA1     |   | 12 Homo sapiens SREBP3; EPLI   | 0.00107167 | 0.00347772 | 1.21926236 |
| CHMP2A    | NM_198426.1 CHMP2A    |   | 19 Homo sapiens VPS2; VPS2A;   | 7.15E-05   | 0.00045786 | 1.2191341  |
|           | Hs.475334 HS.475334   |   | 11 Human mRNA for KIAA0280     | 0.0008472  | 0.00288723 | 1.21870035 |
| CDH1      | NM_004360.2 CDH1      |   | 16 Homo sapiens CDHE; Arc-1;   | 8.05E-06   | 9.61E-05   | 1.21855076 |
| MAOB      | NM_000898.3 MAOB      | X | Homo sapiens MGC26382          | 0.00021491 | 0.00101418 | 1.21743354 |
| ABCB9     | NM_203444.1 ABCB9     |   | 12 Homo sapiens TAPL; KIAA15   | 0.00166285 | 0.00490549 | 1.21630778 |
| RPL23AP13 | NR_002229.1 RPL23AP13 |   | 2 Homo sapiens DKFZp547I01     | 0.01354922 | 0.02544106 | 1.21626393 |
| TIMP1     | NM_003254.2 TIMP1     | X | Homo sapiens TIMP; FLJ903;     | 2.12E-07   | 8.42E-06   | 1.2162416  |
| C16orf48  | NM_032140.1 C16ORF48  |   | 16 Homo sapiens DAKV6410; DI   | 2.32E-05   | 0.00020643 | 1.21602332 |
| PIAS1     | NM_016166.1 PIAS1     |   | 15 Homo sapiens MGC141879; I   | 0.00157503 | 0.00471554 | 1.21530674 |
| GNPTG     | NM_032520.3 GNPTG     |   | 16 Homo sapiens GNPTAG; LP2    | 0.00296131 | 0.00767554 | 1.2152728  |
| PTTG1IP   | NM_004339.2 PTTG1IP   |   | 21 Homo sapiens C21orf3; C21c  | 8.58E-06   | 0.0001003  | 1.21501086 |
| HEBP1     | NM_015987.3 HEBP1     |   | 12 Homo sapiens HBP; HEBP      | 9.94E-05   | 0.00057593 | 1.21453178 |
| PRUNE     | NM_021222.1 PRUNE     |   | 1 Homo sapiens DRES-17; HTC    | 0.02596685 | 0.04231    | 1.21381093 |
| UBTD1     | NM_024954.3 UBTD1     |   | 10 Homo sapiens FLJ11807       | 0.00497043 | 0.01152028 | 1.21353903 |
| HLA-H     | NR_001434.1 HLA-H     |   | 6 Homo sapiens HLAHP           | 5.01E-05   | 0.00035818 | 1.21331877 |
| GDI1      | NM_001493.1 GDI1      | X | Homo sapiens OPHN2; MRX4       | 4.10E-05   | 0.00031257 | 1.21276514 |
| PRRC1     | NM_130809.2 PRRC1     |   | 5 Homo sapiens FLJ32875        | 0.00032862 | 0.00139782 | 1.21225091 |
| THYN1     | NM_014174.2 THYN1     |   | 11 Homo sapiens MY105; MGC1    | 0.00069098 | 0.00247841 | 1.21213678 |
| ATP6V0A1  | NM_005177.2 ATP6V0A1  |   | 17 Homo sapiens ATP6N1; VPP1   | 1.16E-06   | 2.56E-05   | 1.21183928 |
| SPHK2     | NM_020126.3 SPHK2     |   | 19 Homo sapiens sphingosine ki | 0.00352761 | 0.0087992  | 1.21157995 |
| C14orf2   | NM_004894.1 C14ORF2   |   | 14 Homo sapiens PLPM; MP68     | 7.30E-05   | 0.00046445 | 1.21151817 |
| ATP6AP2   | NM_005765.2 ATP6AP2   | X | Homo sapiens ELDF10; APT6      | 3.99E-07   | 1.27E-05   | 1.21124589 |
| FNDC3B    | NM_00113509 FNDC3B    |   | 3 Homo sapiens fibronectin typ | 0.00023221 | 0.00107255 | 1.21049738 |

## 2.0 ACL-Independent Upreg

|           |                       |                                   |            |            |            |
|-----------|-----------------------|-----------------------------------|------------|------------|------------|
| ALDOC     | NM_005165.2 ALDOC     | 17 Homo sapiens ALDC              | 7.08E-06   | 8.85E-05   | 1.20985387 |
| TMEM41B   | NM_015012.1 TMEM41B   | 11 Homo sapiens MGC33897; KIAA161 | 3.48E-06   | 5.44E-05   | 1.20917869 |
| C5orf32   | NM_032412.2 C5ORF32   | 5 Homo sapiens ORF1-FL49          | 0.00029129 | 0.00126883 | 1.2089001  |
| LYPLAL1   | NM_138794.1 LYPLAL1   | 1 Homo sapiens KIAA1238           | 1.02E-05   | 0.00011292 | 1.20712241 |
| RALY      | NM_007367.2 RALY      | 20 Homo sapiens P542; MGC111      | 4.78E-05   | 0.00034772 | 1.20677359 |
| LOC648980 | XM_941280.2 LOC648980 | 22 PREDICTED: Homo sapiens s      | 0.01615506 | 0.02923296 | 1.20677042 |
| NLGN2     | NM_020795.2 NLGN2     | 17 Homo sapiens KIAA1366          | 0.00304169 | 0.0078186  | 1.20658791 |
| C1orf115  | NM_024709.2 C1ORF115  | 1 Homo sapiens FLJ14146; RP:      | 0.00075448 | 0.00264849 | 1.20654264 |
| MFSD3     | NM_138431.1 MFSD3     | 8 Homo sapiens major facilitat    | 6.54E-06   | 8.40E-05   | 1.20622264 |
| MAPRE2    | NM_014268.1 MAPRE2    | 18 Homo sapiens RP1; EB1; EB2     | 0.00039611 | 0.00161415 | 1.20622196 |
| XPR1      | NM_004736.3 XPR1      | 1 Homo sapiens xenotropic anc     | 0.00012978 | 0.00069548 | 1.20580112 |
| INTS5     | NM_030628.1 INTS5     | 11 Homo sapiens INT5; KIAA161     | 0.0023749  | 0.00644456 | 1.2053578  |
| MLXIPL    | NM_032994.1 MLXIPL    | 7 Homo sapiens WS-bHLH; MIO       | 0.00197311 | 0.00558141 | 1.20523309 |
| LOC441763 | XM_930284.1 LOC441763 | 16 PREDICTED: Homo sapiens h      | 0.00013189 | 0.00070297 | 1.20509592 |
| MANBA     | NM_005908.2 MANBA     | 4 Homo sapiens MANB1              | 0.00171837 | 0.00504327 | 1.20451616 |
| PSMD13    | NM_002817.2 PSMD13    | 11 Homo sapiens HSPC027; p4C      | 0.00564616 | 0.01271498 | 1.20446329 |
| LOC643431 | XM_928128.1 LOC643431 | 5 PREDICTED: Homo sapiens s       | 8.67E-05   | 0.00052335 | 1.20382065 |
| DUSP1     | NM_004417.2 DUSP1     | 5 Homo sapiens HVH1; MKP1;        | 5.70E-05   | 0.00039187 | 1.20364937 |
| SPC24     | NM_182513.1 SPC24     | 19 Homo sapiens SPBC24; FLJ91     | 0.00222929 | 0.00611817 | 1.20351457 |
| ANAPC11   | XM_942695.1 ANAPC11   | PREDICTED: Homo sapiens A         | 0.00156629 | 0.00469843 | 1.20347588 |
| VGLL4     | NM_014667.1 VGLL4     | 3 Homo sapiens VGL-4; KIAA0:      | 0.00264489 | 0.0070246  | 1.20220659 |
| LEP       | NM_000230.1 LEP       | 7 Homo sapiens OB; OBS            | 0.00656761 | 0.01438468 | 1.20213026 |
| AFMID     | NM_00101098 AFMID     | 17 Homo sapiens KF; DKFZp686      | 0.0318102  | 0.04922586 | 1.20168901 |
| DIABLO    | NM_138930.2 DIABLO    | 12 Homo sapiens SMAC; FLJ105      | 8.59E-06   | 0.00010024 | 1.20113449 |
| ATP1B3    | NM_001679.2 ATP1B3    | PREDICTED: Homo sapiens A         | 1.66E-06   | 3.31E-05   | 1.20113208 |
| FBXO31    | NM_024735.2 FBXO31    | 16 Homo sapiens FBX14; Fbx31      | 7.09E-05   | 0.00045565 | 1.20110659 |
| MTMR10    | NM_017762.1 MTMR10    | 15 Homo sapiens FLJ20313          | 0.00316871 | 0.00807824 | 1.20110262 |
| SNX2      | NM_003100.2 SNX2      | 5 Homo sapiens TRG-9; MGC5:       | 4.31E-05   | 0.00032417 | 1.2010261  |
| CCDC23    | NM_199342.1 CCDC23    | 1 Homo sapiens coiled-coil don    | 6.89E-06   | 8.72E-05   | 1.19920498 |
| FKBP11    | NM_016594.1 FKBP11    | 12 Homo sapiens MGC54182; Ff      | 0.02971203 | 0.04677827 | 1.19907976 |
| KIAA0494  | NM_014774.1 KIAA0494  | 1 Homo sapiens RP11-8J9.3         | 0.00129886 | 0.00404124 | 1.19805669 |
| TTC1      | NM_003314.1 TTC1      | 5 Homo sapiens TPR1               | 0.00199535 | 0.00563112 | 1.19804761 |
| CDC42     | NM_044472.1 CDC42     | 1 Homo sapiens CDC42Hs; G2!       | 0.00106607 | 0.00346266 | 1.19791732 |
| C12orf31  | NM_032338.2 C12ORF31  | 12 Homo sapiens MGC104302; I      | 0.00038004 | 0.00156035 | 1.19781384 |
| PDIA4     | NM_004911.3 PDIA4     | 7 Homo sapiens ERP72; ERP70       | 0.02017111 | 0.03467019 | 1.19707393 |
| FAM107B   | NM_031453.2 FAM107B   | 10 Homo sapiens FLJ45505; C10     | 0.01475844 | 0.02721784 | 1.19706054 |
| DCTN3     | NM_024348.2 DCTN3     | 9 Homo sapiens MGC111190; I       | 0.00044117 | 0.00175242 | 1.1968891  |
| PTGR1     | NM_012212.2 PTGR1     | 9 Homo sapiens MGC34943           | 0.00010737 | 0.0006084  | 1.19667316 |
| AGPAT2    | NM_00101272 AGPAT2    | 9 Homo sapiens LPAAB; LPAAT:      | 0.00029789 | 0.0012919  | 1.19661911 |
| SFRS7     | NM_00103168 SFRS7     | 2 Homo sapiens 9G8; HSSG1;        | 0.00025118 | 0.00113129 | 1.1961977  |
| GIPC1     | NM_202468.1 GIPC1     | 19 Homo sapiens IIP-1; TIP-2; C   | 1.31E-05   | 0.00013383 | 1.19616785 |
| BLVRA     | NM_000712.3 BLVRA     | 7 Homo sapiens BVRA; BLVR         | 2.79E-05   | 0.0002369  | 1.19587007 |
| POMT2     | NM_013382.3 POMT2     | 14 Homo sapiens FLJ22309; DK      | 0.00284109 | 0.00741879 | 1.19540743 |
| BRSK1     | NM_032430.1 BRSK1     | 19 Homo sapiens KIAA1811; FL      | 0.00250738 | 0.00672015 | 1.19510457 |
| MFSD11    | NM_024311.2 MFSD11    | 17 Homo sapiens ET; FLJ22196;     | 0.01485078 | 0.02734637 | 1.19488853 |
| MTRF1L    | NM_019041.3 MTRF1L    | 6 Homo sapiens MGC102748          | 6.25E-05   | 0.00041614 | 1.19471263 |
| RICH2     | NM_014859.4 RICH2     | 17 Homo sapiens NPC-A-10; KIA     | 0.00186434 | 0.0053475  | 1.19454252 |
| HLTF      | NM_003071.2 HLTF      | 3 Homo sapiens ZBU1; SMAR         | 0.00027854 | 0.00122955 | 1.1942091  |
| RYBP      | NM_012234.3 RYBP      | 3 Homo sapiens DEDAF; YEAF1       | 0.00066551 | 0.00240292 | 1.19388134 |
| GABARAPL1 | NM_031412.2 GABARAPL1 | 12 Homo sapiens ATG8L; GEC1;      | 0.00299087 | 0.00772819 | 1.19375746 |
| FAM50A    | NM_004699.1 FAM50A    | Homo sapiens DXS9928E; 9F         | 3.69E-06   | 5.66E-05   | 1.19360902 |
| MTMR11    | NM_006697.1 MTMR11    | 1 Homo sapiens CRA; RP11-21       | 0.02127969 | 0.03622047 | 1.1930976  |
| STX3      | NM_004177.3 STX3      | 11 Homo sapiens STX3A             | 0.00084206 | 0.0028733  | 1.19303767 |
| ACSL3     | NM_004457.3 ACSL3     | 2 Homo sapiens PROC2194; FAC      | 0.00010149 | 0.00058423 | 1.19294095 |
| DPYSL3    | NM_001387.2 DPYSL3    | 5 Homo sapiens DRP3; CRMP4;       | 8.83E-05   | 0.00053192 | 1.19292879 |
| ZNF277    | NM_021994.1 ZNF277    | 7 Homo sapiens ZNF277P; ZNF       | 0.00030146 | 0.00130268 | 1.19271162 |
| PRAGMIN   | NM_00108082 PRAGMIN   | 8 Homo sapiens DKFZp761P04        | 5.24E-05   | 0.000369   | 1.19216298 |
| EGR1      | NM_001964.2 EGR1      | 5 Homo sapiens GOS30; AT225       | 4.06E-06   | 6.03E-05   | 1.19198961 |
| WDR45L    | NM_019613.2 WDR45L    | 17 Homo sapiens WIPI-3; WIPI3     | 0.00312537 | 0.00798836 | 1.19192541 |
| LUZP1     | NM_033631.2 LUZP1     | 1 Homo sapiens KIAA0601; LU       | 4.33E-05   | 0.0003249  | 1.19191532 |
| AP4B1     | NM_006594.1 AP4B1     | 1 Homo sapiens BETA-4             | 0.00113519 | 0.0036436  | 1.19166525 |
| FBXO46    | XM_942691.1 FBXO46    | 19 PREDICTED: Homo sapiens F      | 0.02441157 | 0.0403383  | 1.19160219 |
| PSAP      | NM_002778.1 PSAP      | 10 Homo sapiens GLBA; SAP1; I     | 8.32E-07   | 2.03E-05   | 1.19157324 |
| LOC647037 | XM_930029.1 LOC647037 | 15 PREDICTED: Homo sapiens s      | 0.00044614 | 0.00176699 | 1.19156716 |
| BSCL2     | NM_032667.4 BSCL2     | 11 Homo sapiens SPG17; MGC4       | 5.00E-05   | 0.00035785 | 1.19117115 |
| PLCG2     | NM_002661.1 PLCG2     | 16 Homo sapiens phospholipase     | 6.03E-05   | 0.00040493 | 1.1911564  |
| SEPX1     | NM_016332.2 SEPX1     | 16 Homo sapiens MSRB1; SELR;      | 0.00013483 | 0.00071269 | 1.19051094 |
| ACTR10    | NM_018477.1 ACTR10    | 14 Homo sapiens HARP11; ACTF      | 0.00016229 | 0.00081998 | 1.19003318 |
| SND1      | NM_014390.2 SND1      | 7 Homo sapiens TDRD11; p10C       | 0.00036456 | 0.00151225 | 1.18998993 |
| MSX1      | NM_002448.1 MSX1      | 4 Homo sapiens HOX7; HYD1         | 5.27E-06   | 7.16E-05   | 1.18980723 |

## 2.0 ACL-Independent Upreg

|           |               |           |                                |                           |            |            |            |
|-----------|---------------|-----------|--------------------------------|---------------------------|------------|------------|------------|
| LOC647954 | XM_938141.1   | LOC647954 | PREDICTED: Homo sapiens n      | 7.04E-05                  | 0.0004539  | 1.18953871 |            |
| TMEM141   | NM_032928.2   | TMEM141   | 9 Homo sapiens MGC14141; R     | 0.00147536                | 0.00448633 | 1.18951065 |            |
| LOC340598 | XM_926996.1   | LOC340598 | X                              | PREDICTED: Homo sapiens s | 0.00421135 | 0.01007905 | 1.18938926 |
| CLSTN1    | NM_00100956   | CLSTN1    | 1 Homo sapiens CSTN1; PIK3C    | 0.00011504                | 0.00063854 | 1.18919727 |            |
| AKR1B1    | NM_001628.2   | AKR1B1    | 7 Homo sapiens ALDR1; MGC1     | 1.93E-05                  | 0.00017991 | 1.18865368 |            |
| LLGL1     | NM_004140.3   | LLGL1     | 17 Homo sapiens HUGL; LLGL; I  | 0.00096183                | 0.00319082 | 1.18783353 |            |
| SLC1A5    | NM_005628.1   | SLC1A5    | 19 Homo sapiens M7V1; ATBO;    | 0.00015661                | 0.00079868 | 1.18753232 |            |
| ROBO3     | NM_0022370.2  | ROBO3     | 11 Homo sapiens HGPS; HGPPS    | 0.00579794                | 0.01299752 | 1.18721218 |            |
| RRAGA     | NM_006570.4   | RRAGA     | 9 Homo sapiens RAGA; FIP-1     | 6.27E-06                  | 8.13E-05   | 1.18602031 |            |
| NAT14     | NM_020378.2   | NAT14     | 19 Homo sapiens KLP1           | 0.00252029                | 0.00674811 | 1.18464956 |            |
| IL10RB    | NM_000628.3   | IL10RB    | 21 Homo sapiens IL-10R2; CRF2  | 0.00760253                | 0.0161344  | 1.18448088 |            |
| FOXC1     | NM_001453.1   | FOXC1     | 6 Homo sapiens FREAC3; FKHL    | 9.98E-07                  | 2.31E-05   | 1.18387726 |            |
| GNAI2     | NM_002070.2   | GNAI2     | 3 Homo sapiens H_LUCA16.1;     | 8.21E-05                  | 0.00050292 | 1.18367428 |            |
| LCOR      | NM_032440.1   | LCOR      | 10 Homo sapiens FLJ38026; MLI  | 0.0002336                 | 0.00107667 | 1.18303383 |            |
| CASP3     | NM_032991.2   | CASP3     | 4 Homo sapiens CPP32B; SCA-    | 0.02136892                | 0.03632683 | 1.18296617 |            |
| CLP1      | NM_006831.1   | CLP1      | 11 Homo sapiens HEAB; hClp1    | 0.00250766                | 0.00671925 | 1.18231104 |            |
| SSR1      | NM_003144.2   | SSR1      | 6 Homo sapiens DKFZp781N23     | 0.00017798                | 0.00088124 | 1.18210763 |            |
| ALG13     | NM_018466.2   | ALG13     | X                              | Homo sapiens YGL047W; GL  | 0.00281799 | 0.00737263 | 1.18198109 |
| GSTP1     | NM_000852.2   | GSTP1     | 11 Homo sapiens DFN7; GST3; I  | 1.07E-06                  | 2.42E-05   | 1.18180011 |            |
| CLTA      | NM_007096.1   | CLTA      | 9 Homo sapiens LCA             | 3.17E-05                  | 0.00025919 | 1.18151372 |            |
| TMEM49    | NM_030938.2   | TMEM49    | 17 Homo sapiens VMP1; DKFZP!   | 0.00019329                | 0.00093695 | 1.18138619 |            |
| METRNL    | NM_024042.2   | METRNL    | 16 Homo sapiens c380A1.2; MG   | 0.00457545                | 0.01079591 | 1.18130701 |            |
| SAT1      | NM_002970.1   | SAT1      | X                              | Homo sapiens KFSD; SSAT-1 | 5.09E-06   | 6.99E-05   | 1.18117249 |
| WDR54     | NM_032118.2   | WDR54     | 2 Homo sapiens FLJ12953        | 5.71E-05                  | 0.00039193 | 1.18002996 |            |
| CERK      | NM_182661.1   | CERK      | 22 Homo sapiens KIAA1646; dA   | 0.00050553                | 0.00194551 | 1.17961469 |            |
| SPATA2L   | NM_152339.2   | SPATA2L   | 16 Homo sapiens MGC26885; C    | 0.00020466                | 0.00097812 | 1.179572   |            |
| FAM117B   | NM_173511.2   | FAM117B   | 2 Homo sapiens FLJ38771; DK    | 0.00280086                | 0.00734549 | 1.17874259 |            |
| HINT2     | NM_032593.2   | HINT2     | 9 Homo sapiens HIT-17          | 0.00236646                | 0.00642808 | 1.17800371 |            |
| PALM      | NM_002579.1   | PALM      | 19 Homo sapiens KIAA0270       | 0.00722872                | 0.01548625 | 1.17782193 |            |
| LGALS1    | NM_002305.2   | LGALS1    | 22 Homo sapiens DKFZp686E23    | 5.93E-07                  | 1.65E-05   | 1.17763173 |            |
| TSC22D2   | NM_014779.2   | TSC22D2   | 3 Homo sapiens KIAA0669; TIL   | 0.00711162                | 0.01530174 | 1.17710771 |            |
| RNF20     | NM_019592.5   | RNF20     | 9 Homo sapiens BRE1A; MGC1     | 0.0001552                 | 0.00079299 | 1.17631833 |            |
| C17orf96  | NM_00113067.1 | C17orf96  | 17 Homo sapiens chromosome J   | 0.00061207                | 0.00226876 | 1.17600624 |            |
| ATOX1     | NM_004045.3   | ATOX1     | 5 Homo sapiens MGC138453; I    | 4.85E-05                  | 0.00035171 | 1.17595936 |            |
| TUBA4A    | NM_006000.1   | TUBA4A    | 2 Homo sapiens TUBA1; H2-AL    | 0.00057999                | 0.00217657 | 1.17580543 |            |
| SEC11C    | NM_033280.1   | SEC11C    | 18 Homo sapiens SPC21; SPCS4   | 4.04E-06                  | 6.01E-05   | 1.1753015  |            |
| PTPN1     | NM_002827.1   | PTPN1     | 20 Homo sapiens PTP1B          | 1.58E-05                  | 0.00015409 | 1.17482259 |            |
| ANKRD57   | NM_023016.2   | ANKRD57   | 2 Homo sapiens C2orf26         | 0.00118392                | 0.00376332 | 1.1740701  |            |
| RGS10     | NM_002925.3   | RGS10     | 10 Homo sapiens regulator of G | 0.00013361                | 0.00070796 | 1.17375202 |            |
| TMEM14B   | NM_030969.2   | TMEM14B   | 6 Homo sapiens MGC1223         | 0.00017457                | 0.00086828 | 1.17338367 |            |
| MGC61598  | XM_939432.1   | MGC61598  |                                | PREDICTED: Homo sapiens s | 0.00335086 | 0.0064221  | 1.17246327 |
| EDEM2     | NM_018217.1   | EDEM2     | 20 Homo sapiens FLJ10783; bA   | 0.01054575                | 0.02093356 | 1.17242651 |            |
| PCYOX1    | NM_016297.2   | PCYOX1    | 2 Homo sapiens KIAA0908; PC    | 0.00641467                | 0.0140866  | 1.17189988 |            |
| FAM120B   | NM_032448.1   | FAM120B   | 6 Homo sapiens KIAA1838; dJ    | 2.00E-05                  | 0.00018564 | 1.17189164 |            |
| ZNF252    | NR_023392.1   | ZNF252    | 8 Homo sapiens zinc finger pro | 0.00363052                | 0.00899807 | 1.17159981 |            |
| C17orf62  | NM_00103304.1 | C17orf62  | 17 Homo sapiens MGC4368; FLJ   | 0.02631085                | 0.04272319 | 1.171572   |            |
| STK4      | NM_006282.2   | STK4      | 20 Homo sapiens DKFZp686A20    | 5.13E-06                  | 7.04E-05   | 1.1700161  |            |
| SSTR2     | NM_001050.2   | SSTR2     | 17 Homo sapiens somatostatin r | 0.02141025                | 0.03638002 | 1.16982157 |            |
|           |               |           | 10 Homo sapiens cDNA: FLJ213   | 0.00339375                | 0.00850826 | 1.16927544 |            |
| PAFAH1B1  | NM_000430.2   | PAFAH1B1  | 17 Homo sapiens LIS2; PAFAH;   | 9.13E-05                  | 0.00054248 | 1.16923503 |            |
| CLIC4     | XM_938776.1   | CLIC4     | 1 Homo sapiens p64H1; CLIC4    | 0.00246427                | 0.00664228 | 1.16916346 |            |
| TRAPPC5   | NM_00104246   | TRAPPC5   | 19 Homo sapiens MGC52424       | 0.0006061                 | 0.00225354 | 1.16872045 |            |
| DMAP1     | NM_019100.3   | DMAP1     | 1 Homo sapiens FLJ11543; KIA   | 0.00065693                | 0.00238303 | 1.16832496 |            |
| UBL5      | NM_00104824   | UBL5      | 19 Homo sapiens HUB1; MGC13    | 1.30E-05                  | 0.00013337 | 1.1681496  |            |
| CACNB3    | NM_000725.2   | CACNB3    | 12 Homo sapiens CACNLB3        | 0.00012259                | 0.00066551 | 1.16785581 |            |
| SOX4      | NM_003107.2   | SOX4      | 6 Homo sapiens EVI16           | 0.00013356                | 0.00070805 | 1.16751254 |            |
| METRNL    | NM_00100443   | METRNL    |                                | PREDICTED: Homo sapiens n | 0.01363961 | 0.02558428 | 1.16702302 |
| SURF1     | NM_003172.2   | SURF1     | 9 Homo sapiens surfeit 1 (SUR  | 0.00179687                | 0.0052048  | 1.16639532 |            |
| PAPD5     | NM_022447.1   | PAPD5     | 16 Homo sapiens FLJ40270; TRI  | 0.00766849                | 0.016249   | 1.16628195 |            |
| LCMT1     | NM_00103239   | LCMT1     | 16 Homo sapiens LCMT; PPMT1;   | 0.00012087                | 0.00066077 | 1.16515032 |            |
| FKBP1A    | NM_000801.2   | FKBP1A    | 20 Homo sapiens PKCI2; FKBP1   | 0.00023035                | 0.00106756 | 1.16436533 |            |
| INO80C    | NM_194281.2   | INO80C    | 18 Homo sapiens hIes6; FLJ381  | 0.01557045                | 0.02838303 | 1.16434718 |            |
| IER5      | NM_016545.3   | IER5      | 1 Homo sapiens SBB148; MGC1    | 0.00179545                | 0.00520345 | 1.1632968  |            |
| KCNQ2     | NM_004518.2   | KCNQ2     | 20 Homo sapiens KVEBN1; KV7.   | 0.01420253                | 0.02643937 | 1.16303227 |            |
| ARHGEF10  | NM_014629.2   | ARHGEF10  | 8 Homo sapiens GEF10; DKFZ;    | 0.00017022                | 0.0008494  | 1.16293359 |            |
| ATP6V0B   | NM_004047.2   | ATP6V0B   | 1 Homo sapiens HATPL; ATP6F;   | 3.26E-05                  | 0.00026487 | 1.1627471  |            |
| LOC203547 | NM_00101798   | LOC203547 | X                              | Homo sapiens MGC131652; I | 0.00052479 | 0.00200261 | 1.16261813 |
| CA2       | NM_000067.1   | CA2       | 8 Homo sapiens Car2; CA-II; C  | 7.92E-05                  | 0.00049225 | 1.16244299 |            |
| ITGB1BP1  | NM_004763.2   | ITGB1BP1  | 2 Homo sapiens ICAP1B; ICAP-   | 0.00289306                | 0.00753457 | 1.16220537 |            |
| CANT1     | NM_138793.2   | CANT1     | 17 Homo sapiens SHAPY; SCAN-   | 0.0001233                 | 0.00066866 | 1.16195322 |            |

## 2.0 ACL-Independent Upreg

|           |                       |   |                                 |            |            |            |
|-----------|-----------------------|---|---------------------------------|------------|------------|------------|
| CDC2L6    | NM_015076.3 CDC2L6    |   | 6 Homo sapiens bA346C16.3; I    | 0.01207277 | 0.02327601 | 1.16178615 |
| KRT18P13  | XM_00172695 KRT18P13  |   | 9 PREDICTED: Homo sapiens k     | 0.00061261 | 0.00226997 | 1.16150811 |
| EHP1L1    | NM_00109940 EHP1L1    |   | 11 Homo sapiens FLJ35431; TA    | 0.00660911 | 0.0144581  | 1.16148959 |
| GALK1     | NM_000154.1 GALK1     |   | 17 Homo sapiens GALK; GK1       | 1.66E-05   | 0.00016112 | 1.16117741 |
| LEPROTL1  | NM_015344.1 LEPROTL1  |   | 8 Homo sapiens HSPC112; Vps     | 0.00097826 | 0.00323152 | 1.16102456 |
| MYO10     | NM_012334.1 MYO10     |   | 5 Homo sapiens KIAA0799; MC     | 0.01149604 | 0.02243472 | 1.16089548 |
| PEPD      | NM_000285.1 PEPD      |   | 19 Homo sapiens PROLIDASE; M    | 6.76E-05   | 0.00044177 | 1.16078476 |
| LRWD1     | NM_152892.1 LRWD1     |   | 7 Homo sapiens DKFZp434K18      | 0.00092542 | 0.00309651 | 1.16026896 |
| DLEU1     | NR_002605.1 DLEU1     |   | 13 Homo sapiens XTP6; MGC22     | 0.02291433 | 0.03836588 | 1.16038694 |
| SERINC2   | NM_178865.3 SERINC2   |   | 1 Homo sapiens TDE2; PRO08      | 0.02708069 | 0.04361484 | 1.15978773 |
| TMED3     | NM_007364.2 TMED3     |   | 15 Homo sapiens MGC133022; C    | 1.02E-05   | 0.00011258 | 1.15836041 |
| KLF2      | NM_016270.2 KLF2      |   | 19 Homo sapiens KLF             | 3.98E-06   | 5.98E-05   | 1.1579296  |
| RNF114    | NM_018683.3 RNF114    |   | 20 Homo sapiens RNF114          | 7.16E-05   | 0.00045782 | 1.15786938 |
| ZNHIT1    | NM_006349.2 ZNHIT1    |   | 7 Homo sapiens ZNFN4A1; CG      | 4.32E-05   | 0.00032439 | 1.15722569 |
| SDF2      | NM_006923.2 SDF2      |   | 17 Homo sapiens stromal cell-de | 0.00011642 | 0.00064326 | 1.15687778 |
| TRAPPC1   | NM_021210.2 TRAPPC1   |   | 17 Homo sapiens BET5; MUM2      | 0.00078285 | 0.00271562 | 1.15625919 |
| F11R      | NM_016946.3 F11R      |   | 1 Homo sapiens JAM; JAM-A; P    | 0.00394776 | 0.00960255 | 1.15624026 |
| IMPA2     | NM_014214.1 IMPA2     |   | 18 Homo sapiens inositol(myo)-  | 0.00450213 | 0.01066227 | 1.15606121 |
| ASNSD1    | NM_019048.1 ASNSD1    |   | 2 Homo sapiens NBLA00058; N     | 3.31E-05   | 0.00026692 | 1.15605968 |
| ASS1      | NM_000050.3 ASS1      |   | 9 Homo sapiens CTLN1; ASS       | 0.00059137 | 0.00220934 | 1.15532695 |
| CLTB      | NM_0001834.2 CLTB     |   | 5 Homo sapiens LCB              | 0.00010876 | 0.00061241 | 1.15532235 |
| HES6      | NM_018645.3 HES6      |   | 2 Homo sapiens hairy and enh    | 4.38E-05   | 0.0003277  | 1.1552902  |
| PIR       | NM_00101810 PIR       | X | Homo sapiens pirin (iron-bin    | 0.00020551 | 0.00098131 | 1.15525392 |
| TMC6      | NM_007267.5 TMC6      |   | 17 Homo sapiens LAK-4P; EVIN    | 0.0178449  | 0.03149373 | 1.15525368 |
| VAT1      | NM_006373.2 VAT1      |   | 17 Homo sapiens FLJ20230; VA    | 0.0002872  | 0.00125756 | 1.15452485 |
| NDUFA11   | NM_175614.2 NDUFA11   |   | 19 Homo sapiens B14.7           | 9.93E-05   | 0.00057604 | 1.15424893 |
| CHES1     | NM_005197.2 CHES1     |   | 14 Homo sapiens C14orf116; FC   | 0.00690505 | 0.01496392 | 1.15396101 |
| UBE3C     | NM_014671.1 UBE3C     |   | 7 Homo sapiens KIAA10; KIAA     | 0.00013212 | 0.00070318 | 1.15381442 |
| C21orf58  | NM_199071.2 C21ORF58  |   | 21 Homo sapiens chromosome 2    | 0.00767105 | 0.01625126 | 1.15333921 |
| ENDOD1    | XM_943182.1 ENDOD1    |   | 11 Homo sapiens MGC88092; Ki    | 0.02188665 | 0.03700437 | 1.15295701 |
|           | Hs.508682 HS.508682   |   | AV762101 MDS Homo sapien        | 1.09E-06   | 2.45E-05   | 1.15283051 |
| MAP2K1IP1 | NM_021970.2 MAP2K1IP1 |   | 4 Homo sapiens MP1              | 0.00234115 | 0.00637204 | 1.15260277 |
| MGST3     | NM_004528.2 MGST3     |   | 1 Homo sapiens GST-III          | 2.78E-06   | 4.64E-05   | 1.15191182 |
| BSG       | NM_001728.2 BSG       |   | 19 Homo sapiens EMMPRIN; OK     | 3.34E-05   | 0.00026866 | 1.15184689 |
| LOC648638 | XM_937706.1 LOC648638 |   | PREDICTED: Homo sapiens s       | 0.00019046 | 0.00092616 | 1.15080676 |
| GABARAPL2 | NM_007285.6 GABARAPL2 |   | 16 Homo sapiens GEF2; GATE1     | 0.0001404  | 0.00073359 | 1.15074478 |
| CD99      | NM_002414.3 CD99      | Y | Homo sapiens MIC2; MIC2Y;       | 0.01167466 | 0.02270989 | 1.15067132 |
| TSPAN5    | NM_005723.2 TSPAN5    |   | 4 Homo sapiens TSPAN-5; TM4     | 0.00147707 | 0.00448903 | 1.15047518 |
| SAP130    | NM_024545.2 SAP130    |   | 2 Homo sapiens FLJ12761         | 0.00206058 | 0.00577325 | 1.15047227 |
| IFI27L2   | NM_032036.2 IFI27L2   |   | 14 Homo sapiens TLH29; MGC4     | 0.00800496 | 0.01678849 | 1.15046296 |
| OGFR      | NM_007346.2 OGFR      |   | 20 Homo sapiens opioid growth   | 0.01353018 | 0.0254185  | 1.15036952 |
| NR4A2     | NM_006186.2 NR4A2     |   | 2 Homo sapiens RNR1; NOT; T     | 0.00593203 | 0.01324348 | 1.15026153 |
| LOC646723 | NM_199187.1 LOC646723 |   | 5 PREDICTED: Homo sapiens s     | 0.00019153 | 0.00093052 | 1.14996385 |
| ZFPM1     | NM_153813.1 ZFPM1     |   | 16 Homo sapiens FOG1; ZNF40     | 0.00269271 | 0.00712202 | 1.14978702 |
| H1FO      | NM_005318.2 H1FO      |   | 22 Homo sapiens H1FV; MGC52     | 7.59E-06   | 9.25E-05   | 1.14940894 |
| ARHGEF18  | NM_015318.2 ARHGEF18  |   | 19 Homo sapiens KIAA0521; MC    | 0.00030993 | 0.00133398 | 1.14932303 |
| TMEM54    | NM_033504.2 TMEM54    |   | 1 Homo sapiens BCLP; CAC1; I    | 0.00763891 | 0.01619581 | 1.1492294  |
| RHOC      | NM_175744.3 RHOC      |   | 1 Homo sapiens H9; ARHC; MC     | 1.60E-06   | 3.22E-05   | 1.14910157 |
| TUBB6     | XM_940079.1 TUBB6     |   | PREDICTED: Homo sapiens t       | 0.00204776 | 0.00575067 | 1.14903793 |
| CARHSP1   | NM_014316.1 CARHSP1   |   | 16 Homo sapiens CSCD1; MGC1     | 0.00086442 | 0.00293579 | 1.14859302 |
| CCDC24    | NM_152499.1 CCDC24    |   | 1 Homo sapiens RP5-1198O20.     | 0.00112901 | 0.00362699 | 1.14850503 |
| SH3GLB2   | NM_020145.2 SH3GLB2   |   | 9 Homo sapiens PP9455; PP65     | 2.76E-05   | 0.00023522 | 1.14846172 |
| MYH10     | NM_005964.1 MYH10     |   | 17 Homo sapiens NMMHCB; MG      | 4.00E-05   | 0.00030611 | 1.14774645 |
| SMUG1     | NM_014311.1 SMUG1     |   | 12 Homo sapiens UNG3; MGC10     | 0.0001897  | 0.00092367 | 1.14745462 |
| PLEKHA1   | NM_021622.3 PLEKHA1   |   | 10 Homo sapiens TAPP1           | 0.00049999 | 0.00193032 | 1.14734811 |
| HES4      | NM_021170.2 HES4      |   | 1 Homo sapiens hairy and enh    | 1.53E-05   | 0.00015135 | 1.14589616 |
| TMCO1     | NM_019026.2 TMCO1     |   | 1 Homo sapiens HP10122; TMC     | 1.26E-05   | 0.00013069 | 1.1458854  |
|           | Hs.213541 HS.213541   |   | 12 Homo sapiens cDNA FLJ3208    | 0.00118756 | 0.00377051 | 1.14573561 |
| HERC5     | NM_016323.1 HERC5     |   | 4 Homo sapiens CEBP1; CEB1      | 0.00720913 | 0.01545646 | 1.14560189 |
| PAPSS1    | NM_005443.4 PAPSS1    |   | 4 Homo sapiens SK1; PAPSS; J    | 0.00021238 | 0.00100661 | 1.14480871 |
| PRIC285   | NM_033405.2 PRIC285   |   | 20 Homo sapiens MGC138228; I    | 0.00384298 | 0.0094024  | 1.14460322 |
| SELS      | NM_203472.1 SELS      |   | 15 Homo sapiens SEPS1; ADO1     | 0.00103318 | 0.00338212 | 1.14455615 |
| ITGB1     | NM_002211.2 ITGB1     |   | 10 Homo sapiens GPIIA; VLAB;    | 3.83E-05   | 0.00029716 | 1.14404435 |
| LOC729843 | NM_012477.2 LOC729843 |   | 2 PREDICTED: Homo sapiens s     | 0.00042025 | 0.00169221 | 1.14390962 |
| PAIP2     | NM_00103311 PAIP2     |   | 5 Homo sapiens PAIP2A; MGC7     | 0.00013169 | 0.00070297 | 1.14370951 |
| GMD5      | NM_001500.2 GMD5      |   | 6 Homo sapiens GMD              | 6.66E-05   | 0.00043729 | 1.14369982 |
| CDH13     | NM_001257.3 CDH13     |   | 16 Homo sapiens CDHH            | 0.00851736 | 0.01765866 | 1.14368144 |
| DAD1      | NM_001344.1 DAD1      |   | 14 Homo sapiens OST2            | 1.18E-06   | 2.58E-05   | 1.14350416 |
| PJA2      | NM_014819.2 PJA2      |   | Homo sapiens KIAA0438; RN       | 0.00016341 | 0.00082412 | 1.14326844 |
| PERP      | NM_022121.2 PERP      |   | 6 Homo sapiens THW; RP3-49      | 9.74E-05   | 0.00056896 | 1.14319122 |

## 2.0 ACL-Independent Upreg

|            |             |             |    |              |                            |            |            |            |
|------------|-------------|-------------|----|--------------|----------------------------|------------|------------|------------|
| CHMP4B     | NM_176812.3 | CHMP4B      | 20 | Homo sapiens | CTPP3; SNF7;               | 0.01872579 | 0.03268217 | 1.14311376 |
| FAM64A     | NM_019013.1 | FAM64A      | 17 | Homo sapiens | FLJ10491; FLJ              | 0.00347738 | 0.00869386 | 1.14251783 |
| ACADVL     | NM_000018.2 | ACADVL      | 17 | Homo sapiens | ACAD6; VLCAI               | 0.00031256 | 0.00134318 | 1.14215139 |
| TM7SF3     | NM_016551.1 | TM7SF3      | 12 | Homo sapiens | transmembran               | 0.01971189 | 0.03405863 | 1.14151278 |
| ATP6V1B2   | NM_001693.2 | ATP6V1B2    | 8  | Homo sapiens | VATB; VPP3; A              | 1.89E-05   | 0.00017773 | 1.14017314 |
| ANKRD9     | NM_152326.2 | ANKRD9      | 14 | Homo sapiens | MGC21990                   | 0.01557757 | 0.02838649 | 1.13959402 |
| MRPL14     | NM_032111.2 | MRPL14      | 6  | Homo sapiens | MGC70566; RI               | 2.22E-05   | 0.00020048 | 1.13957484 |
| ATP6V0E1   | NM_003945.3 | ATP6V0E1    | 5  | Homo sapiens | Vma21p; ATP6               | 9.97E-05   | 0.00057752 | 1.13935653 |
| CMTM6      | NM_017801.2 | CMTM6       | 3  | Homo sapiens | FLJ20396; CKI              | 0.00067197 | 0.00242141 | 1.13928101 |
| IFI27L1    | NM_145249.2 | IFI27L1     | 14 | Homo sapiens | interferon, alp            | 0.00378801 | 0.00929932 | 1.13927713 |
| ATP6V0C    | NM_001694.2 | ATP6V0C     |    |              | PREDICTED: Homo sapiens A  | 8.62E-05   | 0.00052124 | 1.13908979 |
| ECGF1      | NM_001953.2 | ECGF1       | 22 | Homo sapiens | TP; PDECGF; t              | 0.00073272 | 0.00259049 | 1.13871392 |
| HSD17B4    | NM_000414.1 | HSD17B4     | 5  | Homo sapiens | MFE-2                      | 0.00070169 | 0.00250608 | 1.13856281 |
| ZMIZ1      | NM_020338.2 | ZMIZ1       | 10 | Homo sapiens | MIZ; Zimp10;               | 0.00080148 | 0.00276613 | 1.13825633 |
| LOC387791  | XR_037721.1 | LOC387791   |    |              | PREDICTED: Homo sapiens n  | 0.01357684 | 0.02547972 | 1.13788018 |
| LOC643336  | XM_00171856 | LOC643336   |    |              | PREDICTED: Homo sapiens s  | 0.00229206 | 0.00625881 | 1.13775866 |
| ANXA5      | NM_001154.2 | ANXA5       | 4  | Homo sapiens | PP4; ANX5; Ef              | 2.71E-06   | 4.54E-05   | 1.13774364 |
| MSRB2      | NM_012228.2 | MSRB2       | 10 | Homo sapiens | CBS-1; PILB; l             | 0.00227803 | 0.00622833 | 1.13754787 |
| TK1        | NM_003258.1 | TK1         |    |              | Homo sapiens TK2           | 4.93E-06   | 6.84E-05   | 1.13723719 |
| ZNF622     | NM_033414.2 | ZNF622      | 5  | Homo sapiens | MGC17552; ZI               | 0.00247434 | 0.00666116 | 1.13665283 |
| ADIPOR2    | NM_024551.2 | ADIPOR2     | 12 | Homo sapiens | MGC4640; ACI               | 4.99E-05   | 0.0003574  | 1.1366379  |
| SLC2A1     | NM_006516.1 | SLC2A1      | 1  | Homo sapiens | MGC141895; I               | 4.53E-06   | 6.50E-05   | 1.13620492 |
| EFR3A      | NM_015137.1 | EFR3A       | 8  | Homo sapiens | KIAA0143; DK               | 0.00028139 | 0.00123709 | 1.13614911 |
| GNS        | NM_002076.2 | GNS         | 12 | Homo sapiens | G6S; MGC212                | 5.17E-05   | 0.00036503 | 1.13573194 |
| PRKCA      | NM_002737.2 | PRKCA       | 17 | Homo sapiens | MGC129901; I               | 0.00697776 | 0.01506741 | 1.13512072 |
| C9orf46    | NM_018465.1 | C9ORF46     | 9  | Homo sapiens | FLJ39176; FLJ              | 0.00625177 | 0.013807   | 1.13488809 |
| LOC399748  | XR_018212.1 | LOC399748   |    |              | PREDICTED: Homo sapiens n  | 0.00017973 | 0.00088826 | 1.13475055 |
| WDR41      | NM_018268.2 | WDR41       | 5  | Homo sapiens | MSTP048; FLJ               | 0.00338902 | 0.00850227 | 1.13470863 |
| PITPNM1    | NM_004910.1 | PITPNM1     | 11 | Homo sapiens | NIR2; PITPNM               | 0.00073199 | 0.0025896  | 1.13445366 |
| PRDX1      | NM_181696.1 | PRDX1       | 1  | Homo sapiens | MSP23; PAG; l              | 3.07E-06   | 4.96E-05   | 1.13398854 |
| TMEM160    | NM_017854.1 | TMEM160     | 19 | Homo sapiens | FLJ20512                   | 0.00037799 | 0.00155371 | 1.13367783 |
| GPSM2      | NM_013296.3 | GPSM2       | 1  | Homo sapiens | Pins; LGN                  | 0.00422434 | 0.01009679 | 1.13276568 |
| MRPL40     | NM_003776.2 | MRPL40      | 22 | Homo sapiens | MLVCF; URIM;               | 0.00374319 | 0.009231   | 1.13275612 |
| NCBP2      | NM_007362.3 | NCBP2       | 3  | Homo sapiens | PIG55; CBP20               | 0.00012212 | 0.00066424 | 1.13239385 |
|            | Hs.57079    | HS.57079    | 10 | Homo sapiens | cDNA FLJ1326               | 0.00054683 | 0.00206711 | 1.1314287  |
| HIBADH     | NM_152740.2 | HIBADH      | 7  | Homo sapiens | MGC40361; N                | 0.0001661  | 0.00083493 | 1.13076647 |
| PQLC1      | NM_025078.3 | PQLC1       | 18 | Homo sapiens | FLJ22378                   | 0.00016474 | 0.00083042 | 1.1305664  |
| NT5DC2     | NM_022908.1 | NT5DC2      | 3  | Homo sapiens | FLJ12442                   | 0.00847668 | 0.01758438 | 1.13036029 |
| ASF1B      | NM_018154.2 | ASF1B       | 19 | Homo sapiens | FLJ10604; CIA              | 0.00070059 | 0.00250297 | 1.13031236 |
| EIF1B      | NM_005875.2 | EIF1B       | 3  | Homo sapiens | GC20                       | 0.00023255 | 0.00107366 | 1.13002701 |
| ECHDC2     | NM_018281.1 | ECHDC2      | 1  | Homo sapiens | FLJ10948                   | 0.00399952 | 0.00968294 | 1.12998996 |
| EIF4E2     | NM_004846.2 | EIF4E2      | 2  | Homo sapiens | EIF4EL3; 4E-L              | 0.00699808 | 0.01510229 | 1.12969018 |
| TRAPPC3    | NM_014408.3 | TRAPPC3     | 1  | Homo sapiens | BET3                       | 0.0003526  | 0.00147728 | 1.12892447 |
| MAN2B2     | NM_015274.1 | MAN2B2      | 4  | Homo sapiens | KIAA0935                   | 0.00181109 | 0.00523761 | 1.1289174  |
| LOC346887  | XM_943533.1 | LOC346887   |    |              | PREDICTED: Homo sapiens s  | 0.00112132 | 0.00306053 | 1.12886999 |
| PIN1       | NM_006221.2 | PIN1        | 19 | Homo sapiens | UBL5; DOD                  | 5.15E-05   | 0.00036428 | 1.12880269 |
| SH3BP4     | NM_014521.1 | SH3BP4      | 2  | Homo sapiens | BOG25; TTP                 | 0.00247955 | 0.00667023 | 1.12844563 |
| CDR2L      | NM_014603.1 | CDR2L       | 17 | Homo sapiens | HUMPPA                     | 0.00027955 | 0.0012325  | 1.12766198 |
| FOS        | NM_005252.2 | FOS         | 14 | Homo sapiens | c-fos                      | 6.20E-05   | 0.00041343 | 1.12732852 |
| CHD7       | NM_017780.2 | CHD7        | 8  | Homo sapiens | FLJ20361; KIA              | 0.00566734 | 0.01274947 | 1.12721251 |
| SEC13      | NM_00113623 | SEC13       | 3  | Homo sapiens | SEC13 homolog              | 0.00055598 | 0.00209733 | 1.12714291 |
| PTRF       | NM_012232.2 | PTRF        | 17 | Homo sapiens | FKSG13                     | 0.00011371 | 0.00063243 | 1.12671291 |
| CYB5R3     | NM_007326.2 | CYB5R3      | 22 | Homo sapiens | DIA1; B5R                  | 3.85E-05   | 0.00029849 | 1.12669692 |
| FLJ40504   | NM_173624.1 | FLJ40504    | 17 | Homo sapiens | MGC138233; I               | 7.07E-06   | 8.84E-05   | 1.12597771 |
| UBE2N      | NM_003348.3 | UBE2N       | 12 | Homo sapiens | MGC8489; MG                | 0.00051203 | 0.00196427 | 1.12597194 |
| SNF8       | NM_007241.2 | SNF8        | 17 | Homo sapiens | VPS22; EAP30               | 0.00695908 | 0.01503902 | 1.12563073 |
| LOC642489  | XM_925989.1 | LOC642489   |    |              | PREDICTED: Homo sapiens s  | 9.63E-05   | 0.0005638  | 1.12545034 |
| APRT       | NM_000485.2 | APRT        | 16 | Homo sapiens | MGC125857; J               | 0.00023732 | 0.00108691 | 1.12512352 |
| JUP        | NM_021991.1 | JUP         | 17 | Homo sapiens | PKGB; CTNNG                | 0.00216183 | 0.00597982 | 1.12372822 |
| C20orf111  | NM_016470.6 | C20ORF111   | 20 | Homo sapiens | dJ1183I21.1;               | 0.00144576 | 0.00441238 | 1.12340506 |
| SGCE       | NM_003919.1 | SGCE        | 7  | Homo sapiens | DYT11; ESG                 | 0.00713921 | 0.01534591 | 1.12327039 |
| GTF2H5     | NM_207118.1 | GTF2H5      | 6  | Homo sapiens | C6orf175; TTC              | 3.59E-05   | 0.00028384 | 1.12253468 |
| LYRM1      | NM_020424.2 | LYRM1       | 16 | Homo sapiens | A211C6.1                   | 7.83E-05   | 0.00048878 | 1.12211593 |
| LLPH       | NM_032338.3 | LLPH        | 12 | Homo sapiens | LLP homolog,               | 0.00070456 | 0.00251302 | 1.12120126 |
| GMFB       | NM_004124.2 | GMFB        | 14 | Homo sapiens | GMF                        | 0.00120662 | 0.0038154  | 1.12107194 |
| LOC653506  | XM_927769.1 | LOC653506   |    |              | PREDICTED: Homo sapiens s  | 0.00057894 | 0.00217413 | 1.1210077  |
| DHX40      | XM_942276.1 | DHX40       |    |              | PREDICTED: Homo sapiens C  | 0.00755029 | 0.01604233 | 1.12097422 |
| LITAF      | NM_004862.2 | LITAF       | 16 | Homo sapiens | MGC125274; I               | 6.59E-05   | 0.00043444 | 1.12048926 |
| UBR4       | NM_020765.1 | UBR4        | 1  | Homo sapiens | KIAA1307; FL               | 0.0006607  | 0.0023927  | 1.11968915 |
| LOC1000858 | NR_003286.1 | LOC10008588 |    |              | Homo sapiens 18S ribosomal | 2.02E-05   | 0.00018663 | 1.11881959 |

## 2.0 ACL-Independent Upreg

|             |             |             |    |              |                             |            |            |            |
|-------------|-------------|-------------|----|--------------|-----------------------------|------------|------------|------------|
| COMMD6      | NM_203497.1 | COMMD6      | 13 | Homo sapiens | Acrg                        | 1.90E-05   | 0.00017834 | 1.11850908 |
| SNHG9       | NR_003142.2 | SNHG9       | 16 | Homo sapiens | DKFZp686N06                 | 7.54E-05   | 0.00047552 | 1.11839396 |
| MIF4GD      | NM_020679.2 | MIF4GD      | 17 | Homo sapiens | SLIP1; MIFD;                | 0.01903971 | 0.03313428 | 1.11829092 |
| ARHGEF3     | NM_019555.1 | ARHGEF3     | 3  | Homo sapiens | DKFZP434F24                 | 0.00310528 | 0.00794263 | 1.11822554 |
| FBXO21      | NM_033624.2 | FBXO21      | 12 | Homo sapiens | FBX21; MGC21                | 0.01795364 | 0.03165994 | 1.11743389 |
| PPP1CB      | NM_206876.1 | PPP1CB      | 2  | Homo sapiens | PP-1B; PPP1C                | 0.02962437 | 0.04666729 | 1.11721081 |
| GNA11       | NM_002067.1 | GNA11       | 19 | Homo sapiens | GNA-11                      | 0.00466184 | 0.0109451  | 1.11719918 |
| TUBB2C      | NM_006088.5 | TUBB2C      | 9  | Homo sapiens | TUBB2                       | 2.99E-05   | 0.0002485  | 1.11668987 |
| TUBB3       | NM_006086.2 | TUBB3       | 16 | Homo sapiens | TUBB4; MC1R                 | 6.57E-05   | 0.0004337  | 1.11614403 |
| SLC4A2      | NM_003040.2 | SLC4A2      | 7  | Homo sapiens | HKB3; NBND3                 | 0.00738003 | 0.0157576  | 1.11559276 |
| SCARB2      | NM_005506.2 | SCARB2      | 4  | Homo sapiens | CD36L2; HLG                 | 0.00023544 | 0.00108149 | 1.11530422 |
| PCMT1       | NM_005389.1 | PCMT1       | 6  | Homo sapiens | protein-L-isoa              | 1.19E-05   | 0.0001247  | 1.11493833 |
| EHD1        | NM_006795.2 | EHD1        | 11 | Homo sapiens | PAST1; PAST;                | 0.01140281 | 0.02227678 | 1.11449859 |
| C7orf50     | NM_032350.3 | C7ORF50     | 7  | Homo sapiens | MGC11257; Y                 | 0.00016901 | 0.00084487 | 1.11419985 |
| LOC10013356 | XM_00172454 | LOC10013356 |    |              | PREDICTED: Homo sapiens s   | 0.00024473 | 0.00111286 | 1.11394147 |
| CENPE       | NM_006183.2 | CENPE       | 4  | Homo sapiens | KIF10                       | 0.01076426 | 0.02127792 | 1.11380997 |
| ARL2        | NM_001667.1 | ARL2        | 11 | Homo sapiens | ARFL2                       | 0.00094928 | 0.00315788 | 1.11347778 |
| SREBF1      | NM_004176.3 | SREBF1      | 17 | Homo sapiens | SREBP1                      | 0.00794693 | 0.01669578 | 1.11345568 |
| MRLC2       | NM_033546.2 | MRLC2       | 18 | Homo sapiens | MLC-B                       | 1.11E-05   | 0.00011961 | 1.1133582  |
| DYNLRB1     | NM_014183.2 | DYNLRB1     | 20 | Homo sapiens | BLP; ROBLD1;                | 0.00098733 | 0.00325554 | 1.11275688 |
| LOC648390   | XR_037845.1 | LOC648390   |    |              | PREDICTED: Homo sapiens n   | 0.00029677 | 0.00128753 | 1.11272196 |
| NCOA4       | NM_005437.1 | NCOA4       | 10 | Homo sapiens | RFG; ARA70; l               | 0.00017512 | 0.00086982 | 1.11181972 |
| CHMP1A      | NM_002768.1 | CHMP1A      | 16 | Homo sapiens | CHMP1A; CHM                 | 0.00320844 | 0.00815276 | 1.11127757 |
| GCAT        | NM_014291.2 | GCAT        | 22 | Homo sapiens | MGC23053; KI                | 0.00047005 | 0.00183826 | 1.11081643 |
| HSBP1       | NM_001537.2 | HSBP1       | 16 | Homo sapiens | DKFZp686D16                 | 0.00018834 | 0.00091745 | 1.11009565 |
| LOC644743   | XM_945181.1 | LOC644743   |    |              | PREDICTED: Homo sapiens h   | 3.79E-05   | 0.00029522 | 1.10983916 |
| GLO1        | NM_006708.1 | GLO1        | 6  | Homo sapiens | GLYI; GLOD1                 | 4.94E-05   | 0.00035468 | 1.10957503 |
| KRT8        | NM_002273.2 | KRT8        | 12 | Homo sapiens | CYK8; KO; K8                | 0.0006213  | 0.00228893 | 1.10952443 |
| C21orf24    | NM_00100178 | C21ORF24    | 21 | Homo sapiens | chromosome 2                | 0.00096983 | 0.00320854 | 1.10922791 |
| GAMT        | NM_138924.1 | GAMT        | 19 | Homo sapiens | TP53I2; PIG2                | 0.00173425 | 0.00507889 | 1.10918851 |
| RAP1GAP     | NM_002885.1 | RAP1GAP     | 1  | Homo sapiens | KIAA0474; Ra                | 0.01476572 | 0.02722665 | 1.10869231 |
| HMG20B      | NM_006339.1 | HMG20B      | 19 | Homo sapiens | SMARCE1r; FL                | 0.00029336 | 0.00127528 | 1.10839944 |
| NBL1        | NM_182744.1 | NBL1        | 1  | Homo sapiens | D1S1733E; NC                | 0.00050403 | 0.00194246 | 1.10821403 |
| UBE1        | NM_153280.1 | UBE1        |    |              | Homo sapiens UBA1A; A1S9;   | 0.00205693 | 0.00576746 | 1.10790738 |
| TST         | NM_003312.4 | TST         | 22 | Homo sapiens | MGC19578; R                 | 0.00014549 | 0.00075652 | 1.10765819 |
| TALDO1      | XM_938697.1 | TALDO1      |    |              | PREDICTED: Homo sapiens ti  | 9.40E-05   | 0.00055404 | 1.10763626 |
| SOX9        | NM_000346.2 | SOX9        | 17 | Homo sapiens | CMPD1; CMD1                 | 0.00087936 | 0.00296891 | 1.10715419 |
| RPA3        | NM_002947.3 | RPA3        | 7  | Homo sapiens | REPA3                       | 0.00027642 | 0.00122168 | 1.105592   |
| CCND1       | NM_053056.1 | CCND1       | 11 | Homo sapiens | PRAD1; D11S;                | 5.09E-05   | 0.00036167 | 1.10465962 |
| CHMP5       | NM_016410.2 | CHMP5       | 9  | Homo sapiens | C9orf83; SNF7               | 0.00022362 | 0.00104529 | 1.10458323 |
| MGC71993    | NM_00100433 | MGC71993    |    |              | Homo sapiens similar to DNA | 0.00129577 | 0.00403622 | 1.10404461 |
| FAM104A     | NM_032837.1 | FAM104A     | 17 | Homo sapiens | FLJ14775                    | 0.00101921 | 0.00334546 | 1.10397839 |
| HEXB        | NM_000521.2 | HEXB        | 5  | Homo sapiens | ENC-1AS                     | 9.23E-05   | 0.00054659 | 1.10299323 |
| CTNBL1      | NM_030877.3 | CTNBL1      | 20 | Homo sapiens | C20orf33; NAF               | 0.0061261  | 0.01359299 | 1.10274245 |
| HMGB3       | NM_005342.2 | HMGB3       |    |              | Homo sapiens MGC90319; H    | 0.01437905 | 0.02668116 | 1.10255412 |
| GUSB        | NM_000181.1 | GUSB        | 7  | Homo sapiens | MPS7; FLJ394                | 0.01508944 | 0.02767332 | 1.10193542 |
| AP1M1       | NM_032493.2 | AP1M1       | 19 | Homo sapiens | MU-1A; CLAP                 | 0.00277812 | 0.00730702 | 1.10173593 |
| C17orf61    | NM_152766.2 | C17ORF61    | 17 | Homo sapiens | MGC40107                    | 5.93E-05   | 0.00040059 | 1.10109429 |
| MAN1B1      | NM_016219.2 | MAN1B1      | 9  | Homo sapiens | MANA-ER                     | 0.00742117 | 0.01582988 | 1.10107754 |
| RAB26       | NM_014353.4 | RAB26       | 16 | Homo sapiens | V46133                      | 0.00749892 | 0.01595503 | 1.10041738 |
| CALR        | NM_004343.2 | CALR        | 19 | Homo sapiens | FLJ26680; cC1               | 0.00245167 | 0.00661489 | 1.10005082 |
| CAPZA2      | NM_006136.2 | CAPZA2      | 7  | Homo sapiens | CAPZ; CAPP                  | 0.00076054 | 0.00265943 | 1.099826   |
| TOMM20      | NM_014765.2 | TOMM20      | 1  | Homo sapiens | translocase of              | 0.00023753 | 0.00108695 | 1.09958195 |
| RNASEK      | NM_00100433 | RNASEK      | 17 | Homo sapiens | MGC71993                    | 0.0005845  | 0.00218743 | 1.0995481  |
| COX6A1      | NM_004373.2 | COX6A1      | 12 | Homo sapiens | COX6AL; COX                 | 0.00030921 | 0.00133143 | 1.09952378 |
| PRCP        | NM_005040.2 | PRCP        | 11 | Homo sapiens | HUMPCP; PCP;                | 0.00019283 | 0.00093557 | 1.09862052 |
| TBCB        | NM_001281.2 | TBCB        | 19 | Homo sapiens | CG22; MGC14                 | 0.00128235 | 0.00400478 | 1.09799134 |
| TMEM66      | NM_016127.4 | TMEM66      | 8  | Homo sapiens | FLJ22274; FO                | 0.00019392 | 0.00093919 | 1.09673776 |
| BLVRB       | NM_000713.1 | BLVRB       |    |              | Homo sapiens BVRB; MGC11    | 0.02923122 | 0.04623562 | 1.09670248 |
| TMEM59      | NM_004872.3 | TMEM59      | 1  | Homo sapiens | FLJ42977; C1                | 0.0013039  | 0.00405457 | 1.09635372 |
| DYNC1H1     | NM_001376.2 | DYNC1H1     | 14 | Homo sapiens | DNECL; DNCH                 | 0.00088783 | 0.00299285 | 1.0961894  |
| LOC374395   | NM_199337.1 | LOC374395   |    |              | Homo sapiens similar to RIK | 0.00020995 | 0.00099858 | 1.09592365 |
| SIVA1       | NM_021709.2 | SIVA1       | 14 | Homo sapiens | SIVA; CD27BP                | 0.00011219 | 0.00062689 | 1.09504844 |
| ADRM1       | NM_175573.1 | ADRM1       | 20 | Homo sapiens | Rpn13; GP11                 | 0.00029802 | 0.00129192 | 1.09503706 |
| APEH        | NM_001640.3 | APEH        | 3  | Homo sapiens | D3S48E; APH;                | 0.00058675 | 0.00219434 | 1.0947027  |
| LOC401115   | XM_937968.1 | LOC401115   |    |              | PREDICTED: Homo sapiens h   | 5.13E-05   | 0.00036378 | 1.09447772 |
| AMZ2        | NM_016627.4 | AMZ2        | 17 | Homo sapiens | archaelysin fa              | 0.00148398 | 0.00450751 | 1.09441215 |
| RING1       | NM_002931.3 | RING1       | 6  | Homo sapiens | RNF1                        | 4.89E-05   | 0.00035234 | 1.09421485 |
| SERPINE2    | NM_006216.2 | SERPINE2    | 2  | Homo sapiens | PI7; GDN; PN                | 3.88E-05   | 0.00030035 | 1.09400396 |
| COPB2       | NM_004766.1 | COPB2       | 3  | Homo sapiens | beta'-COP                   | 0.00353049 | 0.0088003  | 1.09392939 |



## 2.0 ACL-Independent Upreg

|           |             |           |    |                              |            |            |            |
|-----------|-------------|-----------|----|------------------------------|------------|------------|------------|
| LOC643384 | XR_016363.2 | LOC643384 | 4  | PREDICTED: Homo sapiens h    | 0.02380998 | 0.0395668  | 1.0934836  |
| MAD2L2    | NM_006341.2 | MAD2L2    | 1  | Homo sapiens REV7; MAD2B     | 0.00022446 | 0.00104831 | 1.09256864 |
| NOSIP     | NM_015953.3 | NOSIP     | 19 | Homo sapiens CGI-25          | 4.58E-05   | 0.00033804 | 1.09252003 |
| COMMD3    | NM_012071.2 | COMMD3    | 10 | Homo sapiens C10orf8; DKFz   | 0.00048356 | 0.00187689 | 1.09243197 |
| GYG1      | NM_004130.2 | GYG1      | 3  | Homo sapiens GYG             | 0.00325087 | 0.00822979 | 1.09207143 |
| MGC40489  | XM_935208.1 | MGC40489  | 17 | PREDICTED: Homo sapiens h    | 0.02277362 | 0.03815968 | 1.09155475 |
| AIF1L     | NM_031426.2 | AIF1L     | 9  | Homo sapiens MGC29466; FI    | 0.00040509 | 0.00164089 | 1.09120209 |
| RPS4Y1    | NM_001008.3 | RPS4Y1    | Y  | Homo sapiens RPS4Y; MGC1:    | 0.00083748 | 0.00286219 | 1.09106901 |
| UBB       | NM_018955.2 | UBB       | 17 | Homo sapiens FLJ25987; MG    | 0.00205884 | 0.00577135 | 1.09088861 |
| HLA-A     | NM_002116.5 | HLA-A     | 6  | Homo sapiens major histocor  | 3.14E-05   | 0.00025723 | 1.09078742 |
| SDHAF2    | NM_017841.1 | SDHAF2    | 11 | Homo sapiens FLJ20487        | 0.00233223 | 0.00635095 | 1.09069116 |
| RAB10     | NM_016131.2 | RAB10     | 2  | Homo sapiens RAB10; memb     | 0.00035749 | 0.00149201 | 1.09065941 |
| CENPB     | NM_001810.5 | CENPB     | 20 | Homo sapiens centromere pr   | 0.01861233 | 0.03252594 | 1.0906379  |
| ATP5D     | NM_001687.4 | ATP5D     | 19 | Homo sapiens ATP synthase,   | 0.00146677 | 0.00446273 | 1.09061038 |
| CYCSL1    | NR_001561.1 | CYCSL1    | 6  | Homo sapiens HS11; bA513I    | 0.00092306 | 0.00309243 | 1.09029625 |
| LOC642934 | XM_931177.1 | LOC642934 |    | PREDICTED: Homo sapiens h    | 0.02245801 | 0.03775308 | 1.09023253 |
| YTHDF1    | NM_017798.2 | YTHDF1    | 20 | Homo sapiens C20orf21; FLJ   | 0.01085332 | 0.0214189  | 1.09022014 |
| SLC35B2   | NM_178148.1 | SLC35B2   | 6  | Homo sapiens UGTrel4; SLL;   | 0.00698467 | 0.01507935 | 1.09011636 |
| NDUFB3    | NM_002491.1 | NDUFB3    | 2  | Homo sapiens B12             | 6.90E-05   | 0.00044649 | 1.09009229 |
| C1orf41   | NM_016126.1 | C1ORF41   | 1  | Homo sapiens HSPCO34; PP2    | 0.02380006 | 0.03955636 | 1.08983202 |
| RHOQ      | NM_012249.2 | RHOQ      | 2  | Homo sapiens ARHQ; RASL7/    | 0.01712888 | 0.03052248 | 1.08946984 |
| NXN       | NM_022463.3 | NXN       | 17 | Homo sapiens TRG-4; FLJ12/   | 0.00455779 | 0.01076126 | 1.08853867 |
| GTF2A2    | NM_004492.1 | GTF2A2    | 15 | Homo sapiens TF2A2; HsT18    | 0.00026291 | 0.00117245 | 1.08818099 |
| UNC84B    | NM_015374.1 | UNC84B    | 22 | Homo sapiens KIAA0668; MC    | 0.00279365 | 0.00733014 | 1.08746864 |
| POMP      | NM_015932.2 | POMP      | 13 | Homo sapiens UMP1; HSPCO:    | 0.00085504 | 0.00291122 | 1.08728415 |
| GPT2      | NM_133443.1 | GPT2      | 16 | Homo sapiens ALT2            | 0.01312483 | 0.02482003 | 1.08708639 |
| CALM3     | NM_005184.2 | CALM3     | 19 | Homo sapiens PHKD; PHKD3     | 8.10E-05   | 0.0004987  | 1.08695011 |
| CAPZB     | NM_004930.2 | CAPZB     | 1  | Homo sapiens CAPB; MGC10:    | 0.00750705 | 0.01596919 | 1.08674283 |
| TCEB2     | NM_007108.2 | TCEB2     | 16 | Homo sapiens SIII            | 0.00029165 | 0.00126991 | 1.08667259 |
| OCIAD2    | NM_152398.2 | OCIAD2    | 4  | Homo sapiens DKFZp686C03     | 0.00094073 | 0.00313326 | 1.08647946 |
| VKORC1    | NM_024006.4 | VKORC1    | 16 | Homo sapiens MST134; EDTF    | 0.00049176 | 0.00190533 | 1.08636043 |
| PTP4A2    | XM_944909.1 | PTP4A2    |    | PREDICTED: Homo sapiens p    | 0.00292787 | 0.00761246 | 1.08620914 |
| LAMP1     | NM_005561.2 | LAMP1     | 13 | Homo sapiens LCP120; LAMP    | 0.00016292 | 0.00082238 | 1.08608652 |
| TMEM106C  | NM_024056.2 | TMEM106C  | 12 | Homo sapiens MGC5576; MG     | 0.00078934 | 0.00273202 | 1.08535716 |
| KPNA2     | XM_930156.1 | KPNA2     | 17 | Homo sapiens RCH1; IPOA1;    | 0.00529516 | 0.01208479 | 1.08491053 |
| PSMD1     | NM_002807.2 | PSMD1     | 2  | Homo sapiens S1; MGC1330:    | 0.00180279 | 0.005215   | 1.08377217 |
| COX6C     | NM_004374.2 | COX6C     | 8  | Homo sapiens cytochrome c    | 0.00358218 | 0.00890057 | 1.08374247 |
| CDC37     | NM_007065.3 | CDC37     | 19 | Homo sapiens P50CDC37        | 0.00021942 | 0.00103052 | 1.08370578 |
| LDLR      | NM_000527.2 | LDLR      | 19 | Homo sapiens FHC; FH         | 0.00049851 | 0.00192599 | 1.08301626 |
| FAM46A    | NM_017633.1 | FAM46A    | 6  | Homo sapiens XTP11; C6orf3   | 0.00870381 | 0.01796638 | 1.08238008 |
| CCDC130   | NM_030818.2 | CCDC130   | 19 | Homo sapiens MGC10471        | 0.00573305 | 0.01287597 | 1.08234288 |
| TXNDC12   | NM_015913.2 | TXNDC12   | 1  | Homo sapiens AGR1; ERP19;    | 0.00117456 | 0.00374235 | 1.08222321 |
| FAM83D    | NM_030919.1 | FAM83D    | 20 | Homo sapiens C20orf129; FL   | 0.01344445 | 0.02530556 | 1.08213893 |
| LOC644914 | XM_00112855 | LOC644914 |    | PREDICTED: Homo sapiens s    | 0.00124346 | 0.00390011 | 1.08205161 |
| LMTK3     | XM_936372.1 | LMTK3     |    | PREDICTED: Homo sapiens k    | 0.00061694 | 0.00227747 | 1.08132563 |
| CISD1     | NM_018464.2 | CISD1     | 10 | Homo sapiens C10orf70; MD:   | 0.00118102 | 0.00375522 | 1.0798685  |
| ANXA2P1   | NR_001562.1 | ANXA2P1   | 4  | Homo sapiens LPC2A; ANX2L    | 0.00056239 | 0.00211783 | 1.07982167 |
| PPP2R2A   | NM_002717.2 | PPP2R2A   | 8  | Homo sapiens MGC52248; FI    | 0.01517886 | 0.02779041 | 1.07965765 |
| CFD       | NM_001928.2 | CFD       | 19 | Homo sapiens DF; ADN; PFD    | 0.00051581 | 0.00197388 | 1.07837273 |
| C16orf58  | NM_022744.1 | C16ORF58  | 16 | Homo sapiens FLJ13868        | 0.01307108 | 0.0247442  | 1.07752048 |
| LOC124512 | XM_940962.1 | LOC124512 |    | PREDICTED: Homo sapiens h    | 0.00306887 | 0.00787171 | 1.07730712 |
| NDUFA4    | NM_002489.2 | NDUFA4    | 7  | Homo sapiens FLJ27440; MG    | 0.00044288 | 0.00175663 | 1.07696064 |
| SF3B14    | NM_016047.3 | SF3B14    | 2  | Homo sapiens Ht006; SF3B1:   | 0.00122085 | 0.00384697 | 1.07658743 |
| PDXK      | NM_003681.3 | PDXK      | 21 | Homo sapiens PKH; MGC523:    | 0.01636112 | 0.02951737 | 1.07649174 |
| MLEC      | NM_014730.2 | MLEC      | 12 | Homo sapiens malectin (MLE   | 0.00336038 | 0.00844407 | 1.07596231 |
| COX4I1    | NM_001861.2 | COX4I1    | 16 | Homo sapiens MGC72016; C:    | 0.00064223 | 0.00234849 | 1.07557995 |
| TERF2     | NM_005652.2 | TERF2     | 16 | Homo sapiens TRBF2; TRF2     | 0.01879481 | 0.03278157 | 1.07530157 |
| SAMM50    | NM_015380.3 | SAMM50    | 22 | Homo sapiens OMP85; TOB5:    | 0.00953613 | 0.01933557 | 1.07517915 |
| CCNI      | NM_006835.2 | CCNI      | 4  | Homo sapiens CYC1; CYI       | 0.00053246 | 0.00202619 | 1.07515218 |
| TYK2      | NM_003331.3 | TYK2      | 19 | Homo sapiens JTK1            | 0.02979995 | 0.04687594 | 1.07431628 |
| NUCB1     | NM_006184.3 | NUCB1     | 19 | Homo sapiens DKFZp686A15     | 0.00292836 | 0.00761192 | 1.0731799  |
| CNN3      | NM_001839.2 | CNN3      | 1  | Homo sapiens calponin 3, aci | 0.00396392 | 0.00962895 | 1.07301083 |
| MGEA5     | NM_012215.1 | MGEA5     | 10 | Homo sapiens MEA5; FLJ233    | 0.00250929 | 0.00672196 | 1.07251388 |
| LOC440926 | NR_002315.1 | LOC440926 |    | Homo sapiens H3 histone, fa  | 0.00818028 | 0.01710994 | 1.07231477 |
| EDF1      | NM_003792.2 | EDF1      | 9  | Homo sapiens EDF-1; MBF1;    | 0.00162643 | 0.00483613 | 1.071926   |
| MRPL33    | NM_004891.2 | MRPL33    | 2  | Homo sapiens C2orf1; RPL33   | 0.00067435 | 0.00242836 | 1.07026884 |
| TIPARP    | NM_015508.2 | TIPARP    | 3  | Homo sapiens PARP-7; PARP:   | 0.02432945 | 0.04023318 | 1.06904664 |
| RPS23     | NM_001025.4 | RPS23     | 5  | Homo sapiens FLJ35016        | 0.01944897 | 0.03371155 | 1.06874925 |
| SLC44A1   | NM_080546.2 | SLC44A1   | 9  | Homo sapiens RP11-287A8.1    | 0.02228701 | 0.0375411  | 1.06849487 |
| PSMB1     | NM_002793.2 | PSMB1     | 6  | Homo sapiens FLJ25321; KIA   | 0.02137031 | 0.03632352 | 1.06806618 |

## 2.0 ACL-Independent Upreg

|            |             |            |    |                              |            |            |            |
|------------|-------------|------------|----|------------------------------|------------|------------|------------|
| MARCKSL1   | NM_023009.4 | MARCKSL1   | 1  | Homo sapiens F52; MACMAR     | 0.00567416 | 0.01276217 | 1.06804815 |
| C19orf22   | NM_138774.2 | C19ORF22   | 19 | Homo sapiens MGC16353        | 0.03123889 | 0.04855611 | 1.06797541 |
| LOC729279  | XR_039753.1 | LOC729279  |    | PREDICTED: Homo sapiens n    | 0.01122415 | 0.021991   | 1.06761798 |
| DENR       | NM_003677.3 | DENR       | 12 | Homo sapiens DRP; DRP1; S    | 0.00768925 | 0.01627078 | 1.06743582 |
| TXNDC17    | NM_032731.2 | TXNDC17    | 17 | Homo sapiens TRP14; MGC14    | 0.00038788 | 0.00158418 | 1.06646262 |
| DNAJB6     | NM_005494.2 | DNAJB6     | 7  | Homo sapiens DKFZp566D08     | 0.02081365 | 0.03557207 | 1.06564079 |
| PRDX4      | NM_006406.1 | PRDX4      |    | Homo sapiens PRX-4; AOE37    | 0.00797177 | 0.01673178 | 1.06449293 |
| DCXR       | NM_016286.2 | DCXR       | 17 | Homo sapiens P34H; HCRII;    | 0.00587733 | 0.01314568 | 1.06420788 |
| LOC730288  | XM_00112627 | LOC730288  | 7  | PREDICTED: Homo sapiens s    | 0.00405702 | 0.00978076 | 1.06351234 |
| LTA4H      | NM_000895.1 | LTA4H      | 12 | Homo sapiens leukotriene A4  | 0.01050981 | 0.02088129 | 1.06265    |
| SNX3       | NM_152828.2 | SNX3       | 6  | Homo sapiens SDP3; MGC17     | 0.00209188 | 0.00583088 | 1.06221951 |
| RPL11      | NM_000975.2 | RPL11      | 1  | Homo sapiens GIG34           | 0.00293562 | 0.00662348 | 1.06138031 |
| ACTN4      | NM_004924.3 | ACTN4      | 19 | Homo sapiens DKFZp686K23     | 0.02093285 | 0.03573084 | 1.06096883 |
| RAC1       | NM_198829.1 | RAC1       | 7  | Homo sapiens MGC111543; I    | 0.01089363 | 0.02147896 | 1.06010718 |
| FLJ35390   | NR_024416.1 | FLJ35390   | 7  | Homo sapiens hypothetical L  | 0.0283122  | 0.04515659 | 1.06006962 |
| GLG1       | NM_012201.4 | GLG1       | 16 | Homo sapiens GFR-1; FLJ233   | 0.00245079 | 0.00661414 | 1.05999532 |
| JUND       | NM_005354.2 | JUND       | 19 | Homo sapiens jun D proto-or  | 0.00359468 | 0.00892347 | 1.05944043 |
| CAP1       | NM_006367.2 | CAP1       | 1  | Homo sapiens CAP1-PEN; CA    | 0.00125019 | 0.0039167  | 1.05880848 |
| TMBIM6     | NM_003217.1 | TMBIM6     | 12 | Homo sapiens BI-1; TMBIM6    | 0.00122504 | 0.00385346 | 1.05823603 |
| LOC646942  | XR_016892.2 | LOC646942  | 7  | PREDICTED: Homo sapiens n    | 0.02292538 | 0.03837257 | 1.05814482 |
| SLC20A1    | NM_005415.3 | SLC20A1    | 2  | Homo sapiens Glvr-1; PiT-1;  | 0.00728235 | 0.01557657 | 1.05766527 |
| RPS10      | NM_001014.3 | RPS10      | 6  | Homo sapiens MGC88819        | 0.01444315 | 0.02677723 | 1.05744572 |
| ANXA2      | NM_00100285 | ANXA2      | 15 | Homo sapiens P36; LPC2D; A   | 0.00051156 | 0.00196314 | 1.05704989 |
| NDUFA12    | NM_018838.3 | NDUFA12    | 12 | Homo sapiens DAP13; B17.2    | 0.00707296 | 0.01522761 | 1.05653109 |
| CST3       | NM_000099.2 | CST3       | 20 | Homo sapiens MGC117328       | 0.00797013 | 0.01673157 | 1.05468991 |
| PTPLAD1    | XM_941966.1 | PTPLAD1    | 15 | Homo sapiens B-IND1; HSPC    | 0.01146235 | 0.02238505 | 1.05418763 |
| C20orf43   | NM_016407.1 | C20ORF43   | 20 | Homo sapiens HSPC164; SHL    | 0.00647841 | 0.01420935 | 1.05399831 |
| EMD        | NM_000117.1 | EMD        |    | Homo sapiens STA; EDMD       | 0.01682393 | 0.03015213 | 1.05395856 |
| MAPRE1     | NM_012325.1 | MAPRE1     | 20 | Homo sapiens EB1; MGC1291    | 0.01207469 | 0.02327558 | 1.05308134 |
| KIAA0174   | NM_014761.2 | KIAA0174   | 16 | Homo sapiens MGC117220       | 0.01220353 | 0.02346982 | 1.05172262 |
| UBA1       | NM_003334.3 | UBA1       |    | Homo sapiens UBA1A; A1S9;    | 0.00846559 | 0.01757816 | 1.05167964 |
| CDKN2AIPNL | NM_080656.1 | CDKN2AIPNL | 5  | Homo sapiens MGC13017        | 0.00165632 | 0.00489419 | 1.05089434 |
| LOC730740  | XM_930111.1 | LOC730740  |    | PREDICTED: Homo sapiens s    | 0.00560856 | 0.01265128 | 1.04984224 |
| LY6E       | NM_002346.1 | LY6E       | 8  | Homo sapiens TSA-1; RIGE;    | 0.01722213 | 0.0306334  | 1.04889312 |
| PPP6C      | NM_002721.3 | PPP6C      | 9  | Homo sapiens protein phosph  | 0.0250094  | 0.04108256 | 1.04839667 |
| SHFM1      | NM_006304.1 | SHFM1      | 7  | Homo sapiens SHSF1; DSS1;    | 0.00856116 | 0.0177258  | 1.04815334 |
| RHOA       | NM_001664.2 | RHOA       | 3  | Homo sapiens RHO12; RHOH     | 0.00732811 | 0.01566521 | 1.04560153 |
| SDF2L1     | NM_022044.2 | SDF2L1     | 22 | Homo sapiens stromal cell-de | 0.01955479 | 0.03386797 | 1.04554829 |
| RAC2       | NM_002872.3 | RAC2       | 22 | Homo sapiens Gx; EN-7; HSF   | 0.02337614 | 0.03896501 | 1.04386127 |
| CDK5RAP3   | NM_176096.1 | CDK5RAP3   | 17 | Homo sapiens MST016; LZAF    | 0.03137469 | 0.04868363 | 1.04329345 |
| DSTN       | NM_006870.3 | DSTN       | 20 | Homo sapiens ACTDP; bA462    | 0.0295414  | 0.04659738 | 1.04265939 |
| FAT1       | NM_005245.3 | FAT1       | 4  | Homo sapiens ME5; hFat1; C   | 0.00934072 | 0.01901742 | 1.04105619 |
| FSCN1      | NM_003088.2 | FSCN1      | 7  | Homo sapiens FLJ38511; SN1   | 0.02978239 | 0.04686188 | 1.04020723 |

### 5.0 ACL-Dependent Upreg

| SYMBOL      | SEARCH_KEY  | ILMN_GENE   | CHROMOSOME | DEFINITION                  | SYNONYMS              | pval       | fdr        | fold       |            |
|-------------|-------------|-------------|------------|-----------------------------|-----------------------|------------|------------|------------|------------|
| PKD1        | NM_00100994 | PKD1        | 16         | Homo sapiens PBP            |                       | 0.00572608 | 0.00714255 | 2070.63461 |            |
| SLC6A17     | NM_00101089 | SLC6A17     | 1          | Homo sapiens NTT4           |                       | 0.01889508 | 0.01961958 | 539.914666 |            |
| TFPT        | NM_013342.1 | TFPT        | 19         | Homo sapiens FB1; amida     |                       | 0.00816312 | 0.00965663 | 206.548416 |            |
|             | Hs.578356   | HS.578356   | 14         | 602135270F1 NIH_MGC_81      |                       | 0.03070181 | 0.02953055 | 182.272487 |            |
|             | Hs.579070   | HS.579070   | 17         | DA481142 ERLTF1 Homo sap    |                       | 0.02354257 | 0.02373736 | 110.482964 |            |
| SNORA3      | NR_002580.1 | SNORA3      | 11         | Homo sapiens ACA3           |                       | 0.0140754  | 0.01527679 | 107.323154 |            |
| TBC1D17     | NM_024682.1 | TBC1D17     | 19         | Homo sapiens FLJ12168       |                       | 0.03491822 | 0.03286553 | 74.9703446 |            |
|             | Hs.545780   | HS.545780   | 9          | zu71d08.s1 Soares_testis_NI |                       | 5.562E-05  | 0.00014874 | 71.0740275 |            |
| LOC649864   | XM_941341.1 | LOC649864   |            | PREDICTED: Homo sapiens s   |                       | 0.00315162 | 0.00426601 | 48.0965134 |            |
| LOC647288   | XR_038777.1 | LOC647288   |            | PREDICTED: Homo sapiens n   |                       | 0.05105879 | 0.0451057  | 46.7779845 |            |
| LOC647363   | XM_942814.1 | LOC647363   |            | PREDICTED: Homo sapiens h   |                       | 0.01540184 | 0.0165001  | 43.8504206 |            |
| LOC388955   | NR_003131.1 | LOC388955   | 2          | Homo sapiens PX19 protein p |                       | 0.01426772 | 0.01546831 | 40.367799  |            |
| ICOSLG      | NM_015259.4 | ICOSLG      | 21         | Homo sapiens ICOSL; B7RP1   |                       | 0.01436674 | 0.01555068 | 39.6512769 |            |
| SLC9A6      | NM_006359.1 | SLC9A6      | X          | Homo sapiens KIAA0267; NH   |                       | 0.00021053 | 0.00043782 | 35.3033191 |            |
|             | Hs.571376   | HS.571376   | 7          | 602538817F1 NIH_MGC_59      |                       | 0.03375145 | 0.03193521 | 30.0202541 |            |
| LOC727963   | XR_015173.2 | LOC727963   | 15         | PREDICTED: Homo sapiens s   |                       | 0.01153397 | 0.01294437 | 25.3742771 |            |
| GPATCH8     | NM_00100290 | GPATCH8     | 17         | Homo sapiens GPATCH8; KIAA  |                       | 0.01472505 | 0.01587779 | 24.5188503 |            |
| LOC10013409 | XM_00172105 | LOC10013409 |            | PREDICTED: Homo sapiens s   |                       | 0.00535582 | 0.00674009 | 23.6376268 |            |
| C2orf18     | NM_017877.2 | C2ORF18     | 2          | Homo sapiens FLJ20555       |                       | 0.01435741 | 0.01554442 | 21.6635072 |            |
|             | Hs.580813   | HS.580813   | 20         | DB075090 TEST14 Homo sap    |                       | 0.0266306  | 0.02630975 | 20.7678518 |            |
|             | Hs.540658   | HS.540658   | 16         | Homo sapiens mRNA; cDNA I   |                       | 0.0215649  | 0.02199865 | 19.1764818 |            |
| MIR1253     | NR_031654.1 | MIR1253     |            | Homo sapiens microRNA 125   |                       | 0.02972954 | 0.02879105 | 18.522036  |            |
|             | Hs.137598   | HS.137598   | 9          | qe03b09.x1 Soares_testis_N  |                       | 0.03015995 | 0.02914675 | 18.2185916 |            |
|             | Hs.529962   | HS.529962   | 6          | EST389173 MAGE resequenc    |                       | 0.03642624 | 0.03407291 | 16.2303945 |            |
| SNORD100    | NR_002435.1 | SNORD100    | 6          | Homo sapiens HBII-429       |                       | 0.04573991 | 0.04123736 | 16.0777375 |            |
| LOC649571   | XM_938642.1 | LOC649571   |            | PREDICTED: Homo sapiens s   |                       | 0.00234601 | 0.00331998 | 15.2634442 |            |
| HERPUD2     | NM_022373.3 | HERPUD2     | 7          | Homo sapiens FLJ22313       |                       | 0.04185702 | 0.03825557 | 14.7798438 |            |
| TRADD       | NM_003789.2 | TRADD       | 16         | Homo sapiens MGC11078; H    |                       | 0.01997281 | 0.02058758 | 14.5443689 |            |
| LOC643995   | XM_934412.1 | LOC643995   | 17         | PREDICTED: Homo sapiens s   |                       | 0.03114175 | 0.02987838 | 14.113115  |            |
|             | Hs.581028   | HS.581028   | 22         | DA778026 OCBF2 Homo sa      |                       | 0.01329081 | 0.01457306 | 13.8583804 |            |
| SNORD21     | NR_000006.8 | SNORD21     | 1          | Homo sapiens U21; RNU21     |                       | 0.00176497 | 0.00260529 | 13.8028712 |            |
| HELQ        | NM_133636.1 | HELQ        | 4          | Homo sapiens MGC20604       |                       | 0.01391068 | 0.0151317  | 13.5312231 |            |
|             | 39334       | NM_144710.2 | 39334      | 2                           | Homo sapiens FLJ11619 |            | 0.00884333 | 0.01034552 | 13.5024655 |
|             | Hs.540229   | HS.540229   | 15         | oy61c12.s1 NCI_CGAP_Brn2    |                       | 0.02288124 | 0.02316105 | 13.3824892 |            |
| IRF5        | NM_002200.3 | IRF5        | 7          | Homo sapiens interferon reg |                       | 0.05132745 | 0.04528832 | 13.2069999 |            |
| CASP7       | NM_033338.4 | CASP7       | 10         | Homo sapiens ICE-LAP3; CAS  |                       | 0.00711018 | 0.00857639 | 12.2878893 |            |
| LOC10012924 | XM_00171934 | LOC10012924 |            | PREDICTED: Homo sapiens s   |                       | 0.05012536 | 0.04440181 | 12.1144362 |            |
| NCRNA00087  | NR_024493.1 | NCRNA00087  | X          | Homo sapiens non-protein cc |                       | 0.04877685 | 0.04346178 | 11.8578577 |            |
| LOC644322   | XM_933391.1 | LOC644322   | 9          | PREDICTED: Homo sapiens s   |                       | 0.00977568 | 0.01125615 | 11.2546727 |            |
| LOC730012   | NM_153832.1 | LOC730012   | 1          | PREDICTED: Homo sapiens s   |                       | 0.00389283 | 0.00512617 | 11.0719156 |            |
|             | Hs.134848   | HS.134848   | 14         | BX103634 Soares_NSF_F8_9    |                       | 0.01237429 | 0.01371898 | 11.0438767 |            |
| LOC641825   | XM_935575.1 | LOC641825   |            | PREDICTED: Homo sapiens h   |                       | 0.0009029  | 0.00147304 | 10.9715461 |            |
|             | Hs.544632   | HS.544632   | 6          | oa80h04.s1 NCI_CGAP_GCB     |                       | 0.0163013  | 0.01732198 | 10.8372286 |            |
| RLTPR       | NM_00101383 | RLTPR       | 16         | Homo sapiens LRRC16C        |                       | 0.03057934 | 0.02944503 | 10.7077921 |            |
| LOC644760   | XM_932354.1 | LOC644760   | 5          | PREDICTED: Homo sapiens h   |                       | 0.03814796 | 0.03543407 | 10.6790649 |            |
| GULP1       | NM_016315.2 | GULP1       | 2          | Homo sapiens CED-6; FLJ31   |                       | 0.00019421 | 0.00041069 | 10.6484087 |            |
| POPDC3      | NM_022361.3 | POPDC3      | 6          | Homo sapiens MGC22671; b    |                       | 0.00016339 | 0.00035662 | 10.4427051 |            |
| C3orf62     | NM_198562.1 | C3ORF62     | 3          | Homo sapiens FLJ43654; MG   |                       | 0.03310898 | 0.03140861 | 10.2215487 |            |
| ELK3        | NM_005230.2 | ELK3        | 12         | Homo sapiens SAP2; NET; EF  |                       | 0.0041305  | 0.00539944 | 9.85887195 |            |
|             | Hs.566420   | HS.566420   | 5          | UI-H-BW1-aoa-a-06-0-UI.s1   |                       | 0.04983014 | 0.04419831 | 9.50570238 |            |
|             | Hs.128463   | HS.128463   | 6          | BX102609 NCI_CGAP_Lu5 H     |                       | 0.00865537 | 0.01015541 | 9.46984705 |            |
|             | Hs.444550   | HS.444550   | 20         | ql44b06.x1 NCI_CGAP_Co8     |                       | 0.01454831 | 0.01571039 | 9.30438255 |            |
|             | Hs.569175   | HS.569175   | 12         | DA697821 NT2NE2 Homo sa     |                       | 0.00149225 | 0.00225858 | 9.19478217 |            |
| LOC10013468 | XR_036950.1 | LOC10013468 | 7          | PREDICTED: Homo sapiens n   |                       | 0.02487528 | 0.02487528 | 9.00573928 |            |
| NAGS        | NM_153006.2 | NAGS        | 17         | Homo sapiens ARG4; MGC13    |                       | 0.00960302 | 0.01109081 | 8.88473812 |            |
|             | Hs.486010   | HS.486010   |            | Homo sapiens mRNA; cDNA I   |                       | 0.00987628 | 0.01135559 | 8.75066698 |            |
|             | Hs.403584   | HS.403584   | 3          | UI-H-FE1-bei-a-08-0-UI.s2   |                       | 0.03963943 | 0.03657549 | 8.31174432 |            |
| LOC10013398 | XM_00171761 | LOC10013398 |            | PREDICTED: Homo sapiens h   |                       | 0.00660411 | 0.00805792 | 8.15412379 |            |
| C2orf48     | NM_182626.1 | C2ORF48     | 2          | Homo sapiens FLJ25102       |                       | 0.0287633  | 0.02798505 | 8.0209665  |            |
| LOC10013017 | XR_039527.1 | LOC10013017 |            | PREDICTED: Homo sapiens n   |                       | 0.00694761 | 0.00840573 | 7.73433636 |            |
| PLEKHA9     | NM_015899.1 | PLEKHA9     | 12         | Homo sapiens FLJ14156       |                       | 0.03103378 | 0.02980086 | 7.61163004 |            |
| RNF122      | NM_024787.2 | RNF122      | 8          | Homo sapiens MGC126622; I   |                       | 0.00300664 | 0.0040925  | 7.50353611 |            |
|             | Hs.521794   | HS.521794   | 8          | ha32c07.x1 NCI_CGAP_Kid1    |                       | 0.00599605 | 0.0074307  | 7.49092887 |            |
| CASP9       | NM_001229.2 | CASP9       | 1          | Homo sapiens ICE-LAP6; MC   |                       | 0.02340794 | 0.02362877 | 7.43365309 |            |
| SNORD88B    | NR_003068.1 | SNORD88B    | 19         | Homo sapiens HBII-180B      |                       | 0.02286726 | 0.02314958 | 7.29362247 |            |
| GRIN2C      | NM_000835.3 | GRIN2C      | 17         | Homo sapiens NR2C; NMDAR    |                       | 0.00415172 | 0.00541749 | 7.21344598 |            |
| LOC10012934 | XM_00171873 | LOC10012934 | 1          | PREDICTED: Homo sapiens h   |                       | 0.01344061 | 0.01471157 | 7.10843191 |            |
| LOC644075   | XM_930109.1 | LOC644075   | 1          | PREDICTED: Homo sapiens h   |                       | 0.03360003 | 0.03180566 | 7.05711843 |            |
| KIAA0889    | NM_152257.1 | KIAA0889    | 20         | Homo sapiens dJ469A13.6.1   |                       | 0.00153014 | 0.00230479 | 6.89188188 |            |

## 5.0 ACL-Dependent Upreg

|             |             |             |    |                               |            |            |            |
|-------------|-------------|-------------|----|-------------------------------|------------|------------|------------|
| LOC730027   | XM_496044.2 | LOC730027   | 15 | PREDICTED: Homo sapiens s     | 0.01527846 | 0.01639193 | 6.76706003 |
| LOC643888   | XM_943421.1 | LOC643888   |    | PREDICTED: Homo sapiens h     | 0.02524625 | 0.02517452 | 6.74533017 |
| LOC10013412 | XM_00172152 | LOC10013412 |    | PREDICTED: Homo sapiens h     | 0.00199059 | 0.00288256 | 6.68875088 |
|             | Hs.131259   | HS.131259   | 2  | BX111229 Soares_NFL_T_GE      | 0.01594685 | 0.01699061 | 6.68586712 |
| LOC644641   | XM_929614.1 | LOC644641   | 11 | PREDICTED: Homo sapiens h     | 0.01779918 | 0.01865385 | 6.66890391 |
| GLYCTK      | NM_145262.2 | GLYCTK      | 3  | Homo sapiens HBeAgBP4A; h     | 0.0003203  | 0.00062051 | 6.65586762 |
| CNTROB      | NM_053051.1 | CNTROB      | 17 | Homo sapiens PP1221; LIP8     | 0.00393319 | 0.0051731  | 6.61974048 |
| ERLIN2      | NM_00100379 | ERLIN2      | 8  | Homo sapiens C8orf2; MGC8     | 0.00078551 | 0.00131203 | 6.5178497  |
|             | Hs.146561   | HS.146561   | 7  | BX106374 Soares_fetal_hear    | 0.01164422 | 0.01304806 | 6.5121135  |
|             | Hs.42612    | HS.42612    | 2  | AGENCOURT_7782569 NIH_I       | 0.00651921 | 0.00797874 | 6.40162671 |
|             | Hs.573047   | HS.573047   | 4  | BX110921 Soares_fetal_liver : | 0.00086067 | 0.00141468 | 6.38244255 |
| SNORD46     | NR_000024.1 | SNORD46     | 1  | Homo sapiens U46; RNU40; l    | 0.00714703 | 0.00861493 | 6.36334855 |
|             | Hs.151334   | HS.151334   | 9  | im52e03.y1 HR85 islet Homc    | 0.00840618 | 0.0099041  | 6.22978488 |
|             | Hs.436323   | HS.436323   | 9  | UI-CF-FN0-af-r-k-06-0-UI.s1 l | 0.02230449 | 0.02264255 | 6.17677691 |
| LOC152024   | XM_944430.1 | LOC152024   |    | PREDICTED: Homo sapiens n     | 0.00230768 | 0.00327578 | 6.09015557 |
| AACS        | NM_023928.2 | AACS        | 12 | Homo sapiens FLJ41251; SU     | 0.01261751 | 0.01394634 | 6.08230614 |
|             | Hs.545519   | HS.545519   | 8  | UI-H-FG0-bcu-e-06-0-UI.s1 l   | 0.00034167 | 0.00065555 | 5.96754648 |
| WTIP        | XM_059037.7 | WTIP        | 19 | PREDICTED: Homo sapiens V     | 0.02332932 | 0.02356025 | 5.88115184 |
| LOC392145   | XM_373214.1 | LOC392145   | 7  | PREDICTED: Homo sapiens s     | 0.03058741 | 0.02944957 | 5.73939217 |
| MYADML      | NM_207329.1 | MYADML      | 2  | Homo sapiens myeloid-assoc    | 0.0053721  | 0.00675865 | 5.61305872 |
|             | Hs.569596   | HS.569596   |    | K-EST0070164 S225NU16 Hc      | 0.02377138 | 0.02392956 | 5.59130189 |
| PPP1R14A    | NM_033256.1 | PPP1R14A    | 19 | Homo sapiens CPI-17; CPI17    | 0.02448044 | 0.02456724 | 5.56206309 |
| FDXR        | NM_024417.1 | FDXR        | 17 | Homo sapiens ADXR             | 0.00461939 | 0.00592638 | 5.52059781 |
| LOC643772   | XM_927061.1 | LOC643772   | 9  | PREDICTED: Homo sapiens s     | 0.00026571 | 0.00053117 | 5.45748224 |
| HOXA2       | NM_006735.3 | HOXA2       | 7  | Homo sapiens HOX1K            | 0.00058964 | 0.00103285 | 5.39389326 |
|             | Hs.538367   | HS.538367   | 10 | nv82g01.s1 NCI_CGAP_Br4 h     | 0.05687727 | 0.0494247  | 5.3862541  |
| TGFBRAP1    | NM_004257.3 | TGFBRAP1    | 2  | Homo sapiens TRAP-1; TRAP     | 0.00513212 | 0.0064921  | 5.18727762 |
| LOC10013381 | XM_00171875 | LOC10013381 |    | PREDICTED: Homo sapiens s     | 0.00025131 | 0.00050771 | 5.15667577 |
|             | Hs.569304   | HS.569304   | 13 | DA193949 BRAMY3 Homo sa       | 0.00179165 | 0.00263978 | 5.12486296 |
|             | Hs.544487   | HS.544487   | 6  | naa41b05.x1 NCI_CGAP_Kid      | 0.05747237 | 0.04981847 | 5.08682667 |
|             | Hs.554608   | HS.554608   | 17 | HSC0QD082 normalized infar    | 0.02999034 | 0.02899242 | 5.06755413 |
| LRRC40      | NM_017768.3 | LRRC40      | 1  | Homo sapiens FLJ20331; RP4    | 0.00183511 | 0.00269207 | 5.04295728 |
|             | Hs.258266   | HS.258266   | 16 | K-EST0220612 L18POOL1n1       | 0.03489487 | 0.0328506  | 5.03983175 |
|             | Hs.541438   | HS.541438   | 2  | DKFZp434K0419_r1 434 (sy      | 0.00597212 | 0.00740523 | 5.02233885 |
|             | Hs.573575   | HS.573575   |    | AU310952 human 4S neurob      | 0.05241723 | 0.04607843 | 5.00483058 |
| LOC10013322 | XM_00172456 | LOC10013322 |    | PREDICTED: Homo sapiens s     | 0.00375115 | 0.00495895 | 4.96822213 |
| MIR635      | NR_030365.1 | MIR635      |    | Homo sapiens microRNA 635     | 0.02112979 | 0.02160755 | 4.9509712  |
| SNORA14B    | NR_002956.1 | SNORA14B    | 1  | Homo sapiens ACA14b           | 0.0058528  | 0.00727579 | 4.93727989 |
| NPNT        | NM_00103304 | NPNT        | 4  | Homo sapiens EGFL6L; POEM     | 0.03275811 | 0.03114985 | 4.90595452 |
|             | Hs.555181   | HS.555181   | 2  | AGENCOURT_6411402 NIH_I       | 0.0031211  | 0.004226   | 4.86773964 |
|             | Hs.558271   | HS.558271   | 6  | H.sapiens mRNA for CD58 T3    | 0.00628991 | 0.00774564 | 4.8668187  |
| SNORA59B    | NR_003022.1 | SNORA59B    | 17 | Homo sapiens ACA59            | 0.0004671  | 0.00084923 | 4.84675189 |
|             | Hs.569298   | HS.569298   | 13 | ov70a09.s1 Soares_testis_NI   | 0.00605941 | 0.00750074 | 4.83995775 |
|             | Hs.125056   | HS.125056   | 1  | Homo sapiens cDNA FLJ3666     | 0.04596906 | 0.04138866 | 4.80894431 |
| C17orf37    | NM_032339.3 | C17ORF37    | 17 | Homo sapiens RD1X2; MGC1      | 0.00863936 | 0.0101407  | 4.78065743 |
|             | Hs.190092   | HS.190092   | 1  | BX116001 Soares_testis_NH     | 0.02677299 | 0.02642365 | 4.77676938 |
| PLCH1       | NM_014996.1 | PLCH1       | 3  | Homo sapiens DKFZp434C13      | 0.0128342  | 0.01414308 | 4.73845491 |
| GNAQ        | NM_002072.2 | GNAQ        | 9  | Homo sapiens GAQ; G-ALPHA     | 0.00319792 | 0.0043167  | 4.73154763 |
| LOC642954   | XM_927104.1 | LOC642954   | 5  | PREDICTED: Homo sapiens h     | 0.03101551 | 0.02978983 | 4.63307752 |
|             | Hs.540741   | HS.540741   | 17 | op63a09.s1 Soares_NFL_T_C     | 0.04653211 | 0.04180552 | 4.60492934 |
| C17orf56    | NM_144679.1 | C17ORF56    | 17 | Homo sapiens FLJ31528         | 0.04214397 | 0.03847775 | 4.58487639 |
|             | Hs.563805   | HS.563805   | 1  | UI-H-BI3-akn-d-04-0-UI.s1 M   | 0.00335929 | 0.00450748 | 4.57477065 |
| SEMA3A      | NM_006080.1 | SEMA3A      | 7  | Homo sapiens SEMAIII; SEM     | 0.00069885 | 0.00118625 | 4.53040188 |
| DHODH       | NM_001361.3 | DHODH       | 16 | Homo sapiens DHOdehase        | 0.00016665 | 0.00036202 | 4.52139122 |
| PRG2        | NM_002728.4 | PRG2        | 11 | Homo sapiens MGC14537; M      | 0.01906587 | 0.01977819 | 4.44975882 |
| LOC390561   | XM_931039.1 | LOC390561   | 15 | PREDICTED: Homo sapiens s     | 0.05621057 | 0.04893258 | 4.39754066 |
|             | Hs.149244   | HS.149244   | 17 | DB336496 TESTI2 Homo sap      | 0.00808274 | 0.00957057 | 4.32907396 |
| LMX1B       | NM_002316.1 | LMX1B       | 9  | Homo sapiens LMX1.2; MGC1     | 0.00161994 | 0.0024193  | 4.29836542 |
| LOC652185   | XM_941547.1 | LOC652185   |    | PREDICTED: Homo sapiens s     | 0.00689587 | 0.00835119 | 4.27924281 |
|             | Hs.563438   | HS.563438   | 7  | UI-H-EI0-ayi-c-19-0-UI.s1 N   | 0.05280997 | 0.04636329 | 4.27702064 |
|             | Hs.545507   | HS.545507   |    | wt60c01.x1 NCI_CGAP_Pan1      | 0.04887148 | 0.04352399 | 4.27420133 |
| VN1R5       | NM_173858.1 | VN1R5       | 1  | Homo sapiens V1RL5            | 0.01578863 | 0.01684248 | 4.26166617 |
| LOC643339   | XM_931493.1 | LOC643339   | 12 | PREDICTED: Homo sapiens h     | 0.02706444 | 0.02664834 | 4.23772931 |
| LOC285484   | XM_938853.1 | LOC285484   |    | PREDICTED: Homo sapiens h     | 0.00157219 | 0.00235761 | 4.12272798 |
|             | Hs.539990   | HS.539990   | 14 | yy43f04.s1 Soares melanocy    | 0.00320237 | 0.00432137 | 4.09984945 |
|             | Hs.47702    | HS.47702    | 5  | BX111257 Soares_fetal_liver : | 0.01590552 | 0.01695275 | 4.07399032 |
| LOC10013055 | XM_00172134 | LOC10013055 |    | PREDICTED: Homo sapiens s     | 0.02040547 | 0.02097195 | 4.06982318 |
| LOC10012958 | XM_00171608 | LOC10012958 |    | PREDICTED: Homo sapiens h     | 0.01317771 | 0.01446712 | 4.06065239 |
|             | Hs.349049   | HS.349049   | 15 | 603630012F1 NIH_MGC_41 l      | 0.01062286 | 0.012081   | 4.05283957 |
|             | Hs.130455   | HS.130455   | 7  | BX118075 Soares_NFL_T_GE      | 0.05609214 | 0.04884403 | 4.01280069 |

## 5.0 ACL-Dependent Upreg

|             |             |              |                                 |            |            |            |
|-------------|-------------|--------------|---------------------------------|------------|------------|------------|
| LOC402562   | XM_939955.1 | LOC402562    | PREDICTED: Homo sapiens s       | 0.02872687 | 0.02796201 | 4.00004336 |
| MIR300      | NR_030582.1 | MIR300       | Homo sapiens microRNA 300       | 0.00245092 | 0.0034407  | 3.99348996 |
| DMXL2       | NM_015263.1 | DMXL2        | 15 Homo sapiens KIAA0856; FL    | 0.02010989 | 0.02071184 | 3.98842904 |
| LOC646762   | XM_929714.1 | LOC646762    | 7 PREDICTED: Homo sapiens h     | 0.03606159 | 0.03379666 | 3.9673496  |
| ATG16L2     | NM_033388.1 | ATG16L2      | 11 Homo sapiens FLJ00012; WC    | 0.0044259  | 0.00570568 | 3.96313865 |
| FAM38B      | NM_022068.1 | FAM38B       | 18 Homo sapiens HsT748; FLJ2    | 0.03037871 | 0.02930652 | 3.95819825 |
| LOC643130   | XM_926504.1 | LOC643130    | 21 PREDICTED: Homo sapiens s    | 0.00941035 | 0.0109085  | 3.92207598 |
| PROKR2      | NM_144773.2 | PROKR2       | 20 Homo sapiens PKR2; GPR73L    | 0.04842171 | 0.04320676 | 3.89453034 |
| LOC553158   | NM_181334.3 | LOC553158    | 22 Homo sapiens PRR5-ARHGAP     | 0.01127798 | 0.01270093 | 3.87792603 |
|             | Hs.545116   | HS.545116    | 7 UI-CF-DU1-adm-j-21-0-UI.s1    | 0.05228741 | 0.04598734 | 3.87458191 |
| LOC402693   | XM_938753.1 | LOC402693    | PREDICTED: Homo sapiens s       | 0.00027338 | 0.0005428  | 3.8484447  |
| SLC35B3     | NM_015948.2 | SLC35B3      | 6 Homo sapiens PAPST2; C6orf    | 0.03875234 | 0.03588528 | 3.8450054  |
| ZNF507      | NM_014910.2 | ZNF507       | 19 Homo sapiens zinc finger pro | 0.03460956 | 0.03262752 | 3.84222691 |
| LOC10012954 | XM_00171506 | LOC100129543 | PREDICTED: Homo sapiens h       | 0.00120478 | 0.00188594 | 3.83286101 |
| ZNF83       | NM_018300.2 | ZNF83        | 19 Homo sapiens MGC33853; Fl    | 3.7119E-05 | 0.00010752 | 3.83061914 |
| LOC10013366 | XM_00172080 | LOC100133669 | PREDICTED: Homo sapiens s       | 0.00498841 | 0.0063368  | 3.81985177 |
| CHRNA2      | NM_000742.1 | CHRNA2       | 8 Homo sapiens cholinergic rec  | 0.00386512 | 0.00509274 | 3.77352581 |
| CCDC64B     | NM_00110317 | CCDC64B      | 16 Homo sapiens MGC158069       | 0.01773817 | 0.01860991 | 3.7092534  |
| LOC554203   | XR_001081.1 | LOC554203 X  | PREDICTED: Homo sapiens h       | 0.020827   | 0.02134269 | 3.69220936 |
|             | Hs.560106   | HS.560106    | BX103457 Soares fetal liver :   | 0.03904981 | 0.03611501 | 3.68865075 |
| BAK1        | NM_001188.2 | BAK1         | 6 Homo sapiens MGC3887; BC      | 0.00538778 | 0.00677449 | 3.66831854 |
| ERAP2       | NM_022350.1 | ERAP2        | 5 Homo sapiens LRAP; FLJ236     | 0.0162234  | 0.01724965 | 3.66469485 |
| LOC131909   | XR_041879.1 | LOC131909    | PREDICTED: Homo sapiens n       | 7.1101E-06 | 2.9111E-05 | 3.65363406 |
| EDEM3       | NM_025191.2 | EDEM3        | 1 Homo sapiens C1orf22          | 4.989E-06  | 2.2356E-05 | 3.63137645 |
| MAN2C1      | NM_006715.2 | MAN2C1       | 15 Homo sapiens MANGA8; DKF     | 0.02605861 | 0.02583191 | 3.61818989 |
| ZNF271      | NM_006629.3 | ZNF271       | 18 Homo sapiens HZF7; ZNFEB     | 0.00020676 | 0.00043162 | 3.59614867 |
| LOC121792   | XM_938662.1 | LOC121792    | PREDICTED: Homo sapiens s       | 0.00570886 | 0.00712511 | 3.59549803 |
| RABGAP1L    | NM_014857.2 | RABGAP1L     | 1 Homo sapiens TBC1D18; EVI     | 0.03347899 | 0.03171503 | 3.56844502 |
| MOGAT3      | NM_178176.2 | MOGAT3       | 7 Homo sapiens DGAT2L7; MG      | 0.03978378 | 0.03667397 | 3.54851333 |
| C1orf203    | NR_024125.1 | C1ORF203     | Homo sapiens chromosome 1       | 0.00520639 | 0.00657278 | 3.54542905 |
|             | Hs.564097   | HS.564097    | 10 UI-H-DT0-aub-e-14-0-UI.s1    | 0.04290687 | 0.03904832 | 3.51088197 |
| LOC644264   | XM_927442.1 | LOC644264    | 17 PREDICTED: Homo sapiens s    | 0.01342935 | 0.01470291 | 3.50580057 |
| RASA2       | NM_006506.2 | RASA2        | 3 Homo sapiens GAP1M            | 0.00689157 | 0.00834829 | 3.49682676 |
| LOC644094   | XM_931995.1 | LOC644094    | 1 PREDICTED: Homo sapiens h     | 0.01065686 | 0.01211025 | 3.49179944 |
| LOC646869   | XM_943845.1 | LOC646869    | PREDICTED: Homo sapiens h       | 0.00084333 | 0.0013906  | 3.47612177 |
| LOC652271   | XM_941686.1 | LOC652271    | PREDICTED: Homo sapiens s       | 0.0037412  | 0.00494804 | 3.46790367 |
|             | Hs.543109   | HS.543109    | 3 we81d02.x1 Soares_NFL_T_(     | 0.00022558 | 0.00046341 | 3.46081825 |
| LOC10013481 | XM_00171466 | LOC10013481  | 7 PREDICTED: Homo sapiens h     | 0.05518458 | 0.04819724 | 3.4516513  |
| DTYMK       | NM_012145.2 | DTYMK        | 2 Homo sapiens CDC8; TYMK;      | 0.01376998 | 0.01500842 | 3.40969601 |
|             | Hs.492496   | HS.492496    | 8 UI-E-EJ0-ahm-h-09-0-UI.s1     | 0.02720937 | 0.02677001 | 3.3740499  |
| SMPD4       | NM_017751.1 | SMPD4        | 2 Homo sapiens KIAA1418; FL     | 0.00434603 | 0.00562006 | 3.37144843 |
| AACSL       | XM_376454.3 | AACSL        | 5 PREDICTED: Homo sapiens a     | 0.00773696 | 0.00921087 | 3.35463829 |
|             | Hs.526748   | HS.526748    | 2 UI-CF-FN0-af-r-k-03-18-UI.s1  | 0.04468666 | 0.04044571 | 3.35451174 |
| ZNF561      | NM_152289.1 | ZNF561       | 19 Homo sapiens MGC45408        | 0.05644801 | 0.04911492 | 3.3496148  |
| EZH1        | NM_001991.2 | EZH1         | 17 Homo sapiens KIAA0388        | 0.02060772 | 0.02114267 | 3.34486436 |
| UBE2DNL     | NR_024062.1 | UBE2DNL X    | Homo sapiens ubiquitin-conjt    | 0.01551869 | 0.01659691 | 3.34217851 |
| LOC149086   | XM_097580.5 | LOC149086    | 1 PREDICTED: Homo sapiens h     | 0.00615779 | 0.00761178 | 3.32534199 |
| COL9A3      | NM_001853.2 | COL9A3       | 20 Homo sapiens EDM3; FLJ907    | 0.04731818 | 0.04239021 | 3.32487068 |
| LOC139116   | XM_066484.1 | LOC139116 X  | PREDICTED: Homo sapiens s       | 0.0159754  | 0.01701483 | 3.32217846 |
| INSL5       | NM_005478.3 | INSL5        | 1 Homo sapiens PRO182; UNQ      | 0.03416964 | 0.03225785 | 3.31631402 |
| XAGE1E      | XM_931959.1 | XAGE1E X     | Homo sapiens X antigen fami     | 0.05312395 | 0.04660629 | 3.31419285 |
| LOC730041   | XR_042440.1 | LOC730041    | PREDICTED: Homo sapiens s       | 0.00280615 | 0.00385127 | 3.30614214 |
| L3MBTL4     | NM_173464.1 | L3MBTL4      | Homo sapiens HsT1031            | 0.0118837  | 0.01326222 | 3.30110309 |
| LOC654346   | XM_934665.1 | LOC654346    | 17 PREDICTED: Homo sapiens s    | 0.0308394  | 0.02964015 | 3.29283458 |
| LOC653701   | XM_929047.1 | LOC653701    | 19 PREDICTED: Homo sapiens s    | 0.04308042 | 0.03919406 | 3.28611279 |
| LOC642456   | XM_925964.1 | LOC642456    | 1 PREDICTED: Homo sapiens h     | 0.01705433 | 0.01801959 | 3.27063025 |
| OSBPL11     | NM_022776.3 | OSBPL11      | 3 Homo sapiens FLJ13164; FLJ    | 0.02378557 | 0.02393836 | 3.27038537 |
|             | Hs.571151   | HS.571151    | 6 AV705309 ADB Homo sapien      | 0.02954444 | 0.02864975 | 3.26688455 |
|             | Hs.154948   | HS.154948    | 5 BX106991 NCI_CGAP_GC4 H       | 0.00154539 | 0.00232498 | 3.26630676 |
| LOC415056   | NR_024369.1 | LOC415056    | 9 Homo sapiens hypothetical L   | 0.02465411 | 0.02471608 | 3.2661256  |
|             | Hs.527885   | HS.527885    | 12 BX106259 Soares_testis_NH    | 0.05235525 | 0.04603316 | 3.26298087 |
| NAIF1       | NM_197956.3 | NAIF1        | 9 Homo sapiens nuclear apopt    | 0.0361206  | 0.03384474 | 3.25860924 |
|             | Hs.539161   | HS.539161    | 12 z170b11.s1 Stratagene colon  | 0.01748404 | 0.0184005  | 3.24059223 |
| LOC728208   | XR_040782.1 | LOC728208    | PREDICTED: Homo sapiens n       | 0.03415933 | 0.03225158 | 3.23152307 |
| LOC339483   | XR_040225.1 | LOC339483    | PREDICTED: Homo sapiens n       | 0.02486936 | 0.02487503 | 3.22290247 |
| LOC649120   | XM_938201.1 | LOC649120    | PREDICTED: Homo sapiens s       | 0.05659438 | 0.04920812 | 3.22081536 |
| FLJ32255    | XM_943636.1 | FLJ32255     | PREDICTED: Homo sapiens h       | 0.03379324 | 0.03196097 | 3.19669383 |
|             | Hs.575322   | HS.575322    | UI-E-DX0-ags-g-08-0-UI.s1       | 0.01922802 | 0.01992755 | 3.19466488 |
| LOC10013432 | XM_00171559 | LOC100134320 | PREDICTED: Homo sapiens h       | 0.01453598 | 0.01570287 | 3.17865105 |
|             | Hs.22381    | HS.22381     | 2 602419370F1 NIH_MGC_93        | 0.03543403 | 0.03330457 | 3.17598592 |

## 5.0 ACL-Dependent Upreg

|             |             |              |    |                              |             |            |            |
|-------------|-------------|--------------|----|------------------------------|-------------|------------|------------|
| FLJ33534    | NM_182586.1 | FLJ33534     | 2  | Homo sapiens hypothetical p  | 0.0364418   | 0.03408382 | 3.17462816 |
|             | Hs.570107   | HS.570107    | 2  | UI-E-DW1-ahc-b-12-0-UI.s1    | 0.02141684  | 0.0218756  | 3.1686954  |
| LOC648689   | XM_937764.1 | LOC648689    |    | PREDICTED: Homo sapiens h    | 0.00351927  | 0.00469629 | 3.16330077 |
| LOC648615   | XM_937684.1 | LOC648615    |    | PREDICTED: Homo sapiens h    | 0.00976945  | 0.01125488 | 3.1426042  |
| LOC647311   | XM_930382.1 | LOC647311    | 14 | PREDICTED: Homo sapiens h    | 0.04302904  | 0.03915138 | 3.11391059 |
|             | Hs.554507   | HS.554507    | 9  | Homo sapiens primary neuro   | 0.03294133  | 0.03127323 | 3.10368704 |
| SNORD17     | NR_003045.1 | SNORD17      | 20 | Homo sapiens HBI-43          | 0.00213579  | 0.00306651 | 3.10312093 |
| PRO0628     | NR_002764.1 | PRO0628      | 20 | Homo sapiens hypothetical L  | 0.03331976  | 0.03158807 | 3.09116378 |
| C1orf161    | NM_152367.1 | C1ORF161     | 1  | Homo sapiens FLJ38716; RP!   | 0.00901192  | 0.0105147  | 3.0904345  |
| LOC643432   | XM_932844.1 | LOC643432    | 6  | PREDICTED: Homo sapiens h    | 0.011101321 | 0.01245391 | 3.08943399 |
| LOC649641   | XM_942147.1 | LOC649641    |    | PREDICTED: Homo sapiens h    | 0.03111332  | 0.0298609  | 3.08716777 |
| LOC644631   | XM_932272.1 | LOC644631    | 4  | PREDICTED: Homo sapiens h    | 0.00517526  | 0.00653914 | 3.08499098 |
|             | Hs.412918   | HS.412918    |    | Homo sapiens cDNA FLJ3255    | 0.05535547  | 0.04830322 | 3.08154348 |
|             | Hs.544713   | HS.544713    | 6  | zt62c04.s1 Soares_testis_NH  | 0.02702227  | 0.02661579 | 3.07618289 |
| LOC10012900 | XM_00171952 | LOC100129002 |    | PREDICTED: Homo sapiens h    | 0.00051957  | 0.00092884 | 3.07453978 |
| LOC653043   | XM_925278.1 | LOC653043    | 9  | PREDICTED: Homo sapiens s    | 0.00051695  | 0.00092528 | 3.06482997 |
| FLJ16331    | NM_00100432 | FLJ16331     | 11 | Homo sapiens FLJ16331 prot   | 0.01767151  | 0.01854885 | 3.06058272 |
|             | Hs.559121   | HS.559121    | 1  | BX116710 Soares_testis_NH'   | 0.0297075   | 0.02877925 | 3.06017962 |
| LOC731835   | Hs.569307   | LOC731835    |    | PREDICTED: Homo sapiens h    | 0.03022762  | 0.02919929 | 3.05419221 |
| LOC644168   | XM_927369.1 | LOC644168    |    | PREDICTED: Homo sapiens s    | 0.04847134  | 0.04324664 | 3.05086924 |
|             | Hs.574008   | HS.574008    | 12 | Homo sapiens unknown mRNA    | 0.01280786  | 0.01412116 | 3.03591789 |
| ZNF563      | NM_145276.1 | ZNF563       | 19 | Homo sapiens FLJ34797        | 0.04103887  | 0.03761361 | 3.03271216 |
| LOC653799   | XM_930003.1 | LOC653799    | 22 | PREDICTED: Homo sapiens s    | 0.01155614  | 0.01296096 | 3.01954309 |
| LOC729669   | XM_00113048 | LOC729669    |    | PREDICTED: Homo sapiens h    | 0.04669469  | 0.04191296 | 3.01037118 |
| ZNF586      | NM_017652.2 | ZNF586       | 19 | Homo sapiens FLJ20070        | 0.00323375  | 0.00435702 | 3.00449752 |
| LOC653234   | XM_934219.1 | LOC653234    | 10 | PREDICTED: Homo sapiens s    | 0.01071825  | 0.01216426 | 2.98978507 |
| LOC728119   | Hs.221513   | LOC728119    |    | PREDICTED: Homo sapiens h    | 0.04041974  | 0.03713148 | 2.97219998 |
|             | Hs.542544   | HS.542544    | 21 | xj38e12.x1 Soares_NFL_T_G    | 0.04001798  | 0.03684729 | 2.95122391 |
|             | Hs.540121   | HS.540121    | 14 | EST7714 human nasopharyn     | 0.04104576  | 0.037616   | 2.94977316 |
| LOC649107   | XM_943581.1 | LOC649107    |    | PREDICTED: Homo sapiens h    | 0.00233808  | 0.00331037 | 2.94960696 |
| CCT6B       | NM_006584.2 | CCT6B        | 17 | Homo sapiens TSA303; Cctz    | 0.03023808  | 0.02920618 | 2.93779723 |
| LOC653060   | XM_925779.1 | LOC653060    | 9  | PREDICTED: Homo sapiens s    | 0.01061288  | 0.01207279 | 2.9359974  |
| NT5M        | NM_020201.3 | NT5M         | 17 | Homo sapiens dNF-2; dNT2;    | 0.00440999  | 0.00569018 | 2.93593326 |
| KRT15       | NM_002275.2 | KRT15        | 17 | Homo sapiens K1CO; K15; C    | 1.272E-05   | 4.6042E-05 | 2.91285088 |
| KRTAP10-3   | NM_198696.2 | KRTAP10-3    | 21 | Homo sapiens KAP10.3; KAP    | 0.05413962  | 0.04743095 | 2.91020304 |
|             | Hs.127279   | HS.127279    | 17 | UI-H-FT1-bkc-b-11-0-UI.s1 M  | 0.03284341  | 0.0312039  | 2.90021704 |
| LOC389267   | XM_371726.2 | LOC389267    | 5  | PREDICTED: Homo sapiens s    | 0.05058152  | 0.04472911 | 2.89434414 |
|             | Hs.574140   | HS.574140    | 14 | UI-E-EJ0-aip-b-05-0-UI.s1 U' | 0.0204813   | 0.0210351  | 2.88770595 |
| TSN         | NM_004622.2 | TSN          | 2  | Homo sapiens REHF-1; TRSL    | 0.01472788  | 0.0158789  | 2.88560852 |
| HIST1H2AD   | NM_021065.2 | HIST1H2AD    | 6  | Homo sapiens H2AFG; H2A/c    | 0.04652321  | 0.04180609 | 2.87963927 |
| ZNF12       | NM_016265.2 | ZNF12        | 7  | Homo sapiens HZF11; ZNF32    | 0.01799807  | 0.0188263  | 2.86346721 |
| LOC645781   | XM_933141.1 | LOC645781    | 19 | PREDICTED: Homo sapiens s    | 0.01382242  | 0.01505623 | 2.86239556 |
|             | Hs.562197   | HS.562197    | 1  | 602137688F1 NIH_MGC_83 I     | 0.01146031  | 0.01287487 | 2.86148773 |
|             | Hs.285193   | HS.285193    | 15 | Homo sapiens cDNA clone IM   | 0.02486409  | 0.0248726  | 2.8542481  |
|             | Hs.399823   | HS.399823    | 16 | AGENCOURT_7906098 NIH_I      | 0.01531163  | 0.01641949 | 2.83566387 |
|             | Hs.539599   | HS.539599    | 13 | hv29g09.x1 NCI_CGAP_Lu24     | 0.0270973   | 0.02667771 | 2.83011081 |
| OR2Y1       | NM_00100165 | OR2Y1        | 5  | Homo sapiens OR5-2           | 0.0235971   | 0.02377868 | 2.82997904 |
| EHHADH      | NM_001966.2 | EHHADH       | 3  | Homo sapiens ECHD; LBFP; I   | 0.01481035  | 0.01595017 | 2.8293226  |
| LOC652350   | XM_941778.1 | LOC652350    |    | PREDICTED: Homo sapiens s    | 0.02354959  | 0.02373899 | 2.82773775 |
|             | Hs.538703   | HS.538703    | 11 | yj18b03.s1 Soares_placenta I | 0.04031652  | 0.03705218 | 2.81975465 |
|             | Hs.576601   | HS.576601    | 10 | DB297320 BRACE2 Homo sa      | 0.00244631  | 0.00343533 | 2.81677551 |
|             | Hs.583098   | HS.583098    | 7  | DB305811 BRAWH3 Homo sa      | 0.02437926  | 0.0244713  | 2.81456393 |
| MIR517B     | NR_030205.1 | MIR517B      |    | Homo sapiens microRNA 517    | 0.03301637  | 0.0313343  | 2.81439711 |
| LOC646103   | XM_373058.2 | LOC646103    | 5  | PREDICTED: Homo sapiens s    | 0.02895623  | 0.02815091 | 2.81391109 |
| LOC10012990 | XM_00172603 | LOC10012990  | 6  | PREDICTED: Homo sapiens h    | 0.03956358  | 0.03651702 | 2.81068162 |
|             | Hs.129094   | HS.129094    | 1  | BX093818 NCI_CGAP_Lu5 Hc     | 0.05194167  | 0.04573369 | 2.80585206 |
| LOC644655   | XM_927761.1 | LOC644655    | 1  | PREDICTED: Homo sapiens s    | 0.00136655  | 0.00209765 | 2.80078513 |
| AQP12B      | NM_00110246 | AQP12B       | 2  | Homo sapiens INSSA3; MGC:    | 0.01006993  | 0.01153742 | 2.80041191 |
| DCDC1       | NM_181807.1 | DCDC1        | 11 | Homo sapiens doublecortin d  | 0.03627043  | 0.0339525  | 2.79271064 |
| C3orf41     | XM_934359.1 | C3ORF41      | 3  | PREDICTED: Homo sapiens c    | 0.03177572  | 0.03041014 | 2.79234761 |
| TMEM150B    | XM_209187.5 | TMEM150B     | 19 | Homo sapiens transmembran    | 0.01357494  | 0.01482715 | 2.78439393 |
| LOC150223   | NM_00101796 | LOC150223    | 22 | Homo sapiens hypothetical p  | 0.02553214  | 0.02540186 | 2.77626259 |
| IL4I1       | NM_172374.1 | IL4I1        | 19 | Homo sapiens FIG1            | 0.00585033  | 0.00727477 | 2.77582743 |
| LOC649396   | XM_938466.1 | LOC649396    |    | PREDICTED: Homo sapiens h    | 0.00984694  | 0.01132631 | 2.77297827 |
| LOC729766   | Hs.216363   | LOC729766    | 1  | PREDICTED: Homo sapiens h    | 0.01774925  | 0.01861708 | 2.76740045 |
| KCTD17      | NM_024681.1 | KCTD17       | 22 | Homo sapiens HJL12242        | 0.00273582  | 0.00377067 | 2.76527777 |
| CCDC135     | NM_032269.3 | CCDC135      | 16 | Homo sapiens DKFZp434I09!    | 0.05175371  | 0.04561397 | 2.75649163 |
| LOC10013303 | XM_00171676 | LOC10013303  | 9  | PREDICTED: Homo sapiens h    | 0.01423599  | 0.01543771 | 2.75463247 |
| TEKT4       | NM_144705.2 | TEKT4        | 2  | Homo sapiens MGC27019        | 0.00305236  | 0.00414701 | 2.7543932  |
|             | Hs.569340   | HS.569340    | 14 | DA483022 FCBBF1 Homo sa      | 0.0137157   | 0.01496041 | 2.75349109 |

## 5.0 ACL-Dependent Upreg

|             |             |               |                                 |            |            |            |
|-------------|-------------|---------------|---------------------------------|------------|------------|------------|
| LOC648403   | XM_937452.1 | LOC648403     | PREDICTED: Homo sapiens s       | 0.02770465 | 0.02716288 | 2.75275138 |
| LOC344328   | XR_038996.1 | LOC344328     | PREDICTED: Homo sapiens n       | 0.03249927 | 0.03095403 | 2.74738531 |
| LOC10012989 | XM_00171987 | LOC100129890  | PREDICTED: Homo sapiens s       | 0.00816192 | 0.00965652 | 2.74720946 |
| LOC647726   | XM_929571.1 | LOC647726     | PREDICTED: Homo sapiens s       | 0.01756833 | 0.01846485 | 2.73606544 |
|             | Hs.582537   | HS.582537     | 5 DKFZp686N20145_r1 686 (s'     | 0.0320648  | 0.03061667 | 2.73115695 |
|             | Hs.541726   | HS.541726     | 2 UI-CF-DU1-adj-b-02-0-UI.s1    | 0.00128787 | 0.00199502 | 2.72351604 |
| LOC10012953 | XM_00172276 | LOC100129532  | PREDICTED: Homo sapiens h       | 0.01914197 | 0.01985245 | 2.71967264 |
| LOC653392   | XM_929544.1 | LOC653392     | 7 PREDICTED: Homo sapiens s     | 0.01097226 | 0.01241241 | 2.71217847 |
| LOC388820   | XR_042089.1 | LOC388820     | 21 PREDICTED: Homo sapiens n    | 0.00268096 | 0.00370962 | 2.70815076 |
| MRPS36      | NM_033281.5 | MRPS36        | 5 Homo sapiens MRP-S36; MGI     | 0.04052907 | 0.03720076 | 2.707026   |
| CLK2P       | XM_935713.1 | CLK2P         | 7 Homo sapiens CDC-like kinas   | 0.0236529  | 0.02381849 | 2.70676106 |
| LOC441958   | XM_928605.1 | LOC441958     | 13 PREDICTED: Homo sapiens h    | 0.00584004 | 0.00726404 | 2.70567659 |
| LOC645165   | XM_928202.1 | LOC645165     | 6 PREDICTED: Homo sapiens h     | 0.01344762 | 0.01471557 | 2.70436389 |
|             | Hs.544465   | HS.544465     | 6 RST2825 Athersys RAGE Libr    | 0.02869008 | 0.0279386  | 2.70276709 |
| LOC10013277 | XM_00172033 | LOC10013277   | 9 PREDICTED: Homo sapiens s     | 0.00154673 | 0.00232619 | 2.69850567 |
| LOC645804   | XR_037755.1 | LOC645804     | PREDICTED: Homo sapiens n       | 0.01232025 | 0.01366944 | 2.69469194 |
|             | Hs.565987   | HS.565987     | 3 UI-H-EI1-aza-j-19-0-UI.s1 N   | 0.03862843 | 0.03579698 | 2.69224467 |
|             | Hs.571950   | HS.571950     | ym35h10.s1 Soares infant br     | 0.01347337 | 0.01474006 | 2.68766182 |
| LOC441453   | XR_041341.1 | LOC441453     | 11 PREDICTED: Homo sapiens n    | 0.00918448 | 0.01069046 | 2.67245772 |
|             | Hs.148886   | HS.148886     | 11 qj94h02.x1 NCI_CGAP_Kid3     | 0.02181004 | 0.02219711 | 2.66629748 |
|             | Hs.164030   | HS.164030     | 12 UI-E-E00-ahx-p-21-0-UI.r1 l  | 0.04738346 | 0.04244002 | 2.66448948 |
| KIR2DL1     | NM_014218.1 | KIR2DL1       | 19 Homo sapiens KIR-K65; CL-4   | 0.00331023 | 0.00445049 | 2.66081062 |
|             | Hs.574671   | HS.574671     | 2 AV645572 GLC Homo sapien:     | 0.00575048 | 0.00716279 | 2.65807744 |
| HAUS5       | NM_015302.1 | HAUS5         | 19 Homo sapiens HAUS augmin-    | 0.02978926 | 0.02883934 | 2.64905092 |
| NOX5        | NM_024505.2 | NOX5          | 15 Homo sapiens NOX5A; MGC1     | 0.03045381 | 0.0293596  | 2.64895332 |
| LOC642228   | XM_936381.1 | LOC642228     | PREDICTED: Homo sapiens h       | 0.03021386 | 0.02918921 | 2.64751279 |
|             | Hs.574069   | HS.574069     | 12 ou17h07.s1 Soares_NFL_T_C    | 0.00030765 | 0.00060052 | 2.64508562 |
| ZNF367      | NM_153695.2 | ZNF367        | 9 Homo sapiens ZFF29; CDC14     | 0.03291306 | 0.03125316 | 2.64489858 |
| ZNF124      | NM_003431.2 | ZNF124        | 1 Homo sapiens MGC117046; I     | 0.02654998 | 0.02625079 | 2.64030563 |
|             | Hs.575696   | HS.575696     | HESC3_16_C05.g1_A036 Hu         | 0.05364979 | 0.0470488  | 2.63736138 |
|             | Hs.538299   | HS.538299     | 10 ob97f11.s1 NCI_CGAP_GCB1     | 0.05505929 | 0.04810218 | 2.63718402 |
| LOC647836   | XM_936893.1 | LOC647836     | PREDICTED: Homo sapiens s       | 0.01329222 | 0.01457278 | 2.63609466 |
| CA13        | NM_198584.1 | CA13          | 8 Homo sapiens MGC59868; C      | 0.00234964 | 0.00332458 | 2.63169041 |
| LOC729810   | XR_040841.1 | LOC729810     | 1 PREDICTED: Homo sapiens n     | 0.04246671 | 0.03872406 | 2.63048216 |
|             | Hs.333693   | HS.333693     | 2 RST32057 Athersys RAGE Lit    | 0.04596728 | 0.04139131 | 2.61880583 |
| TMEM105     | NM_178520.2 | TMEM105       | 17 Homo sapiens FLJ38792        | 0.05606048 | 0.0488213  | 2.6072419  |
| MIR373      | NR_029866.1 | MIR373        | Homo sapiens microRNA 373       | 0.02550677 | 0.02538525 | 2.60500989 |
| LOC643246   | XM_926608.1 | LOC643246     | 12 PREDICTED: Homo sapiens s    | 0.01522745 | 0.0163412  | 2.59854921 |
| LOC728257   | XR_015365.2 | LOC728257     | PREDICTED: Homo sapiens n       | 0.00082538 | 0.00136819 | 2.59820643 |
| LOC731642   | XR_039391.1 | LOC731642     | PREDICTED: Homo sapiens n       | 0.04108701 | 0.03763807 | 2.5956838  |
| LOC652876   | XM_942592.1 | LOC652876     | PREDICTED: Homo sapiens s       | 0.0340591  | 0.0321708  | 2.59484549 |
| OR4C15      | NM_00100192 | OR4C15        | 11 Homo sapiens OR11-127; OF    | 0.00616814 | 0.00762243 | 2.58894762 |
|             | Hs.570139   | HS.570139     | 2 DA266249 BRCAN2 Homo sa       | 0.04393485 | 0.03986394 | 2.58562599 |
|             | Hs.395787   | HS.395787     | 7 BX106738 Soares fetal liver : | 0.04569091 | 0.04120165 | 2.5830175  |
| MIR9-1      | NR_029691.1 | MIR9-1        | Homo sapiens microRNA 9-1       | 0.04293053 | 0.03906581 | 2.57379747 |
|             | Hs.117869   | HS.117869     | 14 K-EST0222744 L17N670205r     | 0.04754597 | 0.0425682  | 2.56992706 |
| VGLL1       | NM_016267.2 | VGLL1         | Homo sapiens VGL1; TDU          | 0.02380979 | 0.02395449 | 2.56874589 |
| SNORD53     | NR_002741.1 | SNORD53       | 2 Homo sapiens RNU53; U53       | 0.00838608 | 0.00988706 | 2.55939644 |
| LOC731444   | XM_925913.1 | LOC731444     | PREDICTED: Homo sapiens s       | 0.0135632  | 0.01481802 | 2.55509058 |
| OR11H4      | NM_00100447 | OR11H4        | 14 Homo sapiens OR14-36         | 0.01751927 | 0.01842432 | 2.55144372 |
| LOC643397   | XM_938878.1 | LOC643397     | 2 PREDICTED: Homo sapiens s     | 0.02530296 | 0.02521388 | 2.54967823 |
| DKFZp686O13 | XM_379141.3 | DKFZp686O1327 | PREDICTED: Homo sapiens h       | 0.04904525 | 0.04365659 | 2.54312964 |
|             | Hs.543093   | HS.543093     | 3 UI-1-BC0-afw-h-09-0-UI.s1 l   | 0.05743081 | 0.0497972  | 2.53276325 |
| REP15       | NM_00102987 | REP15         | 12 Homo sapiens RAB15 effecto   | 0.05444236 | 0.0476201  | 2.53249681 |
| LOC652789   | XM_942448.1 | LOC652789     | PREDICTED: Homo sapiens s       | 0.03555002 | 0.03340643 | 2.52052227 |
| LOC642515   | XM_926011.1 | LOC642515     | 9 PREDICTED: Homo sapiens s     | 0.01770922 | 0.01858399 | 2.51483006 |
|             | Hs.128035   | HS.128035     | qf54c05.x1 Soares_testis_Nf     | 0.02477797 | 0.02480341 | 2.51162347 |
| CIZ1        | NM_012127.2 | CIZ1          | 9 Homo sapiens LSFRI; ZNF35     | 0.01492095 | 0.01605155 | 2.50645786 |
|             | Hs.430335   | HS.430335     | QV0-HT0398-210100-096-c0        | 0.05098431 | 0.04505805 | 2.5054305  |
| SUPT6H      | NM_003170.3 | SUPT6H        | 17 Homo sapiens MGC87943; SI    | 0.00083575 | 0.00138096 | 2.50242594 |
|             | Hs.565908   | HS.565908     | 3 UI-E-E01-aiv-l-12-0-UI.s1 U   | 0.00492132 | 0.00626428 | 2.49691608 |
| PCIF1       | NM_022104.3 | PCIF1         | 20 Homo sapiens PCIF1           | 0.00815384 | 0.00964825 | 2.49572125 |
|             | Hs.126963   | HS.126963     | 16 wq04a09.x1 NCI_CGAP_Kid1     | 0.01340024 | 0.01467653 | 2.49037895 |
|             | Hs.543759   | HS.543759     | 4 wy86a10.x1 Soares_NSF_F8      | 0.02797921 | 0.0273984  | 2.48631626 |
|             | Hs.562917   | HS.562917     | BX118281 NCI_CGAP_CLL1 f        | 0.01878103 | 0.01951732 | 2.48479056 |
|             | Hs.572624   | HS.572624     | 19 hz27a12.x1 NCI_CGAP_GC6      | 0.02465197 | 0.02471676 | 2.47471674 |
| ZNF345      | NM_003419.2 | ZNF345        | 19 Homo sapiens HZF10           | 0.0275961  | 0.02708066 | 2.4692362  |
|             | Hs.560098   | HS.560098     | 12 AGENCOURT_7543948 NIH_I      | 0.04414613 | 0.04002254 | 2.46722717 |
| SNORA52     | NR_002585.1 | SNORA52       | 11 Homo sapiens ACA52           | 0.01828039 | 0.0190716  | 2.46217044 |
|             | Hs.98458    | HS.98458      | 4 BX118817 Soares_testis_NH'    | 0.011084   | 0.01252266 | 2.45965951 |

## 5.0 ACL-Dependent Upreg

|             |             |              |    |                                |            |            |            |
|-------------|-------------|--------------|----|--------------------------------|------------|------------|------------|
| MIP         | NM_012064.2 | MIP          | 12 | Homo sapiens AQP0; LIM1; M     | 0.00959865 | 0.01108722 | 2.45187368 |
| MUC2        | NM_002457.2 | MUC2         | 11 | Homo sapiens SMUC; MLP         | 0.01857599 | 0.0193363  | 2.44869449 |
| TNFSF4      | NM_003326.2 | TNFSF4       | 1  | Homo sapiens TXGP1; OX40I      | 0.02501738 | 0.02499459 | 2.44675706 |
| LOC647527   | XM_942881.1 | LOC647527    |    | PREDICTED: Homo sapiens h      | 0.00706412 | 0.00852435 | 2.43969208 |
| SNORA1      | NR_003026.1 | SNORA1       | 11 | Homo sapiens ACA1              | 0.02792568 | 0.02734903 | 2.4315587  |
| LOC641944   | XM_935704.1 | LOC641944    |    | PREDICTED: Homo sapiens h      | 0.02851574 | 0.02779968 | 2.4305605  |
| LOC644827   | XM_932427.1 | LOC644827    |    | PREDICTED: Homo sapiens h      | 0.03631971 | 0.03398774 | 2.4302268  |
| LOC652614   | XM_942149.1 | LOC652614    |    | PREDICTED: Homo sapiens s      | 0.00251448 | 0.00351083 | 2.4269879  |
| NOS2        | NM_000625.4 | NOS2         | 17 | Homo sapiens nitric oxide sy   | 0.00544787 | 0.00683829 | 2.42368882 |
| MIR1471     | NR_031717.1 | MIR1471      |    | Homo sapiens microRNA 147      | 0.03055682 | 0.02943304 | 2.40966623 |
| RGL2        | NM_004761.2 | RGL2         | 6  | Homo sapiens HKE1.5; RAB2      | 0.00477544 | 0.00610339 | 2.39776885 |
|             | Hs.147255   | Hs.147255    |    | BX103599 NCI_CGAP_GC6 H        | 0.01009828 | 0.01156235 | 2.39637504 |
| LOC10013249 | XM_00172266 | LOC10013249  | 1  | PREDICTED: Homo sapiens s      | 0.00435377 | 0.00562841 | 2.39296456 |
|             | Hs.573956   | Hs.573956    |    | 11 BX417275 Homo sapiens PL    | 0.01598562 | 0.01702364 | 2.39057997 |
|             | Hs.552826   | Hs.552826    |    | 1 Homo sapiens cDNA FLJ3746    | 0.01177618 | 0.01317071 | 2.39007679 |
| LOC649703   | XM_943857.1 | LOC649703    |    | PREDICTED: Homo sapiens h      | 0.05752894 | 0.04986258 | 2.38729006 |
| CYSLTR2     | NM_020377.2 | CYSLTR2      | 13 | Homo sapiens PSEC0146; HC      | 0.01802592 | 0.01885094 | 2.38076688 |
| IRF6        | NM_006147.2 | IRF6         | 1  | Homo sapiens VWS; LPS; PI      | 0.0080183  | 0.00950711 | 2.37694226 |
|             | Hs.574968   | Hs.574968    |    | wm07h02.x1 NCI_CGAP_Ut4        | 0.02696103 | 0.02656441 | 2.37583779 |
| NR6A1       | NM_033334.2 | NR6A1        | 9  | Homo sapiens NR61; GCNF; I     | 0.05221103 | 0.04593398 | 2.37344967 |
| FLJ44290    | NM_198564.1 | FLJ44290     | 3  | Homo sapiens FLJ44290 prot     | 0.01370323 | 0.01495239 | 2.37241028 |
|             | Hs.518008   | Hs.518008    |    | 3 zt57d01.s1 Soares_testis_N   | 0.02221518 | 0.02256755 | 2.36563544 |
| LOC646330   | XR_017189.2 | LOC646330    | 1  | PREDICTED: Homo sapiens n      | 0.05150176 | 0.04542385 | 2.36538103 |
|             | Hs.495112   | Hs.495112    |    | 14 Human TCR variable region V | 0.0078774  | 0.00935901 | 2.36537353 |
| TLX3        | NM_021025.2 | TLX3         | 5  | Homo sapiens RNX; MGC298       | 0.00643197 | 0.00788406 | 2.35985847 |
|             | Hs.555595   | Hs.555595    |    | Human (clone xip8) mRNA se     | 0.05436411 | 0.04757538 | 2.35503886 |
| AASDH       | NM_181806.2 | AASDH        | 4  | Homo sapiens LYS2; ACSF4;      | 9.655E-05  | 0.00023298 | 2.35443393 |
|             | Hs.136788   | Hs.136788    |    | 5 ac76f10.x5 Stratagene lung ( | 0.01245707 | 0.01379158 | 2.35209226 |
| IFI44       | NM_006417.2 | IFI44        | 1  | Homo sapiens p44; MTAP44       | 0.02740031 | 0.02692165 | 2.34272231 |
|             | Hs.137293   | Hs.137293    |    | 1 zb53f02.y5 Soares_fetal_lun  | 0.03843    | 0.03565829 | 2.34129091 |
| LOC642243   | XM_936390.1 | LOC642243    |    | PREDICTED: Homo sapiens s      | 0.01902407 | 0.01973716 | 2.33963992 |
|             | Hs.545428   | Hs.545428    |    | 8 nac37g08.x1 Lupski_sciatic_  | 0.03908986 | 0.03614061 | 2.3385835  |
| LOC648289   | XM_937347.1 | LOC648289    |    | PREDICTED: Homo sapiens h      | 0.01458415 | 0.01574328 | 2.33225777 |
| RIMBP3B     | NM_00112863 | RIMBP3B      | 22 | Homo sapiens RIMS binding      | 0.01858023 | 0.01933843 | 2.32769849 |
| PPAPDC2     | NM_203453.2 | PPAPDC2      | 9  | Homo sapiens bA6J24.6; FLJ     | 0.00151152 | 0.00228184 | 2.32229549 |
| LOC648665   | XR_042388.1 | LOC648665    |    | PREDICTED: Homo sapiens n      | 0.04856244 | 0.04331912 | 2.31265625 |
| LOC644403   | XM_932168.1 | LOC644403    | X  | PREDICTED: Homo sapiens h      | 0.05022882 | 0.04447549 | 2.30894472 |
| LOC10012851 | XR_038051.1 | LOC100128516 |    | PREDICTED: Homo sapiens n      | 0.00732888 | 0.00880388 | 2.30725124 |
| LOC647704   | XM_936765.1 | LOC647704    |    | PREDICTED: Homo sapiens s      | 0.05694134 | 0.04945588 | 2.30123334 |
| ZNF608      | NM_020747.1 | ZNF608       | 5  | Homo sapiens NY-REN-36; D      | 0.04781489 | 0.04278277 | 2.30002097 |
| CXCL13      | NM_006419.1 | CXCL13       | 4  | Homo sapiens SCYB13; ANGI      | 0.01964797 | 0.02030283 | 2.29896855 |
|             | Hs.334998   | Hs.334998    |    | 13 qd61b01.x1 Soares_testis_N  | 0.0421059  | 0.038459   | 2.29878569 |
| LOC650407   | XM_944179.1 | LOC650407    |    | PREDICTED: Homo sapiens h      | 0.03054201 | 0.02942523 | 2.29852132 |
| LOC647246   | XM_930292.1 | LOC647246    | 1  | PREDICTED: Homo sapiens s      | 0.04952948 | 0.04398499 | 2.29370169 |
| LOC645487   | XM_932932.1 | LOC645487    | 20 | PREDICTED: Homo sapiens h      | 0.01276704 | 0.01408146 | 2.29246125 |
|             | Hs.552427   | Hs.552427    |    | 17 Homo sapiens mRNA; cDNA I   | 0.01928154 | 0.01997358 | 2.28801126 |
| LOC652148   | XM_945224.1 | LOC652148    |    | PREDICTED: Homo sapiens h      | 0.00070811 | 0.00119895 | 2.28772797 |
| LOC646082   | XM_929042.1 | LOC646082    | 22 | PREDICTED: Homo sapiens s      | 0.01696812 | 0.01794363 | 2.28600115 |
| PTPRQ       | XM_926134.1 | PTPRQ        | 12 | PREDICTED: Homo sapiens p      | 0.01950703 | 0.02016669 | 2.28294201 |
| LOC645052   | XM_928103.1 | LOC645052    | 1  | PREDICTED: Homo sapiens s      | 0.01351984 | 0.01478717 | 2.28123419 |
| LOC728690   | XM_00171562 | LOC728690    |    | PREDICTED: Homo sapiens h      | 0.0459273  | 0.0413638  | 2.28120866 |
| MANEA       | XM_938989.1 | MANEA        |    | PREDICTED: Homo sapiens n      | 1.0134E-06 | 6.7718E-06 | 2.28068917 |
|             | Hs.444152   | Hs.444152    |    | 13 we92b05.x1 Soares_NFL_T_    | 0.02751075 | 0.02701503 | 2.28009464 |
| RESP18      | NM_00100708 | RESP18       |    | Homo sapiens regulated endo    | 0.02722849 | 0.02678583 | 2.27993462 |
| FLJ36492    | NM_182568.2 | FLJ36492     | 17 | Homo sapiens MGC126634         | 0.02210538 | 0.02247943 | 2.27914884 |
| BGLAP       | NM_199173.2 | BGLAP        | 1  | Homo sapiens BGP; PMF1         | 0.03122947 | 0.02994943 | 2.27422421 |
| TFR2        | NM_003227.2 | TFR2         | 7  | Homo sapiens HFE3; MGC12       | 0.02551123 | 0.02538681 | 2.27389335 |
| LSAMP       | NM_002338.2 | LSAMP        | 3  | Homo sapiens LAMP              | 0.03276722 | 0.03115513 | 2.27095444 |
| LOC645320   | XM_939804.1 | LOC645320    |    | PREDICTED: Homo sapiens h      | 0.00360388 | 0.0047859  | 2.2662823  |
|             | Hs.567192   | Hs.567192    | X  | xp82e07.x1 NCI_CGAP_Ov4        | 0.03585649 | 0.03363319 | 2.26466052 |
| LOC731186   | Hs.538470   | LOC731186    |    | PREDICTED: Homo sapiens h      | 0.04790358 | 0.04284465 | 2.26018802 |
| GPR21       | NM_005294.1 | GPR21        | 9  | Homo sapiens G protein-cou     | 0.0379926  | 0.0352935  | 2.25968821 |
| LOC650759   | XM_944798.1 | LOC650759    |    | PREDICTED: Homo sapiens s      | 0.02801734 | 0.02742655 | 2.2590368  |
| LOC648657   | XM_943417.1 | LOC648657    |    | PREDICTED: Homo sapiens h      | 0.00851792 | 0.01001692 | 2.25634071 |
|             | Hs.158036   | Hs.158036    |    | 5 BX118491 NCI_CGAP_Brn23      | 0.01348701 | 0.01475131 | 2.25578515 |
|             | Hs.542001   | Hs.542001    |    | 2 yz88g11.s1 Soares_multiple_  | 0.04061391 | 0.03727084 | 2.25573916 |
|             | Hs.583323   | Hs.583323    |    | 7 UI-CF-FN0-aew-k-13-0-UI.s1   | 0.04325921 | 0.03932004 | 2.25493365 |
|             | Hs.493947   | Hs.493947    |    | 9 Homo sapiens cDNA FLJ4145    | 0.04926837 | 0.04381075 | 2.25486557 |
| PISRT1      | NR_027070.1 | PISRT1       | 3  | Homo sapiens polled interse    | 0.02659627 | 0.02629064 | 2.25371271 |
| HSPA7       | NR_024151.1 | HSPA7        | 1  | Homo sapiens heat shock 70     | 0.04610539 | 0.04148587 | 2.24877187 |



## 5.0 ACL-Dependent Upreg

|             |             |             |    |                              |            |            |            |
|-------------|-------------|-------------|----|------------------------------|------------|------------|------------|
| LOC645478   | XM_932922.1 | LOC645478   | 16 | PREDICTED: Homo sapiens h    | 0.02472804 | 0.02477321 | 2.24831147 |
| LOC146053   | XM_933251.1 | LOC146053   | 15 | PREDICTED: Homo sapiens s    | 0.0370523  | 0.03456271 | 2.24544148 |
| SLC22A15    | NM_018420.1 | SLC22A15    | 1  | Homo sapiens FLIPT1; DKFZ    | 0.03400154 | 0.0321268  | 2.24367894 |
| OPHN1       | NM_002547.1 | OPHN1       | X  | Homo sapiens OPN1; MRX60     | 0.01659918 | 0.01758315 | 2.23869156 |
| FLJ43276    | NM_207382.1 | FLJ43276    | 15 | Homo sapiens FLJ43276 prot   | 0.00036203 | 0.00068726 | 2.23250852 |
| LOC10012955 | NR_024618.1 | LOC10012955 | 3  | Homo sapiens hypothetical L  | 0.00033371 | 0.00064281 | 2.22067389 |
| C8orf17     | NM_020237.1 | C8ORF17     | 8  | Homo sapiens MOST-1          | 0.01875243 | 0.01949222 | 2.21770618 |
|             | Hs.409403   | HS.409403   | 2  | xr75a07.x2 NCI_CGAP_Ov26     | 0.02188224 | 0.02226801 | 2.21740144 |
| OAZ3        | NM_016178.1 | OAZ3        | 1  | Homo sapiens TISP15; OAZ-1   | 0.02735921 | 0.02688729 | 2.21302537 |
| SLFN14      | NM_00112982 | SLFN14      | 17 | Homo sapiens schlafen famil  | 0.01807096 | 0.01889129 | 2.21007712 |
|             | Hs.564805   | HS.564805   | 15 | 602976638F1 NIH_MGC_12 l     | 0.00454167 | 0.00584119 | 2.20612788 |
| HOXB3       | NM_002146.3 | HOXB3       | 17 | Homo sapiens HOX2; HOX2G     | 0.03349557 | 0.03172389 | 2.20554181 |
| CASRL1      | XM_293581.5 | CASRL1      | 3  | PREDICTED: Homo sapiens c    | 0.02446392 | 0.02455347 | 2.20251375 |
| LOC651169   | XM_942515.1 | LOC651169   |    | PREDICTED: Homo sapiens h    | 0.02409413 | 0.02422112 | 2.20169069 |
| VPS54       | NM_016516.2 | VPS54       | 2  | Homo sapiens hVps54L; HCC    | 0.0237525  | 0.02391331 | 2.20156052 |
| LOC340274   | XR_017256.2 | LOC340274   | 7  | PREDICTED: Homo sapiens n    | 0.0267591  | 0.02641291 | 2.20106629 |
| CALHM1      | NM_00100141 | CALHM1      | 10 | Homo sapiens calcium homeo   | 0.01037326 | 0.01183857 | 2.19969767 |
| LOC644981   | XM_932554.1 | LOC644981   | X  | PREDICTED: Homo sapiens h    | 0.01647692 | 0.01747685 | 2.19883345 |
| FLJ90680    | NM_207475.1 | FLJ90680    | 22 | Homo sapiens FLJ90680 prot   | 0.05703915 | 0.04951143 | 2.19878739 |
| ALB         | NM_000477.3 | ALB         | 4  | Homo sapiens PRO1341; DKF    | 0.05462146 | 0.04775772 | 2.19831143 |
| LOC392364   | XM_928878.1 | LOC392364   | 9  | PREDICTED: Homo sapiens s    | 0.0138989  | 0.01512451 | 2.19554963 |
| SYCE2       | NM_00110557 | SYCE2       | 19 | Homo sapiens CESC1           | 0.04912078 | 0.04370608 | 2.19382388 |
| PHC3        | NM_024947.2 | PHC3        | 3  | Homo sapiens FLJ12729; HPI   | 0.00011958 | 0.00027581 | 2.19149786 |
| LOC644457   | XM_929445.1 | LOC644457   | 3  | PREDICTED: Homo sapiens h    | 0.04602031 | 0.04143056 | 2.18854448 |
|             | Hs.538859   | HS.538859   | 11 | HSU48640 Human fetal brair   | 0.02956029 | 0.02866195 | 2.1857295  |
|             | Hs.201858   | HS.201858   | 3  | BX097814 Soares_NFL_T_GE     | 0.05456086 | 0.04770949 | 2.1838544  |
| KCNH4       | NM_012285.1 | KCNH4       | 17 | Homo sapiens Kv12.3; ELK1;   | 0.01361637 | 0.01486685 | 2.1823626  |
| LOC147645   | XM_937000.1 | LOC147645   |    | PREDICTED: Homo sapiens h    | 0.05337741 | 0.04681929 | 2.1803202  |
| C4orf10     | NR_015453.1 | C4ORF10     | 4  | Homo sapiens chromosome 4    | 0.03265662 | 0.03107692 | 2.17689385 |
| LOC10013345 | XM_00172005 | LOC10013345 |    | PREDICTED: Homo sapiens h    | 0.03853296 | 0.03572738 | 2.17328996 |
|             | Hs.144714   | HS.144714   | 10 | BX095676 Soares_testis_NH    | 0.02731389 | 0.02684876 | 2.17033371 |
| CFC1        | NM_032545.2 | CFC1        | 2  | Homo sapiens CRYPTIC; MGC    | 0.00318536 | 0.0043057  | 2.16907563 |
| GPR89C      | XM_936805.1 | GPR89C      | 1  | Homo sapiens G protein-coupl | 0.00225833 | 0.00321509 | 2.15978454 |
|             | Hs.552282   | HS.552282   | 8  | Homo sapiens mRNA; cDNA l    | 0.02167525 | 0.02208811 | 2.15835627 |
| ZNF502      | NM_033210.3 | ZNF502      | 3  | Homo sapiens FLJ14855; FLJ   | 0.05703377 | 0.04951166 | 2.15448741 |
| LOC642744   | XM_926179.1 | LOC642744   | 14 | PREDICTED: Homo sapiens s    | 0.00269965 | 0.00372784 | 2.15086391 |
| TEP1        | NM_007110.3 | TEP1        | 14 | Homo sapiens VAULT2; TLP1    | 0.05108581 | 0.04512503 | 2.15043655 |
| ANKZF1      | NM_018089.1 | ANKZF1      | 2  | Homo sapiens ZNF744; FLJ1    | 0.00017226 | 0.00037209 | 2.1464585  |
| LOC646334   | XM_929268.1 | LOC646334   | 3  | PREDICTED: Homo sapiens s    | 0.00027018 | 0.00053766 | 2.14596915 |
| LOC642183   | XM_936339.1 | LOC642183   |    | PREDICTED: Homo sapiens s    | 0.04174454 | 0.0381647  | 2.14434791 |
|             | Hs.538716   | HS.538716   | 11 | ob56a07.s1 NCI_CGAP_GCB      | 0.00269167 | 0.00371859 | 2.13376846 |
| CD207       | NM_015717.1 | CD207       | 2  | Homo sapiens CLEC4K; LANC    | 0.01241054 | 0.01375396 | 2.13339537 |
|             | Hs.516049   | HS.516049   | 2  | ho44f09.x1 Soares_NFL_T_G    | 0.04616807 | 0.04152523 | 2.13123471 |
| LOC153328   | NM_145282.1 | LOC153328   | 5  | Homo sapiens similar to CG4  | 0.03114266 | 0.02987598 | 2.13105179 |
| MARK1       | NM_018650.2 | MARK1       | 1  | Homo sapiens KIAA1477; MGC   | 0.02519777 | 0.02513761 | 2.12710514 |
| LIMK1       | NM_002314.2 | LIMK1       | 7  | Homo sapiens LIMK            | 0.04833233 | 0.04315334 | 2.12489255 |
| C7orf54     | NM_014411.2 | C7ORF54     | 7  | Homo sapiens NSG-X; NAG8;    | 0.00060957 | 0.00106055 | 2.11908648 |
| TEKT2       | NM_014466.2 | TEKT2       | 1  | Homo sapiens h-tektin-t; TEL | 0.03236846 | 0.03086295 | 2.11002194 |
|             | Hs.584144   | HS.584144   | 9  | ty82e09.x1 NCI_CGAP_Kid1     | 0.04487478 | 0.04057831 | 2.10939277 |
| ATP6V1G2    | NM_130463.2 | ATP6V1G2    | 6  | Homo sapiens NG38; ATP6G     | 0.00093734 | 0.00152216 | 2.10636272 |
| LOC440491   | XM_498696.2 | LOC440491   |    | PREDICTED: Homo sapiens h    | 0.04013238 | 0.03693324 | 2.10612585 |
| LOC285908   | NM_181722.2 | LOC285908   | 7  | Homo sapiens hypothetical p  | 0.00226402 | 0.0032211  | 2.08996021 |
| BATF3       | NM_018664.1 | BATF3       | 1  | Homo sapiens JUNDM1; SNF     | 0.05112665 | 0.04515201 | 2.08757805 |
| C2orf89     | NM_00108082 | C2ORF89     | 2  | Homo sapiens FLJ46467        | 0.0059502  | 0.00738118 | 2.08492504 |
| LOC643313   | XM_933038.1 | LOC643313   | 1  | PREDICTED: Homo sapiens s    | 0.03819814 | 0.03546942 | 2.0798921  |
| U1SNRNPBP   | NM_180703.1 | U1SNRNPBP   | 12 | Homo sapiens MGC138160; l    | 0.0001176  | 0.0002724  | 2.07818525 |
| SEMA4A      | NM_022367.2 | SEMA4A      | 1  | Homo sapiens RP11-54H19.2    | 0.01398349 | 0.01519771 | 2.07410966 |
| LOC10012885 | XR_038035.1 | LOC10012885 | 2  | PREDICTED: Homo sapiens n    | 0.01114099 | 0.01256925 | 2.07295977 |
| DCAF10      | NM_024345.3 | DCAF10      | 9  | Homo sapiens MGC131781; l    | 0.0006398  | 0.00110395 | 2.07195484 |
| LOC646825   | XM_929783.1 | LOC646825   | 19 | PREDICTED: Homo sapiens s    | 0.04026766 | 0.03701503 | 2.05846432 |
| ZNF707      | NM_173831.2 | ZNF707      | 8  | Homo sapiens zinc finger pro | 0.00786688 | 0.00934778 | 2.05593287 |
| TNS1        | NM_022648.3 | TNS1        | 2  | Homo sapiens TNS; MGC885     | 0.02808948 | 0.02747265 | 2.0501462  |
| LOC728670   | XM_932235.1 | LOC728670   | 12 | PREDICTED: Homo sapiens s    | 0.04945945 | 0.04394504 | 2.04425688 |
|             | Hs.539159   | HS.539159   | 12 | wm19e03.x1 NCI_CGAP_Ut4      | 0.0148081  | 0.0159497  | 2.04206094 |
| LOC388255   | XM_370973.3 | LOC388255   | 16 | PREDICTED: Homo sapiens s    | 0.03966791 | 0.03659407 | 2.03769546 |
| LOC727726   | XM_937616.1 | LOC727726   | 10 | PREDICTED: Homo sapiens s    | 0.01821353 | 0.01901314 | 2.03739572 |
| SH3BP2      | NM_003023.2 | SH3BP2      | 4  | Homo sapiens CRPM; CRBM;     | 0.00356728 | 0.00474592 | 2.03657098 |
| CCDC22      | NM_014008.1 | CCDC22      | X  | Homo sapiens JM1; CXorf37    | 0.00317329 | 0.00429138 | 2.03293011 |
| BLOC1S2     | NM_00100134 | BLOC1S2     | 10 | Homo sapiens RP11-316M21     | 0.03270974 | 0.0311106  | 2.03245879 |
| FZD3        | NM_017412.2 | FZD3        | 8  | Homo sapiens hFz3; Fz-3      | 0.03466103 | 0.03267253 | 2.02462063 |

## 5.0 ACL-Dependent Upreg

|             |             |              |    |                            |                  |            |            |            |
|-------------|-------------|--------------|----|----------------------------|------------------|------------|------------|------------|
| CRBN        | NM_016302.2 | CRBN         | 3  | Homo sapiens               | MGC27358; D      | 7.8924E-07 | 5.6436E-06 | 2.02345241 |
| LOC10012942 | XM_00171488 | LOC10012942  | 7  | PREDICTED: Homo sapiens    | h                | 0.03763017 | 0.03503471 | 2.02229834 |
| LOC645836   | XM_928820.1 | LOC645836    | 8  | PREDICTED: Homo sapiens    | s                | 0.00656366 | 0.00802194 | 2.0216774  |
| LOC650494   | XM_944224.1 | LOC650494    |    | PREDICTED: Homo sapiens    | h                | 0.05073388 | 0.04484125 | 2.01619277 |
| FAM134C     | NM_178126.2 | FAM134C      | 17 | Homo sapiens               | FLJ33806         | 0.00578781 | 0.00720418 | 2.0146562  |
| LOC648972   | XM_938049.1 | LOC648972    |    | PREDICTED: Homo sapiens    | s                | 0.05026331 | 0.04449256 | 2.01345508 |
| LOC650140   | XM_942374.1 | LOC650140    |    | PREDICTED: Homo sapiens    | h                | 0.04680654 | 0.04199188 | 2.01109506 |
| LOC651315   | XM_940450.1 | LOC651315    |    | PREDICTED: Homo sapiens    | s                | 0.03583105 | 0.0336201  | 2.00553409 |
| SEC14L2     | NM_012429.1 | SEC14L2      | 22 | Homo sapiens               | KIAA1658; MC     | 0.00432827 | 0.00560121 | 1.99287681 |
| LOC652404   | XM_945472.1 | LOC652404    |    | PREDICTED: Homo sapiens    | h                | 0.00422686 | 0.00549592 | 1.98927503 |
| CLVS2       | NM_00101085 | CLVS2        | 6  | Homo sapiens               | C6orf213; C6c    | 0.04613039 | 0.04149985 | 1.98494308 |
|             | Hs.197017   | HS.197017    | 8  | wa17h04.x1                 | NCI_CGAP_Kid1    | 0.02942552 | 0.02854389 | 1.98278656 |
| LOC643937   | XM_927195.1 | LOC643937    | 9  | PREDICTED: Homo sapiens    | h                | 0.05431378 | 0.04754555 | 1.97938346 |
| ACSM2B      | NM_182617.2 | ACSM2B       | 16 | Homo sapiens               | HYST1046; H      | 0.01475607 | 0.01590538 | 1.97239827 |
| EPHX1       | NM_000120.2 | EPHX1        | 1  | Homo sapiens               | EPOX; MEH; E     | 2.4627E-05 | 7.7363E-05 | 1.97121476 |
| PHF8        | NM_015107.1 | PHF8         |    | Homo sapiens               | ZNF422; MRX      | 0.01570807 | 0.01676674 | 1.96553086 |
|             | Hs.526484   | HS.526484    | 15 | UI-CF-EN1-ael-m-17-18-UI.s |                  | 0.05434957 | 0.0475674  | 1.96546698 |
| KIAA1545    | XM_495939.2 | KIAA1545     | 12 | PREDICTED: Homo sapiens    | K                | 0.00792899 | 0.00941266 | 1.96540796 |
| LOC652773   | XM_942415.1 | LOC652773    |    | PREDICTED: Homo sapiens    | s                | 0.02711162 | 0.02668582 | 1.9620027  |
| LOC642468   | XM_931123.1 | LOC642468    | 4  | PREDICTED: Homo sapiens    | h                | 0.04502418 | 0.04070082 | 1.96073148 |
| RAD51L3     | NM_002878.2 | RAD51L3      | 17 | Homo sapiens               | R51H3; Trad;     | 0.00248611 | 0.00348063 | 1.96019093 |
| LOC441086   | XM_499003.2 | LOC441086    | 5  | PREDICTED: Homo sapiens    | h                | 0.02908065 | 0.02826247 | 1.95897757 |
| ANKRD21     | NM_174981.2 | ANKRD21      | 21 | Homo sapiens               | POTE-21; POT     | 0.02082687 | 0.02134505 | 1.95703244 |
| LOC651881   | XM_942713.1 | LOC651881    |    | PREDICTED: Homo sapiens    | h                | 0.01046933 | 0.01193114 | 1.95171305 |
| MGC12760    | XM_930480.1 | MGC12760     | 1  | PREDICTED: Homo sapiens    | h                | 0.04759048 | 0.04259936 | 1.95128764 |
| LOC401305   | XM_376573.3 | LOC401305    | 7  | PREDICTED: Homo sapiens    | s                | 0.00068246 | 0.00116405 | 1.94006432 |
| LOC651113   | XM_942507.1 | LOC651113    |    | PREDICTED: Homo sapiens    | h                | 0.04508692 | 0.04074074 | 1.93639123 |
| LOC641765   | XM_927822.1 | LOC641765    | 7  | PREDICTED: Homo sapiens    | s                | 0.01922969 | 0.01992692 | 1.93560239 |
|             | Hs.583755   | HS.583755    | 8  | Homo sapiens               | cDNA FLJ3105     | 0.04714016 | 0.04226094 | 1.93298672 |
| LOC730286   | XR_038094.1 | LOC730286    | 7  | PREDICTED: Homo sapiens    | n                | 0.00188507 | 0.00275338 | 1.93185723 |
| KLHL1       | NM_020866.1 | KLHL1        | 13 | Homo sapiens               | MRP2; KIAA14     | 0.05297729 | 0.04648692 | 1.93184671 |
| THAP4       | NM_015963.4 | THAP4        | 2  | Homo sapiens               | CGI-36           | 0.00039411 | 0.00073918 | 1.93006419 |
| ZNF215      | NM_013250.1 | ZNF215       | 11 | Homo sapiens               | BAZ2             | 0.00051563 | 0.0009233  | 1.9206771  |
| UNC13A      | XM_937931.1 | UNC13A       |    | PREDICTED: Homo sapiens    | u                | 0.00832196 | 0.00982202 | 1.91518577 |
| CEP76       | NM_024899.2 | CEP76        | 18 | Homo sapiens               | C18orf9; FLJ1    | 0.00723926 | 0.00870696 | 1.9151486  |
| LOC651137   | XM_945836.1 | LOC651137    |    | PREDICTED: Homo sapiens    | s                | 0.03567771 | 0.03349773 | 1.90562748 |
| LOC728070   | XM_926169.1 | LOC728070    | 16 | PREDICTED: Homo sapiens    | s                | 0.03759142 | 0.03500978 | 1.90477138 |
| LOC646307   | XM_929245.1 | LOC646307    | 1  | PREDICTED: Homo sapiens    | h                | 0.02169116 | 0.02209919 | 1.9024811  |
| C7orf29     | NM_138434.2 | C7ORF29      | 7  | Homo sapiens               | chromosome 7     | 0.04478726 | 0.04052005 | 1.90156204 |
| SLC26A2     | NM_000112.2 | SLC26A2      | 5  | Homo sapiens               | DTDST; MSTP:     | 0.00072771 | 0.00122882 | 1.90063575 |
| SELE        | NM_000450.1 | SELE         | 1  | Homo sapiens               | LECAM2; ESEL     | 0.02053729 | 0.02108274 | 1.89997429 |
|             | Hs.443534   | HS.443534    | 4  | BX117171                   | NCI_CGAP_Co3 H   | 0.03720706 | 0.03469232 | 1.89993085 |
| LOC652541   | XM_942032.1 | LOC652541    |    | PREDICTED: Homo sapiens    | h                | 0.00770858 | 0.00918331 | 1.89803229 |
| NCRNA00094  | NR_015427.1 | NCRNA00094   |    | Homo sapiens               | non-protein cc   | 0.02776323 | 0.02721727 | 1.89454939 |
|             | Hs.444939   | HS.444939    | 1  | AV744922                   | CB Homo sapiens  | 0.004359   | 0.0056335  | 1.89398636 |
| LOC645113   | XM_930333.1 | LOC645113    | 22 | PREDICTED: Homo sapiens    | h                | 0.03658477 | 0.03419931 | 1.89211639 |
| FLJ30092    | XM_933560.1 | FLJ30092     | 12 | PREDICTED: Homo sapiens    | A                | 0.04027025 | 0.03701353 | 1.89207629 |
| LOC654115   | XM_939598.1 | LOC654115    |    | PREDICTED: Homo sapiens    | s                | 0.03312829 | 0.03142353 | 1.89117114 |
| LOC10013150 | XR_038156.1 | LOC100131507 |    | PREDICTED: Homo sapiens    | n                | 0.02294435 | 0.0232169  | 1.89097324 |
| CPXM1       | NM_019609.3 | CPXM1        | 20 | Homo sapiens               | CPX1; CPXM       | 0.02539273 | 0.02528897 | 1.88648652 |
| ZNF292      | XM_943726.1 | ZNF292       | 6  | Homo sapiens               | bA39312.3; KI    | 0.0246312  | 0.02469876 | 1.88632386 |
| LOC650028   | XM_939119.1 | LOC650028    |    | PREDICTED: Homo sapiens    | s                | 0.02801824 | 0.02742437 | 1.88298078 |
| SULT6B1     | NM_00103237 | SULT6B1      | 2  | Homo sapiens               | sulfotransferase | 0.01737102 | 0.01830351 | 1.88131443 |
| GNRH1       | NM_000825.2 | GNRH1        | 8  | Homo sapiens               | LHRH; LNRH;      | 0.04088599 | 0.03750091 | 1.87978881 |
| DCD         | NM_053283.1 | DCD          | 12 | Homo sapiens               | MGC71930; D      | 0.02933098 | 0.02846163 | 1.87827962 |
| NIT1        | NM_005600.1 | NIT1         | 1  | Homo sapiens               | MGC57670         | 0.02799152 | 0.02740433 | 1.87792449 |
|             | Hs.540255   | HS.540255    | 15 | DB299844                   | BRACE3 Homo sap  | 0.03915389 | 0.036196   | 1.87329577 |
| LOC651617   | XM_940799.1 | LOC651617    |    | PREDICTED: Homo sapiens    | s                | 0.0492771  | 0.04381408 | 1.87249943 |
| MIR614      | NR_030345.1 | MIR614       |    | Homo sapiens               | microRNA 614     | 0.00149729 | 0.00226504 | 1.87062951 |
| SPTLC2      | NM_004863.2 | SPTLC2       | 14 | Homo sapiens               | SPT2; KIAA05     | 0.03277659 | 0.03116067 | 1.86926718 |
| GBP4        | NM_052941.2 | GBP4         | 1  | Homo sapiens               | Mpa2             | 0.04719944 | 0.04230111 | 1.8691309  |
|             | Hs.224854   | HS.224854    | 12 | UI-H-EU0-azt-h-09-0-UI.s1  | N                | 0.02875244 | 0.02798379 | 1.86666695 |
| ZNF155      | NM_198089.1 | ZNF155       | 19 | Homo sapiens               | MGC161655; j     | 0.0527372  | 0.0463133  | 1.86592476 |
| CPT1B       | NM_152247.1 | CPT1B        |    | Homo sapiens               | CPT1-M; KIAA     | 0.00427874 | 0.0055494  | 1.86555622 |
| C15orf32    | NM_153040.1 | C15ORF32     | 15 | Homo sapiens               | FLJ32831; MG     | 0.0194376  | 0.02011149 | 1.85852652 |
| LOC400509   | XM_942431.1 | LOC400509    |    | PREDICTED: Homo sapiens    | s                | 0.05124026 | 0.04523414 | 1.85815099 |
| MGC22014    | XM_942026.1 | MGC22014     |    | PREDICTED: Homo sapiens    | h                | 0.01352228 | 0.01478068 | 1.85493099 |
|             | Hs.540722   | HS.540722    | 17 | ti70d10.x1                 | NCI_CGAP_Kid11   | 0.01021662 | 0.01168109 | 1.85406207 |
| LOC647920   | XM_943115.1 | LOC647920    |    | PREDICTED: Homo sapiens    | h                | 0.04213908 | 0.03847729 | 1.85064714 |
| WDFY3       | NM_178583.1 | WDFY3        | 4  | Homo sapiens               | ALFY; KIAA09     | 0.01818589 | 0.01900012 | 1.84411604 |

## 5.0 ACL-Dependent Upreg

|             |             |              |                                 |            |            |            |
|-------------|-------------|--------------|---------------------------------|------------|------------|------------|
| FLJ25169    | NM_152568.1 | FLJ25169     | 8 Homo sapiens hypothetical p   | 0.03984502 | 0.03671885 | 1.83927664 |
| FBXW2       | NM_012164.2 | FBXW2        | 9 Homo sapiens FBW2; Fwd2;      | 0.00055021 | 0.00097645 | 1.83661898 |
| PIK3R4      | NM_014602.1 | PIK3R4       | 3 Homo sapiens MGC102700; I     | 0.04560075 | 0.04115842 | 1.83549627 |
| KDM6B       | NM_00108042 | KDM6B        | 17 Homo sapiens KIAA0346        | 0.04718088 | 0.04228879 | 1.8353512  |
| GEN1        | NM_182625.2 | GEN1         | 2 Homo sapiens FLJ40869; DK     | 0.01550153 | 0.01658866 | 1.83290452 |
| P76         | NM_173542.2 | P76          | 12 Homo sapiens mannose-6-ph    | 0.02718795 | 0.02675194 | 1.82944999 |
|             | Hs.171169   | HS.171169    | 8 AGENCOURT_13640441 NIH        | 0.02964106 | 0.0287244  | 1.82941974 |
| LOC283514   | NM_198849.1 | LOC283514    | 13 Homo sapiens similar to seve | 0.05603399 | 0.04880308 | 1.82721749 |
| CD2         | NM_001767.2 | CD2          | 1 Homo sapiens SRBC; T11        | 0.03636319 | 0.03402118 | 1.82673823 |
|             | Hs.545589   | HS.545589    | Human small nuclear RNA U6      | 0.0373925  | 0.03484301 | 1.82606229 |
|             | Hs.540335   | HS.540335    | 15 UI-H-ED1-axx-k-12-0-UI.s1 I  | 0.00199704 | 0.00289    | 1.82104365 |
| CHTF8       | NM_00100284 | CHTF8        | 16 Homo sapiens FLJ20400; DEI   | 0.01990303 | 0.0205277  | 1.81962574 |
| ZNF519      | XM_940357.1 | ZNF519       | PREDICTED: Homo sapiens z       | 0.04562427 | 0.04116694 | 1.81890116 |
| TRIM60      | NM_152620.2 | TRIM60       | 4 Homo sapiens RNF33; RNF12     | 0.00644199 | 0.00789414 | 1.81727515 |
| CEP170      | NM_014812.1 | CEP170       | 1 Homo sapiens FAM68A; KAB;     | 0.02448263 | 0.02456663 | 1.81585023 |
| CORO2B      | NM_006091.1 | CORO2B       | 15 Homo sapiens KIAA0925; CL    | 0.0362308  | 0.03392264 | 1.8058752  |
| CYP2C18     | NM_000772.1 | CYP2C18      | 10 Homo sapiens CYP2C17; DKF    | 0.03473916 | 0.03273562 | 1.80573199 |
| MUC6        | XM_939286.1 | MUC6         | 11 Homo sapiens MUC6 mucin      | 0.00415104 | 0.00541822 | 1.8020731  |
| MED23       | NM_015979.2 | MED23        | 6 Homo sapiens MED23; DKFZ      | 0.00086001 | 0.00141412 | 1.79914697 |
| EPB41L1     | NM_177996.1 | EPB41L1      | 20 Homo sapiens KIAA0338; 4.1   | 0.01747274 | 0.01839302 | 1.79886778 |
|             | Hs.401073   | HS.401073    | 5 UI-H-FL1-bgw-g-15-0-UI.s1 I   | 0.02730782 | 0.02684581 | 1.79519641 |
| ACVR1C      | NM_145259.1 | ACVR1C       | 2 Homo sapiens ACVRLK7; ALK     | 0.02905351 | 0.02823922 | 1.78724616 |
| SIL1        | NM_00103763 | SIL1         | 5 Homo sapiens MSS; BAP; UL     | 3.193E-06  | 1.5909E-05 | 1.78590075 |
| TRAPPC6A    | NM_024108.1 | TRAPPC6A     | 19 Homo sapiens MGC2650; TR     | 0.00143708 | 0.00218943 | 1.78284679 |
| LOC131691   | XM_00172197 | LOC131691    | PREDICTED: Homo sapiens s       | 0.02592155 | 0.02570185 | 1.78172206 |
| DDX49       | NM_019070.3 | DDX49        | 19 Homo sapiens FLJ10432; R2    | 0.00153734 | 0.00231485 | 1.77165307 |
| OR8J3       | NM_00100406 | OR8J3        | 11 Homo sapiens OR11-173        | 0.00331319 | 0.00445379 | 1.76681058 |
| SPG20       | NM_015087.3 | SPG20        | 13 Homo sapiens TAHCCP1; KIA    | 0.03703608 | 0.03455493 | 1.76508119 |
| LYRM5       | NM_00100166 | LYRM5        | 12 Homo sapiens LYR motif cont  | 0.00026549 | 0.00053109 | 1.76200918 |
| WDFY4       | NM_020945.1 | WDFY4        | 10 Homo sapiens WDFY family r   | 0.0384725  | 0.03569018 | 1.75826248 |
| LOC654069   | XM_945683.1 | LOC654069    | PREDICTED: Homo sapiens s       | 0.00100642 | 0.00161639 | 1.75546061 |
| C6          | NM_000065.1 | C6           | 5 Homo sapiens complement c     | 0.05263242 | 0.04623517 | 1.75476199 |
| CLEC4E      | NM_014358.1 | CLEC4E       | 12 Homo sapiens CLECSF9; MIN    | 0.03441041 | 0.03247117 | 1.7537305  |
| LOC652353   | XM_941781.1 | LOC652353    | PREDICTED: Homo sapiens s       | 0.05536544 | 0.04830712 | 1.75258786 |
| TBC1D13     | NM_018201.2 | TBC1D13      | 9 Homo sapiens RP11-545E17.     | 0.00968297 | 0.01116845 | 1.74843295 |
| AMDHD2      | NM_015944.2 | AMDHD2       | 16 Homo sapiens CGI-14          | 0.00282364 | 0.00387225 | 1.7465431  |
| CA4         | NM_000717.2 | CA4          | 17 Homo sapiens Car4; CAIV; R   | 0.03341735 | 0.0316669  | 1.73713059 |
| ZNF75D      | NM_007131.2 | ZNF75D       | Homo sapiens MGC126327; ;       | 0.02679427 | 0.0264387  | 1.73413913 |
| LOC10013023 | XR_038429.1 | LOC100130233 | PREDICTED: Homo sapiens n       | 0.02691553 | 0.02653149 | 1.73121745 |
| TBKBP1      | NM_014726.1 | TBKBP1       | 17 Homo sapiens ProSAPiP2; KI   | 0.02172951 | 0.02212798 | 1.73035614 |
|             | Hs.445277   | HS.445277    | 2 UI-H-EZ1-bcb-b-23-0-UI.s1 I   | 0.04967211 | 0.04407596 | 1.72240388 |
| DGCR11      | NR_024157.1 | DGCR11       | 22 Homo sapiens DiGeorge sync   | 0.02872314 | 0.02796458 | 1.71745349 |
| KIAA0527    | XM_940465.1 | KIAA0527     | PREDICTED: Homo sapiens K       | 0.00882646 | 0.01032716 | 1.71376665 |
| LOC647876   | XM_943078.1 | LOC647876    | PREDICTED: Homo sapiens h       | 0.04167068 | 0.03810511 | 1.71241901 |
| LOC727732   | NM_031862.1 | LOC727732    | 17 PREDICTED: Homo sapiens s    | 0.04883018 | 0.04350046 | 1.70859636 |
| MLLT1       | NM_005934.2 | MLLT1        | 19 Homo sapiens ENL; YEATS1;    | 0.04503998 | 0.04070672 | 1.70858005 |
|             | Hs.550285   | HS.550285    | 12 7i71a09.y1 NCI_CGAP_Brn2(    | 0.03863532 | 0.03579581 | 1.70402548 |
| UBE2S       | NM_014501.2 | UBE2S        | 19 Homo sapiens E2EPF; E2-EPF   | 0.04517082 | 0.04080395 | 1.69004552 |
| USP14       | NM_00103733 | USP14        | 18 Homo sapiens TGT             | 0.00105842 | 0.00168939 | 1.68613425 |
| FBXW5       | NM_178226.1 | FBXW5        | 9 Homo sapiens RP11-229P13.     | 0.0274276  | 0.02694545 | 1.67927565 |
| YJEFN3      | NM_198537.1 | YJEFN3       | 19 Homo sapiens MGC138490       | 0.04562448 | 0.0411629  | 1.67867055 |
| EFCAB4A     | NM_173584.2 | EFCAB4A      | 11 Homo sapiens MGC45840; FI    | 0.04587419 | 0.04132445 | 1.678475   |
| LOC646048   | XR_017059.2 | LOC646048    | 19 PREDICTED: Homo sapiens s    | 0.04016633 | 0.03694898 | 1.67114252 |
| HINFP       | NM_015517.3 | HINFP        | 11 Homo sapiens ZNF743; HINF    | 0.00195442 | 0.00284002 | 1.66698561 |
| LOC10012947 | XM_00172325 | LOC100129478 | PREDICTED: Homo sapiens h       | 0.02807265 | 0.0274715  | 1.66593168 |
| REV3L       | NM_002912.1 | REV3L        | 6 Homo sapiens POLZ; REV3       | 0.02781776 | 0.02726464 | 1.66426596 |
| INPP5K      | NM_130766.2 | INPP5K       | 17 Homo sapiens inositol polyph | 0.0283302  | 0.02764952 | 1.66348376 |
| SPNS3       | NM_182538.3 | SPNS3        | 17 Homo sapiens MGC29671        | 0.05018784 | 0.04444817 | 1.6620928  |
| LOC10013432 | XM_00171382 | LOC100134329 | PREDICTED: Homo sapiens h       | 0.04817389 | 0.04303815 | 1.65800009 |
| ZFAND3      | NM_021943.1 | ZFAND3       | 6 Homo sapiens FLJ13222; TE)    | 0.00241603 | 0.00340151 | 1.65604744 |
| DKFZP434L18 | XM_496054.2 | DKFZP434L18  | 15 PREDICTED: Homo sapiens C    | 0.04611615 | 0.0414913  | 1.65263614 |
| FLJ39739    | XM_936515.1 | FLJ39739     | PREDICTED: Homo sapiens F       | 0.01058991 | 0.01205291 | 1.65066422 |
| TRAPPC6B    | NM_00107953 | TRAPPC6B     | 14 Homo sapiens trafficking pro | 8.1181E-06 | 3.2244E-05 | 1.64730997 |
|             | Hs.566740   | HS.566740    | UI-H-BW1-anr-b-09-0-UI.s1       | 0.03878766 | 0.03591041 | 1.64464648 |
| PGAP3       | NM_033419.3 | PGAP3        | 17 Homo sapiens CAB2; AGLA5     | 0.03589705 | 0.03366403 | 1.63967203 |
| BLCAP       | NM_006698.2 | BLCAP        | 20 Homo sapiens BC10            | 5.4322E-05 | 0.00014611 | 1.63330773 |
| LOC642856   | XM_926250.1 | LOC642856    | PREDICTED: Homo sapiens h       | 0.04375424 | 0.03972061 | 1.62413966 |
| SLC35A2     | NM_00103228 | SLC35A2      | Homo sapiens UGALT; UGT2;       | 2.007E-05  | 6.6127E-05 | 1.61809652 |
| AGER        | NM_001136.3 | AGER         | 6 Homo sapiens MGC22357; R      | 0.02146237 | 0.02191189 | 1.61628244 |
| LOC10012953 | XR_037837.1 | LOC100129539 | PREDICTED: Homo sapiens n       | 0.02031966 | 0.020896   | 1.61450014 |

## 5.0 ACL-Dependent Upreg

|             |             |             |    |                               |            |            |            |
|-------------|-------------|-------------|----|-------------------------------|------------|------------|------------|
| LOC730262   | XM_371302.3 | LOC730262   | 1  | PREDICTED: Homo sapiens s     | 0.00440553 | 0.00568526 | 1.60755197 |
| CCDC40      | XM_934511.1 | CCDC40      | 17 | PREDICTED: Homo sapiens c     | 0.02241805 | 0.02274467 | 1.60161433 |
| LAMA2       | NM_000426.3 | LAMA2       | 6  | Homo sapiens LAMM             | 0.02496745 | 0.02495607 | 1.59667485 |
| UNKL        | NM_00103712 | UNKL        | 16 | Homo sapiens MGCS179; ZC      | 0.05072596 | 0.04483876 | 1.59437981 |
| LOC644624   | XM_934133.1 | LOC644624   | 4  | PREDICTED: Homo sapiens h     | 0.00256819 | 0.00357501 | 1.59096221 |
| CCDC71      | NM_022903.2 | CCDC71      | 3  | Homo sapiens FLJ13629; FLJ    | 0.00439008 | 0.005667   | 1.59025374 |
| RNU6ATAC    | NR_023344.1 | RNU6ATAC    | 9  | Homo sapiens RNA, U6atac s    | 0.02670162 | 0.02636507 | 1.58813161 |
| IL2RA       | NM_000417.1 | IL2RA       | 10 | Homo sapiens CD25; IL2R; I    | 0.05707241 | 0.0495305  | 1.58627632 |
|             | Hs.580000   | HS.580000   | 2  | ho33b03.x1 NCI_CGAP_Lu24      | 0.04949363 | 0.0439576  | 1.58187643 |
|             | Hs.534809   | HS.534809   | 7  | TC121268 Human fetal brain    | 0.04680003 | 0.04199033 | 1.58074253 |
| ARHGAP23    | XM_930977.1 | ARHGAP23    | 17 | PREDICTED: Homo sapiens R     | 0.0047312  | 0.00605301 | 1.57899684 |
| PATE2       | NM_212555.1 | PATE2       | 11 | Homo sapiens UNQ3112          | 0.00460359 | 0.0059113  | 1.57759702 |
| GCDH        | NM_013976.2 | GCDH        | 19 | Homo sapiens GCD; ACAD5       | 0.00574161 | 0.00715479 | 1.57439259 |
| KLHL18      | NM_025010.2 | KLHL18      | 3  | Homo sapiens FLJ13703; KIA    | 0.00507364 | 0.00643111 | 1.57236817 |
| VAC14       | NM_018052.3 | VAC14       |    | PREDICTED: Homo sapiens V     | 0.01843866 | 0.01921159 | 1.57193786 |
| LOC642602   | XM_926081.1 | LOC642602   | 8  | PREDICTED: Homo sapiens s     | 0.04665646 | 0.04189151 | 1.56785625 |
| ALOX15      | NM_001140.3 | ALOX15      | 17 | Homo sapiens 15-LOX2          | 0.00494673 | 0.00628932 | 1.56566842 |
| FCAMR       | NM_032029.2 | FCAMR       |    | Homo sapiens FCA/MR; FKSC     | 0.02652811 | 0.02623804 | 1.56236774 |
| TAS1R2      | NM_152232.1 | TAS1R2      | 1  | Homo sapiens T1R2; GPR71;     | 0.04825829 | 0.04310039 | 1.56102972 |
| NSUN5B      | NM_148980.1 | NSUN5B      | 7  | Homo sapiens WBSCR20B; GPR    | 9.0121E-06 | 3.4957E-05 | 1.55908775 |
| CD200R1     | NM_138940.2 | CD200R1     | 3  | Homo sapiens HCRTR2; CD20     | 0.04282695 | 0.03899176 | 1.55635985 |
| SCARNA14    | NR_004388.1 | SCARNA14    | 15 | Homo sapiens U100             | 4.5643E-05 | 0.00012693 | 1.55237521 |
| JAGN1       | NM_032492.3 | JAGN1       | 3  | Homo sapiens jagunal homol    | 0.02449414 | 0.02457536 | 1.55110378 |
| OPN5        | NM_181744.2 | OPN5        | 6  | Homo sapiens PGR12; TMEM      | 0.04870712 | 0.0434261  | 1.5485414  |
| AYP1p1      | XR_001434.1 | AYP1P1      |    | PREDICTED: Homo sapiens A     | 0.00123088 | 0.00192063 | 1.54805442 |
| LOC728452   | XM_932756.1 | LOC728452   | 5  | PREDICTED: Homo sapiens s     | 0.04202297 | 0.03839125 | 1.54365736 |
|             | Hs.576292   | HS.576292   | 1  | 602658226F2 NCI_CGAP_Sk       | 0.03670206 | 0.03427974 | 1.54254998 |
| FUBP1       | NM_003902.3 | FUBP1       | 1  | Homo sapiens FBP; FUBP        | 0.03349159 | 0.03172355 | 1.53881777 |
| LOC440225   | XR_042392.1 | LOC440225   |    | PREDICTED: Homo sapiens n     | 0.00415681 | 0.00542171 | 1.53643979 |
| RAB15       | NM_198686.1 | RAB15       | 14 | Homo sapiens RAB15, memb      | 0.02272957 | 0.02302081 | 1.5359365  |
| LOC641772   | XM_935895.1 | LOC641772   |    | PREDICTED: Homo sapiens h     | 0.05128761 | 0.04526682 | 1.53347607 |
|             | Hs.560357   | HS.560357   |    | te46f04.x1 Soares_NhHMPu      | 0.04965741 | 0.04406737 | 1.53345098 |
| AFF1        | NM_005935.1 | AFF1        | 4  | Homo sapiens MLLT2; MGC1      | 0.04965218 | 0.04406719 | 1.53287097 |
| GTF2E1      | NM_005513.1 | GTF2E1      | 3  | Homo sapiens TFIIE-A; FE      | 0.00026887 | 0.00053566 | 1.5323097  |
| SLC48A1     | NM_017842.2 | SLC48A1     | 12 | Homo sapiens solute carrier f | 0.01207061 | 0.01344516 | 1.52692385 |
| KRT23       | NM_015515.3 | KRT23       | 17 | Homo sapiens MGC26158; Cl     | 0.02116478 | 0.0216408  | 1.52418451 |
| TBC1D3G     | NM_00104028 | TBC1D3G     | 17 | Homo sapiens TBC1 domain i    | 0.00405408 | 0.00531299 | 1.52028098 |
| LOC642897   | NM_182749.1 | LOC642897   | 11 | PREDICTED: Homo sapiens n     | 0.00121055 | 0.00189396 | 1.51594157 |
| SSSCA1      | NM_006396.1 | SSSCA1      | 11 | Homo sapiens p27              | 0.02976926 | 0.02882316 | 1.51074952 |
| LOC339240   | NR_001443.1 | LOC339240   | 17 | Homo sapiens keratin pseudc   | 0.04420828 | 0.04007474 | 1.50643393 |
| LOC390387   | XR_000589.1 | LOC390387   | 13 | PREDICTED: Homo sapiens s     | 0.025426   | 0.02531061 | 1.5048964  |
| LOC10013463 | XM_00172640 | LOC10013463 | 7  | PREDICTED: Homo sapiens h     | 0.00403748 | 0.00529282 | 1.50178392 |
| LGALS8      | NM_201544.1 | LGALS8      | 1  | Homo sapiens Gal-8; PCTA-1    | 0.0539404  | 0.04727531 | 1.50045802 |
| ELOVL1      | NM_022821.2 | ELOVL1      | 1  | Homo sapiens CGI-88; Ssc1     | 0.0023843  | 0.00336495 | 1.49777161 |
| LOC10013113 | XR_037336.1 | LOC10013113 |    | PREDICTED: Homo sapiens n     | 0.02469849 | 0.02474926 | 1.49490604 |
| FAM21B      | XM_932746.1 | FAM21B      | 10 | PREDICTED: Homo sapiens fi    | 0.02872666 | 0.02796491 | 1.49448764 |
| SC5DL       | NM_006918.3 | SC5DL       | 11 | Homo sapiens ERG3; SC5D;      | 1.15E-05   | 4.2483E-05 | 1.4937828  |
| TRIM13      | NM_213590.1 | TRIM13      | 13 | Homo sapiens RNF77; CAR; I    | 0.00118409 | 0.0018582  | 1.48878558 |
| MIR761      | NR_031580.1 | MIR761      |    | Homo sapiens microRNA 761     | 0.01799472 | 0.01882504 | 1.48868918 |
| TBCC        | NM_003192.1 | TBCC        | 6  | Homo sapiens CFC              | 0.01519071 | 0.01630975 | 1.48558297 |
| RABGEF1     | NM_014504.1 | RABGEF1     | 7  | Homo sapiens rabex-5; FLJ3;   | 0.03561148 | 0.03344986 | 1.48320997 |
| LOC728686   | XR_038523.1 | LOC728686   |    | PREDICTED: Homo sapiens n     | 0.00431325 | 0.00558425 | 1.48146637 |
| NBPF3       | XM_939326.1 | NBPF3       |    | PREDICTED: Homo sapiens n     | 0.01114977 | 0.01257592 | 1.48133734 |
| TAF7        | NM_005642.2 | TAF7        | 5  | Homo sapiens TAFII55; TAF2    | 6.2691E-05 | 0.00016322 | 1.48089101 |
| CD55        | NM_000574.2 | CD55        | 1  | Homo sapiens CR; TC; DAF      | 0.0095454  | 0.01103879 | 1.48026196 |
| DNAJB9      | NM_012328.1 | DNAJB9      | 7  | Homo sapiens MSTP049; MD      | 0.00085388 | 0.00140562 | 1.47774779 |
|             | Hs.159057   | HS.159057   | 22 | Homo sapiens hypothetical p   | 0.03845232 | 0.03567523 | 1.47456609 |
| UBAP2       | NM_018449.2 | UBAP2       | 9  | Homo sapiens FLJ22435; KIA    | 0.00031717 | 0.0006154  | 1.47364217 |
| DNAL1       | NM_031427.1 | DNAL1       | 14 | Homo sapiens C14orf168; M     | 0.02703285 | 0.02662322 | 1.47224637 |
| ZNF136      | XM_936978.1 | ZNF136      |    | PREDICTED: Homo sapiens z     | 0.05542295 | 0.04833326 | 1.47154592 |
| HDAC6       | NM_006044.2 | HDAC6       |    | Homo sapiens FLJ16239; JM;    | 0.00233178 | 0.00330304 | 1.47126173 |
| PGM5P2      | NR_002836.1 | PGM5P2      | 9  | Homo sapiens phosphoglucor    | 0.03577004 | 0.03357004 | 1.46959175 |
| FAM63A      | NM_018379.2 | FAM63A      | 1  | Homo sapiens RP11-316M1.5     | 0.00764763 | 0.00912557 | 1.46922375 |
| LOC653557   | XM_00172590 | LOC653557   | 16 | PREDICTED: Homo sapiens h     | 0.0080092  | 0.0094976  | 1.46602472 |
| TARBP2      | NM_134324.2 | TARBP2      | 12 | Homo sapiens TRBP1; TRBP;     | 0.00026577 | 0.00053118 | 1.45991209 |
| POLR3B      | NM_018082.3 | POLR3B      | 12 | Homo sapiens PC2; FLJ103      | 0.00052617 | 0.00093967 | 1.45479005 |
| DOLK        | NM_014908.3 | DOLK        | 9  | Homo sapiens SEC59; DK; K     | 0.01156312 | 0.01296547 | 1.45054116 |
| CTNND1      | XM_943087.1 | CTNND1      |    | PREDICTED: Homo sapiens c     | 0.04052407 | 0.03720395 | 1.44791033 |
| LOC643558   | XM_932319.1 | LOC643558   | 7  | PREDICTED: Homo sapiens s     | 0.00656465 | 0.00802092 | 1.4441617  |
| ABCC6       | NM_00107952 | ABCC6       | 16 | Homo sapiens MOATE; EST3      | 0.00209289 | 0.00301329 | 1.4441585  |

## 5.0 ACL-Dependent Upreg

|             |             |             |                                 |            |            |            |
|-------------|-------------|-------------|---------------------------------|------------|------------|------------|
| LOC642335   | XM_943378.1 | LOC642335   | PREDICTED: Homo sapiens h       | 0.04751005 | 0.04254038 | 1.44148312 |
| ZNF513      | NM_144631.4 | ZNF513      | 2 Homo sapiens FLJ32203; HM     | 0.03274707 | 0.03114272 | 1.44134611 |
| LOC399753   | XM_930593.1 | LOC399753   | 10 PREDICTED: Homo sapiens h    | 0.04246192 | 0.03872775 | 1.4411751  |
| LOC440261   | XM_496059.2 | LOC440261   | 15 PREDICTED: Homo sapiens h    | 0.02515172 | 0.02510023 | 1.44085588 |
| BIRC6       | NM_016252.2 | BIRC6       | 2 Homo sapiens FLJ13726; KIA    | 0.00825791 | 0.00975692 | 1.44018242 |
| CD59        | NM_203329.1 | CD59        | 11 Homo sapiens MIN2; PROTEC    | 0.03035324 | 0.02929806 | 1.43958466 |
| C12orf76    | NM_207435.1 | C12ORF76    | 12 Homo sapiens FLJ11385        | 0.00288592 | 0.00394839 | 1.43547261 |
| PC          | NM_000920.2 | PC          | 11 Homo sapiens PCB             | 0.0491416  | 0.04372018 | 1.41269675 |
| PBX4        | NM_025245.1 | PBX4        | 19 Homo sapiens pre-B-cell leuk | 0.00202596 | 0.00292798 | 1.41111531 |
| HPS5        | NM_181507.1 | HPS5        | 11 Homo sapiens KIAA1017; AII   | 0.03798091 | 0.03529011 | 1.41072316 |
| LIN52       | NM_00102467 | LIN52       | 14 Homo sapiens C14orf46; c14   | 0.0522497  | 0.04596339 | 1.40547516 |
| RALGAPA1    | NM_194301.2 | RALGAPA1    | 14 Homo sapiens TULIP1; GRIP1   | 0.00083795 | 0.00138407 | 1.40484245 |
| RNF31       | NM_017999.3 | RNF31       | 14 Homo sapiens FLJ23501; MG    | 2.127E-05  | 6.9172E-05 | 1.40143884 |
| ADORA3      | NM_000677.2 | ADORA3      | 1 Homo sapiens AD026; RP11-     | 0.0418502  | 0.03825333 | 1.40134131 |
| CYP4V2      | NM_207352.2 | CYP4V2      | 4 Homo sapiens BCD; MGC435      | 0.01477043 | 0.01591889 | 1.40076628 |
| HIST1H2BK   | NM_080593.1 | HIST1H2BK   | 6 Homo sapiens MGC131989; I     | 1.0431E-07 | 1.4234E-06 | 1.40024646 |
| FXR2        | NM_004860.2 | FXR2        | 17 Homo sapiens FMR1L2          | 0.00791583 | 0.00940085 | 1.39951118 |
| FAAH        | NM_001441.1 | FAAH        | 1 Homo sapiens FAAH-1; MGC1     | 0.03158227 | 0.03025471 | 1.39943362 |
| ZNF533      | NM_152520.3 | ZNF533      | 2 Homo sapiens FLJ25270         | 0.01234377 | 0.01369034 | 1.39840182 |
| PRDM1       | NM_182907.1 | PRDM1       | 6 Homo sapiens MGC118922; I     | 0.01308907 | 0.0143842  | 1.39820502 |
| UPRT        | NM_145052.1 | UPRT        | X Homo sapiens RP11-311P8.3     | 0.0363225  | 0.03398673 | 1.39688135 |
| WHSC1L1     | NM_017778.2 | WHSC1L1     | 8 Homo sapiens pp14328; DKF     | 0.01211529 | 0.01348466 | 1.3930027  |
| FAM153B     | NM_00107952 | FAM153B     | 5 Homo sapiens DKFZp434D11      | 0.01951784 | 0.02017549 | 1.39280428 |
| LOC10013274 | XM_00172210 | LOC10013274 | 7 PREDICTED: Homo sapiens h     | 0.01549586 | 0.01658462 | 1.38267523 |
| MBTD1       | NM_017643.1 | MBTD1       | 17 Homo sapiens SA49P01; FLJ    | 0.01245349 | 0.01378936 | 1.37951715 |
| SLC35C1     | NM_018389.3 | SLC35C1     | 11 Homo sapiens FLJ14841; FU    | 0.00011319 | 0.0002642  | 1.37542824 |
| NFKB2       | NM_00107749 | NFKB2       | 10 Homo sapiens LYT10; LYT-10   | 0.01040395 | 0.01187052 | 1.37278006 |
|             |             |             | Hs.562875 HS.562875             | 0.03887484 | 0.03596835 | 1.36711809 |
| PSG3        | NM_021016.2 | PSG3        | 19 Homo sapiens pregnancy spe   | 0.04241913 | 0.03869676 | 1.36302617 |
| STAG3L3     | NM_00101373 | STAG3L3     | 7 Homo sapiens stromal antige   | 0.00187057 | 0.00273585 | 1.36286165 |
| PTPRA       | NM_002836.2 | PTPRA       | 20 Homo sapiens HPTPalpha; RF   | 0.00024873 | 0.00050307 | 1.36210198 |
| LOC678655   | NR_015382.1 | LOC678655   | 12 Homo sapiens hypothetical lc | 0.05252098 | 0.04615576 | 1.361678   |
| PTPRK       | NM_002844.2 | PTPRK       | 6 Homo sapiens DKFZp779N10      | 0.0002901  | 0.00057122 | 1.36072459 |
| STYXL1      | NM_016086.2 | STYXL1      | 7 Homo sapiens MK-STYX; DU      | 4.1356E-05 | 0.00011709 | 1.35999637 |
| SLC35C2     | NM_173073.2 | SLC35C2     | 20 Homo sapiens FLJ37039; BA    | 0.0298171  | 0.02885674 | 1.359662   |
| CIR1        | NM_004882.3 | CIR1        | 2 Homo sapiens corepressor in   | 0.02364152 | 0.02381524 | 1.35942825 |
| ATG4B       | NM_013325.4 | ATG4B       | 2 Homo sapiens AULT1; MGC1      | 0.00020869 | 0.00043493 | 1.35815459 |
| CD46        | NM_172358.1 | CD46        | 1 Homo sapiens TLX; MCP; TR     | 0.00016636 | 0.00036157 | 1.35508152 |
| IMMP2L      | NM_032549.1 | IMMP2L      | 7 Homo sapiens IMP2             | 0.00116533 | 0.00183368 | 1.35392919 |
| CENTG3      | NM_031946.3 | CENTG3      | 7 Homo sapiens MRIP-1; AGAP     | 0.00293357 | 0.00400609 | 1.35367088 |
| TTC32       | NM_00100823 | TTC32       | 2 Homo sapiens tetratricopepti  | 0.01530648 | 0.01641597 | 1.35342867 |
| UNC5A       | NM_133369.2 | UNC5A       | 5 Homo sapiens UNC5H1; FLJ1     | 0.00043616 | 0.0008038  | 1.35256671 |
| LOC729021   | NM_198284.1 | LOC729021   | 4 PREDICTED: Homo sapiens h     | 0.00075773 | 0.00127216 | 1.35144991 |
| EMILIN2     | NM_032048.2 | EMILIN2     | 18 Homo sapiens FLJ33200; FO    | 0.00079071 | 0.00131945 | 1.34583327 |
| SPINLW1     | NM_181502.1 | SPINLW1     | 20 Homo sapiens EPPIN; dJ461F   | 0.01137108 | 0.012791   | 1.34433819 |
| LOC791120   | NR_015357.1 | LOC791120   | Homo sapiens MGC149135          | 0.00069992 | 0.00118784 | 1.34215016 |
| CASP3       | NM_032991.2 | CASP3       | 4 Homo sapiens CPP32B; SCA-     | 0.00058736 | 0.00102987 | 1.33971971 |
| CYorf14     | NR_001544.1 | CYORF14     | Y Homo sapiens PRO2834          | 0.03837929 | 0.03561501 | 1.33908275 |
| LRTC2       | NM_181715.1 | LRTC2       | 1 Homo sapiens RP11-422P24.     | 0.03623059 | 0.03392606 | 1.33795155 |
| LPCAT1      | NM_024830.3 | LPCAT1      | 5 Homo sapiens FLJ12443; PF     | 0.01139842 | 0.01281847 | 1.33641466 |
| PLA2G2D     | NM_012400.2 | PLA2G2D     | 1 Homo sapiens SPLASH; sPLA     | 0.03278398 | 0.03116094 | 1.33578169 |
| SELO        | NM_031454.1 | SELO        | 22 Homo sapiens MGC131879       | 0.01663158 | 0.01761535 | 1.33423376 |
| TMEM63B     | NM_018426.1 | TMEM63B     | 6 Homo sapiens DKFZp686N22      | 0.0006809  | 0.00116162 | 1.3340739  |
| SIN3B       | NM_015260.1 | SIN3B       | 19 Homo sapiens KIAA0700        | 0.00635083 | 0.00779877 | 1.33389346 |
| ABCB9       | NM_203444.1 | ABCB9       | 12 Homo sapiens TAPL; KIAA15    | 8.1537E-05 | 0.00020295 | 1.33079739 |
| RNMT        | NM_003799.1 | RNMT        | 18 Homo sapiens RG7MT1; KIA     | 0.00014419 | 0.00032135 | 1.3296692  |
| WASH2P      | NR_024077.2 | WASH2P      | 2 Homo sapiens WAS protein fr   | 0.01136494 | 0.01278901 | 1.3248881  |
| IRX1        | NM_024337.3 | IRX1        | 5 Homo sapiens IRX-5            | 0.0310762  | 0.02983179 | 1.32465454 |
| PPOX        | NM_000309.2 | PPOX        | 1 Homo sapiens MGC8485; VP      | 0.00034366 | 0.0006585  | 1.32429249 |
| MLL         | NM_005933.2 | MLL         | 11 Homo sapiens TRX1; HRX; C    | 0.0435591  | 0.03956803 | 1.32239149 |
| FAM107B     | NM_031453.2 | FAM107B     | 10 Homo sapiens FLJ45505; C1    | 0.00084229 | 0.00138967 | 1.32097328 |
| TMEM115     | NM_007024.4 | TMEM115     | 3 Homo sapiens PL6              | 9.9689E-05 | 0.00023931 | 1.320784   |
| RSPH3       | NM_031924.3 | RSPH3       | 6 Homo sapiens dJ111C20.1; F    | 0.0008113  | 0.00134868 | 1.32073649 |
| APAF1       | NM_181869.1 | APAF1       | 12 Homo sapiens CED4; DKFZp     | 0.00517652 | 0.00653979 | 1.31454524 |
| RIPK1       | NM_003804.3 | RIPK1       | 6 Homo sapiens RIP; FLJ39204    | 0.02915724 | 0.02832123 | 1.30878841 |
| LOC147727   | NR_024333.1 | LOC147727   | 19 Homo sapiens hypothetical L  | 0.03528434 | 0.03318877 | 1.30853736 |
| EDEM1       | NM_014674.1 | EDEM1       | 3 Homo sapiens KIAA0212; ED     | 0.03397965 | 0.03211304 | 1.30701328 |
| GATAD2B     | NM_020699.1 | GATAD2B     | 1 Homo sapiens MGC138285; I     | 0.0009924  | 0.00159708 | 1.30646265 |
| CTDP1       | NM_004715.3 | CTDP1       | 18 Homo sapiens CCFDN; FCP1     | 0.05018924 | 0.04444493 | 1.30581489 |
| DLK2        | NM_023932.2 | DLK2        | 6 Homo sapiens MGC2487; EG      | 0.02168521 | 0.0220957  | 1.3038177  |

## 5.0 ACL-Dependent Upreg

|             |                          |                                      |            |            |            |
|-------------|--------------------------|--------------------------------------|------------|------------|------------|
| OSBPL2      | NM_144498.1 OSBPL2       | 20 Homo sapiens MGC4307; KIA         | 0.00169218 | 0.00251094 | 1.30378044 |
| PICK1       | NM_012407.3 PICK1        | 22 Homo sapiens MGC15204; PI         | 0.00042145 | 0.00078211 | 1.30330339 |
| C4orf41     | NM_199053.1 C4ORF41      | 4 Homo sapiens FLJ12716              | 0.02270208 | 0.02299827 | 1.30309392 |
| FAM76B      | NM_144664.3 FAM76B       | 11 Homo sapiens MGC33371             | 0.0339528  | 0.03209458 | 1.29982457 |
| NCOA3       | NM_006534.2 NCOA3        | 20 Homo sapiens CAGH16; TNR          | 0.00758142 | 0.00905642 | 1.29463274 |
| LOC10013424 | XM_00171742 LOC100134241 | PREDICTED: Homo sapiens h            | 0.0395425  | 0.03650525 | 1.29340086 |
| LSM8        | NM_016200.2 LSM8         | 7 Homo sapiens YJR022W               | 0.01323597 | 0.014522   | 1.29312624 |
| C9orf130    | XM_939697.1 C9ORF130     | PREDICTED: Homo sapiens c            | 0.00026111 | 0.0005245  | 1.29192375 |
| ZNF302      | XM_927060.1 ZNF302       | 19 Homo sapiens HSD16; ZNF3          | 0.00894835 | 0.01045304 | 1.29012138 |
| RAB11FIP2   | NM_014904.1 RAB11FIP2    | 10 Homo sapiens Rab11-FIP2; K        | 0.00030079 | 0.00058975 | 1.28841645 |
| IFNAR1      | NM_000629.2 IFNAR1       | 21 Homo sapiens IFNBR; IFN- $\alpha$ | 0.04225624 | 0.03856821 | 1.28778849 |
| TUBD1       | NM_016261.2 TUBD1        | 17 Homo sapiens FLJ12709; TUI        | 0.02915094 | 0.02831824 | 1.28334987 |
| MCAT        | NM_173467.3 MCAT         | 22 Homo sapiens MCT; MT; FAS         | 0.00156953 | 0.00235442 | 1.27830511 |
| C14orf102   | NM_199043.1 C14ORF102    | 14 Homo sapiens FLJ14051; FLJ        | 0.00066502 | 0.00113851 | 1.27699495 |
| RPS4Y2      | NM_00103956 RPS4Y2       | Homo sapiens RPS4Y2P                 | 0.02459489 | 0.02466799 | 1.27569441 |
| CDC42SE1    | NM_00103870 CDC42SE1     | 1 Homo sapiens SCIP1; SPEC1          | 0.0006456  | 0.00111112 | 1.27100483 |
| LOC10013083 | XR_038851.1 LOC10013083  | 11 PREDICTED: Homo sapiens n         | 0.01238735 | 0.01372999 | 1.2683503  |
| ABCA7       | NM_019112.2 ABCA7        | 19 Homo sapiens ABCA-SSN; AE         | 0.00652186 | 0.00797975 | 1.26820978 |
| VPS33B      | NM_018668.2 VPS33B       | 15 Homo sapiens FLJ14848             | 0.0002066  | 0.0004314  | 1.26812565 |
| ECD         | NM_007265.1 ECD          | 10 Homo sapiens GCR2; HSGT1          | 0.00429883 | 0.00556969 | 1.26622946 |
| C12orf62    | NM_032901.2 C12ORF62     | 12 Homo sapiens MGC14288             | 0.00244437 | 0.00343315 | 1.26586784 |
| OAZ2        | NM_002537.2 OAZ2         | 15 Homo sapiens AZ2                  | 0.02824443 | 0.02759958 | 1.26576772 |
| LOC648705   | XM_937787.1 LOC648705    | PREDICTED: Homo sapiens h            | 0.02040781 | 0.02096945 | 1.26321363 |
| NFE2L1      | NM_003204.1 NFE2L1       | 17 Homo sapiens FLJ00380; TCF        | 0.00013094 | 0.00029732 | 1.26292952 |
| COX15       | NM_004376.3 COX15        | 10 Homo sapiens COX15 homolo         | 0.01056037 | 0.01020865 | 1.2628013  |
| GOLGB1      | NM_004487.1 GOLGB1       | 3 Homo sapiens GOLIM1; GCP           | 9.7155E-05 | 0.00023425 | 1.26105665 |
|             | Hs.542428 HS.542428      | 20 xc76e10.x1 NCI_CGAP_Ov32          | 0.00798737 | 0.00947428 | 1.26077479 |
| RCOR3       | NM_018254.2 RCOR3        | 1 Homo sapiens FLJ10876; RP          | 0.00479853 | 0.00612664 | 1.2601393  |
| LOC440928   | XM_942885.1 LOC440928    | PREDICTED: Homo sapiens h            | 0.0092354  | 0.01073832 | 1.25768985 |
| CDS1        | NM_001263.2 CDS1         | 4 Homo sapiens CDS                   | 0.00087017 | 0.00142788 | 1.25581025 |
| RC3H2       | NM_018835.1 RC3H2        | 9 Homo sapiens MGC52176; M           | 0.04829553 | 0.04312487 | 1.25523079 |
| HMOX1       | NM_002133.1 HMOX1        | 22 Homo sapiens HO-1; bK286E         | 0.00738998 | 0.00886514 | 1.25494871 |
| OR5D16      | NM_00100549 OR5D16       | 11 Homo sapiens OR11-154             | 0.02841502 | 0.02771688 | 1.25119984 |
| NSUN5C      | NM_145645.1 NSUN5C       | 7 Homo sapiens WBSCR20B; N           | 0.00288881 | 0.00395111 | 1.24586702 |
| LOC10013442 | XR_038546.1 LOC100134424 | PREDICTED: Homo sapiens n            | 0.04361117 | 0.03961122 | 1.24408494 |
| STARD3      | NM_006804.2 STARD3       | 17 Homo sapiens es64; FLJ4137        | 0.01600347 | 0.01703646 | 1.24295686 |
| SNAPC1      | NM_003082.2 SNAPC1       | 14 Homo sapiens SNAP43; PTFg         | 0.0487757  | 0.04346516 | 1.24233756 |
| GTF2H4      | NM_001517.4 GTF2H4       | 6 Homo sapiens TFIIF                 | 0.00219057 | 0.00313183 | 1.24116152 |
| KCTD10      | NM_031954.3 KCTD10       | 12 Homo sapiens MSTP028; FLJ         | 0.02878113 | 0.02799619 | 1.24066668 |
| LOC10012851 | XM_00171575 LOC100128510 | PREDICTED: Homo sapiens h            | 0.01430944 | 0.01550395 | 1.23912415 |
| STAG3L2     | NM_00101373 STAG3L2      | 7 Homo sapiens MGC131759             | 0.00066195 | 0.00113393 | 1.23684064 |
| ZSWIM1      | NM_080603.3 ZSWIM1       | 20 Homo sapiens C20orf162            | 0.00064397 | 0.00110896 | 1.23681588 |
| SGSH        | NM_000199.2 SGSH         | 17 Homo sapiens HSS; MPS3A;          | 0.00516374 | 0.0065274  | 1.23576371 |
| C10orf32    | NM_144591.1 C10ORF32     | 10 Homo sapiens RP11-753C18.         | 0.01106752 | 0.01250727 | 1.23253167 |
| LOC729375   | NR_024252.1 LOC729375    | 3 Homo sapiens family with se        | 0.01216569 | 0.01352874 | 1.2302602  |
| PRDM16      | NM_022114.2 PRDM16       | 1 Homo sapiens PFM13; MEL1;          | 0.04562735 | 0.04116126 | 1.23011249 |
| ALG5        | NM_013338.3 ALG5         | 13 Homo sapiens ba421P11.2; f        | 0.00055635 | 0.00098614 | 1.22929215 |
| EAF1        | NM_033083.5 EAF1         | 3 Homo sapiens ELL associatec        | 0.00037324 | 0.00070623 | 1.22904515 |
| LYRM2       | NM_020466.3 LYRM2        | 6 Homo sapiens DJ12208.2; FI         | 0.01924633 | 0.01994182 | 1.2279413  |
| TRIP4       | NM_016213.3 TRIP4        | 15 Homo sapiens HsT17391             | 0.00395392 | 0.00519647 | 1.22744028 |
| FAM91A1     | NM_144963.1 FAM91A1      | 8 Homo sapiens DKFZp666B10           | 0.01422311 | 0.01542566 | 1.22393908 |
| SATB2       | NM_015265.1 SATB2        | 2 Homo sapiens MGC119474; I          | 0.01319446 | 0.0144837  | 1.22063894 |
| SH2B3       | NM_005475.1 SH2B3        | 12 Homo sapiens LNK                  | 0.00070023 | 0.0011879  | 1.21995313 |
| MC1R        | NM_002386.2 MC1R         | 16 Homo sapiens SHEP1; MSH-F         | 0.04014123 | 0.03693751 | 1.21994492 |
| C9orf156    | NM_016481.2 C9ORF156     | 9 Homo sapiens NAP1; RP11-2          | 0.04999503 | 0.04431768 | 1.21945028 |
|             | Hs.14555 HS.14555        | 10 Homo sapiens cDNA: FLJ215         | 0.00153697 | 0.00231469 | 1.21941601 |
| OSBPL7      | NM_145798.2 OSBPL7       | 17 Homo sapiens MGC71150; O          | 0.01651437 | 0.0175081  | 1.21910289 |
| PIM2        | NM_006875.2 PIM2         | Homo sapiens pim-2 oncog             | 0.00970001 | 0.01118222 | 1.21858942 |
| VPS37A      | NM_152415.1 VPS37A       | 8 Homo sapiens HCRP1; FLJ32          | 0.00288828 | 0.00395101 | 1.21740759 |
| AGK         | NM_018238.2 AGK          | 7 Homo sapiens MULK; FLJ108          | 0.0110434  | 0.01248162 | 1.2171387  |
| ZGPAT       | NM_181484.1 ZGPAT        | 20 Homo sapiens ZC3H9; ZC3H          | 0.03998566 | 0.03682525 | 1.21655434 |
| LOC148413   | NR_015434.1 LOC148413    | 1 Homo sapiens hypothetical L        | 0.00199693 | 0.00289031 | 1.21649032 |
| PPFIA1      | NM_003626.2 PPFIA1       | 11 Homo sapiens MGC26800; FI         | 0.00048404 | 0.00087603 | 1.21538071 |
| ZNF295      | NM_020727.3 ZNF295       | 21 Homo sapiens ZBTB21; DKFz         | 0.02272023 | 0.023014   | 1.21526475 |
| SLC4A5      | NM_133478.2 SLC4A5       | 2 Homo sapiens NBC4; MGC12           | 0.00333687 | 0.00448014 | 1.21266318 |
| MDM2        | NM_006879.2 MDM2         | 12 Homo sapiens hdm2; HDMX;          | 0.04949063 | 0.04396828 | 1.21252261 |
| KIAA0355    | NM_014686.2 KIAA0355     | 19 Homo sapiens KIAA0355 (KI         | 0.00113314 | 0.00178816 | 1.21238922 |
| KLHL24      | NM_017644.3 KLHL24       | 3 Homo sapiens FLJ25796; KR          | 0.03883942 | 0.03593937 | 1.21208782 |
| ADO         | NM_032804.5 ADO          | 10 Homo sapiens FLJ14547; DK         | 0.0015722  | 0.00235723 | 1.21196806 |
| SCNM1       | NM_024041.2 SCNM1        | 1 Homo sapiens MGC3180               | 0.03788192 | 0.03521678 | 1.21092057 |

## 5.0 ACL-Dependent Upreg

|             |                         |                                 |            |            |            |
|-------------|-------------------------|---------------------------------|------------|------------|------------|
| GPT2        | NM_133443.1 GPT2        | 16 Homo sapiens ALT2            | 3.8118E-05 | 0.00010962 | 1.2107004  |
| SEC23IP     | NM_007190.2 SEC23IP     | 10 Homo sapiens P125; MSTP05    | 0.00054233 | 0.0009648  | 1.20426981 |
| AUP1        | NM_012103.2 AUP1        | 2 Homo sapiens ancient ubiqul   | 0.00666831 | 0.00812495 | 1.20344189 |
| RHOT2       | NM_138769.1 RHOT2       | 16 Homo sapiens C16orf39; ARF   | 0.01281152 | 0.01412342 | 1.20224166 |
| COQ10A      | NM_144576.2 COQ10A      | 12 Homo sapiens FLJ32452        | 0.0234462  | 0.02366467 | 1.20137883 |
| NR1H3       | NM_005693.1 NR1H3       | 11 Homo sapiens LXR-a; LXRA;    | 0.02024356 | 0.0208324  | 1.20100676 |
| COMMD2      | NM_016094.2 COMMD2      | 3 Homo sapiens HSPC042; MG      | 0.01750434 | 0.01841303 | 1.20004284 |
| MSTO1       | NM_018116.2 MSTO1       | 1 Homo sapiens LST005; DKFZ     | 0.00406235 | 0.00532066 | 1.19660948 |
| PDCD10      | NM_145860.1 PDCD10      | 3 Homo sapiens TFAR15; MGC      | 0.00766757 | 0.00914563 | 1.19590746 |
| IWS1        | NM_017969.1 IWS1        | 2 Homo sapiens MGC126376; I     | 0.00102038 | 0.00163582 | 1.19502992 |
| NSUN5       | NM_148956.1 NSUN5       | 7 Homo sapiens p120; FLJ102     | 0.00058866 | 0.00103154 | 1.19438835 |
| EXTL3       | NM_001440.2 EXTL3       | 8 Homo sapiens KIAA0519; RE     | 0.0029336  | 0.00400055 | 1.19025615 |
| CDC42BPB    | NM_006035.2 CDC42BPB    | 14 Homo sapiens KIAA1124; MR    | 0.00749859 | 0.00897213 | 1.1900792  |
| ATXN7L3     | Hs.512651 ATXN7L3       | 17 Homo sapiens DKFZp761G21     | 0.000956   | 0.00154645 | 1.18755218 |
| TPR         | NM_005807.2 TPR         | 1 Homo sapiens translocated p   | 0.00196074 | 0.00284638 | 1.18564098 |
|             | Hs.542993 HS.542993     | 3 xj89b12.x1 Soares_NFL_T_G     | 0.03198787 | 0.03056983 | 1.18291951 |
| ANKIB1      | NM_019004.1 ANKIB1      | 7 Homo sapiens DKFZP434A02      | 0.00043838 | 0.00080654 | 1.18168139 |
| C19orf6     | NM_00103302 C19ORF6     | 19 Homo sapiens R32184_3; AS    | 0.00021133 | 0.00043929 | 1.18130471 |
| MVP         | NM_017458.2 MVP         | 16 Homo sapiens LRP; VAULT1     | 0.01501782 | 0.01614388 | 1.18061759 |
| SDSL        | NM_138432.2 SDSL        | 12 Homo sapiens SDS-RS1         | 0.00428683 | 0.00555742 | 1.1806013  |
| C1orf63     | NM_207035.1 C1ORF63     | 1 Homo sapiens RP3-465N24.4     | 0.00309684 | 0.00419899 | 1.17991813 |
| GOLT1B      | NM_016072.2 GOLT1B      | 12 Homo sapiens GOT1; YMR29     | 0.01093054 | 0.0123684  | 1.17921238 |
| FLJ25363    | XM_00172072 FLJ25363    | PREDICTED: Homo sapiens s       | 0.00630505 | 0.00775666 | 1.17903624 |
| TUG1        | NR_002323.1 TUG1        | 22 Homo sapiens MGC46067; FI    | 6.9179E-05 | 0.00017706 | 1.17897948 |
| C11orf73    | NM_016401.2 C11ORF73    | 11 Homo sapiens L7RN6; HSPC1    | 0.00893675 | 0.01044367 | 1.17890161 |
| TMUB2       | NM_024107.2 TMUB2       | 17 Homo sapiens MGC3123; FP     | 0.01262083 | 0.01394826 | 1.1780431  |
| WSB1        | NM_134264.2 WSB1        | 17 Homo sapiens WSB-1; SWIP     | 0.00096204 | 0.00155421 | 1.17474755 |
| GGPS1       | NM_004837.2 GGPS1       | 1 Homo sapiens GGPPS1; GGP      | 0.01725781 | 0.01820171 | 1.17223122 |
| ENTPD6      | NM_001247.1 ENTPD6      | 20 Homo sapiens DKFZp781K21     | 0.00977711 | 0.01125631 | 1.1718254  |
| IDH3A       | NM_005530.2 IDH3A       | 15 Homo sapiens isocitrate dehy | 0.02171111 | 0.02211439 | 1.17175873 |
| TTC5        | NM_138376.1 TTC5        | 14 Homo sapiens Strap           | 0.01989357 | 0.02052036 | 1.17134031 |
| PNKP        | NM_007254.2 PNKP        | 19 Homo sapiens PNK             | 0.00067377 | 0.0011508  | 1.17129526 |
| DLEU1       | NR_002605.1 DLEU1       | 13 Homo sapiens XTP6; MGC22     | 0.01784743 | 0.01869548 | 1.16933874 |
| STX5        | NM_003164.2 STX5        | 11 Homo sapiens STX5A; SED5     | 0.0007     | 0.00118773 | 1.16872911 |
| TMEM181     | XM_941693.1 TMEM181     | 6 Homo sapiens KIAA1423; GP     | 2.4929E-05 | 7.8088E-05 | 1.16835491 |
| GPN2        | NM_018066.3 GPN2        | 1 Homo sapiens FLJ10349         | 0.00341222 | 0.00456663 | 1.16813298 |
| PEX19       | NM_002857.2 PEX19       | 1 Homo sapiens D1S2223E; PX     | 0.04837413 | 0.04318627 | 1.16660921 |
| ZMYND19     | NM_138462.2 ZMYND19     | 9 Homo sapiens MIZIP; RP11-4    | 0.00117375 | 0.00184396 | 1.16652375 |
| LOC440341   | XM_932044.1 LOC440341   | 16 PREDICTED: Homo sapiens s    | 0.00050746 | 0.0009107  | 1.16248531 |
| LOC389517   | NM_00103238 LOC389517   | Homo sapiens similar to Willi   | 0.00019709 | 0.00041478 | 1.16133571 |
| YTHDF3      | NM_152758.3 YTHDF3      | 8 Homo sapiens FLJ31657         | 0.04891802 | 0.0435566  | 1.15532696 |
| KPNA1       | NM_002264.1 KPNA1       | 3 Homo sapiens SRP1; RCH2; I    | 0.01110123 | 0.0125389  | 1.15390471 |
| ZNF800      | NM_176814.3 ZNF800      | 7 Homo sapiens MGC130033; I     | 0.04963563 | 0.04405695 | 1.15334375 |
| TYW1B       | XR_015176.2 TYW1B       | 7 PREDICTED: Homo sapiens n     | 0.01887318 | 0.01959916 | 1.15328819 |
| LOC10013256 | XM_00171380 LOC10013256 | 12 PREDICTED: Homo sapiens h    | 0.00011006 | 0.00025847 | 1.15148329 |
| LRRFIP1     | NM_004735.2 LRRFIP1     | 2 Homo sapiens MGC10947; G      | 0.01354327 | 0.01480178 | 1.14946826 |
| KIAA2013    | NM_138346.1 KIAA2013    | 1 Homo sapiens MGC33867; R      | 0.00038716 | 0.00072801 | 1.14942812 |
| UAP1        | NM_003115.3 UAP1        | 1 Homo sapiens AGX1; AgX; S     | 0.00402029 | 0.00527659 | 1.14511318 |
| USP8        | NM_005154.2 USP8        | 15 Homo sapiens KIAA0055; FL    | 0.01118744 | 0.01261192 | 1.14490156 |
| C5orf15     | NM_020199.1 C5ORF15     | 5 Homo sapiens HTGN29; KCT      | 0.00021269 | 0.00044118 | 1.14204716 |
| KRT19       | NM_002276.3 KRT19       | 17 Homo sapiens K19; CK19; M    | 0.00079519 | 0.00132516 | 1.14176088 |
| PNO1        | NM_020143.2 PNO1        | 2 Homo sapiens KHRBP1           | 0.05563373 | 0.04850261 | 1.14146245 |
| TM2D3       | NM_025141.2 TM2D3       | 15 Homo sapiens BLP2            | 0.00062274 | 0.00107982 | 1.13971991 |
| C4orf14     | NM_032313.2 C4ORF14     | 4 Homo sapiens mAtNOS1; hA      | 6.1992E-05 | 0.00016169 | 1.13867938 |
| KCNQ2       | NM_004518.2 KCNQ2       | 20 Homo sapiens KVEBN1; KV7     | 0.03149737 | 0.03018655 | 1.13683502 |
| SPOP        | NM_00100722 SPOP        | 17 Homo sapiens TEF2            | 7.7757E-05 | 0.00019515 | 1.13650988 |
| DYNC1H1     | NM_001376.2 DYNC1H1     | 14 Homo sapiens DNECL; DNCH     | 6.9944E-05 | 0.00017871 | 1.13643062 |
| MGC52000    | NM_198943.1 MGC52000    | 2 Homo sapiens C5orf1; MGC      | 0.00138424 | 0.00212109 | 1.13600162 |
| RAB2B       | NM_032846.2 RAB2B       | 14 Homo sapiens FLJ14824        | 0.00027202 | 0.00054034 | 1.13581347 |
| ACVR1       | NM_001105.2 ACVR1       | 2 Homo sapiens ALK2; SKR1; f    | 0.00708883 | 0.00855182 | 1.13490362 |
| NP1P        | NM_006985.1 NP1P        | 16 Homo sapiens nuclear pore c  | 0.03228552 | 0.0308006  | 1.13473901 |
| FBXL12      | NM_017703.1 FBXL12      | 19 Homo sapiens Fbl12; FLJ201   | 0.04022918 | 0.03698741 | 1.13446138 |
| SLC30A9     | NM_006345.3 SLC30A9     | 4 Homo sapiens C4orf1; HUEL;    | 0.0001583  | 0.00034759 | 1.13420505 |
| EAPP        | NM_018453.3 EAPP        | 13 Homo sapiens FLJ20578; MG    | 0.00229855 | 0.00326494 | 1.13290095 |
| KPNA4       | NM_002268.3 KPNA4       | 3 Homo sapiens MGC12217; M      | 0.00378531 | 0.00499885 | 1.13202241 |
| LOC728138   | XM_00112828 LOC728138   | 16 PREDICTED: Homo sapiens h    | 0.00447727 | 0.00576598 | 1.13157923 |
| POLR3C      | NM_006468.5 POLR3C      | 1 Homo sapiens RPC62; RPC3      | 0.00898616 | 0.01048884 | 1.1315777  |
| KIAA0528    | NM_014802.1 KIAA0528    | 12 Homo sapiens DKFZp779N20     | 0.01018554 | 0.01165314 | 1.13035063 |
| PMPCA       | NM_015160.1 PMPCA       | 9 Homo sapiens Alpha-MPP; KI    | 0.00041352 | 0.00076967 | 1.13033706 |
| LOC440348   | NM_00101805 LOC440348   | 16 Homo sapiens A-761H5.4       | 0.01596269 | 0.01700543 | 1.12965557 |

## 5.0 ACL-Dependent Upreg

|             |             |              |   |                                 |            |            |            |
|-------------|-------------|--------------|---|---------------------------------|------------|------------|------------|
| LOC729148   | XM_372205.4 | LOC729148    | X | PREDICTED: Homo sapiens s       | 0.00371545 | 0.00491843 | 1.1293886  |
| GOLGA5      | NM_005113.2 | GOLGA5       |   | 14 Homo sapiens RFG5; ret-II; ( | 0.01259088 | 0.01392216 | 1.12880455 |
| FOXJ3       | NM_014947.3 | FOXJ3        |   | 1 Homo sapiens MGC165036; I     | 0.0055932  | 0.00699768 | 1.12625525 |
| RAB3GAP1    | NM_012233.1 | RAB3GAP1     |   | 2 Homo sapiens RAB3GAP; RAI     | 0.00735216 | 0.00882823 | 1.12522912 |
| APEX2       | NM_014481.2 | APEX2        | X | Homo sapiens XTH2; APEXL2       | 0.00246521 | 0.00345689 | 1.12442942 |
| YIPF6       | NM_173834.2 | YIPF6        | X | Homo sapiens RP13-253K9.1       | 0.00028871 | 0.00056887 | 1.12418159 |
| BRPF1       | NM_00100369 | BRPF1        |   | 3 Homo sapiens BR140            | 0.00477034 | 0.00609776 | 1.12402693 |
| MRPL53      | NM_053050.2 | MRPL53       |   | 2 Homo sapiens MGC20402; FL     | 0.03629794 | 0.03397462 | 1.12366819 |
| CHUK        | NM_001278.3 | CHUK         |   | 10 Homo sapiens NFKBIKA; IKK    | 0.01060633 | 0.01206847 | 1.12173273 |
| PARP4       | NM_006437.2 | PARP4        |   | 13 Homo sapiens p193; PARPL;    | 7.722E-05  | 0.00019402 | 1.1204985  |
| BIVM        | NM_017693.2 | BIVM         |   | 13 Homo sapiens MGC133326       | 0.01272785 | 0.0140506  | 1.12007108 |
| PAN2        | NM_014871.2 | PAN2         |   | 12 Homo sapiens PAN2; hPAN2;    | 0.02941535 | 0.02853718 | 1.11953527 |
| C1orf128    | NM_020362.2 | C1ORF128     |   | 1 Homo sapiens TXNL1CL; HT0     | 0.00204729 | 0.00295492 | 1.11946392 |
|             | Hs.348514   | HS.348514    |   | 4 Homo sapiens, clone IMAGE:    | 0.00060805 | 0.00105833 | 1.11934115 |
| HDHD2       | NM_032124.3 | HDHD2        |   | 18 Homo sapiens 3110052N05R     | 0.03252605 | 0.03097618 | 1.11552672 |
|             | Hs.545976   | HS.545976    | X | xm52h06.x1 NCI_CGAP_GC6         | 0.03529711 | 0.03319722 | 1.11397844 |
| GORASP2     | NM_015530.3 | GORASP2      |   | 2 Homo sapiens GOLPH6; p59;     | 0.00242457 | 0.00341026 | 1.11300835 |
| LOC728457   | XR_037027.1 | LOC728457    |   | 7 PREDICTED: Homo sapiens n     | 0.04337862 | 0.03941632 | 1.11099838 |
| EDC4        | NM_014329.3 | EDC4         |   | 16 Homo sapiens HEDLS; RCD-ε    | 0.00101582 | 0.00162939 | 1.11034311 |
| LOC728734   | XM_930180.1 | LOC728734    |   | 16 PREDICTED: Homo sapiens s    | 0.03096947 | 0.02974887 | 1.11020796 |
| MBTPS1      | NM_201268.1 | MBTPS1       |   | 16 Homo sapiens MGC138712; I    | 0.00171223 | 0.00253726 | 1.11005402 |
| LOC643336   | XM_00171856 | LOC643336    |   | PREDICTED: Homo sapiens s       | 0.01059988 | 0.01206269 | 1.10534684 |
| KIAA0194    | XM_940209.1 | KIAA0194     |   | PREDICTED: Homo sapiens K       | 0.00482646 | 0.00615872 | 1.10441278 |
| C17orf90    | XM_941327.1 | C17ORF90     |   | 17 Homo sapiens MGC104712       | 0.00512052 | 0.0064821  | 1.10318753 |
| PFDN6       | NM_014260.2 | PFDN6        |   | 6 Homo sapiens HKE2; PFD6; I    | 0.00067731 | 0.00115595 | 1.10280717 |
| MRPL21      | NM_181513.1 | MRPL21       |   | 11 Homo sapiens MGC62013        | 0.00097481 | 0.00157196 | 1.10240467 |
| HERPUD1     | NM_00101099 | HERPUD1      |   | 16 Homo sapiens Mif1; SUP; HE   | 0.00659694 | 0.00805252 | 1.10133981 |
| POLR2B      | NM_000938.1 | POLR2B       |   | 4 Homo sapiens RPB2; hsRPB2     | 0.00277512 | 0.00381764 | 1.10111513 |
| C17orf70    | NM_025161.3 | C17ORF70     |   | 17 Homo sapiens FAAP100; FLJ:   | 0.00466857 | 0.00597986 | 1.09936308 |
| C1orf55     | NM_152608.2 | C1ORF55      |   | 1 Homo sapiens dj671D7.1; FL    | 0.04635922 | 0.0416758  | 1.0988338  |
| ERCC1       | NM_001983.2 | ERCC1        |   | 19 Homo sapiens UV20; COFS4     | 0.04249447 | 0.03874535 | 1.09851929 |
| KIAA0907    | NM_014949.2 | KIAA0907     |   | 1 Homo sapiens RP11-336K24.     | 0.03969145 | 0.03659655 | 1.09851736 |
| LOC10013051 | XM_00172034 | LOC100130516 |   | PREDICTED: Homo sapiens h       | 0.02405924 | 0.02419159 | 1.09795741 |
| DUS1L       | NM_022156.3 | DUS1L        |   | 17 Homo sapiens DUS1; PP3111    | 0.03120424 | 0.02993178 | 1.09746416 |
| SRP19       | NM_003135.1 | SRP19        |   | 5 Homo sapiens signal recognit  | 0.0112831  | 0.01270507 | 1.09633688 |
| EXOC7       | NM_015219.2 | EXOC7        |   | 17 Homo sapiens Exo70p; 2-5-3   | 0.00239069 | 0.00337288 | 1.09612317 |
| CCDC90B     | NM_021825.3 | CCDC90B      |   | 11 Homo sapiens MDS011; MGC     | 0.02154192 | 0.02198288 | 1.09523532 |
| KIAA1598    | NM_018330.3 | KIAA1598     |   | 10 Homo sapiens shootin1; shoc  | 0.00268552 | 0.00371242 | 1.09440149 |
| LOC728888   | XM_930046.1 | LOC728888    |   | 16 PREDICTED: Homo sapiens s    | 0.00111678 | 0.00176743 | 1.09429977 |
| UBP1        | NM_014517.2 | UBP1         |   | 3 Homo sapiens LBP-1B; LBP1/    | 0.00544109 | 0.00683173 | 1.09396302 |
| LOC10013254 | XR_039468.1 | LOC10013254  |   | 12 PREDICTED: Homo sapiens n    | 0.01120043 | 0.01262332 | 1.09339884 |
| C22orf30    | NM_173566.2 | C22ORF30     |   | 22 Homo sapiens chromosome 2    | 0.03717838 | 0.03467295 | 1.09310584 |
| NAT9        | NM_015654.3 | NAT9         |   | 17 Homo sapiens EBSF; DKFZP5    | 0.02996391 | 0.02897645 | 1.0928495  |
| CCDC28A     | NM_015439.2 | CCDC28A      |   | 6 Homo sapiens C6orf80; CCRI    | 0.05437277 | 0.0475782  | 1.092709   |
| GOT1        | NM_002079.1 | GOT1         |   | 10 Homo sapiens GIG18           | 0.00038236 | 0.00072101 | 1.09028629 |
| PICALM      | NM_007166.2 | PICALM       |   | 11 Homo sapiens LAP; CALM; CI   | 0.02410124 | 0.02422548 | 1.08988847 |
| CETN2       | NM_004344.1 | CETN2        | X | Homo sapiens CEN2; CALT         | 0.00407496 | 0.00533558 | 1.08859135 |
| VIL2        | NM_003379.3 | VIL2         |   | 6 Homo sapiens MGC1584; CVI     | 0.00094871 | 0.00153777 | 1.08819633 |
| INTS9       | NM_018250.1 | INTS9        |   | 8 Homo sapiens RC74; FLJ108     | 0.01247596 | 0.01381076 | 1.08817455 |
| STK36       | NM_015690.2 | STK36        |   | 2 Homo sapiens FU; DKFZp434     | 0.02654647 | 0.02625028 | 1.08778743 |
| LOC647954   | XM_938141.1 | LOC647954    |   | PREDICTED: Homo sapiens n       | 0.01113539 | 0.01256616 | 1.08755028 |
| CCDC6       | NM_005436.2 | CCDC6        |   | 10 Homo sapiens TST1; TPC; PT   | 0.00437096 | 0.00564647 | 1.08715384 |
| SNRPB2      | NM_003092.3 | SNRPB2       |   | 20 Homo sapiens MGC45309; M     | 0.00017978 | 0.00038445 | 1.08642399 |
| SEC16A      | NM_014866.1 | SEC16A       |   | 9 Homo sapiens RP11-413M3.1     | 0.02504225 | 0.02501659 | 1.08617524 |
| TSPAN3      | NM_198902.1 | TSPAN3       |   | 15 Homo sapiens TM4-A; TSPAN    | 0.00150275 | 0.00227134 | 1.08604781 |
| CLINT1      | NM_014666.2 | CLINT1       |   | 5 Homo sapiens KIAA0171; EP:    | 0.00628711 | 0.00774436 | 1.08601543 |
| LOC728791   | XR_015547.2 | LOC728791    |   | PREDICTED: Homo sapiens n       | 0.02966925 | 0.02874536 | 1.08577371 |
| COPA        | NM_004371.2 | COPA         |   | 1 Homo sapiens FLJ26320; HEI    | 0.00192733 | 0.00280577 | 1.08555195 |
| RPS6KB1     | NM_003161.2 | RPS6KB1      |   | 17 Homo sapiens p70-alpha; p7   | 0.02053598 | 0.02108386 | 1.08487272 |
| MRPS10      | NM_018141.2 | MRPS10       |   | 6 Homo sapiens FLJ10567; PN/    | 0.00043231 | 0.00079754 | 1.08475298 |
| LOC441131   | XR_038026.1 | LOC441131    |   | PREDICTED: Homo sapiens n       | 0.03646138 | 0.0340985  | 1.08472333 |
| LOC10013224 | NM_00113586 | LOC10013224  |   | 16 Homo sapiens similar to Uncl | 0.00773961 | 0.00921277 | 1.08449955 |
| PWP1        | NM_007062.1 | PWP1         |   | 12 Homo sapiens IEF-SSP-9502    | 0.00166922 | 0.0024819  | 1.0844735  |
| PRPF4       | NM_004697.3 | PRPF4        |   | 9 Homo sapiens HPRP4P; PRP4     | 0.00141181 | 0.00215655 | 1.08403269 |
| LOC10013030 | XR_036947.1 | LOC100130308 |   | PREDICTED: Homo sapiens n       | 0.01074321 | 0.01218471 | 1.08365797 |
| RRP7A       | NM_015703.3 | RRP7A        |   | 22 Homo sapiens MGC150422; I    | 0.00953666 | 0.01103014 | 1.0830585  |
| QDPR        | NM_000320.1 | QDPR         |   | 4 Homo sapiens FLJ42391; DH     | 0.00353011 | 0.00470789 | 1.08250623 |
| VAMP3       | NM_004781.3 | VAMP3        |   | 1 Homo sapiens CEB              | 0.02867174 | 0.02792384 | 1.08125545 |
| LOC643384   | XR_016363.2 | LOC643384    |   | 4 PREDICTED: Homo sapiens h     | 0.04282176 | 0.03899514 | 1.08117177 |
| AGPAT2      | NM_00101272 | AGPAT2       |   | 9 Homo sapiens LPAAB; LPAAT-    | 0.04375893 | 0.03972076 | 1.08111592 |



## 5.0 ACL-Dependent Upreg

|             |                          |                                |            |            |            |
|-------------|--------------------------|--------------------------------|------------|------------|------------|
| SAMM50      | NM_015380.3 SAMM50       | 22 Homo sapiens OMP85; TOB5    | 0.00657341 | 0.00802938 | 1.08055218 |
| PRDX2       | NM_181738.1 PRDX2        | 19 Homo sapiens TDPX1; MGC4    | 0.00418843 | 0.00545646 | 1.07976317 |
| CTGLF3      | NM_00107766 CTGLF3       | Homo sapiens BA324H6.1         | 0.02830695 | 0.02764527 | 1.07846494 |
| GTF2F2      | NM_004128.1 GTF2F2       | 13 Homo sapiens TF2F2; BTF4;   | 0.00320815 | 0.00432851 | 1.07837902 |
| DUSP5       | NM_004419.3 DUSP5        | 10 Homo sapiens HVH3; DUSP     | 0.0032326  | 0.00435614 | 1.07830461 |
| ADM         | NM_001124.1 ADM          | 11 Homo sapiens AM             | 0.00026213 | 0.00052582 | 1.07826729 |
| EIF3G       | NM_003755.2 EIF3G        | 19 Homo sapiens EIF3S4; EIF3-  | 0.00074011 | 0.00124735 | 1.07826155 |
| POLRMT      | NM_005035.2 POLRMT       | 19 Homo sapiens h-mtRPOL; MT   | 0.04772477 | 0.04271084 | 1.07747976 |
| ROBLD3      | NM_014017.2 ROBLD3       | Homo sapiens roadblock dorr    | 0.00185095 | 0.00271032 | 1.07690525 |
| RFNG        | NM_002917.1 RFNG         | 17 Homo sapiens RFNG O-fucos'  | 0.05168737 | 0.04556466 | 1.07647932 |
| PMPCB       | NM_004279.1 PMPCB        | 7 Homo sapiens Beta-MPP; MP    | 0.00632178 | 0.00777397 | 1.07638927 |
| DERL1       | NM_024295.3 DERL1        | 8 Homo sapiens DER-1; FLJ42    | 0.04095056 | 0.03754836 | 1.07554711 |
| TYK2        | NM_003331.3 TYK2         | 19 Homo sapiens JTK1           | 0.02813641 | 0.02751548 | 1.07532464 |
| ANAPC4      | NM_013367.2 ANAPC4       | 4 Homo sapiens APC4            | 0.04404154 | 0.03994423 | 1.07460041 |
| LOC10013436 | XM_00171381 LOC100134364 | PREDICTED: Homo sapiens h      | 0.00212833 | 0.00305779 | 1.07452625 |
| LOC647340   | NM_005174.2 LOC647340    | PREDICTED: Homo sapiens s      | 0.000652   | 0.00112016 | 1.07401547 |
| CPSF3       | NM_016207.2 CPSF3        | 2 Homo sapiens CPSF; CPSF73    | 0.01537291 | 0.01647715 | 1.07221212 |
| TSG101      | NM_006292.2 TSG101       | 11 Homo sapiens VPS23; TSG1    | 0.01623662 | 0.01725953 | 1.07107848 |
| NRD1        | NM_002525.1 NRD1         | 1 Homo sapiens hNRD2; hNRD     | 0.00562831 | 0.00703759 | 1.07054504 |
| PCID2       | NM_018386.1 PCID2        | 13 Homo sapiens MGC16774; FI   | 0.00053022 | 0.00094537 | 1.0695762  |
| NIPA2       | NM_030922.5 NIPA2        | 15 Homo sapiens MGC5466        | 0.03062644 | 0.02947744 | 1.06876046 |
| LOC440353   | NR_002603.1 LOC440353    | 16 Homo sapiens nuclear pore c | 0.00304178 | 0.00413584 | 1.06716371 |
| PIGY        | NM_032906.2 PIGY         | 4 Homo sapiens MGC14156; PI    | 0.00094037 | 0.00152623 | 1.06710004 |
| COQ10B      | NM_025147.2 COQ10B       | 2 Homo sapiens FLJ13448        | 0.02687237 | 0.02650682 | 1.06668323 |
| STT3A       | NM_152713.2 STT3A        | 11 Homo sapiens STT3-A; TMC;   | 0.00207038 | 0.00298431 | 1.06652211 |
| GRSF1       | NM_002092.2 GRSF1        | 4 Homo sapiens FLJ13125        | 0.02982298 | 0.02885925 | 1.06607448 |
| ZNF598      | NM_178167.2 ZNF598       | 16 Homo sapiens FLJ00086; DK   | 0.05036138 | 0.04456588 | 1.06556778 |
| SLC16A3     | NM_004207.2 SLC16A3      | 17 Homo sapiens MCT3; MGC13    | 0.00483718 | 0.00616971 | 1.06407096 |
| PSMB7       | NM_002799.2 PSMB7        | 9 Homo sapiens Z               | 0.00204006 | 0.00294497 | 1.06312632 |
| ATP6V1G1    | NM_004888.2 ATP6V1G1     | 9 Homo sapiens Vma10; ATP6J    | 0.00822406 | 0.00972217 | 1.06286938 |
| ODC1        | NM_002539.1 ODC1         | 2 Homo sapiens ornithine deca  | 0.00248294 | 0.00347731 | 1.06282805 |
| LOC646630   | XM_929572.1 LOC646630    | 13 PREDICTED: Homo sapiens s   | 0.01062853 | 0.01208589 | 1.06198905 |
| SS18L2      | NM_016305.1 SS18L2       | 3 Homo sapiens KIAA-iso        | 0.00108033 | 0.00171873 | 1.06123087 |
| LOC728324   | XR_015322.2 LOC728324    | PREDICTED: Homo sapiens n      | 0.03626138 | 0.03394764 | 1.06084753 |
| COPS5       | NM_006837.2 COPS5        | 8 Homo sapiens MGC3149; SG     | 0.00279753 | 0.00384185 | 1.06060903 |
| EIF3M       | NM_006360.3 EIF3M        | 11 Homo sapiens FLJ29030; GA   | 0.00250314 | 0.0034989  | 1.06030094 |
| ZRANB2      | NM_005455.3 ZRANB2       | 1 Homo sapiens DKFZp686J18:    | 0.04058167 | 0.03724515 | 1.05949369 |
| MAGED1      | NM_006986.3 MAGED1       | Homo sapiens NRAGE; DLX1       | 0.01819567 | 0.01900128 | 1.05866839 |
| COPB1       | NM_016451.3 COPB1        | 11 Homo sapiens DKFZp761K10    | 0.01028586 | 0.01174953 | 1.05815764 |
| FAM39DP     | XM_925777.1 FAM39DP      | Homo sapiens FLJ25222          | 0.04686205 | 0.04202879 | 1.058003   |
| YWHAG       | NM_012479.2 YWHAG        | 7 Homo sapiens 14-3-3GAMMA     | 0.02217016 | 0.02253226 | 1.05599778 |
| EIF3E       | NM_001568.1 EIF3E        | 8 Homo sapiens eIF3e; INT6; e  | 0.00159469 | 0.00238728 | 1.05584006 |
| LOC650276   | XM_939363.1 LOC650276    | PREDICTED: Homo sapiens s      | 0.00696153 | 0.00841909 | 1.05344976 |
| VPS26A      | NM_00103526 VPS26A       | 10 Homo sapiens PEP8A; Hbeta!  | 0.02346872 | 0.02367923 | 1.05287272 |
| ANAPC5      | NM_016237.3 ANAPC5       | 12 Homo sapiens APC5; PDL-10;  | 0.02051489 | 0.02106714 | 1.0524925  |
| CYBA        | NM_000101.2 CYBA         | 16 Homo sapiens cytochrome b-  | 0.00669417 | 0.00815192 | 1.05213034 |
| MMADHC      | NM_015702.2 MMADHC       | 2 Homo sapiens methylmalonic   | 0.03956246 | 0.03651983 | 1.0519155  |
| TIMM23      | NM_006327.2 TIMM23       | 10 Homo sapiens PRO1197; TIM   | 0.005002   | 0.00635223 | 1.05138759 |
| C2orf25     | NM_015702.1 C2ORF25      | 2 Homo sapiens CL25022         | 0.00725915 | 0.0087249  | 1.05088862 |
| LOC613037   | NR_002473.1 LOC613037    | 16 Homo sapiens nuclear pore c | 0.03968891 | 0.03659805 | 1.04951081 |
| LOC730187   | XR_042419.1 LOC730187    | PREDICTED: Homo sapiens n      | 0.01113578 | 0.01256498 | 1.04738709 |
| CIRBP       | NM_001280.1 CIRBP        | 19 Homo sapiens CIRP           | 0.03181567 | 0.03044173 | 1.04734685 |
| SNRNP70     | NM_003089.4 SNRNP70      | 19 Homo sapiens U1AP; RPU1; l  | 0.01258321 | 0.01391544 | 1.04702552 |
| SQSTM1      | NM_003900.3 SQSTM1       | 5 Homo sapiens OSIL; p62B; p   | 0.00736956 | 0.00884548 | 1.04693055 |
| OAZ1        | NM_004152.2 OAZ1         | 19 Homo sapiens OAZ; MGC138    | 0.01056494 | 0.01203229 | 1.04618851 |
| PTS         | NM_000317.1 PTS          | 11 Homo sapiens PTPS           | 0.04992846 | 0.04426762 | 1.04613313 |
| PPP2CA      | NM_002715.2 PPP2CA       | 5 Homo sapiens PP2CA; RP-C;    | 0.00545054 | 0.00684066 | 1.04493802 |
| GDI2        | NM_001494.2 GDI2         | 10 Homo sapiens FLJ37352; FLJ  | 0.04084562 | 0.03746678 | 1.04458815 |
| RPRC1       | NM_018067.2 RPRC1        | 1 Homo sapiens PARCC1; FLJ1    | 0.0145892  | 0.01574485 | 1.04438436 |
| DNAJA2      | NM_005880.2 DNAJA2       | 16 Homo sapiens RDJ2; DNAJ; I  | 0.03922449 | 0.0362498  | 1.04391893 |
| IMMT        | NM_006839.1 IMMT         | 2 Homo sapiens PIG4; P87/89;   | 0.01857269 | 0.01933517 | 1.04339125 |
| HGS         | NM_004712.3 HGS          | 17 Homo sapiens HRS; ZFYVE8    | 0.04313096 | 0.03923191 | 1.04300477 |
| RPL36AL     | NM_001001.3 RPL36AL      | 14 Homo sapiens RPL36A; MGC:   | 0.0064155  | 0.00786607 | 1.04285031 |
| NDUFS4      | NM_002495.1 NDUFS4       | 5 Homo sapiens AQDQ            | 0.01537776 | 0.01648033 | 1.04270528 |
| ETF1        | NM_004730.1 ETF1         | 5 Homo sapiens ERF; TB3-1; R   | 0.02561652 | 0.02546559 | 1.0425116  |
| POLR1D      | NM_015972.1 POLR1D       | 13 Homo sapiens MGC9850; RP/   | 0.0303764  | 0.02930751 | 1.04250266 |
| RAB7A       | NM_004637.5 RAB7A        | 3 Homo sapiens PSN; CMT2B;     | 0.05104921 | 0.04510178 | 1.04242241 |
| NDUFV2      | NM_021074.1 NDUFV2       | 18 Homo sapiens NADH dehydr    | 0.05294456 | 0.0464675  | 1.04222941 |
| RPL5        | NM_000969.3 RPL5         | 1 Homo sapiens MSTP030; MG     | 0.0187531  | 0.0194906  | 1.04211065 |
| ZDHHC6      | NM_022494.1 ZDHHC6       | 10 Homo sapiens ZNF376; FLJ2:  | 0.02759703 | 0.02707855 | 1.04195934 |

## 5.0 ACL-Dependent Upreg

|           |             |           |    |                             |            |            |            |
|-----------|-------------|-----------|----|-----------------------------|------------|------------|------------|
| C19orf70  | NM_205767.1 | C19ORF70  | 19 | Homo sapiens chromosome 1   | 0.04096913 | 0.03755753 | 1.04134116 |
| NDUFA2    | NM_002488.3 | NDUFA2    | 5  | Homo sapiens B8; CD14       | 0.04150921 | 0.03798121 | 1.03893941 |
| AKR1A1    | NM_153326.1 | AKR1A1    | 1  | Homo sapiens ALR; ALDR1; I  | 0.04604736 | 0.04145065 | 1.03826435 |
| EBNA1BP2  | NM_006824.1 | EBNA1BP2  | 1  | Homo sapiens P40; NOBP; EI  | 0.01882269 | 0.01955598 | 1.03823325 |
| CHCHD2    | NM_016139.2 | CHCHD2    | 7  | Homo sapiens C7orf17        | 0.02156902 | 0.02199774 | 1.03753911 |
| FABP5L2   | XM_00172117 | FABP5L2   |    | PREDICTED: Homo sapiens f   | 0.04201737 | 0.03839013 | 1.03351211 |
| YWHAH     | NM_003405.3 | YWHAH     | 22 | Homo sapiens YWHA1          | 0.03979099 | 0.03667677 | 1.03203572 |
| SNRPD2    | NM_177542.1 | SNRPD2    | 19 | Homo sapiens SMD2; SNRPD    | 0.03106476 | 0.02982407 | 1.0310281  |
| LOC442454 | XM_928047.1 | LOC442454 |    | Homo sapiens ubiquinol-cyto | 0.03309484 | 0.03139859 | 1.02739771 |

## 5.0 ACL-Indepen Upreg

| SYMBOL      | SEARCH_KEY  | ILMN_GENE   | CHROMOSOME | DEFINITION   | SYNONYMS                   | pval       | fdr        | fold       |
|-------------|-------------|-------------|------------|--------------|----------------------------|------------|------------|------------|
| ATP2B1      | NM_00100132 | ATP2B1      | 12         | Homo sapiens | PMCA1; PMCA                | 0.00093674 | 0.00152146 | 706.059201 |
| CEND1       | NM_016564.2 | CEND1       | 11         | Homo sapiens | FLJ90066; MG               | 1.3794E-07 | 1.7022E-06 | 352.769537 |
| ABCA3       | NM_001089.1 | ABCA3       | 16         | Homo sapiens | ABC-C; EST11               | 0.00020194 | 0.00042287 | 288.410347 |
| ZNF219      | NM_016423.1 | ZNF219      | 14         | Homo sapiens | ZFP219                     | 0.01314166 | 0.01443477 | 259.453513 |
| SLMO2       | NM_016045.2 | SLMO2       | 20         | Homo sapiens | C2orf45; PRE               | 0.02480467 | 0.02482447 | 242.393802 |
| SPRYD4      | NM_207344.1 | SPRYD4      | 12         | Homo sapiens | DKFZp686N08                | 0.0006274  | 0.00108641 | 200.768846 |
| ARV1        | NM_022786.1 | ARV1        | 1          | Homo sapiens | ARV1 homolog               | 0.00075081 | 0.00126247 | 188.445374 |
| MYO19       | NM_00103358 | MYO19       | 17         | Homo sapiens | FLJ22865; MY               | 2.1689E-06 | 1.1893E-05 | 185.588421 |
| LOC128322   | XM_060943.1 | LOC128322   |            |              | PREDICTED: Homo sapiens s  | 0.00192334 | 0.00280229 | 185.116231 |
| FAS         | NM_152871.1 | FAS         | 10         | Homo sapiens | CD95; APT1; F              | 0.00157518 | 0.00236128 | 173.718915 |
| TES         | NM_015641.2 | TES         | 7          | Homo sapiens | DKFZP586B20                | 0.0001178  | 0.00027278 | 155.684411 |
| GRHL2       | NM_024915.1 | GRHL2       | 8          | Homo sapiens | DFNA28; BOM                | 5.0791E-06 | 2.2598E-05 | 143.832684 |
| CORO6       | NM_032854.1 | CORO6       | 17         | Homo sapiens | FLJ14871                   | 8.8631E-05 | 0.00021771 | 84.6526229 |
| LOC10013145 | XM_00172348 | LOC10013145 |            |              | PREDICTED: Homo sapiens h  | 0.00028804 | 0.00056793 | 77.7988979 |
| EFR3B       | NM_014971.1 | EFR3B       | 15         | Homo sapiens | EFR3 homolog               | 0.00775581 | 0.0092283  | 69.4176191 |
| RSF1        | NM_016578.3 | RSF1        | 11         | Homo sapiens | HBXAP; p325;               | 3.4393E-06 | 1.6905E-05 | 64.5770184 |
| KLRC2       | NM_002260.3 | KLRC2       | 12         | Homo sapiens | NKG2-C; CD1!               | 5.3929E-08 | 8.9616E-07 | 61.1618319 |
| WNT10B      | NM_003394.2 | WNT10B      | 12         | Homo sapiens | WNT-12                     | 5.0591E-05 | 0.00013802 | 58.8049003 |
| LOC652669   | XM_942246.1 | LOC652669   |            |              | PREDICTED: Homo sapiens s  | 0.00115367 | 0.00181762 | 53.4012134 |
| ARC         | NM_015193.3 | ARC         | 8          | Homo sapiens | KIAA0278                   | 6.9377E-08 | 1.0642E-06 | 50.923036  |
| DNAJC2      | NM_014377.1 | DNAJC2      | 7          | Homo sapiens | MPP11; MPHO                | 0.00011913 | 0.00027507 | 49.6327792 |
| LRRC49      | NM_017691.2 | LRRC49      | 15         | Homo sapiens | FLJ20156                   | 1.7172E-08 | 4.4314E-07 | 48.7774929 |
| DNAJC1      | NM_022365.2 | DNAJC1      | 10         | Homo sapiens | MGC131954; I               | 0.00018601 | 0.00039583 | 48.7160439 |
| GFPT2       | NM_005110.1 | GFPT2       | 5          | Homo sapiens | GFAT2; FLJ10:              | 7.6327E-08 | 1.1293E-06 | 44.3158228 |
| DNA2        | NM_00108044 | DNA2        | 10         | Homo sapiens | KIAA0083; DN               | 0.00105542 | 0.0016849  | 42.0813673 |
| PKNOX1      | NM_004571.3 | PKNOX1      | 21         | Homo sapiens | PREP1; pknx                | 8.2101E-05 | 0.00020418 | 39.927133  |
| UTS2        | NM_006786.2 | UTS2        | 1          | Homo sapiens | UCN2; PRO10                | 1.3E-06    | 8.124E-06  | 39.433322  |
| TM4SF18     | NM_138786.1 | TM4SF18     | 3          | Homo sapiens | L6D                        | 0.00014357 | 0.00032019 | 38.480313  |
| SCFD2       | NM_152540.3 | SCFD2       | 4          | Homo sapiens | STXBP1L1; FL               | 0.01214633 | 0.01351064 | 37.7367237 |
| C14orf132   | NM_020215.2 | C14ORF132   | 14         | Homo sapiens | DKFZp761F20                | 1.4071E-06 | 8.6517E-06 | 36.8344284 |
| FAR2        | NM_018099.3 | FAR2        | 12         | Homo sapiens | FAR2; FLJ104               | 3.381E-06  | 1.6656E-05 | 36.3573977 |
|             | Hs.98330    | Hs.98330    |            |              | PREDICTED: Homo sapiens h  | 0.00014798 | 0.00032837 | 36.1176854 |
| KAT2B       | NM_003884.4 | KAT2B       | 3          | Homo sapiens | KAT2B; P; P/C              | 0.01982909 | 0.02047069 | 35.7887167 |
| MGC42630    | NM_175923.3 | MGC42630    | 9          | Homo sapiens | hypothetical p             | 0.00692435 | 0.00838221 | 35.4247189 |
| SEMA3C      | NM_006379.2 | SEMA3C      | 7          | Homo sapiens | SEMAE; SemE                | 6.7352E-06 | 2.8033E-05 | 35.355159  |
| HEG1        | XM_087386.8 | HEG1        | 3          | Homo sapiens | KIAA1237; MS               | 5.5864E-07 | 4.4237E-06 | 35.2615246 |
| RCC1        | NM_001269.3 | RCC1        | 1          | Homo sapiens | RCC1-I; CHC1               | 9.1519E-07 | 6.2782E-06 | 33.3697987 |
| C9orf82     | NM_024828.2 | C9ORF82     | 9          | Homo sapiens | RP11-337A23.               | 8.6889E-05 | 0.00021427 | 32.309599  |
| LOC10013430 | XM_00172071 | LOC10013430 |            |              | PREDICTED: Homo sapiens h  | 0.0001546  | 0.00034109 | 32.1068769 |
| FLJ20674    | NM_019086.2 | FLJ20674    | 12         | Homo sapiens | hypothetical p             | 0.00254578 | 0.00354889 | 30.4961551 |
| NEBL        | NM_006393.1 | NEBL        | 10         | Homo sapiens | MGC119747; I               | 1.5169E-05 | 5.2982E-05 | 30.4831912 |
| SLC36A1     | NM_078483.2 | SLC36A1     | 5          | Homo sapiens | TRAMD3; PAT:               | 2.5877E-08 | 5.7479E-07 | 29.7143137 |
| MYBBP1A     | NM_014520.1 | MYBBP1A     |            |              | Homo sapiens PAP2; P160; F | 0.00089528 | 0.00146306 | 28.7663913 |
| CARD8       | NM_014959.1 | CARD8       | 19         | Homo sapiens | NDPP1; CARD:               | 0.00049743 | 0.00089619 | 28.516217  |
| CHAF1A      | NM_005483.2 | CHAF1A      | 19         | Homo sapiens | MGCC71229; C:              | 0.0093934  | 0.01089173 | 27.7138869 |
| KRT222      | NM_152349.1 | KRT222      | 17         | Homo sapiens | KA21; MGC45.               | 2.8546E-05 | 8.6815E-05 | 27.2410844 |
| CHRNA10     | NM_020402.2 | CHRNA10     | 11         | Homo sapiens | cholinergic rec            | 0.00645842 | 0.00790985 | 26.9797719 |
| C14orf45    | NM_025057.1 | C14ORF45    | 14         | Homo sapiens | FLJ23189                   | 6.8323E-05 | 0.00017528 | 26.7130657 |
| GPRIN1      | NM_052899.1 | GPRIN1      | 5          | Homo sapiens | KIAA1893; GR               | 4.3444E-07 | 3.7115E-06 | 26.4904376 |
| LOC644739   | XM_929457.1 | LOC644739   |            |              | PREDICTED: Homo sapiens s  | 0.00014722 | 0.00032701 | 26.4618875 |
| ALDH3B1     | NM_00103001 | ALDH3B1     | 11         | Homo sapiens | FLJ26433; ALI              | 3.996E-05  | 0.00011372 | 26.3981689 |
| LOC10013393 | XM_00171643 | LOC10013393 |            |              | PREDICTED: Homo sapiens s  | 0.0301343  | 0.02912839 | 26.0966311 |
| CD109       | NM_133493.1 | CD109       | 6          | Homo sapiens | FLJ38569; DK               | 4.2921E-06 | 2.001E-05  | 25.5174359 |
| PSORS1C1    | NM_014068.1 | PSORS1C1    | 6          | Homo sapiens | C6orf16; SEEk              | 0.00572496 | 0.00714216 | 25.099895  |
|             | Hs.505676   | Hs.505676   |            |              | Homo sapiens cDNA FLJ3377  | 2.9875E-08 | 6.1822E-07 | 25.0326825 |
| CCAR1       | NM_018237.2 | CCAR1       | 10         | Homo sapiens | RP11-437A18.               | 0.00553443 | 0.00693404 | 24.7111943 |
| SNCG        | NM_003087.1 | SNCG        | 10         | Homo sapiens | BCSG1; SR                  | 2.8047E-07 | 2.7404E-06 | 23.9373623 |
| LAMP3       | NM_014398.2 | LAMP3       | 3          | Homo sapiens | TSC403; DC-L               | 1.2239E-06 | 7.7927E-06 | 23.8372707 |
| PGF         | NM_002632.4 | PGF         | 14         | Homo sapiens | PGFL; PIGF-2;              | 0.0004367  | 0.00080445 | 23.7781933 |
| LOC442442   | XM_00171989 | LOC442442   |            |              | PREDICTED: Homo sapiens 6  | 0.01305254 | 0.01435305 | 23.5118872 |
| APOBEC3B    | NM_004900.3 | APOBEC3B    | 22         | Homo sapiens | FLJ21201; AP               | 0.00035238 | 0.00067242 | 23.1769613 |
| ESCO2       | NM_00101742 | ESCO2       | 8          | Homo sapiens | EFO2; RBS; 2:              | 0.00283525 | 0.00388573 | 22.2939653 |
| KIAA0513    | NM_014732.2 | KIAA0513    | 16         | Homo sapiens | KIAA0513 (KI               | 1.3622E-06 | 8.4348E-06 | 21.9958975 |
| CHMP7       | NM_152272.2 | CHMP7       | 8          | Homo sapiens | MGC29816                   | 0.00141484 | 0.00216004 | 21.6198299 |
| IL1RAPL1    | NM_014271.2 | IL1RAPL1    |            |              | Homo sapiens MRX34; IL1RA  | 0.00061608 | 0.00106997 | 20.6423458 |
| TXNRD2      | NM_145748.1 | TXNRD2      | 22         | Homo sapiens | TRXR2; TR3; 5              | 0.00373793 | 0.00494445 | 20.4563356 |
| TBC1D22A    | NM_014346.1 | TBC1D22A    | 22         | Homo sapiens | C22orf4; HSC:              | 0.00024801 | 0.00050198 | 20.3598266 |
| HM13        | NM_030789.2 | HM13        | 20         | Homo sapiens | MSTP086; H1:               | 0.00022022 | 0.00045389 | 19.8688203 |
| FAM149A     | NM_015398.1 | FAM149A     | 4          | Homo sapiens | DKFZP564J10:               | 0.01400581 | 0.0152182  | 19.4231751 |

## 5.0 ACL-Indepen Upreg

|             |             |             |                               |            |            |            |
|-------------|-------------|-------------|-------------------------------|------------|------------|------------|
| LOC400836   | XR_018904.2 | LOC400836   | PREDICTED: Homo sapiens n     | 0.05615251 | 0.04888689 | 19.3470847 |
| IVD         | NM_002225.2 | IVD         | 15 Homo sapiens ACAD2         | 0.00133159 | 0.00205224 | 19.1944749 |
| CHSY3       | NM_175856.4 | CHSY3       | 5 Homo sapiens CSS3; CHSY2    | 4.3874E-06 | 2.0346E-05 | 19.0984257 |
| SLC6A16     | NM_014037.2 | SLC6A16     | 19 Homo sapiens NTT5          | 0.01002731 | 0.0114991  | 18.7097528 |
| TFAP2E      | NM_178548.2 | TFAP2E      | 1 Homo sapiens MGC49007; AI   | 0.01395272 | 0.0151699  | 18.4810522 |
| FAM164A     | NM_016010.1 | FAM164A     | 8 Homo sapiens CGI-62         | 0.00011231 | 0.00026257 | 18.4012626 |
| ENPP5       | NM_021572.4 | ENPP5       | 6 Homo sapiens KIAA0879       | 8.0287E-09 | 2.7844E-07 | 18.2869775 |
| C12orf26    | NM_032230.1 | C12ORF26    | 12 Homo sapiens FLJ22789      | 4.72E-08   | 8.1683E-07 | 18.2096942 |
| PROM2       | NM_144707.1 | PROM2       | 2 Homo sapiens PROM-2; MGC    | 0.0034044  | 0.00455685 | 17.8902811 |
| METTL4      | NM_022840.2 | METTL4      | 18 Homo sapiens MGC117235; I  | 0.00059863 | 0.00104525 | 17.8322154 |
|             | Hs.444999   | HS.444999   | 15 BX114974 NCI_CGAP_Kid3 H   | 0.03630364 | 0.03397633 | 17.5035544 |
| FER1L4      | NR_001442.1 | FER1L4      | Homo sapiens dj309K20.1; F    | 0.00015498 | 0.00034158 | 16.900433  |
|             | Hs.435263   | HS.435263   | 13 NISC_gj03f04.y1 NCI_CGAP_  | 0.00042564 | 0.00078771 | 16.6932189 |
|             |             |             | Homo sapiens zinc finger 286  | 0.03053365 | 0.02942041 | 16.5551732 |
| ZNF286C     | NR_024508.1 | ZNF286C     | 1 Homo sapiens FLJ20202       | 1.9675E-05 | 6.5168E-05 | 16.4130436 |
| FAM46C      | NM_017709.2 | FAM46C      | 19 Homo sapiens BSMAP; C19or  | 1.7463E-08 | 4.4801E-07 | 16.3777779 |
| TMEM59L     | NM_012109.2 | TMEM59L     | 2 Homo sapiens mGPDH; GDH;    | 0.00097004 | 0.0015654  | 16.0001875 |
| GPD2        | NM_000408.2 | GPD2        | 14 Homo sapiens MGC102934; I  | 5.2265E-08 | 8.7848E-07 | 15.9695991 |
| SPATA7      | NM_018418.1 | SPATA7      | 2 Homo sapiens FLJ13391       | 0.00705533 | 0.00851609 | 15.6843596 |
| TMEM166     | NM_032181.1 | TMEM166     | 5 Homo sapiens MGC46448; FL   | 0.04052337 | 0.0372072  | 15.5290521 |
| C5orf34     | NM_198566.1 | C5ORF34     | 4 Homo sapiens NKX3B; NKX3-   | 7.7386E-05 | 0.00019433 | 15.1145035 |
| BAPX1       | NM_001189.2 | BAPX1       | Homo sapiens SRPUL; RESD)     | 0.00011727 | 0.00027176 | 14.9544541 |
| SRPX2       | NM_014467.1 | SRPX2       | X                             |            |            |            |
| LOC648982   | XM_938059.1 | LOC648982   | PREDICTED: Homo sapiens h     | 0.0016732  | 0.00248614 | 14.7331505 |
| SERPINE1    | NM_000602.1 | SERPINE1    | 7 Homo sapiens PAI; PAI-1; PA | 5.8326E-07 | 4.557E-06  | 14.3894131 |
| HMG2        | NM_00101588 | HMG2        | 12 Homo sapiens HMG1-C; HMG   | 0.00011945 | 0.00027565 | 14.3200071 |
| SIM2        | NM_005069.2 | SIM2        | 21 Homo sapiens MGC119447; S  | 0.01984316 | 0.02047558 | 13.8241474 |
| PARVB       | NM_00100382 | PARVB       | 22 Homo sapiens CGI-56        | 0.04820748 | 0.04306378 | 13.7448996 |
| MYOM3       | NM_152372.2 | MYOM3       | 1 Homo sapiens RP11-293P20.   | 1.2126E-06 | 7.7493E-06 | 13.6549151 |
| SLC22A17    | NM_016609.3 | SLC22A17    | 14 Homo sapiens BOIT; BOCT; h | 4.5853E-07 | 3.8389E-06 | 13.6399151 |
| LOC643233   | XM_926592.1 | LOC643233   | PREDICTED: Homo sapiens s     | 2.9993E-06 | 1.5203E-05 | 13.5465192 |
| IRF4        | NM_002460.1 | IRF4        | 6 Homo sapiens MUM1; LSIRF    | 0.01038344 | 0.01184866 | 13.3726437 |
| ZNF564      | NM_144976.2 | ZNF564      | 19 Homo sapiens MGC26914      | 8.9958E-05 | 0.0002201  | 13.3310864 |
| BEND3       | NM_00108045 | BEND3       | 6 Homo sapiens RP11-5919.2    | 3.7839E-05 | 0.0001091  | 13.0614762 |
| CCDC18      | NM_206886.2 | CCDC18      | 1 Homo sapiens dj717I23.1; N  | 0.00014063 | 0.0003151  | 12.9338726 |
| CRISPLD2    | NM_031476.1 | CRISPLD2    | 16 Homo sapiens DKFP434B04    | 2.1789E-11 | 1.2745E-08 | 12.7507643 |
|             | Hs.372654   | HS.372654   | 10 Homo sapiens cDNA: FLJ230  | 0.00121244 | 0.0018959  | 12.6478666 |
| PDLIM7      | NM_005451.3 | PDLIM7      | 5 Homo sapiens PDZ and LIM c  | 0.00011449 | 0.00026681 | 12.5509172 |
| SYK         | NM_003177.3 | SYK         | 9 Homo sapiens spleen tyrosin | 0.00034039 | 0.00065338 | 12.3612003 |
| NAPEPLD     | NM_198990.3 | NAPEPLD     | 7 Homo sapiens FMP30; NAPE-   | 3.9715E-05 | 0.0001131  | 12.2718662 |
| FGFR1OP     | NM_007045.2 | FGFR1OP     | 6 Homo sapiens FOP            | 0.00039413 | 0.00073906 | 12.1980126 |
| TMX4        | NM_021156.2 | TMX4        | 20 Homo sapiens DJ971N18.2; I | 1.5501E-05 | 5.395E-05  | 12.0419008 |
| TCIRG1      | NM_006019.2 | TCIRG1      | 11 Homo sapiens ATP6N1C; OC-  | 4.3684E-07 | 3.7248E-06 | 11.9423821 |
|             | Hs.573264   | HS.573264   | 6 BX104737 Soares_fetal_hear  | 0.00926852 | 0.01076542 | 11.7992145 |
| LOC10012847 | XM_00171568 | LOC10012847 | PREDICTED: Homo sapiens h     | 0.00339548 | 0.0045463  | 11.7967963 |
| UNC5C       | NM_003728.2 | UNC5C       | 4 Homo sapiens UNC5H3         | 0.03269158 | 0.03110006 | 11.7476916 |
| ESAM        | NM_138961.1 | ESAM        | 11 Homo sapiens W117m         | 2.4191E-07 | 2.4652E-06 | 11.5522497 |
| LOC648605   | XM_939593.1 | LOC648605   | PREDICTED: Homo sapiens s     | 0.02607306 | 0.02584039 | 11.4855277 |
| VPS39       | NM_015289.2 | VPS39       | 15 Homo sapiens VAM6; FLJ465  | 0.00355224 | 0.00473165 | 11.4198255 |
| DYNC2H1     | NM_00108046 | DYNC2H1     | 11 Homo sapiens DYH1B; FLJ11  | 1.3372E-05 | 4.7851E-05 | 11.3437187 |
| SMAD6       | NM_005585.2 | SMAD6       | 15 Homo sapiens MADH6; HsT1'  | 2.0183E-06 | 1.1294E-05 | 11.0701901 |
| PTPN9       | NM_002833.2 | PTPN9       | PREDICTED: Homo sapiens p     | 0.00039315 | 0.00073755 | 10.9901801 |
| MIR185      | NR_029706.1 | MIR185      | Homo sapiens microRNA 185     | 0.00112321 | 0.00177632 | 10.9671117 |
| CHD5        | NM_015557.1 | CHD5        | 1 Homo sapiens KIAA0444; DK   | 3.0425E-07 | 2.9111E-06 | 10.9522789 |
| HSH2D       | NM_032855.2 | HSH2D       | 19 Homo sapiens HSH2; ALX; FI | 2.8362E-06 | 1.4587E-05 | 10.8056892 |
| CAMK2D      | NM_172115.1 | CAMK2D      | 4 Homo sapiens MGC44911; C;   | 1.4602E-08 | 4.0289E-07 | 10.771715  |
| CPA4        | NM_016352.2 | CPA4        | 7 Homo sapiens CPA3           | 8.5609E-12 | 6.8284E-09 | 10.7106561 |
|             | Hs.539841   | HS.539841   | 14 ny62f03.s1 NCI_CGAP_GCB1   | 0.03937341 | 0.03636828 | 10.659012  |
| LOC653717   | XM_496034.2 | LOC653717   | PREDICTED: Homo sapiens s     | 0.00331605 | 0.00445627 | 10.6327877 |
| WFDC3       | NM_080614.1 | WFDC3       | 20 Homo sapiens WAP14; dJ447  | 0.00030735 | 0.00060033 | 10.5857317 |
| ZNF121      | NM_00100872 | ZNF121      | 19 Homo sapiens ZNF20; ZHC3;  | 0.00664883 | 0.00810347 | 10.4954896 |
| ZNF57       | NM_173480.1 | ZNF57       | 19 Homo sapiens ZNF424        | 0.00646084 | 0.00791171 | 10.3508134 |
| ZNF767      | NM_024910.1 | ZNF767      | 7 Homo sapiens MGC51818; FL   | 0.04441184 | 0.04023433 | 10.2495774 |
| TMTC4       | NM_032813.2 | TMTC4       | 13 Homo sapiens FLJ22153; FLJ | 0.0002013  | 0.00042183 | 10.1463738 |
| GUSBL2      | NM_206910.1 | GUSBL2      | 6 Homo sapiens b55C20.2; SM   | 0.00018384 | 0.00039189 | 10.120938  |
| FAM125B     | NM_00101170 | FAM125B     | 9 Homo sapiens FLJ00001; C9c  | 0.00081461 | 0.00135341 | 10.0530604 |
| B3GNT5      | NM_032047.3 | B3GNT5      | 3 Homo sapiens beta3Gn-T5; E  | 0.00010305 | 0.00024582 | 9.94863162 |
|             | Hs.202140   | HS.202140   | BX114021 NCI_CGAP_Lu24 f      | 4.3252E-07 | 3.706E-06  | 9.93997546 |
| KIAA1333    | NM_017769.2 | KIAA1333    | 14 Homo sapiens G2E3; FLJ203; | 0.00012493 | 0.00028628 | 9.915314   |
| LOC253039   | NR_024408.1 | LOC253039   | 9 Homo sapiens hypothetical L | 0.00011829 | 0.00027355 | 9.85117779 |
| GCNT3       | NM_004751.1 | GCNT3       | 15 Homo sapiens C2/4GnT; GnT  | 7.7134E-07 | 5.5337E-06 | 9.75446535 |

## 5.0 ACL-Indepen Upreg

|             |             |              |    |                              |            |            |            |
|-------------|-------------|--------------|----|------------------------------|------------|------------|------------|
| SNORA17     | NR_002958.1 | SNORA17      | 9  | Homo sapiens ACA17           | 0.03346592 | 0.03170608 | 9.66888467 |
| MIR330      | NR_029886.1 | MIR330       |    | Homo sapiens microRNA 330    | 0.02525996 | 0.02518533 | 9.46127135 |
| LOC10013251 | XM_00172519 | LOC100132510 |    | PREDICTED: Homo sapiens s    | 0.00508233 | 0.00644025 | 9.35323663 |
| ARL17P1     | NM_016632.1 | ARL17P1      | 17 | Homo sapiens ARF1P2; ARL1    | 0.02622443 | 0.02597574 | 9.31566395 |
| FBN3        | NM_032447.3 | FBN3         | 19 | Homo sapiens KIAA1776        | 0.0035907  | 0.00477056 | 9.30737146 |
| NPHP4       | NM_015102.2 | NPHP4        | 1  | Homo sapiens KIAA0673; SL    | 0.00042839 | 0.00079181 | 9.21609185 |
| NFRKB       | NM_006165.2 | NFRKB        | 11 | Homo sapiens DKFZp547B20     | 1.6622E-05 | 5.7104E-05 | 9.17241839 |
| GINS4       | NM_032336.1 | GINS4        | 8  | Homo sapiens MGC14799; SI    | 0.02068172 | 0.02121115 | 9.16581111 |
| CCDC92      | NM_025140.1 | CCDC92       | 12 | Homo sapiens FLJ22471        | 2.6539E-07 | 2.6193E-06 | 9.00288285 |
| PKP3        | NM_007183.2 | PKP3         | 11 | Homo sapiens plakophilin 3 ( | 3.1486E-06 | 1.5741E-05 | 8.89068786 |
| MSL1        | NM_00101224 | MSL1         | 17 | Homo sapiens DKFZp686J17.    | 8.3142E-05 | 0.00020648 | 8.78980295 |
| LOC652051   | XM_945171.1 | LOC652051    |    | PREDICTED: Homo sapiens h    | 0.00163561 | 0.00243979 | 8.73917199 |
| STARD8      | NM_014725.2 | STARD8       |    | Homo sapiens DKFZp686H16     | 0.02511461 | 0.02508031 | 8.69428169 |
| SLIT2       | NM_004787.1 | SLIT2        | 4  | Homo sapiens Slit-2; SLIL3;  | 5.6292E-05 | 0.00015022 | 8.56699675 |
| CDCA1       | NM_145697.1 | CDCA1        | 1  | Homo sapiens NUF2R           | 5.3672E-07 | 4.3046E-06 | 8.35236575 |
| HIST2H2AA3  | NM_003516.2 | HIST2H2AA3   | 1  | Homo sapiens MGC12a-615; H2A | 6.6205E-09 | 2.4103E-07 | 8.26992603 |
| SNORA28     | NR_002964.1 | SNORA28      | 14 | Homo sapiens ACA28           | 0.01037209 | 0.01184033 | 8.22959911 |
|             | Hs.20255    | HS.20255     | 2  | AV652851 GLC Homo sapien:    | 0.00771627 | 0.00918998 | 8.21601755 |
| DNER        | NM_139072.2 | DNER         | 2  | Homo sapiens bet; UNQ26      | 3.7859E-09 | 1.7483E-07 | 8.2018858  |
| PLA2G15     | NM_012320.3 | PLA2G15      | 16 | Homo sapiens DKFZp564A01     | 3.1879E-09 | 3.0011E-06 | 8.1116058  |
| COL1A1      | NM_000088.2 | COL1A1       | 17 | Homo sapiens OI4             | 3.7769E-07 | 3.3405E-06 | 8.03860365 |
| LOC10013172 | XM_00172015 | LOC10013172  | 4  | PREDICTED: Homo sapiens h    | 1.423E-06  | 8.713E-06  | 8.03483836 |
| METT10D     | NM_024086.2 | METT10D      | 17 | Homo sapiens MGC3329         | 0.0014689  | 0.00223055 | 7.96871658 |
| PITPNA      | NM_006224.2 | PITPNA       | 17 | Homo sapiens PITPN; VIB1A;   | 7.8816E-06 | 3.1534E-05 | 7.88777975 |
| GSTT2B      | NM_00108084 | GSTT2B       | 22 | Homo sapiens MGC87963; G     | 4.5319E-05 | 0.00012615 | 7.88761379 |
| FRYL        | XM_945291.1 | FRYL         | 4  | Homo sapiens FLJ16177; KIA   | 9.7371E-07 | 6.5921E-06 | 7.84493206 |
| ZNF805      | NM_00102356 | ZNF805       | 19 | Homo sapiens DKFZp686P08     | 0.00081945 | 0.00135965 | 7.77046773 |
| BBS4        | NM_033028.2 | BBS4         | 15 | Homo sapiens Bardet-Biedl s  | 1.5392E-05 | 5.3635E-05 | 7.65156816 |
| PPP1R9A     | XM_934519.1 | PPP1R9A      | 7  | PREDICTED: Homo sapiens p    | 0.01628951 | 0.01731155 | 7.64746935 |
| BMP8B       | NM_001720.3 | BMP8B        | 1  | Homo sapiens BMP8; MGC13     | 5.978E-05  | 0.00015713 | 7.63107548 |
| LOC731954   | XR_015662.2 | LOC731954    |    | PREDICTED: Homo sapiens s    | 0.00019597 | 0.00041323 | 7.5849759  |
| WDR91       | NM_014149.2 | WDR91        | 7  | Homo sapiens HSPC049         | 0.00038023 | 0.00071776 | 7.44967611 |
| FUT4        | NM_002033.2 | FUT4         | 11 | Homo sapiens FCT3A; ELFT;    | 1.0906E-06 | 7.1622E-06 | 7.44398891 |
| SNN         | NM_003498.3 | SNN          | 16 | Homo sapiens stannin (SNN)   | 1.4733E-05 | 5.1789E-05 | 7.42421272 |
| EFNB1       | NM_004429.3 | EFNB1        |    | Homo sapiens MGC8782; LEF    | 0.00385178 | 0.00507745 | 7.41413873 |
| ANKRD33     | NM_182608.2 | ANKRD33      | 12 | Homo sapiens DKFZp686O16     | 0.0015796  | 0.0023671  | 7.35775681 |
|             | Hs.22689    | HS.22689     |    | Homo sapiens mRNA; cDNA I    | 8.7031E-05 | 0.0002145  | 7.24577563 |
| RNF217      | NM_152553.2 | RNF217       | 6  | Homo sapiens C6orf172; MG    | 4.2641E-05 | 0.00011992 | 7.20066061 |
| WDR62       | NM_173636.3 | WDR62        | 19 | Homo sapiens FLJ33298; DK    | 0.01305667 | 0.01435579 | 7.19185915 |
| GALNT14     | NM_024572.2 | GALNT14      | 2  | Homo sapiens FLJ12691; Gal   | 0.01882893 | 0.01956015 | 7.04835545 |
| DNAJB12     | NM_00100276 | DNAJB12      | 10 | Homo sapiens DJ10; DKFZp5    | 0.00024034 | 0.00048927 | 6.96784569 |
| USH1G       | NM_173477.2 | USH1G        | 17 | Homo sapiens ANKS4A; FLJ3    | 0.01028938 | 0.01175202 | 6.96041596 |
| LOC10012929 | XR_038229.1 | LOC100129293 |    | PREDICTED: Homo sapiens n    | 0.00717661 | 0.00864226 | 6.95201803 |
| KIAA1881    | Hs.567652   | KIAA1881     |    | PREDICTED: Homo sapiens K    | 0.00067522 | 0.00115306 | 6.93751    |
| C1orf151    | NM_00103236 | C1ORF151     | 1  | Homo sapiens RP5-1056L3.2    | 0.0153799  | 0.01648061 | 6.87931272 |
| WBSCR16     | XM_933544.1 | WBSCR16      | 7  | Homo sapiens DKFZp434D04     | 2.98E-06   | 1.5148E-05 | 6.87305569 |
| LOC729887   | XR_040889.1 | LOC729887    |    | PREDICTED: Homo sapiens h    | 3.6767E-05 | 0.00010678 | 6.85236562 |
| LOC10013038 | XM_00171847 | LOC100130387 |    | PREDICTED: Homo sapiens s    | 0.02215857 | 0.0225257  | 6.81851108 |
| PRRT1       | NM_030651.2 | PRRT1        | 6  | Homo sapiens C6orf31; NG5    | 0.04930172 | 0.04382708 | 6.81052714 |
| LOC649445   | XM_00172079 | LOC649445    | 14 | PREDICTED: Homo sapiens s    | 0.01599762 | 0.01703229 | 6.78360876 |
| MIR599      | NR_030329.1 | MIR599       |    | Homo sapiens microRNA 599    | 0.00222432 | 0.00317491 | 6.74764556 |
| STXBP4      | NM_178509.5 | STXBP4       | 17 | Homo sapiens MGC149829; I    | 0.05446143 | 0.04763204 | 6.71624867 |
| C9orf25     | NM_147202.1 | C9ORF25      | 9  | Homo sapiens BA573M23.5;     | 1.9468E-05 | 6.4676E-05 | 6.6978486  |
| USP33       | NM_201626.1 | USP33        | 1  | Homo sapiens MGC16868; KI    | 0.00503996 | 0.00639304 | 6.69063635 |
| BMP1        | NM_006129.2 | BMP1         | 8  | Homo sapiens PCOLC; FLJ44-   | 0.00019576 | 0.00041297 | 6.67932013 |
| HIST1H2BD   | NM_138720.1 | HIST1H2BD    | 6  | Homo sapiens H2B.1B; HIRIF   | 1.1582E-12 | 2.5405E-09 | 6.66888487 |
| PLAT        | NM_000930.2 | PLAT         | 8  | Homo sapiens T-PA; DKFZp6    | 0.00599047 | 0.00742588 | 6.65706053 |
| LOC649025   | XM_938110.1 | LOC649025    |    | PREDICTED: Homo sapiens h    | 1.8609E-08 | 4.6918E-07 | 6.55751183 |
| RBMS2       | NM_002898.2 | RBMS2        | 12 | Homo sapiens SCR3            | 8.1774E-05 | 0.00020343 | 6.51319423 |
| LOC651511   | XM_940673.1 | LOC651511    |    | PREDICTED: Homo sapiens s    | 0.05188647 | 0.04569885 | 6.44612849 |
| LRIG1       | NM_015541.2 | LRIG1        | 3  | Homo sapiens LIG-1; LIG1; I  | 7.656E-07  | 5.5061E-06 | 6.43712141 |
| ZNF763      | NM_00101275 | ZNF763       | 19 | Homo sapiens ZNF; ZNF440L    | 0.01776285 | 0.01862689 | 6.42515313 |
| SEMA6A      | NM_020796.2 | SEMA6A       | 5  | Homo sapiens VIA; SEMAQ; !   | 3.8E-09    | 1.7456E-07 | 6.41690518 |
| FLJ36848    | NM_00100152 | FLJ36848     | 2  | PREDICTED: Homo sapiens h    | 0.00617864 | 0.00763111 | 6.40779642 |
| LOC646010   | XM_933332.1 | LOC646010    | 19 | PREDICTED: Homo sapiens h    | 0.00584928 | 0.0072745  | 6.40159592 |
| ABCF3       | NM_018358.1 | ABCF3        | 3  | Homo sapiens EST201864; F    | 1.3248E-05 | 4.7521E-05 | 6.39679309 |
| MSI2        | NM_170721.1 | MSI2         | 17 | Homo sapiens FLJ36569; MS    | 2.7648E-05 | 8.4819E-05 | 6.35792698 |
| LIFR        | NM_002310.3 | LIFR         | 5  | Homo sapiens CD118; STWS     | 0.00048295 | 0.00087459 | 6.35593575 |
| FAM75B      | NM_00109880 | FAM75B       | 9  | Homo sapiens C9orf36B; bA    | 6.3536E-05 | 0.00016493 | 6.3455582  |
| LOC441714   | XR_019458.2 | LOC441714    |    | PREDICTED: Homo sapiens n    | 0.00024756 | 0.00050128 | 6.32363836 |

## 5.0 ACL-Indepen Upreg

|             |             |             |   |    |                              |            |            |            |
|-------------|-------------|-------------|---|----|------------------------------|------------|------------|------------|
| RAB6B       | NM_016577.2 | RAB6B       |   | 3  | Homo sapiens RAB6B, memb     | 2.2915E-05 | 7.3297E-05 | 6.24191083 |
| TMLHE       | NM_018196.1 | TMLHE       | X |    | Homo sapiens FLJ10727; BB    | 0.02513346 | 0.02509057 | 6.23455227 |
| LEPR        | NM_002303.3 | LEPR        |   | 1  | Homo sapiens OBR; CD295      | 0.00047661 | 0.00086561 | 6.16800463 |
|             | Hs.550799   | HS.550799   |   | 1  | UI-CF-FNO-afv-g-21-0-UI.s1   | 0.00956841 | 0.01105521 | 6.15205744 |
| CD40        | NM_001250.3 | CD40        |   | 20 | Homo sapiens TNFRSF5; p50    | 9.5707E-05 | 0.00023146 | 6.14811729 |
| PLA2G10     | NM_003561.1 | PLA2G10     |   | 16 | Homo sapiens GXPLA2; SPLA    | 4.4709E-08 | 7.8771E-07 | 6.12747105 |
| SNORD110    | NR_003078.1 | SNORD110    |   | 20 | Homo sapiens HBII-55         | 0.05249264 | 0.04613547 | 6.08835605 |
| HPCAL4      | NM_016257.2 | HPCAL4      |   | 1  | Homo sapiens DKFZp761G12     | 9.2204E-09 | 3.076E-07  | 6.05055664 |
| LOC10013129 | XM_00171862 | LOC10013129 |   | 12 | PREDICTED: Homo sapiens s    | 0.00484709 | 0.00617966 | 6.03872699 |
|             | Hs.548302   | HS.548302   |   | 8  | AU253506 human favorable i   | 0.00136423 | 0.00209444 | 6.01821306 |
| C6orf57     | NM_145267.2 | C6ORF57     |   | 6  | Homo sapiens MGC104225       | 0.01740453 | 0.01833441 | 6.01383718 |
| LIMCH1      | NM_014988.1 | LIMCH1      |   | 4  | Homo sapiens DKFZp686B24     | 0.00079457 | 0.00132439 | 5.98301762 |
| SLC2A3      | NM_006931.1 | SLC2A3      |   | 12 | Homo sapiens GLUT3; FLJ90    | 1.0018E-10 | 2.6635E-08 | 5.97173311 |
| FANCA       | NM_000135.2 | FANCA       |   | 16 | Homo sapiens FAA; FA; FA1;   | 0.00047984 | 0.00087021 | 5.95398424 |
| FAM114A1    | NM_138389.1 | FAM114A1    |   | 4  | Homo sapiens Noxp20          | 0.00055976 | 0.00099158 | 5.93347503 |
| OR7E156P    | NR_002171.1 | OR7E156P    |   | 13 | Homo sapiens olfactory rece  | 0.0013128  | 0.00202755 | 5.8893548  |
| MIR21       | NR_029493.1 | MIR21       |   |    | Homo sapiens microRNA 21 (   | 0.0002339  | 0.0004785  | 5.88869256 |
| RFESD       | NM_173362.2 | RFESD       |   | 5  | Homo sapiens Rieske (Fe-S)   | 0.02211434 | 0.02248594 | 5.86342029 |
| HYAL3       | NM_003549.2 | HYAL3       |   | 3  | Homo sapiens LUCA14; Minn    | 5.0339E-07 | 4.1124E-06 | 5.79452373 |
| KIAA1345    | XM_944553.1 | KIAA1345    |   |    | PREDICTED: Homo sapiens K    | 0.00514558 | 0.00650725 | 5.73708669 |
| LOC646783   | XM_929735.1 | LOC646783   |   | 6  | PREDICTED: Homo sapiens h    | 0.03376734 | 0.03194336 | 5.71702588 |
| BEGAIN      | NM_020836.2 | BEGAIN      |   | 14 | Homo sapiens KIAA1446; BE    | 1.3305E-08 | 3.7658E-07 | 5.69579329 |
| TMPRSS12    | NM_182559.1 | TMPRSS12    |   | 12 | Homo sapiens MGC57341        | 0.00923424 | 0.0107384  | 5.68579985 |
| HERC6       | NM_00101300 | HERC6       |   | 4  | Homo sapiens FLJ20637        | 0.00294139 | 0.00401364 | 5.68176992 |
| OVOL2       | NM_021220.2 | OVOL2       |   | 20 | Homo sapiens EUROIMAGE5(     | 0.000162   | 0.00035429 | 5.67619492 |
| MGC18216    | XM_927732.1 | MGC18216    |   | 15 | PREDICTED: Homo sapiens h    | 2.4445E-06 | 1.3038E-05 | 5.66452105 |
| C7orf63     | NM_024788.2 | C7ORF63     |   | 7  | Homo sapiens chromosome 7    | 0.00257554 | 0.0035841  | 5.66331899 |
| DOK4        | NM_018110.2 | DOK4        |   | 16 | Homo sapiens FLJ10488        | 3.8067E-05 | 0.00010954 | 5.57664102 |
| CPNE7       | NM_153636.1 | CPNE7       |   | 16 | Homo sapiens MGC34192        | 8.9401E-05 | 0.00021911 | 5.51598997 |
| SERPINA3    | NM_001085.4 | SERPINA3    |   | 14 | Homo sapiens GIG24; GIG25    | 0.00953552 | 0.01103173 | 5.45879871 |
| RNF207      | NM_207396.2 | RNF207      |   | 1  | Homo sapiens FLJ46380; FLJ   | 0.04108039 | 0.03763986 | 5.44131869 |
| APOLD1      | NM_030817.1 | APOLD1      |   | 12 | Homo sapiens VERGE; DKFZI    | 1.7446E-05 | 5.9261E-05 | 5.42789136 |
| LOC730323   | XM_00172209 | LOC730323   |   | 7  | PREDICTED: Homo sapiens h    | 1.219E-06  | 7.773E-06  | 5.42357353 |
| GPR101      | NM_054021.1 | GPR101      | X |    | Homo sapiens GPCR6           | 0.03787916 | 0.03521794 | 5.41191556 |
| MPV17L2     | NM_032683.1 | MPV17L2     |   | 19 | Homo sapiens MGC110861; I    | 0.00015042 | 0.00033287 | 5.40862294 |
| ZMIZ2       | NM_031449.3 | ZMIZ2       |   | 7  | Homo sapiens DKFZp761I21;    | 2.4551E-09 | 1.4265E-07 | 5.3837727  |
| FAM13A      | NM_014883.2 | FAM13A      |   | 4  | Homo sapiens FLJ34562; MG    | 0.00034848 | 0.00066599 | 5.36346119 |
| CCNT2       | NM_001241.2 | CCNT2       |   | 2  | Homo sapiens FLJ90560; MG    | 0.00426689 | 0.0055373  | 5.32378201 |
| FLJ90757    | NM_00100433 | FLJ90757    |   | 17 | PREDICTED: Homo sapiens h    | 1.6115E-08 | 4.2461E-07 | 5.31520982 |
| TCEAL5      | NM_00101297 | TCEAL5      | X |    | Homo sapiens transcription e | 0.00954681 | 0.01103752 | 5.31467064 |
| ARHGAP11A   | NM_014783.2 | ARHGAP11A   |   | 15 | Homo sapiens GAP (1-12); K   | 0.00084812 | 0.00139693 | 5.30945423 |
| CKMT1B      | NM_020990.3 | CKMT1B      |   | 15 | Homo sapiens UMTCK; CKMT     | 2.9036E-09 | 1.5164E-07 | 5.30545549 |
| IFIT2       | NM_001547.3 | IFIT2       |   | 10 | Homo sapiens GARG-39; G1(    | 0.01281892 | 0.0141298  | 5.28744922 |
| LOC728285   | XM_937100.1 | LOC728285   |   | 17 | PREDICTED: Homo sapiens s    | 2.6393E-09 | 1.4294E-07 | 5.25771889 |
| FGD1        | NM_004463.2 | FGD1        | X |    | Homo sapiens ZFYVE3; AAS;    | 0.00529683 | 0.00667544 | 5.24660641 |
| WDR7        | NM_015285.2 | WDR7        |   | 18 | Homo sapiens TRAG; KIAA05    | 0.02347994 | 0.02368783 | 5.15521096 |
| TIFA        | NM_052864.2 | TIFA        |   | 4  | Homo sapiens MGC20791; T;    | 0.02962078 | 0.02870791 | 5.12560502 |
| LOC650034   | XM_939124.1 | LOC650034   |   |    | PREDICTED: Homo sapiens s    | 0.00247345 | 0.00346622 | 5.1143714  |
| LOC10013201 | XM_00171475 | LOC10013201 |   | 17 | PREDICTED: Homo sapiens h    | 0.04427502 | 0.04011866 | 5.11284577 |
| HSD11B2     | NM_000196.2 | HSD11B2     |   | 16 | Homo sapiens AME1; HSD2;     | 0.00232162 | 0.0032929  | 5.11100898 |
| C8orf83     | NR_015339.1 | C8ORF83     |   | 8  | Homo sapiens FLJ40637; DK    | 0.00014238 | 0.00031828 | 5.09368003 |
| SNORD60     | NR_002736.1 | SNORD60     |   | 16 | Homo sapiens RNU60; U60      | 0.00433126 | 0.00560344 | 5.08022792 |
| METTL10     | NM_212554.2 | METTL10     |   | 10 | Homo sapiens methyltransfer  | 0.00130851 | 0.00202306 | 5.05425706 |
| ZHX3        | NM_015035.3 | ZHX3        |   | 20 | Homo sapiens KIAA0395; TI)   | 6.0425E-06 | 2.5774E-05 | 5.03765692 |
| AP2A2       | NM_012305.2 | AP2A2       |   | 11 | Homo sapiens CLAPA2; HYPJ    | 0.00064292 | 0.00110782 | 5.02852474 |
| TCTA        | NM_022171.1 | TCTA        |   | 3  | Homo sapiens T-cell leukemi  | 3.5077E-08 | 6.9005E-07 | 5.01314508 |
| CTGF        | NM_001901.2 | CTGF        |   | 6  | Homo sapiens CCN2; MGC10     | 2.0752E-12 | 3.6415E-09 | 4.974264   |
| LOC10012970 | XR_036903.1 | LOC10012970 |   |    | PREDICTED: Homo sapiens n    | 0.00456548 | 0.00586924 | 4.9726037  |
|             | Hs.547277   | HS.547277   |   | 1  | zh47e08.r1 Soares_fetal_live | 0.00316223 | 0.00427773 | 4.96603274 |
| CCNYL1      | NM_152523.1 | CCNYL1      |   | 2  | Homo sapiens FLJ40432        | 5.3667E-07 | 4.3081E-06 | 4.96432108 |
| GSTM1       | NM_000561.2 | GSTM1       |   | 1  | Homo sapiens MGC26563; G     | 2.2425E-06 | 1.2206E-05 | 4.95197011 |
| LOC643802   | XM_00171926 | LOC643802   |   | 16 | PREDICTED: Homo sapiens s    | 0.00630599 | 0.00775673 | 4.94711275 |
| TDRD3       | NM_030794.1 | TDRD3       |   | 13 | Homo sapiens RP11-459E2.1    | 0.04582454 | 0.04129244 | 4.94345037 |
| PRKACB      | NM_207578.1 | PRKACB      |   | 1  | Homo sapiens PKACB; MGC4     | 0.00014751 | 0.00032757 | 4.93986525 |
| STAT4       | NM_003151.2 | STAT4       |   | 2  | Homo sapiens signal transdu  | 1.0514E-06 | 6.9573E-06 | 4.9383387  |
| SOC56       | NM_004232.2 | SOC56       |   | 18 | Homo sapiens STAT14; SOCS    | 0.04235494 | 0.03865026 | 4.93215982 |
| PIGQ        | NM_004204.2 | PIGQ        |   | 16 | Homo sapiens GPI1; c407A1)   | 1.8872E-07 | 2.0724E-06 | 4.92374625 |
| LOC653158   | XM_926814.1 | LOC653158   |   | 5  | PREDICTED: Homo sapiens s    | 1.1356E-06 | 7.3695E-06 | 4.89934466 |
| XRCC4       | NM_022406.1 | XRCC4       |   | 5  | Homo sapiens X-ray repair cc | 0.00631389 | 0.00776536 | 4.8910086  |
| LOC651745   | XM_944901.1 | LOC651745   |   |    | PREDICTED: Homo sapiens h    | 0.00093938 | 0.00152519 | 4.87610121 |

## 5.0 ACL-Indepen Upreg

|             |              |              |   |                                  |            |            |            |
|-------------|--------------|--------------|---|----------------------------------|------------|------------|------------|
| SNORD96B    | NR_004379.1  | SNORD96B     | X | Homo sapiens U96b                | 0.00322164 | 0.00434471 | 4.87029099 |
| NAV1        | NM_020443.2  | NAV1         |   | 1 Homo sapiens POMFIL3; KIA      | 0.00013657 | 0.00030734 | 4.85334717 |
| ZNF706      | NM_00104251  | ZNF706       |   | 8 Homo sapiens PNAS-113; HS      | 0.00078851 | 0.00131628 | 4.8412078  |
| MRM1        | NM_024864.3  | MRM1         |   | 17 Homo sapiens FLJ22578         | 0.02574401 | 0.02555759 | 4.81965309 |
| SMPDL3A     | NM_006714.2  | SMPDL3A      |   | 6 Homo sapiens yR36GH4.1; F      | 0.00023806 | 0.00048541 | 4.79678357 |
| HLA-DMB     | NM_002118.3  | HLA-DMB      |   | 6 Homo sapiens D6S221E; RIN      | 2.2038E-09 | 1.3428E-07 | 4.79387233 |
| SCG5        | NM_003020.1  | SCG5         |   | 15 Homo sapiens SgV; 7B2; P7E    | 3.0298E-05 | 9.0761E-05 | 4.76288558 |
| HES2        | NM_0193089.3 | HES2         |   | 1 Homo sapiens hairy and enh:    | 9.8052E-08 | 1.3677E-06 | 4.75545072 |
| C6orf191    | NM_00101087  | C6ORF191     |   | 6 Homo sapiens bA174C7.4         | 0.01683534 | 0.0178204  | 4.75495161 |
| KIAA0427    | NM_014772.1  | KIAA0427     |   | 18 Homo sapiens Gm672            | 8.5472E-07 | 5.966E-06  | 4.75223074 |
| FUT2        | NM_000511.3  | FUT2         |   | 19 Homo sapiens sej; Se2; SE     | 0.00014213 | 0.00031781 | 4.74478159 |
| WDHD1       | NM_00100839  | WDHD1        |   | 14 Homo sapiens AND-1            | 0.00032387 | 0.00062618 | 4.69866484 |
| FLJ35767    | NM_207459.1  | FLJ35767     |   | 17 Homo sapiens FLJ35767 prot    | 2.467E-12  | 3.6075E-09 | 4.6862401  |
| ZNF548      | NM_152909.2  | ZNF548       |   | 19 Homo sapiens FLJ32932         | 0.00126736 | 0.00196742 | 4.67946582 |
| TIGD2       | NM_145715.1  | TIGD2        |   | 4 Homo sapiens DKFZp667D13       | 0.0003671  | 0.00069597 | 4.67310075 |
| LOC644150   | XM_933686.1  | LOC644150    |   | 7 PREDICTED: Homo sapiens s      | 0.00052046 | 0.00093023 | 4.66500167 |
| SNX19       | NM_014758.1  | SNX19        |   | 11 Homo sapiens CHET8; DKFZ;     | 5.6623E-07 | 4.4677E-06 | 4.65286422 |
| RCAN3       | NM_013441.2  | RCAN3        |   | 1 Homo sapiens RCN3; hRCN3;      | 9.8161E-05 | 0.00023629 | 4.64663285 |
| LOC402677   | XM_943039.1  | LOC402677    |   | PREDICTED: Homo sapiens s        | 0.03192848 | 0.03052637 | 4.63651118 |
| NUDT6       | NM_007083.3  | NUDT6        |   | 4 Homo sapiens ASFGF2; gfg-1     | 0.00082535 | 0.00136841 | 4.6163951  |
| FAM108A3    | NM_00108042  | FAM108A3     |   | 1 Homo sapiens FAM108A2; C1      | 7.4615E-05 | 0.00018834 | 4.6040485  |
| LOC10013303 | XR_038070.1  | LOC10013303  |   | 9 PREDICTED: Homo sapiens n      | 0.0016456  | 0.00245219 | 4.6003703  |
| TRAF3       | NM_003300.2  | TRAF3        |   | 14 Homo sapiens CD40bp; CAP-     | 2.5879E-05 | 8.0291E-05 | 4.56856419 |
| ZSCAN29     | NM_152455.2  | ZSCAN29      |   | 15 Homo sapiens MGC129895; I     | 0.00973818 | 0.0112218  | 4.55506033 |
| ZNF792      | NM_175872.3  | ZNF792       |   | 19 Homo sapiens FLJ38451; MG     | 0.00954627 | 0.01103834 | 4.54024418 |
| ACOT8       | NM_183386.1  | ACOT8        |   | 20 Homo sapiens PTE1; hTE; HM    | 0.01592765 | 0.01697427 | 4.53209019 |
| DENND1A     | NM_020946.1  | DENND1A      |   | 9 Homo sapiens RP11-230L22.      | 2.3465E-06 | 1.2631E-05 | 4.51873981 |
| ABCC10      | NM_033450.2  | ABCC10       |   | 6 Homo sapiens MRP7; EST182      | 1.2221E-05 | 4.4677E-05 | 4.48721396 |
| PLEKHB1     | NM_021200.1  | PLEKHB1      |   | 11 Homo sapiens PHR1; PHRETJ     | 1.91E-10   | 3.8974E-08 | 4.482751   |
| DNAJC24     | NM_181706.3  | DNAJC24      |   | 11 Homo sapiens JJJ3; ZCSL3      | 0.00013447 | 0.00030354 | 4.48143639 |
|             | Hs.131087    | HS.131087    |   | 3 BX111162 Soares_testis_NH'     | 0.00724098 | 0.00870783 | 4.47617828 |
| LOC642946   | XM_931870.1  | LOC642946    |   | 1 PREDICTED: Homo sapiens h      | 3.6945E-05 | 0.00010709 | 4.4628947  |
| TNK1        | NM_003985.1  | TNK1         |   | 17 Homo sapiens MGC46193         | 0.0015552  | 0.00233693 | 4.45465333 |
| LOC645314   | XM_00172369  | LOC645314    |   | PREDICTED: Homo sapiens s        | 0.02568968 | 0.0255152  | 4.43798051 |
| SPAG1       | NM_172218.1  | SPAG1        |   | 8 Homo sapiens HSD-3.8; TPIE     | 0.00026715 | 0.00053345 | 4.4250577  |
| ATG4A       | NM_178271.1  | ATG4A        | X | Homo sapiens APG4A; AULT2        | 9.0419E-08 | 1.2796E-06 | 4.41857332 |
| PCBP4       | NM_033009.1  | PCBP4        |   | 3 Homo sapiens LP4; MCG10        | 0.00335999 | 0.00450772 | 4.41136784 |
| LOC652815   | XM_942488.1  | LOC652815    |   | PREDICTED: Homo sapiens s        | 0.02300198 | 0.02326984 | 4.40665707 |
| KIAA0460    | NM_015203.2  | KIAA0460     |   | 1 Homo sapiens FLJ32145; HS      | 0.00016379 | 0.00035695 | 4.40105296 |
| LOC643224   | XM_932725.1  | LOC643224    |   | 9 PREDICTED: Homo sapiens s      | 0.05260813 | 0.04622309 | 4.39497915 |
| C17orf97    | NM_00101367  | C17ORF97     |   | 17 Homo sapiens chromosome 1     | 4.4571E-05 | 0.00012423 | 4.39343353 |
| NCRNA00092  | NR_024129.1  | NCRNA00092   |   | 9 Homo sapiens non-protein cc    | 1.4045E-05 | 4.979E-05  | 4.39294705 |
|             | Hs.547601    | HS.547601    |   | 22 Homo sapiens full length inse | 2.8703E-07 | 2.8013E-06 | 4.38236546 |
| GAL3ST4     | NM_024637.3  | GAL3ST4      |   | 7 Homo sapiens FLJ12116; GA      | 2.5114E-05 | 7.8529E-05 | 4.37578438 |
| LOC10013326 | XM_00171557  | LOC100133264 |   | PREDICTED: Homo sapiens h        | 0.00687941 | 0.00833816 | 4.37291161 |
| DUSP8       | NM_004420.1  | DUSP8        |   | 11 Homo sapiens HVH-5; FLJ42!    | 0.00310486 | 0.00420727 | 4.34646392 |
| NSD1        | NM_022455.3  | NSD1         |   | 5 Homo sapiens DKFZp666C16       | 2.8218E-05 | 8.6055E-05 | 4.33824023 |
| CD47        | NM_00102508  | CD47         |   | 3 Homo sapiens OA3; MER6; I/     | 1.9016E-07 | 2.083E-06  | 4.33270462 |
| HOXC8       | NM_022658.3  | HOXC8        |   | 12 Homo sapiens HOX3; HOX3A      | 4.9575E-05 | 0.00013576 | 4.32761784 |
| C17orf106   | NM_00111332  | C17ORF106    |   | 17 Homo sapiens MGC54300; FL     | 0.03621911 | 0.03391893 | 4.30422798 |
| BBS7        | NM_018190.2  | BBS7         |   | 4 Homo sapiens FLJ10715; BB!     | 1.8597E-05 | 6.2326E-05 | 4.27944074 |
| KRT7        | NM_005556.3  | KRT7         |   | 12 Homo sapiens K7; MGC3625,     | 7.1009E-06 | 2.91E-05   | 4.27145079 |
| LOC651772   | XM_940995.1  | LOC651772    |   | PREDICTED: Homo sapiens h        | 0.01131317 | 0.01273402 | 4.25702138 |
| LOC643342   | XR_016301.2  | LOC643342    |   | 9 PREDICTED: Homo sapiens n      | 0.00037257 | 0.00070512 | 4.25561743 |
| LOC10012969 | XM_00171871  | LOC10012969  |   | 10 PREDICTED: Homo sapiens s     | 0.04566299 | 0.04118494 | 4.23708593 |
| LOC643109   | XM_932687.1  | LOC643109    |   | 2 PREDICTED: Homo sapiens h      | 0.03293437 | 0.03127001 | 4.23511128 |
| NKIRAS2     | NM_00100134  | NKIRAS2      |   | 17 Homo sapiens KBRAS2; MGC      | 5.0214E-06 | 2.2433E-05 | 4.23418161 |
| LRRC8C      | NM_032270.2  | LRRC8C       |   | 1 Homo sapiens LD158; FAD1!      | 0.00026932 | 0.00053644 | 4.22950968 |
| TMEM191B    | XM_938147.1  | TMEM191B     |   | 22 PREDICTED: Homo sapiens ti    | 0.00022869 | 0.00046871 | 4.21136961 |
| KIAA0319L   | NM_182686.1  | KIAA0319L    |   | 1 Homo sapiens PP791; RP4-7!     | 0.00141483 | 0.00216042 | 4.20230895 |
| NPAL3       | NM_020448.2  | NPAL3        |   | 1 Homo sapiens RP3-462O23.3      | 3.7814E-08 | 7.1814E-07 | 4.1881286  |
| SNORA72     | NR_002581.1  | SNORA72      |   | 8 Homo sapiens RNU72; U72        | 0.00140884 | 0.00215351 | 4.18793701 |
| LOC10013013 | XM_00172158  | LOC10013013  |   | 1 PREDICTED: Homo sapiens h      | 0.00102399 | 0.0016407  | 4.18371305 |
| LOC651643   | XM_940845.1  | LOC651643    |   | PREDICTED: Homo sapiens h        | 0.02584805 | 0.02564636 | 4.15682428 |
| C14orf147   | NM_138288.2  | C14ORF147    |   | 14 Homo sapiens MGC24447         | 4.9441E-06 | 2.2212E-05 | 4.12272202 |
| LOC643534   | XM_936822.2  | LOC643534    |   | PREDICTED: Homo sapiens s        | 0.00634167 | 0.00779079 | 4.10630485 |
| PRICKLE1    | NM_153026.1  | PRICKLE1     |   | 12 Homo sapiens MGC138902; I     | 4.2408E-05 | 0.00011957 | 4.08794065 |
| S100A5      | NM_002962.1  | S100A5       |   | 1 Homo sapiens S100D             | 0.01766683 | 0.01854616 | 4.08268117 |
| FZD4        | NM_012193.2  | FZD4         |   | 11 Homo sapiens FzE4; EVR1; C    | 6.8773E-10 | 7.6381E-08 | 4.06908994 |
| SERPINA5    | NM_000624.3  | SERPINA5     |   | 14 Homo sapiens PROCI; PAI3;     | 1.0695E-05 | 4.005E-05  | 4.05514669 |

## 5.0 ACL-Indepen Upreg

|             |                          |   |                                 |            |            |            |
|-------------|--------------------------|---|---------------------------------|------------|------------|------------|
| ATP6AP1L    | NM_00101797 ATP6AP1L     |   | 5 Homo sapiens MGC138396        | 7.2685E-08 | 1.092E-06  | 4.04747374 |
| PKD1P1      | XR_078513.1 PKD1P1       |   | PREDICTED: Homo sapiens p       | 0.01200553 | 0.01338116 | 4.04290144 |
| SLC38A6     | NM_153811.1 SLC38A6      |   | 14 Homo sapiens NAT-1; MGC10    | 0.0320961  | 0.03064322 | 4.04179741 |
| LOC730153   | XM_00171767 LOC730153    |   | 16 PREDICTED: Homo sapiens h    | 9.2032E-06 | 3.5541E-05 | 4.0364936  |
| UCN         | NM_003353.2 UCN          |   | 2 Homo sapiens MGC129974; l     | 0.00044742 | 0.0008192  | 4.0332751  |
| ADCK5       | NM_174922.3 ADCK5        |   | 8 Homo sapiens MGC126708; l     | 4.3015E-08 | 7.6866E-07 | 4.01874921 |
|             | Hs.582765 Hs.582765      |   | 6 DB304592 BRAWH3 Homo sa       | 0.04263153 | 0.0388582  | 3.99433009 |
| WWC3        | NM_015691.2 WWC3         | X | Homo sapiens BM042; KIAA1       | 9.0805E-05 | 0.00022168 | 3.98882763 |
| CA11        | NM_001217.3 CA11         |   | 19 Homo sapiens CARP2; CA-RP    | 1.8035E-06 | 1.0417E-05 | 3.98179691 |
| FAM83B      | NM_00101087 FAM83B       |   | 6 Homo sapiens FLJ30642; MG     | 0.00010411 | 0.00024789 | 3.96986588 |
| TMEM70      | NM_017866.3 TMEM70       |   | 8 Homo sapiens FLJ20533         | 4.7393E-05 | 0.00013064 | 3.94688871 |
| OLFML2A     | NM_182487.1 OLFML2A      |   | 9 Homo sapiens PRO34319; FL     | 0.0002833  | 0.00055996 | 3.93876943 |
| APOBEC3F    | NM_00100666 APOBEC3F     |   | 22 Homo sapiens KA6; BK150C2    | 0.01998943 | 0.02060229 | 3.93616006 |
|             | Hs.478682 Hs.478682      |   | 3 Homo sapiens cDNA FLJ3109     | 8.6641E-06 | 3.3922E-05 | 3.93323302 |
| SOX12       | NM_006943.2 SOX12        |   | 20 Homo sapiens SOX22           | 0.00021795 | 0.00045016 | 3.93167688 |
| RALGPS1     | NM_014636.1 RALGPS1      |   | 9 Homo sapiens KIAA0351; RA     | 1.5841E-06 | 9.4679E-06 | 3.93083377 |
| NUDT19      | XM_372723.4 NUDT19       |   | 19 PREDICTED: Homo sapiens n    | 0.05296293 | 0.04647897 | 3.92842226 |
| FLJ20444    | XM_928667.1 FLJ20444     |   | 9 PREDICTED: Homo sapiens h     | 0.00044817 | 0.00082042 | 3.92746514 |
| SNORA26     | NR_003016.1 SNORA26      |   | 4 Homo sapiens HBI-6            | 0.0004573  | 0.00083382 | 3.92693941 |
| DOC2A       | NM_003586.2 DOC2A        |   | 16 Homo sapiens double C2-like  | 0.00081281 | 0.00135093 | 3.92045396 |
| SCARNA18    | NR_003139.1 SCARNA18     |   | 5 Homo sapiens U109             | 2.5152E-07 | 2.525E-06  | 3.91905645 |
| LOC644672   | XM_927777.1 LOC644672    |   | PREDICTED: Homo sapiens s       | 0.03262098 | 0.03104637 | 3.90419855 |
| GDPD5       | NM_030792.4 GDPD5        |   | 11 Homo sapiens PP1665; GDE2    | 4.3411E-07 | 3.7123E-06 | 3.8983211  |
| SNORA79     | NR_003021.2 SNORA79      |   | 14 Homo sapiens ACA65           | 1.2272E-05 | 4.4846E-05 | 3.8961648  |
| CR2         | NM_00100665 CR2          |   | 1 Homo sapiens CD21; SLEB9;     | 0.00010246 | 0.00024461 | 3.88211365 |
| RELL2       | NM_173828.3 RELL2        |   | 5 Homo sapiens RELL2; FLJ905    | 5.9281E-06 | 2.5372E-05 | 3.87947481 |
| TUBGCP6     | NM_00100865 TUBGCP6      |   | 22 Homo sapiens GCP6            | 4.5365E-05 | 0.00012624 | 3.87690767 |
| LOC729952   | XR_015724.2 LOC729952    |   | 1 PREDICTED: Homo sapiens n     | 0.00705321 | 0.00851471 | 3.87151739 |
| NMT2        | NM_004808.2 NMT2         |   | 10 Homo sapiens N-myristoyltra  | 0.00026765 | 0.00053395 | 3.84346436 |
| TMOD1       | NM_003275.1 TMOD1        |   | 9 Homo sapiens ETMOD; D9S5      | 0.0007625  | 0.0012792  | 3.8426042  |
| RPPH1       | NR_002312.1 RPPH1        |   | 14 Homo sapiens H1RNA           | 0.00089003 | 0.00145557 | 3.84044831 |
| SERF1A      | NM_021967.1 SERF1A       |   | 5 Homo sapiens H4F5; 4F5; SM    | 0.00023748 | 0.00048435 | 3.83644968 |
| FHL1        | NM_001449.3 FHL1         | X | Homo sapiens XFO-T; SLIM1;      | 0.00015203 | 0.00033584 | 3.83344905 |
| ST3GAL2     | NM_006927.2 ST3GAL2      |   | 16 Homo sapiens SIAT4B; Gal-N   | 7.5701E-05 | 0.00019075 | 3.8256765  |
| SLC43A3     | NM_017611.2 SLC43A3      |   | 11 Homo sapiens FOAP-13; EEG    | 0.00580642 | 0.00722529 | 3.81595479 |
| GLDC        | NM_000170.1 GLDC         |   | 9 Homo sapiens MGC138198; (     | 9.2583E-09 | 3.077E-07  | 3.79994799 |
| LOC644761   | XR_019390.1 LOC644761    |   | PREDICTED: Homo sapiens n       | 4.4157E-06 | 2.0434E-05 | 3.79879143 |
| MTSS1       | NM_014751.2 MTSS1        |   | 8 Homo sapiens MIM; KIAA042     | 2.2041E-08 | 5.1569E-07 | 3.79232419 |
| CD164L2     | NM_207397.1 CD164L2      |   | 1 Homo sapiens UNQ6122          | 0.00016793 | 0.00036425 | 3.78939632 |
| LEFTY2      | NM_003240.2 LEFTY2       |   | 1 Homo sapiens LEFTA; TGFB4     | 0.03608357 | 0.03381365 | 3.78678033 |
| CLDN23      | NM_194284.2 CLDN23       |   | 8 Homo sapiens CLDNL; hCG1(     | 3.2972E-07 | 3.0678E-06 | 3.78141686 |
| APLP1       | NM_005166.3 APLP1        |   | 19 Homo sapiens APLP            | 0.00114011 | 0.00179787 | 3.7769081  |
| TTC13       | XM_939087.1 TTC13        |   | 1 Homo sapiens FLJ22584         | 4.9038E-06 | 2.2087E-05 | 3.7645647  |
| MICAL1      | NM_022765.2 MICAL1       |   | 6 Homo sapiens NICAL; DKFZp     | 4.4488E-07 | 3.7678E-06 | 3.75138687 |
| MGC11082    | XR_079560.1 MGC11082     |   | PREDICTED: Homo sapiens h       | 0.00329187 | 0.00442717 | 3.74077842 |
| C3orf59     | NM_178496.2 C3ORF59      |   | 3 Homo sapiens chromosome 3     | 0.00082211 | 0.00136381 | 3.73440012 |
| RGS12       | NM_198229.2 RGS12        |   | 4 Homo sapiens DKFZp761K18      | 7.4079E-05 | 0.00018736 | 3.73063507 |
| AIFM2       | NM_032797.4 AIFM2        |   | 10 Homo sapiens PRG3; RP11-3    | 0.00033588 | 0.00064613 | 3.72887943 |
| LOC441032   | XM_933495.1 LOC441032    |   | 4 PREDICTED: Homo sapiens s     | 0.00106699 | 0.00170028 | 3.71697292 |
| DNAJC27     | NM_016544.1 DNAJC27      |   | 2 Homo sapiens RabJS; DKFZp     | 9.5432E-05 | 0.00023098 | 3.71464933 |
| RUNDC3B     | NM_138290.1 RUNDC3B      |   | 7 Homo sapiens RPIP9; RPIB9;    | 2.0354E-07 | 2.1832E-06 | 3.7073062  |
| SLC38A9     | NM_173514.1 SLC38A9      |   | 5 Homo sapiens FLJ90709; MG     | 0.00023545 | 0.00048076 | 3.69868978 |
| SNORD12     | NR_003030.1 SNORD12      |   | 20 Homo sapiens HBII-99         | 0.00900733 | 0.01051074 | 3.6774442  |
| GPER        | NM_001505.1 GPER         |   | 7 Homo sapiens LyGPR; DRY12     | 0.0048359  | 0.00616898 | 3.67515719 |
| MIR488      | NR_030163.1 MIR488       |   | Homo sapiens microRNA 488       | 0.04282654 | 0.03899544 | 3.67389399 |
| POLA        | NM_016937.1 POLA         | X | Homo sapiens polymerase (C      | 0.02903067 | 0.02822016 | 3.67130432 |
| AMN1        | NM_207337.1 AMN1         |   | 12 Homo sapiens antagonist of i | 0.00030345 | 0.00059377 | 3.67016097 |
| PNPLA7      | NM_152286.2 PNPLA7       |   | 9 Homo sapiens FLJ44279; NTL    | 6.6876E-08 | 1.0367E-06 | 3.6642344  |
| CCS         | XM_938909.1 CCS          |   | PREDICTED: Homo sapiens c       | 3.5574E-08 | 6.9362E-07 | 3.65610555 |
|             | Hs.21177 Hs.21177        |   | 6 Homo sapiens mRNA full leng   | 0.00125964 | 0.00195751 | 3.64636051 |
| PTPRE       | NM_130435.2 PTPRE        |   | 10 Homo sapiens DKFZp313F13     | 9.9652E-05 | 0.00023928 | 3.64590888 |
| KIF13B      | NM_015254.2 KIF13B       |   | 8 Homo sapiens KIAA0639; GA     | 5.0771E-06 | 2.2612E-05 | 3.63721078 |
| ZXDB        | NM_007157.3 ZXDB         | X | Homo sapiens dJ83L6.1           | 2.8125E-05 | 8.5863E-05 | 3.62890629 |
| HIST2H2AA4  | NM_00104087 HIST2H2AA4   |   | 1 Homo sapiens H2A/R            | 3.1308E-09 | 1.5878E-07 | 3.61460849 |
| CTRL        | NM_001907.1 CTRL         |   | 16 Homo sapiens CTRL1; MGC7(    | 8.7636E-06 | 3.4189E-05 | 3.6010839  |
|             | Hs.522924 Hs.522924      |   | 10 Homo sapiens cDNA FLJ4316    | 2.1736E-05 | 7.0165E-05 | 3.59432373 |
| LOC728945   | XM_00172348 LOC728945    |   | 1 PREDICTED: Homo sapiens s     | 0.04874247 | 0.04344879 | 3.59377201 |
| LOC10013280 | XR_039272.1 LOC100132804 |   | PREDICTED: Homo sapiens n       | 0.00567003 | 0.0070837  | 3.59176036 |
| ATF6B       | NM_004381.4 ATF6B        |   | 6 Homo sapiens activating tran  | 0.00388696 | 0.00511921 | 3.57841073 |
| LOC729513   | XR_039881.1 LOC729513    |   | PREDICTED: Homo sapiens n       | 0.02153038 | 0.02197622 | 3.55045806 |



## 5.0 ACL-Indepen Upreg

|             |             |              |   |                                 |            |            |            |
|-------------|-------------|--------------|---|---------------------------------|------------|------------|------------|
|             | Hs.326560   | HS.326560    |   | PREDICTED: Homo sapiens L       | 1.2384E-07 | 1.5885E-06 | 3.54555608 |
| INPP5A      | XM_936595.1 | INPP5A       |   | PREDICTED: Homo sapiens ir      | 0.00397967 | 0.00522719 | 3.54307491 |
| SGSM1       | XM_943783.1 | SGSM1        |   | 22 Homo sapiens MGC133298; I    | 1.2554E-05 | 4.5591E-05 | 3.54051532 |
| LOC10013385 | XM_00171453 | LOC100133851 |   | PREDICTED: Homo sapiens s       | 0.00176121 | 0.00260018 | 3.51543277 |
| HLA-DRA     | NM_019111.3 | HLA-DRA      |   | 6 Homo sapiens HLA-DRA1         | 2.2318E-08 | 5.208E-07  | 3.51147158 |
| RN7SK       | NR_001445.1 | RN7SK        |   | 6 Homo sapiens 7SK              | 1.4157E-10 | 3.2688E-08 | 3.50932636 |
| GEM         | NM_005261.2 | GEM          |   | 8 Homo sapiens KIR; MGC2629     | 8.181E-06  | 3.2421E-05 | 3.5007352  |
| TRAPPC2P1   | NR_002166.1 | TRAPPC2P1    |   | 19 Homo sapiens SEDLP1; MIP-    | 0.00017489 | 0.00037656 | 3.48885219 |
| TFAP2C      | NM_003222.3 | TFAP2C       |   | 20 Homo sapiens AP2-GAMMA; "    | 2.622E-08  | 5.7513E-07 | 3.48761418 |
| ZFP30       | NM_014898.1 | ZFP30        |   | 19 Homo sapiens KIAA0961; ZN    | 0.02072092 | 0.02124887 | 3.48461313 |
| ITPKB       | NM_002221.2 | ITPKB        |   | 1 Homo sapiens IP3K-B; IP3KB    | 0.04631036 | 0.04164041 | 3.46913847 |
| MAN2A2      | NM_006122.2 | MAN2A2       |   | 15 Homo sapiens MANA2X          | 0.00145196 | 0.00220826 | 3.45938449 |
| TERF1       | NM_017489.1 | TERF1        |   | 8 Homo sapiens t-TRF1; TRBF1    | 0.00043522 | 0.00080224 | 3.45720231 |
| DAPK3       | NM_001348.1 | DAPK3        |   | 19 Homo sapiens FLJ36473; ZIF   | 3.0921E-06 | 1.5521E-05 | 3.45038181 |
| RNU4-2      | NR_003137.2 | RNU4-2       |   | Homo sapiens RNA, U4 small      | 1.0644E-08 | 3.3714E-07 | 3.44411731 |
| SNORD114-2  | NR_003194.1 | SNORD114-2   |   | 14 Homo sapiens 14q(II-2)       | 0.03302524 | 0.03133933 | 3.43929727 |
| PFDN4       | NM_002623.3 | PFDN4        |   | 20 Homo sapiens C1; PFD4        | 0.05181688 | 0.04564672 | 3.42875405 |
|             | Hs.537217   | HS.537217    |   | 14 Homo sapiens mRNA for IgE    | 0.01113453 | 0.0125668  | 3.42819691 |
|             | Hs.534680   | HS.534680    |   | PREDICTED: Homo sapiens h       | 3.4189E-08 | 6.7714E-07 | 3.42769467 |
| CD24        | NM_013230.2 | CD24         | Y | Homo sapiens CD24A              | 3.6665E-10 | 5.9574E-08 | 3.42115535 |
| MMP11       | NM_005940.3 | MMP11        |   | 22 Homo sapiens ST3; SL-3; ST   | 0.00125916 | 0.00195746 | 3.42005983 |
|             | Hs.197064   | HS.197064    |   | 2 602285360F1 NIH_MGC_86 l      | 0.02926632 | 0.02840831 | 3.41277841 |
| LOC645566   | XM_928583.1 | LOC645566    |   | 7 PREDICTED: Homo sapiens h     | 0.04443823 | 0.04025408 | 3.38919245 |
| GALNT2      | NM_004481.2 | GALNT2       |   | 1 Homo sapiens GalNAc-T2        | 0.00135742 | 0.00208581 | 3.38540949 |
| LOC650796   | XM_939881.1 | LOC650796    |   | PREDICTED: Homo sapiens h       | 0.00239387 | 0.00337682 | 3.3827231  |
| AGTPBP1     | NM_015239.1 | AGTPBP1      |   | 9 Homo sapiens NNA1; KIAA1C     | 2.548E-05  | 7.9389E-05 | 3.37466957 |
| ELOVL3      | NM_152310.1 | ELOVL3       |   | 10 Homo sapiens CIG30; CIG-30   | 2.7112E-08 | 5.8304E-07 | 3.37376373 |
| CYP2R1      | NM_024514.4 | CYP2R1       |   | 11 Homo sapiens MGC4663         | 6.3738E-09 | 2.3797E-07 | 3.37374162 |
| ATRN        | NM_139322.1 | ATRN         |   | 20 Homo sapiens DPPT-L; MGC1    | 4.6265E-05 | 0.00012817 | 3.37331561 |
| C9orf169    | NM_199001.1 | C9ORF169     |   | Homo sapiens chromosome 9       | 1.7339E-08 | 4.4614E-07 | 3.36951742 |
| DAAM1       | NM_014992.1 | DAAM1        |   | 14 Homo sapiens FLJ41657; KIA   | 1.7925E-07 | 2.0112E-06 | 3.36032182 |
| TMEM117     | NM_032256.1 | TMEM117      |   | 12 Homo sapiens DKFZp434K24     | 0.0194637  | 0.02013376 | 3.36015846 |
| PLEKHM1     | NM_014798.1 | PLEKHM1      |   | PREDICTED: Homo sapiens p       | 3.4768E-07 | 3.1678E-06 | 3.35543764 |
| MMP23B      | NM_006983.1 | MMP23B       |   | 1 Homo sapiens MIFR-1; MIFR;    | 0.02260177 | 0.02291253 | 3.35297669 |
| LOC653108   | XM_930914.1 | LOC653108    |   | 21 PREDICTED: Homo sapiens s    | 1.7544E-06 | 1.0235E-05 | 3.34712075 |
| OGDHL       | NM_018245.1 | OGDHL        |   | 10 Homo sapiens oxoglutarate d  | 6.5743E-08 | 1.0319E-06 | 3.3432712  |
| MMP15       | NM_002428.2 | MMP15        |   | 16 Homo sapiens MTMMP2; MT2     | 1.2832E-05 | 4.6372E-05 | 3.33681528 |
| LOC653080   | XM_930884.1 | LOC653080    |   | 8 PREDICTED: Homo sapiens s     | 0.01261548 | 0.01394586 | 3.3325473  |
| MEGF6       | NM_001409.3 | MEGF6        |   | 1 Homo sapiens KIAA0815; EG     | 2.424E-06  | 1.296E-05  | 3.33031866 |
| C11orf24    | NM_022338.2 | C11ORF24     |   | 11 Homo sapiens DM4E3           | 6.0383E-06 | 2.5781E-05 | 3.32113119 |
| LRRC3       | NM_030891.3 | LRRC3        |   | 21 Homo sapiens C21orf102       | 6.7918E-06 | 2.8242E-05 | 3.30665405 |
| CHCHD7      | NM_00101167 | CHCHD7       |   | 8 Homo sapiens FLJ40966; MG     | 1.7564E-09 | 1.1947E-07 | 3.30546691 |
| LOC650708   | XM_939796.1 | LOC650708    |   | PREDICTED: Homo sapiens s       | 0.01722849 | 0.01817515 | 3.29365757 |
| SH3BGR1     | NM_031469.1 | SH3BGR1      |   | 6 Homo sapiens FLJ90025         | 1.3003E-08 | 3.7284E-07 | 3.26751377 |
| GRB10       | NM_005311.3 | GRB10        |   | 7 Homo sapiens RSS; GRB-IR;     | 1.7584E-05 | 5.9659E-05 | 3.26530827 |
| LOC339352   | XR_019601.2 | LOC339352    |   | PREDICTED: Homo sapiens n       | 4.9185E-06 | 2.2119E-05 | 3.2560171  |
| GCH1        | NM_000161.2 | GCH1         |   | 14 Homo sapiens DYT5; GTP-CH    | 0.00580283 | 0.00722184 | 3.25326873 |
| SHROOM2     | NM_001649.2 | SHROOM2      | X | Homo sapiens APXL; DKFZp7       | 0.01244098 | 0.01377899 | 3.25115202 |
| FOXD4L1     | NM_012184.3 | FOXD4L1      |   | 2 Homo sapiens BA395L14.1       | 4.6616E-06 | 2.1292E-05 | 3.24954821 |
| ZBTB42      | NM_00113760 | ZBTB42       |   | 14 Homo sapiens zinc finger anc | 8.2697E-08 | 1.1895E-06 | 3.24427705 |
| NEU1        | NM_000434.2 | NEU1         |   | 6 Homo sapiens NEU; SIAL1       | 5.3592E-11 | 1.9592E-08 | 3.2361186  |
| MUC1        | NM_00104439 | MUC1         |   | 1 Homo sapiens PEMT; PUM; PI    | 2.3151E-05 | 7.3864E-05 | 3.21639394 |
| CHURC1      | NM_145165.2 | CHURC1       |   | 14 Homo sapiens FLJ33064; chc   | 1.3157E-08 | 3.7601E-07 | 3.20354454 |
| KLK10       | NM_145888.1 | KLK10        |   | 19 Homo sapiens NES1; PRSSL1    | 0.01692476 | 0.01789994 | 3.20054188 |
| MAN1A1      | NM_005907.2 | MAN1A1       |   | 6 Homo sapiens MAN9; HUMM:      | 1.1897E-06 | 7.6413E-06 | 3.19358721 |
| HNF1B       | NM_000458.2 | HNF1B        |   | 17 Homo sapiens VHNF1; MODY     | 0.00203069 | 0.00293289 | 3.19311482 |
| RNF175      | NM_173662.1 | RNF175       |   | 4 Homo sapiens FLJ34190         | 0.00407585 | 0.00533595 | 3.19002217 |
| C3orf46     | XM_933917.1 | C3ORF46      |   | 3 PREDICTED: Homo sapiens c     | 0.0077189  | 0.00919186 | 3.18401009 |
| HPSE        | NM_006665.2 | HPSE         |   | 4 Homo sapiens HPA; HSE1; H     | 1.2218E-05 | 4.4685E-05 | 3.18026456 |
| ZMAT5       | NM_019103.2 | ZMAT5        |   | 22 Homo sapiens zinc finger, ma | 2.7378E-06 | 1.4206E-05 | 3.17485288 |
| TMCO4       | NM_181719.2 | TMCO4        |   | 1 Homo sapiens RP5-1056L3.6     | 0.00506354 | 0.00641923 | 3.16844672 |
| LCMT2       | NM_014793.3 | LCMT2        |   | 15 Homo sapiens TYW4; PPM2;     | 0.00020502 | 0.0004284  | 3.16242388 |
| AP2A1       | NM_014203.2 | AP2A1        |   | 19 Homo sapiens CLAPA1; AP2-    | 3.3104E-07 | 3.0736E-06 | 3.16079451 |
| C21orf2     | NM_004928.1 | C21ORF2      |   | 21 Homo sapiens A2; YF5         | 1.8035E-05 | 6.0814E-05 | 3.15713426 |
| TMC5        | NM_024780.3 | TMC5         |   | 16 Homo sapiens FLJ13593        | 0.01022936 | 0.01169412 | 3.14851077 |
| LOC728965   | XM_00112893 | LOC728965    |   | 17 PREDICTED: Homo sapiens s    | 0.0310598  | 0.02982258 | 3.14675717 |
|             | Hs.578161   | HS.578161    |   | 14 SM014446 Placenta 3 EST Hc   | 0.03968784 | 0.03660092 | 3.14487989 |
| CYB5R1      | NM_016243.2 | CYB5R1       |   | 1 Homo sapiens B5R.1; NQO3/     | 1.9329E-08 | 4.8043E-07 | 3.14230852 |
| C3orf17     | NM_00102507 | C3ORF17      |   | 3 Homo sapiens DKFZP434F20      | 0.0006253  | 0.00108363 | 3.14151972 |
| TAOK1       | NM_020791.1 | TAOK1        |   | 17 Homo sapiens TAO1; MAP3K:    | 0.02253401 | 0.02284912 | 3.13011515 |

## 5.0 ACL-Indepen Upreg

|             |             |              |   |              |                |                           |                 |            |
|-------------|-------------|--------------|---|--------------|----------------|---------------------------|-----------------|------------|
| XIAP        | NM_001167.2 | XIAP         | X | Homo sapiens | XLP2; ILP1; AI | 0.00035398                | 0.00067503      | 3.12667296 |
| ENTP5       | NM_001249.1 | ENTP5        |   | 14           | Homo sapiens   | NTPDase-5; M              | 0.05637185      | 0.04905838 |
| SMARCD3     | NM_003078.3 | SMARCD3      |   | 7            | Homo sapiens   | Rsc6p; BAF60              | 0.00012329      | 0.00028349 |
| ANKRD22     | NM_144590.1 | ANKRD22      |   | 10           | Homo sapiens   | MGC22805                  | 0.04942769      | 0.04392127 |
| FRZB        | NM_001463.2 | FRZB         |   | 2            | Homo sapiens   | FRZB-1; FRZB              | 0.00414169      | 0.00541084 |
| TOX4        | NM_014828.1 | TOX4         |   | 14           | Homo sapiens   | KIAA0737; LC              | 2.8207E-05      | 8.6054E-05 |
| MYOM2       | NM_003970.1 | MYOM2        |   | 8            | Homo sapiens   | TTNAP                     | 2.4371E-05      | 7.6696E-05 |
| C5AR1       | NM_001736.2 | C5AR1        |   | 19           | Homo sapiens   | CD88; C5AR; I             | 0.0341101       | 0.03220857 |
| PNPLA8      | NM_015723.2 | PNPLA8       |   | 7            | Homo sapiens   | IPLA2G; IPLA2             | 1.8004E-06      | 1.0413E-05 |
| LOC10013074 | XR_037442.1 | LOC100130746 |   |              |                | PREDICTED: Homo sapiens n | 0.00478285      | 0.00611018 |
| MAGEE1      | NM_020932.1 | MAGEE1       | X |              |                | Homo sapiens              | KIAA1587; HC    | 4.5828E-06 |
| SGK         | NM_005627.2 | SGK          |   | 6            | Homo sapiens   | SGK1                      | 1.585E-09       | 2.0975E-05 |
| ZNF177      | NM_003451.1 | ZNF177       |   | 19           | Homo sapiens   | PIGX                      | 0.00497126      | 0.00631685 |
| SGK1        | NM_005627.3 | SGK1         |   | 6            | Homo sapiens   | SGK                       | 6.0509E-09      | 2.2884E-07 |
| C9orf50     | NM_199350.1 | C9ORF50      |   | 9            | Homo sapiens   | FLJ35803                  | 0.00975953      | 0.01124492 |
| LOC729858   | XR_037908.1 | LOC729858    |   |              |                | PREDICTED: Homo sapiens n | 0.00022931      | 0.00046976 |
| CAPN5       | NM_004055.3 | CAPN5        |   | 11           | Homo sapiens   | HTRA3; FLJ46              | 8.8013E-08      | 1.2556E-06 |
| FIGNL1      | NM_00104276 | FIGNL1       |   | 7            | Homo sapiens   | fidgetin-like 1           | 9.296E-08       | 1.3092E-06 |
| LOC650737   | XM_944786.1 | LOC650737    |   |              |                | PREDICTED: Homo sapiens h | 5.7035E-07      | 4.4841E-06 |
| PLD1        | NM_002662.2 | PLD1         |   | 3            | Homo sapiens   | phospholipase             | 0.00026604      | 0.00053159 |
| LOC10012897 | XR_037834.1 | LOC100128974 |   |              |                | PREDICTED: Homo sapiens n | 9.9725E-05      | 0.00023933 |
| MICALL1     | NM_033386.2 | MICALL1      |   | 22           | Homo sapiens   | KIAA1668; MI              | 0.00644072      | 0.00789368 |
| HIST2H2AC   | NM_003517.2 | HIST2H2AC    |   | 1            | Homo sapiens   | H2AFQ; MGC7               | 1.1847E-08      | 3.5237E-07 |
| ADAT2       | NM_182503.2 | ADAT2        |   | 6            | Homo sapiens   | TAD2; dJ20N2              | 0.00031391      | 0.00061016 |
| C14orf79    | NM_174891.2 | C14ORF79     |   | 14           | Homo sapiens   | chromosome 1              | 1.8944E-07      | 2.0777E-06 |
| EXPH5       | NM_015065.1 | EXPH5        |   | 11           | Homo sapiens   | SLAC2-B; KIA              | 9.9569E-05      | 0.00023915 |
| GSTT2       | NM_00108084 | GSTT2        |   |              |                | Homo sapiens              | glutathione S-  |            |
| ITGB7       | NM_000889.1 | ITGB7        |   | 12           | Homo sapiens   | integrin, beta            | 0.0549272       | 0.04799156 |
| LOC731007   | XM_938196.1 | LOC731007    |   |              |                | PREDICTED: Homo sapiens s | 8.5774E-05      | 0.00021217 |
| PTPN18      | NM_014369.2 | PTPN18       |   | 2            | Homo sapiens   | BDP1                      | 0.02054217      | 0.02108282 |
| LOC642648   | XM_926474.1 | LOC642648    |   |              |                | PREDICTED: Homo sapiens h | 0.0309371       | 0.02972103 |
| LOC648526   | XM_937579.1 | LOC648526    |   |              |                | PREDICTED: Homo sapiens s | 1.4058E-09      | 1.1013E-07 |
| ZNF91       | NM_003430.1 | ZNF91        |   | 19           | Homo sapiens   | HTF10; HPF7               | 3.583E-06       | 1.7436E-05 |
| DDX60       | NM_017631.3 | DDX60        |   | 4            | Homo sapiens   | FLJ20035; FLJ             | 0.04155511      | 0.03801132 |
| RAB24       | NM_00103167 | RAB24        |   | 5            | Homo sapiens   | RAB24, memb               | 6.2936E-10      | 7.3627E-08 |
| ZFP92       | NM_00113627 | ZFP92        | X |              |                | Homo sapiens              | zinc finger pro |            |
| GABRG2      | NM_198904.1 | GABRG2       |   | 5            | Homo sapiens   | ECA2; GEFSP               | 0.00029502      | 0.00057974 |
| ABHD8       | NM_024527.3 | ABHD8        |   | 19           | Homo sapiens   | FLJ11743; MG              | 6.9709E-07      | 5.1614E-06 |
| LOC732371   | XM_941758.1 | LOC732371    |   |              |                | PREDICTED: Homo sapiens s | 8.0771E-05      | 0.00020139 |
| RRAGC       | NM_022157.2 | RRAGC        |   | 1            | Homo sapiens   | FLJ13311; GTI             | 5.6636E-05      | 0.00015086 |
| LOC653127   | XM_931760.1 | LOC653127    |   |              |                | PREDICTED: Homo sapiens s | 0.00864693      | 0.01014823 |
| SCARNA11    | NR_003012.1 | SCARNA11     |   | 12           | Homo sapiens   | ACA57                     | 3.3048E-09      | 1.6382E-07 |
| LOC730525   | NM_199327.1 | LOC730525    |   |              |                | PREDICTED: Homo sapiens h | 0.01125728      | 0.01268089 |
| FLJ21865    | NM_022759.1 | FLJ21865     |   | 17           | Homo sapiens   | DKFZp434P17               | 3.6717E-06      | 1.7701E-05 |
| OPTN        | NM_00100821 | OPTN         |   | 10           | Homo sapiens   | PIP2; HYPL; N             | 8.269E-08       | 1.1913E-06 |
| RNFT1       | NM_016125.2 | RNFT1        |   | 17           | Homo sapiens   | PTD016; MGC               | 1.2583E-06      | 7.9367E-06 |
| LOC388588   | XM_946205.1 | LOC388588    |   |              |                | PREDICTED: Homo sapiens h | 2.6059E-07      | 2.5777E-06 |
| LYPD6       | NM_194317.2 | LYPD6        |   | 2            | Homo sapiens   | MGC52057                  | 0.00025737      | 0.0005178  |
| LFNG        | NM_00104016 | LFNG         |   | 7            | Homo sapiens   | SCDO3                     | 1.6303E-06      | 9.6844E-06 |
| KLRA1       | NM_006611.1 | KLRA1        |   | 12           | Homo sapiens   | LY49L; Ly-49L             | 0.0005984       | 0.00104505 |
| B3GAT3      | NM_012200.2 | B3GAT3       |   | 11           | Homo sapiens   | GLCATI; GlcAT             | 0.03576007      | 0.03356427 |
| KLHL35      | NM_173583.1 | KLHL35       |   | 11           | Homo sapiens   | kelch-like 35 (           | 0.0156207       | 0.0166816  |
| CSAD        | NM_015989.3 | CSAD         |   | 12           | Homo sapiens   | PCAP; MGC11'              | 2.2922E-07      | 2.3661E-06 |
| DNAJC30     | NM_032317.2 | DNAJC30      |   | 7            | Homo sapiens   | MGC12943                  | 0.00430043      | 0.00557094 |
| C5orf5      | NM_016603.1 | C5ORF5       |   | 5            | Homo sapiens   | KHCHP; MGC5               | 8.2189E-07      | 5.8109E-06 |
| ANO10       | NM_018075.2 | ANO10        |   | 3            | Homo sapiens   | FLJ10375; MG              | 0.01244522      | 0.01378195 |
| SLC36A4     | NM_152313.2 | SLC36A4      |   | 11           | Homo sapiens   | FLJ38932; PAI             | 0.04324786      | 0.03931786 |
| DKFZp686I15 | NM_207495.2 | DKFZP686I15  |   | 6            | Homo sapiens   | hypothetical p            | 0.00626213      | 0.00772009 |
| C1orf124    | NM_032018.4 | C1ORF124     |   | 1            | Homo sapiens   | DKFZP547N04               | 0.00573033      | 0.00714581 |
| LOC10013342 | XM_00171382 | LOC100133420 |   |              |                | PREDICTED: Homo sapiens h | 0.00562869      | 0.00703706 |
| PROK2       | NM_021935.2 | PROK2        |   | 3            | Homo sapiens   | PK2; BV8; MI              | 0.00656041      | 0.00802021 |
| LOC645001   | XR_039155.1 | LOC645001    |   |              |                | PREDICTED: Homo sapiens n | 0.00993539      | 0.0114808  |
| JUN         | NM_002228.3 | JUN          |   | 1            | Homo sapiens   | AP1; c-Jun                | 7.4105E-11      | 2.1673E-08 |
| TM2D2       | NM_078473.2 | TM2D2        |   | 8            | Homo sapiens   | MGC125814; I              | 5.7654E-07      | 4.5166E-06 |
| MT1G        | NM_005950.1 | MT1G         |   | 16           | Homo sapiens   | MT1; MT1K; M              | 5.7483E-11      | 1.9398E-08 |
| EPM2AIP1    | NM_014805.2 | EPM2AIP1     |   | 3            | Homo sapiens   | FLJ11207; KIA             | 6.4346E-06      | 2.7065E-05 |
| ISL1        | NM_002202.1 | ISL1         |   | 5            | Homo sapiens   | Isl-1                     | 1.1046E-06      | 7.2165E-06 |
| C4orf23     | NM_152544.1 | C4ORF23      |   | 4            | Homo sapiens   | FLJ12891; FLJ             | 0.02662345      | 0.02630861 |
| TMEM25      | NM_032780.2 | TMEM25       |   | 11           | Homo sapiens   | FLJ14399                  | 0.00119554      | 0.00187316 |
| SUSD3       | NM_145006.2 | SUSD3        |   | 9            | Homo sapiens   | MGC26847                  | 0.00010801      | 0.00025495 |

## 5.0 ACL-Indepen Upreg

|             |             |             |    |                              |            |             |            |
|-------------|-------------|-------------|----|------------------------------|------------|-------------|------------|
| LOC644128   | XM_927344.1 | LOC644128   | 8  | PREDICTED: Homo sapiens h    | 1.1879E-05 | 4.3665E-05  | 2.84371476 |
| KBTBD7      | NM_032138.3 | KBTBD7      | 13 | Homo sapiens DKFZP434E23     | 0.0001167  | 0.00027081  | 2.84234325 |
| RANBP6      | NM_012416.2 | RANBP6      | 9  | Homo sapiens RAN binding p   | 1.0227E-05 | 3.8762E-05  | 2.84127655 |
| FAM118B     | NM_024556.1 | FAM118B     | 11 | Homo sapiens FLJ21103        | 0.00038557 | 0.00072551  | 2.84096895 |
| GADD45B     | NM_015675.1 | GADD45B     | 19 | Homo sapiens MYD118; DKF     | 8.8682E-07 | 6.1219E-06  | 2.83944704 |
| VGf         | NM_003378.2 | VGf         | 7  | Homo sapiens VGf nerve gro   | 1.1475E-11 | 7.745E-09   | 2.83860597 |
| PTH2        | NM_178449.2 | PTH2        | 19 | Homo sapiens parathyroid hc  | 0.00010686 | 0.00025291  | 2.83677774 |
| MPP7        | NM_173496.2 | MPP7        | 10 | Homo sapiens FLJ32798; RP:   | 0.00023114 | 0.00047317  | 2.83468538 |
| SERPINF2    | NM_000934.1 | SERPINF2    | 17 | Homo sapiens API; A2AP; AA   | 0.01384086 | 0.0150707   | 2.83325735 |
| NHEDC2      | XM_933390.1 | NHEDC2      | 4  | Homo sapiens FLJ23984; NH    | 0.00016585 | 0.00036081  | 2.83302975 |
| METTL9      | NM_00107718 | METTL9      | 16 | Homo sapiens PAP1; FLJ2191   | 0.00951461 | 0.01101044  | 2.83266464 |
| SNORD3A     | NR_006880.1 | SNORD3A     | 17 | Homo sapiens U3              | 1.059E-10  | 0.00049E-08 | 2.83168898 |
| SECISBP2L   | NM_014701.2 | SECISBP2L   | 15 | Homo sapiens SECIS binding   | 7.3979E-06 | 2.9912E-05  | 2.82891172 |
| MIER2       | NM_017550.1 | MIER2       | 19 | Homo sapiens KIAA1193        | 0.00241574 | 0.00340166  | 2.82603406 |
| ACAD10      | NM_025247.3 | ACAD10      | 12 | Homo sapiens MGC5601         | 1.8392E-06 | 1.0568E-05  | 2.82559206 |
| LOC648366   | XM_497707.2 | LOC648366   |    | PREDICTED: Homo sapiens s    | 0.05417851 | 0.04744608  | 2.8211854  |
| C5orf54     | NM_022090.3 | C5ORF54     | 5  | Homo sapiens chromosome 5    | 0.03362017 | 0.03182129  | 2.81794691 |
| LOC729760   | XR_016027.1 | LOC729760   | 2  | PREDICTED: Homo sapiens n    | 0.00064604 | 0.00111167  | 2.81492272 |
| CLN5        | NM_006493.1 | CLN5        | 13 | Homo sapiens FLJ90628; NC    | 9.0202E-05 | 0.00022058  | 2.81451283 |
| C21orf119   | NM_032910.2 | C21ORF119   | 21 | Homo sapiens PRED84; MGC     | 0.00010781 | 0.00025463  | 2.81423038 |
| ANGPTL4     | NM_00103966 | ANGPTL4     | 19 | Homo sapiens HFARP; ANGPT    | 2.1524E-07 | 2.2781E-06  | 2.81274351 |
| PCBD2       | NM_032151.3 | PCBD2       | 5  | Homo sapiens DCOH2; DCOH     | 0.00659726 | 0.0080518   | 2.81046554 |
| BMPR2       | NM_001204.5 | BMPR2       | 2  | Homo sapiens BRK-3; BMPR3    | 0.00012334 | 0.00028352  | 2.80650339 |
| CYR61       | NM_001554.3 | CYR61       | 1  | Homo sapiens CCN1; IGFBP1    | 3.1602E-10 | 5.5455E-08  | 2.8045981  |
| GBA         | NM_00100574 | GBA         | 1  | Homo sapiens GCB; GBA1; G    | 1.3485E-09 | 1.0955E-07  | 2.78626442 |
| CASC5       | NM_144508.2 | CASC5       | 15 | Homo sapiens D40; AF15Q14    | 0.00024533 | 0.00049769  | 2.78516367 |
| TBC1D16     | NM_019020.2 | TBC1D16     | 17 | Homo sapiens FLJ20748; MG    | 3.2027E-07 | 3.0022E-06  | 2.77832984 |
| WASF2       | NM_006990.2 | WASF2       | 1  | Homo sapiens SCAR2; WAVE     | 0.00335741 | 0.00450565  | 2.77612756 |
| MMP7        | NM_002423.3 | MMP7        | 11 | Homo sapiens MMP-7; PUMP-    | 0.00020858 | 0.00043481  | 2.77426909 |
| LOC10012995 | XM_00171910 | LOC10012995 | 6  | PREDICTED: Homo sapiens s    | 0.00041045 | 0.0007651   | 2.76835742 |
| BTC         | NM_001729.1 | BTC         | 4  | Homo sapiens betacellulin (B | 0.01584648 | 0.01690008  | 2.7655493  |
|             | Hs.403972   | Hs.403972   | 1  | Homo sapiens cDNA clone IM   | 0.00083372 | 0.00137889  | 2.76420056 |
| C10orf84    | NM_022063.1 | C10ORF84    | 10 | Homo sapiens RP11-319I23.    | 0.01212191 | 0.01349032  | 2.75506593 |
| LOC152195   | NM_194289.1 | LOC152195   | 3  | Homo sapiens hypothetical p  | 0.00031023 | 0.00060422  | 2.7477705  |
| LENG1       | NM_024316.1 | LENG1       | 19 | Homo sapiens leukocyte rece  | 0.03797839 | 0.03529151  | 2.73756024 |
| C1orf53     | NM_00102459 | C1ORF53     | 1  | Homo sapiens chromosome 1    | 1.5511E-08 | 4.2135E-07  | 2.73301019 |
| GRAMD3      | NM_023927.1 | GRAMD3      | 5  | Homo sapiens NS3P2; FLJ2.    | 4.5138E-05 | 0.00012573  | 2.73013043 |
| LIPG        | NM_006033.2 | LIPG        | 18 | Homo sapiens EL; PRO719; E   | 0.00248509 | 0.00347977  | 2.72631038 |
| FAM109A     | NM_144671.2 | FAM109A     | 12 | Homo sapiens FLJ32356        | 0.01274315 | 0.01406218  | 2.72407124 |
|             | Hs.550193   | Hs.550193   | 5  | Human unidentified mRNA, p   | 0.001409   | 0.00215301  | 2.72389461 |
| LOC729404   | XR_015968.1 | LOC729404   | 17 | PREDICTED: Homo sapiens n    | 0.02540487 | 0.02529245  | 2.72341191 |
| FOXD4       | NM_207305.2 | FOXD4       | 9  | Homo sapiens FOXD4A; MGC     | 4.0008E-07 | 3.4859E-06  | 2.71425527 |
| PAFAH2      | NM_000437.2 | PAFAH2      | 1  | Homo sapiens HSD-PLA2; FL    | 8.5808E-05 | 0.0002122   | 2.70285293 |
| LOC652900   | XM_00172491 | LOC652900   |    | PREDICTED: Homo sapiens s    | 0.00015087 | 0.0003336   | 2.69819577 |
|             | Hs.576106   | Hs.576106   | 10 | Homo sapiens cDNA FLJ4005    | 0.00025676 | 0.00051717  | 2.69394264 |
| VASH1       | NM_014909.2 | VASH1       | 14 | Homo sapiens KIAA1036        | 1.252E-07  | 1.5967E-06  | 2.69302334 |
| RND3        | NM_005168.3 | RND3        | 2  | Homo sapiens RhoE; Rho8; r   | 7.7689E-09 | 2.7157E-07  | 2.68967397 |
| WIZ         | NM_021241.2 | WIZ         | 19 | Homo sapiens ZNF803          | 0.00138844 | 0.00212567  | 2.68875762 |
|             | Hs.254752   | Hs.254752   | 3  | xv32c11.x1 Soares_NFL_T_C    | 0.02563791 | 0.0254782   | 2.68652933 |
| C10orf26    | NM_017787.3 | C10ORF26    | 10 | Homo sapiens MGC125648; I    | 6.8274E-06 | 2.8323E-05  | 2.6858698  |
| SNORD51     | NR_002589.1 | SNORD51     | 2  | Homo sapiens U51; RNU51      | 0.00019495 | 0.00041186  | 2.68465837 |
|             | Hs.379955   | Hs.379955   | 21 | AGENCOURT_7906333 NIH_I      | 0.05577801 | 0.04861392  | 2.67514563 |
| RPL23AP53   | NR_003572.2 | RPL23AP53   | 8  | Homo sapiens ribosomal prot  | 4.5431E-06 | 2.0837E-05  | 2.67135843 |
| TMEM80      | XM_938671.1 | TMEM80      |    | PREDICTED: Homo sapiens ti   | 0.01041633 | 0.01188155  | 2.66420649 |
| LOC642299   | XM_930677.1 | LOC642299   | 1  | PREDICTED: Homo sapiens h    | 0.00647631 | 0.00792844  | 2.66039869 |
| EXT1        | NM_000127.2 | EXT1        | 8  | Homo sapiens ttv; EXT        | 8.3956E-09 | 2.8551E-07  | 2.66009863 |
| CCRK        | NM_012119.3 | CCRK        | 9  | Homo sapiens p42; CDCH       | 1.2489E-05 | 4.5431E-05  | 2.65877731 |
| LPXN        | NM_004811.1 | LPXN        | 11 | Homo sapiens LDPL            | 7.3931E-05 | 0.00018715  | 2.65698564 |
| HCP5        | NM_006674.2 | HCP5        | 6  | Homo sapiens P5-1; D6S265    | 4.7772E-09 | 1.9405E-07  | 2.6507341  |
| RAB11B      | NM_004218.1 | RAB11B      | 19 | Homo sapiens H-YPT3; MGC1    | 0.04166738 | 0.03810606  | 2.65051219 |
| TNFSF9      | NM_003811.2 | TNFSF9      | 19 | Homo sapiens 4-1BB-L         | 5.6526E-06 | 2.448E-05   | 2.64386404 |
| HEATR7A     | NM_00109928 | HEATR7A     | 8  | Homo sapiens DKFZp434I01.    | 0.00108542 | 0.00172526  | 2.64160029 |
| FAM173B     | NM_199133.1 | FAM173B     | 5  | Homo sapiens FLJ20667        | 7.2156E-06 | 2.9419E-05  | 2.64041549 |
| VPS18       | NM_020857.2 | VPS18       | 15 | Homo sapiens KIAA1475; PE    | 1.9052E-06 | 1.0883E-05  | 2.63974545 |
| ZNF77       | NM_021217.1 | ZNF77       | 19 | Homo sapiens pT1             | 0.00041597 | 0.00077341  | 2.63744234 |
| TMEM8       | NM_021259.1 | TMEM8       | 16 | Homo sapiens M83; TMEM6      | 2.6011E-06 | 1.3707E-05  | 2.63519899 |
| MAMDC2      | NM_153267.3 | MAMDC2      | 9  | Homo sapiens MGC21981        | 0.01910521 | 0.01981666  | 2.63461693 |
| PXK         | NM_017771.2 | PXK         | 3  | Homo sapiens MONaKa; FLJ2    | 0.02244229 | 0.02276137  | 2.63295689 |
| AKAP13      | NM_007200.3 | AKAP13      | 15 | Homo sapiens HA-3; FLJ1191   | 1.4626E-06 | 8.8746E-06  | 2.62407609 |
| MBTPS2      | NM_015884.1 | MBTPS2      |    | Homo sapiens S2P             | 0.0515487  | 0.04545611  | 2.62059301 |

## 5.0 ACL-Indepen Upreg

|             |             |              |    |                               |            |            |            |
|-------------|-------------|--------------|----|-------------------------------|------------|------------|------------|
| GDE1        | NM_016641.3 | GDE1         | 16 | Homo sapiens GDE1; 363E6.     | 1.2347E-07 | 1.5862E-06 | 2.61886213 |
| PTPN20      | XM_937744.1 | PTPN20       |    | PREDICTED: Homo sapiens p     | 0.01990933 | 0.02052938 | 2.61588861 |
| ARFGEF2     | NM_006420.1 | ARFGEF2      | 20 | Homo sapiens FLJ23723; dJ1    | 0.02064723 | 0.02117826 | 2.61327954 |
| NARG2       | NM_024611.4 | NARG2        | 15 | Homo sapiens BRCC1            | 0.00916289 | 0.01066815 | 2.61143974 |
| LOC652690   | XM_942299.1 | LOC652690    |    | PREDICTED: Homo sapiens s     | 0.01150465 | 0.01291477 | 2.60948803 |
| LOC10012907 | XM_00172099 | LOC100129076 |    | PREDICTED: Homo sapiens s     | 0.00276932 | 0.00381086 | 2.60875578 |
| NOC4L       | XM_942717.1 | NOC4L        |    | PREDICTED: Homo sapiens n     | 0.00062401 | 0.00108182 | 2.60469021 |
| FLJ32810    | XM_926804.1 | FLJ32810     |    | PREDICTED: Homo sapiens h     | 0.03151115 | 0.03019646 | 2.60126386 |
| ZFYVE1      | NM_021260.1 | ZFYVE1       | 14 | Homo sapiens KIAA1589; TA     | 0.01107276 | 0.01251158 | 2.59923061 |
| SCNN1D      | NM_002978.2 | SCNN1D       | 1  | Homo sapiens SCNED; ENAC      | 1.7261E-05 | 5.8816E-05 | 2.59908492 |
| SLC45A4     | NM_00108043 | SLC45A4      | 8  | Homo sapiens KIAA1126         | 0.0011073  | 0.00175432 | 2.59849148 |
| C14orf133   | NM_022067.2 | C14ORF133    | 14 | Homo sapiens FLJ12707         | 0.0002213  | 0.0004559  | 2.59782621 |
| TMEM2       | NM_013390.1 | TMEM2        | 9  | Homo sapiens transmembrar     | 3.5971E-06 | 1.7456E-05 | 2.59695028 |
|             | Hs.567472   | HS.567472    |    | 7 BX400436 Homo sapiens T C   | 0.02758169 | 0.02706955 | 2.59661969 |
| LOC727768   | XR_042487.1 | LOC727768    |    | PREDICTED: Homo sapiens n     | 3.4151E-07 | 3.131E-06  | 2.59559791 |
| IFT20       | NM_174887.2 | IFT20        | 17 | Homo sapiens intraflagellar t | 5.8147E-06 | 2.4948E-05 | 2.59526542 |
| LOC441019   | XM_498969.2 | LOC441019    | 4  | PREDICTED: Homo sapiens h     | 3.8511E-08 | 7.2509E-07 | 2.59480267 |
| TMEM145     | NM_173633.1 | TMEM145      | 19 | Homo sapiens FLJ90805         | 2.6939E-07 | 2.6498E-06 | 2.59176945 |
| MANEAL      | NM_00103174 | MANEAL       | 1  | Homo sapiens RP11-109P14.     | 0.00076701 | 0.00128505 | 2.58885127 |
| POLR2J      | NM_006234.4 | POLR2J       | 7  | Homo sapiens RPB11; MGC7      | 9.1686E-06 | 3.5485E-05 | 2.58660646 |
| C7orf52     | NM_198571.1 | C7ORF52      | 7  | Homo sapiens FLJ39237; DK     | 0.00317341 | 0.00429088 | 2.5815089  |
| GSTTP2      | NR_003082.1 | GSTTP2       | 22 | Homo sapiens FLJ46109         | 0.03196581 | 0.03055207 | 2.56548585 |
| SAP18       | NM_005870.3 | SAP18        | 13 | Homo sapiens SAP18p; MGC      | 6.2531E-07 | 4.7791E-06 | 2.56257159 |
| GALNT5      | NM_014568.1 | GALNT5       | 2  | Homo sapiens MGC165041; (     | 0.02770341 | 0.0271647  | 2.56127019 |
| TMEM175     | NM_032326.2 | TMEM175      | 4  | Homo sapiens MGC4618          | 4.0201E-10 | 5.7824E-08 | 2.55710184 |
|             | Hs.535044   | HS.535044    |    | PREDICTED: Homo sapiens s     | 0.00021158 | 0.0004397  | 2.55702015 |
| MAP2K3      | NM_145109.1 | MAP2K3       | 17 | Homo sapiens MAPKK3; PRKI     | 1.3983E-06 | 8.6157E-06 | 2.54897598 |
| FAM108B1    | NM_016014.2 | FAM108B1     | 9  | Homo sapiens CGI-67; RP11     | 0.00041757 | 0.00077588 | 2.54890104 |
| MLL5        | NM_182931.1 | MLL5         | 7  | Homo sapiens HDCMC04P; M      | 0.00740318 | 0.00887855 | 2.5448979  |
| LAMB2       | NM_002292.2 | LAMB2        | 3  | Homo sapiens LAMS             | 2.7894E-08 | 5.9116E-07 | 2.54025687 |
| RUSC2       | NM_014806.1 | RUSC2        | 9  | Homo sapiens KIAA0375; Ipc    | 0.00582981 | 0.00725337 | 2.53797949 |
| ETNK2       | NM_018208.1 | ETNK2        | 1  | Homo sapiens FLJ10761; HM     | 0.00017856 | 0.00038276 | 2.53795609 |
| TMEM217     | XM_929843.1 | TMEM217      | 6  | Homo sapiens DJ355M6.2        | 0.00662547 | 0.00807836 | 2.53711755 |
| USP35       | XM_942438.1 | USP35        | 11 | Homo sapiens ubiquitin speci  | 0.03285215 | 0.03120545 | 2.5334537  |
| TRAF3IP1    | NM_015650.2 | TRAF3IP1     | 2  | Homo sapiens MIP-T3; DKFZ     | 0.00652034 | 0.00797901 | 2.53167998 |
| SLC25A21    | NM_030631.1 | SLC25A21     | 14 | Homo sapiens MGC126570; (     | 0.00087786 | 0.00143835 | 2.52536921 |
| ZADH2       | NM_175907.3 | ZADH2        | 18 | Homo sapiens MGC45594         | 6.6288E-06 | 2.767E-05  | 2.52122913 |
| KLK8        | NM_144507.1 | KLK8         | 19 | Homo sapiens NRPN; NP; HN     | 0.00127648 | 0.00197947 | 2.51958017 |
| RHPN1       | NM_052924.1 | RHPN1        | 8  | Homo sapiens ODF5; RHPN;      | 1.4862E-05 | 5.2118E-05 | 2.5171572  |
| C5orf41     | NM_153607.1 | C5ORF41      | 5  | Homo sapiens DKFZp686G20      | 0.0010851  | 0.00172507 | 2.51146584 |
| LOC153561   | XM_936052.1 | LOC153561    |    | PREDICTED: Homo sapiens h     | 0.02511347 | 0.02508203 | 2.50746015 |
| KBTBD9      | XM_940375.1 | KBTBD9       | 2  | PREDICTED: Homo sapiens k     | 7.0276E-07 | 5.1859E-06 | 2.50688161 |
| MT1F        | NM_005949.1 | MT1F         | 16 | Homo sapiens MT1; MGC327      | 2.3324E-11 | 1.279E-08  | 2.50569785 |
| SNX33       | NM_153271.1 | SNX33        | 15 | Homo sapiens MGC32065; SI     | 0.00281998 | 0.00386783 | 2.50372761 |
| SLC30A1     | NM_021194.2 | SLC30A1      | 1  | Homo sapiens ZNT1; ZRC1       | 1.4743E-06 | 8.9393E-06 | 2.50368585 |
| MIR25       | NR_029498.1 | MIR25        |    | Homo sapiens microRNA 25 (    | 0.01852737 | 0.01929256 | 2.49896798 |
| LOC643031   | XM_926402.1 | LOC643031    | 5  | PREDICTED: Homo sapiens s     | 8.5676E-10 | 8.5423E-08 | 2.49873738 |
| TSPAN1      | NM_005727.2 | TSPAN1       | 1  | Homo sapiens NET-1; 90304     | 0.01983024 | 0.02046947 | 2.49530041 |
| RNF121      | NM_018320.3 | RNF121       | 11 | Homo sapiens FLJ11099         | 1.1361E-06 | 7.3677E-06 | 2.4944975  |
| SENP7       | NM_00107720 | SENP7        | 3  | Homo sapiens KIAA1707; MC     | 0.00161459 | 0.00241295 | 2.49367254 |
| NLE1        | NM_018096.3 | NLE1         | 17 | Homo sapiens Nle; FLJ10458    | 2.5735E-05 | 7.9985E-05 | 2.49290837 |
| ATP8B2      | NM_00100585 | ATP8B2       | 1  | Homo sapiens ATPID; DKFZp     | 0.0035239  | 0.00470175 | 2.47979503 |
| C4orf33     | NM_173487.1 | C4ORF33      | 4  | Homo sapiens FLJ33703         | 6.8093E-05 | 0.00017484 | 2.47343044 |
| TBC1D9      | NM_015130.1 | TBC1D9       | 4  | Homo sapiens KIAA0882; MC     | 7.0368E-05 | 0.00017964 | 2.47107378 |
| LRRC37A4    | NR_002940.1 | LRRC37A4     | 17 | Homo sapiens KIAA0563; FL     | 0.01514252 | 0.01626398 | 2.470158   |
| LOC644083   | XM_930110.1 | LOC644083    | 1  | PREDICTED: Homo sapiens h     | 0.0190222  | 0.01973756 | 2.4627281  |
|             | Hs.560736   | HS.560736    |    | 2 UI-H-BI4-aph-d-11-0-UI.s1 f | 0.00413347 | 0.00540171 | 2.45818658 |
| CRLF1       | NM_004750.2 | CRLF1        | 19 | Homo sapiens CISS; CISS1;     | 1.2483E-06 | 7.8909E-06 | 2.4571128  |
| PPP1R13B    | NM_015316.1 | PPP1R13B     | 14 | Homo sapiens p53BP2-like; p   | 6.4788E-07 | 4.9089E-06 | 2.45685162 |
| TUFT1       | NM_020127.1 | TUFT1        | 1  | Homo sapiens tuftelin 1 (TUF  | 2.7099E-09 | 1.4498E-07 | 2.45670892 |
| KCNS3       | NM_002252.3 | KCNS3        | 2  | Homo sapiens MGC9481; KV      | 4.0896E-06 | 1.9312E-05 | 2.45648787 |
| C16orf70    | NM_025187.3 | C16ORF70     | 16 | Homo sapiens lin-10; C16orf   | 0.0019108  | 0.00278494 | 2.4548601  |
| C14orf78    | XM_941311.1 | C14ORF78     |    | PREDICTED: Homo sapiens c     | 2.0899E-08 | 5.0239E-07 | 2.45450939 |
| GM2A        | NM_000405.3 | GM2A         | 5  | Homo sapiens SAP-3            | 0.00012527 | 0.00028698 | 2.45415395 |
| PPP1R12C    | NM_017607.1 | PPP1R12C     | 19 | Homo sapiens p84; DKFZp43     | 2.3337E-05 | 7.4349E-05 | 2.45070336 |
| TTY5        | NR_001541.1 | TTY5         |    | Homo sapiens TTY5             | 0.0014841  | 0.00224935 | 2.45052828 |
| SP100       | NM_00108039 | SP100        | 2  | Homo sapiens DKFZp686E07      | 0.00014928 | 0.00033067 | 2.4482979  |
| MIR1204     | NR_031609.1 | MIR1204      |    | Homo sapiens microRNA 120     | 0.04023901 | 0.03699257 | 2.44081941 |
| NAV3        | NM_014903.3 | NAV3         | 12 | Homo sapiens unc53H3; STE     | 0.00058751 | 0.00102994 | 2.43624129 |
| LACTB       | NM_171846.1 | LACTB        | 15 | Homo sapiens FLJ14902; G2     | 4.8856E-06 | 2.2039E-05 | 2.43604113 |

## 5.0 ACL-Indepen Upreg

|             |             |              |    |                              |            |            |            |
|-------------|-------------|--------------|----|------------------------------|------------|------------|------------|
| CCDC28B     | NM_024296.3 | CCDC28B      | 1  | Homo sapiens RP4-622L5.5;    | 0.0147077  | 0.01586103 | 2.42886499 |
| MOCS1       | NM_138928.1 | MOCS1        | 6  | Homo sapiens MOCS1B; MIG     | 0.00010598 | 0.00025153 | 2.42581465 |
| KRTDAP      | NM_207392.1 | KRTDAP       | 19 | Homo sapiens MGC163373; I    | 2.602E-05  | 8.0699E-05 | 2.42190521 |
| KIAA0895    | NM_015314.1 | KIAA0895     | 7  | Homo sapiens KIAA0895 (KI    | 0.00049046 | 0.00088655 | 2.42000429 |
| DGKD        | NM_152879.2 | DGKD         | 2  | Homo sapiens KIAA0145; dg    | 0.00061961 | 0.00107504 | 2.41889513 |
| SLC35E3     | NM_018656.2 | SLC35E3      | 12 | Homo sapiens BLOV1           | 1.3617E-05 | 4.8469E-05 | 2.41467166 |
| DNAJC5      | NM_025219.1 | DNAJC5       | 20 | Homo sapiens CSP; DKFZP43    | 0.00412043 | 0.00538787 | 2.41296415 |
| NOD1        | NM_006092.1 | NOD1         | 7  | Homo sapiens NLR1; CARD      | 0.00167998 | 0.00249453 | 2.41273062 |
| CHMP6       | NM_024591.3 | CHMP6        |    | PREDICTED: Homo sapiens c    | 0.00972827 | 0.01121185 | 2.40612892 |
|             | Hs.572538   | HS.572538    |    | AGENCOURT_15364206 Hurr      | 0.0024334  | 0.00342103 | 2.4058307  |
| MYO1D       | NM_015194.1 | MYO1D        | 17 | Homo sapiens KIAA0727; my    | 7.2622E-07 | 5.3011E-06 | 2.40547292 |
| LOC729776   | Hs.535844   | LOC729776    | 6  | PREDICTED: Homo sapiens h    | 5.8071E-06 | 2.4952E-05 | 2.40493518 |
| PRPH        | NM_006262.3 | PRPH         | 12 | Homo sapiens PRPH1; NEF4     | 1.6214E-07 | 1.8994E-06 | 2.40252288 |
| PTGER4      | NM_000958.2 | PTGER4       | 5  | Homo sapiens EP4R; MGC12     | 0.00115471 | 0.00181893 | 2.40151447 |
| LOC10013377 | XM_00171384 | LOC100133770 |    | PREDICTED: Homo sapiens s    | 0.0222999  | 0.02264051 | 2.40053985 |
| C20orf108   | NM_080821.1 | C20ORF108    | 20 | Homo sapiens DLK1; FZP434A11 | 4.7425E-09 | 1.9354E-07 | 2.39834233 |
| FKBP10      | NM_021939.2 | FKBP10       | 17 | Homo sapiens FLJ22041; hF    | 0.0009241  | 0.00150316 | 2.39576417 |
| ARSB        | NM_198709.1 | ARSB         | 5  | Homo sapiens MP56; ASB; G    | 0.00108631 | 0.00172606 | 2.39224092 |
| RNU1F1      | NR_004402.1 | RNU1F1       | 14 | Homo sapiens U1F; HSD7       | 4.2456E-06 | 1.9867E-05 | 2.39126144 |
| LIN7C       | NM_018362.2 | LIN7C        | 11 | Homo sapiens LIN-7C; MALS    | 0.01012606 | 0.01158963 | 2.3888008  |
| CHRD12      | NM_015424.3 | CHRD12       | 11 | Homo sapiens DKFZp586N21     | 0.00355426 | 0.00473362 | 2.38574316 |
| FAM71E1     | NM_138411.1 | FAM71E1      | 19 | Homo sapiens FLJ27522; FLJ   | 5.0823E-10 | 6.5576E-08 | 2.38425245 |
| RFXDC2      | NM_022841.2 | RFXDC2       |    | Homo sapiens MGC131836; I    | 0.00842168 | 0.0099197  | 2.38187137 |
| IFRD1       | NM_001550.2 | IFRD1        | 7  | Homo sapiens PC4; TIS7       | 1.3462E-07 | 1.6707E-06 | 2.37808138 |
| CKMT1A      | NM_00101500 | CKMT1A       | 15 | Homo sapiens UMTCK; CKMT     | 3.5776E-09 | 1.7343E-07 | 2.37364561 |
|             | Hs.112932   | HS.112932    | 8  | ag03b01.s1 Soares_testis_NI  | 0.02024593 | 0.02083239 | 2.37136019 |
| NUMBL       | NM_004756.2 | NUMBL        | 19 | Homo sapiens NUMB-R; TNR     | 0.04530056 | 0.04091272 | 2.37012153 |
| PDK3        | NM_005391.1 | PDK3         |    | Homo sapiens pyruvate dehy   | 0.00034846 | 0.0006661  | 2.36987443 |
| CAMTA1      | NM_015215.1 | CAMTA1       | 1  | Homo sapiens KIAA0833        | 2.2323E-07 | 2.3234E-06 | 2.36600319 |
| LOC400304   | XM_375152.3 | LOC400304    | 15 | PREDICTED: Homo sapiens s    | 4.1835E-08 | 7.5996E-07 | 2.36509922 |
| LOC653066   | XM_930921.1 | LOC653066    | 2  | PREDICTED: Homo sapiens s    | 0.00120098 | 0.00188068 | 2.36114374 |
| C2orf7      | NM_032319.1 | C2ORF7       | 2  | Homo sapiens PAP21; MGC1     | 1.742E-06  | 1.0176E-05 | 2.36029317 |
| ITFG3       | NM_032039.1 | ITFG3        | 16 | Homo sapiens FLJ32603; DK    | 3.6448E-08 | 6.9976E-07 | 2.3564996  |
| SCARNA16    | NR_003013.1 | SCARNA16     | 17 | Homo sapiens ACA47           | 8.5316E-08 | 1.2192E-06 | 2.35560473 |
| XKR8        | NM_018053.2 | XKR8         | 1  | Homo sapiens XKR8; FLJ103    | 0.00267964 | 0.00370838 | 2.35199642 |
| LOC728969   | XM_00113292 | LOC728969    | 1  | PREDICTED: Homo sapiens s    | 9.5336E-07 | 6.4693E-06 | 2.35007229 |
| LOC651936   | XM_941213.1 | LOC651936    |    | PREDICTED: Homo sapiens h    | 0.03278595 | 0.03115944 | 2.34872591 |
| SLC25A20    | XM_941287.1 | SLC25A20     |    | PREDICTED: Homo sapiens s    | 0.00029714 | 0.00058337 | 2.34849537 |
| SALL4       | NM_020436.2 | SALL4        | 20 | Homo sapiens MGC133050; I    | 0.00167425 | 0.00248727 | 2.34362759 |
| DTNA        | NM_032981.2 | DTNA         | 18 | Homo sapiens D18S892E; D1    | 0.02824682 | 0.02759577 | 2.34323628 |
| SIRT7       | NM_016538.1 | SIRT7        | 17 | Homo sapiens SIR2L7; MGC1    | 1.6263E-07 | 1.9E-06    | 2.34007105 |
| FLJ20489    | NM_017842.1 | FLJ20489     | 12 | Homo sapiens hypothetical p  | 8.2532E-05 | 0.00020514 | 2.3392625  |
| DISP1       | NM_032890.2 | DISP1        | 1  | Homo sapiens DKFZP434I04;    | 0.00011123 | 0.0002608  | 2.33392189 |
| RNU1-3      | NR_004408.1 | RNU1-3       | 1  | Homo sapiens U1C21           | 2.5461E-08 | 5.6844E-07 | 2.33252862 |
| LOC441711   | XR_017229.2 | LOC441711    | 15 | PREDICTED: Homo sapiens n    | 0.01008866 | 0.01155587 | 2.32771481 |
| CHST12      | NM_018641.2 | CHST12       | 7  | Homo sapiens C4S-2; C4ST2    | 0.00338736 | 0.00453752 | 2.32546229 |
| TRIM68      | NM_018073.5 | TRIM68       | 11 | Homo sapiens MGC126176; I    | 1.581E-06  | 9.4625E-06 | 2.32347316 |
| ZNF775      | NM_173680.2 | ZNF775       | 7  | Homo sapiens MGC33584        | 0.00896486 | 0.01046676 | 2.3228068  |
| EXOC1       | NM_018261.3 | EXOC1        | 4  | Homo sapiens SEC3L1; Sec3    | 9.8478E-05 | 0.00023692 | 2.32003344 |
|             | Hs.555260   | HS.555260    |    | 17000532215901 GRN_ES H      | 0.00632843 | 0.00778106 | 2.31951719 |
| SLC6A9      | NM_201649.2 | SLC6A9       | 1  | Homo sapiens DKFZp547A11     | 0.00164378 | 0.00245031 | 2.31804705 |
| FAM113A     | NM_022760.3 | FAM113A      | 20 | Homo sapiens C20orf81; bA1   | 8.2604E-06 | 3.2618E-05 | 2.31493553 |
| ZNF484      | NM_031486.1 | ZNF484       | 9  | Homo sapiens MGC133034; I    | 0.03871728 | 0.03586038 | 2.3101654  |
|             | Hs.565491   | HS.565491    | 2  | xf55f09.x1 NCI_CGAP_Gas4     | 0.01171169 | 0.01311697 | 2.30959293 |
| OR4A16      | NM_00100527 | OR4A16       | 11 | Homo sapiens OR11-117; OF    | 0.04186128 | 0.03825548 | 2.30383689 |
| GOLPH4      | NM_014498.2 | GOLPH4       | 3  | Homo sapiens P138; GIMPC;    | 1.9385E-05 | 6.445E-05  | 2.30188036 |
| ZNF558      | NM_144693.1 | ZNF558       | 19 | Homo sapiens FLJ30932        | 9.8967E-07 | 6.6693E-06 | 2.30020825 |
| MAP3K12     | NM_006301.2 | MAP3K12      | 12 | Homo sapiens DLK; ZPKP1; I   | 6.8336E-06 | 2.8335E-05 | 2.29568662 |
| ATP6V1C1    | NM_001695.3 | ATP6V1C1     | 8  | Homo sapiens VATC; FLJ200    | 1.0376E-05 | 3.9173E-05 | 2.29473508 |
| IFIH1       | NM_022168.2 | IFIH1        | 2  | Homo sapiens MDAS; MGC13     | 0.01494849 | 0.01607526 | 2.29091735 |
| RNU1G2      | NR_004426.1 | RNU1G2       | 1  | Homo sapiens U1D2; U1B2;     | 4.8954E-10 | 6.5079E-08 | 2.28873417 |
| RAB18       | NM_021252.3 | RAB18        | 10 | Homo sapiens RAB18L1         | 5.2603E-05 | 0.00014227 | 2.28771615 |
| C6orf203    | NM_016487.2 | C6ORF203     | 6  | Homo sapiens RP11-59I9.1;    | 3.986E-08  | 7.4412E-07 | 2.28729386 |
| ZSWIM6      | XM_035299.7 | ZSWIM6       | 5  | PREDICTED: Homo sapiens z    | 1.6731E-07 | 1.924E-06  | 2.2849851  |
| CELSR3      | NM_001407.1 | CELSR3       | 3  | Homo sapiens FMI1; RESDA1    | 2.1996E-07 | 2.3197E-06 | 2.28423281 |
| TRAF4       | NM_004295.2 | TRAF4        | 17 | Homo sapiens FNF83; MLN6;    | 0.0492341  | 0.04378471 | 2.27406425 |
| ZNF18       | NM_144680.2 | ZNF18        | 17 | Homo sapiens KOX11; ZKSC     | 9.2549E-06 | 3.5678E-05 | 2.27344567 |
| PARM1       | NM_015393.2 | PARM1        | 4  | Homo sapiens prostate andrc  | 1.3843E-09 | 1.0942E-07 | 2.27317807 |
|             | Hs.572495   | HS.572495    | 17 | Homo sapiens cDNA clone IM   | 0.00620038 | 0.00765364 | 2.26927751 |
| OS9         | NM_006812.2 | OS9          | 12 | Homo sapiens amplified in os | 0.00013633 | 0.00030702 | 2.26776033 |

## 5.0 ACL-Indepen Upreg

|             |                         |                                 |            |            |            |
|-------------|-------------------------|---------------------------------|------------|------------|------------|
| YPCL3       | NM_031477.3 YPCL3       | 16 Homo sapiens MGC10500        | 0.00174512 | 0.00257989 | 2.26286863 |
| FAM25A      | XM_00172378 FAM25A      | PREDICTED: Homo sapiens fr      | 0.04673356 | 0.04193498 | 2.26188726 |
| ZC3H10      | NM_032786.1 ZC3H10      | 12 Homo sapiens FLJ14451; ZC:   | 2.8288E-05 | 8.624E-05  | 2.25979066 |
| ULBP2       | NM_025217.2 ULBP2       | 6 Homo sapiens RAET1H; N2DI     | 1.4607E-08 | 4.0175E-07 | 2.25448402 |
| H2AFJ       | NM_177925.1 H2AFJ       | 12 Homo sapiens FLJ10903; MG    | 1.3865E-07 | 1.7014E-06 | 2.25425923 |
| LOC728170   | XR_015330.2 LOC728170   | 12 PREDICTED: Homo sapiens n    | 0.04449524 | 0.04028908 | 2.24597544 |
| PRF1        | NM_005041.3 PRF1        | 10 Homo sapiens HPLH2; FLH2;    | 0.00285714 | 0.00391329 | 2.24376784 |
| PMS2L3      | NM_00100368 PMS2L3      | 7 Homo sapiens PMS5; MGC12      | 1.9828E-05 | 6.5452E-05 | 2.23913542 |
| CEBPA       | NM_004364.2 CEBPA       | 19 Homo sapiens CEBP; C/EBP-;   | 4.535E-06  | 2.0822E-05 | 2.23803654 |
| SLCO1B3     | NM_019844.1 SLCO1B3     | 12 Homo sapiens LST-3TM13; S    | 5.1427E-05 | 0.00013983 | 2.23641615 |
| ODF2L       | NM_020729.1 ODF2L       | 1 Homo sapiens MGC111060; c     | 0.03258926 | 0.03102627 | 2.23564046 |
| FAM195B     | NM_207368.1 FAM195B     | 17 Homo sapiens DKFZp686A17     | 5.332E-07  | 4.2881E-06 | 2.2329548  |
| PRSS22      | NM_022119.3 PRSS22      | 16 Homo sapiens hBSSP-4; MGC    | 0.0025257  | 0.00352537 | 2.2314088  |
| MICA        | NM_000247.1 MICA        | 6 Homo sapiens PERB11.1; MG     | 5.7603E-07 | 4.5166E-06 | 2.23133653 |
| FAM8A1      | NM_016255.1 FAM8A1      | 6 Homo sapiens FLJ23721; AH     | 1.8252E-06 | 1.0515E-05 | 2.23108703 |
| ZDHHC11     | XM_940764.1 ZDHHC11     | 5 Homo sapiens ZNF399; FLJ1:    | 2.8296E-05 | 8.6206E-05 | 2.23090998 |
| LYSMD4      | NM_152449.2 LYSMD4      | 15 Homo sapiens MGC99501; FL    | 7.3824E-08 | 1.0997E-06 | 2.23002732 |
| SMARCA2     | NM_003070.3 SMARCA2     | 9 Homo sapiens Sth1p; SNF2L     | 1.9848E-06 | 1.1171E-05 | 2.22931896 |
| GPR176      | NM_007223.1 GPR176      | 15 Homo sapiens Gm1012; GPR     | 0.04890603 | 0.04355034 | 2.22792215 |
| TMEM45A     | NM_018004.1 TMEM45A     | 3 Homo sapiens DERP7; FLJ10     | 3.9463E-06 | 1.8767E-05 | 2.22544501 |
| DGCR14      | NM_022719.1 DGCR14      | 22 Homo sapiens ES2; DGSI; D    | 7.1404E-05 | 0.00018186 | 2.22168343 |
| ST3GAL5     | NM_003896.2 ST3GAL5     | 2 Homo sapiens SIAT9; ST3Ga     | 5.6388E-07 | 4.4572E-06 | 2.22123681 |
| FAM116B     | NM_00100179 FAM116B     | Homo sapiens MGC33692           | 3.5633E-07 | 3.2265E-06 | 2.21636588 |
| CORO7       | NM_024535.1 CORO7       | 16 Homo sapiens FLJ22021; O6:   | 5.8132E-05 | 0.00015363 | 2.21604204 |
| ZNF23       | NM_145911.1 ZNF23       | 16 Homo sapiens KOX16; Zfp61    | 3.1917E-07 | 3.0015E-06 | 2.21312567 |
| C11orf61    | NM_024631.1 C11ORF61    | 11 Homo sapiens FLJ23342        | 0.01379042 | 0.01502696 | 2.21177786 |
| GRRP1       | NM_024869.1 GRRP1       | 1 Homo sapiens RP11-96L14.5     | 0.02588055 | 0.02567571 | 2.20883933 |
| ZNF532      | NM_018181.4 ZNF532      | 18 Homo sapiens FLJ10697        | 9.847E-07  | 6.646E-06  | 2.20880825 |
| TRAPPC2     | NM_00101165 TRAPPC2     | Homo sapiens hYP38334; TR       | 2.5695E-05 | 7.9888E-05 | 2.20520077 |
| LRTOMT      | NM_145309.1 LRTOMT      | 11 Homo sapiens leucine rich tr | 7.5582E-05 | 0.00019056 | 2.2040559  |
| KIAA1539    | NM_025182.2 KIAA1539    | 9 Homo sapiens P1.11659_5; F    | 3.7984E-05 | 0.00010941 | 2.202708   |
| LOC10012827 | XM_00172555 LOC10012827 | 9 PREDICTED: Homo sapiens h     | 0.0001292  | 0.0002943  | 2.20192162 |
| ABHD6       | NM_020676.4 ABHD6       | 3 Homo sapiens abhydrolase d    | 2.9814E-08 | 6.184E-07  | 2.19892318 |
| CD82        | NM_002231.3 CD82        | 11 Homo sapiens SAR2; TSPAN2    | 0.00043688 | 0.00080445 | 2.19783296 |
| DERPC       | NM_017804.3 DERPC       | 16 Homo sapiens FLJ20400; CTI   | 0.00011178 | 0.00026161 | 2.19495982 |
| LOC642869   | XM_926257.1 LOC642869   | PREDICTED: Homo sapiens s       | 0.04954788 | 0.04399687 | 2.19439481 |
| FAM46B      | NM_052943.2 FAM46B      | 1 Homo sapiens MGC16491; M      | 1.4795E-07 | 1.7758E-06 | 2.19434101 |
| LOC401152   | NM_00100170 LOC401152   | 4 Homo sapiens HCV F-transac    | 0.00294812 | 0.00402159 | 2.18920283 |
| MTF1        | NM_005955.1 MTF1        | 1 Homo sapiens MGC23036; ZI     | 5.3372E-07 | 4.2884E-06 | 2.18497948 |
| GPR137B     | NM_003272.1 GPR137B     | 1 Homo sapiens TM7SF1           | 0.00077721 | 0.00129964 | 2.18242052 |
| FSTL3       | NM_005860.1 FSTL3       | 19 Homo sapiens FLRG; FSRP      | 4.1501E-05 | 0.00011739 | 2.18189931 |
| NUDT7       | NM_00110566 NUDT7       | 16 Homo sapiens nudix (nucleos  | 4.214E-09  | 1.8304E-07 | 2.18015994 |
| TOR1B       | NM_014506.1 TOR1B       | 9 Homo sapiens DQ1; MGC438      | 2.8262E-06 | 1.4552E-05 | 2.1769278  |
| TMEM194B    | NM_00114264 TMEM194B    | 2 Homo sapiens transmembrar     | 0.02090843 | 0.02140364 | 2.1751102  |
| HS1BP3      | NM_022460.3 HS1BP3      | 2 Homo sapiens ETM2; FLJ142:    | 8.4948E-08 | 1.2159E-06 | 2.17331552 |
| LOC643662   | XM_926967.1 LOC643662   | 12 PREDICTED: Homo sapiens h    | 0.04988928 | 0.04424182 | 2.17307451 |
| CECR7       | XM_927968.1 CECR7       | 22 PREDICTED: Homo sapiens c    | 0.00028102 | 0.00055596 | 2.17138319 |
| HTR7        | NM_000872.3 HTR7        | 10 Homo sapiens 5-HT7           | 0.00882528 | 0.01032854 | 2.16903552 |
| LOC10013256 | XM_00171397 LOC10013256 | 11 PREDICTED: Homo sapiens s    | 0.01477459 | 0.01592143 | 2.16830191 |
| GALT        | NM_000155.2 GALT        | 9 Homo sapiens galactose-1-pl   | 0.00012883 | 0.00029375 | 2.16724112 |
|             | Hs.561599               | UI-E-E01-aiz-a-04-0-UI.r1 U     | 0.04271243 | 0.03892386 | 2.1657349  |
| NICN1       | NM_032316.2 NICN1       | 3 Homo sapiens MGC12936         | 1.9669E-05 | 6.5173E-05 | 2.16397694 |
| FAM13B      | NM_00110180 FAM13B      | 5 Homo sapiens KHCHP; MGC5      | 1.1112E-08 | 3.3971E-07 | 2.16357344 |
| ENPEP       | NM_001977.2 ENPEP       | 4 Homo sapiens APA; gp160; C    | 0.00723698 | 0.00870541 | 2.16087346 |
| CTNS        | NM_004937.1 CTNS        | 17 Homo sapiens CTNS-LSB; PQ    | 0.00010984 | 0.00025832 | 2.15987708 |
| UNC13B      | NM_006377.2 UNC13B      | 9 Homo sapiens hmunc13; Unc     | 0.00402329 | 0.00527895 | 2.15960887 |
| ZNF326      | NM_181781.2 ZNF326      | 1 Homo sapiens FLJ20403; dJ8    | 0.0224401  | 0.02276178 | 2.15937512 |
| ABHD15      | NM_198147.1 ABHD15      | 17 Homo sapiens abhydrolase d   | 8.8173E-06 | 3.4307E-05 | 2.15666274 |
| NAPB        | NM_022080.1 NAPB        | 20 Homo sapiens SNAP-BETA; N    | 1.6265E-06 | 9.6754E-06 | 2.15279245 |
| GPR108      | NM_00108045 GPR108      | 19 Homo sapiens LUSTR2; MGC     | 5.0598E-06 | 2.2558E-05 | 2.15003804 |
| DDAH2       | NM_013974.1 DDAH2       | 6 Homo sapiens DDAHII; NG3      | 0.00099239 | 0.00159737 | 2.14868913 |
| CSRNP2      | NM_030809.1 CSRNP2      | 12 Homo sapiens FLJ25576; C1:   | 1.7156E-07 | 1.9549E-06 | 2.14764136 |
| C11orf63    | NM_024806.2 C11ORF63    | 11 Homo sapiens FLJ23554        | 0.00679728 | 0.008258   | 2.14692294 |
|             | Hs.483906               | Homo sapiens mRNA; cDNA I       | 1.2854E-05 | 4.6413E-05 | 2.14460015 |
| TBC1D2      | NM_018421.2 TBC1D2      | 9 Homo sapiens FLJ10702; DK     | 0.00054975 | 0.00097623 | 2.14319238 |
| CCDC127     | NM_145265.2 CCDC127     | 5 Homo sapiens FLJ25701         | 0.02356632 | 0.02375039 | 2.14317563 |
|             | Hs.4988                 | 2 Homo sapiens mRNA; cDNA I     | 1.2025E-08 | 3.5405E-07 | 2.14185925 |
| GNB3        | NM_002075.2 GNB3        | 12 Homo sapiens guanine nucle   | 0.00685511 | 0.008311   | 2.13395485 |
| UNC13D      | NM_199242.1 UNC13D      | 17 Homo sapiens Munc13-4; FH    | 0.03045698 | 0.02935943 | 2.13364073 |
| PLXNA1      | NM_032242.2 PLXNA1      | 3 Homo sapiens NOV; PLXN1; I    | 9.9805E-07 | 6.7E-06    | 2.13076031 |

## 5.0 ACL-Indepen Upreg

|             |             |             |    |                           |                |            |            |            |
|-------------|-------------|-------------|----|---------------------------|----------------|------------|------------|------------|
| SNAP29      | NM_004782.2 | SNAP29      | 22 | Homo sapiens              | CEDNIK; SNAI   | 2.9546E-06 | 1.5063E-05 | 2.12950995 |
| C17orf28    | NM_030630.1 | C17ORF28    | 17 | Homo sapiens              | FLJ43526; DM   | 0.00213693 | 0.00306713 | 2.12905207 |
| C5orf13     | NM_004772.1 | C5ORF13     | 5  | Homo sapiens              | PTZ17; D4S11   | 0.00554155 | 0.00694197 | 2.12863096 |
| LOC653438   | XM_929895.1 | LOC653438   | 1  | PREDICTED: Homo sapiens   | s              | 4.2424E-06 | 1.9863E-05 | 2.12812236 |
| KCTD20      | NM_173562.3 | KCTD20      | 6  | Homo sapiens              | MGC14254; d    | 1.1429E-06 | 7.3895E-06 | 2.12738747 |
| FLJ22795    | NM_025084.1 | FLJ22795    | 15 | Homo sapiens              | hypothetical p | 2.6509E-08 | 5.7857E-07 | 2.12620517 |
| C9orf45     | NM_030814.4 | C9ORF45     | 9  | PREDICTED: Homo sapiens   | c              | 1.4165E-05 | 5.0174E-05 | 2.12590558 |
| LOC162073   | NM_00103484 | LOC162073   | 16 | Homo sapiens              | MGC126798; l   | 0.00022649 | 0.00046495 | 2.12370005 |
| LOC10013446 | XM_00172128 | LOC10013446 | 7  | PREDICTED: Homo sapiens   | h              | 0.02217511 | 0.02253207 | 2.12362745 |
| LOC645166   | XM_00112944 | LOC645166   | 1  | PREDICTED: Homo sapiens   | s              | 3.7635E-09 | 1.7564E-07 | 2.12341263 |
| CREB3L4     | NM_130898.2 | CREB3L4     | 1  | Homo sapiens              | hJAL; CREB4;   | 0.00569741 | 0.00711285 | 2.12329459 |
| LOC729065   | XM_00112920 | LOC729065   | 4  | PREDICTED: Homo sapiens   | h              | 0.01332944 | 0.01460993 | 2.12259673 |
| FBXO17      | NM_148169.1 | FBXO17      | 19 | Homo sapiens              | FBXO26; MGC    | 0.00068439 | 0.00116576 | 2.12161977 |
| FKBP1B      | NM_054033.1 | FKBP1B      | 2  | Homo sapiens              | FKBP12.6; FK   | 0.00187005 | 0.00273555 | 2.11737478 |
| DCAF16      | NM_017741.2 | DCAF16      | 4  | Homo sapiens              | FLJ20280; MG   | 0.00803381 | 0.00952035 | 2.11681636 |
| AHNAK2      | NM_138420.2 | AHNAK2      | 14 | Homo sapiens              | KIAA2019; C1   | 1.1748E-07 | 1.5316E-06 | 2.11625496 |
| LOC649970   | XM_939056.1 | LOC649970   |    | PREDICTED: Homo sapiens   | s              | 3.0974E-09 | 1.5801E-07 | 2.11444301 |
|             | Hs.561144   | HS.561144   | 3  | UI-E-EJO-ahn-e-19-0-UI.s1 | L              | 0.04509637 | 0.04074508 | 2.11316168 |
| B4GALNT1    | NM_001478.2 | B4GALNT1    | 12 | Homo sapiens              | GALGT; GALN/   | 0.00131866 | 0.00203481 | 2.10943705 |
| LOC728901   | XR_015891.2 | LOC728901   | 17 | PREDICTED: Homo sapiens   | n              | 0.02912078 | 0.02829208 | 2.10856093 |
| NRGN        | NM_006176.1 | NRGN        | 11 | Homo sapiens              | RC3; hng       | 4.9753E-08 | 8.46E-07   | 2.10587807 |
| KIFAP3      | NM_014970.2 | KIFAP3      | 1  | Homo sapiens              | SMAP; Smg-G    | 4.2701E-08 | 7.6461E-07 | 2.10275724 |
| IPO13       | NM_014652.2 | IPO13       | 1  | Homo sapiens              | RANBP13; KIA   | 2.1636E-05 | 6.9948E-05 | 2.10082502 |
| GOSR2       | NM_054022.2 | GOSR2       | 17 | Homo sapiens              | GS27; MEMBR    | 0.00010908 | 0.0002568  | 2.10036425 |
| MPP1        | NM_002436.2 | MPP1        |    | Homo sapiens              | AAG12; EMP5!   | 1.7709E-05 | 5.9992E-05 | 2.09939134 |
| LRRC8A      | NM_019594.2 | LRRC8A      | 9  | Homo sapiens              | FLJ10337; KIA  | 5.7631E-05 | 0.00015277 | 2.09714265 |
| HIST1H1C    | NM_005319.3 | HIST1H1C    | 6  | Homo sapiens              | MGC3992; H1    | 1.1325E-08 | 3.4265E-07 | 2.09693487 |
| LOC728312   | XR_042486.1 | LOC728312   |    | PREDICTED: Homo sapiens   | n              | 0.0003187  | 0.0006181  | 2.09541689 |
| GRIN1       | NM_000832.5 | GRIN1       | 9  | Homo sapiens              | NMDAR1; NMD    | 1.2537E-07 | 1.5965E-06 | 2.09494902 |
| MPZL1       | NM_024569.3 | MPZL1       | 1  | Homo sapiens              | PZR; PZRa; PZ  | 7.3263E-08 | 1.0951E-06 | 2.09383551 |
| MLF1        | NM_022443.2 | MLF1        | 3  | Homo sapiens              | myeloid leuko  | 3.1126E-06 | 1.5597E-05 | 2.09378488 |
| LOC10013193 | XM_00172084 | LOC10013193 |    | PREDICTED: Homo sapiens   | s              | 0.03983837 | 0.03671658 | 2.09062092 |
| PCYOX1L     | NM_024028.2 | PCYOX1L     | 5  | Homo sapiens              | MGC3265        | 2.1376E-05 | 6.944E-05  | 2.09025567 |
| GLDN        | NM_181789.1 | GLDN        | 15 | Homo sapiens              | CRG-L2; UNC-   | 2.3049E-05 | 7.362E-05  | 2.08788418 |
| MCOLN1      | NM_020533.1 | MCOLN1      | 19 | Homo sapiens              | MSTP080; TRF   | 1.635E-05  | 5.639E-05  | 2.08718353 |
| SNORD13     | Hs.583806   | SNORD13     | 8  | Homo sapiens              | U13            | 7.1132E-08 | 1.0761E-06 | 2.08639478 |
| CSPG4       | NM_001897.3 | CSPG4       | 15 | Homo sapiens              | MSK16; MCSP    | 0.00309588 | 0.00419898 | 2.08497929 |
| CYTH1       | NM_017456.2 | CYTH1       | 17 | Homo sapiens              | FLJ41900; D1   | 2.8857E-06 | 1.4763E-05 | 2.08048888 |
| LPPR2       | NM_022737.1 | LPPR2       | 19 | Homo sapiens              | FLJ13055; DK   | 8.6596E-05 | 0.00021372 | 2.07895989 |
| HOXC4       | NM_014620.2 | HOXC4       | 12 | Homo sapiens              | cp19; HOX3E;   | 0.02411844 | 0.02423445 | 2.0779328  |
| LOC652968   | NM_00103766 | LOC652968   | 22 | Homo sapiens              | hypothetical p | 0.00441121 | 0.00569009 | 2.07569792 |
| CRIP2       | NM_001312.2 | CRIP2       | 14 | Homo sapiens              | CRP2; CRIP; E  | 7.7714E-08 | 1.146E-06  | 2.0755279  |
| ADAMTSL5    | NM_213604.1 | ADAMTSL5    | 19 | Homo sapiens              | THSD6          | 0.00044299 | 0.00081279 | 2.07489389 |
| SNORA40     | NR_002973.1 | SNORA40     | 11 | Homo sapiens              | ACA40          | 0.04561718 | 0.04116901 | 2.07298779 |
| VPS13A      | NM_033305.2 | VPS13A      | 9  | Homo sapiens              | KIAA0986; CH   | 1.2431E-06 | 7.8749E-06 | 2.07114033 |
| SUZ12P      | XM_934900.1 | SUZ12P      | 17 | PREDICTED: Homo sapiens   | s              | 0.00588749 | 0.00730958 | 2.07105782 |
| TAF5L       | NM_014409.3 | TAF5L       | 1  | Homo sapiens              | PAF65B         | 0.0297152  | 0.02878352 | 2.06830137 |
| CACNA1A     | NM_000068.2 | CACNA1A     | 19 | Homo sapiens              | FHM; CAV2.1;   | 0.0269209  | 0.02653381 | 2.06616111 |
| CYB561D2    | NM_007022.3 | CYB561D2    | 3  | Homo sapiens              | TSP10; 101F6   | 9.2608E-05 | 0.00022564 | 2.06516055 |
| HEXDC       | NM_173620.1 | HEXDC       | 17 | Homo sapiens              | FLJ23825       | 3.7464E-06 | 1.7972E-05 | 2.0651199  |
| LOC727896   | XR_038192.1 | LOC727896   |    | PREDICTED: Homo sapiens   | n              | 0.05245201 | 0.04610438 | 2.06466809 |
| WDR37       | NM_014023.3 | WDR37       | 10 | Homo sapiens              | KIAA0982; RP   | 1.4037E-07 | 1.7153E-06 | 2.06431277 |
| XPA         | NM_000380.2 | XPA         | 9  | Homo sapiens              | XP1; XPAC      | 0.01138302 | 0.0128028  | 2.0614181  |
| SNAP23      | NM_003825.2 | SNAP23      | 15 | Homo sapiens              | SNAP23A; SN/   | 0.00036081 | 0.00068582 | 2.060291   |
| FBXL2       | NM_012157.2 | FBXL2       | 3  | Homo sapiens              | FBL2; FBL3; D  | 4.0477E-07 | 3.5059E-06 | 2.06009265 |
| USP41       | XM_036729.4 | USP41       | 22 | PREDICTED: Homo sapiens   | u              | 0.03456926 | 0.03259303 | 2.05766082 |
| C7orf38     | NM_145111.2 | C7ORF38     | 7  | Homo sapiens              | FLJ36794; DK   | 7.4426E-05 | 0.00018792 | 2.05584645 |
| CXorf40A    | NM_178124.3 | CXORF40A    |    | Homo sapiens              | EOLA1; CXorf   | 2.2446E-05 | 7.2088E-05 | 2.05371158 |
| AOAH        | NM_001637.1 | AOAH        | 7  | Homo sapiens              | acyloxyacyl hy | 0.00019367 | 0.00040996 | 2.0537104  |
| LOC10012938 | NR_024490.1 | LOC10012938 | 15 | Homo sapiens              | hypothetical L | 0.04939085 | 0.04389742 | 2.0536962  |
| UBE2W       | NM_018299.2 | UBE2W       | 8  | Homo sapiens              | FLJ11011; hUI  | 0.0006504  | 0.00111785 | 2.04790771 |
|             | Hs.571245   | HS.571245   | 7  | 603034918F1 NIH_MGC_115   |                | 0.00613964 | 0.00759149 | 2.0459156  |
| SCARNA9     | NR_002569.1 | SCARNA9     | 11 | Homo sapiens              | Z32; mgU2-1C   | 6.7005E-08 | 1.0369E-06 | 2.0450786  |
|             | Hs.572073   | HS.572073   | 11 | 603178081F1 NIH_MGC_121   |                | 0.00263263 | 0.00365254 | 2.04371825 |
| SPIRE2      | NM_032451.1 | SPIRE2      | 16 | Homo sapiens              | MGC117166; S   | 5.9843E-06 | 2.5563E-05 | 2.04371102 |
| RASA4P      | NR_024116.2 | RASA4P      | 7  | Homo sapiens              | RAS p21 prote  | 0.00461074 | 0.00591874 | 2.04035394 |
| ETFDH       | NM_004453.1 | ETFDH       | 4  | Homo sapiens              | MADD; ETFQO    | 1.3423E-07 | 1.6705E-06 | 2.03727789 |
| MOAP1       | NM_022151.4 | MOAP1       | 14 | Homo sapiens              | MAP-1; PNMA    | 3.2985E-08 | 6.6227E-07 | 2.02962094 |
| NUBP2       | NM_012225.1 | NUBP2       | 16 | Homo sapiens              | CFD1; NUBP1    | 0.00391513 | 0.00515244 | 2.02693204 |
| MTL5        | NM_00103965 | MTL5        | 11 | Homo sapiens              | TESMIN; MTLT   | 0.00133561 | 0.00205771 | 2.02613933 |

## 5.0 ACL-Indepen Upreg

|             |                         |                                 |            |            |            |
|-------------|-------------------------|---------------------------------|------------|------------|------------|
| CLDN14      | NM_144492.1 CLDN14      | 21 Homo sapiens DFNB29          | 0.00028176 | 0.0005573  | 2.025673   |
| GFOD1       | NM_018988.1 GFOD1       | 6 Homo sapiens glucose-fructo   | 1.1875E-05 | 4.3684E-05 | 2.025487   |
| MGC3020     | NM_024048.2 MGC3020     | 16 Homo sapiens hypothetical p  | 0.04392859 | 0.03986239 | 2.02431035 |
| YPEL5       | NM_016061.1 YPEL5       | 2 Homo sapiens CGI-127          | 4.9226E-09 | 1.9903E-07 | 2.02358448 |
| GNAI3       | NM_006496.1 GNAI3       | 1 Homo sapiens FLJ26559; 87L    | 0.00012011 | 0.00027697 | 2.02292858 |
| LOC10013232 | XM_00172061 LOC10013232 | 9 PREDICTED: Homo sapiens h     | 0.00019707 | 0.00041484 | 2.02279729 |
| SNORD3D     | NR_006882.1 SNORD3D     | 17 Homo sapiens U3-4            | 4.0471E-09 | 1.8025E-07 | 2.02272715 |
| TSPAN13     | NM_014399.3 TSPAN13     | 7 Homo sapiens FLJ22934; NE     | 3.1428E-10 | 5.6275E-08 | 2.02270482 |
| FAM43A      | NM_153690.4 FAM43A      | 3 Homo sapiens FLJ90022         | 9.8641E-05 | 0.00023725 | 2.01848755 |
| HBEGF       | NM_001945.1 HBEGF       | 5 Homo sapiens DTS; DTSF; HI    | 5.1412E-07 | 4.1845E-06 | 2.01500612 |
| C7orf36     | NM_020192.1 C7ORF36     | 7 Homo sapiens GK003            | 3.5231E-06 | 1.7211E-05 | 2.01372214 |
| KRTAP2-2    | XM_496261.2 KRTAP2-2    | PREDICTED: Homo sapiens k       | 0.0001529  | 0.00033757 | 2.01250557 |
| FAM73B      | NM_032809.2 FAM73B      | 9 Homo sapiens C9orf54; FLJ1    | 0.00033953 | 0.0006523  | 2.01136268 |
| LOC645236   | XM_928275.1 LOC645236   | 7 PREDICTED: Homo sapiens s     | 3.5094E-05 | 0.00010302 | 2.01068233 |
| KRT18P44    | XM_00172046 KRT18P44    | PREDICTED: Homo sapiens k       | 0.00957654 | 0.01106314 | 2.00850584 |
| PI4KAP1     | XM_942088.1 PI4KAP1     | 22 Homo sapiens FLJ39405        | 2.3504E-05 | 7.4747E-05 | 2.00567486 |
| CENTB2      | NM_012287.3 CENTB2      | 3 Homo sapiens KIAA0041; CN     | 0.02349867 | 0.02369855 | 2.00236072 |
| REEP1       | NM_022912.1 REEP1       | 2 Homo sapiens SPG31; C2orf     | 1.1386E-07 | 1.509E-06  | 2.00137998 |
| HABP4       | NM_014282.1 HABP4       | 9 Homo sapiens SERBP1L; IHA     | 1.9222E-09 | 1.2681E-07 | 2.00130519 |
| ARHGEF17    | NM_014786.2 ARHGEF17    | 11 Homo sapiens KIAA0337; P1    | 0.0364947  | 0.03412239 | 2.00007393 |
| MED26       | NM_004831.3 MED26       | 19 Homo sapiens CRSP70; CRSF    | 0.00425069 | 0.00552036 | 1.99970644 |
| SOX8        | NM_014587.2 SOX8        | 16 Homo sapiens MGC24837        | 1.0688E-07 | 1.4517E-06 | 1.99844645 |
| SLC29A4     | NM_00104066 SLC29A4     | 7 Homo sapiens PMAT; FLJ349     | 1.3754E-08 | 3.868E-07  | 1.99621996 |
| LOC221442   | NM_00101087 LOC221442   | 6 Homo sapiens FLJ46432         | 0.04614246 | 0.04150645 | 1.9954617  |
| RREB1       | NM_00100369 RREB1       | 6 Homo sapiens ras responsive   | 0.00227624 | 0.00323639 | 1.9942126  |
| CHD3        | NM_005852.2 CHD3        | 17 Homo sapiens Mi2-ALPHA; M    | 0.05391932 | 0.04726155 | 1.99380028 |
| ERI3        | NM_024066.1 ERI3        | 1 Homo sapiens MGC2683; PIN     | 0.00031167 | 0.00060675 | 1.99363865 |
| TMEM184A    | NM_152689.2 TMEM184A    | 7 Homo sapiens MGC9712; FLJ     | 0.00485478 | 0.00618586 | 1.99240245 |
| KLK3        | NM_00103005 KLK3        | 19 Homo sapiens HK3; APS; PS/   | 0.02387781 | 0.02401741 | 1.99122904 |
| SLC31A2     | NM_001860.1 SLC31A2     | 9 Homo sapiens hCTR2; CTR2;     | 0.00025735 | 0.00051788 | 1.99121692 |
| CERCAM      | NM_016174.3 CERCAM      | 9 Homo sapiens CEECAM1; MG      | 0.01751211 | 0.01841899 | 1.99121441 |
| IRF2BP2     | NM_182972.1 IRF2BP2     | 1 Homo sapiens MGC72189         | 3.073E-07  | 2.9243E-06 | 1.9910623  |
| OGFRL1      | NM_024576.3 OGFRL1      | 6 Homo sapiens dJ331H24.1; F    | 0.00516544 | 0.00652861 | 1.98955784 |
| RIPK4       | NM_020639.2 RIPK4       | 21 Homo sapiens MGC129992; /    | 0.00051291 | 0.00091917 | 1.98854882 |
| VASN        | NM_138440.1 VASN        | 16 Homo sapiens SLITL2          | 5.1217E-09 | 2.0151E-07 | 1.98578802 |
| NEDD4L      | NM_015277.2 NEDD4L      | 18 Homo sapiens FLJ33870; KIA   | 8.639E-05  | 0.0002134  | 1.985665   |
| LOC649917   | XR_036859.1 LOC649917   | PREDICTED: Homo sapiens n       | 4.2867E-05 | 0.00012036 | 1.98473668 |
| C12orf49    | NM_024738.1 C12ORF49    | 12 Homo sapiens FLJ21415        | 0.01983629 | 0.02047091 | 1.98367884 |
| LOC402509   | XM_935493.1 LOC402509   | PREDICTED: Homo sapiens s       | 3.1255E-07 | 2.9583E-06 | 1.98336352 |
| PUS3        | NM_031307.2 PUS3        | 11 Homo sapiens FKSG32; FLJ2    | 1.5965E-07 | 1.8778E-06 | 1.98277667 |
| RHOU        | NM_021205.4 RHOU        | 1 Homo sapiens WRCH1; CDC4      | 0.00026149 | 0.00052512 | 1.98097925 |
| CPLX1       | NM_006651.3 CPLX1       | 4 Homo sapiens CPX-I; CPX1      | 0.00048082 | 0.00087127 | 1.97982173 |
| MYCBP2      | NM_015057.2 MYCBP2      | 13 Homo sapiens FLJ21597; PAI   | 2.9787E-07 | 2.8657E-06 | 1.97848128 |
| HERC1       | NM_003922.2 HERC1       | 15 Homo sapiens p619; p532      | 2.2106E-07 | 2.3145E-06 | 1.97400766 |
| ZCCHC24     | NM_153367.1 ZCCHC24     | 10 Homo sapiens FLJ90798        | 0.00024609 | 0.00049901 | 1.97278638 |
| SH3BP5L     | NM_030645.1 SH3BP5L     | 1 Homo sapiens FLJ33845; KIA    | 4.0477E-07 | 3.5093E-06 | 1.97235505 |
| GHDC        | NM_032484.3 GHDC        | 17 Homo sapiens D11LGP1; LGF    | 2.2618E-05 | 7.2587E-05 | 1.97227708 |
| HCCS        | NM_005333.2 HCCS        | Homo sapiens MCOP57; DKF        | 8.223E-07  | 5.8091E-06 | 1.97226243 |
| RMND5B      | NM_022762.3 RMND5B      | 5 Homo sapiens FLJ22318; DK     | 0.00152317 | 0.00229588 | 1.97107757 |
| RNU1A3      | NR_004430.1 RNU1A3      | 1 Homo sapiens HSDJ1; U1A1      | 1.6062E-09 | 1.1365E-07 | 1.96665606 |
| CTAGE5      | NM_203356.1 CTAGE5      | 14 Homo sapiens MEA6; MGEA;     | 0.00613077 | 0.00758159 | 1.96608347 |
| OSGEPL1     | NM_022353.1 OSGEPL1     | 2 Homo sapiens O-sialoglycopr   | 0.00343322 | 0.00459263 | 1.9635629  |
| RIT1        | NM_006912.3 RIT1        | 1 Homo sapiens MGC125865; I     | 0.02848954 | 0.02778031 | 1.96148922 |
| STX1A       | NM_004603.1 STX1A       | 7 Homo sapiens HPC-1; STX1;     | 5.021E-09  | 1.9844E-07 | 1.96137721 |
| C7orf41     | NM_152793.1 C7ORF41     | 7 Homo sapiens FLJ25903; Ells   | 1.3453E-07 | 1.672E-06  | 1.96029647 |
| PCYT2       | NM_002861.1 PCYT2       | 17 Homo sapiens ET              | 5.359E-06  | 2.3475E-05 | 1.95976918 |
| FAM149B1    | NM_173348.1 FAM149B1    | 10 Homo sapiens family with sei | 4.8685E-06 | 2.1985E-05 | 1.95855507 |
| BAIAP2      | NM_017450.1 BAIAP2      | 17 Homo sapiens IRSP53; BAP2    | 3.5026E-08 | 6.906E-07  | 1.95655616 |
| LOC92659    | NR_015454.1 LOC92659    | 17 Homo sapiens hypothetical Li | 3.5686E-07 | 3.2212E-06 | 1.95390516 |
| LOC643896   | NM_00110138 LOC643896   | 2 Homo sapiens similar to cAM   | 0.03698928 | 0.03451861 | 1.95337726 |
| PPP1R14C    | NM_030949.1 PPP1R14C    | 6 Homo sapiens KEPI; NY-BR-8    | 7.8899E-08 | 1.1576E-06 | 1.95273873 |
| ARHGAP29    | NM_004815.2 ARHGAP29    | 1 Homo sapiens RP11-255E17.     | 0.00268156 | 0.00370987 | 1.95050847 |
| GSDMB       | NM_018530.1 GSDMB       | 17 Homo sapiens PRO2521; PP4    | 3.1449E-09 | 1.5858E-07 | 1.95043321 |
| APOBEC3H    | NM_181773.2 APOBEC3H    | 22 Homo sapiens dJ742C19.2; /   | 0.00032622 | 0.00063032 | 1.94779118 |
| TBC1D7      | NM_016495.2 TBC1D7      | 6 Homo sapiens DKFZp686N23      | 2.2986E-07 | 2.3699E-06 | 1.94523632 |
| SLC25A44    | NM_014655.1 SLC25A44    | 1 Homo sapiens FLJ90431; KIA    | 4.0623E-08 | 7.488E-07  | 1.94234885 |
| FTO         | NM_00108043 FTO         | 16 Homo sapiens KIAA1752; MC    | 0.00020783 | 0.00043365 | 1.94098657 |
| KLHL29      | XM_00171745 KLHL29      | 2 PREDICTED: Homo sapiens k     | 2.6264E-08 | 5.7466E-07 | 1.9391487  |
| IGHMBP2     | NM_002180.1 IGHMBP2     | 11 Homo sapiens SMARD1; SML     | 0.01063453 | 0.01209115 | 1.93853179 |
| HSDL1       | NM_031463.3 HSDL1       | 16 Homo sapiens MGC125994; I    | 5.257E-06  | 2.3202E-05 | 1.93778528 |



## 5.0 ACL-Indepen Upreg

|             |                         |                                 |            |            |            |
|-------------|-------------------------|---------------------------------|------------|------------|------------|
| RN5S9       | NR_023371.1 RN5S9       | 1 Homo sapiens RNA, 5S ribos    | 4.6154E-07 | 3.8567E-06 | 1.93610213 |
| LASS5       | NM_147190.1 LASS5       | 12 Homo sapiens Trh4; MGC454    | 7.8124E-05 | 0.00019585 | 1.9302936  |
| MT1X        | NM_005952.2 MT1X        | 16 Homo sapiens MT1; MT-1I      | 1.0357E-11 | 7.5725E-09 | 1.92909033 |
| GMPPB       | NM_021971.1 GMPPB       | 3 Homo sapiens KIAA1851         | 1.4853E-05 | 5.2107E-05 | 1.92778293 |
| PCTP        | NM_021213.1 PCTP        | 17 Homo sapiens STARD2          | 1.421E-06  | 8.7127E-06 | 1.92401047 |
| CDC14B      | NM_033332.1 CDC14B      | 9 Homo sapiens CDC14B3; hCl     | 6.0326E-07 | 4.6512E-06 | 1.9232374  |
| FOXO1       | NM_002015.2 FOXO1       | 13 Homo sapiens FKHR; FKH1; I   | 0.00144643 | 0.002201   | 1.92109877 |
| STAT3       | NM_213662.1 STAT3       | 17 Homo sapiens APRF; FLJ2088   | 5.5791E-08 | 9.1498E-07 | 1.91971137 |
| SAMD3       | NM_00101737.SAMD3       | 6 Homo sapiens MGC35163; Fl     | 0.00017594 | 0.00037826 | 1.91887329 |
| IRX3        | NM_024336.1 IRX3        | 16 Homo sapiens IRX-1           | 6.6195E-06 | 2.7657E-05 | 1.91858171 |
| GNGT1       | NM_021955.3 GNGT1       | 7 Homo sapiens GNG1             | 0.00319098 | 0.00431131 | 1.91772966 |
| LOC389203   | XM_371691.4 LOC389203   | PREDICTED: Homo sapiens h       | 0.01207451 | 0.01344609 | 1.91653586 |
| LRRC20      | NM_207119.1 LRRC20      | 10 Homo sapiens FLJ10751; FLJ   | 1.9768E-08 | 4.872E-07  | 1.91413707 |
| CORIN       | NM_006587.2 CORIN       | 4 Homo sapiens Lrp4; Tmprss     | 6.0479E-06 | 2.5772E-05 | 1.90826454 |
| CYB561D1    | NM_182580.2 CYB561D1    | 1 Homo sapiens cytochrome b-    | 1.1498E-07 | 1.5125E-06 | 1.90484571 |
| AKAP8L      | NM_014371.2 AKAP8L      | 19 Homo sapiens APRF; NAKA      | 8.308E-05  | 0.00020638 | 1.90227481 |
| C11orf74    | NM_138787.2 C11ORF74    | 11 Homo sapiens FLJ38678        | 1.0935E-08 | 3.3903E-07 | 1.90126183 |
| MYLIP       | NM_013262.3 MYLIP       | 6 Homo sapiens MIR              | 4.2411E-09 | 1.8331E-07 | 1.89963288 |
| LOC391692   | XM_373031.3 LOC391692   | 4 PREDICTED: Homo sapiens s     | 0.00181055 | 0.00266272 | 1.89944468 |
|             | Hs.402146 HS.402146     | 1 AGENCOURT_8911223 NIH_I       | 0.04662533 | 0.04186784 | 1.89853568 |
| CLEC11A     | NM_002975.2 CLEC11A     | 19 Homo sapiens LSLCL; P47; S   | 2.7249E-06 | 1.4189E-05 | 1.89714727 |
| UPLP        | NM_00111440.UPLP        | Homo sapiens uroplakin-like     | 1.3239E-08 | 3.7593E-07 | 1.89702398 |
| C1QTNF6     | NM_031910.3 C1QTNF6     | 22 Homo sapiens ZACRP6; CTRF    | 0.00721559 | 0.00868444 | 1.89640046 |
| C11orf67    | NM_024684.2 C11ORF67    | 11 Homo sapiens FLJ21035; MG    | 2.473E-08  | 5.6212E-07 | 1.89547456 |
| HIST1H2BM   | NM_003521.2 HIST1H2BM   | 6 Homo sapiens H2B/e; H2BFE     | 0.02755089 | 0.02704537 | 1.89424123 |
| LOC728979   | XR_038428.1 LOC728979   | PREDICTED: Homo sapiens n       | 0.02466813 | 0.02472732 | 1.89269714 |
| RFTN1       | NM_015150.1 RFTN1       | 3 Homo sapiens PIG9; RAFTLI     | 2.517E-05  | 7.8646E-05 | 1.88869257 |
| GFOD2       | NM_030819.2 GFOD2       | 16 Homo sapiens FLJ23802; MG    | 7.5189E-05 | 0.00018963 | 1.88808033 |
| GNB1L       | NM_053004.1 GNB1L       | 22 Homo sapiens GY2; DGCRK3     | 8.1953E-06 | 3.2463E-05 | 1.88807692 |
| PCDHGB6     | NM_018926.2 PCDHGB6     | 5 Homo sapiens PCDH-GAMMA       | 0.03112389 | 0.0298645  | 1.88793402 |
| SEC22B      | NM_004892.3 SEC22B      | 1 Homo sapiens SEC22L1; ERS     | 2.0525E-07 | 2.1908E-06 | 1.88663767 |
| SNX1        | NM_003099.3 SNX1        | 15 Homo sapiens SNX1A; Vps5;    | 0.00411618 | 0.00538312 | 1.88326027 |
| LOC441268   | NM_00101372.LOC441268   | 7 Homo sapiens hypothetical g   | 0.0068097  | 0.00826852 | 1.88267738 |
| LEPRE1      | NM_022356.2 LEPRE1      | 1 Homo sapiens P3H1; MGC11      | 1.305E-06  | 8.1496E-06 | 1.88266699 |
| VRK3        | NM_00102577.VRK3        | 19 Homo sapiens vaccinia relate | 9.932E-05  | 0.00023868 | 1.87877899 |
| SIPA1L2     | NM_020808.1 SIPA1L2     | 1 Homo sapiens SPAL2; FLJ23     | 4.378E-07  | 3.7258E-06 | 1.87864781 |
| TRIM21      | NM_003141.3 TRIM21      | 11 Homo sapiens RNF81; RO52;    | 0.00013948 | 0.00031292 | 1.87753353 |
| LOC10013399 | XM_00171678.LOC10013399 | PREDICTED: Homo sapiens h       | 0.00385905 | 0.00508551 | 1.87489071 |
| C1orf212    | NM_138428.2 C1ORF212    | 1 Homo sapiens FLJ90372; MG     | 0.00196454 | 0.00284954 | 1.87459007 |
| CLEC16A     | NM_015226.1 CLEC16A     | 16 Homo sapiens KIAA0350; Go    | 3.9444E-08 | 7.3949E-07 | 1.87442536 |
| RAB11FIP3   | NM_014700.2 RAB11FIP3   | 16 Homo sapiens KIAA0665; Ra    | 6.9811E-06 | 2.873E-05  | 1.87433763 |
| RNU1-5      | NR_004400.1 RNU1-5      | 1 Homo sapiens HSD4             | 6.0633E-10 | 7.2876E-08 | 1.87082265 |
| ERCC2       | NM_000400.2 ERCC2       | 19 Homo sapiens COFS2; EM9;     | 3.1466E-06 | 1.574E-05  | 1.86911126 |
| AMH         | NM_000479.2 AMH         | 19 Homo sapiens MIF; MIS        | 0.00680048 | 0.00826075 | 1.86906523 |
| GNG7        | NM_052847.1 GNG7        | 19 Homo sapiens FLJ00058        | 6.5864E-08 | 1.0283E-06 | 1.86848823 |
| TMEM185A    | NM_032508.1 TMEM185A    | Homo sapiens FAM11A; MGC        | 4.2366E-05 | 0.00011948 | 1.86799893 |
| PIP5K1C     | NM_012398.1 PIP5K1C     | 19 Homo sapiens PIP5Kgamma;     | 5.4447E-07 | 4.3468E-06 | 1.86729942 |
| MAPT        | NM_016841.2 MAPT        | 17 Homo sapiens MTBT2; MAPT     | 4.1255E-06 | 1.9419E-05 | 1.86558828 |
| NOXA1       | NM_006647.1 NOXA1       | 9 Homo sapiens MGC131800; I     | 1.9142E-06 | 1.0892E-05 | 1.86469544 |
| DST         | NM_020388.2 DST         | 6 Homo sapiens CATX-15; KIA     | 0.0020096  | 0.00290673 | 1.86384417 |
| LOC728229   | XM_943555.1 LOC728229   | 22 PREDICTED: Homo sapiens h    | 0.00098308 | 0.00158355 | 1.86059185 |
| ZNF227      | NM_182490.1 ZNF227      | 19 Homo sapiens zinc finger pro | 0.02781096 | 0.02726102 | 1.85969651 |
| PTPN13      | NM_080684.1 PTPN13      | 4 Homo sapiens PTP1E; PNP1;     | 0.00550073 | 0.00689772 | 1.85823057 |
| LOC132241   | XM_379215.2 LOC132241   | 3 PREDICTED: Homo sapiens h     | 0.00021511 | 0.00044536 | 1.85698249 |
| ABCG4       | NM_022169.3 ABCG4       | 11 Homo sapiens WHITE2          | 0.0002683  | 0.00053477 | 1.85644917 |
| TMEM189     | NM_199129.1 TMEM189     | 20 Homo sapiens UBE2V1; Kua     | 7.4349E-09 | 2.6198E-07 | 1.85636818 |
| TMEM50A     | NM_014313.2 TMEM50A     | 1 Homo sapiens SMP1; RP11-3     | 0.00039995 | 0.00074855 | 1.85571952 |
| PGGT1B      | NM_005023.2 PGGT1B      | 5 Homo sapiens BNG1; GGTI       | 0.02822398 | 0.02758267 | 1.85569477 |
| CBY1        | NM_015373.3 CBY1        | 22 Homo sapiens PGEA1; arb1;    | 3.9731E-06 | 1.8864E-05 | 1.85529675 |
| ST3GAL1     | NM_173344.1 ST3GAL1     | 8 Homo sapiens Gal-NAc6S; S     | 0.00387845 | 0.00510877 | 1.85518468 |
| SCARNA8     | NR_003009.1 SCARNA8     | 9 Homo sapiens U92              | 3.7491E-09 | 1.7685E-07 | 1.85511963 |
| PIK3C3      | NM_002647.2 PIK3C3      | 18 Homo sapiens MGC61518; V     | 6.166E-06  | 2.6123E-05 | 1.85411236 |
| ZSCAN16     | NM_025231.1 ZSCAN16     | 6 Homo sapiens ZNF392; ZNF4     | 0.03196366 | 0.03055335 | 1.85382563 |
| PMS2L4      | NR_022007.1 PMS2L4      | 7 Homo sapiens postmeiotic se   | 1.46E-06   | 8.8711E-06 | 1.85249283 |
| SMAD2       | XM_930034.1 SMAD2       | 18 Homo sapiens hMAD-2; JV18    | 0.02638808 | 0.02612604 | 1.85015951 |
| TYSND1      | NM_173555.1 TYSND1      | 10 Homo sapiens FLJ40378; MG    | 1.0574E-05 | 3.9714E-05 | 1.84762305 |
| KIAA1602    | XM_035497.1 KIAA1602    | 12 Homo sapiens FP1193          | 0.00016363 | 0.0003567  | 1.84649982 |
| AMOT        | NM_133265.2 AMOT        | Homo sapiens KIAA1071           | 0.00031279 | 0.00060838 | 1.84475136 |
| C10orf118   | NM_018017.2 C10ORF118   | 10 Homo sapiens MGC118918; I    | 0.00185236 | 0.00271193 | 1.84399161 |
| C11orf60    | NM_020153.2 C11ORF60    | 11 Homo sapiens C11orf2; FLJ2   | 0.03068064 | 0.02951666 | 1.8439846  |

## 5.0 ACL-Indepen Upreg

|           |                       |   |                                 |            |            |            |
|-----------|-----------------------|---|---------------------------------|------------|------------|------------|
| VPS16     | NM_080413.1 VPS16     |   | 20 Homo sapiens hVPS16          | 3.981E-07  | 3.4721E-06 | 1.84326547 |
| ING5      | XM_941026.1 ING5      |   | PREDICTED: Homo sapiens ir      | 0.00184905 | 0.00270799 | 1.84255119 |
| HLA-DMA   | NM_006120.2 HLA-DMA   |   | 6 Homo sapiens HLADM; RING      | 7.0309E-07 | 5.184E-06  | 1.84159315 |
| MPPPE1    | NM_023075.3 MPPPE1    |   | 18 Homo sapiens metallophosph   | 1.742E-05  | 5.9197E-05 | 1.83916146 |
| C16orf93  | NM_00101497.C16ORF93  |   | 16 Homo sapiens MGC104706       | 1.5556E-06 | 9.3359E-06 | 1.83841738 |
| WDR44     | NM_019045.3 WDR44     | X | Homo sapiens DKFZp686L20        | 0.00035259 | 0.00067252 | 1.83743875 |
| PDPK1     | NM_002613.3 PDPK1     |   | 16 Homo sapiens MGC20087; M     | 0.00035417 | 0.00067524 | 1.83383305 |
| SLC25A42  | NM_178526.1 SLC25A42  |   | 19 Homo sapiens MGC26694        | 8.3757E-06 | 3.2969E-05 | 1.83383056 |
| POLR2L    | NM_021128.3 POLR2L    |   | 11 Homo sapiens hsRPB10b; RP    | 8.3458E-07 | 5.8581E-06 | 1.83296339 |
| GRPR      | NM_005314.2 GRPR      | X | Homo sapiens gastrin-releasi    | 0.00315506 | 0.00426935 | 1.83280042 |
| RHBDL3    | NM_138328.2 RHBDL3    |   | 17 Homo sapiens RHBDL4; FLJ4    | 2.6019E-06 | 1.3695E-05 | 1.83187026 |
| HSPA12A   | XM_945467.1 HSPA12A   |   | PREDICTED: Homo sapiens h       | 4.866E-06  | 2.1985E-05 | 1.82952226 |
| TSPAN33   | NM_178562.2 TSPAN33   |   | 7 Homo sapiens MGC50844; Pf     | 1.8219E-05 | 6.1317E-05 | 1.82912491 |
| CDKN1C    | NM_000076.1 CDKN1C    |   | 11 Homo sapiens BWCR; p57; B    | 0.00051743 | 0.00092594 | 1.82845034 |
| PEX6      | NM_000287.2 PEX6      |   | 6 Homo sapiens PAF-2; PAF2; I   | 4.7997E-06 | 2.1752E-05 | 1.82775548 |
| FYCO1     | NM_024513.1 FYCO1     |   | 3 Homo sapiens FLJ13335; RU     | 6.6369E-08 | 1.0307E-06 | 1.82740029 |
| SRPK2     | NM_182692.1 SRPK2     |   | 7 Homo sapiens FLJ36101; SFF    | 0.04808423 | 0.04298432 | 1.82032075 |
| NKX3-1    | NM_006167.2 NKX3-1    |   | 8 Homo sapiens NKX3A; BAPX;     | 2.1617E-07 | 2.2851E-06 | 1.81988065 |
| LONP2     | NM_031490.2 LONP2     |   | 16 Homo sapiens LONP; MGC48     | 9.3252E-05 | 0.00022683 | 1.81919192 |
| COL7A1    | NM_000094.2 COL7A1    |   | 3 Homo sapiens EBR1; EBD1; I    | 2.2732E-05 | 7.2845E-05 | 1.81821077 |
| ADAT1     | NM_012091.2 ADAT1     |   | 16 Homo sapiens HADAT1          | 0.0004253  | 0.00078742 | 1.81784947 |
| KIAA1468  | NM_020854.2 KIAA1468  |   | 18 Homo sapiens HsT885; HsT3    | 1.6715E-05 | 5.7378E-05 | 1.81564295 |
| WWTR1     | NM_015472.3 WWTR1     |   | 3 Homo sapiens TAZ; DKFZP58     | 0.00915444 | 0.01066256 | 1.81358029 |
| NBPF14    | NM_015383.1 NBPF14    |   | 1 Homo sapiens RP3-328E19.1     | 0.00084721 | 0.00139594 | 1.81341729 |
| CITED2    | NM_006079.3 CITED2    |   | 6 Homo sapiens P35SRJ; MRG1     | 4.6712E-09 | 1.9333E-07 | 1.81330859 |
| IRS2      | NM_003749.2 IRS2      |   | 13 Homo sapiens insulin receptc | 3.2097E-05 | 9.5237E-05 | 1.81051938 |
|           | Hs.130036 HS.130036   |   | 14 Homo sapiens cDNA FLJ4230    | 3.0039E-06 | 1.5208E-05 | 1.80686783 |
| RBBP5     | NM_005057.2 RBBP5     |   | 1 Homo sapiens RBQ3; SWD1       | 0.00011547 | 0.00026867 | 1.80503794 |
| PINX1     | NM_017884.3 PINX1     |   | 8 Homo sapiens LPTS; MGC88:     | 0.00043493 | 0.00080187 | 1.80430455 |
| RABL4     | NM_006860.2 RABL4     |   | 22 Homo sapiens RAYL            | 3.2282E-06 | 1.603E-05  | 1.80016085 |
| ZNF473    | NM_015428.1 ZNF473    |   | 19 Homo sapiens HZFP100; ZN4    | 0.00030841 | 0.0006016  | 1.79877026 |
| SPTY2D1   | NM_194285.2 SPTY2D1   |   | 11 Homo sapiens DKFZp686I06f    | 0.00357122 | 0.00474899 | 1.79813009 |
| C2orf56   | NM_144736.3 C2ORF56   |   | 2 Homo sapiens RP1853           | 1.113E-07  | 1.5E-06    | 1.79573934 |
| TRAK1     | NM_014965.2 TRAK1     |   | 3 Homo sapiens OIP106           | 0.00432905 | 0.0056014  | 1.79534371 |
| NPEPL1    | NM_024663.3 NPEPL1    |   | 20 Homo sapiens FLJ42065; FLJ   | 1.4988E-06 | 9.0503E-06 | 1.79291626 |
|           | Hs.284464 HS.284464   |   | 10 AGENCOURT_6795541 NIH_I      | 0.05688184 | 0.04942378 | 1.79272109 |
| TMEM120A  | NM_031925.1 TMEM120A  |   | 7 Homo sapiens TMPIT            | 5.6872E-07 | 4.4793E-06 | 1.7917124  |
| GLB1L2    | NM_138342.2 GLB1L2    |   | 11 Homo sapiens MST114; MSTI    | 4.5058E-06 | 2.0731E-05 | 1.79143892 |
| DKK1      | NM_012242.2 DKK1      |   | 10 Homo sapiens DKK-1; SK       | 7.8505E-10 | 8.5037E-08 | 1.79086108 |
| RNF216L   | NR_023385.1 RNF216L   |   | 7 Homo sapiens ring finger pro  | 0.00019331 | 0.00040959 | 1.7902738  |
| SNORA7B   | XM_930024.1 SNORA7B   |   | 3 Homo sapiens ACA7B            | 0.00145475 | 0.00221174 | 1.79011846 |
| SKAP2     | NM_003930.3 SKAP2     |   | 7 Homo sapiens RA70; SCAP2;     | 1.3403E-06 | 8.3227E-06 | 1.79010627 |
| LOC643035 | XM_931999.1 LOC643035 |   | 1 PREDICTED: Homo sapiens s     | 5.3149E-05 | 0.0001434  | 1.78819149 |
| RBM43     | NM_198557.2 RBM43     |   | 2 Homo sapiens RNA binding r    | 0.01683064 | 0.01781758 | 1.78751518 |
| CNFN      | NM_032488.2 CNFN      |   | 19 Homo sapiens PLAC8L2         | 4.3732E-06 | 2.0302E-05 | 1.78674912 |
| LOC729495 | XR_015564.1 LOC729495 |   | 22 PREDICTED: Homo sapiens s    | 1.3881E-06 | 8.5648E-06 | 1.78399233 |
| ARRDC3    | NM_020801.1 ARRDC3    |   | 5 Homo sapiens TLIMP; KIAA1.    | 0.01576415 | 0.01682251 | 1.78375358 |
| LRRC6     | NM_012472.3 LRRC6     |   | 8 Homo sapiens LRTP; TSLRP      | 0.00110437 | 0.00174999 | 1.78307246 |
| PSMA2     | NM_002787.3 PSMA2     |   | 7 Homo sapiens HC3; MU; PSC     | 1.7315E-07 | 1.9705E-06 | 1.78236449 |
| ACSL1     | NM_001995.2 ACSL1     |   | 4 Homo sapiens FAFL2; LACS;     | 3.5598E-05 | 0.00010415 | 1.78152158 |
| LOC401677 | XM_497272.2 LOC401677 |   | PREDICTED: Homo sapiens s       | 0.03967443 | 0.03659239 | 1.7794714  |
| BAMBI     | NM_012342.2 BAMBI     |   | 10 Homo sapiens NMA             | 8.78E-10   | 8.5595E-08 | 1.77927977 |
| CD163L1   | NM_174941.4 CD163L1   |   | 12 Homo sapiens M160; CD163f    | 3.9534E-06 | 1.878E-05  | 1.77794899 |
| WIPI1     | NM_017983.3 WIPI1     |   | Homo sapiens WIPI49; FLJ1f      | 1.3485E-06 | 8.3555E-06 | 1.77702505 |
| CENPT     | NM_025082.3 CENPT     |   | 16 Homo sapiens FLJ13111; CEI   | 3.688E-06  | 1.777E-05  | 1.77700872 |
| CBR4      | NM_032783.3 CBR4      |   | 4 Homo sapiens FLJ14431         | 5.5128E-06 | 2.3981E-05 | 1.77642579 |
| FAM54B    | NM_019557.5 FAM54B    |   | 1 Homo sapiens HYST1888; M      | 0.00156071 | 0.0023428  | 1.77565382 |
| SEC22A    | NM_012430.2 SEC22A    |   | 3 Homo sapiens SEC22L2          | 1.1403E-06 | 7.3786E-06 | 1.77355929 |
| APBB3     | NM_006051.2 APBB3     |   | 5 Homo sapiens MGC87674; SI     | 2.6146E-09 | 1.4338E-07 | 1.77308337 |
| ALAS1     | NM_000688.4 ALAS1     |   | 3 Homo sapiens MIG4; ALAS3;     | 0.00585141 | 0.00727509 | 1.77295741 |
| DIP2A     | NM_206889.1 DIP2A     |   | 21 Homo sapiens DIP2; C21orf1   | 0.00032009 | 0.00062052 | 1.77257362 |
| PTPRU     | NM_005704.3 PTPRU     |   | 1 Homo sapiens GLEPP1; hPTP     | 8.721E-05  | 0.00021476 | 1.77092028 |
| DNM2      | NM_004945.2 DNM2      |   | 19 Homo sapiens CMTDI1; CMTI    | 1.3552E-05 | 4.8336E-05 | 1.77084057 |
| GAA       | NM_000152.2 GAA       |   | 17 Homo sapiens LYAG            | 1.8828E-05 | 6.3003E-05 | 1.77061504 |
| LOC646786 | XM_929738.1 LOC646786 |   | 6 PREDICTED: Homo sapiens s     | 0.00019734 | 0.00041521 | 1.76952311 |
| TLE6      | NM_024760.1 TLE6      |   | 19 Homo sapiens FLJ14009; MG    | 0.00047684 | 0.00086585 | 1.76947335 |
| C7orf20   | XM_946081.1 C7ORF20   |   | PREDICTED: Homo sapiens c       | 0.00429521 | 0.00556583 | 1.76874342 |
| FBXO4     | NM_012176.2 FBXO4     |   | 5 Homo sapiens FLJ10141; DK     | 0.04288404 | 0.0390316  | 1.76836537 |
| MAP1LC3B  | NM_022818.3 MAP1LC3B  |   | 16 Homo sapiens MAP1A/1BLC3     | 1.6636E-09 | 1.1584E-07 | 1.7671998  |
| AK1       | NM_000476.1 AK1       |   | 9 Homo sapiens adenylate kina   | 3.2025E-06 | 1.5947E-05 | 1.76539663 |

## 5.0 ACL-Indepen Upreg

|             |                          |   |                                |            |            |            |
|-------------|--------------------------|---|--------------------------------|------------|------------|------------|
| CDK5        | NM_004935.2 CDK5         |   | 7 Homo sapiens PSSALRE         | 5.54E-08   | 9.1026E-07 | 1.76212432 |
| MT2A        | NM_005953.2 MT2A         |   | 16 Homo sapiens MT2            | 8.1619E-08 | 1.1856E-06 | 1.7616702  |
| CSAG3B      | NM_00108084 CSAG3B       |   | Homo sapiens CSAG2             | 6.3147E-05 | 0.00016411 | 1.76140568 |
| RFX6        | NM_173560.1 RFX6         |   | 6 Homo sapiens dJ955L16.1; M   | 0.05733242 | 0.04972664 | 1.76047476 |
| RCOR2       | NM_173587.2 RCOR2        |   | 11 Homo sapiens REST corepres  | 8.7452E-05 | 0.00021529 | 1.75894538 |
| NRBF2       | NM_030759.3 NRBF2        |   | 10 Homo sapiens COPR2; COPR    | 2.9596E-05 | 8.9113E-05 | 1.75768456 |
| SNRK        | NM_017719.3 SNRK         |   | 3 Homo sapiens HSNFRK; DKF     | 4.512E-07  | 3.8066E-06 | 1.75766561 |
| FAM190B     | NM_018999.2 FAM190B      |   | 10 Homo sapiens FLJ14262; Gc   | 1.0433E-05 | 3.9304E-05 | 1.75680401 |
| C3orf39     | NM_032806.4 C3ORF39      |   | 3 Homo sapiens AGO61; FLJ14    | 2.2516E-06 | 1.224E-05  | 1.7539765  |
| PLSCR4      | NM_020353.1 PLSCR4       |   | 3 Homo sapiens phospholipid s  | 7.6761E-05 | 0.00019303 | 1.75350983 |
| RABAC1      | NM_006423.1 RABAC1       |   | 19 Homo sapiens PRAF1; PRA1;   | 2.5924E-06 | 1.3669E-05 | 1.75350636 |
| CHD2        | NM_001271.1 CHD2         |   | 15 Homo sapiens DKFZp781D17    | 0.01171971 | 0.01312429 | 1.75336855 |
| KDM5B       | NM_006618.3 KDM5B        |   | 1 Homo sapiens FLJ23670; FLJ   | 1.0092E-06 | 6.7644E-06 | 1.75207346 |
| CBLB        | NM_170662.3 CBLB         |   | 3 Homo sapiens DKFZp779F14     | 0.00031194 | 0.00060701 | 1.75172749 |
| WFS1        | NM_006005.2 WFS1         |   | 4 Homo sapiens DFNA14; DID     | 2.5068E-09 | 1.447E-07  | 1.75139191 |
| ARL3        | NM_004311.2 ARL3         |   | 10 Homo sapiens ARFL3          | 1.5586E-05 | 5.418E-05  | 1.75089516 |
| PLEKHB2     | NM_017958.1 PLEKHB2      |   | 2 Homo sapiens EVT2; FLJ207    | 6.9881E-06 | 2.8745E-05 | 1.74973288 |
| NAGK        | NM_017567.2 NAGK         |   | 2 Homo sapiens GNK; HSA242'    | 3.6059E-08 | 6.9687E-07 | 1.74770444 |
| IFI6        | NM_002038.2 IFI6         |   | 1 Homo sapiens IFI-6-16; 6-1   | 6.2761E-09 | 2.3634E-07 | 1.74622456 |
| PHTF1       | NM_006608.1 PHTF1        |   | 1 Homo sapiens PHTF            | 7.3311E-06 | 2.9724E-05 | 1.74521198 |
| LOC10013151 | XM_00172289 LOC100131512 |   | PREDICTED: Homo sapiens h      | 0.01578152 | 0.01683695 | 1.7449691  |
| LOC10012974 | XM_00171556 LOC100129744 |   | PREDICTED: Homo sapiens h      | 0.02355884 | 0.02374558 | 1.74485975 |
| RAPGEF2     | NM_014247.2 RAPGEF2      |   | 4 Homo sapiens RA-GEF; PDZC    | 8.1518E-07 | 5.7821E-06 | 1.74270781 |
| TPMT        | NM_000367.2 TPMT         |   | 6 Homo sapiens thiopurine S-n  | 1.0363E-06 | 6.8781E-06 | 1.73840204 |
| LQK1        | XR_041452.1 LQK1         |   | 1 PREDICTED: Homo sapiens n    | 6.8583E-05 | 0.00017585 | 1.73771054 |
| GCA         | NM_012198.2 GCA          |   | 2 Homo sapiens GCL             | 1.5734E-07 | 1.8631E-06 | 1.73519756 |
| TUBG2       | NM_016437.1 TUBG2        |   | 17 Homo sapiens MGC131994      | 1.3187E-06 | 8.2116E-06 | 1.73500735 |
| ATG2A       | NM_015104.1 ATG2A        |   | 11 Homo sapiens MGC117153; I   | 2.2314E-05 | 7.1741E-05 | 1.73309636 |
| PRRG1       | NM_000950.1 PRRG1        | X | Homo sapiens PRGP1             | 3.271E-05  | 9.673E-05  | 1.73266648 |
| SDCCAG8     | NM_006642.1 SDCCAG8      |   | 1 Homo sapiens HSPC085; NY-    | 0.02764374 | 0.02711832 | 1.73215778 |
| CGNL1       | NM_032866.3 CGNL1        |   | 15 Homo sapiens MGC138254; ;   | 7.2869E-06 | 2.9559E-05 | 1.73157396 |
| HDLBP       | NM_005336.2 HDLBP        |   | 2 Homo sapiens HBP; VGL; FLJ   | 0.00834906 | 0.0098487  | 1.73148745 |
| ZBTB46      | NM_025224.2 ZBTB46       |   | 20 Homo sapiens BTBD4; ZNF3    | 2.211E-05  | 7.1165E-05 | 1.7308049  |
| DHDH        | NM_014475.2 DHDH         |   | 19 Homo sapiens HUM2DD         | 1.1307E-05 | 4.1929E-05 | 1.72958986 |
| TXNDC3      | NM_016616.2 TXNDC3       |   | 7 Homo sapiens SPTRX2; CILD    | 0.02305193 | 0.02330963 | 1.72908223 |
| TRAPPC9     | NM_031466.3 TRAPPC9      |   | 8 Homo sapiens IBP; KIAA188    | 5.1935E-05 | 0.0001409  | 1.72863442 |
| TGOLN2      | NM_006464.2 TGOLN2       |   | 2 Homo sapiens TGN51; MGC1     | 7.4038E-07 | 5.3687E-06 | 1.7247806  |
| ARFIP1      | NM_00102559 ARFIP1       |   | 4 Homo sapiens MGC117369; I    | 3.3281E-05 | 9.812E-05  | 1.72443595 |
| ATE1        | NM_007041.2 ATE1         |   | 10 Homo sapiens MGC26724       | 0.00102632 | 0.00164383 | 1.72252589 |
| TP53INP1    | NM_033285.2 TP53INP1     |   | 8 Homo sapiens TP53INP1A; T    | 3.4217E-07 | 3.1338E-06 | 1.72186288 |
| GPS2        | NM_004489.4 GPS2         |   | 17 Homo sapiens MGC104294; I   | 1.2399E-07 | 1.5882E-06 | 1.71952421 |
| TNFAIP1     | NM_021137.3 TNFAIP1      |   | 17 Homo sapiens EDP1; B61; B   | 3.037E-07  | 2.909E-06  | 1.71826797 |
| C7orf70     | XM_935791.1 C7ORF70      |   | 7 Homo sapiens chromosome 7    | 2.339E-07  | 2.3975E-06 | 1.71656259 |
| STX12       | NM_177424.1 STX12        |   | 1 Homo sapiens STX14; MGC5     | 1.0367E-05 | 3.9155E-05 | 1.71602211 |
| DDIT4L      | NM_145244.2 DDIT4L       |   | 4 Homo sapiens Rtp801L; RED    | 8.0105E-08 | 1.1734E-06 | 1.71546872 |
| BCL6        | NM_001706.2 BCL6         |   | 3 Homo sapiens ZBTB27; ZNF     | 8.0707E-06 | 3.2143E-05 | 1.71428847 |
| FAM108A2    | XM_00172466 FAM108A2     |   | PREDICTED: Homo sapiens fi     | 4.7485E-06 | 2.1542E-05 | 1.71321465 |
| AP1B1       | NM_145730.1 AP1B1        |   | 22 Homo sapiens CLAPB2; ADTE   | 4.7697E-07 | 3.9444E-06 | 1.71319569 |
| ARFGAP1     | NM_175609.1 ARFGAP1      |   | 20 Homo sapiens ARF1GAP; HRJ   | 1.0552E-05 | 3.9651E-05 | 1.71300012 |
| LOC220686   | NM_199283.4 LOC220686    |   | 22 Homo sapiens hypothetical p | 6.8653E-05 | 0.00017597 | 1.71282516 |
| GLCE        | NM_015554.1 GLCE         |   | 15 Homo sapiens KIAA0836; HS   | 2.0892E-08 | 5.036E-07  | 1.71131661 |
| KISS1R      | NM_032551.3 KISS1R       |   | 19 Homo sapiens HOT7T175; A)   | 0.00102832 | 0.00164614 | 1.70849566 |
| CXADR       | NM_001338.3 CXADR        |   | 21 Homo sapiens CAR; HCAR      | 4.6199E-08 | 8.0586E-07 | 1.70589748 |
| ZNF419      | NM_024691.2 ZNF419       |   | 19 Homo sapiens ZNF419A; FLJ   | 0.00031939 | 0.00061931 | 1.70493372 |
| F8A1        | NM_012151.3 F8A1         | X | Homo sapiens DXS522E; HAI      | 0.02580218 | 0.02560954 | 1.70146198 |
| SUV420H1    | NM_016028.4 SUV420H1     |   | 11 Homo sapiens MGC21161; M    | 0.00085807 | 0.00141171 | 1.70099274 |
| TMEM188     | NM_153261.3 TMEM188      |   | 16 Homo sapiens C16orf69; FLJ  | 2.493E-06  | 1.3241E-05 | 1.70021496 |
| LASS4       | NM_024552.1 LASS4        |   | 19 Homo sapiens FLJ12089; Trh  | 0.01921245 | 0.01991376 | 1.69973678 |
| POLG2       | NM_007215.2 POLG2        |   | 17 Homo sapiens POLB; MTPOLF   | 6.1046E-06 | 2.595E-05  | 1.69920128 |
| RAB4B       | NM_016154.2 RAB4B        |   | Homo sapiens MGC52123          | 0.02370701 | 0.02387025 | 1.69845971 |
| LOC10012920 | XM_00171891 LOC100129203 |   | PREDICTED: Homo sapiens s      | 0.04226526 | 0.03857243 | 1.6978906  |
|             | Hs.19339 HS.19339        |   | 3 Homo sapiens cDNA clone IM   | 4.3717E-07 | 3.724E-06  | 1.69619148 |
| MTMR14      | NM_022485.2 MTMR14       |   | 3 Homo sapiens FLJ22405; C3    | 1.789E-07  | 2.0099E-06 | 1.69538031 |
| TMEM205     | NM_198536.1 TMEM205      |   | 19 Homo sapiens UNQ501; MGC    | 3.9587E-10 | 5.887E-08  | 1.69428702 |
| CXorf40B    | NM_00101384 CXORF40B     | X | Homo sapiens chromosome 3      | 5.1813E-06 | 2.2937E-05 | 1.6942061  |
| EPHA10      | NM_00109943 EPHA10       |   | 1 Homo sapiens MGC43817; FI    | 0.02174129 | 0.02213484 | 1.69405552 |
| HCCA2       | NM_053005.2 HCCA2        |   | 11 Homo sapiens MOB2           | 2.4774E-05 | 7.7714E-05 | 1.69268505 |
| LMBRD1      | NM_018368.2 LMBRD1       |   | 6 Homo sapiens bA810122.1; F   | 1.8379E-08 | 4.6607E-07 | 1.69127167 |
| DNAH1       | NM_015512.3 DNAH1        |   | 3 Homo sapiens HDHC7; HL11     | 0.05254217 | 0.04616976 | 1.69074983 |
| ACAD8       | NM_014384.1 ACAD8        |   | 11 Homo sapiens ACAD-8         | 1.339E-06  | 8.3206E-06 | 1.68982305 |

## 5.0 ACL-Indepen Upreg

|             |                          |   |                                |            |            |            |
|-------------|--------------------------|---|--------------------------------|------------|------------|------------|
| STRBP       | NM_018387.2 STRBP        |   | 9 Homo sapiens DKFZp434N21     | 7.8851E-05 | 0.00019722 | 1.68838554 |
| C12orf4     | NM_020374.2 C12ORF4      |   | 12 Homo sapiens FLJ23899; FLJ  | 0.02958367 | 0.02867828 | 1.68509022 |
| MORN2       | NM_194270.1 MORN2        |   | 2 Homo sapiens MGC126131; I    | 8.307E-06  | 3.2743E-05 | 1.68406709 |
| LOC730820   | NM_030759.1 LOC730820    |   | PREDICTED: Homo sapiens s      | 9.8448E-07 | 6.6496E-06 | 1.68216913 |
| GALNT3      | NM_004482.2 GALNT3       |   | 2 Homo sapiens DKFZp686C10     | 0.04282808 | 0.03898875 | 1.68180376 |
| MOSPD1      | NM_019556.1 MOSPD1       | X | Homo sapiens DJ473B4           | 1.6577E-05 | 5.7016E-05 | 1.68150457 |
| LGMN        | NM_005606.5 LGMN         |   | 14 Homo sapiens AEP; LGMN1; I  | 5.8351E-08 | 9.4634E-07 | 1.68138011 |
| KLRAQ1      | NM_00113562 KLRAQ1       |   | 2 Homo sapiens KLRAQ motif c   | 0.00061236 | 0.00106394 | 1.68082341 |
| BCOR        | NM_017745.4 BCOR         | X | Homo sapiens MGC131961; I      | 2.8743E-06 | 1.474E-05  | 1.68066402 |
| SERINC3     | NM_198941.1 SERINC3      |   | 20 Homo sapiens TMS-1; TDE; S  | 1.4563E-05 | 5.1397E-05 | 1.68061869 |
| CLYBL       | NM_138280.3 CLYBL        |   | 13 Homo sapiens bA134015.1; I  | 2.5148E-07 | 2.5275E-06 | 1.68016759 |
| PVRL2       | NM_00104272 PVRL2        |   | 19 Homo sapiens PVRR2; HVEB;   | 3.5319E-06 | 1.7235E-05 | 1.67983112 |
| LOC651991   | XM_945086.1 LOC651991    |   | PREDICTED: Homo sapiens h      | 0.03764863 | 0.03504446 | 1.67953358 |
| GRAMD4      | NM_015124.2 GRAMD4       |   | 22 Homo sapiens KIAA0767; MC   | 0.00069814 | 0.00118528 | 1.67947904 |
| LOC644988   | XR_017586.2 LOC644988    |   | 17 PREDICTED: Homo sapiens n   | 7.3024E-07 | 5.3215E-06 | 1.67784074 |
| LOC143666   | NM_002020.1 LOC143666    |   | 11 PREDICTED: Homo sapiens h   | 8.0711E-06 | 3.2131E-05 | 1.67704817 |
| TMEM208     | NM_014187.3 TMEM208      |   | 16 Homo sapiens HSPC171        | 5.275E-06  | 2.3223E-05 | 1.67356018 |
| LOC730060   | XM_00112617 LOC730060    |   | PREDICTED: Homo sapiens h      | 0.01698261 | 0.01795679 | 1.67273516 |
| NME7        | NM_013330.3 NME7         |   | 1 Homo sapiens nm23-H7; FLJ    | 1.9335E-07 | 2.1074E-06 | 1.67192444 |
| IFT52       | NM_016004.2 IFT52        |   | 20 Homo sapiens NGD5; CGI-53   | 0.00017964 | 0.00038424 | 1.67180685 |
| BTBD10      | NM_032320.4 BTBD10       |   | 11 Homo sapiens MGC13007; G    | 1.7342E-07 | 1.9685E-06 | 1.67165079 |
| LCAP        | XM_927025.1 LCAP         | X | Homo sapiens lung carcinom.    | 0.01144291 | 0.01286356 | 1.67145399 |
| SAMD4B      | NM_018028.2 SAMD4B       |   | 19 Homo sapiens FLJ10211; SM   | 0.00036373 | 0.00069018 | 1.67140111 |
| OXSM        | NM_017897.1 OXSM         |   | 3 Homo sapiens FLJ20604; FA5   | 1.9815E-06 | 1.1159E-05 | 1.67134257 |
| GBF1        | NM_004193.1 GBF1         |   | 10 Homo sapiens KIAA0248; MC   | 0.00022041 | 0.00045417 | 1.67114018 |
| CXorf57     | NM_018015.3 CXORF57      | X | Homo sapiens RP11-647M7.1      | 4.8798E-06 | 2.2024E-05 | 1.6678353  |
| CYTH3       | NM_004227.3 CYTH3        |   | 7 Homo sapiens GRP1; ARNO3     | 0.00068955 | 0.00117295 | 1.66765841 |
| TSPAN31     | NM_005981.3 TSPAN31      |   | 12 Homo sapiens SAS            | 0.00075842 | 0.00127309 | 1.66598476 |
| ZNF35       | NM_003420.2 ZNF35        |   | 3 Homo sapiens Zfp105; HF.10   | 0.00043849 | 0.00080623 | 1.66535985 |
|             | Hs.363526 HS.363526      |   | 8 Homo sapiens cDNA clone IM   | 1.3396E-07 | 1.6695E-06 | 1.66412686 |
| MORC2       | NM_014941.1 MORC2        |   | 22 Homo sapiens ZCW3; ZCWC     | 7.9861E-06 | 3.1835E-05 | 1.66183114 |
| CCDC128     | NM_152994.2 CCDC128      |   | 2 Homo sapiens MGC111781; I    | 3.728E-06  | 1.7913E-05 | 1.66181457 |
| ELOVL7      | NM_024930.1 ELOVL7       |   | 5 Homo sapiens FLJ23563        | 0.00517975 | 0.00654292 | 1.66149501 |
| SORT1       | NM_002959.4 SORT1        |   | 1 Homo sapiens NT3; Gp95       | 2.3877E-07 | 2.4388E-06 | 1.65914486 |
| CEP68       | NM_015147.1 CEP68        |   | 2 Homo sapiens FLJ25920; KIA   | 0.00545516 | 0.00684547 | 1.65766875 |
| THBS3       | NM_007112.3 THBS3        |   | 1 Homo sapiens MGC119564; I    | 0.02915862 | 0.02831943 | 1.65683062 |
| C2orf64     | NM_00100821 C2ORF64      |   | 2 Homo sapiens G330578E17R     | 1.4376E-06 | 8.7779E-06 | 1.65564639 |
| LOC730389   | XM_00172641 LOC730389    |   | 7 PREDICTED: Homo sapiens h    | 0.03172151 | 0.03036819 | 1.65520003 |
| PIGH        | NM_004569.2 PIGH         |   | 14 Homo sapiens GPI-H          | 2.3205E-06 | 1.2529E-05 | 1.65484391 |
| CCBL2       | NM_00100866 CCBL2        |   | 1 Homo sapiens DKFZp547N11     | 0.0210741  | 0.02155813 | 1.65411757 |
| AZ11        | NM_014984.1 AZ11         |   | 17 Homo sapiens AZ1; Cep131    | 6.5957E-07 | 4.9675E-06 | 1.6535942  |
| FER         | NM_005246.1 FER          |   | 5 Homo sapiens TYK3            | 1.9344E-06 | 1.0971E-05 | 1.65218036 |
| LOC10013093 | XM_00172701 LOC100130935 |   | PREDICTED: Homo sapiens s      | 0.04571918 | 0.0412229  | 1.65092293 |
| STIM2       | NM_020860.2 STIM2        |   | 4 Homo sapiens KIAA1482; FL    | 0.00041009 | 0.00076459 | 1.65067659 |
| IGSF3       | NM_001542.2 IGSF3        |   | 1 Homo sapiens V8; EWI-3; MC   | 1.669E-08  | 4.3454E-07 | 1.65008264 |
| PBX3        | NM_006195.4 PBX3         |   | 9 Homo sapiens pre-B-cell leuk | 7.2406E-06 | 2.9439E-05 | 1.64990456 |
| PEX16       | NM_004813.1 PEX16        |   | 11 Homo sapiens peroxisomal b  | 2.3187E-05 | 7.3954E-05 | 1.64848162 |
| FAM176A     | NM_00113503 FAM176A      |   | 2 Homo sapiens family with se  | 0.00101867 | 0.00163366 | 1.64830967 |
| EXT2        | NM_000401.2 EXT2         |   | 11 Homo sapiens SOTV           | 1.8092E-06 | 1.0437E-05 | 1.64805308 |
| BIK         | NM_001197.3 BIK          |   | 22 Homo sapiens NBK; BIP1; BF  | 4.2091E-07 | 3.6277E-06 | 1.64745539 |
| PRAF2       | NM_007213.1 PRAF2        | X | Homo sapiens JM4               | 1.6988E-06 | 9.9769E-06 | 1.64577359 |
| LOC653051   | XM_925795.1 LOC653051    |   | 17 PREDICTED: Homo sapiens s   | 0.05371356 | 0.04709531 | 1.64554096 |
| ANKDD1A     | NM_182703.2 ANKDD1A      |   | 15 Homo sapiens MGC120306; I   | 5.8723E-07 | 4.5637E-06 | 1.64540226 |
| KIAA0562    | NM_014704.2 KIAA0562     |   | 1 Homo sapiens RP1-286D6.4;    | 0.00446507 | 0.00575279 | 1.64520881 |
| TTPAL       | NM_024331.2 TTPAL        |   | 20 Homo sapiens DKFZp686E08    | 1.2165E-05 | 4.4565E-05 | 1.64445791 |
| SENP5       | NM_152699.4 SENP5        |   | 3 Homo sapiens MGC27076; D     | 1.4319E-06 | 8.7489E-06 | 1.64294109 |
| PARD3       | NM_019619.2 PARD3        |   | 10 Homo sapiens SE2-5T2; PAR   | 0.03014582 | 0.02913631 | 1.64256048 |
| SERINC1     | NM_020755.2 SERINC1      |   | 6 Homo sapiens TDE2; KIAA12    | 0.00040455 | 0.00075553 | 1.64195078 |
| LOC729101   | NM_144981.1 LOC729101    |   | 11 PREDICTED: Homo sapiens n   | 0.00014199 | 0.00031758 | 1.64122419 |
| MARK3       | NM_002376.4 MARK3        |   | 14 Homo sapiens CTAK1; KP78;   | 0.00020983 | 0.00043658 | 1.64090772 |
| GJB5        | NM_005268.2 GJB5         |   | 1 Homo sapiens CX31.1          | 0.00155761 | 0.00233975 | 1.6407928  |
| BET1        | NM_005868.3 BET1         |   | 7 Homo sapiens HBET1; DKFZf    | 0.00365844 | 0.00484955 | 1.63990626 |
| RIC8B       | NM_018157.1 RIC8B        |   | 12 Homo sapiens hSyn; FLJ106   | 4.272E-05  | 0.00012006 | 1.63875336 |
| GBA2        | XM_944300.1 GBA2         |   | 9 Homo sapiens AD035; KIAA1    | 0.00496881 | 0.00631465 | 1.63855474 |
| ATP6V0D1    | NM_004691.3 ATP6V0D1     |   | 16 Homo sapiens VPATPD; ATP6   | 1.2779E-06 | 8.0142E-06 | 1.63766508 |
| GPAM        | NM_020918.2 GPAM         |   | 10 Homo sapiens GPAT1; MGC2    | 7.4563E-07 | 5.3978E-06 | 1.63676158 |
| SYN2        | NM_003178.3 SYN2         |   | 3 Homo sapiens SYNIIa; SYNII   | 0.0017454  | 0.00257987 | 1.63584665 |
| NUS1        | NM_138459.3 NUS1         |   | 6 Homo sapiens NgBR; C6orf6    | 0.04137103 | 0.03787057 | 1.63514088 |
| CD99L2      | NM_134445.2 CD99L2       | X | Homo sapiens CD99B; DKFZf      | 7.2673E-06 | 2.9506E-05 | 1.63495829 |
| MGC72104    | NM_207350.1 MGC72104     |   | 20 Homo sapiens similar to FRG | 3.0051E-06 | 1.5206E-05 | 1.63367463 |

## 5.0 ACL-Indepen Upreg

|           |                         |                               |            |            |            |
|-----------|-------------------------|-------------------------------|------------|------------|------------|
| ACPL2     | NM_152282.2 ACPL2       | 3 Homo sapiens FLJ23751       | 2.576E-06  | 1.3616E-05 | 1.63233727 |
|           | Hs.107418 HS.107418     | 5 Homo sapiens cDNA FLJ4185   | 6.0842E-05 | 0.00015959 | 1.63160384 |
| FOXD2     | NM_004474.2 FOXD2       | 1 Homo sapiens FREAC-9; FKX   | 7.1052E-05 | 0.00018107 | 1.63082651 |
| STK11IP   | NM_052902.1 STK11IP     | 2 Homo sapiens STK11IP1; KIA  | 0.00179519 | 0.00264412 | 1.62900504 |
| RHOB      | NM_004040.2 RHOB        | 2 Homo sapiens ARH6; MST08    | 1.8125E-10 | 3.8788E-08 | 1.62888638 |
| ENPP4     | NM_014936.3 ENPP4       | 6 Homo sapiens KIAA0879; NP   | 0.00011528 | 0.00026829 | 1.62634285 |
| GDPD1     | NM_182569.1 GDPD1       | 17 Homo sapiens FLJ27503; UG  | 0.0019273  | 0.00280665 | 1.62626022 |
| MTE       | NM_175621.2 MTE         | Homo sapiens MT1I             | 2.6885E-11 | 1.2415E-08 | 1.62510119 |
| C8orf47   | NM_173549.1 C8ORF47     | 8 Homo sapiens FLJ39553       | 0.00293021 | 0.00400213 | 1.62488449 |
| KBTBD11   | NM_014867.1 KBTBD11     | 8 Homo sapiens KIAA0711; KL   | 2.2266E-07 | 2.323E-06  | 1.62463314 |
| BTBD12    | NM_032444.2 BTBD12      | 16 Homo sapiens KIAA1987; KI  | 0.00065213 | 0.00112017 | 1.62432657 |
| B4GALNT4  | NM_178537.3 B4GALNT4    | 11 Homo sapiens Beta4GalNAc-7 | 0.0078479  | 0.00932775 | 1.62363448 |
| MST1      | NM_020998.2 MST1        | 3 Homo sapiens HGFL; NF15S2   | 2.2949E-06 | 1.2422E-05 | 1.62282008 |
| MGC39900  | XM_936687.1 MGC39900    | PREDICTED: Homo sapiens h     | 2.6085E-05 | 8.0816E-05 | 1.62251444 |
| SELM      | NM_080430.2 SELM        | 22 Homo sapiens MGC40146; SI  | 1.0701E-06 | 7.0544E-06 | 1.62234266 |
| APITD1    | NM_198544.2 APITD1      | 1 Homo sapiens MGC32686; Cl   | 2.2634E-05 | 7.261E-05  | 1.62228548 |
| ANKRD49   | NM_017704.2 ANKRD49     | 11 Homo sapiens FGIF; FLJ2018 | 0.00635426 | 0.0078008  | 1.6214496  |
| SLC9A1    | NM_003047.2 SLC9A1      | 1 Homo sapiens APNH; FLJ422   | 1.3131E-05 | 4.7217E-05 | 1.62089219 |
| LOC730993 | XR_038168.1 LOC730993   | PREDICTED: Homo sapiens n     | 0.00510393 | 0.00646483 | 1.62051588 |
| GFI1      | NM_005263.2 GFI1        | 1 Homo sapiens ZNF163         | 0.00443354 | 0.00571469 | 1.61947818 |
| PLEKHG4   | NM_015432.2 PLEKHG4     | 16 Homo sapiens puratrophin1; | 2.5121E-05 | 7.8521E-05 | 1.61768816 |
|           | Hs.572219 HS.572219     | CM3-MT0357-260101-690-b:      | 6.3031E-06 | 2.6575E-05 | 1.61705152 |
| QSOX1     | NM_002826.4 QSOX1       | 1 Homo sapiens QSCN6; FLJ34   | 6.6257E-07 | 4.9644E-06 | 1.61669845 |
| C14orf82  | XM_944991.1 C14ORF82    | PREDICTED: Homo sapiens c     | 0.01818757 | 0.01899961 | 1.61305458 |
| LOC653583 | XM_928224.1 LOC653583   | 19 PREDICTED: Homo sapiens s  | 0.03533339 | 0.03322422 | 1.61195438 |
| PDLIM3    | NM_014476.1 PDLIM3      | 4 Homo sapiens DKFZp686L03    | 5.242E-05  | 0.00014196 | 1.61166313 |
| SLC25A29  | NM_00103935 SLC25A29    | 14 Homo sapiens CACL; C14orff | 0.00843353 | 0.00993232 | 1.61125507 |
| SMYD3     | NM_022743.1 SMYD3       | 1 Homo sapiens BA74P14.1; ZI  | 4.0034E-08 | 7.442E-07  | 1.61071227 |
| CRIPAK    | NM_175918.2 CRIPAK      | 4 Homo sapiens FLJ34443       | 2.0733E-05 | 6.7927E-05 | 1.60865013 |
| TMEM184B  | NM_012264.3 TMEM184B    | 22 Homo sapiens DKFZp686N11   | 2.0786E-06 | 1.1565E-05 | 1.60796779 |
| RHBDD1    | NM_032276.2 RHBDD1      | 2 Homo sapiens DKFZp547E05    | 0.00012786 | 0.00029206 | 1.60781301 |
| HOXB2     | NM_002145.2 HOXB2       | 17 Homo sapiens HOPX2H; HOX2  | 0.04838235 | 0.04318042 | 1.60633378 |
| NELF      | NM_015537.3 NELF        | 9 Homo sapiens RP11-48C7.1;   | 3.1795E-08 | 6.4876E-07 | 1.60630183 |
| SLC31A1   | NM_001859.2 SLC31A1     | 9 Homo sapiens hCTR1; COPT1   | 0.00010848 | 0.00025586 | 1.60543594 |
| C3orf31   | NM_138807.2 C3ORF31     | 3 Homo sapiens MGC16471; D    | 2.737E-05  | 8.4083E-05 | 1.60288075 |
| ZSCAN21   | NM_145914.2 ZSCAN21     | 7 Homo sapiens NY-REN-21; D   | 0.0027579  | 0.00379693 | 1.60012004 |
| MXD4      | NM_006454.2 MXD4        | 4 Homo sapiens MSTP149; MAI   | 1.652E-07  | 1.9147E-06 | 1.59917585 |
| RIN3      | NM_024832.3 RIN3        | 14 Homo sapiens FLJ11700; FLJ | 0.0412589  | 0.03777581 | 1.5991062  |
| FBXL20    | NM_032875.1 FBXL20      | 17 Homo sapiens Fbl2; MGC154  | 0.02410756 | 0.02422907 | 1.59780842 |
| RIMBP3C   | NM_00112863 RIMBP3C     | 22 Homo sapiens RIMS binding  | 0.03943035 | 0.03641321 | 1.59720915 |
| POLM      | NM_013284.1 POLM        | 7 Homo sapiens Tdt-N          | 0.01005054 | 0.01151972 | 1.59703706 |
| SGSM3     | NM_015705.4 SGSM3       | 22 Homo sapiens MAP; DKFZp76  | 0.00494076 | 0.00628356 | 1.59684479 |
| CSAG3A    | NM_203311.1 CSAG3A      | Homo sapiens MGC17065         | 3.75E-05   | 0.00010834 | 1.5964903  |
| UBTD2     | NM_152277.1 UBTD2       | 5 Homo sapiens MGC30022; D    | 0.03278231 | 0.03116273 | 1.59576506 |
| AFTPH     | NM_017657.3 AFTPH       | 2 Homo sapiens MGC33965; Fl   | 2.4237E-05 | 7.6413E-05 | 1.59523006 |
| DENND5B   | NM_144973.2 DENND5B     | 12 Homo sapiens FLJ41648; DK  | 1.133E-05  | 4.1998E-05 | 1.59342737 |
| MTMR9     | NM_015458.3 MTMR9       | 8 Homo sapiens LIP-STYX; C8c  | 5.3728E-07 | 4.3051E-06 | 1.5921391  |
| NPHP3     | NM_153240.3 NPHP3       | 3 Homo sapiens FLJ30691; FLJ  | 0.00011688 | 0.00027116 | 1.59174619 |
| PRKCZ     | NM_00103358 PRKCZ       | 1 Homo sapiens PKC2           | 0.00016914 | 0.00036633 | 1.59093014 |
| SBF1      | NM_002972.1 SBF1        | 22 Homo sapiens DKFZp761D04   | 9.6076E-09 | 3.1691E-07 | 1.5907906  |
| HADHA     | NM_000182.3 HADHA       | 2 Homo sapiens LCHAD; MGC1    | 0.00128669 | 0.00199389 | 1.5905521  |
| LOC440731 | XM_933693.1 LOC440731   | 1 PREDICTED: Homo sapiens h   | 5.399E-07  | 4.3221E-06 | 1.58951367 |
| UTP14C    | NM_021645.4 UTP14C      | 13 Homo sapiens UTP14B; KIAA  | 2.7139E-06 | 1.4148E-05 | 1.58926894 |
| KIF3B     | NM_004798.2 KIF3B       | 20 Homo sapiens HH0048; KIAA  | 4.6031E-07 | 3.8501E-06 | 1.58676976 |
| FAM103A1  | NM_031452.2 FAM103A1    | 15 Homo sapiens HsT19360; C1  | 3.2227E-07 | 3.0112E-06 | 1.58286227 |
| AGGF1     | NM_018046.3 AGGF1       | 5 Homo sapiens VGSQ; FLJ102   | 4.4383E-05 | 0.00012386 | 1.58190847 |
| SKIV2L    | NM_006929.4 SKIV2L      | 6 Homo sapiens SKIV2; DDX12   | 1.4985E-05 | 5.2444E-05 | 1.58142017 |
| UBE2CBP   | NM_198920.1 UBE2CBP     | 6 Homo sapiens YJR141W; MG    | 0.01749885 | 0.01841167 | 1.58132127 |
| LRRC45    | NM_144999.2 LRRC45      | 17 Homo sapiens MGC20806      | 0.00028409 | 0.00056128 | 1.58097394 |
| IDH3G     | NM_004135.2 IDH3G       | Homo sapiens H-IDHG           | 1.6721E-06 | 9.8662E-06 | 1.57891514 |
| SCAND1    | NM_033630.1 SCAND1      | 20 Homo sapiens RAZ1; SDP1    | 5.2627E-07 | 4.2558E-06 | 1.5782445  |
|           | 39327 NM_019106.4 39327 | 22 Homo sapiens SEP3; MGC13:  | 1.2E-06    | 7.6851E-06 | 1.57680196 |
| RANBP10   | NM_020850.1 RANBP10     | 16 Homo sapiens KIAA1464; FL  | 7.0528E-05 | 0.00017989 | 1.57672236 |
| LIPA      | NM_000235.2 LIPA        | 10 Homo sapiens CESD; LAL     | 2.2985E-09 | 1.3719E-07 | 1.5765898  |
| NPC1      | NM_000271.1 NPC1        | 18 Homo sapiens NPC           | 3.555E-08  | 6.9469E-07 | 1.57575751 |
| HLA-DRB3  | NM_022555.3 HLA-DRB3    | 6 Homo sapiens MGC117330; I   | 2.3722E-05 | 7.5275E-05 | 1.57566142 |
| CCDC53    | NM_016053.1 CCDC53      | 12 Homo sapiens CGI-116       | 1.1911E-05 | 4.3763E-05 | 1.57562727 |
| RAD9A     | NM_004584.2 RAD9A       | 11 Homo sapiens RAD9          | 0.00059156 | 0.00103538 | 1.57516231 |
| ELK4      | NM_001973.2 ELK4        | 1 Homo sapiens SAP1           | 0.01779031 | 0.01864901 | 1.57375818 |
| C4orf48   | NM_00114193 C4ORF48     | 4 Homo sapiens chromosome 4   | 3.8483E-05 | 0.00011041 | 1.57322753 |

## 5.0 ACL-Indepen Upreg

|             |             |              |    |                             |            |            |            |
|-------------|-------------|--------------|----|-----------------------------|------------|------------|------------|
| C17orf95    | NM_00108051 | C17ORF95     | 17 | Homo sapiens chromosome 1   | 3.0284E-06 | 1.5271E-05 | 1.5718798  |
| SLC7A11     | NM_014331.2 | SLC7A11      | 4  | Homo sapiens CCBR1; xCT     | 0.00150232 | 0.00227108 | 1.57156856 |
| DGCR2       | NM_005137.1 | DGCR2        | 22 | Homo sapiens SEZ-12; IDD;   | 1.1816E-06 | 7.5954E-06 | 1.57059507 |
| ATP5G3      | NM_00100225 | ATP5G3       | 2  | Homo sapiens MGC125738; I   | 0.00881467 | 0.0103175  | 1.5697854  |
| C2orf42     | NM_017880.1 | C2ORF42      | 2  | Homo sapiens FLJ20558       | 4.976E-05  | 0.00013614 | 1.56799394 |
| ZNF74       | NM_003426.1 | ZNF74        | 22 | Homo sapiens Zfp520; ZNF5.  | 0.05008    | 0.04437058 | 1.56702307 |
| POR         | NM_000941.1 | POR          | 7  | Homo sapiens CPR; FLJ2646   | 6.9033E-07 | 5.1286E-06 | 1.56679893 |
| CCNO        | NM_021147.2 | CCNO         | 5  | Homo sapiens UDG2; UNG2;    | 6.8883E-09 | 2.477E-07  | 1.56675637 |
| BCORL1      | NM_021946.2 | BCORL1       | X  | Homo sapiens FLJ11362; B9   | 0.01269236 | 0.01401495 | 1.56643848 |
| GNPDA2      | NM_138335.1 | GNPDA2       | 4  | Homo sapiens SB52           | 0.00331567 | 0.00445645 | 1.56568117 |
| KLF9        | NM_001206.2 | KLF9         | 9  | Homo sapiens BTEB; BTEB1    | 1.2946E-05 | 4.6646E-05 | 1.56523193 |
| LOC645489   | XM_928514.1 | LOC645489    | 8  | PREDICTED: Homo sapiens h   | 0.00013158 | 0.00029831 | 1.56357292 |
| LOC653297   | XM_926730.1 | LOC653297    | X  | PREDICTED: Homo sapiens s   | 0.0001291  | 0.00029413 | 1.56309782 |
| KIAA0913    | NM_015037.1 | KIAA0913     | 10 | Homo sapiens FLJ34302       | 3.3785E-08 | 6.7217E-07 | 1.56302641 |
| C6orf85     | NM_021945.4 | C6ORF85      | 6  | Homo sapiens DKFZP434F01    | 1.9593E-06 | 1.1091E-05 | 1.56170291 |
| C14orf129   | NM_016472.3 | C14ORF129    | 14 | Homo sapiens HSPC210; GSI   | 5.3301E-07 | 4.2905E-06 | 1.56123764 |
| LOC10013357 | XM_00171453 | LOC100133578 | 6  | PREDICTED: Homo sapiens s   | 0.00126956 | 0.00196943 | 1.56099193 |
| TMEM30A     | NM_018247.2 | TMEM30A      | 6  | Homo sapiens FLJ10856; C6   | 3.4462E-06 | 1.693E-05  | 1.5599497  |
| ANKFY1      | NM_020740.1 | ANKFY1       | 17 | Homo sapiens KIAA1255; DK   | 0.00010527 | 0.00025017 | 1.55838146 |
| HFE         | NM_000410.3 | HFE          | 6  | Homo sapiens MGC103790; I   | 0.00125477 | 0.00195235 | 1.55687938 |
| UBL3        | NM_007106.2 | UBL3         | 13 | Homo sapiens DKFZP434K15    | 5.8644E-05 | 0.00015456 | 1.55656833 |
| SNORD83B    | NR_000028.1 | SNORD83B     | 22 | Homo sapiens U83B; RNU83I   | 0.00030467 | 0.00059589 | 1.5559892  |
| MYEOV       | NM_138768.2 | MYEOV        | 11 | Homo sapiens OCIM           | 3.0643E-06 | 1.5416E-05 | 1.55565142 |
| PURB        | NM_033224.3 | PURB         | 7  | Homo sapiens MGC126786; I   | 4.5404E-07 | 3.8232E-06 | 1.55522497 |
| SLC25A4     | NM_001151.2 | SLC25A4      | 4  | Homo sapiens PEO2; ANT1; I  | 1.379E-09  | 1.1101E-07 | 1.55515851 |
| INTS5       | NM_030628.1 | INTS5        | 11 | Homo sapiens INT5; KIAA16   | 1.2609E-06 | 7.936E-06  | 1.55450521 |
| LOC10012966 | XM_00171360 | LOC10012966  | 6  | PREDICTED: Homo sapiens h   | 1.5655E-09 | 1.164E-07  | 1.55329799 |
| AADACL1     | NM_020792.3 | AADACL1      | 3  | Homo sapiens arylacetamide  | 1.6952E-06 | 9.9621E-06 | 1.55301595 |
| UFM1        | NM_016617.1 | UFM1         | 13 | Homo sapiens BA131P10.1; C  | 1.5539E-06 | 9.3318E-06 | 1.55189191 |
| TMEM56      | NM_152487.1 | TMEM56       | 1  | Homo sapiens MGC102912; I   | 0.05276953 | 0.04633706 | 1.55075049 |
| ID2         | NM_002166.4 | ID2          | 2  | Homo sapiens GIG8; MGC26    | 2.531E-09  | 1.4514E-07 | 1.54990993 |
|             | Hs.154336   | HS.154336    | 9  | Homo sapiens clone 24583 rr | 0.00792244 | 0.00940743 | 1.54966598 |
| TM7SF2      | NM_003273.1 | TM7SF2       | 11 | Homo sapiens ANG1; DHCR1    | 2.4832E-08 | 5.63E-07   | 1.54825237 |
| CHIC2       | NM_012110.2 | CHIC2        | 4  | Homo sapiens BTL; MGC211    | 2.0434E-06 | 1.142E-05  | 1.54605059 |
| ZCCHC14     | NM_015144.1 | ZCCHC14      | 16 | Homo sapiens MGC126527; I   | 1.0767E-07 | 1.4578E-06 | 1.54599615 |
| ERMAP       | NM_00101792 | ERMAP        | 1  | Homo sapiens SC; MGC1188    | 0.05390073 | 0.04724998 | 1.54594526 |
| KIDINS220   | NM_020738.1 | KIDINS220    | 2  | Homo sapiens ARMS; MGC16    | 6.4604E-06 | 2.7121E-05 | 1.54584506 |
| ASAP3       | NM_017707.2 | ASAP3        | 1  | Homo sapiens CENTB6; ACAF   | 6.2456E-07 | 4.7776E-06 | 1.5456573  |
| ZBTB48      | NM_005341.1 | ZBTB48       | 1  | Homo sapiens pp9964; HKR    | 3.6498E-06 | 1.7634E-05 | 1.54478823 |
| CELSR2      | NM_001408.1 | CELSR2       | 1  | Homo sapiens CDHF10; FLJ4   | 0.00068523 | 0.00116652 | 1.54447618 |
| CGRRF1      | NM_006568.2 | CGRRF1       | 14 | Homo sapiens RNF197; CGR:   | 2.8296E-05 | 8.6235E-05 | 1.54330081 |
| OKL38       | NM_013370.2 | OKL38        | 16 | Homo sapiens BDGI           | 5.8679E-06 | 2.5139E-05 | 1.54260466 |
| SYNJ2BP     | NM_018373.1 | SYNJ2BP      | 14 | Homo sapiens Arip2; OMP25;  | 6.0683E-08 | 9.7515E-07 | 1.54256683 |
| SLC35A5     | NM_017945.2 | SLC35A5      | 3  | Homo sapiens FLJ25973; DK   | 9.5968E-05 | 0.0002319  | 1.54157371 |
| SNORA80     | NR_002996.2 | SNORA80      | 21 | Homo sapiens ACA67          | 0.00846491 | 0.00996125 | 1.54114793 |
| PIGM        | NM_145167.1 | PIGM         | 1  | Homo sapiens MGC29896       | 3.482E-06  | 1.7049E-05 | 1.54018033 |
| MTMR6       | NM_004685.2 | MTMR6        | 13 | Homo sapiens myotubularin I | 0.00154838 | 0.00232828 | 1.53970907 |
| LOC151162   | NR_024275.1 | LOC151162    | 2  | Homo sapiens hypothetical L | 1.4832E-09 | 1.1317E-07 | 1.53960442 |
|             | Hs.491292   | HS.491292    | 8  | Homo sapiens cDNA FLJ3655   | 0.00392758 | 0.00516728 | 1.53917135 |
| TSTA3       | NM_003313.2 | TSTA3        | 8  | Homo sapiens FX; P35B       | 4.731E-05  | 0.00013057 | 1.53883797 |
| POFUT2      | NM_015227.3 | POFUT2       | 21 | Homo sapiens C21orf80; FUT  | 9.4105E-07 | 6.4106E-06 | 1.53794211 |
| C15orf57    | NM_052849.2 | C15ORF57     | 15 | Homo sapiens MGC20481; FL   | 1.2846E-06 | 8.0392E-06 | 1.53724052 |
| PREB        | NM_013388.4 | PREB         | 2  | Homo sapiens SEC12; MGC3    | 3.4925E-07 | 3.1721E-06 | 1.53660142 |
|             | Hs.545615   | HS.545615    | 9  | od80c09.s1 NCI_CGAP_Ov2 I   | 0.00049422 | 0.00089223 | 1.5363197  |
| CBWD3       | NM_201453.2 | CBWD3        | 9  | Homo sapiens BA561023.1     | 1.4615E-05 | 5.1539E-05 | 1.53619444 |
| RELL1       | NM_00108540 | RELL1        | 4  | Homo sapiens MGC50583; FL   | 7.2027E-05 | 0.00018307 | 1.53597547 |
| C6orf170    | NM_152730.4 | C6ORF170     | 6  | Homo sapiens BA301B7.2; FL  | 0.00013377 | 0.00030243 | 1.53591411 |
| MPV17       | NM_002437.3 | MPV17        | 2  | Homo sapiens SYM1           | 3.9508E-07 | 3.4492E-06 | 1.53489098 |
| DNAJC25     | NM_00101588 | DNAJC25      | 9  | Homo sapiens DnaJ (Hsp40)   | 0.00011622 | 0.00026998 | 1.53273176 |
| THYN1       | NM_014174.2 | THYN1        | 11 | Homo sapiens MY105; MGC1    | 4.6988E-07 | 3.9004E-06 | 1.532493   |
| GRK5        | NM_005308.2 | GRK5         | 10 | Homo sapiens GPRK5          | 5.0155E-06 | 2.2441E-05 | 1.53199956 |
| JARID2      | NM_004973.2 | JARID2       | 6  | Homo sapiens JMJ            | 3.2879E-07 | 3.0657E-06 | 1.53180339 |
| TMEM42      | NM_144638.1 | TMEM42       | 3  | Homo sapiens MGC29956       | 3.8969E-05 | 0.00011152 | 1.53149505 |
| TPST2       | NM_00100856 | TPST2        | 22 | Homo sapiens tyrosylprotein | 7.8524E-06 | 3.1474E-05 | 1.53146801 |
| ARL4A       | NM_00103716 | ARL4A        | 7  | Homo sapiens ARL4           | 0.00025592 | 0.00051584 | 1.5301075  |
| ULK1        | XM_942125.1 | ULK1         | 7  | PREDICTED: Homo sapiens u   | 2.5903E-07 | 2.571E-06  | 1.53006949 |
| TSPAN9      | NM_006675.3 | TSPAN9       | 12 | Homo sapiens PP1057; NET-!  | 4.9903E-09 | 1.9902E-07 | 1.52999377 |
| C12orf44    | NM_021934.3 | C12ORF44     | 12 | Homo sapiens FLJ11773       | 2.5172E-08 | 5.6631E-07 | 1.5297754  |
| MAST3       | XM_038150.5 | MAST3        | 19 | Homo sapiens KIAA0561       | 2.1027E-05 | 6.8585E-05 | 1.52957927 |
| SORL1       | NM_003105.3 | SORL1        | 11 | Homo sapiens LR11; LRP9; S  | 0.00419959 | 0.00546695 | 1.52897523 |

## 5.0 ACL-Indepen Upreg

|             |             |             |    |                             |            |            |            |
|-------------|-------------|-------------|----|-----------------------------|------------|------------|------------|
| FLJ10986    | NM_018291.2 | FLJ10986    | 1  | Homo sapiens RP11-242B9.1   | 0.01228847 | 0.0136428  | 1.52676519 |
| POLR3H      | NM_00101805 | POLR3H      | 22 | Homo sapiens RPC8; MGC29    | 0.00097376 | 0.00157084 | 1.52667419 |
| FLJ31306    | XM_00171796 | FLJ31306    | 14 | PREDICTED: Homo sapiens h   | 0.00013158 | 0.00029824 | 1.52594802 |
| CLCN3       | NM_001829.2 | CLCN3       | 4  | Homo sapiens CIC-3; CLC3    | 8.7201E-05 | 0.0002148  | 1.52560753 |
| ASB1        | NM_016114.3 | ASB1        | 2  | Homo sapiens MGC11165; KI   | 4.8099E-06 | 2.1776E-05 | 1.52503176 |
| TTC14       | NM_133462.1 | TTC14       | 3  | Homo sapiens DRDL5813; KI   | 0.00129024 | 0.00199798 | 1.52473895 |
| LOC644799   | XM_934554.1 | LOC644799   | 20 | PREDICTED: Homo sapiens h   | 2.8086E-08 | 5.9381E-07 | 1.52461179 |
| C1orf97     | NM_032705.2 | C1ORF97     | 1  | Homo sapiens MGC14801; FL   | 7.5697E-07 | 5.4664E-06 | 1.52363232 |
| LOC283788   | XM_00172358 | LOC283788   |    | PREDICTED: Homo sapiens h   | 0.01769516 | 0.01857146 | 1.52164091 |
| ANKRD20A1   | NM_00101242 | ANKRD20A1   |    | Homo sapiens DKFZp434A17    | 0.00035237 | 0.00067254 | 1.52112854 |
| GCLC        | NM_001498.2 | GCLC        | 6  | Homo sapiens GCS; GLCLC; I  | 0.00029204 | 0.00057425 | 1.52063592 |
| FAM131A     | NM_144635.3 | FAM131A     | 3  | Homo sapiens MGC21688; PF   | 3.6373E-05 | 0.00010588 | 1.52006773 |
| SRXN1       | NM_080725.1 | SRXN1       | 20 | Homo sapiens Npn3; SRX1; C  | 4.6784E-09 | 1.9271E-07 | 1.520048   |
| ADARB1      | NM_00103304 | ADARB1      | 21 | Homo sapiens ADAR2a; ADAI   | 0.00069206 | 0.00117655 | 1.51972419 |
| AXUD1       | NM_033027.2 | AXUD1       | 3  | Homo sapiens FAM130B; TAI   | 3.3168E-05 | 9.7854E-05 | 1.51966684 |
| CYP26B1     | NM_019885.2 | CYP26B1     | 2  | Homo sapiens CYP26A2; MGC   | 3.0325E-07 | 2.9079E-06 | 1.51962212 |
| TRAK2       | NM_015049.1 | TRAK2       | 2  | Homo sapiens KIAA0549; GR   | 6.2268E-05 | 0.00016231 | 1.51897916 |
| ELL2        | NM_012081.3 | ELL2        |    | Homo sapiens elongation fac | 0.00246993 | 0.00346296 | 1.51875124 |
| TUBB4       | NM_006087.2 | TUBB4       | 19 | Homo sapiens TUBB5; beta-t  | 1.0463E-06 | 6.9389E-06 | 1.5172004  |
| C1orf66     | NM_015997.2 | C1ORF66     | 1  | Homo sapiens CGI-41         | 0.00010181 | 0.00024347 | 1.51710049 |
| COG3        | NM_031431.2 | COG3        | 13 | Homo sapiens SEC34          | 0.00247    | 0.0034625  | 1.51651692 |
| TMEM184C    | NM_018241.2 | TMEM184C    | 4  | Homo sapiens transmembran   | 7.1994E-05 | 0.00018304 | 1.51628884 |
| NSUN6       | NM_182543.1 | NSUN6       | 10 | Homo sapiens 4933414E04R    | 0.00054598 | 0.0009709  | 1.51613875 |
| MERTK       | NM_006343.2 | MERTK       | 2  | Homo sapiens MGC133349; C   | 0.01084298 | 0.01228833 | 1.51513043 |
| HEYL        | NM_014571.2 | HEYL        | 1  | Homo sapiens MGC12623; H    | 4.9124E-06 | 2.2103E-05 | 1.51427218 |
| GRB2        | NM_002086.3 | GRB2        | 17 | Homo sapiens MST084; ASH    | 4.2631E-05 | 0.00011993 | 1.51418806 |
| TMEM206     | NM_018252.2 | TMEM206     | 1  | Homo sapiens C1orf75; RP11  | 5.7332E-06 | 2.4731E-05 | 1.51387588 |
| ZNF212      | NM_012256.2 | ZNF212      | 7  | Homo sapiens MGC9707; ZN    | 0.00011144 | 0.00026103 | 1.51360013 |
| CHKA        | XM_945706.1 | CHKA        |    | PREDICTED: Homo sapiens c   | 2.7347E-06 | 1.4206E-05 | 1.5128378  |
| LOC643882   | XM_931879.1 | LOC643882   | 12 | PREDICTED: Homo sapiens h   | 0.00042412 | 0.00078591 | 1.51255575 |
| C16orf56    | NM_025082.1 | C16ORF56    | 16 | Homo sapiens FLJ13111       | 1.5E-06    | 9.0514E-06 | 1.51207269 |
| GOLGA8B     | NM_00102356 | GOLGA8B     |    | Homo sapiens KIAA0855; GC   | 7.1004E-08 | 1.076E-06  | 1.51178702 |
| ZDHHC9      | NM_00100822 | ZDHHC9      |    | Homo sapiens ZNF379; CGI-I  | 7.282E-05  | 0.00018477 | 1.51135251 |
| LOC653344   | XM_933085.1 | LOC653344   | 15 | PREDICTED: Homo sapiens s   | 7.5281E-08 | 1.1157E-06 | 1.51108564 |
| DYNLL2      | NM_080677.1 | DYNLL2      | 17 | Homo sapiens MGC17810; D    | 1.0161E-07 | 1.3974E-06 | 1.51091457 |
| TBCE        | NM_003193.3 | TBCE        | 1  | Homo sapiens KCS; KCS1; p   | 1.6232E-07 | 1.8989E-06 | 1.5103377  |
| TTYH3       | NM_025250.2 | TTYH3       | 7  | Homo sapiens KIAA1691       | 0.00019799 | 0.00041639 | 1.51014023 |
| NUDT22      | NM_032344.1 | NUDT22      | 11 | Homo sapiens MGC13045       | 2.7087E-05 | 8.3243E-05 | 1.51009113 |
| LOC346887   | XM_943533.1 | LOC346887   |    | PREDICTED: Homo sapiens s   | 1.6521E-08 | 4.3143E-07 | 1.50991052 |
| EIF4EBP2    | NM_004096.3 | EIF4EBP2    | 10 | Homo sapiens 4EBP2          | 1.7981E-06 | 1.0407E-05 | 1.50955134 |
| CPSP3L      | NM_017871.3 | CPSP3L      | 1  | Homo sapiens RC68; RC-68;   | 4.4007E-06 | 2.0397E-05 | 1.508362   |
| TSC1        | NM_000368.3 | TSC1        | 9  | Homo sapiens TSC; LAM; MG   | 1.9794E-05 | 6.5388E-05 | 1.50793378 |
| B9D2        | NM_030578.2 | B9D2        | 19 | Homo sapiens MGC4093; ICI   | 0.00764938 | 0.00912641 | 1.50761467 |
| SPRY1       | NM_005841.1 | SPRY1       | 4  | Homo sapiens hSPRY1         | 0.05109334 | 0.04512713 | 1.50759071 |
| DGKQ        | NM_001347.2 | DGKQ        | 4  | Homo sapiens DAGK7; DAGK    | 5.9924E-08 | 9.6472E-07 | 1.50710209 |
| SCPEP1      | NM_021626.1 | SCPEP1      | 17 | Homo sapiens RISC; HSCP1    | 1.8633E-08 | 4.6843E-07 | 1.50702708 |
| INSIG2      | NM_016133.2 | INSIG2      | 2  | Homo sapiens MGC26273       | 8.4885E-06 | 3.353E-05  | 1.5069367  |
| CPT2        | NM_000098.1 | CPT2        | 1  | Homo sapiens CPTASE; CPT1   | 1.3495E-05 | 4.8152E-05 | 1.50693222 |
| NECAP2      | NM_018090.3 | NECAP2      | 1  | Homo sapiens FLJ10420; RP   | 2.5964E-07 | 2.5741E-06 | 1.50675981 |
| ST7L        | NM_138729.2 | ST7L        | 1  | Homo sapiens FLJ11657; FLJ  | 0.01762678 | 0.01851075 | 1.50583137 |
| TMEM111     | NM_018447.1 | TMEM111     | 3  | Homo sapiens POB            | 1.5107E-05 | 5.2786E-05 | 1.50426718 |
| M160        | NM_174941.3 | M160        | 12 | Homo sapiens CD163B         | 5.4018E-06 | 2.3591E-05 | 1.50425137 |
| RNF216      | NM_019011.4 | RNF216      | 7  | Homo sapiens ZIN; UBCE7IP   | 1.0809E-05 | 4.0427E-05 | 1.50414623 |
| GTF2B       | NM_001514.3 | GTF2B       | 1  | Homo sapiens TFIIB; TF2B    | 1.587E-07  | 1.869E-06  | 1.50414001 |
| FAM105A     | NM_019018.1 | FAM105A     | 5  | Homo sapiens FLJ11127       | 0.03089259 | 0.02968801 | 1.50412807 |
| MT1A        | NM_005946.2 | MT1A        | 16 | Homo sapiens MTC; MT1; MC   | 8.8735E-06 | 3.4496E-05 | 1.50378617 |
| ACTR1B      | NM_005735.2 | ACTR1B      | 2  | Homo sapiens CTRN2; ARP1E   | 3.0762E-07 | 2.9242E-06 | 1.50323018 |
| TOM1        | NM_005488.1 | TOM1        | 22 | Homo sapiens FLJ33404       | 0.00016302 | 0.00035616 | 1.50240534 |
| UBN1        | NM_00107951 | UBN1        | 16 | Homo sapiens VT4; VT        | 3.195E-07  | 3.0014E-06 | 1.50210735 |
| FAM188A     | NM_024948.2 | FAM188A     | 10 | Homo sapiens DERP5; MST1;   | 4.9212E-08 | 8.4004E-07 | 1.50094772 |
| RABEP1      | NM_004703.3 | RABEP1      | 17 | Homo sapiens RABPT5; RAB    | 1.6337E-07 | 1.8985E-06 | 1.50079199 |
| ACAA1       | NM_001607.2 | ACAA1       | 3  | Homo sapiens THIO; ACAA; I  | 1.2304E-05 | 4.4927E-05 | 1.50067966 |
| NUDT18      | NM_024815.2 | NUDT18      | 8  | Homo sapiens FLJ22494       | 4.6515E-05 | 0.00012879 | 1.50033758 |
| PIK3AP1     | NM_152309.2 | PIK3AP1     | 10 | Homo sapiens BCAP; RP11-3   | 0.0491696  | 0.04374066 | 1.49991423 |
| FAM53B      | NM_014661.3 | FAM53B      | 10 | Homo sapiens RP11-12J10.2   | 0.0053148  | 0.0066952  | 1.4994885  |
| SNX22       | NM_024798.2 | SNX22       | 15 | Homo sapiens FLJ13952       | 0.00280947 | 0.00385462 | 1.49935108 |
| PLCG1       | NM_182811.1 | PLCG1       | 20 | Homo sapiens PLC1; PLCgam   | 0.00041369 | 0.00076982 | 1.49802776 |
| LOC10013109 | XM_00172620 | LOC10013109 |    | PREDICTED: Homo sapiens h   | 0.00047838 | 0.00086792 | 1.49764239 |
| PDE6D       | NM_002601.2 | PDE6D       | 2  | Homo sapiens PDED           | 2.0453E-07 | 2.1885E-06 | 1.49649773 |
| BAP1        | NM_004656.2 | BAP1        | 3  | Homo sapiens KIAA0272; DK   | 0.00062789 | 0.00108682 | 1.49599503 |

## 5.0 ACL-Indepen Upreg

|           |                       |   |                                 |            |            |            |
|-----------|-----------------------|---|---------------------------------|------------|------------|------------|
| PPIL6     | NM_173672.1 PPIL6     |   | 6 Homo sapiens bA425D10.6;      | 0.01633101 | 0.01734935 | 1.49569884 |
| PTK6      | NM_005975.2 PTK6      |   | 20 Homo sapiens FLJ42088; BR    | 0.02659698 | 0.02628837 | 1.49558871 |
|           | Hs.580797 HS.580797   |   | 20 MR1-GN0172-061100-005-h      | 0.0066299  | 0.00808264 | 1.49548997 |
| YIF1B     | NM_00103173 YIF1B     |   | 19 Homo sapiens FinGER8         | 3.3047E-07 | 3.0715E-06 | 1.49499373 |
| RBL2      | NM_005611.2 RBL2      |   | 16 Homo sapiens Rb2; P130; FL   | 2.6536E-05 | 8.1867E-05 | 1.49251581 |
| EVI5L     | NM_145245.2 EVI5L     |   | 19 Homo sapiens ecotropic viral | 2.3189E-06 | 1.2528E-05 | 1.49187078 |
| PTRH1     | NM_00100291 PTRH1     |   | 9 Homo sapiens MGC51999; P      | 0.00022156 | 0.00045611 | 1.49179936 |
| SPAG9     | NM_172345.1 SPAG9     |   | 17 Homo sapiens PHET; MGC74     | 2.8443E-05 | 8.6592E-05 | 1.49167543 |
| MTMR15    | NM_014967.3 MTMR15    |   | 15 Homo sapiens DKFZp451H23     | 0.00126168 | 0.00195929 | 1.49110747 |
| ABHD12    | NM_00104247 ABHD12    |   | 20 Homo sapiens DKFZP434P10     | 0.00234216 | 0.0033156  | 1.48983167 |
| PSCD1     | NM_017456.1 PSCD1     |   | 17 Homo sapiens D17S811E; B2    | 2.2051E-07 | 2.3171E-06 | 1.48931867 |
| TUSC2     | NM_007275.1 TUSC2     |   | 3 Homo sapiens FUS1; C3orf11    | 0.00114859 | 0.00181026 | 1.48908982 |
|           | Hs.371609 HS.371609   |   | 3 Homo sapiens cDNA clone IM    | 9.4975E-06 | 3.6437E-05 | 1.48871371 |
| KLHL9     | NM_018847.1 KLHL9     |   | 9 Homo sapiens RP11-380P16.     | 2.2241E-07 | 2.3231E-06 | 1.48862245 |
| RAGE      | NM_014226.1 RAGE      |   | 14 Homo sapiens MOK; RAGE1      | 0.04884884 | 0.04351266 | 1.48835495 |
| PRKD2     | NM_016457.1 PRKD2     |   | 19 Homo sapiens HSPC187; PKI    | 0.00018667 | 0.00039696 | 1.48825985 |
| WDR19     | NM_025132.3 WDR19     |   | 4 Homo sapiens PWDMP; KIAA      | 0.00391477 | 0.00515274 | 1.4872549  |
| CABC1     | NM_020247.3 CABC1     |   | 1 Homo sapiens MGC4849; CO      | 3.4014E-07 | 3.125E-06  | 1.48703436 |
| ARL8B     | NM_018184.2 ARL8B     |   | 3 Homo sapiens FLJ10702; AR     | 8.7911E-09 | 2.9667E-07 | 1.48652931 |
| KIAA1128  | NM_018999.1 KIAA1128  |   | 10 Homo sapiens FLJ14262; bA    | 0.00033944 | 0.00065227 | 1.48590274 |
| DUSP1     | NM_004417.2 DUSP1     |   | 5 Homo sapiens HVH1; MKP1;      | 3.8235E-08 | 7.2301E-07 | 1.48578826 |
| ELMOD2    | NM_153702.1 ELMOD2    |   | 4 Homo sapiens MGC10084; 9f     | 0.00607812 | 0.00752178 | 1.48529572 |
| ZNF503    | NM_032772.4 ZNF503    |   | 10 Homo sapiens zinc finger pro | 1.4605E-06 | 8.8682E-06 | 1.48418726 |
| UBL7      | NM_032970.3 UBL7      |   | 15 Homo sapiens TCBA1; MGC1     | 0.00014095 | 0.00031572 | 1.48363918 |
| GPR158L1  | XM_936553.1 GPR158L1  |   | PREDICTED: Homo sapiens C       | 0.05464785 | 0.04777127 | 1.48320128 |
| YIPF1     | NM_018982.3 YIPF1     |   | 1 Homo sapiens FinGER1; DJ1f    | 7.581E-07  | 5.4701E-06 | 1.48255998 |
| PLCB2     | NM_004573.1 PLCB2     |   | 15 Homo sapiens FLJ38135        | 0.0423925  | 0.03867649 | 1.48148406 |
| TMEM149   | NM_024660.1 TMEM149   |   | 19 Homo sapiens U2AF1L4; FLJ    | 0.03814826 | 0.0354306  | 1.48125102 |
| TBC1D20   | NM_144628.2 TBC1D20   |   | 20 Homo sapiens FLJ45119; C2f   | 0.00020872 | 0.00043488 | 1.48063115 |
| LOC642076 | XM_00171749 LOC642076 |   | 6 PREDICTED: Homo sapiens s     | 0.0452058  | 0.04083135 | 1.48037349 |
| GIYD1     | NM_00101499 GIYD1     |   | 16 Homo sapiens GIY-YIG doma    | 0.0014944  | 0.00226144 | 1.47988149 |
| C1orf52   | NM_198077.1 C1ORF52   |   | 1 Homo sapiens RP11-234D19.     | 5.2782E-07 | 4.2644E-06 | 1.47875252 |
| CRK       | NM_016823.2 CRK       |   | 17 Homo sapiens CRKII           | 1.2049E-07 | 1.5616E-06 | 1.47807629 |
| ISCA1     | NM_030940.3 ISCA1     |   | 9 Homo sapiens hIsCA; RP11-5    | 3.618E-05  | 0.00010546 | 1.47799911 |
| RHBDF1    | NM_022450.2 RHBDF1    |   | 16 Homo sapiens gene -90; gen   | 2.5897E-06 | 1.3663E-05 | 1.477084   |
| NPTN      | NM_012428.1 NPTN      |   | 15 Homo sapiens SDFR1; GP55;    | 2.1333E-09 | 1.3182E-07 | 1.47663627 |
| PTGR2     | NM_152444.1 PTGR2     |   | 14 Homo sapiens FLJ39091; PGI   | 0.00396079 | 0.00520394 | 1.47593399 |
| DIRC2     | NM_032839.1 DIRC2     |   | 3 Homo sapiens FLJ14784; RCf    | 3.0645E-06 | 1.5408E-05 | 1.47521839 |
| TDRD7     | NM_014290.1 TDRD7     |   | 9 Homo sapiens PCTAIRE2BP; l    | 0.00605828 | 0.0075004  | 1.47465533 |
| CADM4     | NM_145296.1 CADM4     |   | 19 Homo sapiens Necl-4; TSSL2   | 0.00089289 | 0.0014597  | 1.4744944  |
| CHKB      | NM_152253.1 CHKB      |   | Homo sapiens CHK1; CHETK        | 0.00479881 | 0.00612611 | 1.47366469 |
| EPHA1     | NM_005232.3 EPHA1     |   | 7 Homo sapiens EPHT; MGC16:     | 1.052E-05  | 3.9562E-05 | 1.4736225  |
| TOP3B     | NM_003935.3 TOP3B     |   | 22 Homo sapiens FLJ39376        | 7.0326E-06 | 2.8874E-05 | 1.47315583 |
| PIGS      | NM_033198.2 PIGS      |   | 17 Homo sapiens FLJ45226; DK    | 0.00254031 | 0.00354238 | 1.47302658 |
| GABPAP    | XM_938337.1 GABPAP    |   | Homo sapiens E4TF1; GABPE       | 0.01485912 | 0.01599483 | 1.47289717 |
| C12orf5   | NM_020375.1 C12ORF5   |   | 12 Homo sapiens TIGAR           | 0.0002199  | 0.00045343 | 1.47196032 |
| ZNF45     | NM_003425.2 ZNF45     |   | 19 Homo sapiens KOX5; ZNF13     | 0.00250515 | 0.00350114 | 1.47186511 |
| ZNF669    | NM_024804.1 ZNF669    |   | 1 Homo sapiens FLJ12606         | 0.00206579 | 0.00297868 | 1.47164899 |
| FLVCR2    | NM_017791.1 FLVCR2    |   | 14 Homo sapiens FLVCR2; C14o    | 0.01947549 | 0.0201412  | 1.47076987 |
| IFNGR1    | NM_000416.1 IFNGR1    |   | 6 Homo sapiens CD119; IFNGF     | 5.4563E-08 | 8.9988E-07 | 1.47044471 |
| HSPC157   | NR_023919.1 HSPC157   |   | 1 Homo sapiens hypothetical L   | 2.2266E-05 | 7.1613E-05 | 1.47031518 |
| PIGF      | NM_173074.1 PIGF      |   | 2 Homo sapiens MGC32646; M      | 6.4912E-05 | 0.00016795 | 1.47009663 |
| HEATR5B   | NM_019024.1 HEATR5B   |   | 2 Homo sapiens KIAA1414         | 1.517E-05  | 5.2966E-05 | 1.47005596 |
| ATXN1     | NM_000332.2 ATXN1     |   | 6 Homo sapiens SCA1; D6S50      | 0.0002181  | 0.00045037 | 1.46815741 |
| MIDN      | NM_177401.4 MIDN      |   | 19 Homo sapiens DKFZp547M07     | 4.9895E-06 | 2.2347E-05 | 1.46671018 |
|           | Hs.294603 HS.294603   |   | 14 Homo sapiens cDNA FLJ1287    | 1.8047E-07 | 2.0171E-06 | 1.46663043 |
| ZBTB5     | NM_014872.1 ZBTB5     |   | 9 Homo sapiens zinc finger anc  | 9.0106E-05 | 0.0002204  | 1.46626645 |
|           | Hs.551538 HS.551538   |   | 7 Homo sapiens mRNA; cDNA l     | 1.5661E-05 | 5.4419E-05 | 1.46592194 |
| FBXO33    | NM_203301.1 FBXO33    |   | 14 Homo sapiens c14_5247; Fb;   | 3.54E-07   | 3.212E-06  | 1.4645599  |
| MUM1L1    | NM_152423.2 MUM1L1    | X | Homo sapiens MGC129994; l       | 0.0193043  | 0.0199948  | 1.46432057 |
| KIF1B     | NM_183416.2 KIF1B     |   | 1 Homo sapiens KIAA0591; HM     | 2.3834E-05 | 7.5495E-05 | 1.46381829 |
| CTSD      | NM_001909.3 CTSD      |   | 11 Homo sapiens CLN10; MGC2     | 0.00032207 | 0.00062285 | 1.46357488 |
| C15orf39  | NM_015492.3 C15ORF39  |   | 15 Homo sapiens DKFZP434H13     | 0.0011957  | 0.00187307 | 1.46249645 |
| POLR2J2   | NM_032959.4 POLR2J2   |   | 7 Homo sapiens MGC54043; M      | 5.5645E-07 | 4.4184E-06 | 1.46244472 |
| PRIC285   | NM_033405.2 PRIC285   |   | 20 Homo sapiens MGC138228; l    | 6.0235E-07 | 4.6523E-06 | 1.46091468 |
| CAPRIN2   | NM_023925.3 CAPRIN2   |   | 12 Homo sapiens MGC134848; l    | 2.9777E-06 | 1.5155E-05 | 1.46025547 |
| COG6      | NM_020751.1 COG6      |   | 13 Homo sapiens COD2; KIAA11    | 0.00019574 | 0.00041303 | 1.45967488 |
| TULP4     | NM_020245.3 TULP4     |   | 6 Homo sapiens RP3-442A17.1     | 0.00042201 | 0.00078248 | 1.45923134 |
| KIAA0672  | NM_014859.3 KIAA0672  |   | 17 Homo sapiens KIAA0672 gen    | 0.00029744 | 0.00058384 | 1.45777701 |
|           | Hs.296031 HS.296031   | X | Homo sapiens cDNA clone IM      | 6.5228E-06 | 2.7344E-05 | 1.45767772 |



## 5.0 ACL-Indepen Upreg

|           |                         |                                 |            |            |            |
|-----------|-------------------------|---------------------------------|------------|------------|------------|
| ARIH1     | NM_005744.2 ARIH1       | 15 Homo sapiens ARI; HHARI; L   | 4.4218E-05 | 0.00012356 | 1.45751192 |
| CBX4      | NM_003655.2 CBX4        | 17 Homo sapiens NBP16; PC2; I   | 3.37E-05   | 9.9257E-05 | 1.45665845 |
| CGN       | NM_020770.1 CGN         | 1 Homo sapiens FLJ39281; DK     | 1.7724E-06 | 1.0305E-05 | 1.45635342 |
| MNAT1     | NM_002431.2 MNAT1       | 14 Homo sapiens MAT1; RNF66     | 5.2622E-06 | 2.3201E-05 | 1.45607553 |
| C18orf32  | NM_00103500 C18ORF32    | 18 Homo sapiens FLJ23458        | 8.5902E-05 | 0.00021237 | 1.45591561 |
| ELF1      | NM_172373.2 ELF1        | 13 Homo sapiens E74-like factor | 1.6943E-06 | 9.9639E-06 | 1.45587391 |
| MGC4677   | XM_939115.1 MGC4677     | 2 Homo sapiens MGC17532; M      | 1.253E-05  | 4.5523E-05 | 1.4556088  |
| C15orf21  | NM_00100526 C15ORF21    | 15 Homo sapiens D-PCa-2; FLJ3   | 0.00102943 | 0.00164761 | 1.45545621 |
| PIH1D1    | NM_017916.1 PIH1D1      | 19 Homo sapiens NOP17; FLJ20    | 2.7809E-05 | 8.5074E-05 | 1.45468352 |
| TRAFD1    | NM_006700.1 TRAFD1      | 12 Homo sapiens FLN29           | 0.00360856 | 0.00479139 | 1.45453938 |
| EIF2S1    | NM_004094.4 EIF2S1      | 14 Homo sapiens EIF2A; EIF-2A   | 9.7664E-06 | 3.7289E-05 | 1.45444688 |
| ZNF252    | NR_023392.1 ZNF252      | 8 Homo sapiens zinc finger pro  | 2.7338E-06 | 1.4219E-05 | 1.45334277 |
| ZNF557    | NM_00104438 ZNF557      | 19 Homo sapiens MGC4054         | 0.00022896 | 0.00046914 | 1.45315813 |
| KDEL3     | NM_016657.1 KDEL3       | 22 Homo sapiens ERD2L3          | 1.2472E-06 | 7.8898E-06 | 1.45291554 |
| TTC1      | NM_003314.1 TTC1        | 5 Homo sapiens TPR1             | 4.1225E-06 | 1.9415E-05 | 1.45183187 |
| LOC645094 | XR_039085.1 LOC645094   | PREDICTED: Homo sapiens n       | 4.1327E-05 | 0.00011705 | 1.45133729 |
| SEZ6L2    | NM_201575.1 SEZ6L2      | Homo sapiens FLJ90517; PSI      | 3.2528E-05 | 9.6257E-05 | 1.45018884 |
| WDR26     | NM_025160.4 WDR26       | 1 Homo sapiens FLJ21016; MII    | 0.00332846 | 0.00447227 | 1.44842864 |
| SUPT5H    | NM_003169.2 SUPT5H      | 19 Homo sapiens SPT5H; SPT5;    | 1.0644E-06 | 7.0274E-06 | 1.44809681 |
| STX8      | NM_004853.1 STX8        | 17 Homo sapiens CARB            | 1.8307E-07 | 2.0332E-06 | 1.44764748 |
| ENDOD1    | XM_943182.1 ENDOD1      | 11 Homo sapiens MGC88092; KI    | 2.0181E-05 | 6.6342E-05 | 1.44632801 |
| APLP2     | NM_001642.1 APLP2       | 11 Homo sapiens CDEBP; APPH;    | 5.3942E-06 | 2.3582E-05 | 1.445811   |
| RAB1A     | NM_004161.3 RAB1A       | 2 Homo sapiens YPT1; RAB1; I    | 0.01698305 | 0.01795509 | 1.44526737 |
| TMEM132A  | NM_178031.2 TMEM132A    | 11 Homo sapiens DKFZp547E21     | 3.2889E-06 | 1.6294E-05 | 1.44471363 |
| SMA4      | NM_021652.2 SMA4        | Homo sapiens MGC22265           | 0.00036782 | 0.00069704 | 1.44467021 |
| GPAA1     | NM_003801.2 GPAA1       | 8 Homo sapiens hGAA1; GAA1      | 1.2616E-06 | 7.929E-06  | 1.44433586 |
| COBL      | NM_015198.2 COBL        | 7 Homo sapiens DKFZp686G13      | 3.3907E-07 | 3.1185E-06 | 1.4436396  |
| FBXO46    | XM_942691.1 FBXO46      | 19 PREDICTED: Homo sapiens F    | 0.00014894 | 0.00033007 | 1.44307705 |
| ZNF322A   | NM_024639.2 ZNF322A     | 6 Homo sapiens ZNF322; HCG:     | 0.00038598 | 0.00027611 | 1.4429024  |
| GLIPR2    | NM_022343.2 GLIPR2      | 9 Homo sapiens GLIPR2; GAPR     | 3.2888E-08 | 6.6182E-07 | 1.44269113 |
| EPHA2     | NM_004431.2 EPHA2       | 1 Homo sapiens ECK              | 6.9254E-05 | 0.00017715 | 1.44240505 |
| ZFAND6    | NM_019006.2 ZFAND6      | 15 Homo sapiens ZA20D3; AWP     | 1.2762E-05 | 4.6156E-05 | 1.44163108 |
| KLHL7     | NM_00103171 KLHL7       | 7 Homo sapiens KLHL6; SBB12     | 0.02144579 | 0.02189752 | 1.44158627 |
| OXR1      | NM_181354.3 OXR1        | 8 Homo sapiens FLJ10125; FLJ    | 7.0021E-07 | 5.1714E-06 | 1.44088798 |
| GOLGA7    | NM_016099.2 GOLGA7      | 8 Homo sapiens MGC4876; GO      | 4.2201E-06 | 1.979E-05  | 1.4406838  |
| TPM1      | NM_00101800 TPM1        | 15 Homo sapiens TPM1-alpha; T   | 0.00989175 | 0.01136891 | 1.44042195 |
| C10orf47  | NM_153256.2 C10ORF47    | 10 Homo sapiens MGC35403        | 0.0023561  | 0.00333103 | 1.44017376 |
| HTRA2     | NM_013247.4 HTRA2       | 2 Homo sapiens PARK13; OMI;     | 0.00059949 | 0.00104634 | 1.43907775 |
| TMEM50B   | NM_006134.4 TMEM50B     | 21 Homo sapiens C21orf4; HCVI   | 1.641E-06  | 9.7351E-06 | 1.43855838 |
| TIMP2     | XM_941104.1 TIMP2       | PREDICTED: Homo sapiens T       | 2.5929E-08 | 5.7449E-07 | 1.43843509 |
| ATP6V1D   | NM_015994.2 ATP6V1D     | 14 Homo sapiens ATP6M; VATD;    | 8.34E-09   | 2.8473E-07 | 1.43809614 |
| SAR1A     | NM_020150.3 SAR1A       | 10 Homo sapiens masra2; SARA    | 7.5383E-06 | 3.0396E-05 | 1.43769775 |
| BCDIN3D   | NM_181708.1 BCDIN3D     | 12 Homo sapiens BCDIN3 doma     | 7.5275E-06 | 3.038E-05  | 1.43754065 |
| ATP2B4    | NM_001684.3 ATP2B4      | 1 Homo sapiens DKFZp686M0E      | 8.9587E-05 | 0.00021944 | 1.43683791 |
| ZFP90     | NM_133458.1 ZFP90       | 16 Homo sapiens ZNF756; NK1C    | 0.00026463 | 0.00052998 | 1.43631833 |
| B3GALT6   | NM_080605.2 B3GALT6     | 1 Homo sapiens beta3GalT6       | 0.00230768 | 0.00327631 | 1.43611514 |
| TMEM99    | Hs.562720 TMEM99        | 17 Homo sapiens MGC21518        | 4.235E-07  | 3.6429E-06 | 1.43605111 |
| C1GALT1C1 | NM_00101155 C1GALT1C1 X | Homo sapiens MGC19947; C:       | 0.00010988 | 0.00025833 | 1.43591168 |
| SNAP47    | NM_053052.2 SNAP47      | 1 Homo sapiens DKFZp686M1C      | 0.00051102 | 0.00091598 | 1.43567372 |
| PNPLA2    | NM_020376.2 PNPLA2      | 11 Homo sapiens PEDF-R; FP17!   | 9.0946E-05 | 0.00022184 | 1.4356207  |
| NDFIP1    | NM_030571.2 NDFIP1      | 5 Homo sapiens N4WBP5; MGC      | 0.03823977 | 0.03550431 | 1.43541447 |
| PXDN      | NM_012293.1 PXDN        | 2 Homo sapiens D2S448E; D2S     | 0.00043777 | 0.00080575 | 1.43526635 |
| ZFPM1     | NM_153813.1 ZFPM1       | 16 Homo sapiens FOG1; ZNF40E    | 8.1153E-07 | 5.7608E-06 | 1.43466563 |
| WDR21A    | NM_015604.2 WDR21A      | 14 Homo sapiens MGC46524; W     | 0.00011124 | 0.00026076 | 1.4336557  |
| TEX2      | NM_018469.3 TEX2        | 17 Homo sapiens KIAA1738; TM    | 1.179E-06  | 7.5842E-06 | 1.43347724 |
| C12orf51  | NM_00110966 C12ORF51    | 12 Homo sapiens FLJ30208; KIA   | 7.4396E-05 | 0.00018795 | 1.4333792  |
| STK38     | NM_007271.2 STK38       | 6 Homo sapiens NDR1; NDR        | 9.9237E-06 | 3.7775E-05 | 1.43278986 |
| PRKAB2    | NM_005399.3 PRKAB2      | 1 Homo sapiens MGC61468         | 0.01181628 | 0.01320545 | 1.43222881 |
| HADHB     | NM_000183.2 HADHB       | 2 Homo sapiens MGC87480; M      | 5.7872E-05 | 0.00015317 | 1.43187043 |
| B4GALT4   | NM_003778.3 B4GALT4     | 3 Homo sapiens B4Gal-T4; bet    | 0.00132909 | 0.0020491  | 1.43152336 |
| KIAA1467  | NM_020853.1 KIAA1467    | 12 Homo sapiens DKFZp781O01     | 0.00886151 | 0.01036402 | 1.43124349 |
| LZTR1     | NM_006767.2 LZTR1       | 22 Homo sapiens MGC21205; T     | 3.6391E-08 | 7.002E-07  | 1.43121422 |
| FGFR10P2  | NM_015633.1 FGFR10P2    | 12 Homo sapiens DKFZp564O18     | 4.5699E-06 | 2.0927E-05 | 1.43055207 |
| NR4A2     | NM_006186.2 NR4A2       | 2 Homo sapiens RNR1; NOT; T:    | 2.8273E-06 | 1.455E-05  | 1.43044679 |
| ASAP2     | NM_003887.2 ASAP2       | 2 Homo sapiens ArfGAP with Si   | 0.00011343 | 0.00026454 | 1.43025715 |
| COG2      | NM_007357.1 COG2        | 1 Homo sapiens LDLC             | 0.00010292 | 0.00024558 | 1.42980729 |
| KLF2      | NM_016270.2 KLF2        | 19 Homo sapiens LKLF            | 6.4445E-10 | 7.3433E-08 | 1.42942376 |
| CYB5A     | NM_148923.2 CYB5A       | 18 Homo sapiens MCBS; CYB5      | 3.2186E-07 | 3.0106E-06 | 1.4290106  |
| MAOB      | NM_000898.3 MAOB X      | Homo sapiens MGC26382           | 9.0758E-07 | 6.2358E-06 | 1.42899703 |
| SEPHS2    | NM_012248.2 SEPHS2      | 16 Homo sapiens SPS2            | 0.00017081 | 0.00036931 | 1.42886067 |

## 5.0 ACL-Indepen Upreg

|             |             |              |    |                              |            |            |            |
|-------------|-------------|--------------|----|------------------------------|------------|------------|------------|
| NANS        | NM_018946.2 | NANS         | 9  | Homo sapiens SAS             | 4.7591E-06 | 2.1579E-05 | 1.42819821 |
| SP4         | NM_003112.3 | SP4          | 7  | Homo sapiens MGC130009; ;    | 0.00148726 | 0.00225297 | 1.42817297 |
| ATP6V0A1    | NM_005177.2 | ATP6V0A1     | 17 | Homo sapiens ATP6N1; VPP1    | 2.6009E-09 | 1.4535E-07 | 1.42570686 |
| FAM127A     | NM_003928.1 | FAM127A      | X  | Homo sapiens CXX1; MAR8C     | 8.274E-07  | 5.831E-06  | 1.42356529 |
| TMEM179B    | NM_199337.2 | TMEM179B     | 11 | Homo sapiens transmembrar    | 1.6615E-06 | 9.8368E-06 | 1.42346117 |
| LOC255783   | XR_001409.1 | LOC255783    | 19 | Homo sapiens hypothetical p  | 2.1924E-05 | 7.0695E-05 | 1.42319241 |
| EIF1AY      | NM_004681.2 | EIF1AY       | Y  | Homo sapiens eukaryotic tra  | 0.00901871 | 0.01051983 | 1.42230719 |
| DHRS7B      | NM_015510.3 | DHRS7B       | 17 | Homo sapiens MGC8916; CG     | 9.1903E-06 | 3.5538E-05 | 1.42220493 |
| GFM1        | NM_024996.5 | GFM1         | 3  | Homo sapiens FLJ12662; EFC   | 1.4971E-06 | 9.0467E-06 | 1.42208643 |
| PLXNA3      | NM_017514.2 | PLXNA3       | X  | Homo sapiens XAF-6; HSSEX    | 0.00010434 | 0.00024836 | 1.42116604 |
| RHBDL2      | NM_017821.3 | RHBDL2       | 1  | Homo sapiens RRP2; MGC16'    | 0.0001352  | 0.00030488 | 1.42068836 |
| FES         | NM_002005.2 | FES          | 15 | Homo sapiens FPS             | 1.1393E-05 | 4.2195E-05 | 1.42000589 |
| VPS25       | NM_032353.2 | VPS25        | 17 | Homo sapiens MGC10540; F/    | 0.00010808 | 0.00025505 | 1.41946359 |
| SPRED2      | NM_181784.1 | SPRED2       | 2  | Homo sapiens MGC163164; I    | 3.9411E-05 | 0.00011256 | 1.41943555 |
| IGF2R       | NM_000876.1 | IGF2R        | 6  | Homo sapiens M6P-R; CD22     | 8.1259E-08 | 1.1843E-06 | 1.41920779 |
| C20orf127   | NM_080757.1 | C20ORF127    | 20 | Homo sapiens dJ614O4.6; M/   | 4.4948E-08 | 7.8874E-07 | 1.41902486 |
| SEMA4F      | NM_004263.2 | SEMA4F       | 2  | Homo sapiens PRO2353; M-S    | 6.6417E-05 | 0.00017109 | 1.41896223 |
| ZNRF3       | XM_945269.1 | ZNRF3        | 22 | Homo sapiens RNF203; BK74    | 0.02890965 | 0.02811185 | 1.41854364 |
| PRPF18      | NM_003675.2 | PRPF18       | 10 | Homo sapiens PRP18; FLJ10;   | 0.0013498  | 0.00207519 | 1.41801221 |
| LOC10013017 | XR_038676.1 | LOC100130171 |    | PREDICTED: Homo sapiens n    | 0.00464058 | 0.00594922 | 1.41773729 |
| DRG2        | NM_001388.3 | DRG2         | 17 | Homo sapiens developmenta    | 6.5529E-05 | 0.00016925 | 1.41748218 |
| VTA1        | NM_016485.3 | VTA1         | 6  | Homo sapiens My012; FLJ27.   | 0.00322969 | 0.00435289 | 1.41747528 |
| NAT14       | NM_020378.2 | NAT14        | 19 | Homo sapiens KLP1            | 6.0767E-06 | 2.5857E-05 | 1.41734047 |
| UBXN2B      | NM_00107761 | UBXN2B       | 8  | Homo sapiens p37             | 0.00011036 | 0.00025904 | 1.41728677 |
| PTEN        | NM_000314.3 | PTEN         | 10 | Homo sapiens MMAC1; MHA      | 4.2335E-06 | 1.9842E-05 | 1.41660721 |
| KLHL28      | NM_017658.3 | KLHL28       | 14 | Homo sapiens FLJ20081; BTI   | 0.00251381 | 0.00351045 | 1.41646608 |
| ELOVL5      | NM_021814.3 | ELOVL5       | 6  | Homo sapiens HELO1; RP3-4    | 1.2385E-06 | 7.863E-06  | 1.41644967 |
| CRYZL1      | NM_145858.1 | CRYZL1       | 21 | Homo sapiens QOH-1; 4P11     | 0.00244103 | 0.00343011 | 1.41644138 |
| NEURL1B     | NM_00114265 | NEURL1B      | 5  | Homo sapiens neutralized h   | 0.00012459 | 0.00028258 | 1.41622796 |
| TNK2        | NM_005781.4 | TNK2         | 3  | Homo sapiens p21cdc42Hs; I   | 5.739E-05  | 0.0001524  | 1.4161273  |
| RIOK3       | NM_003831.2 | RIOK3        | 18 | Homo sapiens DKFZp779L13     | 2.1924E-06 | 1.1985E-05 | 1.41596382 |
| ID3         | NM_002167.2 | ID3          | 1  | Homo sapiens HEIR-1          | 3.862E-10  | 5.9448E-08 | 1.41531547 |
| C8orf55     | NM_016647.1 | C8ORF55      | 8  | Homo sapiens DSCD75          | 3.7269E-07 | 3.3064E-06 | 1.41447817 |
|             | Hs.534061   | HS.534061    | 17 | full-length cDNA clone XCL0E | 1.3809E-07 | 1.7017E-06 | 1.41262051 |
| LOC644852   | XM_946031.1 | LOC644852    |    | PREDICTED: Homo sapiens h    | 0.00858545 | 0.01008417 | 1.41230595 |
| MYO9A       | NM_006901.1 | MYO9A        | 15 | Homo sapiens MGC71859; FI    | 0.00779177 | 0.00926607 | 1.41215981 |
| HN1         | NM_016185.2 | HN1          | 17 | Homo sapiens HN1A; ARM2      | 2.154E-08  | 5.8004E-07 | 1.4104763  |
| DOPEY2      | NM_005128.2 | DOPEY2       | 21 | Homo sapiens C21orf5         | 0.00132128 | 0.00203813 | 1.40942124 |
| FBXL18      | NM_024963.2 | FBXL18       |    | Homo sapiens FLJ11467; FLJ   | 2.0125E-06 | 1.1283E-05 | 1.40927168 |
| STK40       | NM_032017.1 | STK40        | 1  | Homo sapiens Sgk495; SHIK    | 7.5736E-05 | 0.00019073 | 1.40913204 |
| CALM1       | NM_006888.2 | CALM1        | 14 | Homo sapiens PHKD; CALML     | 1.6073E-08 | 4.2606E-07 | 1.40895393 |
| NES         | NM_006617.1 | NES          | 1  | Homo sapiens FLJ21841; Nbl   | 0.00608414 | 0.00752816 | 1.40856505 |
| FLJ20021    | XM_028217.4 | FLJ20021     | 4  | PREDICTED: Homo sapiens h    | 2.9286E-06 | 1.4948E-05 | 1.40669602 |
| LOC730347   | XM_926614.1 | LOC730347    |    | PREDICTED: Homo sapiens s    | 0.03448315 | 0.03252582 | 1.40655172 |
| TBPL1       | NM_004865.2 | TBPL1        | 6  | Homo sapiens TRF2; STUD; I   | 1.0419E-07 | 1.424E-06  | 1.40561889 |
| IFI30       | NM_006332.3 | IFI30        | 19 | Homo sapiens MGC32056; IF    | 6.1701E-05 | 0.00016102 | 1.40561648 |
| SLC2A8      | NM_014580.3 | SLC2A8       | 9  | Homo sapiens GLUTX1; GLU     | 1.7897E-06 | 1.0379E-05 | 1.40483061 |
| ALS2        | NM_020919.2 | ALS2         | 2  | Homo sapiens MGC87187; IA    | 1.6223E-05 | 5.6062E-05 | 1.40463517 |
| LOC10012982 | XM_00172498 | LOC10012982  | 1  | PREDICTED: Homo sapiens h    | 0.00192732 | 0.00280622 | 1.40386971 |
| ANKRD13D    | XM_945557.1 | ANKRD13D     |    | PREDICTED: Homo sapiens a    | 0.04877064 | 0.04346948 | 1.40336242 |
| GSTP1       | NM_000852.2 | GSTP1        | 11 | Homo sapiens DFN7; GST3; I   | 9.8504E-10 | 9.1944E-08 | 1.40331283 |
| PDRG1       | NM_030815.2 | PDRG1        | 20 | Homo sapiens PDRG; C20orf    | 2.3979E-05 | 7.5871E-05 | 1.4027817  |
| KIAA1715    | NM_030650.1 | KIAA1715     | 2  | Homo sapiens LNP; MGC102     | 0.01052646 | 0.01199158 | 1.40250213 |
| LOC113386   | NM_138781.2 | LOC113386    | 19 | Homo sapiens FLJ44718; FLJ   | 0.00201047 | 0.00290751 | 1.40234176 |
| PPP1R7      | NM_002712.1 | PPP1R7       | 2  | Homo sapiens SDS22           | 0.0001956  | 0.00041284 | 1.40220928 |
| LOC651575   | XM_940750.1 | LOC651575    |    | PREDICTED: Homo sapiens s    | 7.4264E-05 | 0.00018772 | 1.40195614 |
| LRRC39      | NM_144620.1 | LRRC39       | 1  | Homo sapiens MGC14816; D     | 0.04624371 | 0.04158474 | 1.40182176 |
| SPIRE1      | NM_020148.1 | SPIRE1       | 18 | Homo sapiens Spir-1; MGC1    | 1.9923E-06 | 1.1198E-05 | 1.4015719  |
| SLC25A30    | NM_00101087 | SLC25A30     | 13 | Homo sapiens KMCP1           | 0.00175762 | 0.00259532 | 1.40151996 |
| FLNB        | NM_001457.1 | FLNB         | 3  | Homo sapiens FLN1L; filamin  | 1.2308E-07 | 1.5858E-06 | 1.40151724 |
| RPS6KC1     | NM_012424.2 | RPS6KC1      | 1  | Homo sapiens RPK118; hum     | 0.00320204 | 0.0043216  | 1.4013406  |
| C7orf43     | NM_018275.3 | C7ORF43      | 7  | Homo sapiens FLJ10925; DK    | 0.00121315 | 0.00189635 | 1.40131548 |
| PCMTD2      | NM_018257.1 | PCMTD2       | 20 | Homo sapiens FLJ10883; C2    | 9.7045E-05 | 0.00023405 | 1.40128411 |
| PI4KAP2     | NM_199345.2 | PI4KAP2      |    | Homo sapiens FLJ44912; MG    | 5.7166E-08 | 9.3229E-07 | 1.40095986 |
| C12orf52    | NM_032848.1 | C12ORF52     | 12 | Homo sapiens FLJ14827        | 9.9818E-05 | 0.00023949 | 1.40059539 |
| ZNF773      | NM_198542.1 | ZNF773       | 19 | Homo sapiens ZNF419B; MG     | 0.01830758 | 0.01909316 | 1.40053298 |
| MRPL55      | NM_181462.1 | MRPL55       | 1  | Homo sapiens DKFZp686D13     | 3.8317E-05 | 0.00011008 | 1.40008623 |
| MRP63       | NM_024026.4 | MRP63        | 13 | Homo sapiens bMRP63; MGC     | 0.00195282 | 0.00283865 | 1.39999616 |
| CDK2AP2     | NM_005851.3 | CDK2AP2      | 11 | Homo sapiens p14; FLJ1063    | 0.00102667 | 0.0016441  | 1.39929231 |
| PCNX        | NM_014982.1 | PCNX         | 14 | Homo sapiens KIAA0805; PC    | 0.00076419 | 0.00128129 | 1.39926059 |

## 5.0 ACL-Indepen Upreg

|             |             |             |    |                              |            |            |            |
|-------------|-------------|-------------|----|------------------------------|------------|------------|------------|
| IFFO2       | NM_00113626 | IFFO2       | 1  | Homo sapiens intermediate f  | 0.02711683 | 0.02668795 | 1.3991825  |
| GPC4        | NM_001448.2 | GPC4        | X  | Homo sapiens K-glypican      | 2.9483E-05 | 8.8894E-05 | 1.39900328 |
| BRD7P2      | XR_039198.1 | BRD7P2      |    | PREDICTED: Homo sapiens n    | 2.6862E-05 | 8.2757E-05 | 1.39816082 |
| INTS12      | NM_020395.2 | INTS12      | 4  | Homo sapiens PHF22; INT12    | 4.0177E-07 | 3.4972E-06 | 1.39764052 |
| AP1S2       | NM_003916.3 | AP1S2       | X  | Homo sapiens MGC:1902; SI    | 2.4802E-05 | 7.7775E-05 | 1.39709361 |
| FBXO8       | NM_012180.2 | FBXO8       | 4  | Homo sapiens FBS; FBX8; D    | 0.0017315  | 0.00256279 | 1.39688858 |
| SLC5A8      | NM_145913.2 | SLC5A8      | 12 | Homo sapiens SMCT; MGC12     | 0.00759056 | 0.00906487 | 1.3966533  |
| C19orf28    | NM_174883.2 | C19ORF28    | 19 | Homo sapiens MGC20700; P     | 0.02814176 | 0.02751764 | 1.39461203 |
| ECGF1       | NM_001953.2 | ECGF1       | 22 | Homo sapiens TP; PDECGF; t   | 1.7505E-07 | 1.9844E-06 | 1.3936593  |
| C2orf44     | NM_025203.1 | C2ORF44     | 2  | Homo sapiens FLJ21945; PP    | 8.5828E-07 | 5.9671E-06 | 1.39204477 |
| CYB5R4      | NM_016230.2 | CYB5R4      | 6  | Homo sapiens RP4-676J13.1    | 0.00050535 | 0.00090748 | 1.39190573 |
| PRMT6       | NM_018137.1 | PRMT6       | 1  | Homo sapiens PHF10559; HR    | 0.0016506  | 0.0024584  | 1.39184042 |
| TPRG1L      | NM_182752.3 | TPRG1L      | 1  | Homo sapiens RP11-46F15.3    | 1.5187E-08 | 4.1512E-07 | 1.39160598 |
| METRNL      | NM_00100443 | METRNL      |    | PREDICTED: Homo sapiens n    | 5.2536E-05 | 0.00014214 | 1.39092758 |
| CSRP1       | NM_004078.1 | CSRP1       | 1  | Homo sapiens CRP; CRP1; D    | 3.4707E-06 | 1.7022E-05 | 1.39036149 |
| LOC93622    | NM_138699.2 | LOC93622    |    | PREDICTED: Homo sapiens h    | 6.6398E-05 | 0.00017109 | 1.39032153 |
| MFF         | NM_020194.4 | MFF         | 2  | Homo sapiens MGC110913; C    | 2.499E-05  | 7.8226E-05 | 1.39016154 |
| C1orf166    | NM_024544.1 | C1ORF166    | 1  | Homo sapiens MULAN; FLJ12    | 0.00117886 | 0.00185099 | 1.39003667 |
| AP4E1       | NM_007347.3 | AP4E1       | 15 | Homo sapiens DKFZp686L12     | 0.00118858 | 0.00186391 | 1.38937405 |
| ADCK2       | NM_052853.3 | ADCK2       | 7  | Homo sapiens MGC20727; A     | 1.1565E-05 | 4.2689E-05 | 1.38789582 |
| LOC285074   | XM_942146.1 | LOC285074   | 2  | Homo sapiens hypothetical p  | 0.00040235 | 0.00075208 | 1.38776936 |
| ZNF860      | NM_00113767 | ZNF860      | 3  | Homo sapiens zinc finger pro | 0.03872965 | 0.03586806 | 1.38760324 |
| LOC440776   | XM_496483.2 | LOC440776   | 21 | PREDICTED: Homo sapiens h    | 0.02782946 | 0.02726696 | 1.38693846 |
| GNPTG       | NM_032520.3 | GNPTG       | 16 | Homo sapiens GNPTAG; LP25    | 4.8125E-05 | 0.00013233 | 1.38645318 |
| CTGLF7      | XM_00171478 | CTGLF7      | 10 | PREDICTED: Homo sapiens c    | 3.6108E-08 | 6.9629E-07 | 1.38604022 |
| CALU        | NM_001219.2 | CALU        | 7  | Homo sapiens FLJ90608        | 1.2399E-06 | 7.8661E-06 | 1.38580838 |
| C13orf15    | NM_014059.1 | C13ORF15    | 13 | Homo sapiens RGC-32; KIAA    | 7.9729E-05 | 0.00019913 | 1.38568347 |
| MPHOSPH8    | NM_017520.2 | MPHOSPH8    | 13 | Homo sapiens TWA3; FLJ352    | 0.00011707 | 0.00027145 | 1.38513553 |
|             | Hs.27048    | HS.27048    | 12 | Homo sapiens cDNA FLJ3175    | 0.00012879 | 0.00029373 | 1.38417413 |
| CEACAM1     | NM_00102491 | CEACAM1     | 19 | Homo sapiens BGP1; BGPI; E   | 0.01213501 | 0.01350147 | 1.38411467 |
| TSNAX       | NM_005999.2 | TSNAX       | 1  | Homo sapiens TRAX            | 3.6866E-05 | 0.00010697 | 1.38349852 |
| C1orf122    | NM_198446.1 | C1ORF122    | 1  | Homo sapiens ALAASM; FLJ4    | 1.2506E-05 | 4.5456E-05 | 1.38307208 |
| NDUFAF1     | NM_016013.2 | NDUFAF1     | 15 | Homo sapiens CGI65; CGI-6    | 9.0302E-05 | 0.0002207  | 1.38280352 |
|             | Hs.31532    | HS.31532    | X  | Homo sapiens cDNA FLJ2678    | 0.00447722 | 0.00576675 | 1.38247159 |
| CACNA1H     | NM_021098.2 | CACNA1H     | 16 | Homo sapiens CACNA1HB; F     | 0.00050184 | 0.00090284 | 1.38232548 |
| RAB11FIP5   | NM_015470.1 | RAB11FIP5   | 2  | Homo sapiens RIP11; pp75;    | 1.9038E-06 | 1.0882E-05 | 1.38211417 |
| MAMLD1      | NM_005491.1 | MAMLD1      | X  | Homo sapiens CGorf6; F18; C  | 0.00557744 | 0.00698095 | 1.38165922 |
| SPTAN1      | NM_003127.1 | SPTAN1      | 9  | Homo sapiens FLJ44613; (AL   | 1.3935E-05 | 4.9501E-05 | 1.38160003 |
| RAB40B      | NM_006822.1 | RAB40B      | 17 | Homo sapiens FLJ42385; SE    | 3.3846E-07 | 3.1161E-06 | 1.38100709 |
| GMPR        | NM_006877.2 | GMPR        | 6  | Homo sapiens GMPR1           | 0.00264449 | 0.0036661  | 1.38097827 |
| PDCD6IP     | NM_013374.3 | PDCD6IP     | 3  | Homo sapiens MGC17003; A     | 0.00013756 | 0.00030924 | 1.38057063 |
| TIMM22      | NM_013337.2 | TIMM22      | 17 | Homo sapiens TIM22; TEX4     | 7.1282E-06 | 2.9157E-05 | 1.38053148 |
| STAT2       | NM_005419.2 | STAT2       | 12 | Homo sapiens ISGF-3; STAT1   | 1.5101E-06 | 9.0998E-06 | 1.38047773 |
| SIGIRR      | NM_021805.1 | SIGIRR      | 11 | Homo sapiens TIR8; MGC110    | 0.01594274 | 0.0169883  | 1.38034238 |
| UBE4A       | NM_004788.2 | UBE4A       | 11 | Homo sapiens UFD2; KIAA01    | 3.5789E-07 | 3.2272E-06 | 1.3800007  |
| DKFZp761P04 | XM_291277.4 | DKFZP761P04 | 8  | PREDICTED: Homo sapiens h    | 0.00054878 | 0.0009747  | 1.37936159 |
| TRIM66      | NM_014818.1 | TRIM66      | 11 | Homo sapiens tripartite moti | 0.00065219 | 0.00112005 | 1.37929398 |
| MFSD11      | NM_024311.2 | MFSD11      | 17 | Homo sapiens ET; FLJ22196;   | 0.00024207 | 0.00049255 | 1.37929008 |
| ITGA5       | NM_002205.2 | ITGA5       | 12 | Homo sapiens CD49e; VLA5A    | 6.8956E-05 | 0.00017655 | 1.37918466 |
| USP9X       | NM_004652.3 | USP9X       | X  | Homo sapiens DFFRX; FAF      | 0.00011356 | 0.00026478 | 1.37881802 |
| CAMSAP1L1   | NM_203459.1 | CAMSAP1L1   | 1  | Homo sapiens KIAA1078; MC    | 0.00080877 | 0.00134474 | 1.37817173 |
| PCSK7       | NM_004716.2 | PCSK7       | 11 | Homo sapiens SPC7; PC8; LF   | 0.00010557 | 0.00025082 | 1.37749854 |
| THADA       | NM_022065.3 | THADA       | 2  | Homo sapiens GITA; FLJ4401   | 0.00879533 | 0.0102976  | 1.37614112 |
| FAM160A2    | NM_032127.1 | FAM160A2    | 11 | Homo sapiens KIAA1759; FL    | 0.0092985  | 0.01079595 | 1.37607133 |
| HCFC1R1     | NM_00100201 | HCFC1R1     | 16 | Homo sapiens MGC99622; H     | 1.7739E-07 | 2.0056E-06 | 1.37591716 |
| FERMT2      | NM_006832.1 | FERMT2      | 14 | Homo sapiens KIND2; FLJ44    | 6.5345E-06 | 2.738E-05  | 1.37563893 |
| TIMP1       | NM_003254.2 | TIMP1       | X  | Homo sapiens TIMP; FLJ903;   | 1.6405E-09 | 1.1515E-07 | 1.37525321 |
| REEP3       | NM_00100133 | REEP3       | 10 | Homo sapiens C10orf74        | 0.00891668 | 0.0104216  | 1.37440669 |
| RGS17       | NM_012419.4 | RGS17       | 6  | Homo sapiens RGS-17; hRGS    | 0.01194609 | 0.01332337 | 1.37388713 |
| SLC30A7     | NM_133496.3 | SLC30A7     | 1  | Homo sapiens ZnT-7; ZNT7;    | 2.7471E-06 | 1.4228E-05 | 1.37371062 |
| SAP130      | NM_024545.2 | SAP130      | 2  | Homo sapiens FLJ12761        | 2.1166E-06 | 1.1687E-05 | 1.37360862 |
| TPST1       | NM_003596.2 | TPST1       | 7  | Homo sapiens tyrosylprotein  | 0.00033725 | 0.00064849 | 1.37349551 |
| AKTIP       | NM_022476.2 | AKTIP       | 16 | Homo sapiens FTS; FT1        | 6.9265E-07 | 5.1415E-06 | 1.37336884 |
| MGMT        | NM_002412.2 | MGMT        | 10 | Homo sapiens O-6-methylgu    | 0.00022163 | 0.00045615 | 1.37312678 |
| RRAS        | NM_006270.2 | RRAS        | 19 | Homo sapiens related RAS vi  | 8.872E-08  | 1.2616E-06 | 1.37219931 |
| EIF2B3      | NM_020365.2 | EIF2B3      | 1  | Homo sapiens EIF-2B; EIF2B   | 0.00022758 | 0.00046676 | 1.37215062 |
| LOC10013027 | XM_00172279 | LOC10013027 | 16 | PREDICTED: Homo sapiens h    | 0.00657968 | 0.00803481 | 1.37209675 |
| NUAK1       | NM_014840.2 | NUAK1       | 12 | Homo sapiens KIAA0537; AR    | 0.00025225 | 0.00050938 | 1.37196999 |
| FGFRL1      | NM_00100435 | FGFRL1      | 4  | Homo sapiens FGFR5; FHFR     | 6.3585E-06 | 2.6758E-05 | 1.37168804 |
| LOC440957   | NM_00112476 | LOC440957   | 3  | Homo sapiens similar to CG3  | 4.4643E-06 | 2.0594E-05 | 1.37167866 |

## 5.0 ACL-Indepen Upreg

|            |             |            |    |                              |            |            |            |
|------------|-------------|------------|----|------------------------------|------------|------------|------------|
| ALG6       | NM_013339.2 | ALG6       | 1  | Homo sapiens asparagine-lin  | 1.9537E-05 | 6.4833E-05 | 1.37126186 |
| LEP        | NM_000230.1 | LEP        | 7  | Homo sapiens OB; OBS         | 0.0001165  | 0.00027049 | 1.37105168 |
| DFNA5      | NM_004403.1 | DFNA5      | 7  | Homo sapiens ICERE-1         | 6.0616E-05 | 0.00015904 | 1.37075441 |
| ACY1       | NM_000666.1 | ACY1       | 3  | Homo sapiens ACY1D; ACYL     | 0.00216617 | 0.00310251 | 1.37051595 |
| MLLT6      | NM_005937.2 | MLLT6      | 17 | Homo sapiens AF17; FLJ234    | 7.3792E-05 | 0.00018685 | 1.37050181 |
| GRN        | NM_002087.2 | GRN        | 17 | Homo sapiens PEPI; PGRN; P   | 1.0031E-05 | 3.8116E-05 | 1.37020472 |
| PINK1      | NM_032409.1 | PINK1      | 1  | Homo sapiens FLJ27236; PA    | 4.7371E-05 | 0.00013066 | 1.37005935 |
| FTSJ3      | NM_017647.2 | FTSJ3      | 17 | Homo sapiens FLJ20062; EP    | 0.00064133 | 0.00110572 | 1.36972392 |
| LOC642236  | XM_942974.1 | LOC642236  |    | PREDICTED: Homo sapiens s    | 0.000317   | 0.00061535 | 1.36920275 |
| TCTN3      | NM_015631.4 | TCTN3      |    | Homo sapiens tectonic family | 0.00140596 | 0.00215024 | 1.36890603 |
| ASAP1      | NM_018482.2 | ASAP1      | 8  | Homo sapiens ZG14P; AMAP     | 5.4335E-07 | 4.3458E-06 | 1.3682014  |
| PQLC3      | NM_152391.2 | PQLC3      | 2  | Homo sapiens ACY1D; MGC      | 1.4087E-06 | 8.6555E-06 | 1.36795629 |
| ZCCHC17    | NM_016505.2 | ZCCHC17    | 1  | Homo sapiens pNO40; PS1D;    | 4.6405E-07 | 3.8703E-06 | 1.36794413 |
| MRPL28     | NM_006428.3 | MRPL28     | 16 | Homo sapiens MGC8499; MA     | 0.02567488 | 0.02550627 | 1.36774998 |
| RNF20      | NM_019592.5 | RNF20      | 9  | Homo sapiens BRE1A; MGC1     | 3.869E-07  | 3.3913E-06 | 1.36772545 |
| CCDC3      | NM_031455.2 | CCDC3      | 10 | Homo sapiens FLJ20925; DK    | 0.01404718 | 0.0152556  | 1.36769506 |
| CSRP2      | NM_001321.1 | CSRP2      | 12 | Homo sapiens CRP2; LMO5; ;   | 1.2209E-06 | 7.7796E-06 | 1.3675823  |
| SPATA2L    | NM_152339.2 | SPATA2L    | 16 | Homo sapiens MGC26885; C     | 6.3446E-07 | 4.8364E-06 | 1.36699699 |
| FAM89B     | NM_152832.1 | FAM89B     | 11 | Homo sapiens MTRV1           | 6.1194E-07 | 4.7056E-06 | 1.3669349  |
| dJ341D10.1 | NM_00100753 | dJ341D10.1 |    | Homo sapiens dJ341D10.1 (r   | 0.0036357  | 0.00482232 | 1.36586772 |
| OCEL1      | NM_024578.1 | OCEL1      | 19 | Homo sapiens S863-9; FLJ22   | 5.3624E-06 | 2.3466E-05 | 1.3657295  |
| CCBL1      | NM_004059.3 | CCBL1      | 9  | Homo sapiens GTK; MGC296     | 0.00445344 | 0.00573866 | 1.36549266 |
|            | Hs.213541   | HS.213541  |    |                              |            |            |            |
| HES1       | NM_005524.2 | HES1       | 12 | Homo sapiens cDNA FLJ3208    | 9.4555E-07 | 6.4312E-06 | 1.36534589 |
| OSTF1      | NM_012383.3 | OSTF1      | 3  | Homo sapiens HHL; FLJ2040;   | 0.00094868 | 0.00153801 | 1.36534045 |
| PIK4CA     | NM_058004.1 | PIK4CA     | 9  | Homo sapiens BA235O14.1; ;   | 1.8333E-06 | 1.0555E-05 | 1.36516001 |
| CYP27B1    | NM_000785.3 | CYP27B1    | 22 | Homo sapiens pi4K230; FLJ1   | 4.4361E-06 | 2.0475E-05 | 1.36463033 |
| FLNC       | NM_001458.2 | FLNC       | 12 | Homo sapiens VDR; VDDR;      | 0.00014269 | 0.00031882 | 1.36424447 |
| RTN4IP1    | NM_032730.3 | RTN4IP1    | 7  | Homo sapiens FLN2; ABPL; A   | 3.492E-07  | 3.175E-06  | 1.36374452 |
| PCYOX1     | NM_016297.2 | PCYOX1     | 6  | Homo sapiens NMP; MGC12'     | 7.8998E-06 | 3.1578E-05 | 1.36268675 |
| BPHL       | NM_004332.1 | BPHL       | 2  | Homo sapiens KIAA0908; PC    | 3.8871E-05 | 0.00011131 | 1.36215859 |
| TTC37      | NM_014639.2 | TTC37      | 6  | Homo sapiens MGC125930; I    | 0.00064276 | 0.00110776 | 1.3618137  |
| AMY1B      | NM_00100821 | AMY1B      | 5  | Homo sapiens MGC32587; T     | 0.00034742 | 0.00066425 | 1.36154985 |
| RPL28      | NM_000991.3 | RPL28      | 1  | Homo sapiens AMY1            | 0.02511892 | 0.02508176 | 1.3609972  |
| LOC728105  | XR_015328.2 | LOC728105  | 19 | Homo sapiens FLJ43307        | 0.00382127 | 0.00504329 | 1.35981999 |
| H1FX       | NM_006026.2 | H1FX       | 3  | PREDICTED: Homo sapiens n    | 0.00165601 | 0.00246519 | 1.35969829 |
| UBTD1      | NM_024954.3 | UBTD1      | 3  | Homo sapiens MGC8350; H1     | 8.6045E-06 | 3.3719E-05 | 1.35931385 |
| LRPAP1     | NM_002337.1 | LRPAP1     | 10 | Homo sapiens FLJ11807        | 0.00015523 | 0.00034194 | 1.35911076 |
| LOC650832  | XM_939919.1 | LOC650832  | 4  | Homo sapiens MGC138272; ;    | 1.0342E-06 | 6.8689E-06 | 1.3590476  |
|            | XM_939919.1 | LOC650832  |    | PREDICTED: Homo sapiens s    | 0.00014442 | 0.00032161 | 1.35879133 |
|            | Hs.481659   | HS.481659  |    |                              |            |            |            |
| ELAVL1     | NM_001419.2 | ELAVL1     | 5  | Homo sapiens cDNA FLJ2719    | 0.00985209 | 0.01133074 | 1.35830343 |
| TMEM55B    | NM_144568.1 | TMEM55B    | 19 | Homo sapiens MELG; HUR; E    | 0.00023968 | 0.0004885  | 1.35739122 |
| FAR1       | NM_032228.4 | FAR1       | 14 | Homo sapiens DKFZp434M05     | 1.2871E-05 | 4.6453E-05 | 1.35705661 |
| TTC15      | NM_016030.5 | TTC15      | 11 | Homo sapiens FLJ33561; FA    | 0.00034237 | 0.00065666 | 1.35684764 |
| CLP1       | NM_006831.1 | CLP1       | 2  | Homo sapiens FLJ36862; CG    | 0.00060628 | 0.00105608 | 1.35628626 |
| GOLSYN     | NM_017786.2 | GOLSYN     | 11 | Homo sapiens HEAB; hClp1     | 1.9895E-05 | 6.5649E-05 | 1.35602215 |
| VPS8       | NM_015303.3 | VPS8       | 8  | Homo sapiens FLJ20366; SY    | 1.4648E-05 | 5.1594E-05 | 1.3557924  |
| PLCG2      | NM_002661.1 | PLCG2      | 3  | Homo sapiens KIAA0804; FL    | 0.00040132 | 0.00075078 | 1.35560792 |
| GPC2       | NM_152742.1 | GPC2       | 16 | Homo sapiens phospholipase   | 3.5683E-07 | 3.2244E-06 | 1.35551072 |
| EXTL2      | NM_00103302 | EXTL2      | 7  | Homo sapiens FLJ38962; DK    | 0.00137281 | 0.00210504 | 1.35532805 |
| AGRN       | NM_198576.2 | AGRN       | 1  | Homo sapiens EXTR2           | 0.00035851 | 0.00068234 | 1.35454252 |
| FUK        | NM_145059.2 | FUK        | 1  | Homo sapiens FLJ45064        | 0.00019211 | 0.00040754 | 1.35443183 |
| GPC1       | NM_002081.1 | GPC1       | 16 | Homo sapiens 1110046B12R     | 0.00077115 | 0.00129147 | 1.35406036 |
| FAM69B     | XM_942503.1 | FAM69B     | 2  | Homo sapiens glypican; FLJ3  | 0.00268789 | 0.00371511 | 1.35337827 |
| LOC648852  | XM_940430.1 | LOC648852  |    | PREDICTED: Homo sapiens fi   | 0.00047556 | 0.00086406 | 1.35320048 |
|            | XM_940430.1 | LOC648852  |    | PREDICTED: Homo sapiens h    | 2.9998E-05 | 9.0075E-05 | 1.35260518 |
| RNF123     | NM_022064.2 | RNF123     | 3  | Homo sapiens KPC1; DKFZp     | 6.6862E-06 | 2.7869E-05 | 1.35231269 |
| GMCL1      | NM_178439.3 | GMCL1      | 2  | Homo sapiens GCL1; BTBD1     | 0.00230832 | 0.00327563 | 1.35184377 |
| ZNF622     | NM_033414.2 | ZNF622     | 5  | Homo sapiens MGC17552; Z     | 2.0115E-06 | 1.1284E-05 | 1.35150156 |
| EIF4G3     | NM_003760.2 | EIF4G3     | 1  | Homo sapiens eIF4GII         | 0.00016114 | 0.00035266 | 1.35113479 |
| DNAJB2     | NM_006736.5 | DNAJB2     | 2  | Homo sapiens HSPF3; HSJ1     | 2.3565E-05 | 7.4885E-05 | 1.3511255  |
| CPE        | NM_001873.1 | CPE        | 4  | Homo sapiens carboxypeptid   | 0.00015788 | 0.00034675 | 1.35091123 |
| CHRNA5     | NM_000745.2 | CHRNA5     | 15 | Homo sapiens cholinergic rec | 0.00086905 | 0.0014263  | 1.35005329 |
| AARS2      | NM_020745.1 | AARS2      | 6  | Homo sapiens KIAA1270; AA    | 0.0064436  | 0.00789501 | 1.35005058 |
| RNF40      | NM_014771.2 | RNF40      | 16 | Homo sapiens KIAA0661; DK    | 0.00871186 | 0.01020941 | 1.34970772 |
| ELOF1      | NM_032377.2 | ELOF1      | 19 | Homo sapiens ELF1            | 3.9131E-05 | 0.00011195 | 1.34936176 |
| ABCD3      | NM_002858.2 | ABCD3      | 1  | Homo sapiens ABC43; PXMP     | 0.00492126 | 0.00626511 | 1.34934327 |
| C1orf50    | NM_024097.1 | C1ORF50    | 1  | Homo sapiens MGC955          | 8.6343E-05 | 0.00021334 | 1.34889304 |
| SSTR2      | NM_001050.2 | SSTR2      | 17 | Homo sapiens somatostatin r  | 0.00029203 | 0.00057438 | 1.34808312 |
| ZNF544     | NM_014480.1 | ZNF544     | 19 | Homo sapiens zinc finger pro | 0.00013432 | 0.00030327 | 1.34808091 |
| DCUN1D4    | NM_015115.1 | DCUN1D4    | 4  | Homo sapiens KIAA0276        | 3.0747E-05 | 9.1949E-05 | 1.34792638 |

## 5.0 ACL-Indepen Upreg

|             |                          |   |                                 |            |            |            |
|-------------|--------------------------|---|---------------------------------|------------|------------|------------|
| KIFC2       | NM_145754.2 KIFC2        |   | 8 Homo sapiens kinesin family   | 1.4685E-07 | 1.7675E-06 | 1.34766549 |
| EFNA4       | NM_005227.2 EFNA4        |   | 1 Homo sapiens EFL4; LERK4;     | 0.01103163 | 0.01246992 | 1.34720491 |
| OBFC2A      | NM_022837.1 OBFC2A       |   | 2 Homo sapiens MGC111163; I     | 2.1723E-05 | 7.0151E-05 | 1.34696311 |
| HIF1AN      | NM_017902.1 HIF1AN       |   | 10 Homo sapiens DKFZp762F18     | 0.00021534 | 0.00044561 | 1.34660955 |
| ZBTB17      | NM_003443.1 ZBTB17       |   | 1 Homo sapiens ZNF60; pHZ-6     | 0.00041277 | 0.00076877 | 1.34622058 |
| DENND4C     | NM_017925.4 DENND4C      |   | 9 Homo sapiens C9orf55B; FLJ    | 0.00356608 | 0.00474089 | 1.34591639 |
| TMSB15A     | NM_021992.2 TMSB15A      | X | Homo sapiens Tb15; TMSNB;       | 6.8414E-08 | 1.0513E-06 | 1.34566219 |
| PMVK        | NM_006556.2 PMVK         |   | 1 Homo sapiens PMKASE; HUM      | 0.00321468 | 0.00433665 | 1.34554646 |
|             | Hs.579631 HS.579631      |   | 19 AGENCOURT_10229596 NIH_      | 5.2597E-08 | 8.807E-07  | 1.34548297 |
| SNORA12     | NR_002954.1 SNORA12      |   | 10 Homo sapiens U108            | 1.4327E-08 | 3.9656E-07 | 1.34523248 |
| ANKRD46     | NM_198401.2 ANKRD46      |   | 8 Homo sapiens ankyrin repeat   | 0.00494137 | 0.00628342 | 1.34401847 |
| MTRF1L      | NM_019041.3 MTRF1L       |   | 6 Homo sapiens MGC102748        | 5.8934E-07 | 4.576E-06  | 1.34317107 |
|             | Hs.374278 HS.374278      |   | 16 Homo sapiens cDNA FLJ3838    | 0.00094078 | 0.00152661 | 1.34279151 |
| EXOC2       | NM_018303.4 EXOC2        |   | 6 Homo sapiens Sec5p; FLJ11C    | 0.0002321  | 0.00047503 | 1.34271851 |
| SYVN1       | NM_032431.2 SYVN1        |   | 11 Homo sapiens KIAA1810; MC    | 9.9842E-05 | 0.00023948 | 1.34258189 |
| KIAA0090    | NM_015047.1 KIAA0090     |   | 1 Homo sapiens RP1-43E13.1      | 2.0287E-05 | 6.6591E-05 | 1.34205474 |
| ACAA2       | NM_006111.1 ACAA2        |   | 18 Homo sapiens DSAEC           | 0.01524694 | 0.01636011 | 1.34159675 |
| ZFH3        | NM_006885.2 ZFH3         |   | 16 Homo sapiens ATBF1; ZFH3     | 0.00280007 | 0.00384472 | 1.34127594 |
| ZNF577      | NM_032679.1 ZNF577       |   | 19 Homo sapiens MGC4400         | 0.02894351 | 0.02814166 | 1.34125677 |
| HSPC171     | NM_014187.1 HSPC171      |   | Homo sapiens HSPC171 prot:      | 4.6969E-06 | 2.143E-05  | 1.34122875 |
| CREG1       | NM_003851.2 CREG1        |   | 1 Homo sapiens CREG             | 1.0508E-06 | 6.9581E-06 | 1.34067435 |
| JAK1        | NM_002227.1 JAK1         |   | 1 Homo sapiens JAK1B; JAK1A     | 0.05196265 | 0.04574757 | 1.34065769 |
| CCDC50      | NM_174908.2 CCDC50       |   | 3 Homo sapiens C3orf6; DFNA     | 2.5597E-05 | 7.9643E-05 | 1.34059564 |
| DAGLB       | NM_139179.1 DAGLB        |   | 7 Homo sapiens FLJ33624; DA     | 0.00035576 | 0.00067739 | 1.34044721 |
| ASMTL       | XM_942506.1 ASMTL        |   | PREDICTED: Homo sapiens a       | 3.8891E-05 | 0.00011133 | 1.34030881 |
| C3orf10     | NM_018462.4 C3ORF10      |   | 3 Homo sapiens MDS027; HSP      | 4.6312E-07 | 3.8662E-06 | 1.34005476 |
| MRPS31      | NM_005830.2 MRPS31       |   | 13 Homo sapiens MRP-S31; IMC    | 6.5345E-06 | 2.7367E-05 | 1.33961793 |
| FLJ10213    | NM_018029.3 FLJ10213     |   | 3 Homo sapiens hypothetical p   | 0.00322859 | 0.00435207 | 1.33947221 |
| WDR70       | NM_018034.2 WDR70        |   | 5 Homo sapiens FLJ10233         | 5.2309E-06 | 2.3121E-05 | 1.33888458 |
| PRKAG1      | NM_002733.3 PRKAG1       |   | 12 Homo sapiens AMPKG; MGCE     | 0.00043047 | 0.00079481 | 1.33864563 |
| LOC552889   | NM_00113626 LOC552889    |   | 12 Homo sapiens hypothetical p  | 0.00037791 | 0.00071415 | 1.33859017 |
| LOC10013410 | XM_00171397 LOC100134108 |   | PREDICTED: Homo sapiens s       | 2.3746E-05 | 7.5297E-05 | 1.33850908 |
| TGIF2       | NM_021809.4 TGIF2        |   | 20 Homo sapiens TGFB-induced    | 0.04110595 | 0.03765149 | 1.33824906 |
| ATG10       | NM_031482.3 ATG10        |   | 5 Homo sapiens APG10; DKFZF     | 0.00501917 | 0.00637126 | 1.3369392  |
| FTSJD2      | NM_015050.2 FTSJD2       |   | 6 Homo sapiens FtsJ methyltra   | 0.00467814 | 0.00599036 | 1.33678404 |
| TUBB2A      | TUBB TUBB2A              |   | 6 Homo sapiens TUBB; TUBB2;     | 3.1566E-06 | 1.5763E-05 | 1.33657119 |
| SLC9A3R1    | NM_004252.1 SLC9A3R1     |   | 17 Homo sapiens NHERF1; NHEI    | 4.1056E-08 | 7.5047E-07 | 1.33602687 |
| ZZEF1       | NM_015113.3 ZZEF1        |   | 17 Homo sapiens FLJ10821; ZZ    | 0.00431335 | 0.00558355 | 1.33583827 |
| LOC647389   | XM_936461.1 LOC647389    |   | PREDICTED: Homo sapiens h       | 0.04574214 | 0.04123513 | 1.33548199 |
| EHBP1L1     | NM_00109940 EHBP1L1      |   | 11 Homo sapiens FLJ35431; TA    | 4.6324E-05 | 0.0001283  | 1.33451568 |
| CBARA1      | NM_006077.1 CBARA1       |   | 10 Homo sapiens CALC; EFHA3;    | 0.00112159 | 0.00177439 | 1.33438493 |
| SMAP2       | NM_022733.1 SMAP2        |   | 1 Homo sapiens SMAP1L; RP1-     | 4.263E-06  | 1.9895E-05 | 1.33383282 |
| SUB1        | NM_006713.2 SUB1         |   | 5 Homo sapiens P15; p14; MG     | 0.00010201 | 0.0002438  | 1.33353591 |
| ADAM17      | NM_003183.4 ADAM17       |   | 2 Homo sapiens MGC17942; C      | 0.02007597 | 0.02067933 | 1.33268536 |
| ZBTB43      | NM_014007.2 ZBTB43       |   | 9 Homo sapiens ZNF297B; ZBT     | 0.0031261  | 0.00423213 | 1.33266112 |
| FBXO31      | NM_024735.2 FBXO31       |   | 16 Homo sapiens FBX14; Fbx31    | 1.1645E-06 | 7.5017E-06 | 1.33264118 |
| ANTXR1      | NM_032208.1 ANTXR1       |   | 2 Homo sapiens ATR; FLJ2177     | 0.00042556 | 0.00078773 | 1.33204916 |
| CRY2        | NM_021117.1 CRY2         |   | 11 Homo sapiens FLJ10332; PH    | 0.01174889 | 0.01314521 | 1.33192294 |
| EDEM2       | NM_018217.1 EDEM2        |   | 20 Homo sapiens FLJ10783; bA    | 0.00016106 | 0.00035257 | 1.33123473 |
| UGCGL2      | NM_020121.2 UGCGL2       |   | 13 Homo sapiens MGC87276; F     | 0.00070514 | 0.0011946  | 1.33091523 |
| GIPC1       | NM_202468.1 GIPC1        |   | 19 Homo sapiens IIP-1; TIP-2; C | 1.5769E-07 | 1.8646E-06 | 1.33084288 |
| HLA-B       | NM_005514.5 HLA-B        |   | 6 Homo sapiens AS; HLA-B-55     | 1.0984E-06 | 7.1917E-06 | 1.33083146 |
| CRSP9       | NM_004270.3 CRSP9        |   | 5 Homo sapiens CRSP33; MGC      | 0.00158441 | 0.00237309 | 1.33078383 |
| FRS3        | NM_006653.3 FRS3         |   | 6 Homo sapiens MGC17167; F      | 0.00910789 | 0.01061398 | 1.33058532 |
| TMEM9       | NM_016456.2 TMEM9        |   | 1 Homo sapiens TMEM9A           | 3.0336E-05 | 9.0844E-05 | 1.33014135 |
| MTMR10      | NM_017762.1 MTMR10       |   | 15 Homo sapiens FLJ20313        | 0.00010672 | 0.00025274 | 1.32926146 |
| REXO4       | NM_020385.2 REXO4        |   | 9 Homo sapiens XPMC2; XPMC      | 0.00017778 | 0.00038139 | 1.329163   |
| SLC25A14    | NM_022810.1 SLC25A14     | X | Homo sapiens NGC149543; I       | 0.01082652 | 0.01227444 | 1.32914837 |
| MFGE8       | NM_005928.1 MFGE8        |   | 15 Homo sapiens HsT19888; BA    | 8.158E-08  | 1.187E-06  | 1.32826268 |
| C14orf142   | NM_032490.3 C14ORF142    |   | 14 Homo sapiens MGC133207; I    | 0.00275501 | 0.00379414 | 1.32819015 |
| FAHD1       | NM_031208.1 FAHD1        |   | 16 Homo sapiens C16orf36; YIS   | 0.00016517 | 0.00035961 | 1.32808818 |
| FAM40B      | NM_020704.1 FAM40B       |   | 7 Homo sapiens family with sei  | 0.00094259 | 0.00152927 | 1.32801905 |
| PLEKHF1     | NM_024310.2 PLEKHF1      |   | 19 Homo sapiens APPD; ZFYVE1    | 0.02553622 | 0.02540304 | 1.32788148 |
| KIAA1751    | XM_933934.1 KIAA1751     |   | 1 PREDICTED: Homo sapiens K     | 5.6617E-05 | 0.00015085 | 1.32764509 |
| CHMP2A      | NM_198426.1 CHMP2A       |   | 19 Homo sapiens VPS2; VPS2A;    | 2.8009E-06 | 1.4448E-05 | 1.32708132 |
| SNAPC3      | NM_00103969 SNAPC3       |   | 9 Homo sapiens PTFbeta; MGC     | 0.02352936 | 0.02372677 | 1.32693299 |
| PRO1853     | NM_144736.3 PRO1853      |   | 2 Homo sapiens hypothetical p   | 0.0023244  | 0.00329578 | 1.32674337 |
| MUT         | NM_000255.1 MUT          |   | 6 Homo sapiens MCM              | 0.0005025  | 0.00090383 | 1.32630707 |
| SUPT4H1     | NM_003168.1 SUPT4H1      |   | 17 Homo sapiens SPT4H; SUPT4    | 3.6489E-06 | 1.7639E-05 | 1.32542461 |
| RRAGA       | NM_006570.4 RRAGA        |   | 9 Homo sapiens RAGA; FIP-1      | 5.2307E-08 | 8.7752E-07 | 1.32538986 |

## 5.0 ACL-Indepen Upreg

|             |             |             |    |                           |                            |            |            |            |
|-------------|-------------|-------------|----|---------------------------|----------------------------|------------|------------|------------|
| ZKSCAN2     | NM_00101298 | ZKSCAN2     | 16 | Homo sapiens              | ZNF694; ZSC/               | 0.01391318 | 0.01513255 | 1.32520328 |
| GCC1        | NM_024523.5 | GCC1        | 7  | Homo sapiens              | FLJ22035; GC               | 2.691E-05  | 8.2817E-05 | 1.3251082  |
| C10orf61    | NM_015631.2 | C10ORF61    | 10 | Homo sapiens              | DKFZp564D11                | 0.0016826  | 0.00249799 | 1.32414907 |
| TMEM136     | NM_174926.1 | TMEM136     | 11 | Homo sapiens              | MGC17839                   | 0.00018429 | 0.00039266 | 1.32399841 |
| POLR3A      | NM_007055.2 | POLR3A      | 10 | Homo sapiens              | RPC155; hRPC               | 1.965E-05  | 6.5133E-05 | 1.32361966 |
| NUDCD3      | NM_015332.2 | NUDCD3      | 7  | Homo sapiens              | KIAA1068; Nu               | 7.7354E-05 | 0.0001943  | 1.32329922 |
| CCDC84      | NM_198489.1 | CCDC84      | 11 | Homo sapiens              | DLNB14                     | 2.16E-05   | 6.9933E-05 | 1.32312254 |
| C9orf119    | XM_937771.1 | C9ORF119    | 9  | Homo sapiens              | bA395P17.9                 | 0.00037736 | 0.00071326 | 1.32310854 |
| SPHK2       | NM_020126.3 | SPHK2       | 19 | Homo sapiens              | sphingosine ki             | 0.00020814 | 0.0004342  | 1.32255699 |
| CENTG2      | NM_014914.2 | CENTG2      | 2  | Homo sapiens              | GGAP1; MGC7                | 5.4623E-06 | 2.3797E-05 | 1.32231431 |
| ZFC3H1      | NM_144982.3 | ZFC3H1      | 12 | Homo sapiens              | MGC90200; P                | 0.00302413 | 0.00411376 | 1.32211813 |
| C16orf48    | NM_032140.1 | C16ORF48    | 16 | Homo sapiens              | MGC17839; DI               | 8.518E-07  | 5.9646E-06 | 1.32168059 |
| ABCB6       | NM_005689.1 | ABCB6       | 2  | Homo sapiens              | ABC; EST455                | 0.00457103 | 0.00587379 | 1.32119691 |
| TMEM141     | NM_032928.2 | TMEM141     | 9  | Homo sapiens              | MGC14141; R                | 3.1846E-05 | 9.4655E-05 | 1.32089451 |
| ASF1A       | NM_014034.1 | ASF1A       | 6  | Homo sapiens              | DKFZP547E21                | 0.00039981 | 0.0007486  | 1.32069868 |
| UNC84A      | NM_025154.2 | UNC84A      | 7  | Homo sapiens              | KIAA0810; SU               | 3.5863E-06 | 1.7442E-05 | 1.32009883 |
| LAPTM4A     | NM_014713.3 | LAPTM4A     | 2  | Homo sapiens              | LAPTM4; KIAA               | 5.7905E-05 | 0.00015321 | 1.31967541 |
| GPR137      | NM_020155.2 | GPR137      | 11 | Homo sapiens              | GPR137A; TM                | 3.0585E-05 | 9.1494E-05 | 1.31931708 |
| KLK5        | NM_012427.4 | KLK5        | 19 | Homo sapiens              | KLKL2; KLK-L               | 0.00514299 | 0.00650492 | 1.31920279 |
| STX2        | NM_001980.2 | STX2        | 12 | Homo sapiens              | MGC51014; S                | 1.0402E-05 | 3.9239E-05 | 1.31903393 |
| CRY1        | NM_004075.2 | CRY1        | 12 | Homo sapiens              | PHLL1                      | 0.0023079  | 0.00327556 | 1.31892681 |
| RSAD1       | NM_018346.1 | RSAD1       | 17 | Homo sapiens              | FLJ20975; FLJ              | 0.00077333 | 0.00129464 | 1.31857239 |
| C20orf3     | NM_020531.2 | C20ORF3     | 20 | Homo sapiens              | BSCv; APMAP                | 2.3561E-06 | 1.2659E-05 | 1.31838068 |
| MT1E        | NM_175617.2 | MT1E        | 16 | Homo sapiens              | MT1; MTD                   | 2.9395E-07 | 2.8373E-06 | 1.31789857 |
| FAM116A     | NM_152678.1 | FAM116A     |    |                           | PREDICTED: Homo sapiens fi | 0.00049929 | 0.00089862 | 1.3172812  |
| C14orf109   | NM_015676.1 | C14ORF109   | 14 | Homo sapiens              | DKFZP564F11                | 5.0213E-05 | 0.00013716 | 1.31709072 |
| SYAP1       | NM_032796.2 | SYAP1       |    |                           | Homo sapiens FLJ14495; DK  | 2.103E-05  | 6.8567E-05 | 1.31694616 |
| RYR2        | NM_014859.4 | RYR2        | 17 | Homo sapiens              | NPC-A-10; KIA              | 5.7486E-05 | 0.00015247 | 1.31689632 |
| IDS         | NM_000202.2 | IDS         |    |                           | Homo sapiens MPS2; SIDS    | 0.05278926 | 0.04634974 | 1.31616966 |
| FLJ40722    | XM_945696.1 | FLJ40722    |    |                           | PREDICTED: Homo sapiens h  | 0.00014199 | 0.00031765 | 1.31604464 |
| TMEM49      | NM_030938.2 | TMEM49      | 17 | Homo sapiens              | VMP1; DKFZP                | 2.3303E-06 | 1.2559E-05 | 1.31563277 |
| ATP6AP2     | NM_005765.2 | ATP6AP2     |    |                           | Homo sapiens ELDF10; APT6  | 1.2149E-06 | 3.5652E-07 | 1.31488183 |
| LRWD1       | NM_152892.1 | LRWD1       | 7  | Homo sapiens              | DKFZp434K18                | 5.5095E-06 | 2.3979E-05 | 1.31472186 |
| TMEM191A    | XR_039958.1 | TMEM191A    | 22 | PREDICTED: Homo sapiens n |                            | 0.01480064 | 0.01594558 | 1.3144907  |
| COL4A5      | NM_033381.1 | COL4A5      |    |                           | Homo sapiens MGC42377; A   | 0.00834002 | 0.00984068 | 1.31445247 |
| ACN9        | NM_020186.1 | ACN9        | 7  | Homo sapiens              | DC11                       | 3.8441E-06 | 1.8381E-05 | 1.31398078 |
| LOC10013453 | XR_039501.1 | LOC10013453 | 7  | PREDICTED: Homo sapiens n |                            | 7.5675E-07 | 5.4693E-06 | 1.31396095 |
| LOC10013413 | XM_00172085 | LOC10013413 |    |                           | PREDICTED: Homo sapiens s  | 8.2552E-08 | 1.1913E-06 | 1.31395352 |
| ATP6V0E2    | NM_145230.1 | ATP6V0E2    | 7  | Homo sapiens              | ATP6V0E2L; C               | 1.0017E-07 | 1.3951E-06 | 1.31373246 |
| BRSK1       | NM_032430.1 | BRSK1       | 19 | Homo sapiens              | KIAA1811; FL               | 9.2902E-05 | 0.00022605 | 1.31308123 |
| LOC10012926 | XM_00172312 | LOC10012926 |    |                           | PREDICTED: Homo sapiens h  | 0.00998821 | 0.01145876 | 1.31275575 |
| BICD2       | NM_00100380 | BICD2       | 9  | Homo sapiens              | bA526D8.1; K               | 0.00220344 | 0.00314818 | 1.31258276 |
| BTG1        | NM_001731.1 | BTG1        | 12 | Homo sapiens              | B-cell transloc            | 2.1249E-07 | 2.2544E-06 | 1.31236048 |
| CYB5D2      | NM_144611.2 | CYB5D2      | 17 | Homo sapiens              | MGC32124                   | 0.00066542 | 0.00113898 | 1.31220196 |
| SCO2        | NM_005138.1 | SCO2        | 22 | Homo sapiens              | MGC125823; I               | 5.4054E-06 | 2.3596E-05 | 1.31199141 |
| CTBS        | NM_004388.1 | CTBS        | 1  | Homo sapiens              | CTB                        | 0.03449995 | 0.03253816 | 1.31199138 |
| LHPP        | NM_022126.2 | LHPP        | 10 | Homo sapiens              | MGC142189; I               | 1.7665E-06 | 1.0292E-05 | 1.31187728 |
| GUSBL1      | NM_00103352 | GUSBL1      | 6  | Homo sapiens              | bA239L20.5; t              | 0.00078469 | 0.0013109  | 1.31166104 |
| ZNF277      | NM_021994.1 | ZNF277      | 7  | Homo sapiens              | ZNF277P; ZNF               | 7.2356E-06 | 2.9446E-05 | 1.31103958 |
| LOC10013405 | XM_00171709 | LOC10013405 |    |                           | PREDICTED: Homo sapiens s  | 0.00060376 | 0.00105232 | 1.31015419 |
| LOC649679   | XM_945046.1 | LOC649679   |    |                           | PREDICTED: Homo sapiens s  | 0.00586243 | 0.00728363 | 1.3101495  |
| CA2         | NM_000067.1 | CA2         | 8  | Homo sapiens              | Car2; CA-II; C             | 3.8567E-07 | 3.3907E-06 | 1.31012469 |
| ISG20L2     | NM_030980.1 | ISG20L2     | 1  | Homo sapiens              | FLJ12671                   | 0.00903907 | 0.01053937 | 1.30887548 |
| SH3PXD2A    | NM_014631.2 | SH3PXD2A    | 10 | Homo sapiens              | SH3MD1; FIS                | 0.00150872 | 0.002278   | 1.30880628 |
| MAP3K1      | XM_042066.1 | MAP3K1      | 5  | Homo sapiens              | MAPKKK1; ME                | 0.00134855 | 0.00207363 | 1.30832951 |
| PGM3        | NM_015599.1 | PGM3        | 6  | Homo sapiens              | AGM1; PAGM;                | 0.00023415 | 0.00047856 | 1.30828824 |
| PFAAP5      | NM_014887.1 | PFAAP5      | 13 | Homo sapiens              | 92M18.3; CG                | 7.0385E-05 | 0.00017963 | 1.307884   |
| ETS1        | NM_005238.2 | ETS1        | 11 | Homo sapiens              | FLJ10768; ET               | 0.0003022  | 0.00059172 | 1.30714563 |
| TMEM98      | NM_015544.2 | TMEM98      | 17 | Homo sapiens              | DKFZP564K19                | 6.992E-05  | 0.0001787  | 1.30706566 |
| CRIP1       | NM_014171.3 | CRIP1       | 2  | Homo sapiens              | HSPC139                    | 2.6051E-06 | 1.3703E-05 | 1.30665929 |
| FAM73A      | NM_198549.1 | FAM73A      | 1  | Homo sapiens              | FLJ35093; DK               | 0.00308013 | 0.00418021 | 1.30663965 |
| PCOLCE2     | NM_013363.2 | PCOLCE2     | 3  | Homo sapiens              | PCPE2                      | 0.01721598 | 0.01816632 | 1.30646721 |
| ITGA2       | NM_002203.2 | ITGA2       | 5  | Homo sapiens              | CD49B; VLA                 | 0.00305821 | 0.00415368 | 1.30555723 |
| SLC22A23    | NM_015482.1 | SLC22A23    | 6  | Homo sapiens              | solute carrier l           | 0.05690079 | 0.04943534 | 1.30551856 |
| LOC728153   | XM_926814.1 | LOC728153   | 5  | PREDICTED: Homo sapiens s |                            | 0.00094426 | 0.00153141 | 1.30548532 |
| ACTA2       | NM_001613.1 | ACTA2       | 10 | Homo sapiens              | ACTSA                      | 0.00156032 | 0.00234302 | 1.30430655 |
| NKIRAS1     | NM_020345.3 | NKIRAS1     | 3  | Homo sapiens              | KBRAS1; kapp               | 7.2233E-06 | 2.9423E-05 | 1.3036889  |
| FOXO4       | NM_005938.1 | FOXO4       |    |                           | Homo sapiens AFX1; AFX; FC | 0.01264908 | 0.01397595 | 1.30367834 |
| CNOT8       | NM_004779.4 | CNOT8       | 5  | Homo sapiens              | hCAF1; POP2;               | 0.00398334 | 0.00523123 | 1.30358693 |
| PIGC        | NM_153747.1 | PIGC        | 1  | Homo sapiens              | GPI2; MGC20                | 0.00131365 | 0.0020285  | 1.30319588 |

## 5.0 ACL-Indepen Upreg

|           |                       |                                |            |            |            |
|-----------|-----------------------|--------------------------------|------------|------------|------------|
| DCUN1D3   | NM_173475.1 DCUN1D3   | 16 Homo sapiens MGC48972; FI   | 8.2726E-05 | 0.00020556 | 1.30292117 |
| ORAOV1    | NM_153451.2 ORAOV1    | 11 Homo sapiens TAOS1          | 0.01152905 | 0.0129405  | 1.30278622 |
| IQCG      | NM_032263.2 IQCG      | 3 Homo sapiens DKFZp434B22     | 0.03827463 | 0.03552916 | 1.30262647 |
| MCFD2     | NM_139279.3 MCFD2     | 2 Homo sapiens DKFZp686G21     | 0.00458054 | 0.00588429 | 1.30226566 |
| UROS      | NM_000375.1 UROS      | 10 Homo sapiens uroporphyrino  | 7.0558E-07 | 5.1936E-06 | 1.30219743 |
| RNF113A   | NM_006978.1 RNF113A   | Homo sapiens ZNF183; RNF1      | 0.00802884 | 0.00951703 | 1.30208338 |
| MANBA     | NM_005908.2 MANBA     | 4 Homo sapiens MANB1           | 0.00011102 | 0.00026039 | 1.30190797 |
| ANKRD9    | NM_152326.2 ANKRD9    | 14 Homo sapiens MGC21990       | 0.00012013 | 0.00027693 | 1.30146168 |
| CRABP2    | NM_001878.2 CRABP2    | 1 Homo sapiens CRABP-II; RBF   | 6.5759E-08 | 1.0303E-06 | 1.30129429 |
| MINPP1    | NM_004897.2 MINPP1    | 10 Homo sapiens MIPP; HIPER1   | 0.00017176 | 0.00037129 | 1.30093205 |
| CNO       | NM_018366.2 CNO       | 4 Homo sapiens FLJ11230        | 0.00082635 | 0.00136954 | 1.30083659 |
| PROS1     | NM_000313.1 PROS1     | 3 Homo sapiens PROS; protein   | 0.01016664 | 0.01163455 | 1.30050751 |
| PITPNB    | NM_012399.3 PITPNB    | 22 Homo sapiens PI-TP-beta; VI | 0.00117783 | 0.00185004 | 1.30040065 |
| SNAPC2    | NM_003083.1 SNAPC2    | 19 Homo sapiens PTFdelta; SNA  | 8.3606E-05 | 0.00020734 | 1.30013376 |
| C14orf179 | NM_052873.1 C14ORF179 | 14 Homo sapiens FLJ32173; MG   | 0.00021681 | 0.00044813 | 1.30007365 |
| SSR1      | NM_003144.2 SSR1      | 6 Homo sapiens DKFZp781N23     | 3.36E-06   | 1.6571E-05 | 1.30000688 |
| STX3      | NM_004177.3 STX3      | 11 Homo sapiens STX3A          | 3.2186E-05 | 9.5405E-05 | 1.29997574 |
| RAB31     | NM_006868.2 RAB31     | 18 Homo sapiens Rab22B         | 1.6037E-06 | 9.5653E-06 | 1.29984386 |
|           | Hs.508682 Hs.508682   | AV762101 MDS Homo sapien       | 3.0223E-09 | 1.5507E-07 | 1.29980815 |
| LAMC1     | NM_002293.2 LAMC1     | 1 Homo sapiens LAMB2; MGC8     | 1.6823E-07 | 1.932E-06  | 1.29944141 |
| CKB       | NM_001823.3 CKB       | 14 Homo sapiens B-CK; CKBB     | 2.6164E-08 | 5.768E-07  | 1.29942726 |
| NPDC1     | NM_015392.2 NPDC1     | 9 Homo sapiens CAB-; CAB; DI   | 0.03057804 | 0.02944702 | 1.29942162 |
| SNIP1     | NM_024700.2 SNIP1     | 1 Homo sapiens RP3-423B22.3    | 1.6949E-05 | 5.7978E-05 | 1.29941855 |
| EFNB2     | NM_004093.2 EFNB2     | 13 Homo sapiens MGC126227; I   | 1.1001E-06 | 7.1977E-06 | 1.29918662 |
| DBT       | Hs.444093 DBT         | 1 Homo sapiens BCATE2; MGC'    | 0.00128761 | 0.00199497 | 1.29908824 |
| MTMR11    | NM_006697.1 MTMR11    | 1 Homo sapiens CRA; RP11-21    | 0.00196126 | 0.00284619 | 1.29877341 |
| NUCB2     | NM_005013.1 NUCB2     | 11 Homo sapiens NEFA           | 8.9418E-05 | 0.00021909 | 1.29787765 |
| ARL1      | NM_001177.3 ARL1      | 12 Homo sapiens ARFL1          | 2.0792E-05 | 6.8071E-05 | 1.29740642 |
| C1orf74   | NM_152485.2 C1ORF74   | 1 Homo sapiens FLJ25078        | 0.0191787  | 0.01988113 | 1.2972474  |
| STAM      | NM_003473.2 STAM      | 10 Homo sapiens DKFZp686J23'   | 0.0004139  | 0.00077005 | 1.29637322 |
| GCAT      | NM_014291.2 GCAT      | 22 Homo sapiens MGC23053; KI   | 1.6936E-07 | 1.9348E-06 | 1.29614675 |
| TUBB3     | NM_006086.2 TUBB3     | 16 Homo sapiens TUBB4; MC1R    | 2.5417E-08 | 5.7035E-07 | 1.29560377 |
| DIABLO    | NM_138930.2 DIABLO    | 12 Homo sapiens SMC2; FLJ105   | 3.3627E-07 | 3.109E-06  | 1.2952016  |
| RERE      | NM_012102.3 RERE      | 1 Homo sapiens ARP; ATN1L; A   | 0.01777836 | 0.01864093 | 1.29484981 |
| GXYLT1    | XM_290597.6 GXYLT1    | 12 Homo sapiens FLJ43151       | 0.04816581 | 0.04303532 | 1.29449858 |
| CHD7      | NM_017780.2 CHD7      | 8 Homo sapiens FLJ20361; KIA   | 1.5954E-05 | 5.5307E-05 | 1.2930593  |
| PITPNM1   | NM_004910.1 PITPNM1   | 11 Homo sapiens NIR2; PITPNM   | 1.6875E-06 | 9.9302E-06 | 1.29299511 |
| KIAA0494  | NM_014774.1 KIAA0494  | 1 Homo sapiens RP11-8J9.3      | 7.9628E-05 | 0.00019893 | 1.29247499 |
| LOC641298 | XR_041850.1 LOC641298 | 16 PREDICTED: Homo sapiens n   | 0.00239759 | 0.00338098 | 1.29234519 |
| C10orf137 | NM_015608.2 C10ORF137 | 10 Homo sapiens RP11-383C5.6   | 9.4795E-07 | 6.4376E-06 | 1.29226095 |
| AP1G1     | NM_001128.5 AP1G1     | 16 Homo sapiens MGC18255; AI   | 0.00024239 | 0.00049298 | 1.29215888 |
| STK4      | NM_006282.2 STK4      | 20 Homo sapiens DKFZp686A20    | 4.994E-08  | 8.4426E-07 | 1.29181669 |
| LOC642333 | XM_939884.1 LOC642333 | PREDICTED: Homo sapiens s      | 4.2965E-05 | 0.00012059 | 1.29139693 |
| AKAP11    | NM_016248.2 AKAP11    | 13 Homo sapiens PRKA11; AKAF   | 0.00077582 | 0.00129806 | 1.29091731 |
| LOC730313 | XM_00172025 LOC730313 | 7 PREDICTED: Homo sapiens h    | 0.00240945 | 0.00339388 | 1.29065965 |
| AFF4      | NM_014423.2 AFF4      | 5 Homo sapiens AF5Q31; MGC     | 0.00683354 | 0.00829173 | 1.29045818 |
| CLTC      | NM_004859.2 CLTC      | 17 Homo sapiens CHC17; CLTCL   | 0.00011607 | 0.00026984 | 1.29013342 |
| ANKRD54   | NM_138797.1 ANKRD54   | 22 Homo sapiens ankyrin repeat | 0.00106699 | 0.00170059 | 1.28992126 |
| TP53RK    | NM_033550.3 TP53RK    | 20 Homo sapiens BUD32; PRPK;   | 0.01897561 | 0.01969387 | 1.28966245 |
| LOC441763 | XM_930284.1 LOC441763 | 16 PREDICTED: Homo sapiens h   | 8.6441E-06 | 3.3859E-05 | 1.28962674 |
| CPNE1     | NM_003915.2 CPNE1     | 20 Homo sapiens CPN1; COPN1;   | 1.4313E-06 | 8.7512E-06 | 1.28928113 |
| DDEF2     | NM_003887.1 DDEF2     | 2 Homo sapiens PAG3; Pap-alp   | 0.0014463  | 0.00220119 | 1.28868344 |
| SMAD5     | NM_005903.5 SMAD5     | 5 Homo sapiens Dwfc; DKFZp7    | 2.4046E-05 | 7.5947E-05 | 1.28852835 |
| SEC13     | NM_00113623 SEC13     | 3 Homo sapiens SEC13 homolog   | 8.5639E-07 | 5.9682E-06 | 1.28836655 |
| SEMA3E    | NM_012431.1 SEMA3E    | 7 Homo sapiens SEMAH; coll-5   | 0.00916791 | 0.01067259 | 1.28824744 |
| USP38     | NM_032557.4 USP38     | 4 Homo sapiens HP43.8KD; KL    | 2.8526E-05 | 8.6786E-05 | 1.28812996 |
| PTTG1IP   | NM_004339.2 PTTG1IP   | 21 Homo sapiens C21orf3; C21c  | 7.3562E-07 | 5.3518E-06 | 1.28808438 |
| PEA15     | NM_003768.2 PEA15     | 1 Homo sapiens HUMMAT1H; P     | 8.7778E-07 | 6.0739E-06 | 1.28791902 |
| SLC22A18  | NM_002555.3 SLC22A18  | 11 Homo sapiens IMPT1; ORCTL   | 0.02063096 | 0.02116404 | 1.28726167 |
| OSBPL5    | NM_145638.1 OSBPL5    | 11 Homo sapiens ORP5; FLJ429   | 0.00990863 | 0.01138532 | 1.28704962 |
| TSPYL1    | NM_003309.1 TSPYL1    | 6 Homo sapiens TSPYL           | 1.0127E-06 | 6.7725E-06 | 1.28685292 |
| MXRA7     | NM_00100852 MXRA7     | 17 Homo sapiens TMAP1; PS1TF   | 0.01730874 | 0.01824884 | 1.28673713 |
| AEBP2     | NM_153207.3 AEBP2     | 12 Homo sapiens MGC17922       | 0.01434385 | 0.01553165 | 1.28660294 |
| SH3PXD2B  | NM_00101799 SH3PXD2B  | 5 Homo sapiens HOFI; FLJ208'   | 0.00493313 | 0.00627658 | 1.28643911 |
| ZNF483    | NM_133464.1 ZNF483    | 9 Homo sapiens ZKSCAN16        | 0.02475393 | 0.02478783 | 1.28554379 |
| EXOSC4    | NM_019037.2 EXOSC4    | 8 Homo sapiens Rrp41p; p12A    | 5.4586E-05 | 0.0001466  | 1.28545438 |
| LOC643452 | XM_928241.1 LOC643452 | 6 PREDICTED: Homo sapiens s    | 0.01375791 | 0.01500086 | 1.28516509 |
| SIPA1     | NM_153253.2 SIPA1     | 11 Homo sapiens MGC102688; !   | 0.00011559 | 0.0002688  | 1.28508596 |
| SLC15A4   | NM_145648.1 SLC15A4   | 12 Homo sapiens PHT1; FP1259   | 0.000175   | 0.0003767  | 1.28503912 |
| LUZP1     | NM_033631.2 LUZP1     | 1 Homo sapiens KIAA0601; LU    | 1.7038E-06 | 9.9993E-06 | 1.28490355 |

## 5.0 ACL-Indepen Upreg

|             |             |             |    |              |                             |            |            |            |
|-------------|-------------|-------------|----|--------------|-----------------------------|------------|------------|------------|
| C12orf31    | NM_032338.2 | C12ORF31    | 12 | Homo sapiens | MGC104302; I                | 2.4101E-05 | 7.6037E-05 | 1.28434231 |
| STKB19      | NM_032454.1 | STKB19      | 6  | Homo sapiens | RP1; G11; D6'               | 0.00085852 | 0.0014122  | 1.28401987 |
| C6orf12     | XM_379403.3 | C6ORF12     |    |              | PREDICTED: Homo sapiens c   | 0.05702187 | 0.04951112 | 1.28354596 |
| CLPTM1      | NM_001294.1 | CLPTM1      | 19 | Homo sapiens | cleft lip and pa            | 4.545E-07  | 3.8234E-06 | 1.28309824 |
| SEC11C      | NM_033280.1 | SEC11C      | 18 | Homo sapiens | SPC21; SPCS4                | 6.7364E-08 | 1.0406E-06 | 1.28253031 |
| NR2C1       | NM_003297.1 | NR2C1       | 12 | Homo sapiens | TR2-11; TR2                 | 0.0017883  | 0.00263617 | 1.28236096 |
| PSMD3       | NM_002809.2 | PSMD3       | 17 | Homo sapiens | RPN3; P58; S                | 0.00457939 | 0.00588366 | 1.28219526 |
| LAMP2       | NM_002294.1 | LAMP2       |    |              | Homo sapiens CD107b; LAMF   | 7.3351E-06 | 2.9727E-05 | 1.28211429 |
| RNGTT       | NM_003800.1 | RNGTT       | 6  | Homo sapiens | HCE1; hCAP; C               | 7.7622E-06 | 3.117E-05  | 1.28127296 |
| RB1CC1      | NM_014781.3 | RB1CC1      | 8  | Homo sapiens | FIP200; CC1;                | 0.00012403 | 0.00028473 | 1.28113584 |
| PAQR3       | NM_177453.2 | PAQR3       | 4  | Homo sapiens | RKTG                        | 0.00145523 | 0.00221133 | 1.2798149  |
| SLC39A3     | NM_213568.1 | SLC39A3     | 19 | Homo sapiens | ZIP3                        | 0.00013052 | 0.00029667 | 1.2794971  |
| GDI1        | NM_001493.1 | GDI1        |    |              | Homo sapiens OPHN2; MRX4    | 4.4907E-06 | 2.0683E-05 | 1.27945199 |
| ZBTB40      | NM_014870.2 | ZBTB40      | 1  | Homo sapiens | KIAA0478; MC                | 6.0882E-05 | 0.00015955 | 1.27932423 |
| SPRY2       | NM_005842.2 | SPRY2       | 13 | Homo sapiens | hSPRY2; MGC                 | 0.00366132 | 0.00485043 | 1.27923094 |
|             | Hs.279842   | HS.279842   | 1  | Homo sapiens | HSPC157 prot                | 0.00095741 | 0.00154816 | 1.27840596 |
| C6orf211    | NM_024573.1 | C6ORF211    | 6  | Homo sapiens | FLJ12910; DK                | 0.0532766  | 0.04673554 | 1.27825342 |
| BNIP3L      | NM_004331.2 | BNIP3L      | 8  | Homo sapiens | BNIP3a; NIX                 | 0.00110388 | 0.00174954 | 1.27783249 |
| SGTA        | NM_003021.3 | SGTA        | 19 | Homo sapiens | hSGT; SGT                   | 0.00194159 | 0.00282419 | 1.27722174 |
| BTAF1       | NM_003972.2 | BTAF1       | 10 | Homo sapiens | TAF172; KIAA                | 4.585E-05  | 0.00012735 | 1.27682853 |
| ISCA2       | NM_194279.1 | ISCA2       | 14 | Homo sapiens | HBLD1; ISA2;                | 0.02648377 | 0.02620305 | 1.27679408 |
| HLTF        | NM_003071.2 | HLTF        | 3  | Homo sapiens | ZBU1; SMARC                 | 1.8333E-05 | 6.163E-05  | 1.27663562 |
| MED7        | NM_00110081 | MED7        | 5  | Homo sapiens | CRSP9; CRSP                 | 0.00977318 | 0.01125622 | 1.27592693 |
| SLC38A10    | NM_138570.1 | SLC38A10    | 17 | Homo sapiens | MGC15523; FL                | 0.00156679 | 0.00235153 | 1.27529671 |
| LOC648399   | XM_926857.1 | LOC648399   |    |              | PREDICTED: Homo sapiens s   | 0.00030732 | 0.00060041 | 1.27498881 |
| NXF1        | NM_006362.4 | NXF1        | 11 | Homo sapiens | MEX67; TAP; I               | 0.00018317 | 0.00039085 | 1.27405076 |
| LPCAT3      | NM_005768.5 | LPCAT3      | 12 | Homo sapiens | C3F; OACT5; r               | 8.6848E-06 | 3.3973E-05 | 1.2736647  |
| FAM50A      | NM_004699.1 | FAM50A      |    |              | Homo sapiens DXS9928E; 9F   | 2.0228E-07 | 2.175E-06  | 1.27216368 |
| ITM2C       | NM_00101251 | ITM2C       | 2  | Homo sapiens | E25; ITM3; BF               | 4.1928E-08 | 7.6008E-07 | 1.27184575 |
| ZNF672      | NM_024836.1 | ZNF672      | 1  | Homo sapiens | FLJ22301                    | 0.0032403  | 0.00436518 | 1.27180607 |
| PRKCSH      | NM_00100132 | PRKCSH      | 19 | Homo sapiens | G19P1; AGE-R                | 1.3145E-05 | 4.725E-05  | 1.27172804 |
| SMCR5       | NR_024007.1 | SMCR5       | 17 | Homo sapiens | Smith-Mageni                | 0.00151417 | 0.00228506 | 1.27134733 |
| MAP2K1IP1   | NM_021970.2 | MAP2K1IP1   | 4  | Homo sapiens | MP1                         | 3.8557E-05 | 0.00011055 | 1.27122805 |
|             | Hs.413494   | HS.413494   | 10 | Homo sapiens | cDNA: FLJ213                | 0.00013736 | 0.00030895 | 1.27112322 |
| THEM2       | NM_018473.2 | THEM2       | 6  | Homo sapiens | HTO12; PNAS-                | 6.9205E-06 | 2.8561E-05 | 1.27111178 |
| EPAS1       | NM_001430.3 | EPAS1       | 2  | Homo sapiens | HLF; ECYT4; F               | 0.00141851 | 0.00216377 | 1.2706934  |
| CMC1        | NM_182523.1 | CMC1        | 3  | Homo sapiens | DKFZp779D08                 | 0.00043264 | 0.00079797 | 1.26979668 |
| C6orf129    | NM_138493.1 | C6ORF129    | 6  | Homo sapiens | HSPC265; MG                 | 0.00024428 | 0.0004959  | 1.26954765 |
| CD2BP2      | NM_006110.1 | CD2BP2      | 16 | Homo sapiens | FWP010; LIN1                | 9.621E-07  | 6.5185E-06 | 1.26943791 |
| EVI5        | NM_005665.4 | EVI5        | 1  | Homo sapiens | NB4S                        | 0.00256793 | 0.00357521 | 1.26939489 |
| LSMD1       | NM_032356.3 | LSMD1       | 17 | Homo sapiens | PFAAP2; MGC                 | 3.2132E-06 | 1.5964E-05 | 1.26929539 |
| APPBP2      | NM_006380.2 | APPBP2      | 17 | Homo sapiens | PAT1; KIAA02                | 9.2877E-05 | 0.00022605 | 1.26904744 |
| FIG4        | NM_014845.4 | FIG4        | 6  | Homo sapiens | SAC3; RP1-24                | 0.00638696 | 0.00783327 | 1.26870482 |
| TDP1        | NM_018319.3 | TDP1        | 14 | Homo sapiens | FLJ11090; MG                | 0.00161613 | 0.00241443 | 1.26843251 |
| GOPC        | NM_020399.2 | GOPC        | 6  | Homo sapiens | GOPC1; FIG; C               | 0.00302487 | 0.00411412 | 1.26804253 |
| PPP3CB      | NM_021132.1 | PPP3CB      | 10 | Homo sapiens | CALNA2; CALN                | 0.00167439 | 0.00248707 | 1.26773945 |
| C20orf46    | NM_018354.1 | C20ORF46    | 20 | Homo sapiens | FLJ11190                    | 3.5565E-05 | 0.00010408 | 1.26719141 |
| UBE2D4      | NM_015983.2 | UBE2D4      | 7  | Homo sapiens | HBUCE1                      | 0.00162476 | 0.00242484 | 1.26625109 |
| CHES1       | NM_005197.2 | CHES1       | 14 | Homo sapiens | C14orf116; FC               | 0.00019825 | 0.00041673 | 1.26563783 |
| COMMD9      | NM_014186.1 | COMMD9      |    |              | Homo sapiens SPINL; HS      | 0.00021927 | 0.00045247 | 1.26562856 |
| CTSH        | NM_004390.2 | CTSH        | 15 | Homo sapiens | CPSB; ACC-4;                | 0.00820631 | 0.0097038  | 1.26527363 |
| SPNS1       | NM_032038.1 | SPNS1       | 16 | Homo sapiens | SPINL; FLJ38                | 0.00013481 | 0.00030414 | 1.26501714 |
| C17orf63    | NM_018182.1 | C17ORF63    | 17 | Homo sapiens | FLJ10700                    | 0.01396801 | 0.01518277 | 1.26487214 |
|             | Hs.163752   | HS.163752   | 19 | zr87e09.r1   | NCI_CGAP_GCB1               | 5.1073E-05 | 0.00013908 | 1.26477815 |
| CHSY1       | NM_014918.3 | CHSY1       | 15 | Homo sapiens | CSS1; KIAA09                | 6.3933E-07 | 4.8609E-06 | 1.26468211 |
| LOC92249    | NR_015353.1 | LOC92249    |    |              | Homo sapiens hypothetical L | 0.05236476 | 0.04603692 | 1.26414813 |
| LRRC58      | NM_00109967 | LRRC58      | 3  | Homo sapiens | leucine rich re             | 0.00034575 | 0.00066149 | 1.26414322 |
| RAXL1       | NM_032753.2 | RAXL1       | 19 | Homo sapiens | QRX; MGC156                 | 0.01159385 | 0.0129966  | 1.26356955 |
| PRRC1       | NM_130809.2 | PRRC1       | 5  | Homo sapiens | FLJ32875                    | 6.5306E-05 | 0.00016883 | 1.2634171  |
| FRAP1       | NM_004958.2 | FRAP1       | 1  | Homo sapiens | RAPT1; FLJ44                | 1.125E-05  | 4.1756E-05 | 1.26338066 |
| DUSP6       | NM_001946.2 | DUSP6       | 12 | Homo sapiens | MKP3; PYST1                 | 5.6242E-07 | 4.4497E-06 | 1.26326407 |
| KLF4        | NM_004235.3 | KLF4        | 9  | Homo sapiens | GKLF; EZF                   | 0.00424549 | 0.00551524 | 1.26315793 |
| MICB        | NM_005931.2 | MICB        | 6  | Homo sapiens | PERB11.2                    | 0.000828   | 0.00137151 | 1.26284633 |
| C4orf34     | NM_174921.1 | C4ORF34     | 4  | Homo sapiens | FLJ13289                    | 2.4671E-06 | 1.3135E-05 | 1.26246935 |
| CERK        | NM_182661.1 | CERK        | 22 | Homo sapiens | KIAA1646; dA                | 2.9415E-05 | 8.8751E-05 | 1.26217274 |
| FAM173A     | NM_023933.1 | FAM173A     | 16 | Homo sapiens | MGC2494                     | 3.748E-05  | 0.00010835 | 1.26153651 |
| SND1        | NM_014390.2 | SND1        | 7  | Homo sapiens | TDRD11; p10                 | 3.3229E-05 | 9.8E-05    | 1.26077457 |
| LRP5L       | NM_182492.1 | LRP5L       | 22 | Homo sapiens | DKFZp434O02                 | 0.03385479 | 0.03201573 | 1.26024623 |
| SLC26A6     | NM_134426.2 | SLC26A6     | 3  | Homo sapiens | DKFZp586E14                 | 5.9233E-05 | 0.00015583 | 1.26001228 |
| DKFZp434K19 | NM_00102995 | DKFZP434K19 | 22 | Homo sapiens | hypothetical p              | 0.03930181 | 0.03631361 | 1.2599237  |



## 5.0 ACL-Indepen Upreg

|           |             |           |    |                                       |            |            |            |
|-----------|-------------|-----------|----|---------------------------------------|------------|------------|------------|
| LOC653506 | XM_927769.1 | LOC653506 | 17 | PREDICTED: Homo sapiens s             | 1.4436E-06 | 8.808E-06  | 1.25962328 |
| R3HCC1    | XM_114618.6 | R3HCC1    |    | PREDICTED: Homo sapiens R             | 1.7568E-05 | 5.963E-05  | 1.25955191 |
| RHBDD2    | NM_00104045 | RHBDD2    | 7  | Homo sapiens NPD007; RHBI             | 4.7952E-07 | 3.9579E-06 | 1.25953147 |
| NCOA7     | NM_181782.2 | NCOA7     | 6  | Homo sapiens FLJ45605; dJ1            | 0.0115557  | 0.01296213 | 1.25938088 |
| FAM102B   | NM_00101088 | FAM102B   | 1  | Homo sapiens DKFZp686N01              | 0.0287853  | 0.02799715 | 1.25932611 |
| SENP2     | NM_021627.2 | SENP2     | 3  | Homo sapiens AXAM2; SMT3              | 0.00053664 | 0.00095565 | 1.2590913  |
| RNF114    | NM_018683.3 | RNF114    | 20 | Homo sapiens RNF114                   | 1.2613E-06 | 7.933E-06  | 1.25902058 |
| SSR2      | NM_003145.2 | SSR2      | 1  | Homo sapiens HSD25; DKFZ              | 3.7491E-05 | 0.00010835 | 1.25895712 |
| COQ3      | NM_017421.2 | COQ3      | 6  | Homo sapiens bA9819.1; UG             | 4.8057E-05 | 0.00013218 | 1.25867733 |
| MFAP3     | NM_005927.3 | MFAP3     | 5  | Homo sapiens microfibrillar- $\alpha$ | 0.01858439 | 0.01934046 | 1.25867045 |
| SHROOM4   | NM_020717.2 | SHROOM4   |    | Homo sapiens KIAA1202                 | 0.00132365 | 0.00204143 | 1.25858662 |
| MIF4G     | NM_020679.2 | MIF4G     | 17 | Homo sapiens SLIP1; MIFD;             | 0.00015126 | 0.00033429 | 1.25844602 |
| PPP1R2    | NM_006241.3 | PPP1R2    | 3  | Homo sapiens MGC87148; IF             | 1.0689E-05 | 4.0045E-05 | 1.25808305 |
| TMEM41B   | NM_015012.1 | TMEM41B   | 11 | Homo sapiens MGC33897; KI             | 5.8715E-07 | 4.5671E-06 | 1.25806274 |
| GAK       | NM_005255.1 | GAK       | 4  | Homo sapiens MGC99654; FL             | 0.00041412 | 0.00077031 | 1.25795984 |
| ALG13     | NM_018465.2 | ALG13     |    | Homo sapiens YGL047W; GL              | 0.00027045 | 0.00053795 | 1.25791145 |
| YY1AP1    | NM_139121.1 | YY1AP1    | 1  | Homo sapiens HCCA2; FLJ10             | 0.00066756 | 0.00114153 | 1.25787538 |
| RAB5C     | NM_201434.1 | RAB5C     | 17 | Homo sapiens RAB5CL; RABL             | 0.00052852 | 0.00094309 | 1.25751742 |
| ATP6V1B2  | NM_001693.2 | ATP6V1B2  | 8  | Homo sapiens VATB; VPP3; A            | 1.1245E-07 | 1.504E-06  | 1.2572427  |
| RYBP      | NM_012234.3 | RYBP      | 3  | Homo sapiens DDAF; YEAF1              | 8.4825E-05 | 0.00021006 | 1.25709071 |
| TSC22D2   | NM_014779.2 | TSC22D2   | 3  | Homo sapiens KIAA0669; TIL            | 0.00072358 | 0.00122231 | 1.25619635 |
| ACADVL    | NM_000018.2 | ACADVL    | 17 | Homo sapiens ACAD6; VLCAI             | 3.0151E-06 | 1.5221E-05 | 1.2561946  |
| PQLC1     | NM_025078.3 | PQLC1     | 18 | Homo sapiens FLJ22378                 | 7.1691E-07 | 5.2593E-06 | 1.25547664 |
| PLDN      | NM_012388.2 | PLDN      | 15 | Homo sapiens PA; PALLID               | 0.0002146  | 0.0004445  | 1.25527067 |
| TNNI3     | NM_000363.3 | TNNI3     | 19 | Homo sapiens CMH7; cTnI; T            | 0.04701796 | 0.04215999 | 1.25521852 |
| TRAPPC5   | NM_00104246 | TRAPPC5   | 19 | Homo sapiens MGC52424                 | 2.7404E-05 | 8.4161E-05 | 1.25501967 |
| TMEM199   | NM_152464.1 | TMEM199   | 17 | Homo sapiens MGC45714; C              | 0.02808312 | 0.02747561 | 1.25500712 |
| DDX19A    | NM_018332.3 | DDX19A    | 16 | Homo sapiens DDX19L; FLJ1             | 0.00131659 | 0.00203197 | 1.25481168 |
| SEPX1     | NM_016332.2 | SEPX1     | 16 | Homo sapiens MSRB1; SELR;             | 1.381E-05  | 4.9077E-05 | 1.25476921 |
| SECISBP2  | NM_024077.2 | SECISBP2  | 9  | Homo sapiens DKFZp686C09              | 0.00077231 | 0.00129318 | 1.25475385 |
| SLC25A13  | NM_014251.1 | SLC25A13  | 7  | Homo sapiens CTLN2; ARALA             | 0.00956199 | 0.01104924 | 1.25454759 |
| CTSB      | NM_001908.3 | CTSB      | 8  | Homo sapiens CPSB; APPS               | 0.00182211 | 0.00267612 | 1.25454165 |
| SURF1     | NM_003172.2 | SURF1     | 9  | Homo sapiens surfeit 1 (SUR           | 8.9911E-05 | 0.00022005 | 1.25430276 |
| NDFIP2    | NM_019080.1 | NDFIP2    | 13 | Homo sapiens FLJ25842; N4             | 7.108E-07  | 5.2233E-06 | 1.25399026 |
| DENND5A   | NM_015213.2 | DENND5A   | 11 | Homo sapiens FLJ33829; FLJ            | 4.7278E-05 | 0.00013053 | 1.25393965 |
| DEM1      | NM_022774.1 | DEM1      | 1  | Homo sapiens FLJ21144; FLJ            | 0.0064241  | 0.00787551 | 1.25366265 |
| NAT15     | NM_024845.1 | NAT15     | 16 | Homo sapiens FLJ11693                 | 0.04609149 | 0.04147761 | 1.2536263  |
| C9orf46   | NM_018465.1 | C9ORF46   | 9  | Homo sapiens FLJ39176; FLJ            | 9.0813E-05 | 0.00022164 | 1.25359542 |
| YIF1A     | NM_020470.1 | YIF1A     | 11 | Homo sapiens FinGER7; 54TI            | 6.1366E-05 | 0.00016039 | 1.25331802 |
| STUB1     | NM_005861.2 | STUB1     | 16 | Homo sapiens CHIP; SDCCA              | 4.7086E-06 | 2.1439E-05 | 1.25317478 |
| ANAPC11   | XM_942695.1 | ANAPC11   |    | PREDICTED: Homo sapiens A             | 0.00035614 | 0.00067797 | 1.25281906 |
| OGFR      | NM_007346.2 | OGFR      | 20 | Homo sapiens opioid growth            | 0.00060077 | 0.00104814 | 1.2527879  |
| PPIC      | NM_000943.4 | PPIC      | 5  | Homo sapiens MGC3673; CYI             | 0.00014439 | 0.00032163 | 1.25238831 |
| HES6      | NM_018645.3 | HES6      | 2  | Homo sapiens hairy and enh            | 7.9887E-07 | 5.7033E-06 | 1.25236873 |
| CCND3     | NM_001760.2 | CCND3     | 6  | Homo sapiens cyclin D3 (CCN           | 5.1887E-07 | 4.2076E-06 | 1.25236087 |
| MTIF3     | NM_152912.3 | MTIF3     | 13 | Homo sapiens IF3-3mt; IF3(m           | 5.4486E-05 | 0.00014642 | 1.25215383 |
| CANT1     | NM_138793.2 | CANT1     | 17 | Homo sapiens SHAPY; SCAN-             | 3.5912E-06 | 1.7447E-05 | 1.2520259  |
| C9orf69   | NM_152833.2 | C9ORF69   | 9  | Homo sapiens bA83N9.1                 | 0.00504702 | 0.00640014 | 1.25198396 |
| MLXIPL    | NM_032994.1 | MLXIPL    | 7  | Homo sapiens WS-bHLH; MI              | 0.00050256 | 0.00090376 | 1.25185141 |
| BIRC3     | NM_182962.1 | BIRC3     | 11 | Homo sapiens RNF49; MALT2             | 0.01355457 | 0.01481044 | 1.25155909 |
| C16orf57  | NM_024598.2 | C16ORF57  | 16 | Homo sapiens FLJ13154                 | 3.5937E-06 | 1.7449E-05 | 1.25124283 |
| GOLGA3    | NM_005895.2 | GOLGA3    | 12 | Homo sapiens GCP170; MEA-             | 6.3637E-07 | 4.8468E-06 | 1.25106843 |
| IL10RB    | NM_000628.3 | IL10RB    | 21 | Homo sapiens IL-10R2; CRF2            | 0.00118492 | 0.00185884 | 1.25106233 |
| LIMA1     | NM_016357.3 | LIMA1     | 10 | Homo sapiens SREBP3; EPLII            | 0.00042413 | 0.00078574 | 1.25089004 |
| STAT1     | NM_139266.1 | STAT1     | 2  | Homo sapiens ISGF-3; STAT             | 4.9078E-05 | 0.00013448 | 1.25078606 |
| FRMD8     | NM_031904.3 | FRMD8     | 11 | Homo sapiens MGC31785; FI             | 0.00161359 | 0.00241227 | 1.25045016 |
| PAFAH1B1  | NM_000430.2 | PAFAH1B1  | 3  | Homo sapiens LIS2; PAFAH;             | 3.9419E-06 | 1.8766E-05 | 1.25033496 |
| EIF4E3    | NM_173359.3 | EIF4E3    | 17 | Homo sapiens MGC86971; M              | 0.03601061 | 0.0337561  | 1.24933431 |
| NDRG3     | NM_022477.2 | NDRG3     | 20 | Homo sapiens FLJ13556                 | 7.3461E-05 | 0.00018618 | 1.24902908 |
| DFFA      | NM_004401.2 | DFFA      | 1  | Homo sapiens DFF-45; ICAD.            | 0.00017353 | 0.00037446 | 1.24887274 |
| CTSL2     | NM_001333.2 | CTSL2     | 9  | Homo sapiens CTSV; CATL2;             | 2.1801E-06 | 1.1933E-05 | 1.24878735 |
| CCNH      | NM_001239.2 | CCNH      | 5  | Homo sapiens p34; CAK; p3             | 0.0028189  | 0.00386695 | 1.24871407 |
| LOC648980 | XM_941280.2 | LOC648980 | 22 | PREDICTED: Homo sapiens s             | 0.00625749 | 0.00771546 | 1.24824116 |
| GMPPA     | NM_013335.2 | GMPPA     | 2  | Homo sapiens GDP-mannose              | 4.5947E-05 | 0.00012754 | 1.24803558 |
| PJA2      | NM_014819.2 | PJA2      |    | Homo sapiens KIAA0438; RN             | 2.0177E-06 | 1.1298E-05 | 1.24793128 |
| C7orf26   | NM_024067.2 | C7ORF26   | 7  | Homo sapiens MGC2718                  | 3.0556E-05 | 9.1438E-05 | 1.247874   |
| INO80C    | NM_194281.2 | INO80C    | 18 | Homo sapiens hIes6; FLJ381            | 0.00151158 | 0.00228155 | 1.24780248 |
| BIRC2     | NM_001166.3 | BIRC2     | 11 | Homo sapiens API1; Hiap-2;            | 0.00049248 | 0.00088946 | 1.24768052 |
| CREB3L2   | NM_194071.2 | CREB3L2   | 7  | Homo sapiens MGC131709; I             | 4.7562E-05 | 0.00013098 | 1.24755123 |
| LMO4      | NM_006769.2 | LMO4      | 1  | Homo sapiens LIM domain or            | 7.6373E-06 | 3.0739E-05 | 1.24752685 |

## 5.0 ACL-Indepen Upreg

|             |             |             |    |                               |            |            |            |
|-------------|-------------|-------------|----|-------------------------------|------------|------------|------------|
| LHX2        | NM_004789.3 | LHX2        | 9  | Homo sapiens LH2; hLhx2; N    | 0.00026434 | 0.00052953 | 1.24749839 |
| ATP6V0B     | NM_004047.2 | ATP6V0B     | 1  | Homo sapiens HATPL; ATP6F     | 1.0274E-06 | 6.8397E-06 | 1.24736619 |
| PAC SIN2    | NM_007229.2 | PAC SIN2    | 22 | Homo sapiens SDPII            | 2.8966E-06 | 1.481E-05  | 1.24712679 |
| RAB8B       | NM_016530.2 | RAB8B       | 15 | Homo sapiens FLJ38125         | 0.00696385 | 0.00842073 | 1.2470924  |
| EGR1        | NM_001964.2 | EGR1        | 5  | Homo sapiens GOS30; AT225     | 4.7935E-07 | 3.9603E-06 | 1.24701402 |
| C1orf115    | NM_024709.2 | C1ORF115    | 1  | Homo sapiens FLJ14146; RP     | 0.00021192 | 0.00043988 | 1.24695403 |
| LMOD3       | NM_198271.2 | LMOD3       | 3  | Homo sapiens DKFZp313F01      | 0.00213683 | 0.0030675  | 1.24679721 |
| RWDD2A      | NM_033411.2 | RWDD2A      | 6  | Homo sapiens dj747H23.2; F    | 0.00255277 | 0.00355694 | 1.2465134  |
| ALCAM       | NM_001627.2 | ALCAM       | 3  | Homo sapiens CD166; FLJ38     | 6.0443E-06 | 2.5769E-05 | 1.24640867 |
| MED19       | NM_153450.1 | MED19       | 11 | Homo sapiens LCMR1            | 0.00119493 | 0.00187286 | 1.24624018 |
| C21orf58    | NM_199071.2 | C21ORF58    | 21 | Homo sapiens chromosome 2     | 0.00038649 | 0.00072691 | 1.24602346 |
| LOC10013178 | XR_039574.1 | LOC10013178 | 7  | PREDICTED: Homo sapiens n     | 0.00156797 | 0.00235249 | 1.24588975 |
| RUNX3       | NM_004350.1 | RUNX3       | 1  | Homo sapiens FLJ34510; MG     | 0.00215956 | 0.00309405 | 1.24532427 |
| SLC16A10    | NM_018593.3 | SLC16A10    | 6  | Homo sapiens TAT1; PRO081     | 0.02017144 | 0.02077036 | 1.24530875 |
| ACAD11      | NM_032169.3 | ACAD11      | 3  | Homo sapiens FLJ12592; MG     | 0.0020266  | 0.00292842 | 1.24509755 |
| POP7        | NM_005837.1 | POP7        | 7  | Homo sapiens d610037N12R      | 0.00383285 | 0.00505629 | 1.24449936 |
| F11R        | NM_016946.3 | F11R        | 1  | Homo sapiens JAM; JAM-A; P    | 0.00019777 | 0.00041603 | 1.244442   |
| ZBTB9       | NM_152735.3 | ZBTB9       | 6  | Homo sapiens MGC23166         | 0.00043663 | 0.00080449 | 1.24421066 |
| MOBK L3     | NM_199482.2 | MOBK L3     | 2  | Homo sapiens 2C4D; MGC12      | 0.00129191 | 0.00200021 | 1.24376055 |
| NARF        | NM_00103861 | NARF        | 17 | Homo sapiens FLJ10067; DK     | 0.00016237 | 0.00035484 | 1.24315463 |
| FAM120B     | NM_032448.1 | FAM120B     | 6  | Homo sapiens KIAA1838; dj     | 1.1324E-06 | 7.3543E-06 | 1.24293145 |
| LOC647346   | XM_942836.1 | LOC647346   |    | PREDICTED: Homo sapiens s     | 0.0040014  | 0.00525416 | 1.24287999 |
| SCOC        | NM_032547.1 | SCOC        | 4  | Homo sapiens HRIHFB2072;      | 0.00019073 | 0.00040481 | 1.24282107 |
| SLC30A3     | NM_003459.4 | SLC30A3     | 2  | Homo sapiens ZNT3             | 2.6105E-05 | 8.082E-05  | 1.24273284 |
| SKP1        | NM_006930.3 | SKP1        | 5  | Homo sapiens TCEB1L; MGC      | 0.00742707 | 0.00890234 | 1.24226528 |
| WDR33       | NM_00100662 | WDR33       | 2  | Homo sapiens WDC146; FLJ1     | 0.001301   | 0.00201358 | 1.24218484 |
| HNRNPU      | NM_031844.2 | HNRNPU      | 1  | Homo sapiens SAF-A; U21.1;    | 0.00573772 | 0.00715197 | 1.24205215 |
| CCNC        | NM_00101339 | CCNC        | 6  | Homo sapiens CypC             | 2.7871E-05 | 8.5206E-05 | 1.24110245 |
| LOC389293   | XM_371741.4 | LOC389293   | 5  | PREDICTED: Homo sapiens s     | 0.00556756 | 0.00696958 | 1.24069408 |
| ZNF394      | NM_032164.2 | ZNF394      | 7  | Homo sapiens FLJ12298; ZK     | 0.00070773 | 0.00119854 | 1.24052162 |
| MFSD3       | NM_138431.1 | MFSD3       | 8  | Homo sapiens major facilitat  | 1.8356E-06 | 1.0554E-05 | 1.24006366 |
| MUM1        | NM_032853.2 | MUM1        | 19 | Homo sapiens MGC163315; I     | 1.2654E-05 | 4.586E-05  | 1.24005763 |
| PREP        | NM_002726.3 | PREP        | 6  | Homo sapiens PEP; PE; MGC     | 0.00019387 | 0.00041018 | 1.24002385 |
| CCDC93      | NM_019044.3 | CCDC93      | 2  | Homo sapiens FLJ10996; FLJ    | 0.00010671 | 0.00025277 | 1.23982247 |
| PPHLN1      | NM_201438.1 | PPHLN1      | 12 | Homo sapiens HSPC206; HSF     | 0.00057864 | 0.00101744 | 1.23970905 |
| TMEM185B    | NR_000034.1 | TMEM185B    | 2  | Homo sapiens FLJ20979; FAM    | 0.00353039 | 0.00470754 | 1.23935761 |
| FAM53C      | NM_016605.1 | FAM53C      | 5  | Homo sapiens CS5orf6          | 1.5435E-05 | 5.3763E-05 | 1.23927721 |
| RGMA        | NM_020211.1 | RGMA        | 15 | Homo sapiens RGM              | 0.03778    | 0.03514437 | 1.23893064 |
| GUSB        | NM_000181.1 | GUSB        | 7  | Homo sapiens MPS7; FLJ394     | 6.1452E-05 | 0.00016052 | 1.23869124 |
|             | Hs.436379   | HS.436379   | 2  | full-length cDNA clone CS0DI  | 0.00146481 | 0.00222472 | 1.23842209 |
| WRB         | NM_004627.2 | WRB         | 21 | Homo sapiens CHD5             | 0.00046009 | 0.00083839 | 1.23840319 |
| C20orf111   | NM_016470.6 | C20ORF111   | 20 | Homo sapiens dj1183I21.1;     | 1.0794E-05 | 4.0386E-05 | 1.2382622  |
| STOX2       | NM_020225.1 | STOX2       | 4  | Homo sapiens DKFZp762K22      | 0.01936744 | 0.020046   | 1.23820022 |
| RTN4R       | NM_023004.5 | RTN4R       | 22 | Homo sapiens NOGOR; NGR       | 0.03065227 | 0.0294926  | 1.23818409 |
| C18orf8     | NM_013326.2 | C18ORF8     | 18 | Homo sapiens HsT2591; MIC     | 2.2201E-06 | 1.2106E-05 | 1.23807901 |
| C14orf2     | NM_004894.1 | C14ORF2     | 14 | Homo sapiens PLPM; MP68       | 2.893E-05  | 8.765E-05  | 1.23803291 |
| IMPAD1      | NM_017813.2 | IMPAD1      | 8  | Homo sapiens IMPA3; FLJ20     | 0.00322818 | 0.00435286 | 1.23796125 |
| FGFR3       | NM_000142.2 | FGFR3       | 4  | Homo sapiens HSFGR3EX; J      | 2.6865E-05 | 8.2736E-05 | 1.23778844 |
| IFI27L1     | NM_145249.2 | IFI27L1     | 14 | Homo sapiens interferon, alp  | 9.8314E-05 | 0.00023659 | 1.23749739 |
| FLOT1       | NM_005803.2 | FLOT1       | 6  | Homo sapiens flotillin 1 (FLO | 5.5781E-05 | 0.00014912 | 1.23744902 |
| KIAA1826    | NM_032424.1 | KIAA1826    | 11 | Homo sapiens KIAA1826 (KI     | 0.00074523 | 0.00125406 | 1.23735675 |
| LCMT1       | NM_00103239 | LCMT1       | 16 | Homo sapiens LCMT; PPMT1;     | 6.801E-06  | 2.8267E-05 | 1.23735207 |
| NARS2       | NM_024678.3 | NARS2       | 11 | Homo sapiens SLM5; FLJ234     | 0.01946741 | 0.02013522 | 1.23723882 |
| ZNHIT1      | NM_006349.2 | ZNHIT1      | 7  | Homo sapiens ZNFN4A1; CG      | 1.4873E-06 | 9.0061E-06 | 1.23711269 |
| MARS2       | NM_138395.2 | MARS2       | 2  | Homo sapiens mtMetRS; Met     | 0.03957814 | 0.03652662 | 1.23694328 |
| SNAPC4      | NM_003086.1 | SNAPC4      | 9  | Homo sapiens SNAP190; FLJ     | 7.8688E-06 | 3.1526E-05 | 1.23693094 |
| SLC12A2     | NM_001046.2 | SLC12A2     | 5  | Homo sapiens NKCC1; BSC2      | 0.00184556 | 0.00270378 | 1.23542886 |
| LOC648638   | XM_937706.1 | LOC648638   |    | PREDICTED: Homo sapiens s     | 5.7476E-06 | 2.4757E-05 | 1.23506088 |
| IL17RD      | NM_017563.1 | IL17RD      | 3  | Homo sapiens DKFZp434N19      | 0.00049572 | 0.0008942  | 1.23491786 |
| LLPH        | NM_032338.3 | LLPH        | 12 | Homo sapiens LLP homolog,     | 4.3185E-06 | 2.009E-05  | 1.2348355  |
| FBXO2       | NM_183412.2 | FBXO2       | 1  | Homo sapiens Fbs1; FBG1; F    | 0.00026759 | 0.00053397 | 1.23452989 |
| CORO1B      | NM_020441.2 | CORO1B      | 11 | Homo sapiens CORONIN-2; I     | 0.00134499 | 0.0020689  | 1.2343356  |
| PLRG1       | NM_002669.2 | PLRG1       | 4  | Homo sapiens MGC110980; I     | 1.6523E-06 | 9.7889E-06 | 1.23416817 |
| DPM1        | NM_003859.1 | DPM1        | 20 | Homo sapiens MPDS; CDGIE      | 4.4818E-07 | 3.7884E-06 | 1.23404426 |
| OCRL        | NM_001587.3 | OCRL        |    | Homo sapiens NPHL2; OCRL1     | 0.00014588 | 0.00032438 | 1.23381964 |
| METTL11A    | NM_014064.2 | METTL11A    | 9  | Homo sapiens AD-003           | 0.00198381 | 0.00287512 | 1.233632   |
| TMEM106A    | NM_145041.1 | TMEM106A    | 17 | Homo sapiens MGC20235         | 0.00333201 | 0.00447635 | 1.23359219 |
| ENO2        | NM_001975.2 | ENO2        | 12 | Homo sapiens NSE              | 4.0895E-06 | 1.9322E-05 | 1.23333813 |
| TMEM60      | NM_032936.2 | TMEM60      | 7  | Homo sapiens MGC74482; C      | 9.3487E-06 | 3.596E-05  | 1.23330847 |
| FAM175A     | NM_139076.2 | FAM175A     | 4  | Homo sapiens ABRA1; FLJ13     | 0.0006835  | 0.00116515 | 1.23305713 |

## 5.0 ACL-Indepen Upreg

|              |             |              |    |                         |                  |            |            |            |
|--------------|-------------|--------------|----|-------------------------|------------------|------------|------------|------------|
| HDAC3        | NM_003883.2 | HDAC3        | 5  | Homo sapiens            | RPD3; HD3; R     | 2.7399E-06 | 1.42E-05   | 1.23287437 |
| BLVRA        | NM_000712.3 | BLVRA        | 7  | Homo sapiens            | BVRA; BLVR       | 6.8656E-06 | 2.8428E-05 | 1.2328022  |
| RP11-529I10. | NM_015448.1 | RP11-529I10. | 10 | Homo sapiens            | DKFZP566F08      | 0.00012796 | 0.00029222 | 1.23260654 |
| TMED7        | NM_181836.3 | TMED7        | 5  | Homo sapiens            | FLJ90481; CG     | 0.00017983 | 0.00038446 | 1.23231955 |
| REEP6        | NM_138393.1 | REEP6        | 19 | Homo sapiens            | FLJ25383; DP     | 9.8114E-05 | 0.00023624 | 1.23122681 |
| KATNA1       | NM_007044.2 | KATNA1       | 6  | Homo sapiens            | katanin p60 (A   | 0.00123327 | 0.00192334 | 1.23113925 |
| LOC728014    | XM_946270.1 | LOC728014    | 12 | PREDICTED: Homo sapiens | s                | 0.00013301 | 0.00030102 | 1.23090688 |
| DCTN5        | NM_032486.2 | DCTN5        | 16 | Homo sapiens            | MGC3248; p2!     | 0.000311   | 0.00060558 | 1.23088276 |
| ACTR10       | NM_018477.1 | ACTR10       | 14 | Homo sapiens            | HARP11; ACTF     | 3.6811E-05 | 0.00010684 | 1.23049126 |
| SCYL2        | NM_017988.4 | SCYL2        | 12 | Homo sapiens            | KIAA1360; CV     | 0.00045222 | 0.00082559 | 1.23042944 |
| GRIPAP1      | NM_020137.3 | GRIPAP1      | X  | Homo sapiens            | DKFZp434P06      | 0.01550564 | 0.01659103 | 1.22942413 |
| MCL1         | NM_021960.3 | MCL1         | 1  | Homo sapiens            | MCL1L; MGC1      | 0.00030603 | 0.00059802 | 1.22931569 |
| CDK6         | NM_001259.5 | CDK6         | 7  | Homo sapiens            | PLSTIRE; MGC     | 0.00010249 | 0.00024462 | 1.22929968 |
| ROBO3        | NM_022370.2 | ROBO3        | 11 | Homo sapiens            | HGPS; HGPPS      | 0.00172918 | 0.00256021 | 1.22896025 |
| C22orf28     | NM_014306.2 | C22ORF28     | 22 | Homo sapiens            | HSPC117; RP1     | 4.7171E-05 | 0.00013027 | 1.2287417  |
| MKRN2        | NM_014160.3 | MKRN2        | 3  | Homo sapiens            | DKFZP070; MKN    | 0.00011608 | 0.0002698  | 1.22852123 |
| TMCO1        | NM_019026.2 | TMCO1        | 1  | Homo sapiens            | HP10122; TMC     | 2.919E-07  | 2.83E-06   | 1.22818797 |
| LOC647037    | XM_930029.1 | LOC647037    | 15 | PREDICTED: Homo sapiens | s                | 0.00012462 | 0.00028579 | 1.2280497  |
| BSCL2        | NM_032667.4 | BSCL2        | 11 | Homo sapiens            | SPG17; MGC4      | 1.2362E-05 | 4.5063E-05 | 1.22775904 |
| TM2D1        | NM_032027.2 | TM2D1        | 1  | Homo sapiens            | BBP              | 7.9986E-05 | 0.00019971 | 1.2277387  |
| WDR54        | NM_032118.2 | WDR54        | 2  | Homo sapiens            | FLJ12953         | 8.7131E-06 | 3.4068E-05 | 1.22767433 |
| RNF182       | NM_152737.2 | RNF182       | 6  | Homo sapiens            | FLJ40772; MG     | 0.04632754 | 0.04165159 | 1.22750098 |
| RAP2A        | NM_021033.4 | RAP2A        | 13 | Homo sapiens            | RAP2; K-REV;     | 7.3957E-05 | 0.00018716 | 1.22683204 |
| ZNF526       | NM_133444.1 | ZNF526       | 19 | Homo sapiens            | KIAA1951; MC     | 0.00258051 | 0.00358932 | 1.22592089 |
| FUCA1        | NM_000147.2 | FUCA1        | 1  | Homo sapiens            | fucosidase, al   | 3.6124E-05 | 0.00010537 | 1.22554337 |
| LMF2         | NM_033200.1 | LMF2         | 22 | Homo sapiens            | TMEM153; TM      | 0.00317793 | 0.00429633 | 1.22527862 |
| ASNSD1       | NM_019048.1 | ASNSD1       | 2  | Homo sapiens            | NBLA00058; N     | 1.6268E-06 | 9.6702E-06 | 1.22515978 |
| PNPLA6       | NM_006702.2 | PNPLA6       | 19 | Homo sapiens            | sws; NTE         | 2.0578E-05 | 6.7471E-05 | 1.22496985 |
| PGS1         | NM_024419.3 | PGS1         | 17 | Homo sapiens            | DKFZP762M1E      | 3.965E-05  | 0.00011295 | 1.22492223 |
| LOC728006    | NM_145039.2 | LOC728006    | 16 | PREDICTED: Homo sapiens | h                | 0.04840835 | 0.04319924 | 1.22482641 |
| GGH          | NM_003878.1 | GGH          | 8  | Homo sapiens            | GH               | 9.4029E-06 | 3.6137E-05 | 1.22471453 |
| MFAP1        | NM_005926.2 | MFAP1        | 15 | Homo sapiens            | microfibrillar-a | 0.00031517 | 0.00061207 | 1.22451937 |
| MMD          | NM_012329.2 | MMD          | 17 | Homo sapiens            | PAQR11; MMA      | 5.6726E-06 | 2.4542E-05 | 1.22419106 |
| LOC389765    | XM_00172064 | LOC389765    |    | PREDICTED: Homo sapiens | s                | 0.00235935 | 0.00333455 | 1.22402328 |
| H1F0         | NM_005318.2 | H1F0         | 22 | Homo sapiens            | H1FV; MGC52      | 2.4912E-07 | 2.5124E-06 | 1.22365185 |
| SNHG9        | NR_003142.2 | SNHG9        | 16 | Homo sapiens            | DKFZp686N06      | 4.0185E-07 | 3.4944E-06 | 1.22354374 |
| BRD7         | NM_013263.2 | BRD7         | 16 | Homo sapiens            | CELTIX1; NAG     | 4.0665E-05 | 0.00011539 | 1.22349878 |
| C20orf4      | NM_015511.2 | C20ORF4      | 20 | Homo sapiens            | ba234k24.2; t    | 0.00040738 | 0.00076001 | 1.22322792 |
| ALDOC        | NM_005165.2 | ALDOC        | 17 | Homo sapiens            | ALDC             | 4.2564E-06 | 1.9875E-05 | 1.22315624 |
| GALNT11      | NM_022087.1 | GALNT11      | 7  | Homo sapiens            | FLJ21634; MG     | 0.00019406 | 0.00041049 | 1.22299718 |
| PDCD4        | NM_145341.2 | PDCD4        | 10 | Homo sapiens            | MGC33046; M      | 0.00258922 | 0.00359972 | 1.22290936 |
| LOC10012921  | XM_00171898 | LOC10012921  | 9  | PREDICTED: Homo sapiens | h                | 0.00075596 | 0.00127065 | 1.2227646  |
| FLJ36131     | XM_00172236 | FLJ36131     |    | PREDICTED: Homo sapiens | h                | 0.00010954 | 0.00025766 | 1.22247086 |
| LYPLAL1      | NM_138794.1 | LYPLAL1      | 1  | Homo sapiens            | KIAA1238         | 5.6817E-06 | 2.4569E-05 | 1.22241935 |
| SDCBP        | NM_00100706 | SDCBP        | 8  | Homo sapiens            | MDA-9; SYCL;     | 0.00030943 | 0.00060304 | 1.22232637 |
| ALDH2        | NM_000690.2 | ALDH2        | 12 | Homo sapiens            | ALDM; ALDH-f     | 0.0037594  | 0.00496762 | 1.22218073 |
| MEF2D        | NM_005920.2 | MEF2D        | 1  | Homo sapiens            | DKFZp686I15      | 0.00042582 | 0.00078789 | 1.22206781 |
| RECQL        | NM_032941.1 | RECQL        | 12 | Homo sapiens            | RecQ1; RECQL     | 0.025632   | 0.02547521 | 1.2219121  |
| LOC401098    | XR_017816.1 | LOC401098    |    | PREDICTED: Homo sapiens | n                | 0.00050548 | 0.00090752 | 1.22177279 |
| TUSC4        | NM_006545.4 | TUSC4        | 3  | Homo sapiens            | NPR2L; NPRL2     | 5.0972E-06 | 2.2656E-05 | 1.22169406 |
| RAB21        | NM_014999.1 | RAB21        | 12 | Homo sapiens            | KIAA0118         | 0.00173661 | 0.00256861 | 1.22165247 |
| IP6K1        | NM_153273.3 | IP6K1        | 3  | Homo sapiens            | PIUS; IP6K1; I   | 0.00247369 | 0.00346602 | 1.22152827 |
| RIMS3        | NM_014747.2 | RIMS3        | 1  | Homo sapiens            | RIM3; NIM3; I    | 0.00736521 | 0.00884148 | 1.22152157 |
| STX6         | NM_005819.4 | STX6         | 1  | Homo sapiens            | syntaxin 6 (ST   | 0.00030894 | 0.00060237 | 1.22144186 |
| LOC648740    | NR_024438.2 | LOC648740    | 1  | Homo sapiens            | ACTB pseudog     | 0.01705436 | 0.01801745 | 1.22133255 |
| USP42        | NM_032172.1 | USP42        | 7  | Homo sapiens            | FLJ12697         | 0.00055013 | 0.00097669 | 1.22128862 |
| COL6A1       | NM_001848.1 | COL6A1       | 21 | Homo sapiens            | OPLL             | 0.00059874 | 0.00104523 | 1.22111103 |
| DDX52        | NM_007010.2 | DDX52        | 17 | Homo sapiens            | ROK1             | 0.00086463 | 0.00142012 | 1.22103069 |
| ACBD3        | NM_022735.3 | ACBD3        | 1  | Homo sapiens            | GOLPH1; PAP7     | 6.9513E-06 | 2.8661E-05 | 1.2210236  |
| ESPN         | NM_031475.1 | ESPN         | 1  | Homo sapiens            | DKFZP434A19      | 0.00421926 | 0.00548766 | 1.22097244 |
| UBR4         | NM_020765.1 | UBR4         | 1  | Homo sapiens            | KIAA1307; FL     | 6.1057E-06 | 2.5942E-05 | 1.22035786 |
| LOC10013360  | XM_00171372 | LOC100133607 |    | PREDICTED: Homo sapiens | h                | 0.00034974 | 0.00066795 | 1.22002328 |
| UNC45A       | NM_017979.1 | UNC45A       | 15 | Homo sapiens            | FLJ10043; SM     | 0.0022526  | 0.00320901 | 1.21984855 |
| NKD2         | NM_033120.2 | NKD2         | 5  | Homo sapiens            | Naked2           | 3.1354E-05 | 9.3445E-05 | 1.21977647 |
| NECAP1       | NM_015509.2 | NECAP1       | 12 | Homo sapiens            | DKFZP566B18      | 6.909E-06  | 2.8527E-05 | 1.21955864 |
| PEPD         | NM_000285.1 | PEPD         | 19 | Homo sapiens            | PROLIDASE; N     | 5.5457E-06 | 2.4076E-05 | 1.21950049 |
| DMAP1        | NM_019100.3 | DMAP1        | 1  | Homo sapiens            | FLJ11543; KIA    | 9.5156E-05 | 0.00023057 | 1.21946051 |
| HLA-F        | NM_018950.1 | HLA-F        | 6  | Homo sapiens            | HLA-F.4; HLAf    | 0.00056898 | 0.00100509 | 1.21941618 |
| UBE1         | NM_153280.1 | UBE1         | X  | Homo sapiens            | UBA1A; A1S9;     | 1.1113E-05 | 4.1332E-05 | 1.21935524 |
| MSX1         | NM_002448.1 | MSX1         | 4  | Homo sapiens            | HOX7; HYD1       | 1.5848E-06 | 9.4659E-06 | 1.21903319 |

## 5.0 ACL-Indepen Upreg

|             |             |              |    |                         |                |            |            |            |
|-------------|-------------|--------------|----|-------------------------|----------------|------------|------------|------------|
| PTGR1       | NM_012212.2 | PTGR1        | 9  | Homo sapiens            | MGC34943       | 4.7097E-05 | 0.00013015 | 1.21883977 |
| TERF2IP     | NM_018975.2 | TERF2IP      | 16 | Homo sapiens            | RAP1; DRIP5    | 3.6293E-05 | 0.00010569 | 1.21817461 |
| UTP6        | NM_018428.2 | UTP6         | 17 | Homo sapiens            | HCA66; C17orf  | 2.5223E-06 | 1.3356E-05 | 1.21795576 |
| ARHGEF18    | NM_015318.2 | ARHGEF18     | 19 | Homo sapiens            | KIAA0521; MGC  | 1.7024E-05 | 5.8119E-05 | 1.21785116 |
| PPIB        | NM_000942.4 | PPIB         | 15 | Homo sapiens            | MGC14109; M    | 0.00672672 | 0.00818475 | 1.21774778 |
| SELS        | NM_203472.1 | SELS         | 15 | Homo sapiens            | SEPS1; ADO1    | 5.2425E-05 | 0.00014192 | 1.21764756 |
| C14orf85    | NR_002808.1 | C14ORF85     | 14 | Homo sapiens            | chromosome 1   | 0.00665684 | 0.0081121  | 1.21759404 |
| MRPL14      | NM_032111.2 | MRPL14       | 6  | Homo sapiens            | MGC70566; R    | 5.4779E-07 | 4.3654E-06 | 1.21758825 |
| RFC1        | NM_002913.3 | RFC1         | 4  | Homo sapiens            | RECC1; RFC1    | 0.00277857 | 0.00382119 | 1.21726012 |
| LOC10000858 | NR_003286.1 | LOC100008588 |    | Homo sapiens            | 18S ribosomal  | 1.2426E-07 | 1.5893E-06 | 1.21725395 |
| AXIN2       | NM_004655.2 | AXIN2        | 17 | Homo sapiens            | MGC126582; I   | 0.00042518 | 0.00078737 | 1.21671747 |
| RARS        | NM_002887.3 | RARS         | 5  | Homo sapiens            | ArgRS; DALRC   | 4.1264E-07 | 3.5635E-06 | 1.21623369 |
| KLHL8       | NM_020803.3 | KLHL8        | 4  | Homo sapiens            | FLJ46304; KIA  | 8.1399E-05 | 0.00020272 | 1.21594683 |
| MAN2B2      | NM_015274.1 | MAN2B2       | 4  | Homo sapiens            | KIAA0935       | 4.4856E-05 | 0.00012498 | 1.21578867 |
| FLYWCH2     | NM_138439.1 | FLYWCH2      | 16 | Homo sapiens            | FLYWCH family  | 0.02362619 | 0.02380525 | 1.2157238  |
| LOC645895   | XM_928866.1 | LOC645895    | 8  | PREDICTED: Homo sapiens | h              | 0.00033964 | 0.00065236 | 1.21534467 |
| ANKRD57     | NM_023016.2 | ANKRD57      | 2  | Homo sapiens            | C2orf26        | 0.00027    | 0.00053743 | 1.21531356 |
| PRUNE       | NM_021222.1 | PRUNE        | 1  | Homo sapiens            | DRES-17; HTC   | 0.02528338 | 0.02520581 | 1.21511678 |
| RNF126      | NM_194460.1 | RNF126       | 19 | Homo sapiens            | MGC14317; M    | 0.00108084 | 0.00171923 | 1.21511353 |
| PLEKHA1     | NM_021622.3 | PLEKHA1      | 10 | Homo sapiens            | TAPP1          | 2.904E-05  | 8.789E-05  | 1.21508432 |
| LOC730432   | XM_936257.1 | LOC730432    |    | PREDICTED: Homo sapiens | s              | 2.2988E-05 | 7.3478E-05 | 1.21489094 |
| EIF2B2      | NM_014239.2 | EIF2B2       | 14 | Homo sapiens            | EIF-2Bbeta; E  | 8.979E-06  | 3.4875E-05 | 1.21439799 |
| LOC10013253 | XR_038464.1 | LOC100132535 |    | PREDICTED: Homo sapiens | n              | 0.01189015 | 0.01326605 | 1.21430931 |
| TNFRSF10B   | NM_003842.3 | TNFRSF10B    | 8  | Homo sapiens            | KILLER/DR5; T  | 0.0054186  | 0.00680641 | 1.21398831 |
| MRFAP1L1    | NM_203462.1 | MRFAP1L1     | 4  | Homo sapiens            | PP784; MGC9    | 0.00028447 | 0.00056189 | 1.21394698 |
| HSDL2       | NM_032303.2 | HSDL2        | 9  | Homo sapiens            | MGC10940; C    | 0.00243912 | 0.00342852 | 1.21389264 |
| PEX11B      | NM_003846.1 | PEX11B       | 1  | Homo sapiens            | PEX11-BETA     | 1.9808E-05 | 6.5411E-05 | 1.21363097 |
| ATP1B1      | NM_00100178 | ATP1B1       | 1  | Homo sapiens            | MGC1798; AT    | 5.1083E-06 | 2.2671E-05 | 1.21315494 |
| EIF1B       | NM_005875.2 | EIF1B        | 3  | Homo sapiens            | GC20           | 4.7397E-06 | 2.1525E-05 | 1.21313735 |
| LMAN2L      | NM_030805.1 | LMAN2L       | 2  | Homo sapiens            | MGC11139; V    | 5.5165E-05 | 0.00014784 | 1.21298237 |
| TANC2       | NM_025185.3 | TANC2        | 17 | Homo sapiens            | FLJ11824; KIA  | 0.02326352 | 0.02350192 | 1.21249322 |
| ENC1        | NM_003633.1 | ENC1         | 5  | Homo sapiens            | PIG10; NRPB;   | 0.00636874 | 0.00781419 | 1.21211727 |
| CLSTN1      | NM_00100956 | CLSTN1       | 1  | Homo sapiens            | CSSTN1; PIK3C  | 4.9858E-05 | 0.00013632 | 1.21090431 |
| UBLCP1      | NM_145049.1 | UBLCP1       | 5  | Homo sapiens            | MGC10067; FI   | 0.00019626 | 0.00041365 | 1.21082093 |
| TUBB4Q      | NM_020040.3 | TUBB4Q       | 4  | Homo sapiens            | tubulin, beta  | 7.8863E-05 | 0.00019719 | 1.21080537 |
| C7orf23     | NM_024315.2 | C7ORF23      | 7  | Homo sapiens            | MM-TRAG; MG    | 0.00656398 | 0.00802123 | 1.21069121 |
| TRAPPC4     | NM_016146.1 | TRAPPC4      | 11 | Homo sapiens            | SDN; CGI-10    | 6.0971E-05 | 0.00015974 | 1.21061209 |
| MAPRE2      | NM_014268.1 | MAPRE2       | 18 | Homo sapiens            | RP1; EB1; EB2  | 0.00034136 | 0.00065509 | 1.21055754 |
| LOC10012828 | NR_024447.1 | LOC10012828  |    | Homo sapiens            | hypothetical p | 0.00112566 | 0.00177924 | 1.21010494 |
| FRG1        | NM_004477.2 | FRG1         | 4  | Homo sapiens            | FSG1; FRG1a    | 3.9629E-05 | 0.00011293 | 1.21010396 |
| MAP3K7      | NM_145333.1 | MAP3K7       | 6  | Homo sapiens            | TAK1; TGF1a    | 0.00066554 | 0.00113897 | 1.21007488 |
| COPE        | NM_199444.1 | COPE         | 19 | Homo sapiens            | FLJ13241; eps  | 4.5173E-06 | 2.0773E-05 | 1.20986361 |
| C14orf153   | NM_032374.2 | C14ORF153    | 14 | Homo sapiens            | Apop-1; MGC2   | 0.00194482 | 0.00282842 | 1.20969921 |
| PSMD13      | NM_002817.2 | PSMD13       | 11 | Homo sapiens            | HSPC027; p4    | 0.00499934 | 0.00634977 | 1.20888524 |
| LSR         | NM_205834.2 | LSR          | 19 | Homo sapiens            | MGC48312; LI   | 0.00658962 | 0.00804472 | 1.20877869 |
| EBAG9       | NM_198120.1 | EBAG9        | 8  | Homo sapiens            | RCAS1; EB9; I  | 0.0029347  | 0.00400576 | 1.20871873 |
| TMC6        | NM_007267.5 | TMC6         | 17 | Homo sapiens            | LAK-4P; EVIN   | 0.00368283 | 0.00487673 | 1.20869467 |
| CDR2L       | NM_014603.1 | CDR2L        | 17 | Homo sapiens            | HUMPPA         | 6.0725E-06 | 2.5852E-05 | 1.20828837 |
| YTHDF1      | NM_017798.2 | YTHDF1       | 20 | Homo sapiens            | C20orf21; FLJ  | 4.1707E-05 | 0.00011782 | 1.20785244 |
| ZDHHC7      | NM_017740.1 | ZDHHC7       | 16 | Homo sapiens            | ZNF370; FLJ1   | 4.16E-06   | 1.955E-05  | 1.20779052 |
| MIPEP       | NM_005932.1 | MIPEP        | 13 | Homo sapiens            | HMIP; MIP      | 0.01116805 | 0.0125933  | 1.20756341 |
| ALKBH3      | NM_139178.1 | ALKBH3       | 11 | Homo sapiens            | MGC118790; I   | 0.00247193 | 0.00346466 | 1.20748881 |
| MAGEB6B     | XM_373340.1 | MAGEB6B      |    | PREDICTED: Homo sapiens | n              | 0.00021178 | 0.0004399  | 1.20735672 |
| TNFRSF12A   | NM_016639.1 | TNFRSF12A    | 16 | Homo sapiens            | CD266; TWEA    | 1.4382E-05 | 5.084E-05  | 1.20723253 |
| FAM119A     | NM_00112739 | FAM119A      | 2  | Homo sapiens            | family with se | 0.00086628 | 0.0014223  | 1.20707366 |
| CHD8        | NM_020920.1 | CHD8         | 14 | Homo sapiens            | KIAA1564; DK   | 0.00032117 | 0.00062152 | 1.20703477 |
| KLC1        | NM_005552.3 | KLC1         | 14 | Homo sapiens            | KLC1; KLC; K   | 0.00385084 | 0.00507774 | 1.20656613 |
| PHRF1       | NM_020901.1 | PHRF1        | 11 | Homo sapiens            | PHD and ring   | 3.0226E-05 | 9.0638E-05 | 1.20606961 |
| LOC374395   | NM_199337.1 | LOC374395    |    | Homo sapiens            | similar to RIK | 4.3366E-07 | 3.7121E-06 | 1.20563021 |
| GLRX        | NM_002064.1 | GLRX         | 5  | Homo sapiens            | GRX; GRX1; M   | 6.3253E-06 | 2.6643E-05 | 1.20540264 |
| VAMP7       | NM_005638.3 | VAMP7        |    | Homo sapiens            | TI-VAMP; VAM   | 0.00028774 | 0.00056746 | 1.20533723 |
| CHTF18      | NM_022092.1 | CHTF18       | 16 | Homo sapiens            | Ctf18; C321D   | 0.00560063 | 0.00700598 | 1.20525921 |
| ZMIZ1       | NM_020338.2 | ZMIZ1        | 10 | Homo sapiens            | MIZ; Zimp10;   | 4.5665E-05 | 0.00012691 | 1.20403506 |
| CYFIP2      | NM_00103733 | CYFIP2       | 5  | Homo sapiens            | PIR121         | 0.00179085 | 0.00263905 | 1.20399889 |
| BLMH        | NM_000386.2 | BLMH         | 17 | Homo sapiens            | BMH; BH        | 0.01280163 | 0.01411606 | 1.20376234 |
| MRPL40      | NM_003776.2 | MRPL40       | 22 | Homo sapiens            | NLVCF; URIM;   | 0.00021358 | 0.0004428  | 1.20370357 |
| CCDC45      | NM_138363.1 | CCDC45       | 17 | Homo sapiens            | DKFZp667E18    | 0.00068398 | 0.00116529 | 1.20365803 |
| HSPC268     | NM_197964.1 | HSPC268      | 7  | Homo sapiens            | hypothetical p | 0.00166308 | 0.00247404 | 1.20350034 |
| LOC641992   | XM_935770.1 | LOC641992    |    | PREDICTED: Homo sapiens | s              | 0.04473689 | 0.04048282 | 1.20347012 |
| GAPVD1      | NM_015635.2 | GAPVD1       | 9  | Homo sapiens            | MGC138848; I   | 0.00012677 | 0.00028987 | 1.20341782 |

## 5.0 ACL-Indepen Upreg

|             |             |             |    |                              |            |            |            |
|-------------|-------------|-------------|----|------------------------------|------------|------------|------------|
| WDR45L      | NM_019613.2 | WDR45L      | 17 | Homo sapiens WIPI-3; WIPI3   | 0.00219173 | 0.00313298 | 1.20331744 |
| LOC729843   | NM_012477.2 | LOC729843   | 2  | PREDICTED: Homo sapiens s    | 3.2196E-05 | 9.5404E-05 | 1.20231107 |
| SRP54       | NM_003136.2 | SRP54       | 14 | Homo sapiens signal recognit | 4.0957E-06 | 1.9331E-05 | 1.20195407 |
| BMS1P5      | NR_003611.2 | BMS1P5      | 10 | Homo sapiens BMS1 pseudoc    | 0.00175581 | 0.00259308 | 1.20193561 |
| CTNBNB1     | NM_030877.3 | CTNBNB1     | 20 | Homo sapiens C20orf33; NAF   | 6.4767E-05 | 0.00016763 | 1.20109874 |
| ANKRD13A    | NM_033121.1 | ANKRD13A    | 12 | Homo sapiens ANKRD13; NY-    | 0.02821437 | 0.02757635 | 1.20086106 |
| LGALS1      | NM_002305.2 | LGALS1      | 22 | Homo sapiens DKFZp686E23     | 2.0715E-07 | 2.2085E-06 | 1.20065052 |
| EHD1        | NM_006172.2 | EHD1        | 11 | Homo sapiens PAST1; PAST;    | 0.00035489 | 0.00067632 | 1.20046614 |
| PIAS1       | NM_016166.1 | PIAS1       | 15 | Homo sapiens MGC141879; I    | 0.00250965 | 0.00350688 | 1.20000229 |
| LOC10013239 | XM_00171645 | LOC10013239 | 17 | PREDICTED: Homo sapiens h    | 0.00054812 | 0.00097412 | 1.19937827 |
| APPL2       | NM_018171.2 | APPL2       | 12 | Homo sapiens DIP13B; FLJ10   | 0.01550738 | 0.01659088 | 1.19923601 |
| PCMT1       | NM_005389.1 | PCMT1       | 6  | Homo sapiens protein-L-isoa  | 1.1231E-07 | 1.5045E-06 | 1.19915066 |
| C12orf47    | NM_016534.2 | C12ORF47    |    | PREDICTED: Homo sapiens c    | 7.3729E-05 | 0.00018675 | 1.19910575 |
| LOC124512   | XM_940962.1 | LOC124512   |    | PREDICTED: Homo sapiens h    | 2.6815E-06 | 1.4005E-05 | 1.19905195 |
| EFR3A       | NM_015137.1 | EFR3A       | 8  | Homo sapiens KIAA0143; DK    | 1.5085E-05 | 5.2733E-05 | 1.19894946 |
| LOC10013258 | XM_00172211 | LOC10013258 | 7  | PREDICTED: Homo sapiens h    | 0.00028499 | 0.00056266 | 1.19870553 |
| KATNB1      | NM_005886.1 | KATNB1      | 16 | Homo sapiens KAT             | 0.00027623 | 0.00054723 | 1.19853114 |
| CAND1       | NM_018448.2 | CAND1       | 12 | Homo sapiens FLJ90441; FLJ   | 0.01230141 | 0.01365026 | 1.19852618 |
| UBE2L3      | NM_003347.2 | UBE2L3      | 22 | Homo sapiens L-UBC; UBCH7    | 0.05646505 | 0.04912    | 1.19851399 |
|             | Hs.250648   | HS.250648   | 3  | full-length cDNA clone CS0D  | 0.01805577 | 0.01887767 | 1.19843556 |
| NDUFA11     | NM_175614.2 | NDUFA11     | 19 | Homo sapiens B14.7           | 1.3654E-05 | 4.8579E-05 | 1.1983946  |
| SPG7        | NM_199367.1 | SPG7        | 16 | Homo sapiens CAR; FLJ3730;   | 0.0023509  | 0.00332583 | 1.19834411 |
| RNF4        | NM_002938.2 | RNF4        | 4  | Homo sapiens RES4-26; SNU    | 0.00083564 | 0.00138104 | 1.19815662 |
| LOC10012797 | XR_038064.1 | LOC10012797 |    | PREDICTED: Homo sapiens n    | 0.00236541 | 0.00334204 | 1.19812165 |
| ADIPOR2     | NM_024551.2 | ADIPOR2     | 12 | Homo sapiens MGC4640; ACI    | 2.4405E-06 | 1.3025E-05 | 1.19791709 |
| HSF2        | NM_004506.2 | HSF2        | 6  | Homo sapiens MGC117376; I    | 0.00993604 | 0.01140785 | 1.1972515  |
| TBC1D2B     | NM_015079.2 | TBC1D2B     | 15 | Homo sapiens KIAA1055; FL-   | 0.04949188 | 0.04396049 | 1.19679822 |
| LRFN3       | NM_024509.1 | LRFN3       | 19 | Homo sapiens FIGLER1; MGC    | 0.00049782 | 0.00089652 | 1.19659282 |
| PTPN1       | NM_002827.2 | PTPN1       | 20 | Homo sapiens PTP1B           | 6.0659E-06 | 2.5836E-05 | 1.19646833 |
| CATSPER2    | NM_172097.1 | CATSPER2    | 15 | Homo sapiens MGC33346        | 0.00111198 | 0.00176078 | 1.19610589 |
| CCDC130     | NM_030818.2 | CCDC130     | 19 | Homo sapiens MGC10471        | 1.2443E-05 | 4.528E-05  | 1.195996   |
| LEPROTL1    | NM_015344.1 | LEPROTL1    | 8  | Homo sapiens HSPC112; Vps    | 0.0002473  | 0.00050088 | 1.19589432 |
| GSK3B       | NM_001093.2 | GSK3B       | 3  | Homo sapiens glycoen syntl   | 0.00126119 | 0.00195922 | 1.19574899 |
| EIF4E2      | NM_004846.2 | EIF4E2      | 2  | Homo sapiens EIF4EL3; 4E-L   | 0.00052987 | 0.00094494 | 1.19566397 |
| TFB1M       | NM_016020.1 | TFB1M       | 6  | Homo sapiens CG175; mtTFB    | 0.00022445 | 0.00046142 | 1.19558114 |
| LOC10013464 | XM_00172468 | LOC10013464 | 7  | PREDICTED: Homo sapiens s    | 0.00170777 | 0.00253279 | 1.19552062 |
| ABR         | NM_001092.3 | ABR         | 17 | Homo sapiens MDB; FLJ4595    | 0.00424295 | 0.00551276 | 1.19546553 |
| PPM1H       | XM_939302.1 | PPM1H       | 12 | Homo sapiens KIAA1157; FL-   | 0.01836396 | 0.01914058 | 1.19544193 |
| GABARAPL2   | NM_007285.6 | GABARAPL2   | 16 | Homo sapiens GEF2; GATE1E    | 1.922E-05  | 6.4023E-05 | 1.19455921 |
| CXXC1       | NM_014593.2 | CXXC1       | 18 | Homo sapiens SPP1; HsT264    | 1.3494E-05 | 4.8167E-05 | 1.1944774  |
| AP4B1       | NM_006594.1 | AP4B1       | 1  | Homo sapiens BETA-4          | 0.00103304 | 0.00165219 | 1.19440113 |
| GNA11       | NM_002067.1 | GNA11       | 19 | Homo sapiens GNA-11          | 0.00015894 | 0.00034882 | 1.19429568 |
| SPG11       | NM_025137.2 | SPG11       | 15 | Homo sapiens KIAA1840; DK    | 0.00136223 | 0.00209211 | 1.19429246 |
| UBL5        | NM_00104824 | UBL5        | 19 | Homo sapiens HUB1; MGC13     | 3.9951E-06 | 1.8938E-05 | 1.19403547 |
| LOC729120   | XM_00113302 | LOC729120   |    | PREDICTED: Homo sapiens h    | 0.00658752 | 0.00804327 | 1.1939057  |
| C19orf60    | NM_00110041 | C19ORF60    | 19 | Homo sapiens FLJ20850; FLJ   | 5.2716E-05 | 0.00014249 | 1.19375102 |
| LOC10012850 | XM_00172323 | LOC10012850 |    | PREDICTED: Homo sapiens s    | 0.00053113 | 0.0009468  | 1.1937143  |
| NPLOC4      | NM_017921.1 | NPLOC4      | 17 | Homo sapiens FLJ20657; FLJ   | 0.00017581 | 0.00037808 | 1.19357198 |
| PRDX1       | NM_181696.1 | PRDX1       | 1  | Homo sapiens MSP23; PAG; I   | 1.3158E-07 | 1.654E-06  | 1.19354191 |
| FAM98A      | NM_015475.3 | FAM98A      | 2  | Homo sapiens DKFZp686O03     | 2.614E-06  | 1.3734E-05 | 1.19316113 |
| MRPL10      | NM_145255.2 | MRPL10      | 17 | Homo sapiens MGC17973; RI    | 0.00083505 | 0.00138058 | 1.19287762 |
| LOC729559   | XM_941844.1 | LOC729559   | 1  | PREDICTED: Homo sapiens s    | 0.01638484 | 0.01739179 | 1.19266506 |
| VGLL4       | NM_014667.1 | VGLL4       | 3  | Homo sapiens VGL-4; KIAA0    | 0.00354651 | 0.00472617 | 1.192646   |
| UCHL3       | NM_006002.3 | UCHL3       | 13 | Homo sapiens UCH-L3          | 0.00019241 | 0.00040808 | 1.19254685 |
| LOC729086   | XM_00112928 | LOC729086   | 1  | PREDICTED: Homo sapiens s    | 0.0018464  | 0.00270456 | 1.1922396  |
| UBE2N       | NM_003348.3 | UBE2N       | 12 | Homo sapiens MGC8489; MG     | 2.1501E-05 | 6.9689E-05 | 1.19158065 |
| ATG7        | NM_006395.1 | ATG7        | 3  | Homo sapiens APG7L; DKFZp    | 0.00560614 | 0.00701087 | 1.19143959 |
| ZFYVE19     | NM_032850.3 | ZFYVE19     | 15 | Homo sapiens FLJ14840; MP    | 0.01018797 | 0.0116544  | 1.19131287 |
| IK          | NM_006083.2 | IK          | 5  | Homo sapiens RED; MGC597     | 2.7699E-06 | 1.4338E-05 | 1.19107234 |
| IDH2        | NM_002168.2 | IDH2        | 15 | Homo sapiens ICD-M; IDHM;    | 0.00802145 | 0.00950956 | 1.19086825 |
| FAM117B     | NM_173511.2 | FAM117B     | 2  | Homo sapiens FLJ38771; DK    | 0.00187661 | 0.00274285 | 1.19060061 |
| SFRS7       | NM_00103168 | SFRS7       | 2  | Homo sapiens 9G8; HSSG1;     | 0.00031004 | 0.00060397 | 1.19058937 |
| UBE3C       | NM_014671.1 | UBE3C       | 7  | Homo sapiens KIAA10; KIAA    | 2.5097E-05 | 7.8502E-05 | 1.19047833 |
| SLC24A6     | NM_024959.2 | SLC24A6     | 12 | Homo sapiens FLJ22233; NC    | 0.00124329 | 0.00193724 | 1.19010715 |
| FAM104A     | NM_032837.1 | FAM104A     | 17 | Homo sapiens FLJ14775        | 1.0993E-05 | 4.101E-05  | 1.18995939 |
| ZNF143      | NM_003442.3 | ZNF143      | 11 | Homo sapiens pHZ-1; STAF;    | 0.01120978 | 0.01263062 | 1.18950747 |
| NSFL1C      | NM_182483.1 | NSFL1C      | 20 | Homo sapiens UBXD10; p47;    | 0.00361163 | 0.00479474 | 1.18929227 |
| C16orf58    | NM_022744.1 | C16ORF58    | 16 | Homo sapiens FLJ13868        | 3.5441E-05 | 0.00010383 | 1.18913813 |
| INTS1       | NM_00108045 | INTS1       | 7  | Homo sapiens KIAA1440; DK    | 0.00023584 | 0.00048145 | 1.18899876 |
| MYH10       | NM_005964.1 | MYH10       | 17 | Homo sapiens NMMHCB; MGI     | 5.541E-06  | 2.4068E-05 | 1.18863584 |

## 5.0 ACL-Indepen Upreg

|             |             |             |    |                              |            |            |            |
|-------------|-------------|-------------|----|------------------------------|------------|------------|------------|
| NUB1        | NM_016118.3 | NUB1        | 7  | Homo sapiens NUB1L; NYREI    | 0.01293612 | 0.0142411  | 1.18861993 |
| TMEM118     | NM_032814.1 | TMEM118     |    | Homo sapiens FLJ14627        | 0.00012103 | 0.00027886 | 1.18789454 |
| LOC728809   | XM_00171954 | LOC728809   |    | PREDICTED: Homo sapiens h    | 0.00113198 | 0.00178665 | 1.18771856 |
| KTI12       | NM_138417.2 | KTI12       | 1  | Homo sapiens TOT4; SBBI81    | 0.00170648 | 0.0025313  | 1.18754346 |
| PAPD5       | NM_022447.1 | PAPD5       | 16 | Homo sapiens FLJ40270; TRI   | 0.00389425 | 0.00512727 | 1.18742853 |
| IER3IP1     | NM_016097.2 | IER3IP1     | 18 | Homo sapiens PRO2309; HSF    | 0.00211576 | 0.00304323 | 1.18739819 |
| LOC10012950 | XM_00172168 | LOC10012950 |    | PREDICTED: Homo sapiens h    | 0.00838134 | 0.00988279 | 1.18705306 |
| LOC10013486 | NR_004846.2 | LOC10013486 | 20 | Homo sapiens hypothetical L  | 0.00242012 | 0.00340509 | 1.18664611 |
| SNX2        | NM_003100.2 | SNX2        | 5  | Homo sapiens TRG-9; MGC5     | 7.8073E-05 | 0.00019577 | 1.1862215  |
| RABL2B      | NM_007081.2 | RABL2B      | 22 | Homo sapiens RAB, member     | 0.00179911 | 0.00264855 | 1.18620228 |
| CARHSP1     | NM_014316.1 | CARHSP1     | 16 | Homo sapiens CSDC1; MGC1     | 0.00017426 | 0.00037566 | 1.18611443 |
| YIPF3       | NM_015388.2 | YIPF3       | 6  | Homo sapiens FinGER3; dJ3    | 5.34E-05   | 0.00014399 | 1.18576446 |
| LRRC1       | NM_025168.1 | LRRC1       | 6  | Homo sapiens dJ523E19.1; L   | 0.01361756 | 0.0148663  | 1.18554749 |
| DAD1        | NM_001344.1 | DAD1        | 14 | Homo sapiens OST2            | 1.3032E-07 | 1.6476E-06 | 1.18539872 |
| PSAP        | NM_002778.1 | PSAP        | 10 | Homo sapiens GLBA; SAP1; I   | 1.1087E-06 | 7.2328E-06 | 1.18523548 |
| CCND1       | NM_053056.1 | CCND1       | 11 | Homo sapiens PRAD1; D11S     | 4.5533E-07 | 3.8267E-06 | 1.18512658 |
| LOC203547   | NM_00101798 | LOC203547   |    | Homo sapiens MGC131652; I    | 0.00020951 | 0.00043612 | 1.18477892 |
| INTS4       | XM_941208.1 | INTS4       | 11 | Homo sapiens INT4; MST093    | 0.05040738 | 0.04459759 | 1.18459948 |
| RDH14       | NM_020905.1 | RDH14       | 2  | Homo sapiens PAN2            | 0.00030096 | 0.00058995 | 1.184563   |
| GTF2H5      | NM_207118.1 | GTF2H5      | 6  | Homo sapiens C6orf175; TTC   | 1.2345E-06 | 7.8486E-06 | 1.18450671 |
| ATMIN       | NM_015251.2 | ATMIN       | 16 | Homo sapiens FLJ76795; ZN    | 0.00848156 | 0.00997683 | 1.18437107 |
| UBXN1       | NM_015853.3 | UBXN1       | 11 | Homo sapiens 2B28            | 5.179E-06  | 2.2938E-05 | 1.18385205 |
| STX16       | NM_00100143 | STX16       | 20 | Homo sapiens hsyn16; SYN1    | 0.0030459  | 0.00413951 | 1.18362684 |
| LOC730990   | XM_00172206 | LOC730990   |    | PREDICTED: Homo sapiens h    | 0.00925488 | 0.010751   | 1.18361522 |
| DPM3        | NM_153741.1 | DPM3        | 1  | Homo sapiens MGC34275; M     | 0.00091031 | 0.00148293 | 1.18360748 |
| LOC648921   | XM_00172057 | LOC648921   |    | PREDICTED: Homo sapiens s    | 0.00200458 | 0.00289995 | 1.18301626 |
| PIN1        | NM_006221.2 | PIN1        | 19 | Homo sapiens UBL5; DOD       | 2.9878E-06 | 1.5162E-05 | 1.18289221 |
| RAP1BL      | NM_00108970 | RAP1BL      |    | Homo sapiens hCG1757335 (    | 0.02863551 | 0.02789784 | 1.18282846 |
| COPB2       | NM_004766.1 | COPB2       | 3  | Homo sapiens beta'-COP       | 3.2708E-05 | 9.6756E-05 | 1.18233981 |
| GTF3C1      | NM_001520.1 | GTF3C1      | 16 | Homo sapiens TFIIC220; TF    | 0.0010493  | 0.00167544 | 1.18170698 |
| LOC10013198 | XM_00172507 | LOC10013198 |    | 2 PREDICTED: Homo sapiens h  | 0.00024818 | 0.0005022  | 1.18161173 |
| PIP4K2A     | NM_005028.4 | PIP4K2A     | 10 | Homo sapiens PIP5KII-alpha;  | 2.6369E-06 | 1.3788E-05 | 1.1814802  |
| FOS         | NM_005252.2 | FOS         | 14 | Homo sapiens c-fos           | 3.578E-06  | 1.7421E-05 | 1.18119554 |
| SLC35E1     | NM_024881.3 | SLC35E1     | 19 | Homo sapiens MGC44954; FL    | 0.00358354 | 0.00476249 | 1.18117303 |
| SETD3       | NM_199123.1 | SETD3       | 14 | Homo sapiens C14orf154; FL   | 0.00056028 | 0.00099211 | 1.18101956 |
| IRF3        | NM_001571.2 | IRF3        | 19 | Homo sapiens interferon regu | 0.01250758 | 0.01384227 | 1.18095158 |
| ZBTB4       | NM_020899.2 | ZBTB4       | 17 | Homo sapiens KAISO-L1; KI/   | 0.00899783 | 0.01050106 | 1.18052641 |
| ANKMY2      | NM_020319.1 | ANKMY2      | 7  | Homo sapiens DKFZP564O04     | 0.00175357 | 0.0025902  | 1.1801236  |
| APRT        | NM_000485.2 | APRT        | 16 | Homo sapiens MGC125857; /    | 1.4348E-05 | 5.0741E-05 | 1.17972419 |
| FNDC3B      | NM_00113509 | FNDC3B      | 3  | Homo sapiens fibronectin typ | 0.00071635 | 0.00121174 | 1.17961294 |
| C21orf55    | NM_017833.2 | C21orf55    | 21 | Homo sapiens C21orf78        | 3.9232E-05 | 0.0001122  | 1.17954219 |
| UCRC        | NM_00100368 | UCRC        | 22 | Homo sapiens HSPC151; HSF    | 0.00224364 | 0.00319781 | 1.17950119 |
| LRAP        | NM_022350.1 | LRAP        | 5  | Homo sapiens FLJ23633; FLJ   | 0.0023896  | 0.00337188 | 1.17926576 |
| C3orf34     | NM_032898.2 | C3orf34     | 3  | Homo sapiens MGC14126        | 0.00052649 | 0.00094005 | 1.17895082 |
| LOC644033   | XM_927280.1 | LOC644033   |    | 8 PREDICTED: Homo sapiens s  | 0.00148946 | 0.00225514 | 1.17849867 |
| DBNL        | NM_014063.5 | DBNL        | 7  | Homo sapiens SH3P7; HIP-5'   | 4.0225E-05 | 0.00011429 | 1.1782303  |
| C15orf63    | NM_016400.2 | C15orf63    | 15 | Homo sapiens HSPC136         | 0.0001733  | 0.00037415 | 1.17822349 |
| XRCC2       | NM_005431.1 | XRCC2       | 7  | Homo sapiens DKFZp781P09     | 0.02100026 | 0.02149012 | 1.17820979 |
| VARS2       | NM_020442.3 | VARS2       | 6  | Homo sapiens VARS2L; MGC     | 0.02202196 | 0.022405   | 1.17775315 |
| LOC10012808 | XM_00171979 | LOC10012808 |    | PREDICTED: Homo sapiens h    | 3.077E-05  | 9.1985E-05 | 1.1771448  |
| HSD17B7     | NM_016371.2 | HSD17B7     | 1  | Homo sapiens MGC12523; M     | 0.00074715 | 0.00125704 | 1.17713652 |
| PAIP2       | NM_00103311 | PAIP2       | 5  | Homo sapiens PAIP2A; MGC7    | 2.625E-05  | 8.1128E-05 | 1.17688964 |
| SCARB2      | NM_005506.2 | SCARB2      | 4  | Homo sapiens CD36L2; HLGf    | 8.3099E-06 | 3.274E-05  | 1.17688713 |
| SLC2A6      | NM_017585.2 | SLC2A6      | 9  | Homo sapiens GLUT6; HSA0     | 0.01605931 | 0.01708761 | 1.17666926 |
| ISG15       | NM_005101.1 | ISG15       | 1  | Homo sapiens G1P2; UCRP; I   | 1.63E-05   | 5.6261E-05 | 1.17659858 |
| IL18        | NM_001562.2 | IL18        | 11 | Homo sapiens MGC12320; IL    | 4.8082E-06 | 2.1779E-05 | 1.17656874 |
| MYO9B       | NM_004145.2 | MYO9B       | 19 | Homo sapiens MYR5; CELIAC    | 0.00633701 | 0.00778616 | 1.17653785 |
| C4orf27     | NM_017867.1 | C4orf27     | 4  | Homo sapiens FLJ20534        | 0.00287988 | 0.00394074 | 1.17642332 |
| RHOC        | NM_175744.3 | RHOC        | 1  | Homo sapiens H9; ARHC; MC    | 3.8295E-07 | 3.3735E-06 | 1.17630618 |
| SH3GLB2     | NM_020145.2 | SH3GLB2     | 9  | Homo sapiens PP9455; PP65    | 6.8851E-06 | 2.8455E-05 | 1.17616681 |
| SARS        | NM_006513.2 | SARS        | 1  | Homo sapiens SERRS; FLJ36    | 0.00021387 | 0.0004433  | 1.17614321 |
| LOC10013171 | XR_038705.1 | LOC10013171 |    | PREDICTED: Homo sapiens n    | 0.00015066 | 0.0003333  | 1.1759899  |
| ZNF69       | NM_021915.2 | ZNF69       | 19 | Homo sapiens MGC59928; C     | 0.00208419 | 0.00300225 | 1.17594141 |
| RALA        | NM_005402.2 | RALA        | 7  | Homo sapiens MGC48949; R     | 6.9499E-06 | 2.8669E-05 | 1.17560294 |
| GALK1       | NM_000154.1 | GALK1       | 17 | Homo sapiens GALK; GK1       | 8.3175E-06 | 3.2755E-05 | 1.17548623 |
| ATP1B3      | NM_001679.2 | ATP1B3      |    | PREDICTED: Homo sapiens A    | 5.254E-06  | 2.32E-05   | 1.17535825 |
| MBD4        | NM_003925.1 | MBD4        | 3  | Homo sapiens MED1            | 0.00097485 | 0.00157173 | 1.17473492 |
| RNF149      | NM_173647.2 | RNF149      | 2  | Homo sapiens FLJ90504; DN    | 4.7384E-05 | 0.00013066 | 1.1746228  |
| NLGN2       | NM_020795.2 | NLGN2       | 17 | Homo sapiens KIAA1366        | 0.0080657  | 0.00955426 | 1.17422471 |
| SDF2        | NM_006923.2 | SDF2        | 17 | Homo sapiens stromal cell-d  | 5.2925E-05 | 0.00014297 | 1.17381932 |

## 5.0 ACL-Indepen Upreg

|             |                          |                                 |            |            |            |
|-------------|--------------------------|---------------------------------|------------|------------|------------|
| ATP6V0C     | NM_001694.2 ATP6V0C      | PREDICTED: Homo sapiens A       | 1.4968E-05 | 5.2427E-05 | 1.17362598 |
| LOC653489   | XM_934113.1 LOC653489    | PREDICTED: Homo sapiens s       | 0.00225248 | 0.00320936 | 1.17336278 |
| BBS2        | NM_031885.2 BBS2         | 16 Homo sapiens MGC20703; B     | 0.00826453 | 0.00976343 | 1.17332912 |
| FKBP14      | NM_017946.2 FKBP14       | 7 Homo sapiens FLJ20731; FK     | 0.0018687  | 0.00273403 | 1.17332194 |
| SF4         | NM_182812.1 SF4          | 19 Homo sapiens F23858; DKFZ    | 0.00081402 | 0.00135269 | 1.17328414 |
|             | Hs.475334 HS.475334      | 11 Human mRNA for KIAA0280      | 0.00374838 | 0.00495604 | 1.17312034 |
| SDHALP1     | XM_926458.1 SDHALP1      | Homo sapiens SDHAL1             | 0.03080209 | 0.02961402 | 1.17311903 |
| GORASP1     | NM_031899.2 GORASP1      | 3 Homo sapiens P65; GRASP65     | 0.01351203 | 0.01477684 | 1.1730852  |
| PGRMC2      | NM_006320.1 PGRMC2       | 4 Homo sapiens DG6; PMBP        | 0.00022468 | 0.00046168 | 1.17300163 |
| ITGB1       | NM_002211.2 ITGB1        | 10 Homo sapiens GPIIA; VLAB;    | 8.8976E-06 | 3.4574E-05 | 1.17264796 |
| MAP1S       | NM_018174.4 MAP1S        | 19 Homo sapiens VCY2IP-1; C19   | 0.00257508 | 0.00358403 | 1.17250704 |
| VAT1        | NM_006373.2 VAT1         | 17 Homo sapiens FLJ20230; VA    | 0.00012809 | 0.00029229 | 1.17234957 |
| CMAS        | NM_018686.3 CMAS         | 12 Homo sapiens cytidine mono   | 4.2743E-05 | 0.00012009 | 1.17223436 |
| CCBE1       | NM_133459.1 CCBE1        | 18 Homo sapiens FLJ30681; MG    | 0.00033071 | 0.00063758 | 1.1720124  |
| SUCLG1      | NM_003849.1 SUCLG1       | 2 Homo sapiens FLJ21114; SU     | 6.1764E-06 | 2.6154E-05 | 1.17197827 |
| ARIH2       | NM_006321.1 ARIH2        | 3 Homo sapiens FLJ10938; TRJ    | 1.432E-05  | 5.0663E-05 | 1.17177933 |
| PRAGMIN     | NM_00108082 PRAGMIN      | 8 Homo sapiens DKFZp761P04      | 0.00012621 | 0.00028882 | 1.17136793 |
| GALNTL4     | NM_198516.1 GALNTL4      | 11 Homo sapiens GALNT18; MG     | 0.01491383 | 0.01604586 | 1.17133895 |
| C17orf62    | NM_00103304 C17ORF62     | 17 Homo sapiens MGC4368; FLJ    | 0.0266993  | 0.02636575 | 1.17099467 |
| CDK10       | NM_00109853 CDK10        | 16 Homo sapiens PISSLRE         | 0.00246176 | 0.00345315 | 1.17067051 |
| NCBP2       | NM_007362.3 NCBP2        | 3 Homo sapiens PIG5; CBP20      | 1.6946E-05 | 5.7988E-05 | 1.17037849 |
| CTSA        | NM_000308.1 CTSA         | 20 Homo sapiens NGBE; PPCA; I   | 0.0216322  | 0.02205449 | 1.17013245 |
| C15orf24    | NM_020154.2 C15ORF24     | 15 Homo sapiens C11orf3; HT02   | 9.9455E-06 | 3.7841E-05 | 1.17011623 |
| PFKFB3      | NM_004566.2 PFKFB3       | 10 Homo sapiens PFK2; IPFK2     | 0.00020889 | 0.00043503 | 1.17010504 |
| EID2B       | NM_152361.1 EID2B        | 19 Homo sapiens EID-3; FLJ389   | 0.0008729  | 0.00143156 | 1.17003101 |
| DPYSL2      | NM_001386.4 DPYSL2       | 8 Homo sapiens DHPRP2; DRP-     | 9.7439E-06 | 3.7236E-05 | 1.16956344 |
| PTCD1       | NM_015545.2 PTCD1        | 7 Homo sapiens KIAA0632         | 0.00013596 | 0.00030643 | 1.16946997 |
| CD68        | NM_001251.2 CD68         | 17 Homo sapiens DKFZp686M1E     | 0.0198707  | 0.02049918 | 1.16940774 |
| SF3B5       | NM_031287.2 SF3B5        | 6 Homo sapiens SF3b10; MGC:     | 0.00012963 | 0.00029488 | 1.16924943 |
| PRKCA       | NM_002737.2 PRKCA        | 17 Homo sapiens MGC129901; I    | 0.00183592 | 0.0026928  | 1.16920462 |
| FGF19       | NM_005117.2 FGF19        | 11 Homo sapiens fibroblast grov | 0.00415007 | 0.00541937 | 1.1688817  |
| GYG1        | NM_004130.2 GYG1         | 3 Homo sapiens GYG              | 4.6537E-05 | 0.00012881 | 1.16857444 |
| ARHGEF10    | NM_014629.2 ARHGEF10     | 8 Homo sapiens GEF10; DKFZ:     | 0.00013281 | 0.00030063 | 1.16842818 |
| HSD17B4     | NM_000414.1 HSD17B4      | 5 Homo sapiens MFE-2            | 0.00017442 | 0.00037582 | 1.16830075 |
| VPS41       | NM_014396.2 VPS41        | 7 Homo sapiens HVSP41           | 0.0100514  | 0.0115192  | 1.16778439 |
| NTHL1       | NM_002528.4 NTHL1        | 16 Homo sapiens NTH1; OCTS3     | 0.01504075 | 0.01616655 | 1.16770853 |
| HIST3H2A    | NM_033445.2 HIST3H2A     | 1 Homo sapiens MGC3165          | 0.02020523 | 0.02080271 | 1.16761205 |
| LOC90586    | XR_000544.1 LOC90586     | 17 PREDICTED: Homo sapiens A    | 7.2747E-05 | 0.00018464 | 1.1676118  |
| UBE2O       | NM_022066.2 UBE2O        | 17 Homo sapiens E2-230K; KIA    | 0.00938965 | 0.01088882 | 1.16759265 |
| C19orf53    | NM_014047.1 C19ORF53     | 19 Homo sapiens HSPC023         | 3.9897E-06 | 1.8922E-05 | 1.16751181 |
| GCLM        | NM_002061.2 GCLM         | 1 Homo sapiens GCLLR            | 0.01532666 | 0.0164336  | 1.16739914 |
| RNF181      | NM_016494.3 RNF181       | 2 Homo sapiens HSPC238          | 7.2339E-06 | 2.9453E-05 | 1.16714664 |
| INTS3       | NM_023015.3 INTS3        | 1 Homo sapiens FLJ44849; C1c    | 0.0017083  | 0.00253315 | 1.16698165 |
| XPR1        | NM_004736.3 XPR1         | 1 Homo sapiens xenotropic anc   | 0.000591   | 0.0010346  | 1.1669741  |
| RALY        | NM_007367.2 RALY         | 20 Homo sapiens P542; MGC11:    | 0.00024243 | 0.00049296 | 1.16690354 |
| M6PR        | NM_002355.2 M6PR         | 12 Homo sapiens SMPR; FLJ329    | 0.0013031  | 0.0020154  | 1.16684116 |
| TMED9       | NM_017510.3 TMED9        | 5 Homo sapiens HSGP25L2G        | 1.6852E-05 | 5.7781E-05 | 1.16681765 |
| HSPA5       | NM_005347.2 HSPA5        | 9 Homo sapiens BIP; FLJ2610E    | 0.00059497 | 0.00104052 | 1.16657155 |
| ADNP2       | NM_014913.2 ADNP2        | 18 Homo sapiens KIAA0863; ZNP   | 0.00069389 | 0.0011792  | 1.16648723 |
| ZDHHC23     | NM_173570.2 ZDHHC23      | 3 Homo sapiens MGC42530; N:     | 0.01312049 | 0.01441332 | 1.16641419 |
| CGGBP1      | NM_003663.3 CGGBP1       | 3 Homo sapiens CGGBP; p20-C     | 0.00015216 | 0.00033602 | 1.16637104 |
| ARL16       | XM_290777.4 ARL16        | 17 Homo sapiens ADP-ribosylati  | 0.00084578 | 0.00139412 | 1.16625137 |
| RRP8        | NM_015324.2 RRP8         | 11 Homo sapiens RRP8            | 0.01355359 | 0.01481121 | 1.16586358 |
| PERP        | NM_022121.2 PERP         | 6 Homo sapiens THW; RP3-49E     | 3.1443E-05 | 9.3614E-05 | 1.16557938 |
| AP3D1       | NM_003938.4 AP3D1        | 19 Homo sapiens hBLVR; ADTD     | 0.00226271 | 0.00321976 | 1.16466393 |
| CHMP4A      | NM_014169.2 CHMP4A       | 14 Homo sapiens SNF7-1; C14o    | 0.00218281 | 0.00312176 | 1.16450116 |
| CCNK        | NM_003858.2 CCNK         | 14 Homo sapiens CPR4; MGC91     | 0.00018355 | 0.00039156 | 1.16417712 |
| LOC10013356 | XM_00172454 LOC100133565 | PREDICTED: Homo sapiens s       | 1.4615E-05 | 5.1519E-05 | 1.16397829 |
| IGFBP2      | NM_000597.2 IGFBP2       | 2 Homo sapiens IGF-BP53; IBF    | 0.00062689 | 0.00108595 | 1.16364624 |
| ATP6V1A     | NM_001690.2 ATP6V1A      | 3 Homo sapiens VA68; Vma1;      | 4.2067E-05 | 0.00011876 | 1.16337951 |
| SELK        | NM_021237.3 SELK         | 3 Homo sapiens HSPC297; MG      | 0.00955774 | 0.01104578 | 1.16317949 |
| APEH        | NM_001640.3 APEH         | 3 Homo sapiens D3S48E; APH;     | 9.2156E-06 | 3.5573E-05 | 1.16303164 |
| MGAT1       | NM_002406.2 MGAT1        | 5 Homo sapiens GLYT1; GLCT1     | 0.00048718 | 0.00088115 | 1.16237399 |
| API5        | NM_006595.2 API5         | 11 Homo sapiens AAC-11; AAC1    | 1.7719E-05 | 6.0004E-05 | 1.1622256  |
| TSPAN5      | NM_005723.2 TSPAN5       | 4 Homo sapiens TSPAN-5; TM4     | 0.00089812 | 0.00146661 | 1.16222118 |
| LOC399900   | NM_00101366 LOC399900    | 11 Homo sapiens hypothetical g  | 0.00027839 | 0.00055125 | 1.16206297 |
| ATP6V1H     | NM_213620.1 ATP6V1H      | 8 Homo sapiens SFDbeta; CGI-    | 0.00657844 | 0.00803442 | 1.16203527 |
| GNAI2       | NM_002070.2 GNAI2        | 3 Homo sapiens H_LUCA16.1;      | 0.00021104 | 0.00043878 | 1.16202682 |
| CIAO1       | NM_004804.2 CIAO1        | 2 Homo sapiens WDR39; CIA1      | 0.00036118 | 0.00068607 | 1.16187243 |
| PRCP        | NM_005040.2 PRCP         | 11 Homo sapiens HUMPCP; PCP;    | 3.8625E-06 | 1.8448E-05 | 1.16151722 |

## 5.0 ACL-Indepen Upreg

|             |             |              |    |                             |            |            |            |
|-------------|-------------|--------------|----|-----------------------------|------------|------------|------------|
| KLHDC5      | NM_020782.1 | KLHDC5       | 12 | Homo sapiens MGC131714; I   | 0.00074023 | 0.00124708 | 1.1614822  |
| ANKS1A      | NM_015245.1 | ANKS1A       | 6  | Homo sapiens ANKS1; KIAAC   | 0.00163235 | 0.00243535 | 1.16112158 |
| PTDSS2      | NM_030783.1 | PTDSS2       | 11 | Homo sapiens PSS2           | 0.00235679 | 0.00333147 | 1.16083427 |
| NCOA4       | NM_005437.1 | NCOA4        | 10 | Homo sapiens RFG; ARA70; I  | 1.028E-05  | 3.8944E-05 | 1.16057319 |
| LOC645452   | XM_939733.2 | LOC645452    |    | PREDICTED: Homo sapiens s   | 0.00012927 | 0.00029437 | 1.1595563  |
| DHX16       | NM_003587.3 | DHX16        | 6  | Homo sapiens DDX16; DBP2.   | 0.00038462 | 0.00072433 | 1.15946049 |
| DCTN3       | NM_024348.2 | DCTN3        | 9  | Homo sapiens MGC111190; I   | 0.00187397 | 0.00273992 | 1.15879096 |
| RHOG        | NM_001665.2 | RHOG         | 11 | Homo sapiens MGC125836; I   | 0.00033005 | 0.00063674 | 1.1586889  |
| ZMAT3       | NM_152240.1 | ZMAT3        | 3  | Homo sapiens PAG608; WIG:   | 0.00021706 | 0.00044854 | 1.15864569 |
| TP53BP1     | NM_005657.1 | TP53BP1      | 15 | Homo sapiens 53BP1; MGC1:   | 0.00143736 | 0.00218948 | 1.1585477  |
| MRPS33      | NM_016071.2 | MRPS33       | 7  | Homo sapiens FLJ21123; CG   | 0.00059344 | 0.00103826 | 1.15853873 |
| LOC728565   | XM_928286.1 | LOC728565    | 5  | PREDICTED: Homo sapiens s   | 0.02514592 | 0.0250973  | 1.1585369  |
| ARPC5L      | NM_030978.1 | ARPC5L       | 9  | Homo sapiens MGC3038; AR    | 0.00021513 | 0.00044528 | 1.15847129 |
| POFUT1      | NM_015352.1 | POFUT1       | 20 | Homo sapiens O-Fuc-T; O-FU  | 0.00052983 | 0.00094506 | 1.15805462 |
| LOC10019093 | NR_024462.1 | LOC10019093  | 17 | Homo sapiens hypothetical L | 0.00252713 | 0.0035268  | 1.15797059 |
| CEP27       | NM_018097.1 | CEP27        | 15 | Homo sapiens FLJ10460; C1!  | 0.00383475 | 0.00505804 | 1.15787906 |
| RNF167      | NM_015528.1 | RNF167       | 17 | Homo sapiens 5730408C10R    | 0.01335105 | 0.01462997 | 1.15759165 |
| LOC10012936 | XM_00172143 | LOC100129362 |    | PREDICTED: Homo sapiens h   | 0.00358748 | 0.00476701 | 1.15758811 |
| ITGB1BP1    | NM_004763.2 | ITGB1BP1     | 2  | Homo sapiens ICAP1B; ICAP-  | 0.00349806 | 0.00467011 | 1.1571789  |
| ATP5D       | NM_001687.4 | ATP5D        | 19 | Homo sapiens ATP synthase,  | 2.61E-05   | 8.0835E-05 | 1.15717311 |
| GPR172A     | NM_024531.3 | GPR172A      | 8  | Homo sapiens GPCR41; PAR1   | 1.7169E-05 | 5.8593E-05 | 1.15678806 |
| CD9         | NM_001769.2 | CD9          | 12 | Homo sapiens MRP-1; MIC3;   | 0.00130179 | 0.0020141  | 1.15670353 |
| HEXB        | NM_000521.2 | HEXB         | 5  | Homo sapiens ENC-1A5        | 3.1652E-06 | 1.5788E-05 | 1.15662451 |
| FOXC1       | NM_001453.1 | FOXC1        | 6  | Homo sapiens FREAC3; FKHL   | 3.8961E-06 | 1.8578E-05 | 1.1564722  |
| PTPLAD2     | NM_00101091 | PTPLAD2      | 9  | Homo sapiens DKFZp686F01    | 0.00354174 | 0.00472053 | 1.15639737 |
| RPUSD3      | NM_173659.2 | RPUSD3       | 3  | Homo sapiens FLJ34707; MG   | 0.0002399  | 0.00048848 | 1.15639128 |
|             | Hs.544637   | HS.544637    | 6  | xr14b10.x1 NCI_CGAP_Lu28    | 0.00446957 | 0.00575774 | 1.15629591 |
| TUBA4A      | NM_006000.1 | TUBA4A       | 2  | Homo sapiens TUBA1; H2-AL   | 0.00130131 | 0.0020137  | 1.15599373 |
| ZDHHC8      | NM_013373.2 | ZDHHC8       | 22 | Homo sapiens ZNF378; ZDHI   | 1.0963E-05 | 4.0914E-05 | 1.15595781 |
| DAP3        | NM_033657.1 | DAP3         | 1  | Homo sapiens MGC126059; I   | 1.7316E-05 | 5.8935E-05 | 1.15586199 |
| LOC255167   | NR_024424.1 | LOC255167    | 5  | Homo sapiens hypothetical L | 0.0001307  | 0.00029693 | 1.15563686 |
| WDR79       | NM_018081.1 | WDR79        | 17 | Homo sapiens WRAP53; FLJ1   | 0.02808028 | 0.0274759  | 1.15559589 |
| SLC25A11    | NM_003562.3 | SLC25A11     | 17 | Homo sapiens SLC20A4; OGC   | 0.04576283 | 0.04124531 | 1.1554817  |
| DUSP19      | NM_080876.2 | DUSP19       | 2  | Homo sapiens MGC138210; S   | 0.00573194 | 0.0071468  | 1.15547744 |
| CDC7        | NM_003503.2 | CDC7         | 1  | Homo sapiens HsCDC7; MGC    | 0.00047715 | 0.00086623 | 1.15537401 |
| FASTKD5     | NM_021826.4 | FASTKD5      | 20 | Homo sapiens FLJ13149; dJ1  | 0.01755944 | 0.01845993 | 1.15508657 |
| C7orf50     | NM_032350.3 | C7ORF50      | 7  | Homo sapiens MGC11257; YC   | 1.572E-05  | 5.4582E-05 | 1.15490512 |
| NLRP8       | NM_176811.2 | NLRP8        | 19 | Homo sapiens CLR19.2; NAL   | 0.00042255 | 0.00078331 | 1.15485711 |
|             | Hs.57079    | HS.57079     | 10 | Homo sapiens cDNA FLJ1326   | 0.0001681  | 0.00036445 | 1.15475389 |
| BSG         | NM_001728.2 | BSG          | 19 | Homo sapiens EMMPRIN; OK    | 2.8846E-05 | 8.7456E-05 | 1.15468947 |
| PAQR4       | NM_152341.2 | PAQR4        | 16 | Homo sapiens FLJ30002       | 0.00113998 | 0.00179798 | 1.15466473 |
| ZNF791      | NM_153358.1 | ZNF791       | 19 | Homo sapiens MGC126179; I   | 0.04607998 | 0.04147576 | 1.15458353 |
| LCOR        | NM_032440.1 | LCOR         | 10 | Homo sapiens FLJ38026; MLI  | 0.00079119 | 0.00132    | 1.15404944 |
| OAT         | NM_000274.1 | OAT          | 10 | Homo sapiens HOGA; DKFZp    | 2.0578E-05 | 6.7495E-05 | 1.15376399 |
| PRPF19      | NM_014502.3 | PRPF19       | 11 | Homo sapiens NMG200; PRP1   | 0.00301842 | 0.00410662 | 1.15297866 |
| POMP        | NM_015932.2 | POMP         | 13 | Homo sapiens UMP1; HSPCO:   | 1.277E-05  | 4.6165E-05 | 1.15252152 |
| DDX24       | NM_020414.3 | DDX24        | 14 | Homo sapiens DEAD (Asp-Glu  | 5.0259E-05 | 0.00013725 | 1.15231748 |
| TIPRL       | NM_152902.3 | TIPRL        | 1  | Homo sapiens RP1-69E11.1;   | 0.03533428 | 0.0332215  | 1.15229366 |
| FAM120AOS   | NM_198841.2 | FAM120AOS    | 9  | Homo sapiens C9orf100S; FL  | 0.00533888 | 0.00672168 | 1.15228365 |
| MGC61598    | XM_939432.1 | MGC61598     |    | PREDICTED: Homo sapiens s   | 0.00707834 | 0.00854034 | 1.15139871 |
| NOSIP       | NM_015953.3 | NOSIP        | 19 | Homo sapiens CGI-25         | 7.9995E-07 | 5.7063E-06 | 1.15118137 |
| ZNF770      | NM_014106.2 | ZNF770       | 15 | Homo sapiens FLJ20582; PR   | 0.00461254 | 0.00591932 | 1.15101847 |
| PREPL       | NM_006036.3 | PREPL        | 2  | Homo sapiens FLJ16627; KIA  | 0.01796122 | 0.01879448 | 1.15090849 |
| LOC648390   | XR_037845.1 | LOC648390    | 2  | PREDICTED: Homo sapiens n   | 3.2454E-05 | 9.6102E-05 | 1.15080537 |
| ADCY6       | NM_020983.2 | ADCY6        | 12 | Homo sapiens KIAA0422; DK   | 0.05601155 | 0.04878838 | 1.15076869 |
| DCAF7       | NM_005828.2 | DCAF7        | 17 | Homo sapiens AN11; HAN11    | 8.7765E-05 | 0.000216   | 1.15051854 |
| C19orf22    | NM_138774.2 | C19ORF22     | 19 | Homo sapiens MGC16353       | 0.00031363 | 0.00060975 | 1.15042348 |
| MRPL41      | NM_032477.1 | MRPL41       | 9  | Homo sapiens MRP-L27; RPM   | 5.1676E-05 | 0.00014033 | 1.15032109 |
| RNF103      | NM_005667.2 | RNF103       | 2  | Homo sapiens MGC41857; hl   | 0.01733331 | 0.01827255 | 1.15030652 |
| TMEM66      | NM_016127.4 | TMEM66       | 8  | Homo sapiens FLJ22274; FO   | 6.0385E-06 | 2.5769E-05 | 1.15025214 |
| MIR1978     | NR_031742.1 | MIR1978      |    | Homo sapiens microRNA 197   | 4.4115E-06 | 2.0436E-05 | 1.15012782 |
| HIATL2      | NR_002894.1 | HIATL2       | 9  | Homo sapiens FLJ45467; MG   | 0.00232502 | 0.00329559 | 1.14997472 |
| SF3B14      | NM_016047.3 | SF3B14       | 2  | Homo sapiens Ht006; SF3B1-  | 7.7817E-06 | 3.1233E-05 | 1.14996746 |
| SHOC2       | NM_007373.2 | SHOC2        | 10 | Homo sapiens SUR8; SIAA08   | 0.01840404 | 0.01917779 | 1.14947898 |
| QRFPR       | NM_198179.2 | QRFPR        | 4  | Homo sapiens SP9155; MGC:   | 0.00068389 | 0.00116559 | 1.14947632 |
| ZNF14       | NM_021030.2 | ZNF14        | 19 | Homo sapiens GIOT-4; KOX6   | 0.00025631 | 0.00051651 | 1.14925015 |
| METTL13     | NM_015935.4 | METTL13      | 1  | Homo sapiens FLJ10310; CG   | 0.00272872 | 0.00376265 | 1.14912327 |
| C9orf5      | NM_032012.1 | C9ORF5       | 9  | Homo sapiens CG2; FLJ3322   | 0.0048897  | 0.00622854 | 1.14877411 |
| DNAJC10     | NM_018981.1 | DNAJC10      | 2  | Homo sapiens DKFZp434J18:   | 0.00595712 | 0.00738767 | 1.14826666 |
| FAM46A      | NM_017633.1 | FAM46A       | 6  | Homo sapiens XTP11; C6orf3  | 0.00019984 | 0.00041928 | 1.14819207 |



## 5.0 ACL-Indepen Upreg

|             |             |              |   |              |                           |                |            |            |
|-------------|-------------|--------------|---|--------------|---------------------------|----------------|------------|------------|
| GLA         | NM_000169.1 | GLA          | X | Homo sapiens | GALA                      | 0.00014856     | 0.00032941 | 1.14765196 |
| SMUG1       | NM_014311.1 | SMUG1        |   | 12           | Homo sapiens              | UNG3; MGC10    | 0.00018799 | 0.00039947 |
| RAP1GAP     | NM_002885.1 | RAP1GAP      |   | 1            | Homo sapiens              | KIAA0474; Ra   | 0.00274338 | 0.0037793  |
|             | Hs.516646   | Hs.516646    |   | 2            | Homo sapiens              | cDNA FLJ4437   | 0.03046749 | 0.02936634 |
|             |             |              |   | 3            | Homo sapiens              | KIAA0199       | 4.2171E-05 | 0.00011897 |
| SCAP        | NM_012235.2 | SCAP         |   | 13           | Homo sapiens              | P76; MGC117:   | 2.4906E-05 | 7.8045E-05 |
| TM9SF2      | NM_004800.1 | TM9SF2       |   | 21           | Homo sapiens              | DCRA; MGC11    | 0.00601238 | 0.00744883 |
| DSCR3       | NM_006052.1 | DSCR3        |   | 5            | Homo sapiens              | ORF1-FL49      | 0.00307657 | 0.00417667 |
| C5orf32     | NM_032412.2 | C5ORF32      |   | 2            | Homo sapiens              | FLJ21864; MG   | 3.437E-05  | 0.00010113 |
| PSME4       | NM_014614.1 | PSME4        |   | 5            | Homo sapiens              | RINCK; MGC3:   | 0.00090546 | 0.0014764  |
| TRIM41      | NM_033549.3 | TRIM41       |   | 17           | Homo sapiens              | COPS1; CSN1:   | 2.0901E-05 | 6.8351E-05 |
| GPS1        | NM_004127.4 | GPS1         |   | 9            | Homo sapiens              | HIT-17         | 0.00751185 | 0.00898431 |
| HINT2       | NM_032593.2 | HINT2        |   | 1            | Homo sapiens              | GST-III        | 3.9346E-06 | 1.8742E-05 |
| MGST3       | NM_004528.2 | MGST3        |   | 16           | Homo sapiens              | MGC19600; Rl   | 0.00037643 | 0.00071182 |
| RPUSD1      | NM_058192.2 | RPUSD1       |   | 17           | Homo sapiens              | chromosome 1   | 0.00214291 | 0.00307472 |
| C17orf96    | NM_00113067 | C17ORF96     |   | 1            | Homo sapiens              | TIP-B1; SH3B   | 0.01480543 | 0.01594879 |
| SH3BGRL3    | NM_031286.2 | SH3BGRL3     |   | 12           | Homo sapiens              | ATG8L; GEC1;   | 0.01443701 | 0.01561903 |
| GABARAPL1   | NM_031412.2 | GABARAPL1    |   | 14           | Homo sapiens              | BMP2B1; BMP:   | 0.00216887 | 0.00310587 |
| BMP4        | NM_001202.2 | BMP4         |   | 16           | Homo sapiens              | SIII           | 5.1062E-06 | 2.2685E-05 |
| TCEB2       | NM_007108.2 | TCEB2        |   | 17           | Homo sapiens              | HERG2; ERG2    | 5.6737E-05 | 0.00015103 |
| KCNH6       | NM_030779.2 | KCNH6        |   | 15           | Homo sapiens              | FLJ22858       | 0.03499603 | 0.03293523 |
| CLK3        | NM_003992.1 | CLK3         |   | 2            | Homo sapiens              | MGC46235       | 0.00353751 | 0.00471633 |
| TTL         | NM_153712.3 | TTL          |   | 5            | Homo sapiens              | KIAA0799; MC   | 0.01932353 | 0.02000763 |
| MYO10       | NM_012334.1 | MYO10        |   | 3            | Homo sapiens              | BBP; DKFZp5E   | 1.9507E-05 | 6.4784E-05 |
| TMEM158     | NM_015444.1 | TMEM158      |   | 11           | Homo sapiens              | HREV107-3; H   | 0.01230042 | 0.01365088 |
| HRASLS3     | NM_007069.1 | HRASLS3      |   | 2            | Homo sapiens              | MGC10367; Al   | 0.00045332 | 0.00082742 |
| BIN1        | NM_139343.1 | BIN1         |   | 11           | Homo sapiens              | HSPC321; FLJ   | 0.0061686  | 0.00762192 |
| SWAP70      | NM_015055.1 | SWAP70       |   | 3            | Homo sapiens              | FLJ90470       | 0.00031169 | 0.00060665 |
| TOMM70A     | NM_014820.3 | TOMM70A      |   | 7            | Homo sapiens              | MGC111202; \   | 2.3597E-05 | 7.4934E-05 |
| BUD31       | NM_003910.2 | BUD31        |   | 15           | Homo sapiens              | PSL2; IMP3     | 0.00090589 | 0.00147683 |
| SPPL2A      | NM_032802.2 | SPPL2A       |   | 3            | Homo sapiens              | MGC27385       | 0.00749272 | 0.00896755 |
| KCTD6       | NM_153331.2 | KCTD6        |   | 8            | Homo sapiens              | IMPA           | 0.00277125 | 0.00381291 |
| IMPA1       | NM_005536.2 | IMPA1        |   | 16           | Homo sapiens              | CHMP1A; CHM    | 0.00066199 | 0.00113377 |
| CHMP1A      | NM_002768.1 | CHMP1A       |   | 19           | Homo sapiens              | UBE2R1; UBC:   | 0.00264808 | 0.0036705  |
| CDC34       | NM_004359.1 | CDC34        |   | 22           | Homo sapiens              | DMC1H; HsLin   | 0.00033411 | 0.00064328 |
| DMC1        | NM_007068.2 | DMC1         |   |              | Homo sapiens              | FLJ20772; TRI  | 0.00540497 | 0.00679416 |
| TRMT12      | NM_017956.1 | TRMT12       |   | 5            | Homo sapiens              | LCB            | 0.00021784 | 0.00045005 |
| CLTB        | NM_001834.2 | CLTB         |   | 22           | Homo sapiens              | DKFZp667005    | 9.3655E-05 | 0.00022762 |
| CRELD2      | NM_024324.2 | CRELD2       |   | 13           | Homo sapiens              | FLJ34588; FLJ  | 3.6541E-05 | 0.00010616 |
| EFHA1       | NM_152726.1 | EFHA1        |   | 4            | Homo sapiens              | NOA36; HSA6:   | 0.00574061 | 0.00715457 |
| ZNF330      | NM_014487.2 | ZNF330       |   | 5            | Homo sapiens              | MGC13017       | 6.4946E-07 | 4.9082E-06 |
| CDKN2AIPNL  | NM_080656.1 | CDKN2AIPNL   |   | 6            | Homo sapiens              | EVI16          | 0.00049186 | 0.00088852 |
| SOX4        | NM_003107.2 | SOX4         |   | 20           | Homo sapiens              | Rpn13; GP110   | 1.5275E-05 | 5.3288E-05 |
| ADRM1       | NM_175573.1 | ADRM1        |   | 15           | Homo sapiens              | D15F37S1; p5   | 0.01824898 | 0.01904335 |
| HERC2       | NM_004667.3 | HERC2        |   | 6            | Homo sapiens              | HS11; bA513I   | 3.7619E-05 | 0.00010858 |
| CYCSL1      | NR_001561.1 | CYCSL1       |   | 22           | Homo sapiens              | ASC1p100       | 0.00068726 | 0.00116951 |
| ASCC2       | NM_032204.3 | ASCC2        |   |              | PREDICTED: Homo sapiens h | 0.00300559     | 0.00409234 |            |
| LOC10013364 | XM_00172510 | LOC100133649 |   | 6            | Homo sapiens              | FLJ25321; KIA  | 0.00029795 | 0.0005847  |
| PSMB1       | NM_002793.2 | PSMB1        |   | 6            | Homo sapiens              | RNF1           | 2.0839E-06 | 1.1587E-05 |
| RING1       | NM_002931.3 | RING1        |   | 1            | Homo sapiens              | FLJ20430; MG   | 0.00061466 | 0.00106771 |
| WDR8        | NM_017818.2 | WDR8         |   | 9            | Homo sapiens              | hypothetical p | 0.00189977 | 0.0027721  |
| FLJ46309    | XM_941608.1 | FLJ46309     |   | 19           | Homo sapiens              | M7V1; ATBO;    | 0.00136744 | 0.00209828 |
| SLC1A5      | NM_005628.1 | SLC1A5       |   | 10           | PREDICTED: Homo sapiens h | 0.01864259     | 0.01939413 |            |
| LOC10013005 | XM_00172129 | LOC10013005  |   | 8            | Homo sapiens              | FLJ25692       | 0.00028049 | 0.00055503 |
| C8orf45     | NM_173518.2 | C8ORF45      |   | 12           | Homo sapiens              | DKFZp686N20    | 0.00240519 | 0.00339007 |
| DDX51       | NM_175066.2 | DDX51        |   | 3            | Homo sapiens              | LH2; TLH       | 0.00423275 | 0.00550276 |
| PLOD2       | NM_182943.2 | PLOD2        |   | 10           | Homo sapiens              | VIP32; PP539!  | 0.00235118 | 0.0033257  |
| AVPI1       | NM_021732.1 | AVPI1        |   | 3            | Homo sapiens              | PRO1080; HEI   | 1.9225E-05 | 6.4014E-05 |
| DNAJB11     | NM_016306.4 | DNAJB11      |   | 19           | Homo sapiens              | FLJ34917       | 0.00466504 | 0.00597621 |
| ZNF549      | NM_153263.1 | ZNF549       |   | 5            | Homo sapiens              | 4-PH alpha 2   | 0.02457923 | 0.02465792 |
| P4HA2       | NM_00101797 | P4HA2        |   | 16           | Homo sapiens              | FLJ20040       | 0.00291051 | 0.00397707 |
| KCTD5       | XR_001518.1 | KCTD5        |   | 2            | Homo sapiens              | FLAP; ALP      | 5.9129E-05 | 0.00015561 |
| ALPP        | NM_001632.2 | ALPP         |   |              | PREDICTED: Homo sapiens h | 2.6312E-06     | 1.3783E-05 |            |
| LOC401115   | XM_937968.1 | LOC401115    |   | 12           | Homo sapiens              | G6S; MGC212    | 5.1183E-05 | 0.00013934 |
| GENS        | NM_002076.2 | GENS         |   | 2            | Homo sapiens              | PI7; GDN; PNI  | 1.9259E-06 | 1.093E-05  |
| SERPINE2    | NM_006216.2 | SERPINE2     |   | 11           | Homo sapiens              | DKFZp686L17    | 0.00418201 | 0.00544891 |
| SIDT2       | NM_015996.1 | SIDT2        |   | 20           | Homo sapiens              | dJ742J24.1; K  | 0.0265213  | 0.02623426 |
| BTBD3       | NM_181443.1 | BTBD3        |   | 11           | Homo sapiens              | TAF2H; TAF2A   | 0.00024331 | 0.00049439 |
| TAF10       | NM_006284.2 | TAF10        |   | 16           | Homo sapiens              | Nomo; PM5      | 0.01834646 | 0.01912688 |
| NOMO1       | NM_014287.3 | NOMO1        |   | 17           | Homo sapiens              | KIAA0924; DK   | 0.00265036 | 0.00367308 |
| ZNF652      | NM_014897.1 | ZNF652       |   |              |                           |                |            | 1.13431194 |

## 5.0 ACL-Indepen Upreg

|             |             |              |    |                             |            |            |            |
|-------------|-------------|--------------|----|-----------------------------|------------|------------|------------|
| MAP2K2      | NM_030662.2 | MAP2K2       | 19 | Homo sapiens PRKMK2; MAP    | 0.03376302 | 0.03194271 | 1.13425352 |
| TMEM160     | NM_017854.1 | TMEM160      | 19 | Homo sapiens FLJ20512       | 0.00036758 | 0.00069673 | 1.13420138 |
| LOC653086   | XM_930963.1 | LOC653086    | 2  | PREDICTED: Homo sapiens s   | 0.00824637 | 0.00974591 | 1.13411973 |
| MGC10997    | NR_001565.1 | MGC10997     | 15 | Homo sapiens pseudogene M   | 0.00057321 | 0.00101072 | 1.13393004 |
| CKLF        | NM_016326.2 | CKLF         | 16 | Homo sapiens UCK-1; CKLF1   | 0.00041997 | 0.00077953 | 1.13382104 |
| DDX50       | NM_024045.1 | DDX50        | 10 | Homo sapiens RH-II/GuB; Gl  | 0.04792458 | 0.04285906 | 1.13365668 |
| MAN1B1      | NM_016219.2 | MAN1B1       | 9  | Homo sapiens MANA-ER        | 0.00139549 | 0.00213459 | 1.13357658 |
| LRRC37B2    | NR_015344.1 | LRRC37B2     |    | Homo sapiens DKFZp667M24    | 0.00090747 | 0.00147886 | 1.13348375 |
| CCDC125     | NM_176816.3 | CCDC125      | 5  | Homo sapiens KENAE          | 0.00677206 | 0.00823079 | 1.13308785 |
| LOC646996   | NR_003543.1 | LOC646996    | 14 | Homo sapiens hCG2040201 (   | 0.00277996 | 0.0038219  | 1.13248317 |
| CHMP1B      | NM_020412.3 | CHMP1B       | 18 | Homo sapiens C10orf2; C18-  | 0.00104365 | 0.00166733 | 1.13220508 |
| SPEN        | NM_015001.2 | SPEN         | 1  | Homo sapiens RP1-134O19.1   | 0.00069783 | 0.00118498 | 1.13216515 |
| TMED3       | NM_007364.2 | TMED3        | 15 | Homo sapiens MGC133022; (   | 4.3643E-05 | 0.00012207 | 1.13205498 |
| SAP30L      | NM_024632.3 | SAP30L       | 5  | Homo sapiens FLJ11526; NS-  | 0.00894281 | 0.01044796 | 1.13195243 |
| EDF1        | NM_003792.2 | EDF1         | 9  | Homo sapiens EDF-1; MBF1;   | 1.8961E-05 | 6.3353E-05 | 1.13192994 |
| LOC654121   | XM_942442.1 | LOC654121    |    | PREDICTED: Homo sapiens s   | 4.2087E-05 | 0.00011877 | 1.13188378 |
| CORO1C      | NM_014325.2 | CORO1C       | 12 | Homo sapiens HCRNN4; coro   | 0.00268424 | 0.00371123 | 1.13186276 |
| TMEM17      | NM_198276.1 | TMEM17       | 2  | Homo sapiens FLJ34583       | 0.00661423 | 0.00806577 | 1.13178182 |
| PDXP        | NM_020315.3 | PDXP         | 22 | Homo sapiens CIN; FLJ3270:  | 5.5501E-05 | 0.00014851 | 1.13173696 |
| GMFB        | NM_004124.2 | GMFB         | 14 | Homo sapiens GMF            | 0.00069081 | 0.00117487 | 1.13152151 |
| TST         | NM_003312.4 | TST          | 22 | Homo sapiens MGC19578; RI   | 3.1174E-05 | 9.3003E-05 | 1.13141339 |
| RNASEK      | NM_00100433 | RNASEK       | 17 | Homo sapiens MGC71993       | 7.6622E-05 | 0.00019274 | 1.1312767  |
| EVL         | NM_016337.2 | EVL          | 14 | Homo sapiens RN86           | 0.00252806 | 0.00352754 | 1.13126672 |
| AKR1B1      | NM_001628.2 | AKR1B1       | 7  | Homo sapiens ALDR1; MGC1    | 0.0003163  | 0.00061412 | 1.13095704 |
| CYB5R3      | NM_007326.2 | CYB5R3       | 22 | Homo sapiens DIA1; B5R      | 2.9671E-05 | 8.9278E-05 | 1.1309373  |
| HCG2P7      | NR_001318.1 | HCG2P7       | 6  | Homo sapiens HCGII-7; HCG   | 2.4121E-05 | 7.6072E-05 | 1.13076866 |
| ELP3        | NM_018091.3 | ELP3         | 8  | Homo sapiens FLJ10422; KA'  | 0.00870409 | 0.01020167 | 1.13055916 |
| LOC729603   | NR_003288.1 | LOC729603    | 6  | Homo sapiens calcium bindin | 8.8864E-05 | 0.0002181  | 1.13049449 |
| RER1        | NM_007033.3 | RER1         | 1  | Homo sapiens RP4-740C4.2    | 0.01529752 | 0.01641037 | 1.13016925 |
| DHX40       | XM_942276.1 | DHX40        |    | PREDICTED: Homo sapiens C   | 0.00502305 | 0.00637527 | 1.13014421 |
| LOC10013351 | XM_00171450 | LOC100133516 |    | PREDICTED: Homo sapiens h   | 0.0026961  | 0.00372411 | 1.12990662 |
| AP1M1       | NM_032493.2 | AP1M1        | 19 | Homo sapiens MU-1A; CLAPM   | 0.0005719  | 0.00100923 | 1.12948546 |
| RAB26       | NM_014353.4 | RAB26        | 16 | Homo sapiens V46133         | 0.00167951 | 0.00249425 | 1.12920465 |
| ITPKA       | NM_002220.1 | ITPKA        | 15 | Homo sapiens IP3KA          | 0.0154171  | 0.0165104  | 1.1291538  |
| C17orf61    | NM_152766.2 | C17ORF61     | 17 | Homo sapiens MGC40107       | 8.4595E-06 | 3.3254E-05 | 1.12895036 |
| PMM1        | NM_002676.1 | PMM1         | 22 | Homo sapiens Sec53          | 0.00593739 | 0.00736633 | 1.12875291 |
| MRPS11      | NM_176805.1 | MRPS11       | 15 | Homo sapiens HCC-2; FLJ22!  | 0.00112653 | 0.0017803  | 1.12860868 |
| SAR1B       | NM_00103350 | SAR1B        | 5  | Homo sapiens CMRD; SARA2    | 0.02857519 | 0.02784835 | 1.12858193 |
| PAPSS1      | NM_005443.4 | PAPSS1       | 4  | Homo sapiens SK1; PAPSS; /  | 0.00050942 | 0.00091386 | 1.12822004 |
| DTWD2       | NM_173666.1 | DTWD2        | 5  | Homo sapiens MGC138579; I   | 0.01492676 | 0.01605583 | 1.12728276 |
| HMG20B      | NM_006339.1 | HMG20B       | 19 | Homo sapiens SMARCE1r; FL   | 9.0844E-05 | 0.00022165 | 1.12687163 |
| CRCP        | NM_014478.4 | CRCP         | 7  | Homo sapiens MGC111194; (   | 0.00653735 | 0.00799647 | 1.12686234 |
| ZNF486      | XM_371152.2 | ZNF486       | 19 | PREDICTED: Homo sapiens z   | 0.00160709 | 0.00240378 | 1.12683073 |
| PTRF        | NM_012232.2 | PTRF         | 17 | Homo sapiens FKSG13         | 0.00011316 | 0.00026421 | 1.12679316 |
| LOC400446   | XR_019205.2 | LOC400446    |    | PREDICTED: Homo sapiens n   | 0.03972225 | 0.0366211  | 1.12635326 |
| IKBKKG      | NM_003639.2 | IKBKKG       |    | Homo sapiens IPD2; FIP3; NI | 0.04052655 | 0.03720234 | 1.12628773 |
| GTF3C5      | NM_012087.1 | GTF3C5       | 9  | Homo sapiens TFIIC63; FLJ;  | 0.01136645 | 0.01278908 | 1.12627151 |
| FSCN1       | NM_003088.2 | FSCN1        | 7  | Homo sapiens FLJ38511; SN   | 2.0049E-05 | 6.6082E-05 | 1.12597193 |
| EHD4        | NM_139265.2 | EHD4         | 15 | Homo sapiens PAST4          | 0.00667821 | 0.00813475 | 1.12555793 |
| COX6A1      | NM_004373.2 | COX6A1       | 12 | Homo sapiens COX6AL; COX    | 5.3878E-05 | 0.00014496 | 1.12554685 |
| HARS        | NM_002109.3 | HARS         | 5  | Homo sapiens FLJ20491; HR   | 8.9307E-05 | 0.00021894 | 1.1255453  |
| CLCN7       | NM_001287.3 | CLCN7        | 16 | Homo sapiens CLC-7; FLJ396  | 0.00033117 | 0.00063834 | 1.12552239 |
| CENPB       | NM_001810.5 | CENPB        | 20 | Homo sapiens centromere pr  | 0.00325965 | 0.00438922 | 1.12547027 |
| ATG12       | NM_004707.2 | ATG12        | 5  | Homo sapiens APG12L; HAPC   | 0.00578326 | 0.00719953 | 1.12528966 |
| MGEA5       | NM_012215.1 | MGEA5        | 10 | Homo sapiens MEA5; FLJ233   | 5.2973E-05 | 0.00014297 | 1.12515848 |
| RPS4Y1      | NM_001008.3 | RPS4Y1       |    | Homo sapiens RPS4Y; MGC1:   | 8.4037E-05 | 0.00020817 | 1.12504042 |
| TAGLN2      | NM_003564.1 | TAGLN2       | 1  | Homo sapiens KIAA0120; HA   | 0.00527191 | 0.0066469  | 1.12494445 |
| C21orf24    | NM_00100178 | C21ORF24     | 21 | Homo sapiens chromosome 2   | 0.00038285 | 0.00072162 | 1.12491556 |
| RASSF7      | NM_003475.2 | RASSF7       | 11 | Homo sapiens C11orf13; HR(  | 0.00101259 | 0.00162541 | 1.12489438 |
| MAGT1       | NM_032121.3 | MAGT1        |    | Homo sapiens RP11-217H1.1   | 0.01448918 | 0.01566581 | 1.12485684 |
| SDHA        | NM_004168.1 | SDHA         | 5  | Homo sapiens SDHF; SDH2;    | 0.00042393 | 0.00078571 | 1.12480066 |
| UBE2L6      | NM_198183.1 | UBE2L6       | 11 | Homo sapiens UBCH8; RIG-E   | 0.05764264 | 0.04994632 | 1.12459764 |
| PIP5K2B     | NM_138687.1 | PIP5K2B      | 17 | Homo sapiens Pip4k2B; PIP5  | 0.00158198 | 0.00237027 | 1.12444633 |
| DYNC1LI2    | NM_006141.2 | DYNC1LI2     | 16 | Homo sapiens DNCL12; LIC2   | 0.00011204 | 0.000262   | 1.12429187 |
| NIPA1       | NM_144599.3 | NIPA1        | 15 | Homo sapiens SPG6; FSP3; M  | 0.00226873 | 0.00322675 | 1.12392534 |
| CDC2L6      | NM_015076.3 | CDC2L6       | 6  | Homo sapiens bA346C16.3; (  | 0.0401967  | 0.0369653  | 1.12376345 |
| FLJ35390    | NR_024416.1 | FLJ35390     | 7  | Homo sapiens hypothetical L | 0.0004427  | 0.0008126  | 1.12375976 |
| LOC202781   | XM_00171439 | LOC202781    |    | PREDICTED: Homo sapiens h   | 0.0014748  | 0.00223835 | 1.12361506 |
| GEMIN6      | NM_024775.9 | GEMIN6       | 2  | Homo sapiens FLJ23459       | 0.00260709 | 0.0036217  | 1.12361287 |
| KRT10       | NM_000421.2 | KRT10        | 17 | Homo sapiens K10; KPP; CK1  | 0.0080993  | 0.00958889 | 1.123382   |

## 5.0 ACL-Indepen Upreg

|             |             |              |    |                             |            |            |            |
|-------------|-------------|--------------|----|-----------------------------|------------|------------|------------|
| ANXA5       | NM_001154.2 | ANXA5        | 4  | Homo sapiens PP4; ANX5; EI  | 6.8166E-06 | 2.8305E-05 | 1.12328914 |
| LOC10013323 | XM_00171803 | LOC100133233 |    | PREDICTED: Homo sapiens h   | 0.00013983 | 0.00031362 | 1.12320868 |
| PSMD6       | NM_014814.1 | PSMD6        | 3  | Homo sapiens KIAA0107; S1   | 6.1566E-06 | 2.6121E-05 | 1.12318583 |
| CDC37       | NM_007065.3 | CDC37        | 19 | Homo sapiens P50CDC37       | 1.0828E-05 | 4.0462E-05 | 1.12313992 |
| CHMP5       | NM_016410.2 | CHMP5        | 9  | Homo sapiens C9orf83; SNF7  | 6.5477E-05 | 0.00016917 | 1.12305958 |
| ZNF738      | XR_040185.1 | ZNF738       | 19 | PREDICTED: Homo sapiens n   | 0.00172424 | 0.00255333 | 1.1230468  |
| YRDC        | NM_024640.3 | YRDC         | 1  | Homo sapiens FLJ23476; IRI  | 0.00490674 | 0.00624753 | 1.12288989 |
| ANKRD19     | NM_00101092 | ANKRD19      |    | Homo sapiens FLJ36178; bA!  | 0.01271056 | 0.01403328 | 1.12285789 |
| SEMA4D      | NM_006378.2 | SEMA4D       | 9  | Homo sapiens SEMAJ; M-serr  | 0.00830189 | 0.00980228 | 1.12281263 |
| SERBP1      | NM_00101806 | SERBP1       | 1  | Homo sapiens CGI-55; FLJ9C  | 0.01001341 | 0.01148617 | 1.12267599 |
| LOC731542   | XR_015517.2 | LOC731542    |    | PREDICTED: Homo sapiens n   | 9.5337E-06 | 3.6544E-05 | 1.1224027  |
| LOC10013377 | XM_00171514 | LOC100133772 |    | PREDICTED: Homo sapiens s   | 0.00339204 | 0.00454239 | 1.12229509 |
| LOC728620   | XR_037241.1 | LOC728620    |    | PREDICTED: Homo sapiens n   | 0.00083526 | 0.00138067 | 1.12212316 |
| UBB         | NM_018955.2 | UBB          | 17 | Homo sapiens FLJ25987; MG   | 0.00027619 | 0.00054726 | 1.12210094 |
| IER5L       | NM_203434.1 | IER5L        | 9  | Homo sapiens MGC70833; b!   | 0.03238698 | 0.03087054 | 1.12206228 |
| SPTLC1      | NM_178324.1 | SPTLC1       | 9  | Homo sapiens HSAN1          | 0.00240677 | 0.00339119 | 1.12185244 |
| C13orf27    | NM_138779.2 | C13ORF27     | 13 | Homo sapiens chromosome 1   | 0.00232819 | 0.00329956 | 1.12175776 |
| FARSLB      | NM_005687.2 | FARSLB       | 2  | Homo sapiens PheHB; FRSB    | 0.0370519  | 0.03456602 | 1.12126659 |
| C8orf76     | NM_032847.1 | C8ORF76      | 8  | Homo sapiens MGC9784; FLJ   | 0.00014043 | 0.0003148  | 1.12111281 |
| LOC400721   | XM_930560.1 | LOC400721    |    | PREDICTED: Homo sapiens s   | 0.00045767 | 0.00083432 | 1.12108507 |
| COX7C       | NM_001867.2 | COX7C        | 5  | Homo sapiens cytochrome c   | 5.8321E-05 | 0.00015385 | 1.12067143 |
| TRAPPC3     | NM_014408.3 | TRAPPC3      | 1  | Homo sapiens BET3           | 0.00056294 | 0.00099602 | 1.12066742 |
| DENR        | NM_003677.3 | DENR         | 12 | Homo sapiens DRP; DRP1; S   | 0.00017735 | 0.00038065 | 1.12046589 |
| TXNDC17     | NM_032731.2 | TXNDC17      | 17 | Homo sapiens TRP14; MGC14   | 3.7443E-06 | 1.7972E-05 | 1.1202887  |
| PSMF1       | NM_178579.1 | PSMF1        | 20 | Homo sapiens PI31           | 0.01089459 | 0.01233726 | 1.12016929 |
| LASS6       | NM_203463.1 | LASS6        | 2  | Homo sapiens CerS6; MGC12   | 4.7041E-05 | 0.00013004 | 1.11980525 |
| XPNPEP3     | NM_022098.2 | XPNPEP3      | 22 | Homo sapiens APP3           | 0.00012413 | 0.00028489 | 1.11972845 |
| RAB3IP      | NM_175624.1 | RAB3IP       | 12 | Homo sapiens MGC71495; R    | 0.00197121 | 0.00285828 | 1.11958352 |
| ZFYVE21     | NM_024071.2 | ZFYVE21      | 14 | Homo sapiens MGC2550        | 0.00148425 | 0.00224919 | 1.11942552 |
| NUBPL       | NM_025152.1 | NUBPL        | 14 | Homo sapiens FLJ12660; C14  | 0.01085678 | 0.0123008  | 1.1193006  |
| C2orf30     | NM_015701.2 | C2ORF30      | 2  | Homo sapiens CL24936; CL2   | 0.01512089 | 0.01624274 | 1.11916308 |
| SURF4       | NM_033161.2 | SURF4        | 9  | Homo sapiens FLJ22993; ER   | 0.0017106  | 0.00253528 | 1.11915802 |
| LOC10013317 | XR_036907.1 | LOC10013317  |    | PREDICTED: Homo sapiens n   | 0.00015096 | 0.00033373 | 1.11901526 |
| COX6C       | NM_004374.2 | COX6C        | 8  | Homo sapiens cytochrome c   | 0.00035535 | 0.00067677 | 1.11891485 |
| TALDO1      | XM_938697.1 | TALDO1       |    | PREDICTED: Homo sapiens t   | 4.4377E-05 | 0.00012388 | 1.11859171 |
| RTN3        | NM_201428.1 | RTN3         | 11 | Homo sapiens NSPLII; NSPL2  | 0.03592402 | 0.03368213 | 1.11855829 |
| CFD         | NM_001928.2 | CFD          | 19 | Homo sapiens DF; ADN; PFD   | 2.3551E-05 | 7.4868E-05 | 1.11796741 |
| RGS2        | NM_002923.1 | RGS2         | 1  | Homo sapiens G0S8           | 0.00937587 | 0.01088002 | 1.11773147 |
| MSRB2       | NM_012228.2 | MSRB2        | 10 | Homo sapiens CBS-1; PILB; I | 0.00586038 | 0.00728211 | 1.11729528 |
| MCART1      | NM_033412.1 | MCART1       | 9  | Homo sapiens CG7943; MGC    | 0.00277779 | 0.00382071 | 1.11712609 |
| CDKN1A      | NM_078467.1 | CDKN1A       | 6  | Homo sapiens P21; MDA-6; S  | 0.00033915 | 0.00065186 | 1.11697888 |
| MGC71993    | NM_00100433 | MGC71993     |    | Homo sapiens similar to DNA | 0.00060328 | 0.0010517  | 1.11651979 |
| RAB5B       | NM_002868.2 | RAB5B        | 12 | Homo sapiens RAB5B, memb    | 0.00058344 | 0.00102443 | 1.11643168 |
| RBM6        | NM_005777.1 | RBM6         | 3  | Homo sapiens FLJ36517; DE   | 0.02260644 | 0.02291197 | 1.11610318 |
| UBE2E2      | NM_152653.1 | UBE2E2       | 3  | Homo sapiens UBCH8; FLJ25   | 0.05200548 | 0.04578068 | 1.11604889 |
| POLB        | NM_002690.1 | POLB         | 8  | Homo sapiens MGC125976      | 0.00071426 | 0.00120866 | 1.11600335 |
| DUXAP3      | NR_002220.1 | DUXAP3       | 10 | Homo sapiens double homeo   | 0.00034517 | 0.00066068 | 1.1157816  |
| LOC652864   | XM_942571.1 | LOC652864    |    | PREDICTED: Homo sapiens s   | 0.01553756 | 0.01661101 | 1.11573407 |
| CREB1       | NM_134442.2 | CREB1        | 2  | Homo sapiens MGC9284; CR    | 7.5806E-05 | 0.00019085 | 1.11555472 |
| TUBB6       | XM_940079.1 | TUBB6        |    | PREDICTED: Homo sapiens t   | 0.00898341 | 0.01048702 | 1.11554185 |
| IFI27L2     | NM_032036.2 | IFI27L2      | 14 | Homo sapiens TLH29; MGC4    | 0.02870237 | 0.02794746 | 1.11549446 |
| MRLC2       | NM_033546.2 | MRLC2        | 18 | Homo sapiens MLC-B          | 9.6919E-06 | 3.7069E-05 | 1.11530329 |
| HSBP1       | NM_001537.2 | HSBP1        | 16 | Homo sapiens DKFZp686D16    | 0.00013448 | 0.00030349 | 1.115177   |
| SLC16A12    | NM_213606.1 | SLC16A12     | 10 | Homo sapiens MCT12; DKFZ    | 0.00176998 | 0.00261137 | 1.11498754 |
| JUND        | NM_005354.2 | JUND         | 19 | Homo sapiens jun D proto-or | 3.4817E-05 | 0.0001023  | 1.11482803 |
| COX4NB      | NM_006067.3 | COX4NB       | 16 | Homo sapiens NOC4; C16orf   | 0.02983772 | 0.02887033 | 1.1148183  |
| LOC440704   | XM_944716.1 | LOC440704    |    | PREDICTED: Homo sapiens h   | 0.00754788 | 0.0090225  | 1.11404526 |
| TXNDC12     | NM_015913.2 | TXNDC12      | 1  | Homo sapiens AGR1; ERP19;   | 0.00011452 | 0.00026681 | 1.11401862 |
| SLC35B2     | NM_178148.1 | SLC35B2      | 6  | Homo sapiens UGTrel4; SLL;  | 0.00174902 | 0.0025848  | 1.1137294  |
| FN3KRP      | NM_024619.2 | FN3KRP       | 17 | Homo sapiens FLJ12171       | 0.00042998 | 0.00079407 | 1.11369181 |
| ATOX1       | NM_004045.3 | ATOX1        | 5  | Homo sapiens MGC138453; I   | 0.00117118 | 0.00184124 | 1.11356016 |
| PTRH2       | NM_016077.3 | PTRH2        | 17 | Homo sapiens CGI-147; FLJ3  | 0.00023404 | 0.00047854 | 1.11284607 |
| POP5        | NM_198201.1 | POP5         | 12 | Homo sapiens HSPC004; RPF   | 0.01977894 | 0.02042613 | 1.11264699 |
| VPS37C      | NM_017966.4 | VPS37C       | 11 | Homo sapiens FLJ20847       | 0.00084288 | 0.00139012 | 1.11255558 |
| C5orf21     | NM_032042.3 | C5ORF21      | 5  | Homo sapiens DKFZP564D17    | 0.03930803 | 0.03631554 | 1.11238875 |
| PHF13       | NM_153812.1 | PHF13        | 1  | Homo sapiens SPOC1; PHF5;   | 0.00183474 | 0.00269198 | 1.11207306 |
| AHR         | NM_001621.2 | AHR          | 7  | Homo sapiens aryl hydrocarb | 0.00078173 | 0.00130696 | 1.1116934  |
| CDAN1       | NM_138477.2 | CDAN1        |    | PREDICTED: Homo sapiens c   | 0.00034479 | 0.00066023 | 1.11131315 |
| COMMD6      | NM_203497.1 | COMMD6       | 13 | Homo sapiens Acrg           | 3.194E-05  | 9.4901E-05 | 1.11107678 |
| PNPT1       | NM_033109.2 | PNPT1        | 2  | Homo sapiens DKFZp762K19    | 0.00062491 | 0.00108316 | 1.11098865 |

## 5.0 ACL-Indepen Upreg

|             |             |             |    |                         |                 |            |            |            |
|-------------|-------------|-------------|----|-------------------------|-----------------|------------|------------|------------|
| FAHD2B      | NM_199336.1 | FAHD2B      | 2  | Homo sapiens            | DKFZp434N06     | 0.02478405 | 0.02480667 | 1.11094694 |
| NDUFA8      | NM_014222.2 | NDUFA8      | 9  | Homo sapiens            | CI-19KD; PGI1   | 1.9249E-05 | 6.4046E-05 | 1.11054453 |
| KLF13       | NM_015995.2 | KLF13       | 15 | Homo sapiens            | NSLP1; FKL2     | 0.00453603 | 0.00583479 | 1.11008966 |
| ANKRD30B    | NM_00102986 | ANKRD30B    | 18 | Homo sapiens            | NY-BR-1.1       | 0.00072797 | 0.00122901 | 1.11001413 |
| FADD        | NM_003824.2 | FADD        | 11 | Homo sapiens            | GIG3; MORT1     | 0.00311323 | 0.00421666 | 1.1098309  |
| AAGAB       | NM_024666.3 | AAGAB       | 15 | Homo sapiens            | DKFZp686G08     | 0.05541633 | 0.04833229 | 1.10951725 |
| SCARNA13    | NR_003002.1 | SCARNA13    | 14 | Homo sapiens            | U93             | 0.01726542 | 0.01820536 | 1.10925117 |
| MUL1        | NM_024544.2 | MUL1        | 1  | Homo sapiens            | mitochondrial   | 0.00242711 | 0.00341328 | 1.10916414 |
| LOC644250   | XM_929199.1 | LOC644250   | 13 | PREDICTED: Homo sapiens | h               | 0.00109146 | 0.00173236 | 1.1087267  |
| TBCB        | NM_001281.2 | TBCB        | 19 | Homo sapiens            | CG22; MGC14     | 0.0006373  | 0.00110051 | 1.10870219 |
| FKBP1A      | NM_000801.2 | FKBP1A      | 20 | Homo sapiens            | PKC12; FKBP1    | 0.00382538 | 0.00504796 | 1.1078303  |
| MYL12A      | NM_006471.2 | MYL12A      | 18 | Homo sapiens            | MLCB; MRLC3     | 6.2958E-05 | 0.00016367 | 1.10777641 |
| NDUFB3      | NM_002491.1 | NDUFB3      | 2  | Homo sapiens            | B12             | 1.6756E-05 | 5.7495E-05 | 1.10774051 |
| OCIAD2      | NM_152398.2 | OCIAD2      | 4  | Homo sapiens            | DKFZp686C03     | 0.00020089 | 0.00042117 | 1.10759784 |
| LMTK3       | XM_936372.1 | LMTK3       |    | PREDICTED: Homo sapiens | le              | 8.0604E-05 | 0.00020103 | 1.10737467 |
| C9orf80     | NM_021218.1 | C9orf80     | 9  | Homo sapiens            | HSPC043; RP1    | 0.00524175 | 0.00061362 | 1.10735113 |
| ZFYVE20     | NM_022340.2 | ZFYVE20     | 3  | Homo sapiens            | MGC126210; I    | 0.01178941 | 0.01318214 | 1.10702653 |
| HMGCS1      | NM_002130.4 | HMGCS1      | 5  | Homo sapiens            | MGC90332; H     | 0.00700949 | 0.00846775 | 1.10611244 |
| CCDC23      | NM_199342.1 | CCDC23      | 1  | Homo sapiens            | coiled-coil don | 0.00084913 | 0.00139832 | 1.10583268 |
| ZNF786      | NM_152411.1 | ZNF786      | 7  | Homo sapiens            | DKFZp762I13     | 0.03280965 | 0.03117858 | 1.10567903 |
| SFRS17A     | NM_005088.2 | SFRS17A     |    | Homo sapiens            | CXYorf3; DXY5   | 0.0019047  | 0.00277836 | 1.10552622 |
| COX4I1      | NM_001861.2 | COX4I1      | 16 | Homo sapiens            | MGC72016; C     | 5.5114E-05 | 0.00014775 | 1.10542464 |
| ID1         | NM_181353.1 | ID1         | 20 | Homo sapiens            | ID              | 4.2989E-05 | 0.00012062 | 1.10505482 |
| HES4        | NM_021170.2 | HES4        | 1  | Homo sapiens            | hairly and enh  | 0.00019888 | 0.00041786 | 1.10487575 |
| ALKBH2      | NM_00100165 | ALKBH2      | 12 | Homo sapiens            | ABH2; MGC90     | 0.05710216 | 0.04955142 | 1.10482813 |
| UBA1        | NM_003334.3 | UBA1        |    | Homo sapiens            | UBA1A; A1S9;    | 7.7837E-05 | 0.00019524 | 1.10479809 |
| CDK5RAP3    | NM_176096.1 | CDK5RAP3    | 17 | Homo sapiens            | MST016; LZAF    | 0.00016925 | 0.00036664 | 1.10432284 |
| LOC643509   | XM_928156.1 | LOC643509   | 18 | PREDICTED: Homo sapiens | s               | 7.1474E-05 | 0.00018198 | 1.10397062 |
| LOC642947   | NM_00103989 | LOC642947   | 9  | Homo sapiens            | hypothetical p  | 0.00033554 | 0.00064575 | 1.10374756 |
| PSMD4       | NM_153822.1 | PSMD4       | 1  | Homo sapiens            | pUB-R5; Rpn1    | 0.00087709 | 0.00143735 | 1.10355582 |
| LOC10013415 | XM_00171826 | LOC10013415 |    | PREDICTED: Homo sapiens | s               | 0.00115489 | 0.00181889 | 1.10336178 |
| NSF         | XM_938198.1 | NSF         |    | PREDICTED: Homo sapiens | h               | 0.03043338 | 0.02934635 | 1.10332912 |
| SLC44A4     | NM_025257.1 | SLC44A4     | 6  | Homo sapiens            | FLJ14491; NG    | 0.00022233 | 0.00045739 | 1.10331014 |
| TBCD        | NM_005993.3 | TBCD        | 17 | Homo sapiens            | KIAA0988        | 0.0473132  | 0.04239008 | 1.10310431 |
| AGAP8       | NM_00107768 | AGAP8       | 10 | Homo sapiens            | ArfGAP with G   | 0.02544204 | 0.02532371 | 1.10289084 |
| LOC10013272 | XM_00172332 | LOC10013272 | 15 | PREDICTED: Homo sapiens | h               | 0.00099694 | 0.00160381 | 1.10280504 |
| CNIH        | NM_005776.2 | CNIH        | 14 | Homo sapiens            | CNIH1; CNIL;    | 0.00046133 | 0.0008403  | 1.10271949 |
| SHCBP1      | NM_024745.2 | SHCBP1      | 16 | Homo sapiens            | MGC26900; FI    | 0.00044549 | 0.00081619 | 1.10265505 |
| PPM1D       | NM_003620.2 | PPM1D       | 17 | Homo sapiens            | PP2C-DELTA; \   | 0.04909467 | 0.04368728 | 1.10262771 |
| MMGT1       | XM_932381.1 | MMGT1       |    | Homo sapiens            | membrane ma     | 0.00233033 | 0.00330152 | 1.10240617 |
| GTF2A2      | NM_004492.1 | GTF2A2      | 15 | Homo sapiens            | TF2A2; HsT18    | 8.8035E-05 | 0.00021655 | 1.10207998 |
| ZNF512      | NM_032434.2 | ZNF512      | 2  | Homo sapiens            | MGC111046; I    | 0.01736788 | 0.0183046  | 1.10137736 |
| C8orf37     | NM_177965.2 | C8orf37     | 8  | Homo sapiens            | FLJ30600        | 0.0031677  | 0.00428448 | 1.10129984 |
| TRAPPC1     | NM_021210.2 | TRAPPC1     | 17 | Homo sapiens            | BET5; MUM2      | 0.01077163 | 0.01221378 | 1.10105669 |
| MCM8        | NM_182802.1 | MCM8        | 20 | Homo sapiens            | MGC4816; C2     | 0.00014772 | 0.00032787 | 1.10078728 |
| LOC441087   | NM_00101371 | LOC441087   | 5  | Homo sapiens            | hypothetical g  | 0.02339963 | 0.0236231  | 1.10043033 |
| SDHAP2      | NR_003265.3 | SDHAP2      | 3  | Homo sapiens            | succinate dehy  | 0.00871884 | 0.01021487 | 1.10008288 |
| HIBCH       | NM_014362.2 | HIBCH       | 2  | Homo sapiens            | HIBYL-COA-H     | 0.00856976 | 0.01007113 | 1.09952977 |
| NKTR        | NM_00101265 | NKTR        | 3  | Homo sapiens            | DKFZp686J06     | 0.04280654 | 0.03898936 | 1.09946494 |
| WASL        | NM_003941.2 | WASL        | 7  | Homo sapiens            | DKFZp779G08     | 0.02143434 | 0.02188837 | 1.09945973 |
| RUVBL2      | NM_006666.1 | RUVBL2      | 19 | Homo sapiens            | TIP49B; TIP48   | 0.01201251 | 0.01338725 | 1.09939896 |
| COMMD3      | NM_012071.2 | COMMD3      | 10 | Homo sapiens            | C10orf8; DKFz   | 0.00028816 | 0.00056803 | 1.09937994 |
| MRPL36      | NM_032479.2 | MRPL36      | 5  | Homo sapiens            | MGC104245; I    | 0.00026567 | 0.00053121 | 1.09924903 |
| ACTR1A      | NM_005736.2 | ACTR1A      | 10 | Homo sapiens            | ARP1            | 0.00455186 | 0.00585259 | 1.09920737 |
| ARMC1       | NM_018120.3 | ARMC1       | 8  | Homo sapiens            | FLJ10511; Arc   | 0.00361226 | 0.00479485 | 1.09909874 |
| USP49       | NM_018561.3 | USP49       | 6  | Homo sapiens            | MGC20741        | 0.01388055 | 0.01510829 | 1.09881124 |
| CHP         | NM_007236.3 | CHP         | 15 | Homo sapiens            | SLC9A1BP        | 0.00038542 | 0.00072537 | 1.09858176 |
| ZFP36       | NM_003407.1 | ZFP36       | 19 | Homo sapiens            | NUP475; GOS     | 0.00090075 | 0.00147037 | 1.09853765 |
| POLR2H      | NM_006232.2 | POLR2H      | 3  | Homo sapiens            | RPB17; hsRPB    | 2.2334E-05 | 7.1779E-05 | 1.09851679 |
| SNF8        | NM_007241.2 | SNF8        | 17 | Homo sapiens            | VPS22; EAP30    | 0.02345429 | 0.02367011 | 1.09842851 |
| BAT2D1      | NM_015172.2 | BAT2D1      | 1  | Homo sapiens            | BAT2-iso; XTP   | 0.00366015 | 0.00484961 | 1.09797502 |
| BSDC1       | NM_018045.4 | BSDC1       | 1  | Homo sapiens            | RP4-811H24.7    | 0.01493798 | 0.01606593 | 1.09786044 |
| ATG16L1     | NM_017974.3 | ATG16L1     | 2  | Homo sapiens            | ATG16L1; APG1   | 0.00683054 | 0.00828924 | 1.09731174 |
| C5orf28     | NM_022483.3 | C5orf28     | 5  | Homo sapiens            | MGC90226; M     | 0.03961852 | 0.03656005 | 1.09723371 |
| RAB11A      | NM_004663.3 | RAB11A      | 15 | Homo sapiens            | MGC1490; YL8    | 0.00438755 | 0.0056654  | 1.09699024 |
| ARHGEF3     | NM_019555.1 | ARHGEF3     | 3  | Homo sapiens            | DKFZP434F24     | 0.00964181 | 0.01112682 | 1.09673765 |
| ATP6V0E1    | NM_003945.3 | ATP6V0E1    | 5  | Homo sapiens            | Vma21p; ATP6    | 0.00135943 | 0.00208854 | 1.09651346 |
| AKR1D1      | NM_005989.2 | AKR1D1      | 7  | Homo sapiens            | 3o5bred; SRD    | 0.00123037 | 0.00192052 | 1.09645043 |
| LOC399748   | XR_018212.1 | LOC399748   |    | PREDICTED: Homo sapiens | n               | 0.0018607  | 0.00272278 | 1.09612695 |
| NMRAL1      | NM_020677.2 | NMRAL1      | 16 | Homo sapiens            | FLJ25918; HS    | 0.00721392 | 0.00868362 | 1.096059   |

## 5.0 ACL-Indepen Upreg

|             |                          |   |                                |            |            |            |
|-------------|--------------------------|---|--------------------------------|------------|------------|------------|
| FKTN        | NM_006731.2 FKTN         |   | 9 Homo sapiens MGC126857; I    | 5.6866E-05 | 0.00015129 | 1.09586943 |
| DDX1        | NM_004939.1 DDX1         |   | 2 Homo sapiens UKVH5d; DBP     | 9.594E-05  | 0.00023196 | 1.09576593 |
| PSMD1       | NM_002807.2 PSMD1        |   | 2 Homo sapiens S1; MGC1330     | 0.00074496 | 0.00125409 | 1.09575253 |
| MAGEB2      | NM_002364.3 MAGEB2       | X | Homo sapiens MAGE-XP-2; M      | 0.00029194 | 0.00057433 | 1.09567458 |
| BOLA2       | NM_00103182 BOLA2        |   | 16 Homo sapiens BOLA2A; My0    | 0.00165897 | 0.00246875 | 1.09566939 |
| LOC729090   | XR_015449.2 LOC729090    |   | 5 PREDICTED: Homo sapiens s    | 0.00032016 | 0.00062039 | 1.09542656 |
| DEF8        | NM_207514.1 DEF8         |   | 16 Homo sapiens MGC104349      | 0.00079372 | 0.00132323 | 1.09533559 |
| RIC8A       | NM_021932.4 RIC8A        |   | 11 Homo sapiens synembryn; M   | 0.03090583 | 0.02969423 | 1.09502529 |
| ALKBH5      | NM_017758.2 ALKBH5       |   | 17 Homo sapiens OFOXD1; OFO    | 5.6325E-05 | 0.00015026 | 1.09501707 |
| NDUFA4      | NM_002489.2 NDUFA4       |   | 7 Homo sapiens FLJ27440; MG    | 9.4691E-05 | 0.00022963 | 1.09489463 |
| AARSD1      | NM_025267.2 AARSD1       |   | 17 Homo sapiens MGC2744        | 0.04704566 | 0.04218052 | 1.09489146 |
| TMEM93      | NM_00101476 TMEM93       |   | 17 Homo sapiens MGC2963        | 0.00091895 | 0.00149507 | 1.09466159 |
| LILRB3      | NM_006864.1 LILRB3       |   | 19 Homo sapiens LIR-3; MGC13   | 2.1009E-05 | 6.8651E-05 | 1.0942907  |
| EPN1        | NM_013333.2 EPN1         |   | 19 Homo sapiens epsin 1 (EPN1  | 0.00071837 | 0.00121444 | 1.09412085 |
| MRPL17      | NM_022061.2 MRPL17       |   | 11 Homo sapiens RPML26; MRP-   | 0.0012575  | 0.00195556 | 1.09384871 |
| LOC10012806 | XR_037874.1 LOC100128062 |   | PREDICTED: Homo sapiens n      | 0.00269707 | 0.00372488 | 1.09377611 |
| TTC4        | NM_004623.2 TTC4         |   | 1 Homo sapiens MGC5097         | 0.00144317 | 0.00219718 | 1.09373783 |
| UBAC2       | NM_177967.2 UBAC2        |   | 13 Homo sapiens FLJ30548; MG   | 0.00938312 | 0.010887   | 1.09372281 |
| LLGL1       | NM_004140.3 LLGL1        |   | 17 Homo sapiens HUGL; LLGL; I  | 0.04019182 | 0.03696855 | 1.09368457 |
| ATP5J       | NM_00100370 ATP5J        |   | 21 Homo sapiens ATP5A; CF6; F  | 3.0155E-05 | 9.0455E-05 | 1.09362709 |
| TUBB2C      | NM_006088.5 TUBB2C       |   | 9 Homo sapiens TUBB2           | 0.0001663  | 0.00036153 | 1.09341158 |
| SEC61G      | NM_014302.3 SEC61G       |   | 7 Homo sapiens SSS1            | 1.0936E-05 | 4.0831E-05 | 1.09334624 |
| ENY2        | NM_020189.4 ENY2         |   | 8 Homo sapiens DC6; FLJ2048    | 0.00013105 | 0.00029751 | 1.09310992 |
| GPD1L       | NM_015141.2 GPD1L        |   | 3 Homo sapiens KIAA0089        | 0.00797351 | 0.00945912 | 1.09310306 |
| SAPS3       | NM_018312.3 SAPS3        |   | 11 Homo sapiens MGC125712; S   | 0.00267273 | 0.00370057 | 1.09254126 |
| RAB10       | NM_016131.2 RAB10        |   | 2 Homo sapiens RAB10, memb     | 0.00032933 | 0.00063576 | 1.09170165 |
| MRPL33      | NM_004891.2 MRPL33       |   | 2 Homo sapiens C2orf1; RPL33   | 9.8866E-05 | 0.00023772 | 1.09150429 |
| LOC10013016 | XM_00171912 LOC100130168 |   | PREDICTED: Homo sapiens h      | 0.00635632 | 0.00780223 | 1.09148955 |
| C16orf80    | NM_013242.2 C16ORF80     |   | 16 Homo sapiens EVORF; GTL3    | 0.02833052 | 0.02764676 | 1.09148331 |
| CBWD5       | NM_00102491 CBWD5        |   | 9 Homo sapiens FLJ40320; DC    | 0.03900532 | 0.03607766 | 1.09145096 |
| DUSP23      | NM_017823.3 DUSP23       |   | 1 Homo sapiens MOSP; FLJ204    | 0.00185248 | 0.00271166 | 1.09128163 |
| PDCD6       | NM_013232.2 PDCD6        |   | 5 Homo sapiens ALG-2; MGC11    | 0.00040467 | 0.0007556  | 1.09059106 |
| LOC727808   | XR_041978.1 LOC727808    |   | PREDICTED: Homo sapiens h      | 0.04961141 | 0.04403991 | 1.09008027 |
| FAT1        | NM_005245.3 FAT1         |   | 4 Homo sapiens ME5; hFat1; C   | 4.9E-05    | 0.00013435 | 1.09002825 |
| PPM1G       | NM_002707.3 PPM1G        |   | 2 Homo sapiens MGC2870; PP     | 0.0009161  | 0.00149125 | 1.08989211 |
| DNAJB6      | NM_005494.2 DNAJB6       |   | 7 Homo sapiens DKFZp566D08     | 0.00403707 | 0.00529308 | 1.08979997 |
| ARPC4       | NM_005718.3 ARPC4        |   | 3 Homo sapiens ARC20; p20-A    | 0.03075437 | 0.02957138 | 1.0897889  |
| GNL2        | NM_013285.1 GNL2         |   | 1 Homo sapiens dj423B22.6; M   | 0.00148855 | 0.00225415 | 1.08970118 |
| SPRED1      | NM_152594.1 SPRED1       |   | 15 Homo sapiens NFLS; FLJ339   | 0.01213492 | 0.01350308 | 1.08929705 |
| SPSB3       | NM_080861.3 SPSB3        |   | 16 Homo sapiens SSB3; C16orf   | 0.01347638 | 0.01474153 | 1.08909321 |
| HLA-E       | NM_005516.4 HLA-E        |   | 6 Homo sapiens DKFZp686P19     | 0.01628595 | 0.01730986 | 1.08890402 |
| ROCK2       | NM_004850.3 ROCK2        |   | 2 Homo sapiens KIAA0619        | 0.00010918 | 0.00025696 | 1.08880463 |
| PDE4C       | NM_000923.1 PDE4C        |   | 19 Homo sapiens PDE4C-791; D   | 0.00095965 | 0.00155121 | 1.08863908 |
| ITM2B       | NM_021999.2 ITM2B        |   | 13 Homo sapiens E3-16; BRICD   | 0.00324752 | 0.00437356 | 1.08820492 |
| ARL2        | NM_001667.1 ARL2         |   | 11 Homo sapiens ARFL2          | 0.00465854 | 0.00596963 | 1.08802391 |
| LRPPRC      | NM_133259.2 LRPPRC       |   | 2 Homo sapiens GP130; CLON     | 0.02833874 | 0.0276517  | 1.08786647 |
| LOC728533   | XR_015610.2 LOC728533    |   | 19 PREDICTED: Homo sapiens n   | 0.00283155 | 0.00388249 | 1.08731101 |
| GJC1        | NM_005497.2 GJC1         |   | 17 Homo sapiens DKFZp686P07    | 8.8128E-05 | 0.00021671 | 1.08729974 |
| RGS10       | NM_002925.3 RGS10        |   | 10 Homo sapiens regulator of G | 0.01128928 | 0.0127104  | 1.08705762 |
| MRPS17      | NM_015969.2 MRPS17       |   | 7 Homo sapiens RPMS17; HSP     | 0.00264091 | 0.00366171 | 1.08684067 |
| TMEM85      | NM_016454.2 TMEM85       |   | 15 Homo sapiens PIG17; MGC2    | 0.00032064 | 0.00062077 | 1.08679731 |
| BCKDK       | NM_005881.1 BCKDK        |   | 16 Homo sapiens branched chai  | 0.00193602 | 0.00281656 | 1.08666781 |
| CST3        | NM_000099.2 CST3         |   | 20 Homo sapiens MGC117328      | 0.00044835 | 0.0008204  | 1.08654088 |
| TAF1C       | NM_139353.1 TAF1C        |   | 16 Homo sapiens SL1; MGC:39    | 0.00768298 | 0.00915779 | 1.08647776 |
| ARGLU1      | NM_018011.2 ARGLU1       |   | 13 Homo sapiens FLJ10154; RP   | 0.00141036 | 0.00215471 | 1.08639518 |
| ZNF223      | NM_013361.2 ZNF223       |   | Homo sapiens zinc finger pro   | 0.04315065 | 0.03924576 | 1.08635209 |
| TOMM20      | NM_014765.2 TOMM20       |   | 1 Homo sapiens translocase of  | 0.00065926 | 0.00113043 | 1.08627    |
| CLTA        | NM_007096.1 CLTA         |   | 9 Homo sapiens LCA             | 0.00555911 | 0.00696198 | 1.08614245 |
| C7orf30     | NM_138446.1 C7ORF30      |   | 7 Homo sapiens chromosome 7    | 0.00080868 | 0.00134483 | 1.08595148 |
| RBCK1       | NM_006462.3 RBCK1        |   | Homo sapiens XAP4; RNF54;      | 0.05554004 | 0.04842575 | 1.08594583 |
| RNF219      | NM_024546.3 RNF219       |   | 13 Homo sapiens DKFZp686N15    | 0.03867641 | 0.0358301  | 1.08593651 |
| PIR         | NM_00101810 PIR          | X | Homo sapiens pirin (iron-bin   | 0.00928935 | 0.01078676 | 1.0855741  |
| TMEM69      | NM_016486.3 TMEM69       |   | 1 Homo sapiens C1orf154; MG    | 0.01196868 | 0.01334518 | 1.08554754 |
| BLZF1       | NM_003666.2 BLZF1        |   | 1 Homo sapiens JEM1; JEM-1;    | 0.00289959 | 0.003964   | 1.08534274 |
| GGCT        | NM_024051.2 GGCT         |   | 7 Homo sapiens FLJ11717; MG    | 0.00735183 | 0.00882903 | 1.08523626 |
| ZW10        | NM_004724.2 ZW10         |   | 11 Homo sapiens MGC149821; I   | 0.00493874 | 0.0062819  | 1.08508095 |
| STRAP       | NM_007178.2 STRAP        |   | 12 Homo sapiens MAWD; PT-WC    | 0.00019026 | 0.000404   | 1.08488865 |
| FLJ44124    | NM_00103975 FLJ44124     |   | 7 Homo sapiens FLJ26154        | 0.00509532 | 0.00645485 | 1.08482631 |
| C10orf58    | NM_032333.2 C10ORF58     |   | 10 Homo sapiens MGC4248        | 0.00178766 | 0.00263612 | 1.08457722 |
| RPL7L1      | NM_198486.2 RPL7L1       |   | 6 Homo sapiens MGC62004; d:    | 0.0012495  | 0.00194554 | 1.0844435  |

## 5.0 ACL-Indepen Upreg

|             |             |               |    |                         |                |            |            |            |
|-------------|-------------|---------------|----|-------------------------|----------------|------------|------------|------------|
| FAM82A2     | NM_018145.1 | FAM82A2       | 15 | Homo sapiens            | ptpip51; RMD:  | 0.00731121 | 0.00878386 | 1.08432895 |
| SDHAF2      | NM_017841.1 | SDHAF2        | 11 | Homo sapiens            | FLJ20487       | 0.00365886 | 0.00484937 | 1.08422165 |
| EIF4A3      | NM_014740.2 | EIF4A3        | 17 | Homo sapiens            | eIF4AIII; MGC  | 0.00051955 | 0.00092898 | 1.08351345 |
| CISD1       | NM_018464.2 | CISD1         | 10 | Homo sapiens            | C10orf70; MDI  | 0.00088714 | 0.00145139 | 1.08336326 |
| AMZ2        | NM_016627.4 | AMZ2          | 17 | Homo sapiens            | archaelysin fa | 0.00339193 | 0.00454294 | 1.08270146 |
| LOC646567   | XM_940087.1 | LOC646567     | 1  | PREDICTED: Homo sapiens | s              | 0.01385949 | 0.01508724 | 1.0821958  |
| C8orf59     | XM_929832.1 | C8ORF59       | 8  | Homo sapiens            | chromosome 8   | 5.2961E-05 | 0.00014298 | 1.08214098 |
| NDUFB9      | NM_005005.2 | NDUFB9        | 8  | Homo sapiens            | DKFZp566O17    | 9.0204E-05 | 0.00022052 | 1.08186831 |
| LAMP1       | NM_005561.2 | LAMP1         | 13 | Homo sapiens            | LGP120; LAMP   | 0.00023699 | 0.00048345 | 1.08182981 |
| KIAA0174    | NM_014761.2 | KIAA0174      | 16 | Homo sapiens            | MGC117220      | 0.0007916  | 0.00132044 | 1.08182532 |
| LOC10013044 | XM_00171506 | LOC100130445  |    | PREDICTED: Homo sapiens | s              | 0.00546439 | 0.00685607 | 1.08179476 |
| SLC4A2      | NM_003040.2 | SLC4A2        | 7  | Homo sapiens            | HKB3; NBND3    | 0.03850494 | 0.03570895 | 1.08139429 |
| CSF2RA      | NM_172249.1 | CSF2RA        |    | Homo sapiens            | CSF2R; CSF2R   | 0.02646479 | 0.02619017 | 1.08111175 |
| SULT1A1     | NM_177534.1 | SULT1A1       | 16 | Homo sapiens            | HAST1/HAST2    | 0.03455263 | 0.03258084 | 1.08093845 |
| COX7A2L     | NM_004718.2 | COX7A2L       | 2  | Homo sapiens            | EB1; COX7RP;   | 0.00044433 | 0.00081423 | 1.08064597 |
| SEC61B      | NM_006808.2 | SEC61B        | 9  | Homo sapiens            | Sec61 beta su  | 0.00067534 | 0.00115303 | 1.08045342 |
| NDUFA3      | NM_004542.1 | NDUFA3        | 19 | Homo sapiens            | B9             | 0.00070397 | 0.00119286 | 1.08040088 |
| ACO1        | NM_002197.1 | ACO1          | 9  | Homo sapiens            | IREBP; IRP1; I | 0.00192437 | 0.00280333 | 1.08022122 |
| AP2S1       | NM_004069.3 | AP2S1         | 19 | Homo sapiens            | AP17; CLAPS2   | 8.0027E-05 | 0.00019976 | 1.08010909 |
| RPL11       | NM_000975.2 | RPL11         | 1  | Homo sapiens            | IGB34          | 0.00051871 | 0.00092767 | 1.07994173 |
| CAB39       | NM_016289.2 | CAB39         | 2  | Homo sapiens            | FLJ22682; CG   | 0.00295803 | 0.00403259 | 1.07925975 |
| DCTN2       | NM_006400.3 | DCTN2         | 12 | Homo sapiens            | DCTN50; RBP!   | 0.00155828 | 0.00234035 | 1.07897203 |
| LOC653147   | XM_939231.1 | LOC653147     | 11 | Homo sapiens            | hCG1995786 (   | 0.00268884 | 0.00371523 | 1.07858042 |
| LOC401397   | Hs.117929   | LOC401397     | 7  | PREDICTED: Homo sapiens | h              | 0.00080751 | 0.0013434  | 1.07848126 |
| G3BP2       | NM_012297.3 | G3BP2         | 4  | Homo sapiens            | GTPase activa  | 0.02757434 | 0.02706536 | 1.07844198 |
| EZR         | NM_003379.4 | EZR           | 6  | Homo sapiens            | VIL2; MGC158   | 0.01750181 | 0.01841258 | 1.07763671 |
| PDHA1       | NM_000284.1 | PDHA1         |    | Homo sapiens            | PDHCE1A; PDI   | 0.00213246 | 0.00306322 | 1.07760446 |
| HNRNPA0     | NM_006805.3 | HNRNPA0       | 5  | Homo sapiens            | hnrNPA0        | 0.02082607 | 0.02134672 | 1.07736997 |
| GMD5        | NM_001500.2 | GMD5          | 6  | Homo sapiens            | GMN            | 0.00480159 | 0.00612877 | 1.07691483 |
| LOC10013239 | XM_00171380 | LOC10013239 X |    | PREDICTED: Homo sapiens | h              | 0.00835963 | 0.00985985 | 1.07652762 |
| C14orf173   | NM_022489.2 | C14ORF173     | 14 | Homo sapiens            | DKFZp762A02    | 0.04824192 | 0.04309015 | 1.07606595 |
| SLC2A1      | NM_006516.1 | SLC2A1        | 1  | Homo sapiens            | MGC141895; I   | 0.00042714 | 0.00078967 | 1.0759558  |
| RPL38       | NM_00103525 | RPL38         | 17 | Homo sapiens            | ribosomal prl  | 0.00062823 | 0.00108719 | 1.07572222 |
| LOC728877   | XR_041759.1 | LOC728877     | 22 | PREDICTED: Homo sapiens | n              | 0.009791   | 0.01127082 | 1.07524241 |
| FAM115A     | NM_014719.1 | FAM115A       | 7  | Homo sapiens            | KIAA0738       | 0.00016311 | 0.00035617 | 1.07497891 |
| CCDC24      | NM_152499.1 | CCDC24        | 1  | Homo sapiens            | RP5-1198O20.   | 0.04319872 | 0.03927726 | 1.0744768  |
| SAFB2       | NM_014649.1 | SAFB2         | 19 | Homo sapiens            | KIAA0138       | 0.00789061 | 0.00937217 | 1.07421357 |
| FAF2        | NM_014613.1 | FAF2          | 5  | Homo sapiens            | ETEA; KIAA08   | 0.00620529 | 0.00765863 | 1.07419382 |
| ATP5C1      | NM_005174.2 | ATP5C1        | 10 | Homo sapiens            | ATP5CL1; ATP!  | 0.00116308 | 0.00183079 | 1.0737724  |
| RPA3        | NM_002947.3 | RPA3          | 7  | Homo sapiens            | REPA3          | 0.00308394 | 0.00418408 | 1.07362934 |
| COX7A2      | NM_001865.2 | COX7A2        | 6  | Homo sapiens            | MGC118950; I   | 0.00066744 | 0.00114154 | 1.07340462 |
| ALDH7A1     | XM_937964.1 | ALDH7A1       | 5  | Homo sapiens            | ATQ1; PDE; E!  | 0.00488309 | 0.00622103 | 1.07281284 |
| BRMS1       | NM_015399.3 | BRMS1         | 11 | Homo sapiens            | DKFZp564A06    | 0.00423925 | 0.00550957 | 1.07262837 |
| TIPARP      | NM_015508.2 | TIPARP        | 3  | Homo sapiens            | PARP-7; PARP-  | 0.0193528  | 0.02003321 | 1.07261926 |
| ZNF430      | NM_025189.2 | ZNF430        | 19 | Homo sapiens            | MGC133232; I   | 0.02044201 | 0.02099968 | 1.07260951 |
| CTSL1       | NM_145918.2 | CTSL1         | 9  | Homo sapiens            | MEP; CATL; FL  | 0.01148668 | 0.01289954 | 1.07225665 |
| FEZ2        | NM_005102.2 | FEZ2          | 2  | Homo sapiens            | MGC117372; I   | 0.01250333 | 0.01383931 | 1.07178007 |
| PDCD7       | NM_005707.1 | PDCD7         | 15 | Homo sapiens            | HES18; ES18;   | 0.01145731 | 0.01287315 | 1.07156835 |
| KIAA0196    | NM_014846.2 | KIAA0196      | 8  | Homo sapiens            | SPG8; MGC11    | 0.0450333  | 0.04070487 | 1.07131203 |
| SOX9        | NM_000346.2 | SOX9          | 17 | Homo sapiens            | CMPD1; CMD1    | 0.01016669 | 0.01163309 | 1.07128901 |
| H3F3B       | NM_005324.3 | H3F3B         | 17 | Homo sapiens            | H3F3A; H3.3B   | 0.00322023 | 0.00434348 | 1.07095189 |
| C20orf24    | NM_199485.1 | C20ORF24      | 20 | Homo sapiens            | PNAS-11; RIP!  | 0.00026821 | 0.00053484 | 1.07087269 |
| COPS7B      | NM_022730.1 | COPS7B        | 2  | Homo sapiens            | FLJ12612; MG   | 0.02431945 | 0.02441964 | 1.07084079 |
| EML4        | NM_019063.2 | EML4          | 2  | Homo sapiens            | FLJ10942; C2!  | 0.00888633 | 0.0103889  | 1.07069934 |
| UQCRCQ      | NM_014402.2 | UQCRCQ        | 5  | Homo sapiens            | QP-C; QCR8     | 0.0005278  | 0.00094201 | 1.07060928 |
| AMY1C       | NM_00100821 | AMY1C         | 1  | Homo sapiens            | AMY1           | 0.03825907 | 0.03551847 | 1.07046934 |
| PPP2R2A     | NM_002717.2 | PPP2R2A       | 8  | Homo sapiens            | MGC52248; FI   | 0.02690215 | 0.02652725 | 1.07033132 |
| EXOSC9      | NM_00103419 | EXOSC9        | 4  | Homo sapiens            | p5; PMSCL1; F  | 0.01149565 | 0.01290632 | 1.0703043  |
| COQ5        | NM_032314.2 | COQ5          | 12 | Homo sapiens            | MGC4767; MG    | 0.00503719 | 0.00639044 | 1.07008328 |
| PPP6C       | NM_002721.3 | PPP6C         | 9  | Homo sapiens            | protein phosph | 0.00370057 | 0.00489948 | 1.06999732 |
| SSNA1       | NM_003731.1 | SSNA1         | 9  | Homo sapiens            | NA14; NA-14;   | 0.02496766 | 0.02495344 | 1.06982181 |
| OCIAD1      | NM_017830.1 | OCIAD1        | 4  | Homo sapiens            | TPA018; MGC:   | 0.00244322 | 0.00343209 | 1.0695396  |
| CRKL        | NM_005207.2 | CRKL          | 22 | Homo sapiens            | v-crk sarcoma  | 0.01009249 | 0.01155874 | 1.06922693 |
| LY6E        | NM_002346.1 | LY6E          | 8  | Homo sapiens            | TSA-1; RIGE;   | 0.00286653 | 0.00392492 | 1.06800466 |
| MANBAL      | NM_022077.3 | MANBAL        | 20 | Homo sapiens            | mannosidase,   | 0.01964107 | 0.02029809 | 1.06779381 |
| PLEKHM2     | XM_290944.4 | PLEKHM2       | 1  | Homo sapiens            | SKIP; RP11-1!  | 0.02474312 | 0.02478549 | 1.06778595 |
| LTA4H       | NM_000895.1 | LTA4H         | 12 | Homo sapiens            | leukotriene A4 | 0.00714809 | 0.00861501 | 1.06735851 |
| LOC402175   | XR_038253.1 | LOC402175     |    | PREDICTED: Homo sapiens | n              | 0.00080734 | 0.00134337 | 1.06712325 |
| UBA52       | NM_003333.2 | UBA52         | 19 | Homo sapiens            | CEP52; HUBC!   | 0.00095662 | 0.00154718 | 1.0670107  |
| WBP5        | NM_00100661 | WBP5          |    | Homo sapiens            | DKFZp313K19    | 0.00417981 | 0.00544685 | 1.06657482 |

## 5.0 ACL-Indepen Upreg

|             |                         |   |                                |            |            |            |
|-------------|-------------------------|---|--------------------------------|------------|------------|------------|
| PSMD2       | NM_002808.3 PSMD2       |   | 3 Homo sapiens MGC14274; S     | 0.00117047 | 0.00184078 | 1.06643537 |
| EMD         | NM_000117.1 EMD         | X | Homo sapiens STA; EDM          | 0.00574917 | 0.00716218 | 1.06632817 |
| TCEB1       | NM_005648.2 TCEB1       |   | 8 Homo sapiens SIII            | 0.00180446 | 0.00265465 | 1.06632187 |
| C2orf69     | NM_153689.5 C2ORF69     |   | 2 Homo sapiens chromosome 2    | 0.00901845 | 0.01052093 | 1.0662217  |
| CD81        | NM_004356.3 CD81        |   | 11 Homo sapiens S5.7; TAPA1;   | 0.00284244 | 0.00389498 | 1.06611207 |
| CD151       | NM_004357.3 CD151       |   | 11 Homo sapiens TSPAN24; ME    | 0.01371287 | 0.01495919 | 1.06598716 |
| NUCB1       | NM_006184.3 NUCB1       |   | 19 Homo sapiens DKFZp686A15    | 0.00556398 | 0.00696708 | 1.06560175 |
| ATP5H       | NM_00100378 ATP5H       |   | 17 Homo sapiens ATPQ; ATP5JD   | 0.0004427  | 0.00081244 | 1.06511155 |
| TMEM9B      | NM_020644.1 TMEM9B      |   | 11 Homo sapiens C11orf15       | 0.03470567 | 0.03271109 | 1.06466145 |
| DYNLT1      | NM_006519.1 DYNLT1      |   | 6 Homo sapiens tctex-1; CW-1   | 0.00106354 | 0.00169664 | 1.06420819 |
| ACTG1       | NM_001614.2 ACTG1       |   | 17 Homo sapiens DFNA26; ACT    | 0.00018903 | 0.00040159 | 1.06414533 |
| TACC1       | NM_006283.1 TACC1       |   | 8 Homo sapiens DKFZp686K18     | 0.03081249 | 0.02962077 | 1.06371872 |
| RHOA        | NM_001664.2 RHOA        |   | 3 Homo sapiens RHO12; RHOH     | 0.0010133  | 0.00162625 | 1.06310971 |
| ETFA        | NM_000126.1 ETFA        |   | 15 Homo sapiens GA2; MADD; E   | 0.00963697 | 0.01112562 | 1.0629119  |
| FNBP1       | NM_015033.2 FNBP1       |   | 9 Homo sapiens FBP17; MGC1     | 0.05681551 | 0.04937592 | 1.06271039 |
| MDH2        | NM_005918.2 MDH2        |   | 17 Homo sapiens ATPQ; MDH; I   | 0.01198702 | 0.01336223 | 1.06262193 |
| CAPZB       | NM_004930.2 CAPZB       |   | 1 Homo sapiens CAPB; MGC10     | 0.03530913 | 0.03320496 | 1.0626065  |
| C20orf43    | NM_016407.1 C20ORF43    |   | 20 Homo sapiens HSPC164; SH    | 0.0027376  | 0.00377194 | 1.06258226 |
| PSMC2       | NM_002803.2 PSMC2       |   | 7 Homo sapiens MGC3004; Nb     | 0.00403553 | 0.00529263 | 1.06253194 |
| GLO1        | NM_006708.1 GLO1        |   | 6 Homo sapiens GLYI; GLOD1     | 0.00263401 | 0.00365389 | 1.0624339  |
| CPD         | NM_001304.3 CPD         |   | 17 Homo sapiens carboxypeptid  | 0.05474894 | 0.0478501  | 1.06230234 |
| NDRG1       | NM_006096.2 NDRG1       |   | 8 Homo sapiens CMT4D; GC4;     | 0.03898942 | 0.03606676 | 1.06174448 |
| RBM5        | NM_005778.1 RBM5        |   | 3 Homo sapiens LUCA15; RMB!    | 0.03170525 | 0.03036257 | 1.06129978 |
| GABPB2      | NM_002041.3 GABPB2      |   | 15 Homo sapiens NRF2B2; GAB    | 0.00125946 | 0.00195758 | 1.05985657 |
| SAT1        | NM_002970.1 SAT1        | X | Homo sapiens KFSD; SSAT-1      | 0.01170341 | 0.01311104 | 1.05976028 |
| SDF2L1      | NM_022044.2 SDF2L1      |   | 22 Homo sapiens stromal cell-d | 0.00489885 | 0.00623839 | 1.05946048 |
| METAP1      | NM_015143.1 METAP1      |   | 4 Homo sapiens DKFZp781C04     | 0.0147855  | 0.01593122 | 1.0592411  |
| BCAP31      | NM_005745.6 BCAP31      | X | Homo sapiens DXS1357E; 6C      | 0.00695338 | 0.00841155 | 1.0584813  |
| SURF6       | NM_006753.3 SURF6       |   | 9 Homo sapiens FLJ30322        | 0.04447006 | 0.04027044 | 1.05839862 |
| CAPZA2      | NM_006136.2 CAPZA2      |   | 7 Homo sapiens CAPZ; CAPP2     | 0.01780545 | 0.01865819 | 1.05806014 |
| MRFAP1      | NM_033296.1 MRFAP1      |   | 4 Homo sapiens PAM14; PGR1     | 0.00291917 | 0.00398829 | 1.05750529 |
| RPL26L1     | NM_016093.2 RPL26L1     |   | 5 Homo sapiens RPL26P1; FLJ    | 0.01073484 | 0.01218152 | 1.05709919 |
| LOC642489   | XM_925989.1 LOC642489   |   | 6 PREDICTED: Homo sapiens s    | 0.01487238 | 0.01600518 | 1.05696347 |
| DNAL4       | NM_005740.2 DNAL4       |   | 22 Homo sapiens PIG27          | 0.04568955 | 0.04120466 | 1.05661821 |
| LITAF       | NM_004862.2 LITAF       |   | 16 Homo sapiens MGC125274; I   | 0.00991192 | 0.01138761 | 1.05643484 |
| LOC149501   | XR_017100.2 LOC149501   |   | 1 PREDICTED: Homo sapiens n    | 0.00895051 | 0.01045418 | 1.05641699 |
| C8orf41     | NM_025115.1 C8ORF41     |   | 8 Homo sapiens FLJ23263        | 0.0355939  | 0.03444051 | 1.05543747 |
| SSBP1       | NM_003143.1 SSBP1       |   | 7 Homo sapiens SSBP            | 0.00552714 | 0.0069259  | 1.05524066 |
| FAM39E      | XM_930604.1 FAM39E      |   | 9 Homo sapiens FLJ00038        | 0.00949889 | 0.0109966  | 1.055071   |
| SSR4        | NM_006280.1 SSR4        | X | Homo sapiens TRAPD             | 0.01680578 | 0.0177934  | 1.05498382 |
| ORC6L       | NM_014321.2 ORC6L       |   | 16 Homo sapiens ORC6           | 0.0046706  | 0.00591353 | 1.05454534 |
| TOMM7       | NM_019059.2 TOMM7       |   | 7 Homo sapiens TOM7            | 0.00084212 | 0.00138964 | 1.05432488 |
| SEPW1       | NM_003009.2 SEPW1       |   | 19 Homo sapiens selW           | 0.01676006 | 0.01774714 | 1.05423211 |
| TMEM106C    | NM_024056.2 TMEM106C    |   | 12 Homo sapiens MGC5576; MG    | 0.01227112 | 0.01362871 | 1.05387343 |
| EIF3I       | NM_003075.1 EIF3I       |   | 1 Homo sapiens EIF35; TRIP-    | 0.00481745 | 0.00614811 | 1.05330651 |
| YWHAB       | NM_139327.2 YWHAB       |   | 20 Homo sapiens KCIP-1; HS1;   | 0.01120271 | 0.01262427 | 1.05312905 |
| ATP6V1E1    | NM_00103936 ATP6V1E1    |   | 22 Homo sapiens ATP6E2; ATP6   | 0.00574473 | 0.00715767 | 1.05243762 |
| CAP1        | NM_006367.2 CAP1        |   | 1 Homo sapiens CAP1-PEN; CA    | 0.00265806 | 0.00368259 | 1.0522364  |
| SHFM1       | NM_006304.1 SHFM1       |   | 7 Homo sapiens SHSF1; DSS1;    | 0.00548646 | 0.00688082 | 1.05221224 |
| LOC729324   | XR_041500.1 LOC729324   |   | PREDICTED: Homo sapiens n      | 0.00636911 | 0.00781356 | 1.05214302 |
| TMBIM6      | NM_003217.1 TMBIM6      |   | 12 Homo sapiens BI-1; TMBIM6   | 0.0025571  | 0.00356184 | 1.0518938  |
| XPNPEP1     | NM_020383.2 XPNPEP1     |   | 10 Homo sapiens SAMP; XPNPE    | 0.04039256 | 0.0371104  | 1.05181168 |
| PKM2        | NM_002654.3 PKM2        |   | 15 Homo sapiens OIP3; TCB; PK  | 0.01560137 | 0.01666501 | 1.05180011 |
| RPS10       | NM_001014.3 RPS10       |   | 6 Homo sapiens MGC88819        | 0.02427551 | 0.0243811  | 1.05139702 |
| ARCN1       | NM_001655.3 ARCN1       |   | 11 Homo sapiens COPD           | 0.00451172 | 0.00580778 | 1.05108055 |
| APOA1BP     | NM_144772.1 APOA1BP     |   | 1 Homo sapiens MGC119145; I    | 0.01852587 | 0.0192933  | 1.05048329 |
| LOC10000858 | NM_003671.2 LOC10000858 |   | Homo sapiens 28S ribosomal     | 0.02169538 | 0.02210092 | 1.05036386 |
| ATP6V1F     | NM_004231.2 ATP6V1F     |   | 7 Homo sapiens Vma7; MGC12     | 0.00760745 | 0.00908009 | 1.05020515 |
| MKRN1       | NM_013446.2 MKRN1       |   | 7 Homo sapiens RNF61; FLJ21    | 0.03241847 | 0.03089385 | 1.05015575 |
| LOC646942   | XR_016892.2 LOC646942   |   | 7 PREDICTED: Homo sapiens n    | 0.0436166  | 0.03961205 | 1.04982296 |
| CXXC5       | NM_016463.5 CXXC5       |   | 5 Homo sapiens HSPC195         | 0.01089685 | 0.01233823 | 1.04922524 |
| F2R         | NM_001992.2 F2R         |   | 5 Homo sapiens PAR1; TR; HT    | 0.05515031 | 0.0481769  | 1.04902652 |
| ATP5O       | NM_001697.2 ATP5O       |   | 21 Homo sapiens OSCP; ATPO     | 0.00679173 | 0.00825355 | 1.04890334 |
| C14orf156   | NM_031210.3 C14ORF156   |   | 14 Homo sapiens DC50; SLIRP;   | 0.00466031 | 0.00597102 | 1.04783301 |
| ARF4        | NM_001660.2 ARF4        |   | 3 Homo sapiens ARF2            | 0.02087547 | 0.02138237 | 1.04777346 |
| TECR        | NM_138501.4 TECR        |   | 19 Homo sapiens TER; SC2       | 0.01551065 | 0.01659235 | 1.04770278 |
| MGC16703    | NM_145042.2 MGC16703    |   | 22 Homo sapiens tubulin, alpha | 0.01376185 | 0.01500329 | 1.04749364 |
| BANP        | NM_017869.3 BANP        |   | 16 Homo sapiens DKFZp761H17    | 0.05270089 | 0.04629068 | 1.04729056 |
| NDUFB7      | NM_004146.4 NDUFB7      |   | 19 Homo sapiens CI-B18; B18;   | 0.04107936 | 0.03764285 | 1.04719657 |
| C20orf100   | NM_032883.1 C20ORF100   |   | 20 Homo sapiens dj1108D11.2;   | 0.03320573 | 0.03149358 | 1.04713521 |

## 5.0 ACL-Indepen Upreg

|           |                         |                                |            |            |            |
|-----------|-------------------------|--------------------------------|------------|------------|------------|
| MDH1      | NM_005917.2 MDH1        | 2 Homo sapiens MOR2; MDH-s     | 0.00617576 | 0.00762862 | 1.04678961 |
| MAPRE1    | NM_012325.1 MAPRE1      | 20 Homo sapiens EB1; MGC1291   | 0.02230674 | 0.02264222 | 1.04668854 |
| PSMA5     | NM_002790.2 PSMA5       | 1 Homo sapiens ZETA; MGC111    | 0.0054058  | 0.00679325 | 1.04635557 |
| UBC       | NM_021009.3 UBC         | 12 Homo sapiens HMG20          | 0.00111946 | 0.00177135 | 1.04629223 |
| NDUFA12   | NM_018838.3 NDUFA12     | 12 Homo sapiens DAP13; B17.2   | 0.01961363 | 0.02027212 | 1.04620362 |
| PSMD12    | XM_946047.1 PSMD12      | PREDICTED: Homo sapiens p      | 0.00630138 | 0.00775432 | 1.0460237  |
| C16orf61  | NM_020188.2 C16ORF61    | 16 Homo sapiens DC13; 231006   | 0.01285235 | 0.01416131 | 1.04594193 |
| HLA-A     | NM_002116.5 HLA-A       | 6 Homo sapiens major histocor  | 0.00436283 | 0.00563763 | 1.04489211 |
| PHB       | NM_002634.2 PHB         | 17 Homo sapiens PHB1           | 0.01173259 | 0.01313367 | 1.04406542 |
| COX17     | NM_005694.1 COX17       | 3 Homo sapiens MGC117386; I    | 0.00676258 | 0.00822382 | 1.04383009 |
|           | 39326 NM_004404.3 39326 | 2 Homo sapiens KIAA0158; NE    | 0.02866591 | 0.02792126 | 1.04292114 |
| MAD2L2    | NM_006341.2 MAD2L2      | 1 Homo sapiens REV7; MAD2B     | 0.0243056  | 0.02440853 | 1.0423481  |
| LOC91561  | NM_00108082 LOC91561    | Homo sapiens hCG1992539 (      | 0.01914314 | 0.01985131 | 1.04205936 |
| LOC644745 | XR_038862.1 LOC644745   | PREDICTED: Homo sapiens n      | 0.00410035 | 0.00536481 | 1.04158567 |
| CCNI      | NM_006835.2 CCNI        | 4 Homo sapiens CYC1; CYI       | 0.01790041 | 0.01874427 | 1.04146502 |
| DCXR      | NM_016286.2 DCXR        | 17 Homo sapiens P34H; HCR1I;   | 0.05042355 | 0.0446074  | 1.04044081 |
| FAM177A1  | NM_173607.3 FAM177A1    | 14 Homo sapiens DKFZp686J121   | 0.04873055 | 0.04344258 | 1.03979417 |
| LOC646785 | XR_017607.1 LOC646785   | 6 PREDICTED: Homo sapiens n    | 0.00981158 | 0.01129155 | 1.03911624 |
| RPL37A    | NM_000998.4 RPL37A      | 2 Homo sapiens MGC74786        | 0.04158972 | 0.03803901 | 1.03877584 |
| LAIR1     | NM_021708.1 LAIR1       | 19 Homo sapiens CD305; LAIR-   | 0.04097172 | 0.03755598 | 1.03858371 |
| ITIH5     | NM_00100185 ITIH5       | 10 Homo sapiens DKFZp686F01    | 0.03231217 | 0.03082267 | 1.0376926  |
| IMAA      | XR_000959.1 IMAA        | 16 Homo sapiens MMAA           | 0.03205038 | 0.03061622 | 1.03767034 |
| CIB1      | NM_006384.2 CIB1        | 15 Homo sapiens SIP2-28; KIP;  | 0.03155271 | 0.03023298 | 1.03730572 |
| LOC391833 | XR_038761.1 LOC391833   | PREDICTED: Homo sapiens n      | 0.05712314 | 0.04955491 | 1.03720799 |
| BOP1      | NM_015201.3 BOP1        | 8 Homo sapiens KIAA0124        | 0.03354923 | 0.03176786 | 1.03590219 |
| TPT1      | NM_003295.1 TPT1        | 13 Homo sapiens TCTP; pO2; HF  | 0.04861742 | 0.04335493 | 1.03586895 |
| RPL27     | NM_000988.2 RPL27       | 17 Homo sapiens ribosomal prot | 0.04365241 | 0.03964047 | 1.03583472 |
| C19orf31  | NM_00101437 C19ORF31    | 19 Homo sapiens FLJ40719       | 0.04903064 | 0.04365244 | 1.03578016 |
| OSTC      | NM_021227.2 OSTC        | 4 Homo sapiens oligosaccharyl  | 0.04414133 | 0.04002232 | 1.03538528 |
| SAE1      | NM_005500.1 SAE1        | 19 Homo sapiens SUA1; AOS1;    | 0.03569461 | 0.03351001 | 1.03465188 |
| CCR6      | NM_031409.2 CCR6        | 6 Homo sapiens CKR-L3; DRY-t   | 0.04809777 | 0.04298766 | 1.03447388 |
| GLRX5     | NM_016417.2 GLRX5       | 14 Homo sapiens GRX5; C14orf   | 0.01458243 | 0.01574335 | 1.03396807 |
| HDAC1     | NM_004964.2 HDAC1       | 1 Homo sapiens GON-10; DKF     | 0.03378058 | 0.03195243 | 1.03272491 |
| ANXA2     | NM_00100285 ANXA2       | 15 Homo sapiens P36; LPC2D; A  | 0.02766984 | 0.02713784 | 1.02841633 |
